# Supplementary material for: Synthetic Lethality between Cohesin and WNT Signaling Pathways in Diverse Cancer Contexts
Source: MDPI journal article supplement (doi:10.3390/cells13070608), 2024-03-30
Supplement: s1 [file s1]

Table S1. Primers used to investigate the cohesin loading at *MYC* locus.

| MYC promoter | Forward                | Reverse               |
|--------------|------------------------|-----------------------|
| P0           | TGCCAGTAGAGGGCACACTT   | CCAATCGCTATGCTGGATTT  |
| P1/P2        | GTATAAAAGCCGGTTTTTCGGG | CTCTGCCTCTCGCTGGAATTA |

Table S2. Primers used to validate RNA-seq data and *MYC* expression by RT-PCR.

| Gene    | Nucleotide sequence    |
|---------|------------------------|
| PSMD7 F | TCGAACAGTTTTGCAGTTCCT  |
| PSMD7 R | CTGTGTGGTACCAGCCAAC    |
| PSMD4 F | CCTTGGCCCTTCGTGTATCT   |
| PSMD4 R | GGCATCGTCTGAGTCTCTTTCA |
| PSMB9 F | CGCTTCACCACAGACGCTAT   |
| PSMB9 R | TGCCCAAGATGACTCGATGG   |
| SFHM1 F | AGTAGGAGAGCCCTGTGGAG   |
| SFHM1 R | TTTGTTACGCAAACGCCAGG   |
| PAX6 F  | AGTGAATCAGCTCGGTGGTG   |
| PAX6 R  | AATTCGGGAAATGTCGCACG   |
| HPRT F  | AGCCAGACTTTGTTGGATTG   |
| HPRT R  | TACTAAGCAGATGGCCACAGA  |
| MYC F   | TTCGGGTAGTGGAAAACAG    |
| MYC R   | TAGAAATACGGCTGCACCGA   |

Table S3. NCI-60 cancer panel cell used in this work.

| Cell line   | Cancer                                             |
|-------------|----------------------------------------------------|
| 786-0       | renal adenocarcinoma                               |
| A498        | renal carcinoma                                    |
| A549        | lung adenocarcinoma                                |
| ACHN        | renal carcinoma                                    |
| BT549       | breast                                             |
| CAKI1       | renal adenocarcinoma                               |
| CCRFCEM     | peripheral blood acute lymphoblastic leukemia      |
| COLO225     | colon adenocarcinoma                               |
| DU145       | prostate carcinoma                                 |
| EKVX        | lung adenocarcinoma                                |
| HCC2998     | colon adenocarcinoma                               |
| HCT116      | colon carcinoma                                    |
| HCT15       | colon adenocarcinoma                               |
| HOP62       | lung adenocarcinoma                                |
| HOP92       | lung carcinoma                                     |
| HS587T      | Breast carcinoma                                   |
| HT29        | recto-sigmoid colon adenocarcinoma                 |
| IGROV1      | left ovary cysto adenocarcinoma                    |
| K562        | pleural effusion chronic myelogenous leukemia      |
| LOXIHVI     | lymphnode metastasis malignant amelanotic melanoma |
| M14         | amelanotic melanoma                                |
| MALME 3M    | malignant melanoma                                 |
| MCF7        | breast adenocarcinoma                              |
| MDA 231     | breast                                             |
| MDA 468     | breast                                             |
| MDA435      | pleural effusion melanoma                          |
| NCI ADR RES | ovarian adenocarcinoma                             |
| NCI H322    | lung bronchi alveolar carcinoma                    |
| NCI H522    | Lung adenocarcinoma                                |
| NCI H226    | lung squamous cell                                 |
| NCI H23     | lung adenocarcinoma                                |
| OVCAR3      | ovarian carcinoma                                  |
| OVCAR5      | ovarian carcinoma                                  |
| OVCAR8      | ovarian carcinoma                                  |
| PC3         | prostate carcinoma                                 |
| RFX393      | renal hypernephroma                                |
| RPMI        | peripheral blood multiple myeloma                  |
| SF268       | plastic astocytoma                                 |
| SF295       | cns gliosarcoma                                    |
| SF539       | cns gliosarcoma                                    |
| SK MEL 2    | malignant melanoma                                 |
| SKMEL28     | malignant melanoma                                 |
| SKMEL5      | skin metastasis-thigh malignant melanoma           |
| SKOV3       | ovary adenocarcinoma                               |
| SNB 75      | cns astrocytoma                                    |
| SNB19       | cns glioblastoma                                   |
| SNC12C      | renal carcinoma                                    |

|         |                                   |
|---------|-----------------------------------|
| SR      | immunoblastic large cell lymphoma |
| SW60    | colon adenocarcinoma              |
| T47D    | breast carcinoma                  |
| TK-10   | renal carcinoma                   |
| U251    | cns glioblastoma                  |
| UACC257 | malignant melanoma                |
| UACC62  | malignant melanoma                |
| UO31    | renal carcinoma                   |

Table S4. Dysregulated genes in common among cohesin mutated cancer cells.

AEBP1  
AKR1C2  
ALKBH4  
ANKMY2  
ANO6  
ARHGDIG  
ATP5A1  
BOLA1  
C12orf56  
C7orf73  
CAB39  
CALML5  
CBS  
CCDC82  
CD24  
CNIH2  
COL5A1  
COX6A1  
COX6C  
CRYBG3  
CTXN1  
CYP4V2  
DBN1  
DCLK1  
DDAH2  
DGKG  
DLGAP3  
DNAAF3  
EFEMP1  
EFHD1  
EFNA4  
EFR3B  
EHF  
EPHA6  
ERBB4  
EVL  
FAHD1  
FAR2P1  
FERMT1  
FOXI3  
FRAS1  
FRG1CP  
FUT9  
GPR27  
GUCY1A3  
GULP1  
HDAC4  
HIGD2A  
HLA-A

HMGB3  
HSD17B12  
IFNGR2  
IFT22  
IGSF5  
IL6ST  
JTB  
KARS  
KCNMA1  
KDM5B  
KIF13B  
LAMTOR4  
LGALS3  
LINC00885  
LINC01006  
LRRK1  
LYPD1  
MAPKBP1  
MATK  
MBP  
MDFIC  
MIER1  
MPDZ  
MRPL41  
MTIF3  
MYLIP  
MYO10  
NLRC5  
NPR2  
OSMR  
PAX6  
PCDHB13  
PCDHB4  
PDZD4  
PLA2G3  
PMAIP1  
POLR2J  
PRKAR2A  
PRR36  
PRTFDC1  
PSMB9  
PSMD4  
PSMD7  
RAB31  
RIMS4  
ROGDI  
RPRD2  
RTTN  
SDCCAG8  
SEMA3F  
SGK223

SH2D4A  
SHFM1  
SLC30A7  
SNAR-E  
SNRPE  
SP100  
SSFA2  
STEAP1  
SYNE4  
SYNJ2  
TAF11  
TBC1D20  
TCEAL8  
TEAD1  
TENM1  
TFAP2A  
TMEM183B  
TMEM191A  
TMEM254  
TMEM51  
TNNT1  
TRIM47  
TUB  
UBASH3B  
VPS72  
YAP1  
ZAK  
ZBTB18  
ZNF175  
ZNF433  
ZNF480  
ZNF704  
ZSCAN21

Table S5. Classification of dysregulated genes by molecular function and biological process through DAVID tool

| GO Term                                                                                   | Gene count | Pvalue   |
|-------------------------------------------------------------------------------------------|------------|----------|
| GO:0018108~peptidyl-tyrosine phosphorylation                                              | 5          | 0,008175 |
| GO:0060333~interferon-gamma-mediated signaling pathway                                    | 3          | 0,010238 |
| GO:0006535~cysteine biosynthetic process from serine                                      | 2          | 0,011333 |
| GO:0001958~endochondral ossification                                                      | 3          | 0,013365 |
| GO:0019343~cysteine biosynthetic process via cystathionine                                | 2          | 0,016952 |
| GO:0001974~blood vessel remodeling                                                        | 3          | 0,020681 |
| GO:0043418~homocysteine catabolic process                                                 | 2          | 0,02254  |
| GO:0010749~regulation of nitric oxide mediated signal transduction                        | 2          | 0,02254  |
| GO:0061026~cardiac muscle tissue regeneration                                             | 2          | 0,02254  |
| GO:0070814~hydrogen sulfide biosynthetic process                                          | 2          | 0,02254  |
| GO:0019448~L-cysteine catabolic process                                                   | 2          | 0,02254  |
| GO:0019344~cysteine biosynthetic process                                                  | 2          | 0,02254  |
| GO:0021587~cerebellum morphogenesis                                                       | 2          | 0,028095 |
| GO:0043506~regulation of JUN kinase activity                                              | 2          | 0,028095 |
| GO:0045794~negative regulation of cell volume                                             | 2          | 0,028095 |
| GO:0007399~nervous system development                                                     | 7          | 0,030231 |
| GO:0034097~response to cytokine                                                           | 3          | 0,030461 |
| GO:0019346~transsulfuration                                                               | 2          | 0,03362  |
| GO:0006565~L-serine catabolic process                                                     | 2          | 0,03362  |
| GO:1902041~regulation of extrinsic apoptotic signaling pathway via death domain receptors | 2          | 0,03362  |
| GO:0007173~epidermal growth factor receptor signaling pathway                             | 3          | 0,034056 |
| GO:0038165~oncostatin-M-mediated signaling pathway                                        | 2          | 0,039113 |
| GO:0006563~L-serine metabolic process                                                     | 2          | 0,039113 |
| GO:0042262~DNA protection                                                                 | 2          | 0,039113 |
| GO:0035556~intracellular signal transduction                                              | 7          | 0,043447 |
| GO:0050667~homocysteine metabolic process                                                 | 2          | 0,044575 |
| GO:0060351~cartilage development involved in endochondral bone morphogenesis              | 2          | 0,050007 |
| GO:0048861~leukemia inhibitory factor signaling pathway                                   | 2          | 0,050007 |
| GO:0045893~positive regulation of transcription, DNA-templated                            | 9          | 0,053463 |
| GO:0051593~response to folic acid                                                         | 2          | 0,055408 |
| GO:0060576~intestinal epithelial cell development                                         | 2          | 0,055408 |



Table S6. Fold change of the core genes as identified through STRING analysis.

| GENE    | A549     | CCRFCEM    | HCC2998   | HCT15    | HCT116   | RFX393   | SF539    | UO31     |
|---------|----------|------------|-----------|----------|----------|----------|----------|----------|
| AEBP1   | 8,781881 | -7,2421136 | 6,2582193 | 4,331768 | 8,651378 | -6,29959 | 8,893221 | 4,609508 |
| ATP5A1  | 1,506823 | 0,99769598 | 1,396185  | 1,041263 | 1,166753 | 1,798665 | 1,693419 | 1,159415 |
| CNIH2   | 4,810471 | 2,14625663 | 5,2538755 | 5,33844  | 4,979673 | 4,565897 | 5,335135 | 2,813232 |
| COL5A1  | -3,72704 | 4,42277437 | 9,9132061 | 9,736137 | 7,73084  | -7,59382 | -7,111   | -3,49548 |
| COX6A1  | 0,948685 | 1,0035897  | 1,2598939 | 1,138598 | 0,997369 | 0,768972 | 1,132275 | 1,111442 |
| COX6C   | 2,085412 | 1,2770899  | 2,0955803 | 2,600954 | 1,541953 | 0,806694 | 1,428309 | 2,051815 |
| EFNA4   | 1,857483 | 2,74234841 | 1,1912141 | 2,145185 | 1,984843 | 3,915648 | 2,557189 | 2,092331 |
| EPHA6   | 5,553663 | 10,0259143 | 10,404797 | 10,22366 | 9,674417 | 3,236467 | 9,912908 | 5,271792 |
| ERBB4   | 9,965668 | 10,1899532 | 7,1704213 | 10,38949 | 6,180831 | 9,765947 | 10,07289 | 5,14034  |
| HDAC4   | -3,90296 | -4,5422614 | -3,669352 | -2,71021 | -2,94275 | -2,55449 | -3,82672 | -2,40194 |
| HIGD2A  | 1,026246 | 2,69673853 | 2,1332292 | 1,307718 | 1,469376 | 1,158269 | 1,321822 | 2,045639 |
| HLA-A   | -1,62468 | -3,159552  | -4,843231 | -4,25773 | -3,32619 | -5,81819 | -3,56923 | -3,74    |
| IGSF5   | 5,452931 | 9,11757733 | 9,4967212 | 5,850408 | 4,011027 | 7,310567 | 9,006076 | 2,828348 |
| KARS    | 1,307147 | 1,6323852  | 1,1615521 | 1,567462 | 1,248558 | 0,769304 | 1,120598 | 0,787161 |
| KDM5B   | 1,908905 | 1,92963578 | 2,9365567 | 3,661349 | 2,450383 | 2,710088 | 1,423219 | 1,92559  |
| MATK    | 13,41421 | 8,50223566 | 14,015534 | 10,40087 | 13,28504 | 5,562463 | 8,909455 | 9,728849 |
| MBP     | -3,48624 | 8,70492606 | -4,449248 | -4,05842 | -3,79233 | -5,062   | 5,096394 | -5,32066 |
| MPDZ    | -1,94657 | 10,9709312 | 11,350166 | 11,16784 | 10,6193  | 10,55379 | -1,56829 | -2,39327 |
| NLRC5   | -3,67689 | -5,7224071 | -7,794282 | -6,3077  | -4,13293 | -7,25047 | -6,05032 | -5,62313 |
| PAX6    | -9,43533 | -10,439776 | -7,479587 | -9,0772  | -9,45952 | -13,1605 | -11,6155 | -13,2967 |
| POLR2J  | 1,637573 | 1,76048453 | 1,7592206 | 2,348731 | 1,465465 | 1,442296 | 1,723672 | 1,49771  |
| PSMB9   | -3,11822 | -6,6563643 | -3,653017 | -3,76306 | -3,17268 | -7,91417 | -5,25622 | -6,61754 |
| PSMD4   | 1,28967  | 1,55368227 | 1,1703388 | 1,629802 | 1,123902 | 1,340787 | 0,637512 | 1,415487 |
| PSMD7   | 0,821862 | 1,18968592 | 1,0216243 | 1,180327 | 1,11296  | 0,998745 | 1,228027 | 0,640761 |
| RPRD2   | 1,305857 | 0,97806286 | 1,1912296 | 1,147184 | 1,513213 | 1,950583 | 1,067892 | 1,59466  |
| RTTN    | -3,09737 | -3,5924349 | -3,27124  | -2,68151 | -3,32017 | -2,69378 | -2,46833 | -2,6328  |
| SDCCAG8 | -1,79874 | -1,3995031 | -1,731946 | -1,88981 | -1,79565 | -1,36481 | -1,50522 | -1,67822 |
| SEMA3F  | 2,767987 | 7,62693093 | 1,5095825 | 2,783946 | 1,713493 | 2,451309 | 2,946458 | 3,012534 |
| SHFM1   | 1,115161 | 1,26447387 | 1,0540022 | 1,603245 | 1,176263 | 1,251091 | 1,0144   | 0,649253 |
| SNRPE   | 1,516899 | 1,11611427 | 1,6649296 | 1,852026 | 1,251715 | 1,375647 | 0,755952 | 1,672792 |
| SP100   | -3,66922 | -4,3994037 | -3,813757 | -3,57286 | -3,77314 | -5,54397 | -5,02581 | -4,91081 |
| TAF11   | 2,100474 | 1,2653927  | 1,2957028 | 1,782188 | 1,607644 | 1,536219 | 0,827676 | 2,220905 |
| TEAD1   | -1,54112 | 13,2429457 | -1,310147 | -1,05479 | -1,44303 | -1,10197 | -1,06496 | -2,01676 |
| TFAP2A  | 1,235104 | 15,1973756 | 5,2677044 | 2,773967 | 2,022446 | 5,17402  | 3,16382  | 3,558483 |
| YAP1    | -1,61659 | 6,96097813 | -2,260392 | -1,85507 | -2,18588 | -0,99808 | -1,20363 | -2,48089 |
| ZBTB18  | -6,56115 | -7,7809039 | -5,966399 | -6,22223 | -4,17612 | -5,33338 | -7,20582 | -8,01148 |

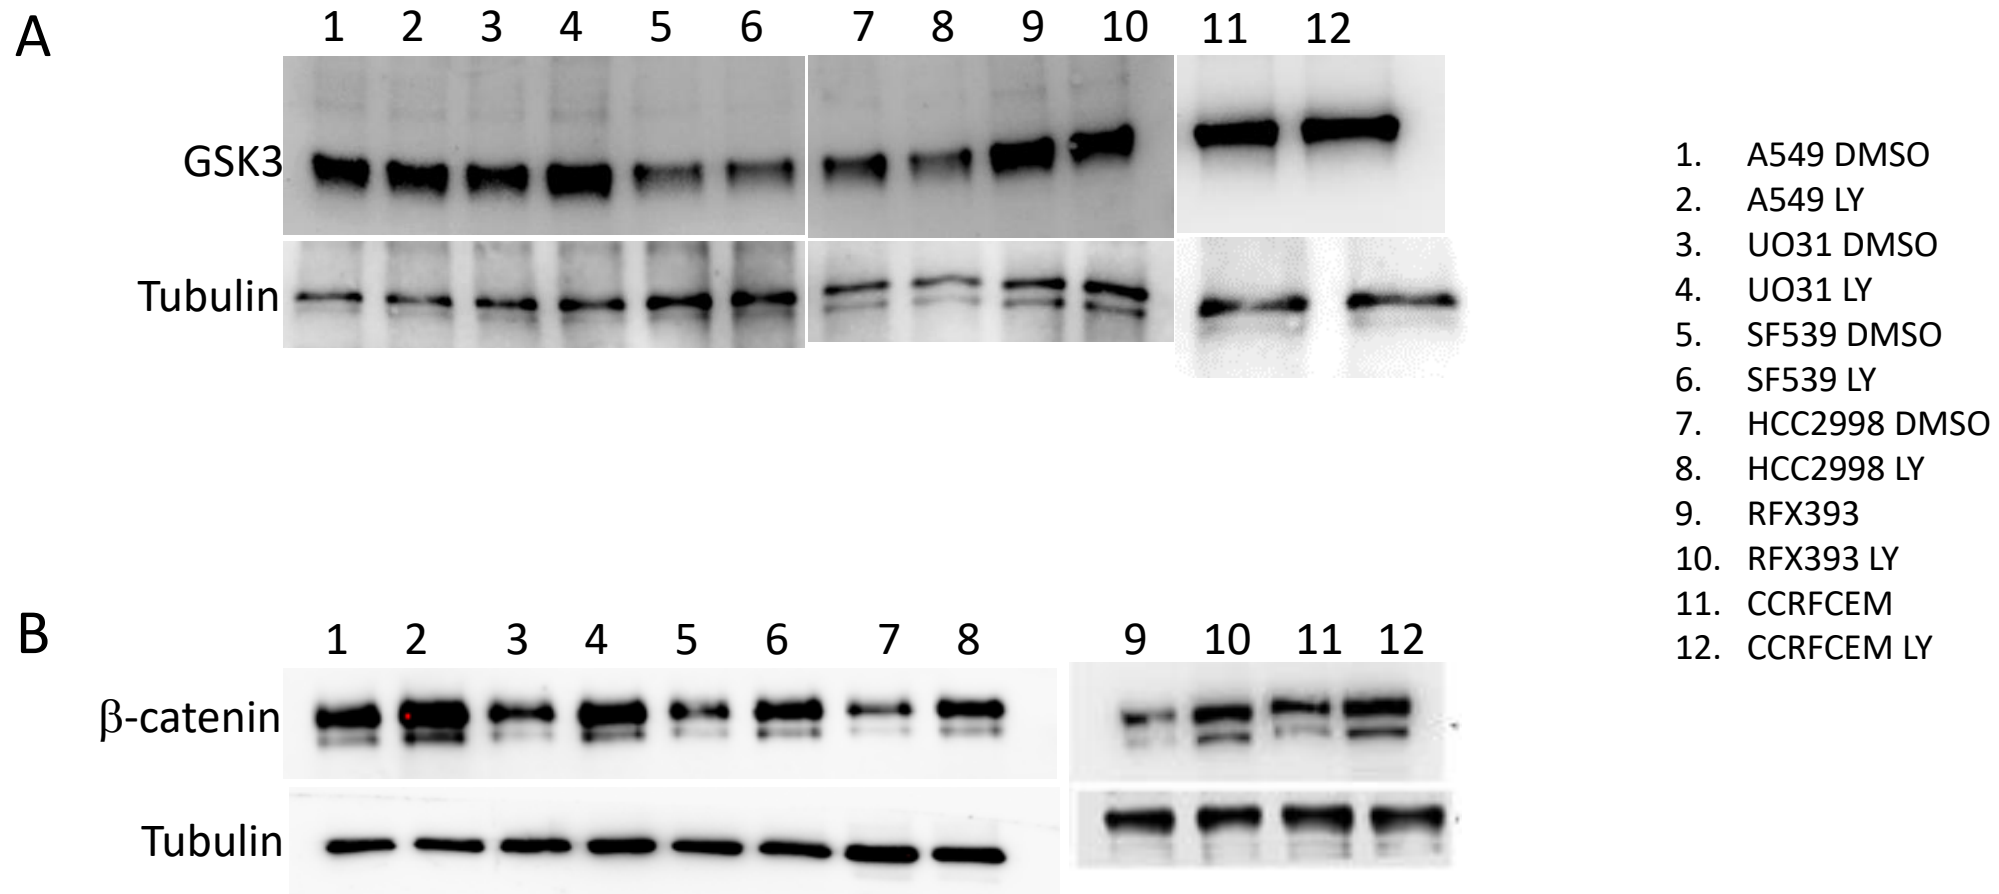

Figure S1. Effects of LY2090314 (LY) treatment in cancer cell lines carrying mutation in cohesin genes.

A

NIPBL

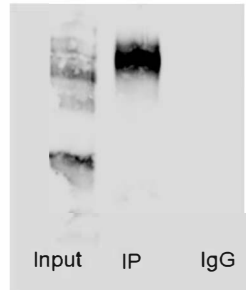

B

RAD21

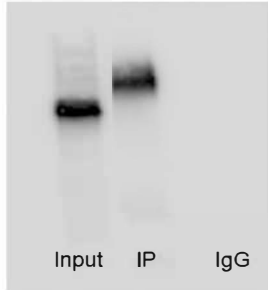

C

SMC3

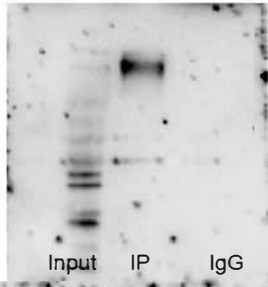

Figure S2.  $\beta$ -catenin and cohesin interaction.

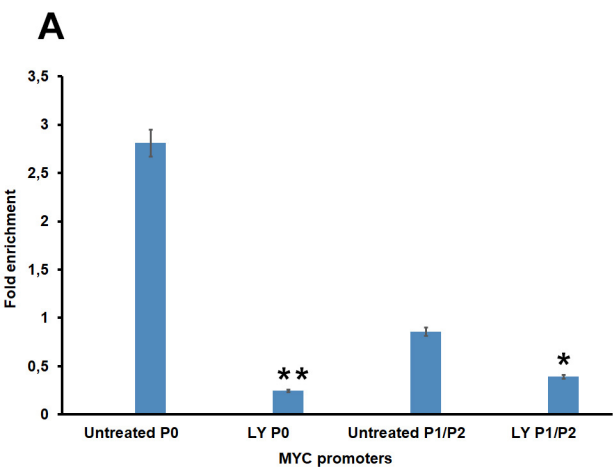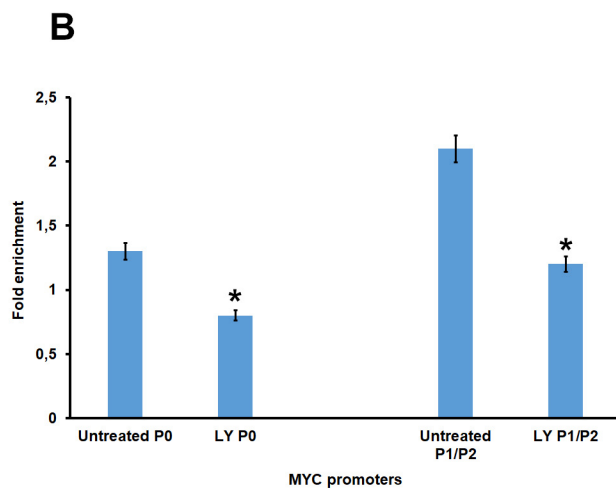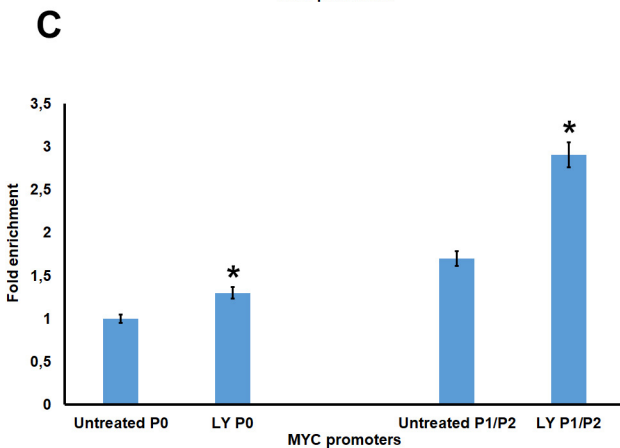

Figure S3. Effects of LY2090314 (LY) treatment on the *MYC* locus. \*  $p < 0.05$

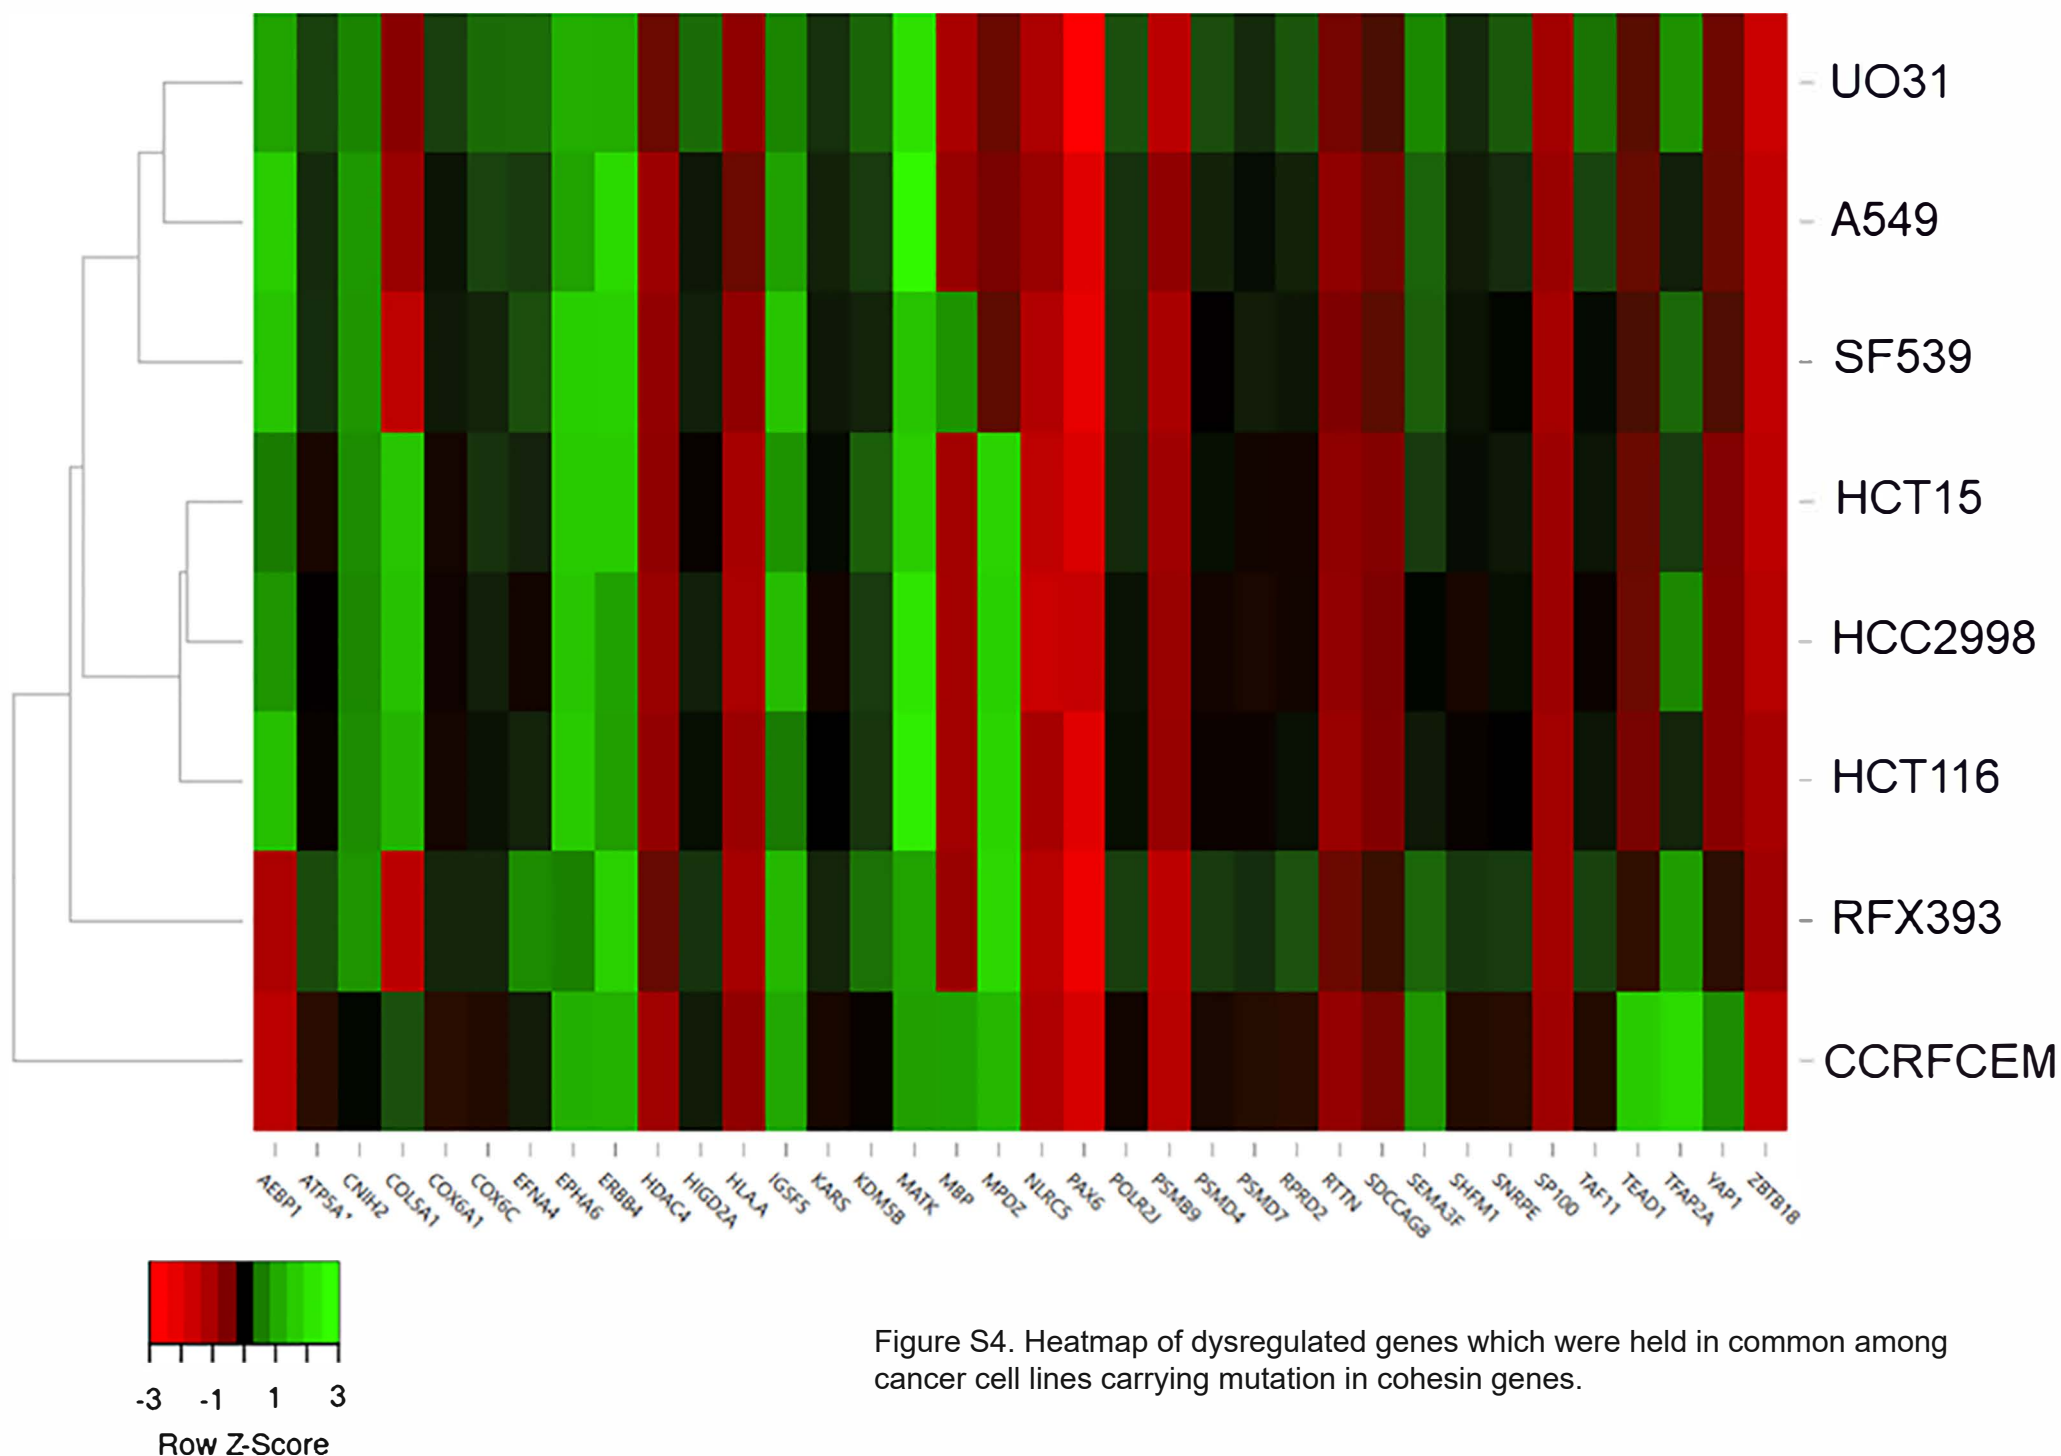

Figure S4. Heatmap of dysregulated genes which were held in common among cancer cell lines carrying mutation in cohesin genes.

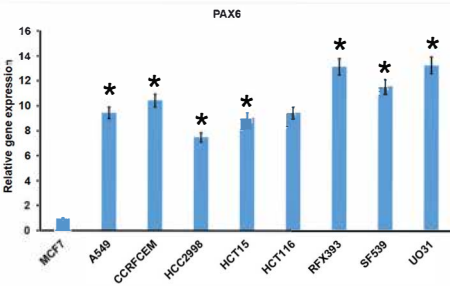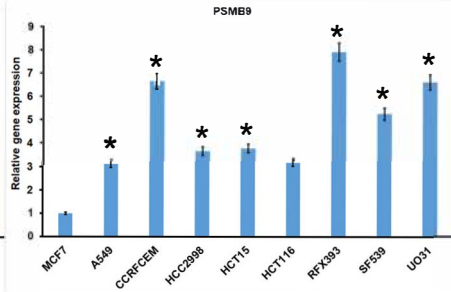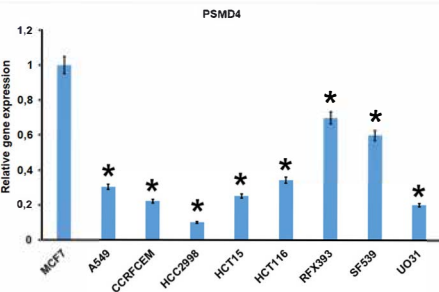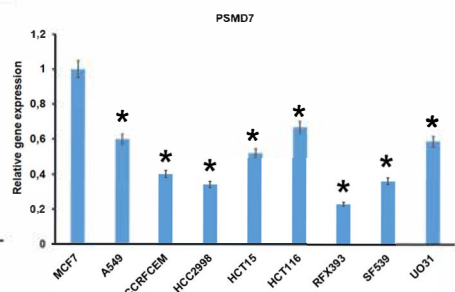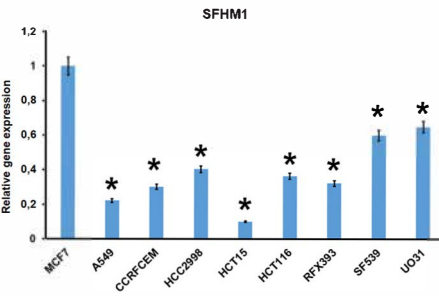

Figure S5. RNA-seq data was validated by RT-PCR. \*  $p < 0.05$

# DataSet

| Gene      | log2FoldChange | FDR       | A549 |
|-----------|----------------|-----------|------|
| FBP1      | 14,83041042    | 1,16E-22  |      |
| PRMT6     | 14,62005523    | 3,01E-22  |      |
| TACSTD2   | 14,1320197     | 1,31E-20  |      |
| RAB25     | 13,94198259    | 4,28E-20  |      |
| ESR1      | 13,54465197    | 4,74E-19  |      |
| MATK      | 13,41420953    | 1,11E-18  |      |
| BGN       | 13,03006642    | 5,27E-06  |      |
| DSCAM-AS1 | 12,99903837    | 3,03E-10  |      |
| GGT6      | 12,6265048     | 2,07E-15  |      |
| PRSS8     | 12,54176389    | 1,30E-16  |      |
| ADAMTS19  | 12,446067      | 4,40E-16  |      |
| APCDD1    | 12,40906493    | 1,86E-71  |      |
| ZNF253    | 12,33136668    | 8,13E-16  |      |
| FXYD3     | 12,31128069    | 1,52E-08  |      |
| ALDH3B2   | 12,2652071     | 1,26E-14  |      |
| FREM2     | 12,0110289     | 1,74E-42  |      |
| ZNF93     | 11,91133862    | 1,04E-14  |      |
| RBBP8NL   | 11,89876632    | 1,73E-14  |      |
| DLX5      | 11,85182118    | 1,66E-14  |      |
| ZNF100    | 11,8094264     | 1,83E-14  |      |
| MAL2      | 11,73008956    | 2,24E-40  |      |
| FAR2      | 11,71831126    | 2,99E-14  |      |
| PLXDC2    | 11,67111965    | 5,53E-14  |      |
| PRDX2     | 11,57218469    | 6,77E-167 |      |
| NCAM2     | 11,49779772    | 3,52E-13  |      |
| SMIM22    | 11,35793171    | 3,62E-13  |      |
| EPHA1     | 11,32788026    | 4,25E-13  |      |
| ZNF429    | 11,30010511    | 3,64E-13  |      |
| BSPRY     | 11,28981192    | 2,14E-13  |      |
| JPH1      | 11,28650522    | 4,75E-12  |      |
| PCP4      | 11,22517096    | 6,42E-13  |      |
| MBNL3     | 11,18423118    | 2,82E-13  |      |
| ESRP1     | 11,1796724     | 4,67E-65  |      |
| ASCL4     | 11,17762107    | 8,26E-13  |      |
| OVOL1     | 11,10960529    | 3,40E-12  |      |
| EFS       | 11,04998154    | 1,72E-12  |      |
| TDRD1     | 11,03233132    | 1,62E-12  |      |
| ILDR1     | 11,02676272    | 1,71E-12  |      |
| GRHL2     | 10,95825971    | 2,36E-33  |      |
| PGR       | 10,84690151    | 7,39E-06  |      |
| DYNC1I1   | 10,79875822    | 2,20E-12  |      |
| FAM3B     | 10,78903026    | 6,60E-12  |      |
| AP4B1-AS1 | 10,75384802    | 8,22E-12  |      |
| COLEC12   | 10,7514003     | 1,54E-11  |      |
| NAALADL2  | 10,73321652    | 1,35E-11  |      |
| TSTD1     | 10,6768621     | 4,21E-12  |      |
| S100A14   | 10,64761245    | 5,17E-65  |      |
| ESRP2     | 10,60179046    | 2,58E-32  |      |
| SPESP1    | 10,59619128    | 3,25E-11  |      |

|           |             |           |
|-----------|-------------|-----------|
| CCDC64B   | 10,57424625 | 3,71E-11  |
| PROM2     | 10,54686299 | 4,16E-08  |
| TMEM125   | 10,53290735 | 2,71E-11  |
| ZNF433    | 10,52293406 | 3,00E-11  |
| ODAM      | 10,45076285 | 4,28E-11  |
| CEACAM21  | 10,4412263  | 4,96E-11  |
| ZNF83     | 10,4347698  | 1,84E-11  |
| TSPEAR    | 10,40768338 | 1,34E-10  |
| PCDHA10   | 10,32226235 | 1,14E-10  |
| ZNF347    | 10,24882037 | 1,98E-10  |
| CDH3      | 10,24492045 | 5,53E-124 |
| SPATC1L   | 10,21405667 | 5,29E-11  |
| HLA-DQB1  | 10,14768265 | 1,17E-08  |
| RNF223    | 10,14166989 | 3,14E-10  |
| ZNF785    | 10,11865613 | 2,72E-10  |
| ZNF682    | 10,07156341 | 3,73E-10  |
| LINC00052 | 10,05833253 | 6,32E-09  |
| C18orf63  | 10,05154707 | 5,76E-10  |
| ERBB4     | 9,965667541 | 1,06E-09  |
| ZNF732    | 9,901721262 | 1,94E-09  |
| BATF      | 9,879758951 | 2,49E-09  |
| ZNF737    | 9,834656474 | 2,69E-17  |
| ZNF681    | 9,823772551 | 3,09E-10  |
| CDKN2B    | 9,823614992 | 2,67E-09  |
| CXCL12    | 9,772918139 | 2,14E-09  |
| ELF5      | 9,769088325 | 1,77E-08  |
| ZNF888    | 9,739908544 | 5,07E-10  |
| ZNF818P   | 9,729028372 | 2,41E-09  |
| LCP1      | 9,708760872 | 1,42E-26  |
| GALNT3    | 9,70494672  | 1,11E-26  |
| MACC1     | 9,688912049 | 2,84E-08  |
| CHST8     | 9,683750692 | 3,04E-09  |
| HLA-DRB1  | 9,662291349 | 1,35E-08  |
| NUP210L   | 9,612554421 | 9,63E-10  |
| BEND5     | 9,571107541 | 7,92E-09  |
| SLC2A10   | 9,560054365 | 7,20E-09  |
| TUBA3E    | 9,551723937 | 1,21E-08  |
| SPINT1    | 9,509444793 | 8,01E-84  |
| ZNF492    | 9,493532896 | 4,81E-08  |
| GUCY1A3   | 9,488880467 | 1,81E-09  |
| SPINK5    | 9,484146943 | 5,15E-08  |
| CBLC      | 9,482769011 | 1,16E-08  |
| ZNF790    | 9,479910883 | 1,36E-08  |
| ACTG2     | 9,47650021  | 1,98E-07  |
| TYRP1     | 9,465833765 | 1,09E-08  |
| PRLR      | 9,44860426  | 4,27E-25  |
| THNSL2    | 9,447244425 | 3,37E-09  |
| SLITRK4   | 9,438807435 | 1,65E-08  |
| MAPK13    | 9,425293645 | 3,85E-55  |
| KIAA1324L | 9,388807667 | 6,27E-25  |



|           |             |          |
|-----------|-------------|----------|
| TMPRSS2   | 9,36377236  | 3,17E-08 |
| ZNF793    | 9,349966905 | 3,34E-09 |
| FUT9      | 9,332148559 | 2,03E-08 |
| DDX43     | 9,319035884 | 3,09E-08 |
| ST14      | 9,316630296 | 1,16E-67 |
| C2orf54   | 9,254875825 | 3,89E-07 |
| PLA2G4F   | 9,251776165 | 1,84E-06 |
| ZNF85     | 9,179045737 | 1,70E-16 |
| ZNF730    | 9,17094468  | 5,52E-08 |
| MARCH1    | 9,166331249 | 9,83E-08 |
| LYPD6B    | 9,164200591 | 5,50E-08 |
| FCGR1A    | 9,152924489 | 3,81E-07 |
| CLDN7     | 9,12765705  | 9,34E-97 |
| HBA1      | 9,114209555 | 1,59E-07 |
| RGS6      | 9,11160318  | 1,24E-07 |
| SYK       | 9,106794427 | 2,54E-23 |
| ZNF137P   | 9,091160297 | 7,95E-08 |
| CNGB3     | 9,065049482 | 1,23E-07 |
| LOC339862 | 9,062887334 | 1,02E-07 |
| SEMA4A    | 9,003356912 | 1,01E-15 |
| LINC00992 | 8,992022302 | 1,49E-07 |
| ZNF876P   | 8,986313291 | 1,32E-07 |
| ACSS3     | 8,983670889 | 7,36E-73 |
| ACTR3C    | 8,978650414 | 1,36E-07 |
| ZNF204P   | 8,9640701   | 1,86E-07 |
| PTCHD2    | 8,962682645 | 8,83E-07 |
| C1orf210  | 8,929573642 | 3,42E-07 |
| FOXP2     | 8,918765776 | 3,31E-07 |
| GSG1L     | 8,91198105  | 2,13E-07 |
| LRRC61    | 8,873485942 | 7,75E-32 |
| LINC01132 | 8,868525622 | 1,52E-06 |
| AMZ1      | 8,838348871 | 6,76E-07 |
| TNFRSF18  | 8,826572342 | 2,90E-06 |
| HTR2C     | 8,820015358 | 3,27E-07 |
| TMEM163   | 8,813256365 | 4,82E-07 |
| KIAA1257  | 8,803220397 | 6,26E-07 |
| AEBP1     | 8,781880523 | 6,49E-07 |
| STAP2     | 8,770479719 | 2,70E-42 |
| KCNMB2-A  | 8,769377342 | 4,10E-07 |
| LOC100288 | 8,76929788  | 4,96E-07 |
| PLA2G3    | 8,756803372 | 3,58E-06 |
| JAM2      | 8,731511772 | 3,34E-06 |
| TMPRSS4   | 8,719267345 | 9,23E-07 |
| CDC42EP5  | 8,717854853 | 5,52E-07 |
| TPTE      | 8,700381588 | 6,98E-07 |
| DNAJA4    | 8,696071679 | 2,99E-20 |
| LOC644915 | 8,687562275 | 1,02E-06 |
| ERG       | 8,68448461  | 6,45E-07 |
| ADAMTS19  | 8,677994105 | 6,92E-07 |
| DSCAM     | 8,675508209 | 1,90E-06 |

|           |             |          |
|-----------|-------------|----------|
| AFF3      | 8,657011209 | 1,01E-06 |
| SEMA3D    | 8,62932204  | 3,23E-06 |
| LINC00664 | 8,625251437 | 2,04E-06 |
| EPPK1     | 8,620669439 | 2,80E-32 |
| C4orf19   | 8,588437573 | 1,30E-06 |
| MTMR7     | 8,574084857 | 1,15E-06 |
| PCDHA6    | 8,556135663 | 7,65E-38 |
| KRTAP5-AS | 8,541633863 | 0,000191 |
| DACH1     | 8,518907637 | 1,50E-06 |
| PAX5      | 8,518213966 | 1,26E-05 |
| KRT17     | 8,50290761  | 8,31E-07 |
| SAMD10    | 8,495123669 | 4,79E-07 |
| FAM81B    | 8,491277455 | 2,52E-06 |
| ZIC4      | 8,464396038 | 2,02E-06 |
| ZNF486    | 8,460311561 | 2,30E-07 |
| PDZRN3    | 8,450499434 | 2,13E-06 |
| ALOX15    | 8,440487764 | 5,38E-15 |
| KDF1      | 8,42491246  | 4,35E-19 |
| RFTN2     | 8,408479654 | 5,10E-06 |
| TMEM132F  | 8,393316481 | 0,000203 |
| FAM83B    | 8,393112138 | 3,70E-25 |
| C5AR2     | 8,380655082 | 5,71E-12 |
| ZNF736    | 8,354177223 | 4,82E-19 |
| SYNE4     | 8,338549821 | 1,55E-06 |
| HLA-DRB5  | 8,334913548 | 6,70E-06 |
| RASL11B   | 8,330938414 | 3,44E-13 |
| NMUR2     | 8,313928667 | 4,40E-06 |
| TCHHL1    | 8,308746194 | 0,000319 |
| ZNF563    | 8,267646706 | 5,36E-06 |
| HPN       | 8,242725734 | 2,19E-12 |
| NODAL     | 8,238767773 | 1,21E-05 |
| ZNF610    | 8,232102299 | 6,51E-06 |
| RAMP1     | 8,199869708 | 1,14E-05 |
| ZNF98     | 8,171776139 | 1,92E-05 |
| HOXD12    | 8,168215722 | 4,60E-05 |
| HS6ST3    | 8,146051609 | 1,17E-05 |
| DNALI1    | 8,135183555 | 1,18E-05 |
| F7        | 8,128493987 | 5,30E-05 |
| BST2      | 8,108503901 | 3,01E-21 |
| MAPK4     | 8,107109971 | 6,76E-06 |
| ZIC1      | 8,10504593  | 1,05E-20 |
| C2CD4D    | 8,097641749 | 1,50E-05 |
| ZNF709    | 8,092340505 | 1,27E-05 |
| TRPS1     | 8,067979948 | 5,09E-17 |
| B3GALNT1  | 8,067570231 | 8,40E-22 |
| TRIL      | 8,053720831 | 2,75E-05 |
| GPR68     | 8,049848995 | 1,74E-05 |
| FLT3      | 8,04129708  | 1,65E-05 |
| TRPV6     | 8,038225858 | 1,78E-05 |
| RENBP     | 8,031831954 | 2,83E-05 |

|           |             |           |
|-----------|-------------|-----------|
| NPAS3     | 8,028116868 | 3,15E-05  |
| CCDC110   | 8,024958438 | 4,10E-05  |
| TMPRSS13  | 8,008894666 | 3,39E-16  |
| FOXI3     | 7,998684963 | 2,30E-05  |
| ADIRF     | 7,990448625 | 3,79E-21  |
| POU6F2    | 7,98359163  | 2,52E-05  |
| GFRA3     | 7,963203278 | 0,0001    |
| RDH16     | 7,957702927 | 1,53E-16  |
| HIST1H3G  | 7,956552419 | 2,64E-05  |
| CDH18     | 7,955065638 | 3,12E-05  |
| GHR       | 7,954923934 | 2,55E-05  |
| ZNF442    | 7,950850984 | 2,51E-05  |
| TTYH1     | 7,923392024 | 0,000144  |
| ZFP2      | 7,919198424 | 6,37E-05  |
| SLIT2     | 7,910641703 | 3,05E-05  |
| ZNF345    | 7,907283357 | 3,14E-05  |
| XKR7      | 7,899483453 | 6,68E-05  |
| CYP1A1    | 7,843074429 | 5,06E-11  |
| VAMP5     | 7,8213863   | 0,000224  |
| ICOS      | 7,815981104 | 5,38E-05  |
| ARL11     | 7,814917018 | 5,32E-05  |
| LOC440461 | 7,81401817  | 0,000119  |
| BARX2     | 7,809457739 | 0,000252  |
| LAD1      | 7,807514084 | 5,80E-103 |
| EMCN      | 7,801230297 | 5,93E-05  |
| TMEM30B   | 7,800130436 | 6,31E-59  |
| LINC00885 | 7,793159707 | 0,000321  |
| HOPX      | 7,791270704 | 0,000265  |
| BEX5      | 7,772639197 | 0,000212  |
| ARHGEF34I | 7,767242843 | 4,86E-06  |
| GNAS-AS1  | 7,750936418 | 6,68E-05  |
| LEF1      | 7,749065909 | 6,69E-92  |
| CHRM1     | 7,726259495 | 8,97E-10  |
| SEPP1     | 7,710620354 | 0,000324  |
| CALML5    | 7,700700032 | 0,000153  |
| SGCG      | 7,69197486  | 0,000236  |
| TLX1NB    | 7,68104446  | 8,88E-05  |
| CBFA2T3   | 7,673801792 | 7,07E-33  |
| LOC101925 | 7,637671746 | 0,000142  |
| ARHGEF38  | 7,636647632 | 0,00015   |
| SPTSSB    | 7,631683273 | 1,77E-26  |
| CAPN9     | 7,621159061 | 0,00015   |
| TFF3      | 7,617133808 | 2,88E-10  |
| DEFB126   | 7,612758432 | 0,000122  |
| ACTL10    | 7,611351406 | 7,65E-06  |
| LRRN1     | 7,608945242 | 9,16E-06  |
| AATBC     | 7,605317577 | 0,000137  |
| FAM109B   | 7,600133304 | 1,55E-10  |
| ZNF441    | 7,592806835 | 0,000335  |
| OXGR1     | 7,584372464 | 0,000197  |

|           |             |           |
|-----------|-------------|-----------|
| LOC100132 | 7,57249996  | 0,000504  |
| KDR       | 7,572400806 | 0,000169  |
| CELF3     | 7,561609831 | 0,000245  |
| NRG3      | 7,534299835 | 1,53E-05  |
| IBSP      | 7,522312632 | 0,000186  |
| GRID2IP   | 7,509961224 | 0,000189  |
| GNG13     | 7,497170312 | 2,47E-05  |
| RASGRF1   | 7,461159018 | 6,33E-31  |
| EDIL3     | 7,460955263 | 0,000807  |
| SAMD12-A' | 7,444510042 | 0,000317  |
| FAM83F    | 7,417324474 | 0,000689  |
| GRIK3     | 7,408737157 | 5,50E-05  |
| PKP1      | 7,371365235 | 2,07E-15  |
| C8orf46   | 7,367596428 | 0,000363  |
| ZNF793-AS | 7,333708463 | 0,000401  |
| CALCR     | 7,330792299 | 3,15E-05  |
| MDK       | 7,329280415 | 8,49E-228 |
| CDYL2     | 7,306026717 | 6,69E-13  |
| MPZL2     | 7,295618508 | 3,57E-12  |
| EPN3      | 7,2826831   | 1,29E-80  |
| SERPINB5  | 7,280236538 | 0,00025   |
| LRFN5     | 7,270260311 | 0,000522  |
| MPPED2    | 7,266708945 | 8,15E-05  |
| PACRG     | 7,239594438 | 0,000618  |
| ENG       | 7,238045033 | 0,000803  |
| SOX11     | 7,232646995 | 0,000685  |
| HS6ST2    | 7,229214726 | 1,76E-35  |
| LRRC2     | 7,214852499 | 0,000862  |
| MALRD1    | 7,212976414 | 1,61E-08  |
| TENM1     | 7,212127908 | 5,72E-05  |
| STMND1    | 7,212103084 | 4,02E-05  |
| LOC103091 | 7,199779518 | 0,000688  |
| OAS2      | 7,198058661 | 0,000315  |
| IZUMO1    | 7,191504247 | 0,000797  |
| HAGLROS   | 7,177359941 | 0,000751  |
| ZNF600    | 7,126512054 | 7,57E-20  |
| ABCB4     | 7,118691368 | 0,000178  |
| RAB17     | 7,11011167  | 1,80E-14  |
| CARD14    | 7,078809261 | 9,44E-05  |
| ZG16B     | 7,07832301  | 4,19E-07  |
| PKIB      | 7,070730183 | 1,89E-72  |
| ENPP5     | 7,070085369 | 4,23E-08  |
| PCDHB3    | 7,05446232  | 3,78E-32  |
| MYRFL     | 7,053231097 | 0,000509  |
| CCL5      | 7,039264703 | 2,75E-06  |
| RTN1      | 6,961328324 | 0,000124  |
| PRSS22    | 6,93865583  | 8,39E-08  |
| TTC29     | 6,91362291  | 0,000123  |
| LRP2      | 6,910383024 | 2,77E-06  |
| PVALB     | 6,877403456 | 0,000299  |

|           |             |           |
|-----------|-------------|-----------|
| ALG1L     | 6,871080414 | 4,51E-20  |
| TUBA3D    | 6,867444483 | 1,97E-07  |
| TFF1      | 6,865682269 | 1,72E-49  |
| DTNA      | 6,847313504 | 8,31E-29  |
| LINC00341 | 6,833344351 | 0,000412  |
| IFITM1    | 6,811160127 | 1,88E-11  |
| IRF6      | 6,801426994 | 1,99E-24  |
| WIF1      | 6,796959046 | 0,000739  |
| C12orf56  | 6,788019918 | 4,81E-11  |
| SLC6A14   | 6,774293991 | 0,000211  |
| ESPN      | 6,732996072 | 7,17E-17  |
| PCDH18    | 6,713099848 | 8,42E-17  |
| TARP      | 6,678649321 | 0,000856  |
| GLDN      | 6,672419746 | 0,000327  |
| PLEKHG6   | 6,664794941 | 1,05E-15  |
| PTPRO     | 6,632778017 | 7,57E-20  |
| INHA      | 6,6303522   | 0,00016   |
| PCDHGA10  | 6,613810193 | 0,000485  |
| SLC1A3    | 6,590804847 | 0,000389  |
| CYP2J2    | 6,57240289  | 1,71E-21  |
| SLC27A3   | 6,559140853 | 4,98E-67  |
| GLI3      | 6,552948611 | 2,22E-18  |
| ZFP69     | 6,547506036 | 2,77E-09  |
| LINC00925 | 6,532813428 | 9,31E-12  |
| YBX2      | 6,515444569 | 8,25E-52  |
| RAB9B     | 6,488122817 | 0,000602  |
| SHISA2    | 6,467103046 | 2,37E-06  |
| TCEA3     | 6,448826413 | 5,85E-58  |
| SPSB4     | 6,435596296 | 4,54E-06  |
| AARD      | 6,430288504 | 1,56E-14  |
| ERC2      | 6,425396772 | 1,46E-09  |
| DNAJC15   | 6,421501319 | 1,54E-66  |
| TDRD5     | 6,39332679  | 3,06E-15  |
| RPRM      | 6,389094704 | 8,63E-06  |
| EPCAM     | 6,377018631 | 2,03E-167 |
| PCDHB9    | 6,373900079 | 2,69E-14  |
| SH3GL3    | 6,356069435 | 3,03E-06  |
| SLC9A4    | 6,335273598 | 4,13E-09  |
| CLIC3     | 6,329227295 | 9,69E-07  |
| LOC148705 | 6,314051121 | 1,59E-08  |
| FIRRE     | 6,28080176  | 9,13E-08  |
| SUSD3     | 6,27383037  | 1,51E-14  |
| ADGRB1    | 6,200154019 | 2,16E-39  |
| BMP7      | 6,184188752 | 2,22E-108 |
| ZNF91     | 6,171995639 | 5,49E-46  |
| C19orf57  | 6,167351559 | 2,18E-05  |
| SLC24A3   | 6,143904596 | 4,19E-13  |
| MCTS2P    | 6,13637906  | 8,62E-24  |
| NRXN3     | 6,134164675 | 1,51E-11  |
| MPP7      | 6,103119652 | 1,18E-55  |

|           |             |           |
|-----------|-------------|-----------|
| ZNF525    | 6,099002372 | 5,05E-42  |
| MARVELD3  | 6,092755173 | 2,16E-32  |
| GADD45G   | 6,079016868 | 1,13E-13  |
| C15orf59  | 6,069454368 | 5,68E-24  |
| MAN1A1    | 6,068593759 | 4,97E-31  |
| TMEM154   | 6,051395481 | 8,28E-07  |
| ASS1      | 6,044900384 | 9,40E-52  |
| B3GALT4   | 6,036186256 | 7,08E-06  |
| DEF6      | 6,031605117 | 9,63E-17  |
| ZNF808    | 6,007533098 | 7,76E-18  |
| ZNF816    | 5,995890587 | 1,62E-21  |
| PCDHB16   | 5,970615944 | 1,70E-30  |
| MYRIP     | 5,965754524 | 2,90E-13  |
| CCM2L     | 5,95157401  | 5,47E-08  |
| PACSIN1   | 5,949095291 | 3,25E-19  |
| SCN4A     | 5,938280394 | 5,34E-12  |
| COL9A2    | 5,934416912 | 8,07E-15  |
| TEX14     | 5,932995707 | 0,000127  |
| CLDN4     | 5,920921972 | 2,67E-60  |
| MFAP2     | 5,919547915 | 1,71E-21  |
| LNX1      | 5,896161085 | 0,000589  |
| PCDHB14   | 5,890687652 | 3,41E-30  |
| SYT7      | 5,871970522 | 2,94E-62  |
| MAFB      | 5,871700811 | 9,03E-23  |
| CDS1      | 5,848730034 | 1,75E-58  |
| PSTPIP2   | 5,848126736 | 1,79E-24  |
| CRISPLD1  | 5,840080017 | 3,49E-22  |
| ZSCAN12P1 | 5,832889491 | 1,47E-12  |
| CRABP2    | 5,826674353 | 1,68E-30  |
| EFEMP1    | 5,797022524 | 4,97E-51  |
| KLHDC7B   | 5,781377452 | 1,90E-10  |
| GATA3     | 5,776426147 | 1,28E-102 |
| CLCA2     | 5,770434805 | 0,000981  |
| TMEM229F  | 5,763737401 | 2,47E-17  |
| NFATC4    | 5,759147193 | 3,96E-10  |
| ZNF117    | 5,75694458  | 9,02E-24  |
| ATP2C2    | 5,74386306  | 8,51E-47  |
| SEMA6A    | 5,734032471 | 1,26E-10  |
| FAM178B   | 5,719694848 | 0,000115  |
| OGDHL     | 5,719548051 | 7,61E-27  |
| HIST1H2BH | 5,715259331 | 0,00012   |
| SMARCA4   | 5,70742558  | 3,08E-116 |
| RORC      | 5,707248179 | 0,000153  |
| ICA1      | 5,707127962 | 5,80E-52  |
| TXNIP     | 5,705164737 | 6,13E-05  |
| PAH       | 5,675742535 | 0,000181  |
| BIK       | 5,652469505 | 7,41E-09  |
| ARHGDIG   | 5,638704936 | 8,05E-27  |
| LPAR2     | 5,634530708 | 2,74E-57  |
| ZBED6CL   | 5,611117664 | 5,12E-10  |

|           |             |          |
|-----------|-------------|----------|
| SECTM1    | 5,610321391 | 2,70E-19 |
| PCDHB13   | 5,599447839 | 3,45E-22 |
| LYPD6     | 5,595760254 | 1,99E-11 |
| PPM1E     | 5,58701164  | 1,78E-20 |
| SAMD12    | 5,577199654 | 1,55E-24 |
| RORA      | 5,576672513 | 1,55E-31 |
| IRX2      | 5,56643445  | 4,58E-38 |
| EPHA6     | 5,553663132 | 7,42E-13 |
| GNG7      | 5,552573557 | 1,05E-08 |
| ARHGEF35  | 5,533251525 | 2,67E-17 |
| SERHL2    | 5,525407507 | 8,06E-05 |
| BMP2      | 5,514819598 | 2,64E-42 |
| KRTCAP3   | 5,494779294 | 1,48E-28 |
| TP73      | 5,486190943 | 3,31E-11 |
| C10orf82  | 5,481940177 | 4,22E-09 |
| AMOT      | 5,479846482 | 2,00E-42 |
| KREMEN2   | 5,463306284 | 5,96E-56 |
| ZNF701    | 5,457880934 | 1,85E-29 |
| ZNF493    | 5,456753268 | 3,94E-09 |
| IGSF5     | 5,452930914 | 2,07E-07 |
| ZMAT1     | 5,452215211 | 0,00041  |
| GATA3-AS1 | 5,435280462 | 0,000529 |
| ZNF468    | 5,416840303 | 2,31E-46 |
| FAM46C    | 5,401532672 | 6,77E-14 |
| PCDHA11   | 5,387866268 | 4,98E-36 |
| BMF       | 5,370544305 | 4,68E-06 |
| PCDHGB7   | 5,369537259 | 0,000673 |
| OVOL2     | 5,357992661 | 7,91E-09 |
| PRDM6     | 5,356139201 | 6,64E-09 |
| DENND2D   | 5,350816163 | 2,46E-54 |
| GPC4      | 5,338294687 | 1,31E-12 |
| LRRC10B   | 5,331171117 | 0,000859 |
| SPDEF     | 5,330018154 | 6,80E-07 |
| BEST1     | 5,317284797 | 0,00059  |
| FAM160A1  | 5,289782832 | 1,01E-06 |
| ELMO3     | 5,270462484 | 5,11E-53 |
| ZNF836    | 5,269009638 | 9,48E-28 |
| C5orf38   | 5,265811835 | 4,20E-24 |
| CCSER1    | 5,261316299 | 0,000688 |
| N4BP3     | 5,259829608 | 3,42E-33 |
| EDAR      | 5,250442537 | 1,72E-05 |
| ZNF440    | 5,233749905 | 6,28E-13 |
| BLNK      | 5,229732928 | 0,000115 |
| LOC102723 | 5,203567545 | 0,000136 |
| PCDHA7    | 5,196685206 | 4,92E-09 |
| SYTL1     | 5,190488409 | 9,98E-31 |
| PCDH1     | 5,183260244 | 2,81E-36 |
| MYT1      | 5,180608033 | 2,25E-10 |
| PCDHA13   | 5,168406282 | 1,82E-06 |
| KCNN2     | 5,16414258  | 2,83E-06 |

|           |             |           |
|-----------|-------------|-----------|
| DLL1      | 5,153937005 | 2,09E-06  |
| TIMP3     | 5,145814019 | 4,89E-12  |
| STARD10   | 5,139347904 | 2,09E-45  |
| LINC00649 | 5,125895933 | 0,000191  |
| RET       | 5,123271367 | 9,66E-13  |
| CNKSRI    | 5,122783386 | 7,93E-15  |
| MSI1      | 5,094031586 | 4,33E-27  |
| IGSF9     | 5,072873907 | 5,56E-62  |
| AIF1L     | 5,055960622 | 1,30E-119 |
| SCX       | 5,051045549 | 8,24E-05  |
| ZNF608    | 5,047423228 | 3,96E-40  |
| SNTB1     | 5,044210249 | 1,35E-61  |
| ABAT      | 5,037055893 | 7,58E-14  |
| FAR2P1    | 5,036413681 | 1,04E-07  |
| ADAMTS17  | 5,031365386 | 1,29E-05  |
| CMYA5     | 5,027073419 | 0,00036   |
| PTPRG-AS1 | 5,009501707 | 1,94E-13  |
| DUSP2     | 5,001344841 | 7,03E-11  |
| CLDN3     | 4,997205832 | 2,54E-94  |
| EGR3      | 4,994333032 | 1,19E-05  |
| REPS2     | 4,99070384  | 1,21E-06  |
| KIAA1324  | 4,984397766 | 1,90E-21  |
| PRR15L    | 4,931968792 | 3,59E-30  |
| COLGALT2  | 4,930403624 | 0,000339  |
| IFI27     | 4,921821682 | 1,21E-05  |
| LINC00665 | 4,92072504  | 4,43E-33  |
| APOA1     | 4,891460919 | 0,000261  |
| CNTNAP2   | 4,889918853 | 3,11E-14  |
| FAM46B    | 4,88803436  | 1,27E-20  |
| FAM83H-A  | 4,876921829 | 5,15E-75  |
| CXCR4     | 4,867005778 | 1,94E-14  |
| HOXC-AS3  | 4,865035624 | 4,49E-07  |
| FRMPD1    | 4,851824618 | 2,94E-06  |
| GUCY1A2   | 4,847074825 | 3,67E-31  |
| MECOM     | 4,845004455 | 8,90E-28  |
| IFITM3    | 4,8200885   | 1,00E-27  |
| CNIH2     | 4,810470697 | 2,36E-17  |
| GLS2      | 4,806486514 | 2,43E-12  |
| IRX4      | 4,798144078 | 9,20E-09  |
| TMEM139   | 4,787336381 | 1,62E-05  |
| TMEM150C  | 4,785630179 | 8,58E-31  |
| FGF12     | 4,776838345 | 4,67E-18  |
| DLX3      | 4,77617894  | 2,36E-31  |
| LOC72873C | 4,760257817 | 0,000148  |
| PCDHB10   | 4,759841689 | 4,26E-07  |
| ANXA9     | 4,747108086 | 4,46E-21  |
| AP3B2     | 4,729971521 | 1,05E-05  |
| SDC2      | 4,727574446 | 2,68E-25  |
| POU3F3    | 4,720000736 | 2,88E-07  |
| GPM6B     | 4,71871808  | 0,000523  |



|           |             |           |
|-----------|-------------|-----------|
| EXPH5     | 4,713207179 | 2,47E-25  |
| KCNU1     | 4,713150893 | 0,000618  |
| IRX3      | 4,694323827 | 6,28E-56  |
| NPY1R     | 4,693879639 | 1,11E-26  |
| PCDH19    | 4,686961676 | 8,49E-05  |
| PGBD5     | 4,662481685 | 2,84E-07  |
| CIART     | 4,657969799 | 1,80E-19  |
| LYPD3     | 4,652451765 | 2,00E-20  |
| SEMA7A    | 4,650591286 | 9,39E-22  |
| MARK1     | 4,624023996 | 0,000285  |
| NDNF      | 4,621262159 | 0,000855  |
| PCDHB8    | 4,591189461 | 1,12E-30  |
| CCDC83    | 4,582804189 | 7,95E-06  |
| ZNF738    | 4,580475989 | 1,50E-15  |
| PCDHB4    | 4,576658232 | 5,68E-06  |
| ANO9      | 4,569303708 | 2,12E-11  |
| TENM4     | 4,558515975 | 3,18E-08  |
| NANOS1    | 4,557269138 | 8,19E-33  |
| PRR36     | 4,551518142 | 4,68E-118 |
| FAAH      | 4,550645608 | 5,56E-28  |
| PTK7      | 4,536419318 | 6,54E-87  |
| FHDC1     | 4,52897571  | 1,24E-12  |
| ZNF790-AS | 4,528369477 | 9,09E-13  |
| GSTO2     | 4,517398771 | 7,92E-39  |
| PIP5K1B   | 4,51649174  | 4,92E-05  |
| DSC2      | 4,504815043 | 3,60E-68  |
| OASL      | 4,504641302 | 0,000708  |
| KCNK15    | 4,497692281 | 1,33E-21  |
| SLC1A2    | 4,484904596 | 2,66E-31  |
| GUCY1B3   | 4,458440976 | 8,40E-05  |
| ENPEP     | 4,447823368 | 1,28E-07  |
| AP1M2     | 4,429050626 | 5,28E-49  |
| DEGS2     | 4,423472645 | 2,10E-11  |
| GDPD3     | 4,421242033 | 1,11E-06  |
| WASF3     | 4,419413473 | 2,25E-08  |
| CHRM3     | 4,417565309 | 7,38E-10  |
| UPK2      | 4,411408044 | 2,21E-06  |
| ENTPD1    | 4,407378321 | 1,56E-10  |
| TRPV4     | 4,390706107 | 1,17E-08  |
| GPR158    | 4,383967675 | 1,82E-09  |
| ZNF165    | 4,382822746 | 5,44E-32  |
| MUC1      | 4,379689796 | 1,01E-13  |
| TMC4      | 4,378400332 | 1,44E-32  |
| DLGAP3    | 4,366705538 | 1,58E-12  |
| NPW       | 4,348117324 | 1,07E-06  |
| LDHD      | 4,346571315 | 5,79E-06  |
| POTEF     | 4,344696395 | 0,000885  |
| FAM227B   | 4,33934069  | 1,90E-13  |
| RUNDC3A-, | 4,339094979 | 3,23E-08  |
| C14orf37  | 4,336180078 | 3,93E-05  |

|          |             |          |
|----------|-------------|----------|
| SNCAIP   | 4,319654608 | 1,41E-06 |
| CGN      | 4,313703097 | 4,63E-27 |
| FAM221A  | 4,295611922 | 6,71E-08 |
| HOXC11   | 4,292147598 | 1,29E-08 |
| ERBB3    | 4,2814789   | 8,83E-83 |
| TMEM45B  | 4,280726636 | 4,79E-21 |
| CPLX1    | 4,267482513 | 8,55E-18 |
| SOCS1    | 4,226145319 | 2,80E-16 |
| ARTN     | 4,22583631  | 2,53E-05 |
| RPS6KL1  | 4,224068313 | 1,67E-20 |
| NIPAL1   | 4,223570373 | 6,71E-07 |
| ERICH2   | 4,214426162 | 2,68E-17 |
| TRIM36   | 4,210215136 | 2,01E-30 |
| SHANK1   | 4,195746407 | 1,72E-05 |
| DDX26B   | 4,177422697 | 1,17E-10 |
| ARRDC4   | 4,170560998 | 1,99E-11 |
| ARMCX1   | 4,167058591 | 0,000161 |
| BNIP1    | 4,163102292 | 5,98E-05 |
| LOXL3    | 4,145040093 | 1,05E-15 |
| GREB1    | 4,144552092 | 4,49E-54 |
| GFRA1    | 4,143632006 | 9,92E-25 |
| RTN4RL1  | 4,128400732 | 1,05E-52 |
| C3orf14  | 4,126933769 | 1,38E-50 |
| NMU      | 4,125414871 | 2,44E-10 |
| PRRG2    | 4,106314836 | 1,26E-10 |
| PCDH7    | 4,097166023 | 1,54E-11 |
| CKMT1B   | 4,095131411 | 5,89E-23 |
| MEF2C    | 4,093316656 | 0,000361 |
| TNFSF13  | 4,092052326 | 2,45E-07 |
| PARP8    | 4,072202529 | 6,09E-14 |
| LOXL1    | 4,072052731 | 1,45E-07 |
| BDH1     | 4,064577007 | 3,60E-58 |
| ZNF391   | 4,059756697 | 1,08E-09 |
| GRAMD3   | 4,051262496 | 2,86E-16 |
| PPL      | 4,042232789 | 1,34E-33 |
| BCAS1    | 4,039722132 | 3,58E-06 |
| SNAR-E   | 4,010549659 | 0,000411 |
| LIN7A    | 4,004782362 | 5,58E-26 |
| SIAH2    | 3,993929674 | 4,24E-49 |
| SLC15A2  | 3,992939193 | 1,01E-05 |
| GJB2     | 3,987166281 | 5,92E-12 |
| ZNF616   | 3,984561394 | 1,37E-38 |
| LAMP3    | 3,976949563 | 5,39E-07 |
| NUPR1    | 3,966466825 | 0,000386 |
| PAX8-AS1 | 3,965252367 | 1,62E-12 |
| CDK14    | 3,956422981 | 2,13E-05 |
| HOXC10   | 3,953105767 | 9,79E-47 |
| WNT6     | 3,952213668 | 9,91E-05 |
| FUT1     | 3,945369637 | 1,33E-06 |
| LSR      | 3,940984454 | 7,39E-44 |

|            |             |          |
|------------|-------------|----------|
| SBK1       | 3,933955311 | 4,79E-63 |
| GRHL1      | 3,924327405 | 1,93E-16 |
| GLUL       | 3,919342765 | 1,35E-28 |
| CDH1       | 3,905117718 | 4,10E-64 |
| SH3BGR     | 3,903970758 | 9,69E-10 |
| FBXL16     | 3,897396633 | 5,50E-17 |
| BEX4       | 3,892726409 | 6,78E-05 |
| PCBP3      | 3,886635021 | 1,29E-11 |
| CRLF1      | 3,882929453 | 3,62E-07 |
| SYT12      | 3,879739534 | 1,15E-17 |
| ASCL1      | 3,837626721 | 4,42E-09 |
| STC1       | 3,836429433 | 1,60E-30 |
| ACE        | 3,829838015 | 0,000384 |
| TRIM2      | 3,82721153  | 4,50E-16 |
| QPRT       | 3,82716319  | 1,98E-13 |
| ACKR3      | 3,82514454  | 8,35E-46 |
| RNF208     | 3,814024905 | 2,14E-19 |
| TNFAIP8L3  | 3,806091648 | 8,30E-14 |
| IL17RE     | 3,795336081 | 2,86E-07 |
| CRACR2B    | 3,776206992 | 5,15E-23 |
| LOC100996  | 3,768428478 | 2,70E-08 |
| HSPB8      | 3,754206095 | 8,30E-23 |
| GALNT16    | 3,752563718 | 1,36E-06 |
| MPZL3      | 3,750017186 | 1,93E-16 |
| GYLTL1B    | 3,742572224 | 1,14E-30 |
| SLC37A1    | 3,739374349 | 8,08E-16 |
| AIM1       | 3,735130785 | 1,07E-17 |
| KRTAP3-1   | 3,727938956 | 5,39E-08 |
| ARHGEF5    | 3,72245082  | 1,09E-21 |
| KCNH2      | 3,72183225  | 6,89E-17 |
| RNF125     | 3,714773237 | 6,12E-06 |
| ZNF829     | 3,709699598 | 2,08E-17 |
| DHRS2      | 3,706801444 | 4,19E-16 |
| ZNF718     | 3,705410438 | 7,50E-19 |
| KCNC3      | 3,697428039 | 4,28E-27 |
| MMP11      | 3,688084169 | 8,76E-06 |
| HOTAIR     | 3,676098714 | 0,00012  |
| IFI30      | 3,675709455 | 2,22E-28 |
| ISG15      | 3,672052552 | 8,28E-06 |
| UNC5A      | 3,66793285  | 0,000885 |
| ANKRD34A   | 3,666002996 | 4,57E-16 |
| KLC3       | 3,663169036 | 3,55E-05 |
| IFIH1      | 3,660706747 | 7,52E-08 |
| IGFBP5     | 3,648680451 | 1,72E-17 |
| ETNK2      | 3,639555605 | 3,49E-16 |
| HOOK2      | 3,632938995 | 3,63E-58 |
| PRICKLE2-A | 3,618682874 | 0,000109 |
| DLG3       | 3,607228977 | 7,07E-44 |
| ZNF467     | 3,605886339 | 8,55E-27 |
| HOOK1      | 3,6027988   | 1,28E-27 |

|            |             |          |
|------------|-------------|----------|
| VIPR1      | 3,59174282  | 1,45E-05 |
| SP6        | 3,590172692 | 6,31E-14 |
| TGM1       | 3,585087254 | 0,000684 |
| HID1       | 3,579169221 | 2,14E-18 |
| GJA3       | 3,561266401 | 1,68E-09 |
| IRX5       | 3,557846914 | 3,59E-24 |
| SULF2      | 3,556889393 | 2,53E-35 |
| GPR37L1    | 3,551974524 | 0,000658 |
| KCNJ8      | 3,547483322 | 7,82E-34 |
| ADGRV1     | 3,539949841 | 1,41E-07 |
| ARVCF      | 3,538022603 | 7,55E-31 |
| LINC01389  | 3,535512904 | 0,00073  |
| TJP3       | 3,526879457 | 2,03E-08 |
| LOC729737  | 3,515610545 | 0,000347 |
| TBC1D30    | 3,505730393 | 6,59E-40 |
| FLJ23867   | 3,496501234 | 2,01E-21 |
| ARG2       | 3,494718499 | 1,49E-12 |
| PDE5A      | 3,492061084 | 3,82E-06 |
| PSMD6      | 3,486575728 | 4,61E-57 |
| CEL        | 3,483922882 | 0,000361 |
| TJP2       | 3,483053847 | 5,56E-21 |
| KRT23      | 3,481700964 | 2,67E-05 |
| ZNF43      | 3,476039486 | 1,48E-39 |
| CHGA       | 3,470913768 | 7,29E-14 |
| PDGFB      | 3,468314051 | 9,28E-11 |
| CKMT1A     | 3,460311105 | 1,30E-23 |
| XBP1       | 3,459393925 | 2,77E-17 |
| FAM84B     | 3,456803643 | 3,36E-18 |
| IDH2       | 3,456584968 | 5,91E-46 |
| ATP6V1C2   | 3,455952653 | 1,35E-13 |
| SH3YL1     | 3,454099411 | 4,68E-34 |
| SLC44A2    | 3,452321569 | 7,01E-53 |
| PDE4DIP    | 3,449267762 | 1,09E-24 |
| BRIP1      | 3,447050662 | 2,25E-59 |
| MB         | 3,446419539 | 1,11E-17 |
| ABLIM2     | 3,431906468 | 1,36E-05 |
| SOWAHB     | 3,413419381 | 0,000355 |
| TINCR      | 3,411423707 | 9,27E-09 |
| TMEM191    | 3,396892746 | 3,54E-20 |
| LOC389834  | 3,385744641 | 1,74E-07 |
| KCNIP3     | 3,370818668 | 8,85E-08 |
| AGAP2      | 3,369331292 | 7,91E-18 |
| TFAP2C     | 3,361847755 | 3,49E-41 |
| FGD3       | 3,339430989 | 1,72E-08 |
| SLC26A4-A' | 3,33780832  | 0,00022  |
| GALNT6     | 3,331929834 | 2,75E-19 |
| ITPKB      | 3,331447018 | 1,04E-21 |
| DDAH2      | 3,327653165 | 2,29E-35 |
| CDK18      | 3,325447948 | 1,51E-13 |
| ZNF311     | 3,317658326 | 1,09E-05 |

|           |             |          |
|-----------|-------------|----------|
| VGf       | 3,308826383 | 1,64E-15 |
| C6orf132  | 3,306070346 | 2,90E-30 |
| EMID1     | 3,302924388 | 4,52E-06 |
| KIAA0040  | 3,301036085 | 2,02E-13 |
| KCNK6     | 3,296231426 | 1,31E-10 |
| ASCL5     | 3,293576788 | 0,000287 |
| HMHA1     | 3,293310513 | 2,08E-12 |
| PLEKHF2   | 3,284719718 | 6,58E-44 |
| ZNF596    | 3,273781089 | 1,14E-06 |
| SHISA9    | 3,269461363 | 1,09E-09 |
| FRAT1     | 3,268138586 | 0,000179 |
| PRIMA1    | 3,262025823 | 8,03E-06 |
| KNDC1     | 3,255926119 | 6,06E-07 |
| USP32     | 3,253688782 | 7,78E-28 |
| RGS16     | 3,249190434 | 1,05E-06 |
| NYNRIN    | 3,243143929 | 0,000252 |
| TMEM198   | 3,242926293 | 2,11E-06 |
| RND2      | 3,242765011 | 4,38E-12 |
| IFI6      | 3,235243938 | 6,61E-06 |
| CD8A      | 3,228946123 | 3,67E-07 |
| ARHGEF16  | 3,221109901 | 1,08E-20 |
| WNT11     | 3,210263087 | 8,65E-06 |
| PGM5      | 3,206105972 | 0,000306 |
| APPBP2    | 3,205771024 | 4,88E-67 |
| ZNF813    | 3,205438074 | 4,77E-14 |
| ZNF850    | 3,203855721 | 1,39E-06 |
| ZNF28     | 3,202488395 | 4,18E-09 |
| GSTM3     | 3,202176508 | 3,90E-12 |
| MAPT      | 3,202150936 | 1,99E-20 |
| LOC104968 | 3,195916211 | 1,95E-08 |
| ASAH2     | 3,192193409 | 1,71E-14 |
| GAD1      | 3,191092918 | 7,52E-13 |
| PRPH      | 3,185711453 | 6,56E-06 |
| LINC00886 | 3,18394509  | 5,10E-07 |
| MYO1D     | 3,182347219 | 6,62E-22 |
| RNF144B   | 3,180082786 | 1,56E-05 |
| RASD1     | 3,179779299 | 0,000231 |
| LINC01006 | 3,17527942  | 0,000762 |
| GCNT1     | 3,174992324 | 2,39E-20 |
| PIK3R3    | 3,168966541 | 2,15E-20 |
| HIC1      | 3,16892032  | 4,04E-05 |
| PRRT4     | 3,167464232 | 0,000938 |
| ERV3-1    | 3,163752403 | 3,13E-21 |
| TGIF2     | 3,159193049 | 1,50E-22 |
| GMPR      | 3,156017869 | 0,000361 |
| ANK3      | 3,155414414 | 6,79E-23 |
| RAP1GAP2  | 3,155201396 | 5,62E-18 |
| CSTA      | 3,153870022 | 7,28E-06 |
| EFNA1     | 3,150679223 | 2,92E-12 |
| BCAS2     | 3,1492152   | 4,88E-63 |

|           |             |          |
|-----------|-------------|----------|
| PLEKHO1   | 3,139593012 | 1,72E-24 |
| NSUN7     | 3,135652193 | 4,69E-08 |
| TRIM37    | 3,126424028 | 5,37E-67 |
| ARHGAP4   | 3,116490889 | 1,17E-05 |
| WNT5A     | 3,110090063 | 3,84E-14 |
| SULT1A1   | 3,100710482 | 8,82E-06 |
| SDK1      | 3,100099122 | 1,95E-07 |
| PARD6B    | 3,09982801  | 6,74E-43 |
| RNF182    | 3,092850914 | 1,52E-08 |
| EN2       | 3,09261165  | 1,13E-05 |
| ZNF700    | 3,092496824 | 1,49E-08 |
| SH3BP2    | 3,087453429 | 6,07E-09 |
| DENND2C   | 3,082621365 | 0,000211 |
| CCDC170   | 3,082492832 | 1,73E-07 |
| TLE2      | 3,070164415 | 9,86E-28 |
| EEF1A2    | 3,069776355 | 3,07E-26 |
| PPIC      | 3,06682397  | 1,50E-30 |
| KLHDC9    | 3,065885734 | 3,02E-05 |
| NEB       | 3,050323495 | 2,63E-16 |
| SH3D21    | 3,043339396 | 0,000127 |
| SLC8A1    | 3,036345957 | 5,41E-10 |
| ATAD3B    | 3,035304827 | 2,31E-08 |
| NXPH4     | 3,030655546 | 6,74E-12 |
| SIDT1     | 3,020383002 | 5,69E-09 |
| CSDE1     | 3,01693793  | 4,42E-40 |
| IPO5P1    | 3,016806752 | 6,07E-09 |
| AIM1L     | 3,01519276  | 0,000198 |
| CAMK2B    | 3,008526233 | 6,98E-08 |
| ZNF695    | 3,003252236 | 7,72E-05 |
| KRT19     | 2,991845031 | 8,50E-18 |
| MARVELD2  | 2,984697056 | 1,07E-23 |
| GPR160    | 2,97737938  | 5,91E-11 |
| PLEKHB1   | 2,974658564 | 1,14E-07 |
| TSPAN13   | 2,964132227 | 5,18E-30 |
| TNK1      | 2,96390386  | 2,15E-19 |
| ZNF572    | 2,959656002 | 1,15E-07 |
| CXXC4     | 2,959349309 | 5,17E-05 |
| GRTP1     | 2,946842123 | 2,69E-13 |
| KCNQ1OT1  | 2,931956676 | 3,91E-05 |
| TMEM254-  | 2,922861091 | 8,67E-05 |
| CAMK2N2   | 2,922760121 | 1,93E-11 |
| HSD11B2   | 2,922404245 | 2,09E-08 |
| INSIG1    | 2,918713404 | 3,78E-16 |
| LNX2      | 2,916469963 | 1,06E-39 |
| LINC00959 | 2,911802724 | 9,66E-05 |
| VAMP8     | 2,910816181 | 9,33E-11 |
| LRRC26    | 2,910741923 | 3,78E-09 |
| KCNJ3     | 2,908141197 | 0,000113 |
| RGMA      | 2,907067621 | 7,26E-10 |
| PPM1D     | 2,904269698 | 9,96E-34 |

|           |             |          |
|-----------|-------------|----------|
| RPS6KA2   | 2,904099026 | 0,000274 |
| FOXA1     | 2,903597295 | 7,07E-53 |
| C1orf233  | 2,903287223 | 1,73E-22 |
| CTXN1     | 2,903247528 | 3,95E-31 |
| PITPNM3   | 2,902264408 | 1,31E-09 |
| GAL       | 2,896223114 | 1,47E-14 |
| ADM2      | 2,893413529 | 0,000126 |
| RHOD      | 2,892597262 | 1,04E-12 |
| HCN4      | 2,892277509 | 3,15E-09 |
| OXCT1     | 2,889995769 | 6,25E-18 |
| MMP16     | 2,88865668  | 3,43E-05 |
| REEP1     | 2,886748499 | 0,000708 |
| METRNL    | 2,88028653  | 8,61E-21 |
| PFDN4     | 2,871364217 | 3,87E-49 |
| DCLK1     | 2,870575477 | 3,18E-21 |
| PTK6      | 2,865289805 | 5,48E-06 |
| FAM117A   | 2,863631944 | 1,40E-15 |
| MEX3A     | 2,859659448 | 4,98E-55 |
| KCNMB4    | 2,858163525 | 0,000712 |
| CCDC149   | 2,856789425 | 4,73E-15 |
| ADAMTS13  | 2,853196257 | 0,00011  |
| ZNF354A   | 2,84987555  | 1,35E-17 |
| HOMER2    | 2,840127853 | 1,19E-27 |
| C1orf226  | 2,839733618 | 9,54E-08 |
| RGL2      | 2,836396723 | 4,56E-25 |
| LOC283335 | 2,835152309 | 8,23E-13 |
| MAPK8IP2  | 2,831491804 | 6,51E-07 |
| NDC80     | 2,826785941 | 4,59E-13 |
| JHDM1D-A  | 2,820976028 | 1,42E-10 |
| PCAT7     | 2,820910418 | 3,81E-05 |
| PLXNA4    | 2,81901736  | 1,33E-06 |
| ARHGEF19  | 2,816044027 | 1,17E-15 |
| MYLIP     | 2,815188517 | 4,81E-17 |
| FRAT2     | 2,814420706 | 4,28E-11 |
| DTWD1     | 2,809252208 | 7,28E-19 |
| HENMT1    | 2,808228544 | 6,97E-20 |
| SERTAD4   | 2,800568169 | 2,02E-11 |
| CYB561    | 2,800284763 | 5,96E-56 |
| MPC1      | 2,799389571 | 3,41E-10 |
| MSRB2     | 2,795633189 | 4,31E-26 |
| SIX4      | 2,795160085 | 1,05E-13 |
| RIC3      | 2,795022104 | 0,000201 |
| CRMP1     | 2,79388554  | 2,29E-12 |
| NOTCH3    | 2,791442507 | 1,49E-32 |
| ZNF425    | 2,789222349 | 5,17E-12 |
| SH3BP5    | 2,78653604  | 5,98E-39 |
| PAIP2B    | 2,783726285 | 5,09E-13 |
| ENPP4     | 2,782237768 | 4,77E-07 |
| CAMSAP3   | 2,775636783 | 1,96E-31 |
| PPDPF     | 2,770431647 | 8,28E-36 |

|            |             |          |
|------------|-------------|----------|
| LINC00858  | 2,768108891 | 0,000775 |
| SEMA3F     | 2,767986674 | 7,36E-18 |
| ADGRL1     | 2,759064828 | 3,82E-38 |
| PLCB1      | 2,758629265 | 2,69E-13 |
| SIKE1      | 2,744055739 | 1,74E-42 |
| P2RY2      | 2,743243828 | 2,31E-14 |
| JUP        | 2,74298681  | 5,60E-14 |
| TEAD3      | 2,739013695 | 2,58E-20 |
| HES2       | 2,732358527 | 0,000506 |
| EFHD1      | 2,732222672 | 7,02E-10 |
| RASGEF1A   | 2,718467824 | 9,41E-14 |
| BCAS3      | 2,716843938 | 9,08E-24 |
| NIPAL2     | 2,710676064 | 4,01E-10 |
| RHOB       | 2,709061203 | 6,22E-24 |
| PAQR8      | 2,704965578 | 1,57E-09 |
| PTP4A3     | 2,702129798 | 1,38E-15 |
| CBS        | 2,701623379 | 1,43E-12 |
| GPR27      | 2,701257575 | 4,65E-05 |
| C2orf15    | 2,698128281 | 1,26E-08 |
| TM7SF2     | 2,695994196 | 1,62E-10 |
| STON2      | 2,694974411 | 2,04E-24 |
| CPE        | 2,692092185 | 8,26E-08 |
| GSTM4      | 2,687842253 | 1,19E-27 |
| FAM171A2   | 2,687326704 | 2,91E-14 |
| SLC29A2    | 2,687020741 | 2,83E-17 |
| FRMD6-AS1  | 2,681496177 | 0,0005   |
| CREB3L4    | 2,675197227 | 1,16E-19 |
| ASCL2      | 2,668206393 | 5,01E-08 |
| CALHM2     | 2,665957015 | 6,91E-08 |
| SMPDL3B    | 2,664846897 | 4,12E-13 |
| CACNA1D    | 2,659965322 | 4,22E-10 |
| DHCR24     | 2,658043024 | 3,95E-19 |
| PCLO       | 2,655012757 | 6,89E-17 |
| ADAM22     | 2,652630524 | 1,16E-17 |
| ALDOC      | 2,647417276 | 1,97E-11 |
| GCAT       | 2,64272333  | 7,37E-12 |
| PVRL4      | 2,638088855 | 5,78E-18 |
| KATNAL2    | 2,637430606 | 5,47E-06 |
| GPNMB      | 2,63690342  | 1,52E-05 |
| RTN4R      | 2,63288772  | 5,07E-08 |
| YIPF2      | 2,630901521 | 1,13E-25 |
| NPL        | 2,629719951 | 3,83E-08 |
| ADGRG1     | 2,62727411  | 1,48E-20 |
| ZNF561-AS1 | 2,626111666 | 0,000284 |
| NRAS       | 2,620314488 | 4,42E-33 |
| FAM174B    | 2,618801776 | 3,08E-08 |
| OAZ3       | 2,615962857 | 0,000288 |
| TRIM33     | 2,613884523 | 3,38E-36 |
| FRMD6      | 2,607337706 | 1,40E-22 |
| DCLRE1B    | 2,606150023 | 3,74E-23 |



|           |             |          |
|-----------|-------------|----------|
| ALDH6A1   | 2,602985358 | 5,21E-16 |
| STARD13   | 2,602151644 | 4,10E-13 |
| OLFM1     | 2,590436411 | 1,61E-18 |
| MYB       | 2,586352457 | 0,00023  |
| PARP10    | 2,581158948 | 0,000426 |
| AK7       | 2,57662642  | 6,74E-20 |
| COL9A3    | 2,574454156 | 0,000558 |
| CASKIN1   | 2,569002923 | 3,32E-10 |
| TENM3     | 2,565113702 | 1,12E-20 |
| SLC16A14  | 2,562004599 | 0,000163 |
| DAAM1     | 2,560887344 | 9,30E-25 |
| BCL2      | 2,560824222 | 6,66E-06 |
| ACOX3     | 2,552381837 | 5,22E-14 |
| RUNX2     | 2,55238131  | 3,56E-20 |
| B3GNT4    | 2,549633769 | 7,73E-05 |
| SLC7A8    | 2,549338687 | 1,34E-08 |
| THOC7     | 2,546353607 | 7,16E-37 |
| ARSG      | 2,541425059 | 8,59E-10 |
| ZNF554    | 2,539807958 | 0,000122 |
| BCL11B    | 2,53695102  | 1,37E-22 |
| ACBD7     | 2,530223659 | 3,72E-07 |
| HUNK      | 2,524575682 | 1,90E-18 |
| GPR153    | 2,524312729 | 1,34E-08 |
| DIRAS1    | 2,52373788  | 4,21E-17 |
| DUSP9     | 2,513553335 | 6,59E-05 |
| ABCD1     | 2,512648655 | 1,05E-06 |
| TUBD1     | 2,498643025 | 1,34E-15 |
| ZFP3      | 2,498109849 | 2,00E-15 |
| ABHD11    | 2,490505602 | 7,50E-20 |
| SP140L    | 2,485862808 | 3,02E-09 |
| PITPNC1   | 2,478874605 | 2,02E-30 |
| PLXNB3    | 2,478815395 | 6,22E-10 |
| TGFBR3L   | 2,475517354 | 5,85E-05 |
| KIAA1217  | 2,462423558 | 3,58E-05 |
| SLC12A8   | 2,453652151 | 4,00E-07 |
| RNASEH2A  | 2,45354608  | 2,88E-32 |
| CCNG2     | 2,450252805 | 5,37E-07 |
| TLE3      | 2,449518445 | 7,57E-21 |
| CDC42BPG  | 2,449129755 | 5,20E-10 |
| ZNF138    | 2,448653216 | 3,40E-17 |
| ZBTB42    | 2,448547064 | 2,21E-19 |
| GPR89B    | 2,447809995 | 1,59E-06 |
| NTN1      | 2,446021879 | 0,00022  |
| NUDT12    | 2,440638235 | 4,79E-11 |
| ZNF630    | 2,437536848 | 2,36E-05 |
| MYO5C     | 2,436725547 | 7,32E-22 |
| GTF2IRD2B | 2,435301555 | 1,65E-11 |
| DDR1      | 2,42858223  | 2,45E-09 |
| ARAP2     | 2,428402275 | 2,27E-05 |
| ARID5B    | 2,427301919 | 1,38E-22 |

|          |             |          |
|----------|-------------|----------|
| LFNG     | 2,416636696 | 9,94E-09 |
| ZHX2     | 2,414562837 | 4,88E-19 |
| BAIAP3   | 2,412182221 | 0,000655 |
| PDZD4    | 2,409898461 | 1,45E-06 |
| DUSP8    | 2,409571238 | 8,20E-05 |
| MYH14    | 2,405892964 | 6,91E-10 |
| TBC1D9   | 2,402117949 | 1,32E-23 |
| SOX13    | 2,389643373 | 1,76E-09 |
| ZFYVE28  | 2,386540448 | 1,37E-09 |
| ZNF860   | 2,381123163 | 0,000848 |
| CASZ1    | 2,378058575 | 1,48E-09 |
| ATXN7L2  | 2,377734706 | 2,26E-09 |
| ZNF704   | 2,37066693  | 8,94E-16 |
| HBP1     | 2,369118921 | 5,12E-08 |
| IL17RB   | 2,368516657 | 1,70E-05 |
| GCH1     | 2,365381244 | 2,60E-14 |
| RHOV     | 2,362682747 | 1,48E-07 |
| PLEKHH1  | 2,355451483 | 1,73E-22 |
| FAM129A  | 2,355111155 | 0,000306 |
| MACROD1  | 2,345849637 | 1,78E-07 |
| FIBCD1   | 2,34547124  | 0,000448 |
| KLHDC3   | 2,344216135 | 6,33E-18 |
| LOC81691 | 2,343204833 | 2,88E-06 |
| ZNF217   | 2,342334387 | 5,64E-26 |
| ZNF595   | 2,332518587 | 8,53E-12 |
| ZNF490   | 2,330861512 | 9,84E-09 |
| GATSL3   | 2,327007019 | 0,000961 |
| RIMS4    | 2,322252578 | 3,91E-05 |
| SLC50A1  | 2,321382013 | 3,15E-23 |
| RNASEL   | 2,320298372 | 3,69E-10 |
| SLC22A23 | 2,317811602 | 1,38E-20 |
| ZBTB12   | 2,317361141 | 8,79E-07 |
| CCDC71L  | 2,316594092 | 8,49E-08 |
| LINGO1   | 2,315011913 | 1,03E-09 |
| GABPB2   | 2,309359235 | 5,23E-11 |
| ZNF708   | 2,308041288 | 1,24E-07 |
| PHLPP1   | 2,304492343 | 1,07E-15 |
| L1CAM    | 2,304125257 | 1,87E-08 |
| RAB3IP   | 2,303826774 | 2,07E-27 |
| ZNF184   | 2,302423814 | 1,90E-18 |
| CRIP2    | 2,301973125 | 5,71E-20 |
| LYRM9    | 2,29277629  | 0,000409 |
| FUOM     | 2,290891367 | 8,39E-08 |
| ZNF44    | 2,286279158 | 2,90E-06 |
| SFXN2    | 2,282294631 | 1,69E-15 |
| DSP      | 2,274810511 | 9,44E-29 |
| TMCO4    | 2,271363581 | 4,68E-10 |
| RHOBTB1  | 2,269336323 | 3,72E-31 |
| ZNF443   | 2,2644221   | 4,17E-08 |
| RSBN1    | 2,259239491 | 5,46E-17 |

|           |             |          |
|-----------|-------------|----------|
| MCM3AP-/  | 2,253761027 | 2,44E-09 |
| GPX4      | 2,253655753 | 1,14E-37 |
| CCDC183-A | 2,253595146 | 7,13E-05 |
| RRBP1     | 2,249376168 | 8,67E-14 |
| LINC00960 | 2,248486967 | 0,000244 |
| RAB30     | 2,246267626 | 3,06E-09 |
| NAPG      | 2,24046019  | 1,70E-14 |
| NRXN2     | 2,237644259 | 3,87E-09 |
| HIPK1     | 2,236853196 | 4,29E-25 |
| DNMT3B    | 2,234869127 | 2,00E-19 |
| MTIF3     | 2,23431439  | 3,44E-14 |
| FZD1      | 2,233793601 | 1,61E-15 |
| WDR83OS   | 2,233115399 | 1,63E-28 |
| ZFP62     | 2,232970408 | 4,86E-26 |
| JPH3      | 2,23223697  | 7,71E-05 |
| EFNB3     | 2,229144445 | 2,69E-07 |
| ZNF841    | 2,226982298 | 1,52E-07 |
| ZC3H6     | 2,223676981 | 2,44E-07 |
| ZNF611    | 2,222250631 | 4,13E-09 |
| RAD51C    | 2,221983567 | 3,85E-31 |
| RPS6KB1   | 2,220048311 | 1,68E-35 |
| TXNDC16   | 2,218129954 | 4,11E-06 |
| LRRC37A3  | 2,21533081  | 5,63E-07 |
| TBC1D10A  | 2,214136377 | 4,05E-10 |
| TRIP6     | 2,209635395 | 9,72E-27 |
| PPP1R13B  | 2,209595264 | 5,55E-15 |
| ZNF703    | 2,208890346 | 1,80E-23 |
| C9orf152  | 2,208041702 | 0,000652 |
| DNASE2    | 2,201706786 | 1,63E-23 |
| RCOR2     | 2,199485734 | 4,21E-05 |
| TMOD2     | 2,195749595 | 1,76E-06 |
| NKAIN1    | 2,194779435 | 4,54E-11 |
| FBXO27    | 2,189034305 | 1,34E-11 |
| FIS1      | 2,188814195 | 3,46E-18 |
| CRISPLD2  | 2,186579322 | 2,55E-06 |
| FAM43A    | 2,185513373 | 1,11E-07 |
| DBN1      | 2,181449386 | 4,17E-30 |
| SYNPO2    | 2,172876894 | 7,83E-06 |
| SLC7A5    | 2,168983713 | 4,97E-09 |
| SLC25A29  | 2,168827275 | 3,79E-19 |
| TTC9      | 2,168520974 | 8,70E-17 |
| MAPK11    | 2,16590107  | 8,16E-07 |
| PRDM4     | 2,161143922 | 4,34E-34 |
| BAMBI     | 2,158932512 | 1,50E-32 |
| MEPCE     | 2,152031404 | 1,76E-34 |
| PRKCH     | 2,15202524  | 3,92E-08 |
| ATP1A1-AS | 2,151516561 | 1,83E-06 |
| RANBP17   | 2,147214203 | 1,82E-07 |
| PAQR4     | 2,14612525  | 1,23E-28 |
| DLG1      | 2,145991328 | 7,00E-23 |

|           |             |          |
|-----------|-------------|----------|
| ZNF783    | 2,142881863 | 3,78E-10 |
| HEATR6    | 2,132466161 | 6,95E-24 |
| ZNF837    | 2,125563104 | 0,000146 |
| KANSL1L   | 2,117189542 | 1,45E-07 |
| LOC11323C | 2,115967785 | 5,66E-09 |
| GABPB1    | 2,115031013 | 1,65E-14 |
| ABCA11P   | 2,111969928 | 0,000138 |
| C6orf48   | 2,111520247 | 6,71E-07 |
| MMAB      | 2,109691633 | 1,43E-24 |
| TEX19     | 2,108895125 | 0,00022  |
| ZBTB22    | 2,104066254 | 3,45E-11 |
| HMG1      | 2,103774151 | 2,31E-29 |
| FHIT      | 2,101193335 | 0,000206 |
| KIF26A    | 2,100951579 | 1,78E-06 |
| TAF11     | 2,100473705 | 3,72E-20 |
| SALL4     | 2,096687044 | 0,000255 |
| KDM7A     | 2,095612472 | 4,76E-06 |
| ZNF879    | 2,095004365 | 0,000948 |
| ZNF519    | 2,093648346 | 2,00E-06 |
| ZNF385A   | 2,090020909 | 6,62E-21 |
| EZH2      | 2,089109422 | 1,05E-10 |
| TDRKH     | 2,087679123 | 1,73E-06 |
| COX6C     | 2,085412195 | 2,81E-23 |
| SPTBN2    | 2,083056186 | 4,20E-13 |
| N6AMT2    | 2,081954756 | 1,15E-06 |
| TMEM178E  | 2,078698292 | 2,51E-07 |
| MGMT      | 2,074830895 | 2,43E-10 |
| PDCD4     | 2,071592163 | 2,46E-13 |
| FBXW9     | 2,071480927 | 2,10E-13 |
| ZNF107    | 2,068080672 | 2,07E-17 |
| WDR83     | 2,064433584 | 4,03E-10 |
| RAB3D     | 2,064303089 | 1,04E-11 |
| P2RX4     | 2,064177818 | 6,60E-17 |
| C2CD2L    | 2,06053894  | 1,20E-07 |
| DHRS13    | 2,060537405 | 2,09E-09 |
| FRMD4A    | 2,056433216 | 1,51E-06 |
| KIF1A     | 2,053816557 | 1,86E-11 |
| TMEM54    | 2,053466349 | 7,41E-17 |
| TEF       | 2,052883502 | 4,65E-07 |
| ZNF239    | 2,049958017 | 0,000191 |
| MED12L    | 2,04593598  | 4,99E-05 |
| MYL12B    | 2,045172989 | 4,09E-29 |
| MVD       | 2,044283959 | 8,89E-08 |
| LMX1B     | 2,040919081 | 7,41E-06 |
| VPS52     | 2,040760932 | 3,31E-26 |
| PSRC1     | 2,040519404 | 7,10E-11 |
| TNNT1     | 2,035718485 | 2,06E-19 |
| F11R      | 2,034162983 | 2,20E-19 |
| XYLT1     | 2,027649688 | 1,34E-05 |
| ADAP1     | 2,027266626 | 0,000146 |

|           |             |          |
|-----------|-------------|----------|
| FAM102B   | 2,025864673 | 6,96E-17 |
| CCZ1B     | 2,02584136  | 1,16E-15 |
| ETS2      | 2,022973062 | 8,04E-16 |
| FAM127C   | 2,020509669 | 3,60E-15 |
| F12       | 2,019860239 | 2,82E-19 |
| DFNB31    | 2,019167269 | 6,15E-08 |
| FAM214A   | 2,018631693 | 0,000148 |
| TMEM184   | 2,016751226 | 1,39E-06 |
| TC2N      | 2,015533913 | 1,53E-08 |
| CRYL1     | 2,015420912 | 2,57E-11 |
| LINC01004 | 2,014503333 | 0,000216 |
| CSPG5     | 2,011853844 | 6,79E-05 |
| CRB3      | 2,010583588 | 5,73E-05 |
| GSTZ1     | 2,009663218 | 4,87E-13 |
| HDAC10    | 2,008880241 | 1,10E-08 |
| C1QTNF9B  | 2,005372571 | 7,42E-05 |
| ZNF627    | 2,004424658 | 6,30E-15 |
| EMB       | 2,004116539 | 1,14E-13 |
| ZSCAN16   | 2,001681778 | 2,18E-09 |
| HMGB2     | 1,999702614 | 8,38E-09 |
| ZMYM5     | 1,999583969 | 3,65E-08 |
| SLC2A11   | 1,999483096 | 1,33E-06 |
| NUDT3     | 1,997100976 | 1,83E-09 |
| ARF5      | 1,996222545 | 3,33E-29 |
| ELL3      | 1,991516142 | 1,03E-05 |
| EIF4EBP2  | 1,990456016 | 2,56E-11 |
| SLC9A3R1  | 1,989675394 | 2,12E-11 |
| DTNBP1    | 1,984899448 | 9,92E-10 |
| RMND5B    | 1,980678414 | 9,94E-20 |
| HMG20B    | 1,979176686 | 4,43E-25 |
| KALRN     | 1,978022336 | 0,000543 |
| NPDC1     | 1,976175774 | 3,09E-17 |
| ICK       | 1,973683144 | 3,54E-15 |
| DHTKD1    | 1,972929229 | 3,79E-17 |
| ZNF256    | 1,971938439 | 4,82E-05 |
| LOC100125 | 1,969354773 | 2,23E-05 |
| MIR600HG  | 1,968520079 | 9,58E-05 |
| AP1S1     | 1,966155379 | 6,05E-09 |
| KRT8      | 1,965918718 | 3,38E-09 |
| FAM134B   | 1,965605506 | 0,000157 |
| TP53TG1   | 1,96130137  | 7,02E-09 |
| TRIM45    | 1,958884651 | 1,71E-06 |
| NUDT4     | 1,956152564 | 5,55E-13 |
| C21orf33  | 1,955421472 | 1,55E-08 |
| TMEM183E  | 1,953409975 | 2,90E-07 |
| RAB27A    | 1,953301386 | 8,14E-12 |
| TNFRSF19  | 1,953128706 | 8,41E-14 |
| HSD3B7    | 1,952242176 | 6,28E-11 |
| RNF165    | 1,952194857 | 0,000775 |
| FUT8      | 1,951261655 | 4,21E-19 |

|          |             |          |
|----------|-------------|----------|
| GLB1L2   | 1,949216917 | 2,44E-11 |
| ZCWPW1   | 1,948333534 | 8,66E-05 |
| PROSER1  | 1,947822064 | 9,22E-23 |
| ZNF76    | 1,938134154 | 1,89E-10 |
| BRPF3    | 1,936434621 | 3,32E-18 |
| SOX4     | 1,934144927 | 4,79E-18 |
| PLOD3    | 1,930099499 | 6,26E-19 |
| ZNF485   | 1,928448035 | 1,27E-05 |
| RNASET2  | 1,92759738  | 4,50E-09 |
| GRK6     | 1,925486463 | 4,77E-21 |
| VPS9D1   | 1,922325273 | 0,000201 |
| EDC3     | 1,918855488 | 8,55E-14 |
| BCAR1    | 1,91722274  | 5,49E-08 |
| MARC1    | 1,916812634 | 1,61E-09 |
| ZNF3     | 1,913193773 | 1,01E-17 |
| DGKZ     | 1,909376938 | 2,02E-16 |
| PPM1L    | 1,909297441 | 7,63E-05 |
| KDM5B    | 1,908905436 | 9,13E-11 |
| GPSM2    | 1,906482236 | 4,76E-19 |
| SIPA1L1  | 1,903112599 | 4,13E-20 |
| ADRA2C   | 1,903008113 | 9,77E-11 |
| BOLA1    | 1,902512432 | 3,90E-10 |
| ADARB1   | 1,899644082 | 1,69E-07 |
| SERINC5  | 1,89916434  | 4,91E-07 |
| STK19    | 1,896951891 | 1,07E-05 |
| CD82     | 1,892419838 | 0,000127 |
| ONECUT2  | 1,887298321 | 1,52E-08 |
| CORO1B   | 1,887277213 | 3,20E-07 |
| MROH1    | 1,886707833 | 1,53E-10 |
| ALKBH4   | 1,884332022 | 1,44E-11 |
| PLXNA3   | 1,882523709 | 4,24E-10 |
| PCSK6    | 1,881733471 | 4,40E-08 |
| MAPK3    | 1,880373672 | 3,80E-08 |
| ITPR2    | 1,879048752 | 2,24E-07 |
| ASNA1    | 1,878493938 | 4,82E-25 |
| MYL12A   | 1,875922621 | 1,17E-18 |
| HDAC5    | 1,875710719 | 4,11E-06 |
| SORT1    | 1,870722018 | 2,12E-11 |
| KIFC1    | 1,869009839 | 2,30E-12 |
| FGFR3    | 1,864847382 | 9,74E-06 |
| CCNE2    | 1,861929936 | 6,25E-09 |
| SUV420H2 | 1,860903247 | 1,83E-07 |
| MREG     | 1,859043429 | 1,57E-11 |
| SSBP3    | 1,857626133 | 1,97E-11 |
| EFNA4    | 1,857483124 | 1,10E-09 |
| SIRT5    | 1,853484434 | 4,30E-12 |
| DYM      | 1,851863872 | 5,19E-19 |
| GNB2     | 1,851837139 | 8,47E-20 |
| TMEM168  | 1,851817005 | 1,25E-15 |
| GTF3A    | 1,851758718 | 9,06E-24 |

|           |             |          |
|-----------|-------------|----------|
| CENPU     | 1,85150746  | 5,55E-09 |
| ISYNA1    | 1,851484552 | 3,90E-15 |
| ZNF687    | 1,848122997 | 2,42E-19 |
| SPPL2A    | 1,847231008 | 4,12E-17 |
| SEMA4C    | 1,846869219 | 2,34E-11 |
| REEP6     | 1,838361156 | 2,03E-09 |
| ZNF431    | 1,8351493   | 1,24E-08 |
| MARCH9    | 1,8322987   | 7,83E-09 |
| NRARP     | 1,831844088 | 0,000147 |
| MB21D2    | 1,831516304 | 3,57E-07 |
| SP5       | 1,830999802 | 2,95E-09 |
| THNSL1    | 1,830628421 | 6,82E-14 |
| SYDE2     | 1,830100863 | 0,000136 |
| TMEM52    | 1,828826736 | 0,000114 |
| SUMO3     | 1,828246272 | 3,15E-22 |
| GCDH      | 1,819530643 | 1,82E-14 |
| MAST1     | 1,816762973 | 0,000457 |
| C19orf43  | 1,815028407 | 1,21E-22 |
| SLC9A3R2  | 1,814251649 | 1,22E-14 |
| NPIP5     | 1,809802117 | 4,12E-06 |
| DCP2      | 1,809301865 | 5,67E-12 |
| TMEM183   | 1,808905399 | 7,16E-17 |
| ZKSCAN1   | 1,80872353  | 4,06E-17 |
| FAM110A   | 1,8082731   | 4,87E-09 |
| PSMG3-AS1 | 1,808220464 | 1,58E-05 |
| NCOA3     | 1,802915535 | 5,04E-13 |
| ZFYVE21   | 1,801419418 | 3,17E-13 |
| PNPLA8    | 1,801231962 | 5,54E-05 |
| TNPO2     | 1,80069351  | 1,16E-07 |
| CACNB3    | 1,800340768 | 6,82E-12 |
| TEAD2     | 1,799669952 | 1,27E-09 |
| PRSS16    | 1,798172877 | 1,44E-05 |
| ENSA      | 1,797371777 | 7,31E-23 |
| SH3BP1    | 1,796736014 | 2,06E-06 |
| GSE1      | 1,790330202 | 6,08E-21 |
| IQCH-AS1  | 1,78727421  | 1,64E-06 |
| FRS2      | 1,782430862 | 1,28E-08 |
| CBX2      | 1,779989113 | 3,09E-16 |
| TBX2      | 1,779776282 | 6,26E-09 |
| SELENBP1  | 1,779519876 | 1,58E-08 |
| RHBDF1    | 1,779131746 | 1,70E-11 |
| CCDC64    | 1,77904904  | 1,02E-06 |
| MGAT4A    | 1,778006486 | 4,58E-05 |
| GMIP      | 1,777090586 | 3,50E-07 |
| RALGDS    | 1,776349076 | 1,15E-12 |
| PLEKHG5   | 1,772839345 | 0,000543 |
| RNF168    | 1,771670924 | 1,03E-15 |
| WDR53     | 1,771148437 | 3,38E-08 |
| LOC220725 | 1,770089512 | 4,19E-05 |
| A1BG-AS1  | 1,770018839 | 0,000117 |

|          |             |          |
|----------|-------------|----------|
| DGCR6L   | 1,766406253 | 2,17E-15 |
| TMEM134  | 1,763391585 | 3,73E-08 |
| PLEKHN1  | 1,762791527 | 0,000296 |
| SEC22B   | 1,762682296 | 7,59E-12 |
| ZNF232   | 1,758428287 | 6,33E-05 |
| IDNK     | 1,75815492  | 2,43E-05 |
| SETDB1   | 1,75751223  | 1,85E-12 |
| GLCCI1   | 1,753382935 | 7,42E-05 |
| ZNF710   | 1,751546904 | 6,56E-12 |
| ZNF713   | 1,749254334 | 3,01E-05 |
| ZNF304   | 1,748869667 | 2,70E-09 |
| C11orf80 | 1,747285269 | 2,40E-07 |
| MAZ      | 1,746071445 | 1,11E-17 |
| ZNF430   | 1,741171783 | 2,06E-06 |
| TRAPPC2L | 1,741150871 | 1,42E-13 |
| TPD52L1  | 1,740747824 | 6,22E-07 |
| MYO6     | 1,739450458 | 3,06E-19 |
| EMP2     | 1,736198441 | 3,60E-08 |
| MNX1-AS1 | 1,735842426 | 0,000109 |
| ICAM3    | 1,734220139 | 2,97E-05 |
| TRIM39   | 1,731996293 | 2,97E-06 |
| ZNRF1    | 1,730510272 | 1,90E-17 |
| THOC6    | 1,729949554 | 1,32E-06 |
| VPS72    | 1,729803637 | 7,31E-09 |
| CHPF     | 1,729666423 | 1,31E-05 |
| PRADC1   | 1,729535501 | 1,72E-05 |
| ATXN7L3B | 1,728935661 | 1,80E-23 |
| ADAM15   | 1,727495736 | 1,65E-16 |
| PKMYT1   | 1,726812354 | 7,59E-11 |
| TRPM7    | 1,725999479 | 2,07E-20 |
| CIRBP    | 1,725658759 | 5,88E-07 |
| GAS5     | 1,724330068 | 0,000261 |
| ZNF714   | 1,721676024 | 4,13E-08 |
| SMTN     | 1,721576215 | 9,68E-15 |
| EFNA3    | 1,721390601 | 1,07E-07 |
| UBL3     | 1,716095962 | 5,98E-09 |
| FAM53B   | 1,715752579 | 1,15E-17 |
| ZNF821   | 1,71529262  | 1,11E-05 |
| PACSIN3  | 1,715036443 | 2,89E-14 |
| ZNF74    | 1,714599705 | 4,61E-13 |
| RFXAP    | 1,713774602 | 0,000544 |
| RNF115   | 1,712985094 | 4,60E-16 |
| SMARCD2  | 1,712130812 | 2,41E-21 |
| TP53INP2 | 1,709874387 | 0,001011 |
| GTF2IRD1 | 1,707533752 | 7,54E-13 |
| TNRC6C   | 1,7031664   | 6,58E-13 |
| ISOC2    | 1,701603929 | 6,50E-19 |
| CPT1A    | 1,69533654  | 4,53E-17 |
| DUS4L    | 1,693716874 | 6,88E-09 |
| MEST     | 1,693193648 | 2,00E-20 |



|           |             |          |
|-----------|-------------|----------|
| ISOC1     | 1,69019797  | 6,33E-16 |
| RAB11FIP4 | 1,689064617 | 1,69E-12 |
| LPIN3     | 1,688756864 | 6,47E-08 |
| PRUNE     | 1,688418196 | 4,88E-14 |
| NELFCD    | 1,687419097 | 1,90E-14 |
| MPND      | 1,68740221  | 1,34E-08 |
| FBXO31    | 1,686775283 | 5,49E-15 |
| TRIM62    | 1,6834757   | 1,61E-05 |
| ZNF136    | 1,67548157  | 0,000607 |
| BRCA2     | 1,674501036 | 1,80E-05 |
| TCF19     | 1,674418639 | 1,74E-10 |
| CUL7      | 1,673827848 | 8,16E-07 |
| C1orf21   | 1,673703474 | 2,23E-05 |
| DECR1     | 1,672889689 | 2,02E-13 |
| USP20     | 1,6724634   | 1,07E-08 |
| EPHB4     | 1,670927283 | 2,86E-17 |
| SLC35B2   | 1,667550501 | 1,66E-09 |
| POGZ      | 1,667143024 | 8,23E-09 |
| FAM193B   | 1,66193578  | 1,20E-06 |
| ZNF688    | 1,657502548 | 1,16E-05 |
| PLA2G12A  | 1,657377491 | 4,71E-09 |
| SLC24A1   | 1,656971304 | 1,18E-06 |
| ZNF721    | 1,656293968 | 6,74E-12 |
| KRBA1     | 1,656165537 | 7,04E-07 |
| METTL4    | 1,653433247 | 5,36E-06 |
| PFKL      | 1,651012236 | 3,76E-12 |
| COBLL1    | 1,650509119 | 5,62E-07 |
| PIAS2     | 1,649998602 | 1,20E-12 |
| MED28     | 1,649138509 | 1,61E-10 |
| CGREF1    | 1,648034211 | 5,56E-09 |
| CD276     | 1,647255556 | 4,89E-09 |
| GNAS      | 1,645752681 | 1,76E-20 |
| NHP2      | 1,645181046 | 2,00E-19 |
| MTL5      | 1,643349457 | 4,40E-05 |
| FAM63A    | 1,642896889 | 0,000792 |
| CASP6     | 1,642609486 | 2,72E-09 |
| CCDC122   | 1,642002479 | 9,56E-06 |
| RMDN1     | 1,640394445 | 2,57E-09 |
| NFIX      | 1,639712691 | 1,56E-05 |
| PPCDC     | 1,639383335 | 2,14E-06 |
| ASNS      | 1,637675376 | 0,00089  |
| POLR2J    | 1,637573017 | 9,36E-11 |
| LLGL2     | 1,636721055 | 6,58E-13 |
| HMG2      | 1,635539635 | 3,89E-14 |
| PI4K2B    | 1,63521932  | 6,97E-09 |
| RBM8A     | 1,630721809 | 1,06E-17 |
| EHMT2     | 1,629017055 | 6,08E-20 |
| MXD3      | 1,626871587 | 5,05E-07 |
| KCTD20    | 1,625766572 | 3,40E-17 |
| SAYS1     | 1,621477404 | 7,04E-11 |

|          |             |          |
|----------|-------------|----------|
| LRIG1    | 1,619917165 | 4,12E-05 |
| MRPL41   | 1,619589904 | 9,64E-12 |
| SRD5A3   | 1,61927828  | 8,46E-09 |
| ZSCAN21  | 1,613437443 | 7,64E-09 |
| C7orf43  | 1,611506378 | 4,38E-07 |
| ATP5D    | 1,610116583 | 1,64E-14 |
| POLR3C   | 1,609579302 | 1,90E-05 |
| ZNF778   | 1,606522712 | 1,01E-07 |
| AP4M1    | 1,602051849 | 5,04E-09 |
| C6orf47  | 1,601562584 | 5,61E-13 |
| CABLES2  | 1,600706449 | 1,21E-08 |
| ZNF316   | 1,599875337 | 7,46E-15 |
| FAM50B   | 1,599422671 | 3,79E-07 |
| CTNNBIP1 | 1,595070626 | 2,34E-06 |
| PCDHB2   | 1,593719349 | 6,81E-07 |
| GABBR1   | 1,591649593 | 0,000382 |
| XXYLT1   | 1,591324993 | 1,01E-11 |
| FGD4     | 1,589279306 | 3,04E-05 |
| ZCCHC14  | 1,588959908 | 3,91E-13 |
| PPP1R13L | 1,587287603 | 2,12E-06 |
| CDC42SE1 | 1,58709755  | 4,51E-12 |
| XPOT     | 1,584767911 | 8,39E-08 |
| ZFP69B   | 1,584624755 | 0,000848 |
| CACFD1   | 1,584485323 | 2,87E-07 |
| ARHGEF37 | 1,582564958 | 0,000759 |
| ABHD16A  | 1,581651027 | 8,44E-12 |
| PEX26    | 1,581114877 | 6,02E-13 |
| DHCR7    | 1,58064779  | 3,88E-08 |
| SLC37A4  | 1,580571867 | 1,24E-14 |
| OARD1    | 1,578698518 | 4,51E-11 |
| MEX3B    | 1,577584145 | 2,20E-10 |
| LONRF1   | 1,577455651 | 0,000394 |
| ANO8     | 1,576294846 | 7,11E-06 |
| RMND5A   | 1,576177853 | 1,42E-11 |
| DNAJC19  | 1,574044238 | 2,17E-07 |
| DVL3     | 1,571408025 | 7,63E-17 |
| ZNF273   | 1,570043918 | 2,17E-05 |
| TRAPPC6A | 1,568873042 | 1,34E-08 |
| CDH24    | 1,564792197 | 2,18E-07 |
| MOSPD3   | 1,56440619  | 3,67E-05 |
| PXDN     | 1,563229916 | 9,97E-08 |
| S100A13  | 1,559916047 | 1,03E-08 |
| SLC25A39 | 1,557167681 | 2,20E-19 |
| PPP2R3A  | 1,554300839 | 8,71E-06 |
| CPSF4    | 1,554093231 | 8,07E-06 |
| SEZ6L2   | 1,553268233 | 1,71E-06 |
| ZNF680   | 1,552328991 | 6,45E-07 |
| GLUD2    | 1,551671778 | 0,000186 |
| ZNF14    | 1,550634924 | 0,000345 |
| PHGDH    | 1,550268574 | 0,000607 |

|           |             |          |
|-----------|-------------|----------|
| APH1A     | 1,547307133 | 3,14E-14 |
| LSS       | 1,545651124 | 4,45E-08 |
| SLC25A1   | 1,542634464 | 1,84E-08 |
| RAC3      | 1,542564919 | 6,82E-07 |
| MEAF6     | 1,541441781 | 1,20E-06 |
| CHD6      | 1,541406534 | 3,79E-16 |
| RTKN2     | 1,540114043 | 6,18E-06 |
| GADD45GII | 1,538266018 | 4,00E-07 |
| ILVBL     | 1,53813994  | 6,52E-12 |
| DLD       | 1,536857008 | 7,15E-08 |
| PNRC2     | 1,535884218 | 1,37E-07 |
| FAM83H    | 1,534689606 | 9,40E-12 |
| NEURL1B   | 1,533865705 | 9,58E-05 |
| SUV420H1  | 1,529798533 | 7,62E-13 |
| RALBP1    | 1,529448835 | 2,38E-09 |
| VDR       | 1,524831516 | 0,000178 |
| CC2D1A    | 1,523506488 | 2,18E-08 |
| ZNF564    | 1,522852677 | 0,000317 |
| FAM222A   | 1,519139863 | 7,44E-06 |
| LMNB1     | 1,516926873 | 6,22E-12 |
| SNRPE     | 1,51689948  | 6,00E-17 |
| ITFG2     | 1,515330574 | 0,000303 |
| MAN2B1    | 1,511690888 | 2,13E-09 |
| GPRIN1    | 1,510967694 | 1,06E-10 |
| AMDHD2    | 1,509398514 | 1,76E-07 |
| KRT18     | 1,509038413 | 8,26E-05 |
| SOX2      | 1,507993645 | 1,59E-05 |
| ARMC10    | 1,50790238  | 1,19E-11 |
| ATP5A1    | 1,506823099 | 1,93E-15 |
| RPS18     | 1,506378397 | 1,82E-06 |
| DHPS      | 1,505480155 | 2,80E-11 |
| MEX3D     | 1,5002235   | 0,000138 |
| EXO5      | 1,499307872 | 0,000375 |
| TRIM24    | 1,499100123 | 3,81E-12 |
| MYBL2     | 1,498712347 | 5,50E-17 |
| TDG       | 1,498397888 | 3,31E-15 |
| SCARB2    | 1,496975206 | 5,04E-10 |
| VPS4B     | 1,495382286 | 1,07E-11 |
| MDM4      | 1,494401962 | 4,22E-05 |
| VTI1B     | 1,493281435 | 2,38E-08 |
| RBM4      | 1,492151044 | 2,54E-11 |
| ZMYM2     | 1,49159086  | 9,38E-13 |
| AHR       | 1,491255485 | 3,38E-13 |
| STUB1     | 1,490973096 | 4,25E-13 |
| DDX49     | 1,489828277 | 4,73E-12 |
| ZNF394    | 1,487037546 | 0,000118 |
| ELOVL7    | 1,486604736 | 1,04E-07 |
| PSMC2     | 1,485823376 | 8,39E-14 |
| SRPK2     | 1,483649405 | 1,28E-13 |
| ANXA6     | 1,48289837  | 0,000114 |

|           |             |          |
|-----------|-------------|----------|
| RAD23A    | 1,482881705 | 3,69E-13 |
| SPATA2L   | 1,482599495 | 1,10E-07 |
| MIF-AS1   | 1,477220568 | 3,49E-06 |
| KIF20A    | 1,472185844 | 1,91E-08 |
| ERMARD    | 1,472082843 | 0,000102 |
| MAPK6     | 1,466932113 | 4,87E-15 |
| ZFP1      | 1,466657922 | 1,69E-08 |
| PATZ1     | 1,46415175  | 1,14E-06 |
| GAS6      | 1,459227592 | 0,001008 |
| TSC22D4   | 1,458642921 | 1,60E-05 |
| ZNF212    | 1,458172363 | 3,17E-07 |
| MVK       | 1,457409856 | 1,91E-05 |
| APRT      | 1,457304254 | 4,04E-14 |
| SLC9A2    | 1,456927794 | 1,33E-05 |
| GTF2IP1   | 1,456906336 | 0,000191 |
| NOP14-AS1 | 1,455006923 | 2,05E-05 |
| TRIM26    | 1,454952296 | 3,92E-11 |
| TMEM254   | 1,454756822 | 2,18E-07 |
| KRIT1     | 1,454470565 | 7,86E-10 |
| TSEN15    | 1,453535836 | 0,000169 |
| AP4B1     | 1,451843142 | 1,78E-09 |
| ARPC1A    | 1,451794612 | 1,42E-09 |
| H2AFX     | 1,449411638 | 6,32E-15 |
| SLC43A2   | 1,449370142 | 1,19E-05 |
| PLEKHA7   | 1,448836189 | 2,71E-07 |
| LRCH4     | 1,448584586 | 2,40E-10 |
| ARHGAP19  | 1,448361522 | 7,38E-05 |
| NDUFA13   | 1,447389317 | 5,31E-12 |
| SSH3      | 1,44619659  | 7,84E-07 |
| ZNF252P   | 1,44527264  | 7,14E-11 |
| SLC12A9   | 1,443157099 | 0,000204 |
| RGS14     | 1,442860957 | 0,000559 |
| PLCG1     | 1,440821108 | 9,24E-12 |
| PPP1R35   | 1,438258078 | 1,40E-06 |
| FYTTD1    | 1,437557965 | 1,25E-07 |
| PODXL2    | 1,436994812 | 1,35E-10 |
| CHST15    | 1,436165079 | 2,53E-07 |
| GPR89A    | 1,436070006 | 0,000108 |
| PAK2      | 1,436007189 | 8,95E-13 |
| DNLZ      | 1,434470285 | 7,24E-09 |
| MMACHC    | 1,434191555 | 2,69E-05 |
| PKP3      | 1,433945312 | 7,23E-07 |
| PRICKLE2  | 1,433268687 | 0,000727 |
| MSL2      | 1,432543345 | 0,000166 |
| PCYOX1L   | 1,432092381 | 0,000106 |
| CLOCK     | 1,43146896  | 6,21E-09 |
| ZNF548    | 1,431333466 | 0,000315 |
| DYNLL2    | 1,42727625  | 5,81E-11 |
| CBLB      | 1,427018723 | 1,09E-07 |
| TMEM63A   | 1,425624463 | 0,000422 |

|           |             |          |
|-----------|-------------|----------|
| ZNF544    | 1,424181033 | 2,63E-10 |
| RPL35A    | 1,423720833 | 2,64E-08 |
| SRF       | 1,421477963 | 5,82E-12 |
| ARHGAP10  | 1,421385365 | 1,52E-07 |
| ZNF791    | 1,421141182 | 1,19E-05 |
| RPL17     | 1,419810186 | 9,06E-07 |
| C22orf29  | 1,419550421 | 1,03E-06 |
| ZNF197    | 1,419416889 | 6,84E-06 |
| NADK2     | 1,417219056 | 1,84E-08 |
| HDHD2     | 1,415168955 | 1,30E-05 |
| BRWD1     | 1,415081233 | 1,16E-10 |
| HAX1      | 1,414691744 | 8,97E-13 |
| NCBP2     | 1,413793384 | 5,00E-15 |
| CCDC88C   | 1,409609994 | 5,88E-05 |
| LINC00998 | 1,409542146 | 0,000689 |
| COPE      | 1,407072954 | 2,00E-12 |
| PDRG1     | 1,406536095 | 0,000539 |
| GALNT12   | 1,405813148 | 2,84E-06 |
| RUSC1     | 1,40554405  | 9,23E-09 |
| SH2B2     | 1,403857823 | 0,000191 |
| HADH      | 1,402063527 | 1,47E-05 |
| CLTB      | 1,399562372 | 4,52E-05 |
| PEX1      | 1,397550073 | 1,09E-07 |
| SETMAR    | 1,396776716 | 1,29E-07 |
| MPV17L2   | 1,395449421 | 1,82E-08 |
| ARRDC1    | 1,395104613 | 6,64E-09 |
| TUFT1     | 1,393840115 | 0,000175 |
| PCYT2     | 1,393564957 | 3,88E-06 |
| HYOU1     | 1,392996346 | 1,76E-09 |
| ATPAF1    | 1,392037207 | 8,50E-08 |
| CCDC167   | 1,391283073 | 0,000522 |
| ABCC5     | 1,391079386 | 6,25E-05 |
| FAM21A    | 1,390501111 | 1,23E-10 |
| CHTF18    | 1,390425183 | 5,69E-06 |
| LSM4      | 1,389251548 | 3,86E-13 |
| MRPL11    | 1,388854221 | 1,39E-11 |
| PDCD10    | 1,387338292 | 1,51E-08 |
| PACS2     | 1,386889225 | 8,21E-11 |
| WWP1      | 1,386546961 | 0,00024  |
| SLC2A4RG  | 1,385540877 | 4,12E-10 |
| ZNF839    | 1,385339533 | 0,000233 |
| TSPYL5    | 1,382372011 | 2,53E-13 |
| MEA1      | 1,38069121  | 1,14E-12 |
| GOLPH3L   | 1,380535644 | 0,000132 |
| LHX4      | 1,380186587 | 2,36E-07 |
| RNF44     | 1,378800519 | 3,40E-09 |
| LYSMD2    | 1,378045555 | 1,26E-05 |
| FBXW4     | 1,375797471 | 2,33E-07 |
| SLC39A6   | 1,375544961 | 3,38E-06 |
| ZNF675    | 1,375481501 | 7,18E-06 |

|          |             |          |
|----------|-------------|----------|
| FKBPL    | 1,375433708 | 1,06E-05 |
| CSK      | 1,372413992 | 7,28E-06 |
| ARPC1B   | 1,372243989 | 1,27E-06 |
| KCTD13   | 1,37204319  | 1,73E-06 |
| ZNHIT1   | 1,370236208 | 0,000193 |
| RING1    | 1,368451018 | 3,71E-09 |
| MRPS18A  | 1,368089062 | 1,59E-09 |
| RAB1B    | 1,367120495 | 4,42E-05 |
| STK40    | 1,3668479   | 4,16E-05 |
| BCL7C    | 1,365945725 | 1,09E-09 |
| TET3     | 1,365793199 | 7,74E-12 |
| VAV3     | 1,364991059 | 0,000167 |
| PTPMT1   | 1,363474949 | 1,05E-11 |
| MOAP1    | 1,362424717 | 5,42E-06 |
| RNASEH2C | 1,362312482 | 3,42E-05 |
| TTC39C   | 1,362215911 | 8,71E-06 |
| GCA      | 1,361513938 | 0,000219 |
| NFKBIL1  | 1,361499892 | 5,69E-07 |
| TET2     | 1,359102426 | 1,22E-08 |
| NELFE    | 1,357306661 | 4,59E-13 |
| FOXN3    | 1,35632151  | 0,00041  |
| FDX1L    | 1,356061556 | 9,76E-07 |
| RFWD2    | 1,35559882  | 5,37E-10 |
| ATF6B    | 1,350480103 | 1,71E-08 |
| TATDN1   | 1,347320716 | 3,92E-10 |
| TMEM161/ | 1,344960811 | 1,70E-05 |
| NSD1     | 1,344868831 | 1,20E-14 |
| KRCC1    | 1,344624201 | 0,000128 |
| GAB1     | 1,344521682 | 0,000237 |
| ESD      | 1,343958655 | 2,53E-10 |
| PPP1R3D  | 1,342998295 | 8,46E-05 |
| FAM195A  | 1,342289513 | 8,64E-09 |
| CELSR2   | 1,341404506 | 9,20E-09 |
| MUT      | 1,340460901 | 3,27E-06 |
| MTSS1L   | 1,33814895  | 7,92E-07 |
| HSBP1L1  | 1,336514033 | 0,000169 |
| ZNF276   | 1,33568763  | 1,12E-06 |
| UCP2     | 1,33450853  | 9,13E-09 |
| ARMCX6   | 1,333370127 | 9,15E-07 |
| MTERF1   | 1,332538452 | 0,000162 |
| RAB6A    | 1,330554047 | 7,41E-07 |
| PTTG1IP  | 1,329608188 | 4,10E-13 |
| PPP1R14B | 1,32942841  | 9,91E-12 |
| LTBP1    | 1,329241941 | 3,58E-08 |
| TMEM265  | 1,328414736 | 7,71E-05 |
| PIEZO1   | 1,326433502 | 6,49E-11 |
| RHPN1    | 1,324128957 | 0,000374 |
| SNX27    | 1,323184452 | 6,40E-10 |
| TELO2    | 1,322931094 | 4,88E-10 |
| NDRG2    | 1,322796653 | 0,000689 |

|          |             |          |
|----------|-------------|----------|
| ZBTB10   | 1,322785426 | 2,08E-06 |
| DBF4     | 1,322597314 | 3,87E-08 |
| KIAA0226 | 1,320860061 | 3,34E-08 |
| DHRS7B   | 1,320464047 | 2,89E-06 |
| PIK3R2   | 1,319730103 | 2,44E-05 |
| ARFGAP2  | 1,317534633 | 4,27E-10 |
| DNPH1    | 1,31716321  | 1,17E-07 |
| OBSL1    | 1,317048888 | 0,000107 |
| ZNF607   | 1,316895139 | 4,77E-05 |
| LRRC1    | 1,315523996 | 2,09E-06 |
| TBCC     | 1,315232881 | 7,51E-06 |
| TMC6     | 1,311848402 | 2,50E-05 |
| LIMK2    | 1,309772778 | 0,000301 |
| PREX1    | 1,309672775 | 3,06E-08 |
| DCXR     | 1,30913244  | 1,44E-08 |
| FBXO45   | 1,308930932 | 9,95E-07 |
| ZNF398   | 1,308928075 | 3,39E-10 |
| NFYA     | 1,307919507 | 1,18E-06 |
| KARS     | 1,307147078 | 5,05E-11 |
| CYBA     | 1,306881999 | 1,03E-07 |
| RPRD2    | 1,305857044 | 4,82E-11 |
| CBLL1    | 1,302740794 | 4,13E-09 |
| AK4      | 1,301754914 | 1,09E-07 |
| PBX2     | 1,300986672 | 2,22E-11 |
| ADCK2    | 1,300044247 | 6,75E-06 |
| IVD      | 1,297263479 | 4,24E-07 |
| SEPT3    | 1,297102241 | 0,000522 |
| NECAB3   | 1,296773849 | 9,20E-05 |
| CSNK2B   | 1,296703391 | 6,03E-11 |
| PRR14    | 1,296508692 | 6,53E-09 |
| DXO      | 1,295497275 | 3,02E-05 |
| HMGB3    | 1,295131999 | 2,93E-12 |
| PYCARD   | 1,29427364  | 0,000972 |
| INPPL1   | 1,291453401 | 6,34E-11 |
| SF3B4    | 1,291175975 | 9,49E-14 |
| RHOBTB3  | 1,291132315 | 4,64E-09 |
| ATP6V0E2 | 1,290606575 | 0,000168 |
| CYB5R1   | 1,290377781 | 0,000193 |
| AFG3L2   | 1,290139581 | 9,69E-12 |
| PSMD4    | 1,289669582 | 5,50E-14 |
| OLFM2    | 1,289137464 | 8,38E-05 |
| GRINA    | 1,28841561  | 0,000317 |
| METRNL   | 1,288320245 | 3,31E-07 |
| DDX41    | 1,283601505 | 2,31E-10 |
| SMMDT1   | 1,282439894 | 0,000303 |
| UBN2     | 1,282207352 | 2,81E-06 |
| MSX2     | 1,281847223 | 0,000153 |
| MFSD2A   | 1,280759781 | 0,000247 |
| HSDL1    | 1,279222957 | 1,15E-05 |
| C14orf80 | 1,279028678 | 2,98E-07 |

|         |             |          |
|---------|-------------|----------|
| ZMIZ1   | 1,275762399 | 2,34E-06 |
| AKT1    | 1,275356506 | 1,59E-06 |
| RINT1   | 1,275128087 | 2,39E-05 |
| PCCB    | 1,27473925  | 1,20E-08 |
| NDUFB9  | 1,274300654 | 7,18E-07 |
| CNPY4   | 1,273330797 | 0,000231 |
| AARS2   | 1,270795924 | 3,13E-08 |
| SPATA17 | 1,269527649 | 0,00015  |
| DOCK6   | 1,267897957 | 1,45E-07 |
| ZNF33B  | 1,267029159 | 0,000831 |
| DDX20   | 1,266341751 | 1,24E-07 |
| C7orf50 | 1,266179458 | 4,56E-08 |
| SFI1    | 1,26334502  | 9,82E-05 |
| PVRL1   | 1,262030075 | 0,000734 |
| PGM2L1  | 1,259425001 | 2,38E-05 |
| MMP17   | 1,258468103 | 0,000894 |
| SATB2   | 1,257772583 | 0,000235 |
| PUSL1   | 1,257383848 | 5,59E-05 |
| GAMT    | 1,256803019 | 5,25E-05 |
| IDI1    | 1,256089258 | 5,28E-05 |
| ATP5L   | 1,255441832 | 1,43E-09 |
| HSPB1   | 1,252741647 | 1,31E-06 |
| MCCC1   | 1,251119072 | 0,000126 |
| TCF25   | 1,250994998 | 3,60E-07 |
| NUCKS1  | 1,249609097 | 4,23E-11 |
| ZFH3    | 1,24894895  | 6,34E-07 |
| RPS25   | 1,248534913 | 1,98E-07 |
| RFXANK  | 1,248043127 | 3,36E-05 |
| PRKCZ   | 1,247876093 | 0,00011  |
| CTIF    | 1,247813235 | 1,53E-05 |
| TDP1    | 1,246565773 | 2,41E-08 |
| TIGD6   | 1,244659418 | 0,000566 |
| SPATA33 | 1,243879076 | 4,13E-06 |
| WRB     | 1,243689064 | 1,64E-05 |
| PSMB4   | 1,241995836 | 2,60E-08 |
| AFG3L1P | 1,240959384 | 2,72E-05 |
| PRRC2A  | 1,239416696 | 2,77E-11 |
| KBTBD7  | 1,238547041 | 0,000117 |
| CNOT2   | 1,238211474 | 7,55E-11 |
| CSRNP2  | 1,23696558  | 5,07E-07 |
| RBM38   | 1,235210816 | 1,17E-08 |
| TFAP2A  | 1,235103509 | 1,30E-11 |
| JTB     | 1,234002921 | 1,92E-09 |
| NES     | 1,233927999 | 0,000775 |
| CMC2    | 1,23113776  | 1,59E-06 |
| SARS    | 1,230144167 | 3,96E-05 |
| PPP4C   | 1,228004257 | 3,46E-11 |
| DNAL4   | 1,227678033 | 0,000392 |
| BUD31   | 1,227111292 | 3,50E-11 |
| CACNA1H | 1,226862743 | 8,63E-07 |



|          |             |          |
|----------|-------------|----------|
| GLTSCR1L | 1,226236485 | 4,18E-06 |
| COMTD1   | 1,224925185 | 1,29E-06 |
| FNBP1    | 1,223741509 | 3,03E-08 |
| UQCR10   | 1,222902625 | 1,39E-06 |
| IFT46    | 1,222680215 | 1,25E-07 |
| ZNF205   | 1,220845204 | 3,36E-05 |
| TMBIM4   | 1,220298928 | 9,24E-06 |
| CD47     | 1,219669471 | 8,42E-08 |
| GGCT     | 1,218863864 | 6,32E-10 |
| ZNF397   | 1,218799223 | 8,15E-05 |
| ATXN7L1  | 1,21557037  | 9,12E-05 |
| PRMT2    | 1,215329665 | 7,42E-05 |
| NDST1    | 1,214180957 | 9,09E-07 |
| ATMIN    | 1,213160866 | 5,57E-10 |
| MDC1     | 1,213136372 | 1,34E-06 |
| TROAP    | 1,213098126 | 0,000695 |
| TMEM128  | 1,211810981 | 0,000951 |
| MAPKAPK2 | 1,210288689 | 2,52E-10 |
| BCL9     | 1,209110899 | 2,41E-06 |
| TERF2IP  | 1,207556118 | 1,47E-07 |
| MCUR1    | 1,207132891 | 2,28E-05 |
| ZNF764   | 1,206348785 | 4,37E-05 |
| FAM185A  | 1,206296536 | 0,000491 |
| MTMR4    | 1,205934839 | 5,23E-09 |
| ATP5F1   | 1,20547367  | 2,82E-08 |
| CUX1     | 1,204324394 | 1,35E-08 |
| PI4KB    | 1,20428892  | 6,76E-08 |
| PEX10    | 1,203678774 | 3,44E-07 |
| CUL9     | 1,202329053 | 8,33E-06 |
| TCF3     | 1,201443832 | 1,43E-09 |
| MAD2L1BP | 1,201337244 | 3,96E-05 |
| POLR3GL  | 1,20118375  | 0,000187 |
| ANKS1A   | 1,199773705 | 7,49E-08 |
| MARCKSL1 | 1,199185196 | 6,90E-12 |
| PIAS3    | 1,198686118 | 4,83E-09 |
| SMAGP    | 1,198683445 | 0,000198 |
| RPL26L1  | 1,197919145 | 4,17E-06 |
| MCM7     | 1,195742337 | 4,49E-08 |
| STMN1    | 1,19571987  | 0,00042  |
| NDUFB5   | 1,192804921 | 6,35E-05 |
| SUPT20H  | 1,19218194  | 0,000816 |
| SMG7     | 1,190925769 | 1,27E-11 |
| SLC35B3  | 1,18879956  | 8,26E-05 |
| SGPL1    | 1,188470235 | 1,30E-07 |
| EFCAB11  | 1,18680129  | 0,000375 |
| NUDT16L1 | 1,18649597  | 6,17E-06 |
| HNRNPAB  | 1,185127431 | 8,30E-11 |
| GPANK1   | 1,184877933 | 7,68E-05 |
| SSR2     | 1,184003481 | 7,78E-06 |
| TAMM41   | 1,183335761 | 0,00016  |

|          |             |          |
|----------|-------------|----------|
| NACC1    | 1,181560852 | 9,51E-09 |
| USP8     | 1,180279507 | 3,13E-10 |
| RRP1     | 1,17758296  | 1,98E-05 |
| PPP1R2   | 1,177566679 | 1,21E-06 |
| MLYCD    | 1,175151717 | 0,000263 |
| NR2F2    | 1,175032872 | 1,81E-06 |
| PTGFRN   | 1,174139567 | 2,90E-08 |
| C7orf73  | 1,173467606 | 1,34E-08 |
| NDUFB7   | 1,172841436 | 5,40E-09 |
| ROGDI    | 1,172838245 | 2,16E-05 |
| POLR3B   | 1,170495679 | 6,42E-06 |
| MED20    | 1,169858032 | 0,000715 |
| ZBTB9    | 1,169541662 | 5,29E-06 |
| RBPJ     | 1,16913058  | 4,94E-07 |
| OTUD7B   | 1,169035602 | 1,06E-08 |
| RP9      | 1,166816769 | 0,000411 |
| PKNOX1   | 1,166542322 | 0,000151 |
| GATAD1   | 1,166455083 | 0,000189 |
| ZNF322   | 1,166401928 | 0,000321 |
| RPS3     | 1,164176433 | 4,36E-06 |
| DUS1L    | 1,16403822  | 3,59E-06 |
| PAN3     | 1,16393559  | 0,000333 |
| DNPEP    | 1,163917049 | 4,54E-09 |
| TBC1D9B  | 1,162645182 | 1,76E-09 |
| TMEM141  | 1,161899849 | 6,47E-07 |
| LYSMD1   | 1,160564141 | 0,000171 |
| AGAP3    | 1,15980204  | 1,31E-06 |
| SLC25A10 | 1,159241746 | 6,09E-05 |
| IMPACT   | 1,158336906 | 5,37E-06 |
| C19orf52 | 1,158330637 | 0,000151 |
| PPP6R2   | 1,157266332 | 0,000113 |
| PDE7A    | 1,156816276 | 0,000335 |
| PCGF3    | 1,153862926 | 2,69E-08 |
| KMT2C    | 1,15331557  | 1,31E-06 |
| ZNF23    | 1,153146829 | 0,000133 |
| FGFR1OP  | 1,153122153 | 0,000343 |
| PKN1     | 1,152140538 | 4,34E-08 |
| BCYRN1   | 1,151441208 | 0,000565 |
| MAML1    | 1,150689475 | 8,76E-06 |
| COPG2    | 1,15061265  | 1,49E-05 |
| RNF43    | 1,150290858 | 1,74E-06 |
| ZNF786   | 1,148144434 | 1,45E-06 |
| NBN      | 1,146904071 | 3,46E-09 |
| TARS2    | 1,145255124 | 1,32E-05 |
| AP5Z1    | 1,14399897  | 2,44E-05 |
| ATP5I    | 1,143875958 | 4,25E-08 |
| GIN52    | 1,143682143 | 5,09E-06 |
| NT5DC2   | 1,142676274 | 1,06E-08 |
| RPP40    | 1,142443441 | 4,16E-05 |
| SLC25A13 | 1,140638757 | 1,23E-05 |

|          |             |          |
|----------|-------------|----------|
| MRPS25   | 1,140115636 | 1,07E-07 |
| NMRAL1   | 1,13927116  | 4,36E-06 |
| STK38    | 1,13853745  | 1,63E-07 |
| TOP1     | 1,138346762 | 2,42E-10 |
| TMEM64   | 1,136272217 | 1,12E-08 |
| SQLE     | 1,136054023 | 7,00E-07 |
| ATP8B1   | 1,134950651 | 1,17E-05 |
| UGCG     | 1,134413584 | 5,76E-05 |
| SECISBP2 | 1,133166361 | 7,59E-07 |
| ZNF652   | 1,133054565 | 9,82E-07 |
| SEC11C   | 1,132357994 | 0,000483 |
| RANBP9   | 1,13142984  | 9,08E-07 |
| ACSF3    | 1,131053822 | 1,48E-05 |
| MRPL9    | 1,129467536 | 1,57E-05 |
| OSBPL10  | 1,12844989  | 4,74E-06 |
| RPL18A   | 1,128253885 | 1,02E-06 |
| ACTR6    | 1,128060701 | 1,33E-05 |
| PTPN2    | 1,127065019 | 3,13E-07 |
| LDOC1    | 1,12694928  | 0,000146 |
| ATP1A1   | 1,126409818 | 8,89E-08 |
| ZMYND8   | 1,124504321 | 4,25E-08 |
| RHEB     | 1,124392373 | 3,92E-06 |
| PSPC1    | 1,122984126 | 9,25E-06 |
| EXD2     | 1,122651226 | 1,64E-07 |
| SKP2     | 1,121591103 | 5,25E-07 |
| ATP2C1   | 1,120950909 | 1,07E-07 |
| CCDC112  | 1,120119649 | 0,00063  |
| DNAJC2   | 1,119407708 | 4,10E-08 |
| AP4E1    | 1,11821056  | 3,75E-05 |
| CDC45    | 1,117538297 | 0,000189 |
| ZNF480   | 1,115547498 | 9,21E-05 |
| SHFM1    | 1,115160626 | 4,71E-09 |
| BRD2     | 1,115046611 | 5,87E-05 |
| PEX11B   | 1,114990132 | 0,000112 |
| FARSA    | 1,114747629 | 1,30E-05 |
| PELI3    | 1,114491441 | 0,00016  |
| FLRT3    | 1,113144905 | 2,90E-06 |
| HMGB1    | 1,112331665 | 6,19E-11 |
| THAP5    | 1,111553799 | 2,04E-07 |
| KLHDC2   | 1,108978553 | 0,000572 |
| DNAAF3   | 1,108915707 | 0,000172 |
| DBP      | 1,108336321 | 0,000559 |
| USP38    | 1,108051613 | 0,000163 |
| COX5B    | 1,105973344 | 6,87E-08 |
| IMPDH1   | 1,10555886  | 1,39E-06 |
| MIS18A   | 1,10480064  | 0,000252 |
| ATXN7    | 1,103820807 | 4,52E-05 |
| MRPL4    | 1,103819815 | 2,14E-08 |
| WIBG     | 1,103432307 | 6,82E-05 |
| SMARCB1  | 1,101651743 | 1,34E-06 |

|           |             |          |
|-----------|-------------|----------|
| WIZ       | 1,101206975 | 5,18E-09 |
| SYNE2     | 1,101070863 | 0,000178 |
| SLC39A7   | 1,100630461 | 4,90E-06 |
| ZNF33A    | 1,100415014 | 1,77E-05 |
| PRKAB2    | 1,09968928  | 0,000238 |
| TMEM167F  | 1,098749485 | 0,000339 |
| VGLL4     | 1,09833812  | 5,69E-06 |
| RPL13     | 1,097489402 | 7,60E-06 |
| SMAD1     | 1,097434095 | 4,62E-06 |
| NCK2      | 1,09677507  | 6,18E-08 |
| ADD3      | 1,096596529 | 1,03E-05 |
| AKAP9     | 1,095950691 | 7,72E-06 |
| B4GALT7   | 1,09532618  | 3,37E-05 |
| NDUFC1    | 1,094850393 | 1,71E-05 |
| BCR       | 1,094645054 | 0,000921 |
| CTNNA1    | 1,094268657 | 1,04E-09 |
| CRTC1     | 1,093656024 | 7,90E-05 |
| RPL14     | 1,093646861 | 1,03E-07 |
| ZNF32     | 1,092020292 | 8,02E-05 |
| RPSAP58   | 1,091768226 | 1,94E-07 |
| ALDH5A1   | 1,090738811 | 1,58E-05 |
| IFT22     | 1,089917339 | 5,91E-07 |
| PPP1R11   | 1,088822354 | 5,03E-06 |
| TUG1      | 1,087498126 | 3,37E-08 |
| CDYL      | 1,086534483 | 1,18E-06 |
| SRGAP2    | 1,086077707 | 3,73E-08 |
| PRELID1   | 1,084775886 | 4,13E-08 |
| VPS9D1-AS | 1,083308534 | 3,19E-05 |
| CFDP1     | 1,082189954 | 7,01E-07 |
| ANKRD50   | 1,080938807 | 9,67E-08 |
| OSTC      | 1,079246391 | 2,47E-05 |
| HCG18     | 1,078853097 | 5,68E-06 |
| SERPINH1  | 1,077830955 | 8,31E-07 |
| TRAPPC6B  | 1,077587503 | 2,38E-05 |
| RPL21     | 1,076503034 | 4,49E-06 |
| COX4I1    | 1,075809014 | 1,95E-07 |
| FAM89B    | 1,074605238 | 2,17E-06 |
| SURF1     | 1,074600897 | 0,000773 |
| NCAPG2    | 1,073765915 | 9,24E-06 |
| EBAG9     | 1,07349799  | 0,000216 |
| CLIC1     | 1,072743497 | 1,27E-05 |
| TOR3A     | 1,070720526 | 1,06E-07 |
| ITFG3     | 1,070518678 | 0,000234 |
| DBNDD1    | 1,070147442 | 1,72E-05 |
| ZBTB1     | 1,069901216 | 2,38E-06 |
| TPT1      | 1,06923943  | 4,82E-05 |
| C6orf106  | 1,068864163 | 0,000391 |
| MRPS18C   | 1,065812279 | 5,53E-05 |
| MCL1      | 1,06310542  | 5,07E-09 |
| RPL30     | 1,062982447 | 0,000305 |

|          |             |          |
|----------|-------------|----------|
| POMP     | 1,062005961 | 0,000567 |
| CNOT6    | 1,061430238 | 4,02E-06 |
| COG6     | 1,060197208 | 0,00078  |
| YIPF3    | 1,059718674 | 7,10E-06 |
| SUMF1    | 1,057669319 | 0,000532 |
| TMEM251  | 1,057234922 | 3,04E-05 |
| TOMM6    | 1,054867143 | 1,31E-08 |
| UBAC1    | 1,054522378 | 1,40E-06 |
| VANGL1   | 1,053711803 | 5,96E-05 |
| NUSAP1   | 1,051935535 | 0,000344 |
| RAB24    | 1,051547917 | 0,000645 |
| TRAK2    | 1,051343028 | 3,57E-06 |
| HAUS1    | 1,050730581 | 0,00042  |
| AIMP2    | 1,049948232 | 2,64E-07 |
| ECSIT    | 1,048523649 | 7,35E-05 |
| LAMTOR4  | 1,048409805 | 3,96E-06 |
| CMTR1    | 1,043870241 | 7,13E-06 |
| PNMA1    | 1,042964573 | 3,39E-05 |
| NSMCE2   | 1,042626926 | 7,33E-05 |
| NFE2L3   | 1,04259968  | 8,80E-05 |
| STYXL1   | 1,042319998 | 0,000614 |
| ECHS1    | 1,04133194  | 1,14E-06 |
| STX16    | 1,040018376 | 0,001015 |
| ZNF254   | 1,038999865 | 0,000192 |
| SIVA1    | 1,038757111 | 5,15E-05 |
| NR1D2    | 1,038616261 | 2,39E-05 |
| PIAS4    | 1,037229354 | 0,000234 |
| BAG6     | 1,036551579 | 4,19E-06 |
| MRPL14   | 1,03619389  | 1,51E-06 |
| SNRPC    | 1,033856456 | 1,34E-08 |
| RMND1    | 1,032597687 | 4,04E-06 |
| DDX6     | 1,030804467 | 8,00E-08 |
| RPL21P28 | 1,03006454  | 0,000888 |
| CCDC124  | 1,029242853 | 1,06E-05 |
| GUK1     | 1,029166223 | 0,000566 |
| ADAT1    | 1,028847673 | 6,47E-06 |
| HIGD2A   | 1,026245761 | 4,05E-05 |
| VPS45    | 1,025259961 | 1,17E-05 |
| ZKSCAN5  | 1,023181628 | 4,05E-05 |
| MAP1LC3B | 1,023110535 | 0,000981 |
| MARK3    | 1,023025165 | 0,000107 |
| TRPM4    | 1,022282082 | 6,05E-05 |
| FZD6     | 1,021761606 | 0,0002   |
| ZNF282   | 1,020437996 | 2,92E-05 |
| BSDC1    | 1,020300878 | 0,000295 |
| SENP5    | 1,020232608 | 3,97E-06 |
| SERP1    | 1,019574059 | 4,25E-08 |
| UQCC2    | 1,019251745 | 0,000639 |
| SAP130   | 1,018427699 | 4,27E-08 |
| KLHDC4   | 1,018222055 | 2,09E-05 |

|          |             |          |
|----------|-------------|----------|
| PPFIA3   | 1,018011416 | 1,16E-05 |
| MBD1     | 1,016868111 | 1,24E-06 |
| MICU2    | 1,016801537 | 1,35E-05 |
| PDAP1    | 1,014627663 | 5,18E-07 |
| ZC3H13   | 1,013481658 | 1,74E-05 |
| TMEM241  | 1,012058014 | 0,000177 |
| ZNRF3    | 1,010408598 | 1,29E-06 |
| EPB41L4B | 1,010117961 | 0,000268 |
| POLR1D   | 1,009853906 | 5,60E-05 |
| DAXX     | 1,009543472 | 2,31E-06 |
| ATP13A1  | 1,007839709 | 1,58E-06 |
| TMED10   | 1,007728796 | 6,44E-06 |
| NUFIP1   | 1,007363168 | 3,69E-05 |
| YWHAZ    | 1,005575909 | 2,38E-05 |
| WBP4     | 1,005469051 | 0,000533 |
| UPF1     | 1,004727353 | 3,52E-07 |
| ARMT1    | 1,003823671 | 5,96E-06 |
| CEP170B  | 1,002539932 | 5,71E-07 |
| MRPS18B  | 0,998502838 | 7,59E-06 |
| RAB13    | 0,997181138 | 0,000465 |
| RAD21    | 0,996575065 | 2,60E-08 |
| TMEM205  | 0,995701873 | 0,000454 |
| NDUFAF6  | 0,995037298 | 0,000139 |
| ZBTB41   | 0,994215905 | 5,92E-05 |
| C7orf26  | 0,993938643 | 4,84E-06 |
| SOS2     | 0,99307999  | 0,000195 |
| ABT1     | 0,991735458 | 9,69E-05 |
| NDUFAB1  | 0,990495297 | 0,000726 |
| ERI2     | 0,989914346 | 0,000651 |
| SDAD1    | 0,989518362 | 0,000189 |
| RFC2     | 0,988676324 | 2,77E-07 |
| TYRO3    | 0,988667055 | 0,000139 |
| HARS2    | 0,988645261 | 8,78E-06 |
| MKS1     | 0,988283957 | 0,000556 |
| CSTB     | 0,987176659 | 1,57E-05 |
| ZFAND2B  | 0,986947882 | 0,00031  |
| KDM6B    | 0,985996517 | 0,00064  |
| UBL7     | 0,983391584 | 5,01E-05 |
| COPS6    | 0,982016107 | 4,41E-07 |
| LSG1     | 0,9817954   | 1,12E-05 |
| RAB22A   | 0,981517884 | 1,24E-06 |
| ESYT2    | 0,980955806 | 1,80E-07 |
| N4BP2L2  | 0,980477976 | 7,74E-05 |
| PSMB1    | 0,980464144 | 1,28E-05 |
| TUBA1A   | 0,978906213 | 7,71E-06 |
| UBAP2L   | 0,97840977  | 0,000675 |
| BAK1     | 0,977880797 | 1,32E-05 |
| STX6     | 0,976915247 | 3,59E-06 |
| CDK8     | 0,976584028 | 2,41E-05 |
| TPX2     | 0,975682159 | 1,40E-06 |

|           |             |          |
|-----------|-------------|----------|
| SEH1L     | 0,975556971 | 7,60E-07 |
| GATAD2A   | 0,975302694 | 1,39E-06 |
| PUS7      | 0,974020476 | 0,000341 |
| CBR4      | 0,971804775 | 0,000395 |
| MIDN      | 0,971552548 | 2,11E-05 |
| ANGEL1    | 0,970636458 | 1,90E-05 |
| DCTN4     | 0,969057749 | 9,29E-06 |
| SEPHS1    | 0,968560196 | 0,000189 |
| ABCA2     | 0,968234681 | 0,000987 |
| PSMC3     | 0,964506259 | 4,69E-08 |
| PYCR1     | 0,964019677 | 0,000289 |
| KAT5      | 0,962879713 | 8,47E-05 |
| AP2M1     | 0,961901549 | 0,000239 |
| ZFP90     | 0,961463646 | 2,37E-05 |
| DIAPH1    | 0,960457504 | 0,000114 |
| BTBD6     | 0,957401226 | 6,59E-05 |
| C9orf114  | 0,95690856  | 0,000251 |
| MRFAP1    | 0,956786866 | 1,63E-06 |
| VPS11     | 0,953744955 | 0,000623 |
| CARM1     | 0,951769374 | 3,08E-06 |
| TRAPPC10  | 0,949928981 | 2,29E-05 |
| VAPB      | 0,949717811 | 0,000106 |
| ZNF768    | 0,949683058 | 3,21E-05 |
| MTMR3     | 0,949611898 | 1,18E-05 |
| GID8      | 0,948695055 | 5,55E-07 |
| COX6A1    | 0,948684642 | 2,07E-06 |
| RIPK1     | 0,948560697 | 0,000218 |
| BLVRA     | 0,94795564  | 0,000669 |
| RIOK3     | 0,947100471 | 0,00099  |
| LEO1      | 0,946231    | 2,06E-06 |
| LINC00674 | 0,945440408 | 0,000537 |
| KMT2E     | 0,944547486 | 6,91E-05 |
| GLRX5     | 0,944264267 | 9,98E-05 |
| SLC7A2    | 0,943462408 | 0,000433 |
| UBR2      | 0,941525047 | 4,69E-05 |
| CHMP1A    | 0,940216151 | 0,00035  |
| BCAP29    | 0,939196198 | 0,000137 |
| SPIRE1    | 0,939101531 | 4,53E-05 |
| WRNIP1    | 0,938826416 | 0,000292 |
| ADRBK1    | 0,938738592 | 0,000115 |
| SMG5      | 0,935979302 | 6,53E-06 |
| SLC19A1   | 0,935053861 | 4,05E-05 |
| SNX18     | 0,934819487 | 0,000713 |
| LMAN2     | 0,934679054 | 2,75E-05 |
| CARKD     | 0,933446013 | 0,000422 |
| ZNF84     | 0,930932678 | 0,000263 |
| CNOT4     | 0,930447279 | 0,000319 |
| TACC3     | 0,929263403 | 0,000864 |
| TRIM41    | 0,925449765 | 1,87E-05 |
| SEPT8     | 0,924522623 | 0,000133 |

|           |             |          |
|-----------|-------------|----------|
| LARS      | 0,924081418 | 4,10E-05 |
| PMPCB     | 0,924081011 | 2,75E-05 |
| TAF1C     | 0,924030338 | 0,000183 |
| DERL1     | 0,922536294 | 0,000433 |
| PDCL3     | 0,920992217 | 0,000482 |
| TIMM44    | 0,920599251 | 7,86E-05 |
| DCAF16    | 0,919577484 | 0,000968 |
| SHROOM3   | 0,914982732 | 0,000455 |
| ACTR10    | 0,913115358 | 0,000204 |
| C19orf60  | 0,912861641 | 0,000458 |
| DOPEY2    | 0,908157338 | 0,000122 |
| CYTH2     | 0,907903126 | 0,000458 |
| SRSF9     | 0,907895927 | 7,52E-06 |
| MRPL57    | 0,906299411 | 1,01E-05 |
| PPP2R5E   | 0,905080083 | 3,66E-05 |
| EVL       | 0,904220444 | 0,000296 |
| NBPF15    | 0,904086233 | 0,000298 |
| ALG5      | 0,902550088 | 0,000206 |
| RBM17     | 0,90203211  | 0,000133 |
| AGPAT3    | 0,901754575 | 0,000255 |
| KDM2A     | 0,901386044 | 2,27E-05 |
| PHKG2     | 0,900355471 | 0,000111 |
| INTS3     | 0,897487682 | 2,91E-06 |
| RNF130    | 0,897109471 | 0,000459 |
| SMURF1    | 0,896457809 | 3,82E-05 |
| HYAL2     | 0,896176614 | 0,00012  |
| ACTR3B    | 0,895900379 | 0,000739 |
| MDH2      | 0,894292754 | 6,22E-05 |
| FKBP8     | 0,893353707 | 0,000956 |
| CPNE3     | 0,893300452 | 2,60E-05 |
| GPATCH2   | 0,892538454 | 0,000229 |
| KIAA1522  | 0,892469878 | 1,10E-05 |
| KLHL36    | 0,890167609 | 0,000314 |
| NCBP2-AS2 | 0,884802337 | 0,000941 |
| UFD1L     | 0,883794021 | 1,73E-05 |
| WHSC1     | 0,882445505 | 8,54E-05 |
| NDUFV3    | 0,882287438 | 1,72E-05 |
| RABIF     | 0,879910787 | 0,000449 |
| MTCH1     | 0,879749315 | 0,000146 |
| STK11     | 0,877935311 | 4,15E-05 |
| RTKN      | 0,877880573 | 0,000665 |
| PYGO2     | 0,877648332 | 6,93E-05 |
| SCFD1     | 0,87744508  | 5,22E-05 |
| GCC1      | 0,876052046 | 0,000394 |
| CDK2AP2   | 0,876012988 | 0,000136 |
| ARF3      | 0,876003351 | 0,000102 |
| STAG1     | 0,875327396 | 2,17E-05 |
| SAMD1     | 0,875100121 | 0,00065  |
| ACAT2     | 0,875020044 | 0,000129 |
| OAZ1      | 0,873421511 | 2,80E-05 |



|          |             |          |
|----------|-------------|----------|
| RPS2     | 0,87174412  | 9,28E-06 |
| PPP4R3A  | 0,871680946 | 2,08E-05 |
| MRPS10   | 0,870427129 | 5,19E-05 |
| ASCC2    | 0,865116781 | 0,000214 |
| FBXL19   | 0,864445223 | 0,000158 |
| FOXP4    | 0,863297608 | 0,000668 |
| RNF40    | 0,861531502 | 0,000129 |
| ZKSCAN8  | 0,861027266 | 0,000403 |
| SLC52A2  | 0,86017945  | 0,000125 |
| PPIL1    | 0,85950481  | 6,37E-05 |
| TRIM27   | 0,855866726 | 0,000756 |
| BCKDK    | 0,855574476 | 0,000148 |
| CEP63    | 0,855040343 | 0,000987 |
| SLC3A2   | 0,854563366 | 1,30E-05 |
| NUMA1    | 0,854166767 | 4,04E-05 |
| LEMD2    | 0,853318497 | 5,59E-05 |
| GAK      | 0,85285052  | 1,69E-05 |
| CYP51A1  | 0,852361194 | 3,67E-05 |
| CCNF     | 0,850995041 | 2,21E-05 |
| LCMT1    | 0,85057831  | 0,000415 |
| TMEM9    | 0,849765761 | 6,05E-05 |
| ENOPH1   | 0,848839504 | 7,98E-05 |
| C6orf89  | 0,847850643 | 0,000102 |
| SURF2    | 0,847242629 | 0,000463 |
| CHMP4B   | 0,847014018 | 5,26E-06 |
| ZDHHC4   | 0,846156025 | 0,000226 |
| FAM207A  | 0,844579125 | 0,000485 |
| SNRPD3   | 0,844533583 | 7,09E-05 |
| CDCA3    | 0,844360299 | 0,000344 |
| GCSH     | 0,842373766 | 0,000502 |
| GLCE     | 0,842067007 | 5,60E-05 |
| BCL7A    | 0,841876264 | 0,000618 |
| HDAC3    | 0,840965622 | 0,000198 |
| STX7     | 0,840781998 | 0,000727 |
| PPP1CA   | 0,840373003 | 2,91E-06 |
| FBR3     | 0,838416744 | 5,18E-06 |
| SEPHS2   | 0,836377555 | 9,14E-06 |
| SS18     | 0,835434365 | 0,000143 |
| STAG2    | 0,834391525 | 7,52E-06 |
| TRIP11   | 0,833243118 | 0,000417 |
| ACAA2    | 0,832668075 | 6,52E-05 |
| LEMD3    | 0,831878167 | 0,00034  |
| FAM120AC | 0,831126757 | 0,000387 |
| RPUSD1   | 0,82945637  | 0,00055  |
| TBC1D10B | 0,82939139  | 4,18E-05 |
| ZMIZ2    | 0,827488368 | 1,21E-05 |
| TSEN54   | 0,826103152 | 0,000904 |
| FZR1     | 0,824762639 | 0,00042  |
| GNAI3    | 0,82473303  | 0,000107 |
| GNB2L1   | 0,822468617 | 6,09E-05 |

|          |             |          |
|----------|-------------|----------|
| PSMD7    | 0,821862284 | 7,56E-06 |
| CTBP1    | 0,82183206  | 9,16E-05 |
| PRR7     | 0,819515917 | 0,000516 |
| ARNT     | 0,819088037 | 7,25E-05 |
| CDC5L    | 0,818474906 | 7,03E-05 |
| PPT1     | 0,818150791 | 0,000958 |
| RNF114   | 0,816576677 | 0,000128 |
| ACTL6A   | 0,81613134  | 0,000143 |
| MCM2     | 0,816011261 | 1,27E-05 |
| EARS2    | 0,815443161 | 0,000433 |
| FAHD1    | 0,812392831 | 0,000118 |
| C16orf13 | 0,810848802 | 0,00011  |
| TRAF4    | 0,810819216 | 1,72E-05 |
| SPINT2   | 0,810289462 | 3,48E-05 |
| TNIP2    | 0,808861043 | 0,000165 |
| TRRAP    | 0,800889462 | 5,50E-05 |
| H2AFZ    | 0,798790784 | 0,000379 |
| NFRKB    | 0,798618621 | 0,00042  |
| CAND1    | 0,798249984 | 0,000126 |
| CANX     | 0,797503341 | 7,26E-05 |
| DCAF15   | 0,795701557 | 0,00087  |
| YIF1A    | 0,794204919 | 7,60E-05 |
| MRPS21   | 0,792776662 | 8,26E-05 |
| GNL1     | 0,791318506 | 0,000291 |
| SREBF2   | 0,786336993 | 0,000988 |
| COX7C    | 0,785818964 | 6,00E-05 |
| ARMC6    | 0,784712772 | 0,000499 |
| TAF6     | 0,784405578 | 0,000255 |
| SAP18    | 0,780984561 | 0,00011  |
| RAF1     | 0,778632373 | 0,00016  |
| MAP2K2   | 0,777634661 | 0,000635 |
| TMEM106C | 0,776570553 | 0,000158 |
| WDR73    | 0,775659744 | 0,000412 |
| PABPC1   | 0,774858761 | 1,26E-05 |
| PPIL2    | 0,773907784 | 0,000326 |
| MRPL2    | 0,771813728 | 0,000259 |
| CXXC1    | 0,771734521 | 0,000996 |
| EPB41L5  | 0,771506803 | 0,000569 |
| PANK3    | 0,771425473 | 0,000285 |
| NOL7     | 0,768343986 | 0,000433 |
| TEX2     | 0,766932347 | 0,000268 |
| PPP2R5C  | 0,766648179 | 0,000313 |
| TACO1    | 0,766160368 | 0,000108 |
| DHX38    | 0,766155384 | 0,000289 |
| NELFA    | 0,765467201 | 0,000672 |
| TLCD1    | 0,765332077 | 0,00078  |
| MORC2    | 0,764741168 | 6,53E-05 |
| SLC25A24 | 0,764665629 | 0,000239 |
| SMIM7    | 0,764186021 | 0,000576 |
| KNOP1    | 0,763157198 | 0,00018  |

|          |              |          |
|----------|--------------|----------|
| RAE1     | 0,760172001  | 0,000965 |
| H3F3B    | 0,759582159  | 2,17E-05 |
| RNF139   | 0,759162242  | 0,000285 |
| SYPL1    | 0,75624972   | 0,001015 |
| FDPS     | 0,755231544  | 5,08E-05 |
| MRFAP1L1 | 0,755071296  | 0,000292 |
| IMP4     | 0,75255653   | 6,38E-05 |
| SNRPA1   | 0,751902976  | 0,000423 |
| C14orf2  | 0,751875384  | 0,000775 |
| PPIF     | 0,748698523  | 6,84E-05 |
| SMCHD1   | 0,746357012  | 0,000658 |
| RRP36    | 0,742786237  | 0,000167 |
| CTBP2    | 0,740221571  | 0,000818 |
| ZMYND11  | 0,738642855  | 0,000595 |
| MTA2     | 0,73445575   | 5,80E-05 |
| PTPN18   | 0,725963545  | 0,000943 |
| CASP2    | 0,72439561   | 0,00035  |
| RPL8     | 0,723706563  | 0,000122 |
| CCNI     | 0,720473533  | 7,85E-05 |
| LAPTM4B  | 0,718332101  | 0,000137 |
| SMPD4    | 0,717232212  | 0,000153 |
| CCNA2    | 0,714324714  | 0,000285 |
| VAR5     | 0,712443421  | 5,33E-05 |
| YWHAH    | 0,709524699  | 0,000206 |
| ANKIB1   | 0,709430201  | 0,000367 |
| KMT2D    | 0,700916676  | 0,000674 |
| AVL9     | 0,700433425  | 0,00031  |
| ITPK1    | 0,697197182  | 0,000182 |
| ADK      | 0,687662251  | 0,000786 |
| YY1      | 0,687228966  | 0,000967 |
| FBRSL1   | 0,685227611  | 0,000328 |
| XPO5     | 0,681644693  | 0,000264 |
| TADA3    | 0,679901     | 0,000916 |
| PRCC     | 0,679370156  | 0,000437 |
| GUCD1    | 0,677448256  | 0,000871 |
| SLC44A1  | 0,674520283  | 0,000566 |
| DLGAP5   | 0,671140577  | 0,000866 |
| CENPN    | 0,670769492  | 0,00087  |
| RBM15B   | 0,647169217  | 0,000486 |
| BPTF     | 0,621311867  | 0,000864 |
| ILF2     | 0,614464184  | 0,00073  |
| YWHAQ    | -0,615805196 | 0,00102  |
| PSMD8    | -0,618283043 | 0,000635 |
| NAP1L4   | -0,634832197 | 0,000885 |
| AEN      | -0,634931801 | 0,000861 |
| RPL23    | -0,638373365 | 0,000747 |
| DNM1L    | -0,63945966  | 0,000895 |
| EBNA1BP2 | -0,660055921 | 0,000735 |
| NME4     | -0,663290458 | 0,000321 |
| WNK1     | -0,664126607 | 0,000416 |

|          |              |          |
|----------|--------------|----------|
| TMX2     | -0,665984556 | 0,000751 |
| DSG2     | -0,66772735  | 0,000822 |
| RBCK1    | -0,672340416 | 0,000617 |
| DCTN1    | -0,676725379 | 0,000759 |
| COPZ1    | -0,679547019 | 0,000385 |
| CHMP2B   | -0,682598648 | 0,000859 |
| PITPNA   | -0,684886017 | 0,000965 |
| UBQLN1   | -0,689331975 | 0,000457 |
| SRP68    | -0,701757293 | 0,000284 |
| NASP     | -0,704239511 | 0,000172 |
| TFAM     | -0,707300232 | 0,000404 |
| SLC31A1  | -0,710547164 | 0,00035  |
| COX7B    | -0,7142806   | 0,000714 |
| KIF4A    | -0,714860174 | 0,000714 |
| C11orf58 | -0,725512534 | 9,72E-05 |
| NCL      | -0,726901273 | 2,48E-05 |
| STK25    | -0,729866019 | 0,000392 |
| PPP1CB   | -0,733117821 | 0,000693 |
| FAM199X  | -0,733450403 | 0,000353 |
| DDX47    | -0,733525111 | 0,000471 |
| IPO5     | -0,733705228 | 0,000221 |
| PAFAH1B2 | -0,734793018 | 0,000248 |
| ESF1     | -0,736833143 | 0,000369 |
| POLRMT   | -0,737051572 | 0,000459 |
| MDN1     | -0,738538154 | 0,000268 |
| PFN2     | -0,740538061 | 0,000105 |
| PRPF8    | -0,741955326 | 0,000509 |
| ZFP91    | -0,742185365 | 0,000536 |
| BROX     | -0,744335137 | 0,000791 |
| RCN1     | -0,748346929 | 0,000129 |
| PUM2     | -0,751028285 | 7,98E-05 |
| GALNT1   | -0,751453662 | 0,000101 |
| XRN2     | -0,753269517 | 0,000164 |
| KPNA6    | -0,755062063 | 0,000414 |
| NSFL1C   | -0,755244245 | 0,000472 |
| PAFAH1B1 | -0,757831769 | 6,03E-05 |
| IKBKAP   | -0,75890065  | 0,00036  |
| SEPT7    | -0,760150858 | 0,000237 |
| NPTN     | -0,763144396 | 0,000116 |
| KIAA0232 | -0,764107972 | 0,000582 |
| CCT4     | -0,764323019 | 1,05E-05 |
| VEZF1    | -0,764800912 | 0,000443 |
| EXOSC2   | -0,766717224 | 0,000291 |
| DHX40    | -0,76706401  | 8,06E-05 |
| PHRF1    | -0,767949693 | 5,33E-05 |
| CCT6A    | -0,770515707 | 2,84E-05 |
| ICMT     | -0,772835514 | 3,95E-05 |
| RBM42    | -0,773761013 | 0,00025  |
| PHACTR4  | -0,774559856 | 0,000132 |
| LANCL1   | -0,774951898 | 0,000355 |

|          |              |          |
|----------|--------------|----------|
| ATXN2    | -0,775669381 | 0,000618 |
| PCGF5    | -0,777940188 | 0,000402 |
| DDHD2    | -0,777982578 | 0,00089  |
| DDX3X    | -0,778193048 | 2,37E-05 |
| ACBD3    | -0,779070322 | 0,000266 |
| SMAD2    | -0,781112084 | 5,38E-05 |
| CSNK2A2  | -0,784748071 | 0,000361 |
| VMA21    | -0,784847754 | 0,000678 |
| KIF3B    | -0,785876021 | 0,001011 |
| POLR2C   | -0,785990469 | 7,34E-05 |
| GRIPAP1  | -0,786086481 | 0,000264 |
| OGFOD1   | -0,7861782   | 0,000218 |
| TTC17    | -0,786894397 | 0,000938 |
| SHMT1    | -0,788817501 | 0,000417 |
| SUPT5H   | -0,791259896 | 0,000454 |
| CNOT1    | -0,792881385 | 4,47E-05 |
| KAT6A    | -0,793473522 | 0,000243 |
| CASC3    | -0,794781895 | 0,000164 |
| FAM83G   | -0,795532151 | 0,000543 |
| BAZ2A    | -0,796483285 | 7,03E-05 |
| EML1     | -0,796561098 | 0,000491 |
| IDH3A    | -0,797048711 | 2,80E-05 |
| AUP1     | -0,797085886 | 6,93E-05 |
| NUP98    | -0,797223833 | 1,15E-05 |
| ZZEF1    | -0,798535317 | 0,000149 |
| COPB1    | -0,79903482  | 4,33E-05 |
| ENTPD6   | -0,799108593 | 6,35E-05 |
| DDX55    | -0,801208104 | 0,00036  |
| SNHG16   | -0,80128069  | 0,000238 |
| POLD1    | -0,801354623 | 0,000399 |
| TRAF3IP1 | -0,801777985 | 0,000631 |
| CDK16    | -0,802781964 | 1,49E-05 |
| WBP11    | -0,80310758  | 2,46E-05 |
| CFLAR    | -0,805557754 | 0,0002   |
| TSR1     | -0,805831967 | 6,11E-06 |
| PFN1     | -0,806419879 | 2,15E-06 |
| ICE1     | -0,810174627 | 0,000163 |
| PTP4A2   | -0,812685959 | 9,54E-05 |
| PRPF4    | -0,813589413 | 5,82E-05 |
| IMPAD1   | -0,814040967 | 3,67E-05 |
| UBA1     | -0,814148794 | 0,000502 |
| CALM2    | -0,815265537 | 7,27E-06 |
| AKAP13   | -0,816733811 | 3,52E-05 |
| UQCRFS1  | -0,817069918 | 1,11E-05 |
| RSPRY1   | -0,817760497 | 0,00032  |
| NT5C3B   | -0,820435218 | 8,17E-05 |
| SMC5     | -0,82110688  | 0,000696 |
| PDCD5    | -0,821293847 | 3,83E-05 |
| MELK     | -0,822071739 | 5,69E-05 |
| SUPT6H   | -0,822343879 | 0,000457 |

|           |              |          |
|-----------|--------------|----------|
| GLUD1     | -0,8246912   | 1,16E-05 |
| NAA35     | -0,827230346 | 0,000333 |
| SLC27A2   | -0,828729111 | 0,000317 |
| ECT2      | -0,829093725 | 1,23E-05 |
| NDEL1     | -0,829384886 | 0,000474 |
| ZYG11B    | -0,82939773  | 0,00065  |
| SLC25A22  | -0,8298654   | 0,000642 |
| FAM49B    | -0,83029425  | 3,07E-05 |
| PACSIN2   | -0,831199145 | 0,000953 |
| TMEM248   | -0,831311231 | 0,000151 |
| UBAC2     | -0,833493191 | 0,000789 |
| STRN      | -0,833666351 | 7,98E-05 |
| AATF      | -0,833792543 | 5,66E-06 |
| PROSER3   | -0,83421459  | 0,000906 |
| MRPS12    | -0,835318672 | 0,00042  |
| ERCC6L2   | -0,835847658 | 0,000601 |
| VPS37A    | -0,836191151 | 0,000305 |
| ANKS6     | -0,836200772 | 0,000259 |
| FOCAD     | -0,838518424 | 0,000415 |
| COA6      | -0,838691128 | 0,000987 |
| SMU1      | -0,843020382 | 2,13E-05 |
| TTC7A     | -0,843199424 | 0,000609 |
| NPLOC4    | -0,843876538 | 6,44E-06 |
| ALDH3A2   | -0,844429871 | 7,43E-06 |
| RHOF      | -0,844964371 | 0,000135 |
| NLGN2     | -0,847520671 | 0,000776 |
| CD151     | -0,847943843 | 1,14E-05 |
| ALS2      | -0,84912157  | 0,000462 |
| ARHGAP11  | -0,852228568 | 0,000168 |
| INTS7     | -0,852580033 | 0,000133 |
| RAPGEF6   | -0,853446898 | 0,000412 |
| FAM129B   | -0,854375967 | 0,000112 |
| WDR12     | -0,85513409  | 2,70E-05 |
| RNGTT     | -0,855255788 | 0,000395 |
| IER3      | -0,855519298 | 0,000438 |
| MIA3      | -0,856712653 | 8,60E-05 |
| C14orf119 | -0,858468091 | 0,000835 |
| NDUFA10   | -0,858644395 | 4,68E-05 |
| PSENEN    | -0,859837187 | 0,00012  |
| TBCA      | -0,860963787 | 0,000241 |
| RNASEH1   | -0,861454912 | 7,13E-05 |
| GCC2      | -0,862195747 | 0,000968 |
| BFAR      | -0,864211793 | 2,93E-05 |
| CTDNEP1   | -0,865125621 | 5,08E-05 |
| ATL2      | -0,868738908 | 2,73E-05 |
| NMT1      | -0,869751094 | 1,58E-05 |
| GIGYF2    | -0,869972168 | 1,03E-05 |
| STAT5B    | -0,870507917 | 7,78E-05 |
| HUWE1     | -0,870826121 | 9,10E-07 |
| TVP23B    | -0,870974903 | 0,000369 |

|           |              |          |
|-----------|--------------|----------|
| HIAT1     | -0,871258207 | 0,000178 |
| PTP4A1    | -0,872040859 | 1,00E-05 |
| HMG20A    | -0,872083756 | 0,000285 |
| NCKAP1    | -0,872768051 | 3,47E-05 |
| TMED7     | -0,873084074 | 6,52E-05 |
| EFTUD2    | -0,874155921 | 8,40E-05 |
| FNDC3A    | -0,874309281 | 0,000113 |
| KIAA1551  | -0,875052173 | 0,000545 |
| PRKDC     | -0,876494398 | 0,000193 |
| GGH       | -0,87693641  | 0,000931 |
| SBNO1     | -0,877148381 | 4,72E-05 |
| IPO9      | -0,878269061 | 0,000243 |
| KMT2B     | -0,878777647 | 1,97E-05 |
| SNX9      | -0,879130218 | 0,000392 |
| TMEM181   | -0,880549019 | 0,000582 |
| EDEM2     | -0,883189518 | 0,000383 |
| PARD3     | -0,883794256 | 7,35E-05 |
| XPC       | -0,884124908 | 7,42E-05 |
| ZFAND6    | -0,884296038 | 0,000138 |
| EXTL3     | -0,885060717 | 9,06E-05 |
| RFC5      | -0,885342173 | 0,00054  |
| SLC35A2   | -0,886260578 | 0,000411 |
| POLR1E    | -0,888268795 | 0,000226 |
| STRAP     | -0,888295394 | 7,88E-05 |
| LINC01420 | -0,888457904 | 0,000384 |
| CD24      | -0,888490001 | 0,000486 |
| HEBP1     | -0,888989377 | 0,000864 |
| GOPC      | -0,893928509 | 8,34E-05 |
| ATP6V1B2  | -0,89559927  | 1,89E-05 |
| MTFMT     | -0,895620119 | 0,000533 |
| RECQL     | -0,896619604 | 9,64E-05 |
| SMCR8     | -0,89776349  | 1,00E-05 |
| COX15     | -0,898197295 | 8,28E-06 |
| MRPL44    | -0,898493991 | 9,20E-05 |
| CHUK      | -0,901446522 | 0,000316 |
| PSMA1     | -0,902104356 | 6,46E-06 |
| ZDHC5     | -0,902161803 | 1,38E-06 |
| MRPS26    | -0,902456259 | 0,000127 |
| GEMIN7    | -0,903976778 | 0,000955 |
| PSMC4     | -0,907342319 | 3,11E-07 |
| SAAL1     | -0,909573833 | 5,35E-05 |
| FASTKD5   | -0,910324897 | 0,000304 |
| BECN1     | -0,911934458 | 1,92E-05 |
| SHB       | -0,91215614  | 1,24E-05 |
| PSMB3     | -0,914548599 | 1,90E-06 |
| GIT1      | -0,920866187 | 1,34E-06 |
| UBE2R2    | -0,920976739 | 9,07E-06 |
| MYCBP2    | -0,921060609 | 0,000196 |
| GNB5      | -0,922431762 | 0,000195 |
| PSEN2     | -0,922725266 | 0,00056  |

|           |              |          |
|-----------|--------------|----------|
| OSBP      | -0,92378496  | 2,93E-05 |
| HMGA1     | -0,927376175 | 2,59E-05 |
| ARFGEF1   | -0,933677864 | 6,68E-05 |
| LYPLA1    | -0,934288139 | 3,05E-05 |
| MEN1      | -0,935267564 | 3,20E-06 |
| ARL14EP   | -0,936651086 | 0,000321 |
| DHX33     | -0,938294384 | 2,07E-05 |
| NPTXR     | -0,938839121 | 0,000725 |
| NUP85     | -0,940974666 | 0,000448 |
| USP24     | -0,941037152 | 9,09E-05 |
| PPP3CA    | -0,945433384 | 7,59E-05 |
| HIP1      | -0,945714245 | 4,89E-06 |
| CAD       | -0,94665571  | 7,05E-05 |
| GPATCH1   | -0,946690618 | 0,000143 |
| DDX21     | -0,947908187 | 0,000116 |
| CD81      | -0,948330828 | 2,19E-07 |
| TRIM44    | -0,949707115 | 2,81E-07 |
| RAB11FIP2 | -0,949828484 | 0,000749 |
| RAPGEF1   | -0,950615564 | 0,00014  |
| VSIG10    | -0,9516154   | 0,000132 |
| AGPAT5    | -0,951918518 | 4,70E-05 |
| DDX51     | -0,95271156  | 1,51E-05 |
| DNAJC16   | -0,953266068 | 0,00098  |
| TSG101    | -0,953845862 | 0,000133 |
| NCOR1     | -0,954431054 | 2,36E-07 |
| SOAT1     | -0,956204876 | 0,000483 |
| ARIH2     | -0,957541547 | 6,15E-06 |
| TTL       | -0,959640381 | 5,69E-05 |
| TRAM2     | -0,959880085 | 2,96E-06 |
| NAT14     | -0,961968843 | 0,00099  |
| NSMAF     | -0,962437367 | 1,63E-05 |
| ARID1B    | -0,962600144 | 4,58E-05 |
| MYH10     | -0,963437287 | 1,60E-06 |
| TMCC1     | -0,963454774 | 4,58E-05 |
| NOC4L     | -0,965301199 | 1,07E-05 |
| KIAA1143  | -0,967617616 | 0,000794 |
| CTNS      | -0,96792933  | 0,000473 |
| TIMM50    | -0,968765763 | 1,34E-07 |
| ATM       | -0,969248206 | 0,00023  |
| DDX17     | -0,969300907 | 3,35E-06 |
| CYP20A1   | -0,970921043 | 8,50E-05 |
| CRLS1     | -0,971055194 | 5,70E-05 |
| MAGT1     | -0,971448421 | 1,31E-06 |
| RPS16     | -0,971968571 | 0,000323 |
| SUZ12     | -0,972038494 | 5,25E-06 |
| URB2      | -0,972289412 | 3,12E-05 |
| TRIM32    | -0,972941801 | 6,75E-05 |
| SLC16A1   | -0,974071835 | 1,08E-05 |
| API5      | -0,974100191 | 4,82E-06 |
| SNTB2     | -0,975221555 | 0,000264 |



|           |              |          |
|-----------|--------------|----------|
| AMD1      | -0,975439816 | 0,000103 |
| LAPTM4A   | -0,975639745 | 4,41E-07 |
| PHF8      | -0,975756268 | 0,000133 |
| LEPROT    | -0,975805316 | 0,000142 |
| FN3KRP    | -0,977579542 | 1,85E-05 |
| CARS2     | -0,978518928 | 7,37E-05 |
| TRAF3     | -0,980217977 | 1,64E-05 |
| TOMM20    | -0,980380532 | 1,14E-05 |
| PIN4      | -0,981487059 | 0,000168 |
| AMOTL1    | -0,981493835 | 3,41E-05 |
| UTP18     | -0,981895205 | 6,37E-06 |
| BOP1      | -0,983072394 | 5,77E-08 |
| MRPS27    | -0,983270727 | 4,62E-07 |
| OPA3      | -0,984943648 | 0,000129 |
| PQBP1     | -0,98564126  | 0,000124 |
| TRMT61B   | -0,986619958 | 0,00049  |
| ZNF503    | -0,987259276 | 1,30E-06 |
| PSMD11    | -0,987509265 | 2,17E-07 |
| ARAF      | -0,987946494 | 0,00011  |
| KIAA1033  | -0,988058056 | 4,57E-05 |
| SH3PXD2B  | -0,988633495 | 9,16E-05 |
| EMC9      | -0,988769695 | 0,000823 |
| WIPF2     | -0,989305418 | 4,26E-06 |
| TYW3      | -0,989478355 | 3,38E-05 |
| ACTR5     | -0,990709795 | 0,000625 |
| AR        | -0,990779535 | 0,000111 |
| CNP       | -0,991471958 | 2,86E-05 |
| PSMD1     | -0,992533084 | 4,32E-06 |
| NFU1      | -0,992758512 | 0,000245 |
| DESI2     | -0,993242811 | 2,02E-05 |
| ZFR       | -0,996598889 | 0,000656 |
| NXN       | -0,99678682  | 0,000609 |
| GTF2A2    | -0,997653635 | 5,49E-06 |
| WDR44     | -0,998186096 | 0,000471 |
| EIF3M     | -0,998315551 | 9,93E-07 |
| MYEOV2    | -0,998949847 | 4,38E-05 |
| ARL3      | -0,999285052 | 1,01E-05 |
| AFF1      | -1,000010125 | 4,71E-05 |
| GEMIN4    | -1,00129503  | 1,82E-07 |
| NR3C1     | -1,001723987 | 2,52E-06 |
| SLC7A11   | -1,003252356 | 0,000913 |
| SERTAD2   | -1,003758802 | 5,12E-06 |
| PPP1R9B   | -1,004491898 | 7,69E-08 |
| GSK3A     | -1,004873239 | 4,22E-07 |
| DDX10     | -1,006089324 | 8,25E-07 |
| COL18A1   | -1,006182757 | 9,48E-08 |
| URI1      | -1,006751858 | 2,79E-08 |
| LINC00094 | -1,008224419 | 0,00035  |
| CEBPZOS   | -1,010050983 | 9,17E-05 |
| EPT1      | -1,010660393 | 6,46E-05 |

|          |              |          |
|----------|--------------|----------|
| NSMF     | -1,010732407 | 1,02E-06 |
| MPP6     | -1,011804262 | 8,29E-05 |
| CASP8    | -1,012402548 | 6,24E-05 |
| KATNB1   | -1,012467591 | 0,000288 |
| RASAL2   | -1,012849322 | 6,31E-05 |
| TNKS     | -1,013521212 | 7,18E-06 |
| PCM1     | -1,015059839 | 8,09E-07 |
| LONP2    | -1,015298563 | 1,78E-06 |
| WDR43    | -1,017141392 | 5,05E-05 |
| RAB9A    | -1,017589019 | 0,000336 |
| ARHGEF1  | -1,01866925  | 1,82E-07 |
| EMC7     | -1,019027358 | 0,000213 |
| QSER1    | -1,019694769 | 5,95E-07 |
| CCDC34   | -1,02176366  | 5,29E-05 |
| EXOC8    | -1,022678178 | 0,00011  |
| MPZL1    | -1,022900067 | 5,74E-08 |
| CCDC86   | -1,023136585 | 2,36E-08 |
| VRK2     | -1,023371766 | 8,28E-05 |
| LSM14A   | -1,023782496 | 7,80E-05 |
| SIX5     | -1,023960808 | 0,000707 |
| MED8     | -1,024924876 | 0,000343 |
| MAP2K4   | -1,024951063 | 6,41E-05 |
| ALCAM    | -1,025613357 | 8,52E-05 |
| PLEKHA3  | -1,026318164 | 0,00089  |
| LGALS1   | -1,026497198 | 0,000665 |
| MBOAT2   | -1,026613296 | 0,000289 |
| RIF1     | -1,02819853  | 5,85E-05 |
| LMF2     | -1,028523167 | 0,000292 |
| STXBP5   | -1,028700146 | 0,000679 |
| TTC31    | -1,029182582 | 0,000513 |
| PTMS     | -1,030021053 | 8,02E-05 |
| CSPP1    | -1,031778341 | 0,000722 |
| PPP1R12B | -1,032519884 | 0,000204 |
| TMEM261  | -1,032830149 | 1,29E-05 |
| NSL1     | -1,033669236 | 2,55E-05 |
| PTPN21   | -1,03479245  | 0,000849 |
| CLTA     | -1,035548909 | 1,08E-05 |
| TWISTNB  | -1,035600353 | 2,84E-05 |
| TACC1    | -1,036042309 | 1,24E-06 |
| PDDC1    | -1,037711388 | 0,000398 |
| SSX2IP   | -1,039342246 | 1,62E-05 |
| CYFIP1   | -1,040108986 | 8,94E-08 |
| VPS54    | -1,04093028  | 0,000362 |
| METTL16  | -1,042745966 | 4,68E-07 |
| PLCB4    | -1,044527426 | 0,00089  |
| PPTC7    | -1,047530283 | 5,96E-05 |
| PPP2CB   | -1,048361575 | 1,36E-06 |
| ERC1     | -1,051552367 | 5,99E-08 |
| TBCB     | -1,052750429 | 4,18E-07 |
| WDFY1    | -1,055466697 | 1,72E-06 |

|           |              |          |
|-----------|--------------|----------|
| ELOVL5    | -1,056419794 | 2,90E-08 |
| SLFN5     | -1,056498081 | 0,00088  |
| SPOP      | -1,056832821 | 3,83E-05 |
| FAR1      | -1,057031063 | 1,55E-05 |
| MOB1A     | -1,059086523 | 9,20E-06 |
| ATP11A    | -1,060514288 | 0,000229 |
| ALAS1     | -1,062409895 | 0,000125 |
| CORO1C    | -1,063084638 | 5,20E-07 |
| MIER1     | -1,063473221 | 4,10E-06 |
| NFKBIB    | -1,063757202 | 0,000724 |
| ACLY      | -1,063985657 | 1,64E-05 |
| ABR       | -1,064677571 | 8,27E-07 |
| DRAM1     | -1,065014602 | 0,000653 |
| RGP1      | -1,065265908 | 0,000385 |
| PRCP      | -1,0664224   | 2,32E-05 |
| TACC2     | -1,06645684  | 1,11E-05 |
| C2orf44   | -1,066538765 | 0,000745 |
| TSKU      | -1,067563    | 2,24E-05 |
| BAG4      | -1,067803093 | 6,02E-06 |
| BIRC6     | -1,068506068 | 3,66E-05 |
| TOMM5     | -1,068672589 | 6,13E-07 |
| OCIAD2    | -1,069156795 | 0,000213 |
| MACF1     | -1,069232761 | 1,87E-07 |
| RAI1      | -1,069868344 | 0,000722 |
| COX11     | -1,070821744 | 0,000491 |
| KDM6A     | -1,071599148 | 0,000899 |
| MED1      | -1,072098144 | 1,08E-08 |
| TUBG2     | -1,072240695 | 0,000955 |
| ELP3      | -1,073153586 | 7,14E-07 |
| ARL13B    | -1,073428719 | 1,40E-05 |
| MBOAT7    | -1,077396524 | 1,81E-05 |
| SLC25A6   | -1,077553318 | 2,40E-06 |
| SNRPB     | -1,079361031 | 4,24E-05 |
| TMEM147   | -1,079942296 | 4,70E-06 |
| EFR3B     | -1,080277758 | 6,44E-06 |
| PCYOX1    | -1,08067963  | 5,05E-05 |
| TALDO1    | -1,084293032 | 1,90E-06 |
| CRTAP     | -1,084605514 | 1,74E-06 |
| SPATA20   | -1,085405376 | 0,000746 |
| MPRIP     | -1,086087729 | 1,30E-06 |
| NGLY1     | -1,089188588 | 5,95E-05 |
| PNO1      | -1,091792187 | 0,000503 |
| LOC100506 | -1,091845339 | 0,000181 |
| RAB10     | -1,094745941 | 7,60E-09 |
| CAB39     | -1,095121417 | 6,65E-08 |
| URB1      | -1,096247207 | 4,26E-07 |
| SLC30A1   | -1,096327794 | 0,000148 |
| AHCTF1    | -1,098039817 | 3,15E-05 |
| MRPL10    | -1,098417798 | 4,62E-06 |
| NETO2     | -1,101382072 | 1,09E-08 |

|          |              |          |
|----------|--------------|----------|
| ACAT1    | -1,101654076 | 0,000954 |
| CYB5D1   | -1,102173077 | 8,76E-06 |
| SCRN1    | -1,105876722 | 4,46E-09 |
| HIF1A    | -1,108083751 | 1,05E-08 |
| SLC35F6  | -1,10983898  | 1,14E-05 |
| HR       | -1,110553022 | 0,000878 |
| ADRBK2   | -1,110694592 | 5,07E-05 |
| EIF2B4   | -1,112901598 | 6,76E-08 |
| MRPL33   | -1,113287208 | 4,06E-05 |
| PPME1    | -1,113610524 | 1,10E-05 |
| NLE1     | -1,114329299 | 0,000244 |
| SH3D19   | -1,115759703 | 6,20E-07 |
| MYO19    | -1,116765917 | 1,31E-05 |
| ABHD17B  | -1,117013236 | 3,51E-05 |
| TAOK1    | -1,117081754 | 3,46E-09 |
| MKNK2    | -1,117425358 | 3,01E-06 |
| MSL3     | -1,117740161 | 4,32E-06 |
| UAP1L1   | -1,118275799 | 0,000915 |
| CALCOCO2 | -1,11883913  | 1,26E-05 |
| AGFG1    | -1,119112694 | 5,45E-07 |
| KATNBL1  | -1,12032325  | 5,99E-05 |
| BICD2    | -1,120564505 | 3,27E-08 |
| RETSAT   | -1,121216366 | 9,65E-06 |
| GBE1     | -1,1213136   | 0,000493 |
| AIDA     | -1,121850873 | 0,000148 |
| NME1     | -1,121977403 | 7,36E-08 |
| KCTD9    | -1,123776027 | 2,33E-06 |
| ADAM17   | -1,124235469 | 3,31E-07 |
| DCDC2    | -1,124309486 | 7,47E-05 |
| ANKFY1   | -1,126720307 | 4,34E-08 |
| CCDC25   | -1,127925075 | 7,75E-07 |
| COPS7B   | -1,12819863  | 4,82E-06 |
| HIATL1   | -1,128978517 | 5,30E-07 |
| FTSJ1    | -1,129468107 | 5,39E-08 |
| PLEKHA5  | -1,12959734  | 1,97E-05 |
| BOD1L1   | -1,130463868 | 3,06E-09 |
| ELOVL2   | -1,130507211 | 0,000348 |
| SGCB     | -1,132193529 | 1,38E-05 |
| NEK2     | -1,133864983 | 1,87E-05 |
| SUCLA2   | -1,134869858 | 4,13E-05 |
| NOL6     | -1,136856213 | 9,95E-06 |
| ZBED5    | -1,138800191 | 1,26E-05 |
| IARS2    | -1,139816994 | 6,07E-10 |
| PTPN13   | -1,140617023 | 1,01E-05 |
| NBAS     | -1,14075191  | 2,28E-06 |
| CDC27    | -1,141040651 | 1,08E-09 |
| NUP43    | -1,141289195 | 4,52E-05 |
| ERICH1   | -1,142417993 | 1,25E-05 |
| ITPA     | -1,14401148  | 6,45E-06 |
| POFUT1   | -1,14440891  | 1,19E-06 |

|           |              |          |
|-----------|--------------|----------|
| FAM8A1    | -1,144442831 | 5,26E-05 |
| RAB11FIP1 | -1,146036358 | 6,01E-08 |
| ZNF343    | -1,14605633  | 2,49E-05 |
| PYGB      | -1,147363638 | 8,56E-11 |
| TMEM51    | -1,148324218 | 2,89E-05 |
| BET1L     | -1,149494438 | 4,01E-06 |
| ADSS      | -1,149737979 | 8,20E-07 |
| SUV39H1   | -1,150492619 | 7,68E-06 |
| TMEM123   | -1,151152353 | 7,11E-11 |
| LRRFIP1   | -1,152386794 | 3,08E-09 |
| FOPNL     | -1,153444225 | 6,13E-07 |
| RNF144A   | -1,154961718 | 0,000356 |
| PNPO      | -1,155983013 | 1,41E-08 |
| JADE2     | -1,156338038 | 9,33E-06 |
| CSTF3     | -1,156491541 | 3,32E-05 |
| BAX       | -1,158095509 | 0,000114 |
| CKB       | -1,158139239 | 1,86E-05 |
| LENG8     | -1,159152681 | 4,11E-07 |
| KLHL2     | -1,160232883 | 0,000717 |
| OTUD5     | -1,160402855 | 1,76E-06 |
| COPS8     | -1,161161191 | 7,21E-07 |
| EBLN3     | -1,161211806 | 1,27E-07 |
| LOC101927 | -1,161659161 | 0,000556 |
| LAMA3     | -1,161668798 | 0,000396 |
| TSPAN3    | -1,162147774 | 1,83E-07 |
| DTX2      | -1,162956188 | 6,53E-05 |
| BNIP2     | -1,163365868 | 6,60E-06 |
| FAM160B2  | -1,164002386 | 1,30E-06 |
| TSNAX     | -1,16510223  | 4,21E-06 |
| NONO      | -1,16536242  | 4,02E-07 |
| SPAST     | -1,166436281 | 1,61E-07 |
| TGOLN2    | -1,166590085 | 9,85E-08 |
| LRFN1     | -1,166623403 | 0,000151 |
| MAP4K3    | -1,167414742 | 1,07E-06 |
| KIF21A    | -1,168158704 | 6,90E-09 |
| RAB3GAP2  | -1,169673802 | 6,85E-08 |
| PRKAA1    | -1,170493248 | 5,94E-05 |
| GIN5      | -1,170784626 | 2,28E-07 |
| TRMT6     | -1,172460951 | 3,34E-08 |
| ARRB2     | -1,173133414 | 9,43E-10 |
| DYRK3     | -1,177515895 | 0,000906 |
| GPI       | -1,178565861 | 3,22E-06 |
| ABCD3     | -1,179450933 | 1,59E-07 |
| ERO1A     | -1,179745433 | 3,86E-08 |
| FAM195B   | -1,180104079 | 0,000591 |
| SPIN3     | -1,18022972  | 8,77E-05 |
| MINPP1    | -1,180254251 | 7,31E-06 |
| RAB36     | -1,181824237 | 0,000689 |
| ACTN4     | -1,183274551 | 5,07E-06 |
| TNS2      | -1,183391421 | 3,27E-07 |

|          |              |          |
|----------|--------------|----------|
| PPAP2C   | -1,183514212 | 8,46E-07 |
| DTL      | -1,184133021 | 1,92E-07 |
| NOL4L    | -1,185962175 | 1,56E-06 |
| MRPL45   | -1,186296325 | 1,22E-06 |
| LRPPRC   | -1,18759387  | 7,30E-12 |
| UBA2     | -1,189463335 | 4,03E-08 |
| CAPNS1   | -1,192363415 | 0,000386 |
| DIS3L    | -1,19334     | 1,48E-05 |
| ZCCHC7   | -1,193497361 | 8,59E-05 |
| MRM1     | -1,193933166 | 6,41E-05 |
| ZBED1    | -1,194679045 | 3,77E-06 |
| CPNE1    | -1,195506241 | 3,31E-09 |
| SEC14L1  | -1,19703044  | 5,18E-07 |
| NUDT19   | -1,197392704 | 1,58E-06 |
| TFB2M    | -1,199168344 | 0,000226 |
| SLC25A37 | -1,200954737 | 0,000103 |
| PTPN3    | -1,201449226 | 4,43E-06 |
| TANGO6   | -1,201517903 | 5,22E-05 |
| SGPP1    | -1,202817071 | 7,66E-06 |
| RPTOR    | -1,203013218 | 2,00E-10 |
| GNL3L    | -1,203117871 | 1,32E-08 |
| DHX37    | -1,20315065  | 5,62E-11 |
| BAG2     | -1,205156879 | 1,77E-06 |
| NSRP1    | -1,205401647 | 2,44E-07 |
| TLN1     | -1,206620801 | 6,99E-09 |
| CKAP4    | -1,208286224 | 2,36E-11 |
| SHPRH    | -1,209580904 | 0,000671 |
| PRDX3    | -1,211954878 | 2,73E-07 |
| MBTPS2   | -1,213316986 | 8,70E-07 |
| LRRC14   | -1,213462003 | 1,44E-06 |
| PAPD5    | -1,21374678  | 2,78E-07 |
| LTA4H    | -1,213803615 | 2,76E-07 |
| NUP133   | -1,214019326 | 2,40E-08 |
| THTPA    | -1,214141856 | 0,000479 |
| CSNK2A1  | -1,214264815 | 3,67E-09 |
| TEX261   | -1,214530715 | 3,03E-10 |
| ATE1     | -1,21490063  | 6,09E-07 |
| CAST     | -1,21540062  | 1,21E-08 |
| KDM5C    | -1,215586439 | 9,33E-11 |
| PTPRA    | -1,216522558 | 5,05E-06 |
| RIC1     | -1,21657255  | 8,01E-05 |
| MCU      | -1,2166589   | 2,31E-06 |
| SSH1     | -1,217253141 | 3,19E-07 |
| BDP1     | -1,218602223 | 1,70E-06 |
| SLC5A3   | -1,218722255 | 2,39E-06 |
| SAMD8    | -1,218894717 | 1,74E-05 |
| MAP4K2   | -1,219160451 | 0,000244 |
| VKORC1L1 | -1,221612361 | 4,31E-10 |
| TYMS     | -1,223145393 | 4,67E-09 |
| PECR     | -1,223437984 | 0,000231 |

|           |              |          |
|-----------|--------------|----------|
| MEGF8     | -1,223457007 | 2,07E-08 |
| PI4K2A    | -1,223667443 | 3,32E-05 |
| LGALS8    | -1,223747657 | 2,07E-05 |
| NBPF1     | -1,224464224 | 4,97E-06 |
| FSCN1     | -1,225004284 | 6,07E-09 |
| ERCC6L    | -1,226293864 | 3,68E-07 |
| NFIA      | -1,227272423 | 7,51E-06 |
| GEMIN6    | -1,227395288 | 1,81E-06 |
| GPX8      | -1,229341963 | 2,53E-06 |
| TOP2A     | -1,232094367 | 8,81E-06 |
| MTRF1L    | -1,232415763 | 8,50E-07 |
| STK17A    | -1,23294858  | 5,80E-05 |
| PEAK1     | -1,234483627 | 3,62E-07 |
| C9orf3    | -1,234933863 | 1,52E-05 |
| FOXN2     | -1,235047278 | 0,000137 |
| C10orf32  | -1,236113483 | 0,00023  |
| EIF2AK4   | -1,237244588 | 4,18E-09 |
| EPS8L2    | -1,237386504 | 0,000223 |
| ITSN2     | -1,239765427 | 4,98E-06 |
| AEBP2     | -1,239783868 | 7,14E-06 |
| TSHZ1     | -1,241781809 | 0,000182 |
| SLC20A1   | -1,244640193 | 9,92E-06 |
| TERF2     | -1,24526716  | 6,86E-07 |
| BBIP1     | -1,249163428 | 2,37E-06 |
| GALNT7    | -1,253062404 | 0,000386 |
| QSOX2     | -1,254710239 | 4,43E-05 |
| ENTPD4    | -1,254726919 | 2,31E-07 |
| CDK12     | -1,254889041 | 2,28E-11 |
| MTRR      | -1,255051892 | 0,000447 |
| HAUS6     | -1,257324737 | 3,49E-08 |
| PTPRG     | -1,257780221 | 5,05E-06 |
| IBTK      | -1,25827348  | 4,05E-10 |
| DYNC2H1   | -1,258714221 | 1,28E-05 |
| LDAH      | -1,259425834 | 2,00E-06 |
| ZNF580    | -1,26170559  | 1,52E-06 |
| MGST3     | -1,262802777 | 0,000276 |
| MC1R      | -1,264580406 | 0,000135 |
| THADA     | -1,267595125 | 1,07E-09 |
| FZD5      | -1,26924959  | 6,63E-07 |
| MED29     | -1,269503733 | 2,85E-11 |
| GNPAT     | -1,270048001 | 8,84E-10 |
| RABAC1    | -1,27023887  | 1,49E-05 |
| FTO       | -1,271596154 | 4,61E-08 |
| UBE2G1    | -1,273481237 | 6,45E-08 |
| KIF18A    | -1,273923323 | 8,48E-06 |
| PKM       | -1,27411376  | 2,21E-09 |
| LRRC37BP1 | -1,274569401 | 9,85E-05 |
| ACOT9     | -1,278913007 | 1,69E-06 |
| CARD8     | -1,278982945 | 1,96E-05 |
| ICE2      | -1,282501765 | 2,17E-09 |

|           |              |          |
|-----------|--------------|----------|
| POMZP3    | -1,28272373  | 5,10E-05 |
| CES2      | -1,283725415 | 5,66E-07 |
| METTL17   | -1,285659637 | 0,00038  |
| PHLDB3    | -1,285950741 | 0,000989 |
| TWF2      | -1,286384427 | 1,31E-09 |
| SMYD3     | -1,287420813 | 0,000461 |
| SHKBP1    | -1,287528589 | 5,21E-06 |
| PXDC1     | -1,289558867 | 0,000544 |
| JMJD6     | -1,290434067 | 0,000147 |
| LIN7C     | -1,291578527 | 2,78E-05 |
| IFNAR2    | -1,293968112 | 4,91E-05 |
| PPFIBP1   | -1,294484735 | 5,21E-08 |
| PIGW      | -1,295020401 | 2,52E-05 |
| B4GALT4   | -1,295310226 | 2,29E-07 |
| SHCBP1    | -1,295765493 | 1,60E-08 |
| MZF1      | -1,300083313 | 6,83E-05 |
| SHC1      | -1,300432321 | 1,72E-13 |
| IFNGR2    | -1,301684994 | 0,000129 |
| POLR3D    | -1,301906159 | 1,64E-05 |
| UTP6      | -1,302222977 | 1,65E-10 |
| SLC41A2   | -1,30404372  | 0,000162 |
| ANXA11    | -1,304197122 | 3,11E-09 |
| ABHD2     | -1,305272289 | 2,03E-06 |
| ATRN      | -1,308671936 | 3,05E-08 |
| APEX2     | -1,310622917 | 1,15E-06 |
| ADCK3     | -1,310982839 | 8,31E-05 |
| INHBB     | -1,311392358 | 0,000419 |
| ESCO2     | -1,312463963 | 1,08E-06 |
| DUSP3     | -1,313178251 | 4,13E-09 |
| BTBD3     | -1,316207615 | 2,52E-07 |
| COQ10A    | -1,316495818 | 0,00016  |
| ARHGAP12  | -1,317191542 | 1,30E-05 |
| PDHX      | -1,319735649 | 9,12E-08 |
| TAF1      | -1,321558029 | 1,01E-06 |
| TNFRSF10A | -1,32159718  | 0,000186 |
| RNF111    | -1,32404279  | 2,00E-10 |
| RPGRIP1L  | -1,324297851 | 7,65E-06 |
| MT1X      | -1,324648172 | 5,98E-05 |
| STARD3NL  | -1,325819009 | 0,000145 |
| CNEP1R1   | -1,326371193 | 0,000186 |
| BBX       | -1,326874157 | 1,53E-07 |
| IGF2BP2   | -1,327009075 | 1,92E-05 |
| UTRN      | -1,32806868  | 6,97E-05 |
| TPP1      | -1,331259065 | 2,54E-06 |
| FKBP1A    | -1,332275149 | 4,79E-09 |
| RBFOX2    | -1,334585622 | 7,28E-12 |
| IKBKB     | -1,335375736 | 3,28E-06 |
| NF1       | -1,335741889 | 5,74E-07 |
| PGK1      | -1,336531487 | 1,55E-11 |
| ASB1      | -1,33732112  | 5,18E-09 |



|           |              |          |
|-----------|--------------|----------|
| LACTB2    | -1,339566221 | 1,51E-05 |
| TBCE      | -1,339665437 | 1,14E-07 |
| AKAP10    | -1,340209741 | 3,16E-05 |
| SPAG9     | -1,341824098 | 7,91E-08 |
| TMEM245   | -1,34221185  | 3,74E-09 |
| MAPKBP1   | -1,342606243 | 0,000772 |
| CEP89     | -1,345968229 | 1,86E-06 |
| CYSTM1    | -1,347039792 | 1,06E-09 |
| PKI55     | -1,34961384  | 0,000169 |
| ACADVL    | -1,352201655 | 1,52E-06 |
| AGFG2     | -1,352684056 | 9,42E-06 |
| MOSPD2    | -1,353189008 | 5,88E-05 |
| LAMA5     | -1,356441787 | 6,37E-15 |
| RHOT1     | -1,357054796 | 5,80E-10 |
| ERI1      | -1,359339727 | 1,30E-09 |
| APP       | -1,359366211 | 4,16E-15 |
| IGBP1     | -1,359602392 | 3,70E-06 |
| RPL23AP53 | -1,360649177 | 0,000739 |
| GLA       | -1,360831677 | 0,000549 |
| TOM1L2    | -1,360921601 | 5,47E-06 |
| RPS6KA3   | -1,361261819 | 1,39E-11 |
| PDLIM1    | -1,363025391 | 5,67E-12 |
| PSD3      | -1,363771036 | 1,36E-08 |
| RICTOR    | -1,36428351  | 1,78E-06 |
| RAB2B     | -1,364328239 | 1,03E-06 |
| RASSF3    | -1,364872111 | 1,14E-06 |
| MGST1     | -1,36633906  | 6,00E-08 |
| BCL2L2    | -1,370758213 | 2,29E-06 |
| USP28     | -1,371660943 | 7,69E-08 |
| EML4      | -1,371789409 | 5,49E-15 |
| BLMH      | -1,372644713 | 7,15E-11 |
| LRRC49    | -1,372982986 | 1,92E-06 |
| HDHD1     | -1,374248065 | 3,12E-05 |
| SLC41A1   | -1,375894505 | 8,66E-09 |
| SPATS2L   | -1,376145764 | 4,65E-09 |
| PDE8A     | -1,377519818 | 9,97E-08 |
| ENTHD2    | -1,379353129 | 0,000529 |
| CLU       | -1,383154096 | 0,000315 |
| NIPA2     | -1,383264638 | 3,71E-08 |
| TMEM2     | -1,383445011 | 2,27E-08 |
| ATP7B     | -1,388962466 | 0,000225 |
| MID1IP1   | -1,389753438 | 0,000131 |
| MLLT3     | -1,390747819 | 1,12E-06 |
| PTAR1     | -1,391030824 | 3,29E-08 |
| SH3BP4    | -1,393586145 | 4,24E-08 |
| FCHO2     | -1,394074007 | 0,000102 |
| DENND4C   | -1,39408203  | 1,17E-09 |
| ARV1      | -1,394842008 | 3,11E-06 |
| PCNXL2    | -1,394848821 | 3,59E-07 |
| PHC1      | -1,395964869 | 1,15E-07 |

|          |              |          |
|----------|--------------|----------|
| CHMP2A   | -1,397628083 | 0,000274 |
| PNKD     | -1,401064775 | 7,57E-07 |
| CHST14   | -1,402840259 | 6,80E-06 |
| ETV6     | -1,405125414 | 4,99E-08 |
| ATP5SL   | -1,405411772 | 3,20E-09 |
| RHBDF2   | -1,406309125 | 1,23E-10 |
| HPS5     | -1,406713364 | 1,49E-08 |
| AP2A2    | -1,407393177 | 1,54E-11 |
| CNST     | -1,408195042 | 0,000118 |
| STK4     | -1,408418299 | 1,44E-12 |
| ETAA1    | -1,408550795 | 2,90E-06 |
| PBK      | -1,410033579 | 6,01E-06 |
| NOP10    | -1,414210642 | 1,23E-13 |
| GPKOW    | -1,415063042 | 1,73E-06 |
| KYNU     | -1,415853348 | 0,000316 |
| SOC5     | -1,416202295 | 3,54E-07 |
| EFR3A    | -1,419042202 | 2,07E-05 |
| TMEM164  | -1,419130624 | 3,96E-12 |
| WWC2     | -1,419302461 | 8,75E-07 |
| ARMC9    | -1,419400941 | 4,00E-08 |
| B9D2     | -1,420991266 | 8,39E-05 |
| EXOC6B   | -1,42107586  | 1,34E-06 |
| PLEK2    | -1,422621055 | 2,53E-05 |
| PRICKLE3 | -1,422706101 | 2,27E-06 |
| TBC1D25  | -1,422829785 | 0,000702 |
| FUZ      | -1,423860434 | 9,21E-05 |
| ERCC1    | -1,424267765 | 1,97E-11 |
| FLVCR1   | -1,42446126  | 9,12E-05 |
| LCLAT1   | -1,427675049 | 4,83E-11 |
| PRMT3    | -1,428505386 | 1,23E-07 |
| CDC42BPA | -1,429958218 | 1,30E-06 |
| PLEKHG2  | -1,430839343 | 1,79E-10 |
| MAP7D1   | -1,431741322 | 2,54E-08 |
| IPO7     | -1,432350967 | 7,84E-10 |
| ZNF584   | -1,432536418 | 1,72E-08 |
| CD59     | -1,433286177 | 0,000137 |
| ZNF780A  | -1,433813142 | 3,08E-08 |
| SEPN1    | -1,435871852 | 2,59E-14 |
| RHOBTB2  | -1,435934227 | 8,36E-06 |
| FLNA     | -1,438116956 | 5,78E-11 |
| RAI14    | -1,438270988 | 2,06E-07 |
| RTN4     | -1,444137601 | 1,96E-12 |
| CD99     | -1,444339857 | 1,91E-11 |
| COPRS    | -1,445123027 | 3,43E-12 |
| NRBP2    | -1,44757961  | 4,28E-05 |
| MFHAS1   | -1,448304833 | 4,35E-14 |
| HEXIM2   | -1,449144704 | 0,000332 |
| GOSR1    | -1,450032028 | 9,30E-11 |
| SNHG3    | -1,450889391 | 3,40E-05 |
| ATP6AP2  | -1,451943018 | 9,18E-09 |

|           |              |          |
|-----------|--------------|----------|
| EDEM1     | -1,452452666 | 6,11E-09 |
| HEXIM1    | -1,4524929   | 1,59E-08 |
| ADCY3     | -1,45398297  | 5,59E-14 |
| TNPO1     | -1,456091705 | 4,17E-11 |
| PPP2R3B   | -1,456655091 | 0,000622 |
| C5        | -1,458348764 | 0,000617 |
| TFE3      | -1,458690864 | 6,58E-13 |
| SNX12     | -1,458826918 | 2,00E-05 |
| SLC46A1   | -1,459034005 | 5,18E-11 |
| ABTB2     | -1,459146227 | 1,80E-08 |
| TMEM206   | -1,460753088 | 0,00041  |
| C11orf54  | -1,462004081 | 0,000345 |
| TMEM120f  | -1,463904663 | 3,09E-08 |
| PMAIP1    | -1,464331587 | 0,000403 |
| TBC1D20   | -1,465984226 | 3,33E-10 |
| DIEXF     | -1,466763763 | 3,60E-06 |
| SMC1A     | -1,467289387 | 1,75E-11 |
| FHOD1     | -1,468116902 | 1,04E-12 |
| LPGAT1    | -1,468408165 | 5,38E-10 |
| POLR2L    | -1,470921574 | 6,74E-12 |
| FZD7      | -1,471108511 | 1,12E-07 |
| MEF2D     | -1,476066461 | 1,09E-05 |
| SLC12A7   | -1,477401578 | 9,60E-10 |
| ST6GALNAc | -1,479643563 | 3,02E-07 |
| SERGEF    | -1,47998492  | 8,45E-05 |
| ADCY7     | -1,481220197 | 7,08E-08 |
| YIPF6     | -1,4819893   | 1,33E-10 |
| STX1A     | -1,48423699  | 8,53E-07 |
| SEPT2     | -1,485649412 | 4,61E-15 |
| ASRGL1    | -1,487151402 | 0,000105 |
| PCCA      | -1,48726186  | 7,76E-06 |
| GRHPR     | -1,491468899 | 3,14E-07 |
| ACBD5     | -1,49235345  | 9,03E-09 |
| METTL3    | -1,492861916 | 2,82E-11 |
| EFHD2     | -1,495333651 | 6,57E-07 |
| PLP2      | -1,495352038 | 3,62E-12 |
| CIC       | -1,497259435 | 4,21E-14 |
| LAS1L     | -1,498164389 | 2,03E-10 |
| ADCK4     | -1,498176347 | 2,10E-07 |
| CACNA2D1  | -1,501377698 | 2,94E-07 |
| SPRED2    | -1,50220177  | 2,73E-13 |
| NEDD4L    | -1,50240335  | 4,31E-07 |
| TXLNA     | -1,502796586 | 4,49E-10 |
| GCLC      | -1,504077243 | 1,65E-10 |
| POLR3G    | -1,504688077 | 1,54E-06 |
| FUT10     | -1,505178198 | 0,000932 |
| ARL2BP    | -1,506374673 | 3,41E-11 |
| TTC21B    | -1,506819177 | 2,08E-05 |
| ZFAND5    | -1,509055584 | 1,15E-13 |
| SLC30A7   | -1,509718261 | 2,47E-07 |

|          |              |          |
|----------|--------------|----------|
| NAV2     | -1,509983598 | 1,92E-05 |
| BACH1    | -1,511943407 | 2,98E-07 |
| ROCK2    | -1,512206259 | 2,48E-10 |
| TMEM147- | -1,512490891 | 2,96E-05 |
| PARVB    | -1,514404754 | 2,63E-08 |
| CTSC     | -1,515395175 | 9,93E-09 |
| MED14    | -1,515453974 | 1,28E-14 |
| SMARCD3  | -1,516085048 | 5,44E-06 |
| CELSR1   | -1,518769824 | 2,81E-14 |
| TMEM41B  | -1,521335362 | 4,53E-09 |
| UBQLN2   | -1,522317315 | 5,63E-14 |
| ASAP1    | -1,522335216 | 2,14E-14 |
| SYMPK    | -1,523340141 | 4,41E-17 |
| ITPRIPL2 | -1,524722633 | 4,35E-10 |
| ZIC2     | -1,526375326 | 0,000206 |
| KSR2     | -1,527623608 | 0,000174 |
| DOCK9    | -1,52815618  | 2,80E-08 |
| TRAF5    | -1,529014529 | 4,52E-05 |
| GALM     | -1,529615068 | 0,000289 |
| IRF1     | -1,52981743  | 2,90E-05 |
| C1GALT1  | -1,530858504 | 2,52E-11 |
| WWC3     | -1,531177301 | 1,05E-10 |
| IRS2     | -1,532074924 | 0,000209 |
| CDR2L    | -1,532827189 | 1,75E-05 |
| VOPP1    | -1,533338207 | 2,73E-09 |
| STXBP4   | -1,533777845 | 4,30E-07 |
| NT5DC3   | -1,536910063 | 2,31E-06 |
| ITM2C    | -1,538325432 | 1,09E-08 |
| SKIL     | -1,540399839 | 7,46E-09 |
| TTC33    | -1,541005434 | 2,97E-05 |
| TEAD1    | -1,541119484 | 1,07E-11 |
| CCDC113  | -1,542101602 | 5,12E-06 |
| RPS6KA5  | -1,542464242 | 0,000146 |
| CBR1     | -1,542797136 | 4,24E-08 |
| CWC25    | -1,542820877 | 1,73E-10 |
| ID2      | -1,543762128 | 4,00E-05 |
| CDCA7    | -1,543882463 | 0,000524 |
| EXT1     | -1,5444812   | 1,15E-07 |
| EPN2     | -1,547041731 | 6,54E-13 |
| PNP      | -1,547373819 | 1,17E-14 |
| C20orf96 | -1,547640775 | 0,000882 |
| APH1B    | -1,547686368 | 0,000296 |
| FERMT2   | -1,551902174 | 3,12E-10 |
| MARVELD1 | -1,552321975 | 8,35E-09 |
| PRAF2    | -1,553156442 | 8,44E-05 |
| SSH2     | -1,55343478  | 8,51E-08 |
| AKAP17A  | -1,554785895 | 1,77E-06 |
| SH2B3    | -1,55527668  | 3,93E-05 |
| ME2      | -1,556615066 | 1,76E-12 |
| GPATCH11 | -1,556669233 | 3,55E-07 |

|           |              |          |
|-----------|--------------|----------|
| GNG12     | -1,558020562 | 1,21E-10 |
| PEPD      | -1,558225077 | 1,06E-11 |
| ALDH1B1   | -1,5588461   | 2,55E-17 |
| MYO1B     | -1,560865485 | 1,69E-17 |
| SLC17A5   | -1,562476636 | 0,000284 |
| NCEH1     | -1,564037848 | 8,19E-07 |
| PIP4K2B   | -1,566166558 | 2,09E-15 |
| IRS1      | -1,5705276   | 2,59E-16 |
| HCCS      | -1,577537256 | 2,12E-09 |
| MALT1     | -1,578005733 | 6,05E-12 |
| USP11     | -1,579282799 | 1,71E-14 |
| TARBP1    | -1,58022166  | 1,35E-07 |
| TPM1      | -1,581677568 | 1,73E-07 |
| CYB5B     | -1,58219333  | 3,68E-09 |
| LINC01128 | -1,584546497 | 0,000227 |
| PCNA      | -1,584614436 | 1,18E-19 |
| SH3RF1    | -1,586175273 | 7,95E-05 |
| CAPRIN2   | -1,586265028 | 2,18E-06 |
| LGALS3    | -1,58855     | 0,00022  |
| CCND3     | -1,588672157 | 0,000481 |
| USP9X     | -1,589546534 | 9,91E-12 |
| SAT2      | -1,590985682 | 7,23E-07 |
| SWAP70    | -1,591814587 | 2,68E-10 |
| EHD3      | -1,592995346 | 1,79E-05 |
| LITAF     | -1,593395501 | 1,85E-07 |
| LOC728743 | -1,594022837 | 0,000168 |
| MAP3K10   | -1,594577698 | 4,43E-08 |
| GBAS      | -1,596921867 | 0,000138 |
| RASA3     | -1,597316607 | 3,03E-06 |
| RNF135    | -1,597820857 | 1,13E-06 |
| AQR       | -1,598244519 | 1,99E-17 |
| ECHDC1    | -1,599683916 | 5,15E-08 |
| EGLN1     | -1,600865662 | 4,59E-14 |
| ANTXR1    | -1,603100505 | 3,57E-19 |
| PFAS      | -1,604801887 | 1,43E-19 |
| CD46      | -1,606864074 | 1,93E-13 |
| AVPI1     | -1,609537621 | 1,77E-07 |
| FRG1HP    | -1,611491831 | 0,000287 |
| FNTA      | -1,613414319 | 2,99E-13 |
| PANK2     | -1,614556889 | 8,10E-12 |
| MCM8      | -1,615035986 | 1,11E-13 |
| YAP1      | -1,616587319 | 5,73E-13 |
| IDS       | -1,618150142 | 2,09E-06 |
| HLA-A     | -1,624676828 | 1,35E-09 |
| UGGT2     | -1,624753397 | 3,86E-07 |
| LRP8      | -1,628736708 | 9,28E-11 |
| MAPKAPK5  | -1,62928973  | 2,49E-10 |
| CASP9     | -1,630889229 | 0,00049  |
| KLF3      | -1,632123452 | 1,00E-08 |
| TMEM104   | -1,635111789 | 6,12E-08 |

|          |              |          |
|----------|--------------|----------|
| ASXL2    | -1,640178463 | 1,83E-13 |
| CASK     | -1,641962506 | 3,85E-15 |
| SAMHD1   | -1,642255    | 0,000673 |
| PLEKHA2  | -1,642590545 | 6,43E-05 |
| HEATR1   | -1,644300948 | 1,46E-13 |
| RCAN3    | -1,644641717 | 0,00049  |
| DOK4     | -1,645424244 | 6,00E-11 |
| LAMB1    | -1,645612365 | 1,96E-17 |
| FEZ2     | -1,646297839 | 1,70E-14 |
| SAT1     | -1,647004148 | 1,31E-08 |
| C16orf70 | -1,650107384 | 1,90E-08 |
| FGD6     | -1,656199447 | 3,67E-12 |
| RAB34    | -1,659634245 | 4,87E-10 |
| ATP5G1   | -1,663349179 | 3,88E-13 |
| DHRX     | -1,665578564 | 9,83E-08 |
| WDR54    | -1,666490198 | 5,45E-09 |
| GANC     | -1,669741473 | 1,73E-05 |
| CASC4    | -1,670680598 | 1,22E-15 |
| DDX52    | -1,674001591 | 2,63E-15 |
| RBPMS    | -1,674823575 | 5,22E-15 |
| BMP1     | -1,675351202 | 2,33E-11 |
| LDLRAD3  | -1,675355833 | 9,73E-09 |
| MLPH     | -1,676371389 | 1,05E-15 |
| NUAK1    | -1,679268799 | 3,20E-12 |
| STK17B   | -1,679407399 | 3,63E-08 |
| NEIL2    | -1,679494235 | 1,64E-11 |
| LMO7     | -1,68042288  | 5,65E-11 |
| NIPA1    | -1,682374827 | 1,51E-15 |
| PCED1A   | -1,684706819 | 5,88E-09 |
| ARSK     | -1,688226066 | 9,81E-05 |
| PM20D2   | -1,692972787 | 5,32E-07 |
| HERC2    | -1,69407679  | 9,90E-21 |
| DENND5A  | -1,694155189 | 1,06E-07 |
| TEP1     | -1,694310035 | 1,68E-06 |
| PSAT1    | -1,695567955 | 0,000755 |
| CD99L2   | -1,698978623 | 1,23E-08 |
| CLTCL1   | -1,700527389 | 0,000236 |
| PLD1     | -1,700984609 | 1,48E-07 |
| SYT1     | -1,701216858 | 5,30E-07 |
| ID1      | -1,702851199 | 2,44E-05 |
| PFKP     | -1,70553494  | 6,78E-11 |
| KIAA0930 | -1,705807424 | 2,33E-09 |
| STIM1    | -1,708274641 | 1,02E-15 |
| AP1S2    | -1,708935821 | 1,09E-09 |
| MB21D1   | -1,713007748 | 8,36E-05 |
| TOX2     | -1,714201094 | 6,95E-09 |
| SLC4A7   | -1,71471726  | 1,14E-10 |
| PHF19    | -1,715531329 | 1,93E-16 |
| FAM219A  | -1,716600747 | 9,04E-05 |
| PLS3     | -1,717516746 | 2,24E-15 |

|          |              |          |
|----------|--------------|----------|
| GALC     | -1,721237104 | 2,46E-05 |
| CRYZ     | -1,721413956 | 1,77E-07 |
| CTSB     | -1,721856009 | 4,18E-08 |
| ABHD15   | -1,723376625 | 2,49E-08 |
| HGSNAT   | -1,725073197 | 7,73E-07 |
| COASY    | -1,729305868 | 3,15E-18 |
| PRKAR2A  | -1,729384774 | 3,81E-09 |
| ARHGEF28 | -1,729682604 | 2,30E-10 |
| TPCN1    | -1,732472698 | 1,80E-13 |
| ATP2B1   | -1,732847295 | 2,12E-16 |
| SESTD1   | -1,736235618 | 1,78E-07 |
| AP2B1    | -1,737690649 | 1,28E-15 |
| WDR81    | -1,738055406 | 2,10E-09 |
| FRAS1    | -1,738064337 | 2,03E-12 |
| ATP8B2   | -1,738888321 | 2,31E-12 |
| HDAC6    | -1,742480542 | 9,50E-11 |
| HACD1    | -1,745965611 | 7,25E-06 |
| PLIN2    | -1,74658769  | 1,64E-06 |
| DNAJC18  | -1,746940449 | 6,75E-05 |
| SEMA4B   | -1,749875125 | 1,59E-13 |
| PITPNM1  | -1,75168531  | 2,42E-09 |
| GPR137B  | -1,752436511 | 6,70E-06 |
| PEX6     | -1,755942581 | 0,000916 |
| MYADM    | -1,758385078 | 1,21E-06 |
| IFT81    | -1,760411989 | 6,53E-14 |
| AKIP1    | -1,763194778 | 4,31E-11 |
| LGALS1   | -1,764471088 | 5,93E-08 |
| ULK2     | -1,766553732 | 1,33E-05 |
| LRP6     | -1,77284123  | 3,64E-17 |
| PDZD8    | -1,77330563  | 9,77E-20 |
| PLD3     | -1,774335905 | 3,06E-10 |
| KCTD7    | -1,775221947 | 1,71E-05 |
| TUBGCP5  | -1,777019493 | 3,49E-13 |
| PARVA    | -1,779912657 | 6,03E-11 |
| SEC23A   | -1,783434265 | 1,49E-14 |
| SPTBN1   | -1,785485318 | 1,38E-26 |
| CDC42EP4 | -1,787684427 | 2,02E-10 |
| P3H1     | -1,788750999 | 1,85E-10 |
| RELB     | -1,789553789 | 4,14E-05 |
| RANGRF   | -1,789631223 | 1,58E-09 |
| TRMT11   | -1,789846138 | 0,000893 |
| FARP2    | -1,793019592 | 1,07E-09 |
| IFNGR1   | -1,793943677 | 2,38E-13 |
| PTDSS2   | -1,793985556 | 1,61E-06 |
| GALNT14  | -1,795905617 | 1,56E-16 |
| SDCCAG8  | -1,798735939 | 5,81E-08 |
| STOX2    | -1,800382616 | 0,000138 |
| HSPA2    | -1,80057969  | 7,63E-05 |
| PLOD2    | -1,801731104 | 1,35E-20 |
| PATL1    | -1,805216039 | 2,72E-16 |

|          |              |          |
|----------|--------------|----------|
| TLN2     | -1,807382169 | 1,96E-07 |
| FABP5    | -1,808316959 | 6,78E-21 |
| SNHG25   | -1,809044927 | 1,93E-11 |
| HOXB7    | -1,809735751 | 1,65E-10 |
| FLNB     | -1,810415772 | 8,62E-11 |
| B4GALT6  | -1,810819789 | 4,16E-07 |
| CPPED1   | -1,811293592 | 3,93E-14 |
| PITPNM2  | -1,813354734 | 2,69E-08 |
| NAB1     | -1,816900272 | 2,57E-09 |
| GOLGA7B  | -1,817601805 | 0,000925 |
| CDC14B   | -1,818668824 | 3,59E-10 |
| P3H2     | -1,822713825 | 4,45E-11 |
| ATAD5    | -1,823704593 | 3,91E-07 |
| ADA      | -1,827392993 | 3,61E-07 |
| GFPT2    | -1,828044853 | 1,24E-05 |
| EFNA5    | -1,828515849 | 1,99E-12 |
| MAP2K6   | -1,829320715 | 2,03E-10 |
| MAP3K14  | -1,830015664 | 0,000339 |
| MARCKS   | -1,830223431 | 4,22E-14 |
| WLS      | -1,830380971 | 4,39E-06 |
| ZCCHC24  | -1,831395004 | 0,000658 |
| TRIM5    | -1,832437963 | 5,45E-05 |
| SLC35B4  | -1,832982396 | 7,19E-21 |
| ENO2     | -1,83696129  | 1,00E-06 |
| VCL      | -1,83827484  | 3,31E-08 |
| KIF3C    | -1,840315887 | 2,64E-11 |
| ELL2     | -1,840355889 | 1,80E-07 |
| ANKMY2   | -1,840649248 | 2,00E-09 |
| SLC39A10 | -1,841619864 | 1,73E-15 |
| RNF145   | -1,84447694  | 3,30E-06 |
| PRTG     | -1,850249785 | 1,61E-05 |
| SEMA4F   | -1,850465987 | 0,000475 |
| KLHL15   | -1,85259595  | 4,45E-06 |
| PLAGL1   | -1,853327647 | 2,78E-06 |
| STX2     | -1,855084111 | 8,10E-13 |
| DAGLA    | -1,857202789 | 5,03E-05 |
| CRLF3    | -1,857758097 | 7,73E-08 |
| LBR      | -1,859514993 | 1,33E-16 |
| C19orf12 | -1,862028105 | 1,82E-13 |
| CDON     | -1,862034737 | 0,000535 |
| EXTL2    | -1,863196479 | 3,99E-07 |
| CITED4   | -1,866200711 | 2,55E-06 |
| DEDD2    | -1,866718787 | 1,58E-12 |
| ACACA    | -1,866860515 | 7,24E-26 |
| TCIRG1   | -1,868922834 | 8,86E-10 |
| MYO10    | -1,871461001 | 5,53E-17 |
| FNDC3B   | -1,871862031 | 9,50E-22 |
| MAML3    | -1,873578674 | 3,70E-09 |
| ADGRE5   | -1,873921652 | 8,53E-07 |
| KLF12    | -1,874630933 | 3,62E-07 |



|           |              |          |
|-----------|--------------|----------|
| MCFD2     | -1,875616628 | 6,37E-23 |
| SNAP25    | -1,877203442 | 0,000306 |
| APOBEC3B  | -1,878215942 | 3,14E-08 |
| USP40     | -1,878454161 | 2,91E-12 |
| ANO6      | -1,879995862 | 1,98E-14 |
| SNHG10    | -1,8803793   | 0,000367 |
| ADCY9     | -1,880983235 | 7,71E-10 |
| ZNF319    | -1,883277919 | 0,000324 |
| TMEM106f  | -1,884265603 | 8,83E-18 |
| ITPR1     | -1,885390757 | 1,55E-09 |
| LINC00641 | -1,88862155  | 2,07E-05 |
| CPOX      | -1,888622609 | 7,41E-07 |
| BCL3      | -1,890195811 | 3,99E-10 |
| CARNMT1   | -1,896450682 | 5,18E-11 |
| FUT11     | -1,896942712 | 5,57E-08 |
| TJP1      | -1,902026983 | 3,54E-11 |
| LTBP2     | -1,906781983 | 0,000347 |
| SNAI1     | -1,916480893 | 0,000808 |
| LHFPL2    | -1,918178397 | 6,94E-17 |
| RAB27B    | -1,92063752  | 1,34E-14 |
| IMPA1     | -1,92175894  | 5,14E-12 |
| FAM169A   | -1,925189015 | 0,000176 |
| CEP170    | -1,926713899 | 5,20E-22 |
| SORBS3    | -1,927049216 | 1,03E-21 |
| ABCB10    | -1,92836782  | 3,15E-12 |
| ABCB7     | -1,937458986 | 4,44E-10 |
| WNT7B     | -1,940082379 | 3,38E-07 |
| PLEC      | -1,9404649   | 4,39E-06 |
| IER5L     | -1,940669875 | 1,26E-07 |
| MPDZ      | -1,946574282 | 2,57E-10 |
| SPIN4     | -1,948938679 | 7,40E-08 |
| ACER3     | -1,952843901 | 2,33E-21 |
| TNFRSF10B | -1,954141224 | 8,66E-20 |
| DIAPH2    | -1,95528438  | 5,73E-12 |
| GATA2     | -1,956724759 | 5,07E-09 |
| GAREML    | -1,956868657 | 5,04E-07 |
| TXNRD1    | -1,963784157 | 1,14E-08 |
| CA11      | -1,964360122 | 8,96E-05 |
| GID4      | -1,966099472 | 1,60E-10 |
| SELM      | -1,96699303  | 2,72E-07 |
| EVI5      | -1,967468872 | 4,53E-09 |
| DMTN      | -1,967570399 | 1,22E-17 |
| BICD1     | -1,968209493 | 8,60E-13 |
| TREX1     | -1,968231976 | 6,16E-06 |
| JAK1      | -1,972371846 | 3,34E-16 |
| PIM2      | -1,972865192 | 1,49E-12 |
| BASP1     | -1,976973042 | 0,000362 |
| RDX       | -1,978487247 | 6,23E-17 |
| TXN       | -1,981320441 | 3,61E-11 |
| NR2F1     | -1,981798515 | 2,36E-08 |

|           |              |          |
|-----------|--------------|----------|
| KIAA0355  | -1,984411351 | 5,18E-14 |
| SLC9A7    | -1,984962432 | 1,57E-06 |
| PTPN14    | -1,985968006 | 3,32E-12 |
| FAM161A   | -1,988511075 | 1,66E-06 |
| PTPRJ     | -1,99006897  | 1,05E-15 |
| PLS1      | -1,991509185 | 1,14E-14 |
| WTIP      | -1,995283934 | 0,00025  |
| CAMK1D    | -1,999239538 | 1,74E-10 |
| SLC39A14  | -2,008902968 | 1,01E-06 |
| FN3K      | -2,013039019 | 0,000969 |
| SIPA1L3   | -2,014930527 | 1,01E-27 |
| FOSL2     | -2,017574683 | 1,83E-11 |
| USB1      | -2,017891546 | 7,96E-09 |
| HFE       | -2,020454263 | 0,000151 |
| FAM46A    | -2,02177754  | 3,95E-05 |
| GLIS2     | -2,024169235 | 2,97E-19 |
| DPYSL2    | -2,025916877 | 1,11E-10 |
| SYDE1     | -2,029468907 | 3,26E-09 |
| EPHB2     | -2,033700811 | 9,48E-20 |
| STXBP1    | -2,033803018 | 3,83E-19 |
| CASC10    | -2,03416681  | 2,01E-05 |
| VAMP2     | -2,038230837 | 4,68E-17 |
| TRIM16L   | -2,040591557 | 2,41E-05 |
| SRGAP2D   | -2,042150444 | 1,19E-05 |
| ITPRIP    | -2,042873958 | 3,38E-05 |
| GNPDA2    | -2,043463723 | 1,72E-06 |
| IL6ST     | -2,048621492 | 2,65E-17 |
| CHORDC1   | -2,050058514 | 6,49E-20 |
| STEAP3    | -2,053866365 | 6,98E-13 |
| ELF3      | -2,058943832 | 0,000131 |
| IFIT5     | -2,065663701 | 1,76E-05 |
| TYMP      | -2,066829869 | 8,88E-05 |
| PVR       | -2,067725744 | 3,68E-08 |
| LDHA      | -2,070492277 | 3,00E-32 |
| CCNJL     | -2,072319326 | 3,36E-07 |
| DYNLT3    | -2,074192817 | 7,48E-06 |
| PRPS1     | -2,078758947 | 5,18E-18 |
| ADGRB2    | -2,085770917 | 1,29E-07 |
| KCTD17    | -2,088166835 | 9,22E-07 |
| NUMBL     | -2,088860703 | 9,22E-23 |
| SHISA4    | -2,089676761 | 0,000805 |
| EID2      | -2,090988157 | 1,72E-18 |
| FUT4      | -2,091635651 | 1,01E-05 |
| STAT3     | -2,093435436 | 1,19E-09 |
| LOC284454 | -2,096033919 | 0,00062  |
| TCF12     | -2,097484248 | 2,18E-13 |
| SDC1      | -2,100044417 | 3,16E-22 |
| CPEB1     | -2,101870045 | 0,000236 |
| ARNT2     | -2,1036601   | 2,53E-17 |
| KIAA0319  | -2,107474341 | 0,000447 |

|           |              |          |
|-----------|--------------|----------|
| PGD       | -2,113527306 | 1,72E-11 |
| PRKAA2    | -2,116527031 | 2,78E-15 |
| SIM2      | -2,116797235 | 4,30E-09 |
| KCNAB2    | -2,121467026 | 0,000103 |
| PTCH1     | -2,121757568 | 2,09E-09 |
| ATP1B1    | -2,122580588 | 7,52E-13 |
| ZDHC1     | -2,12500203  | 0,000111 |
| LASP1     | -2,128248719 | 9,11E-15 |
| FBXO17    | -2,130060965 | 8,95E-10 |
| HSPG2     | -2,130449704 | 1,03E-16 |
| DNAJC24   | -2,130620812 | 7,70E-12 |
| SYNJ2     | -2,132120889 | 3,09E-19 |
| CDS2      | -2,135851584 | 1,93E-21 |
| PRTFDC1   | -2,138102366 | 3,01E-08 |
| THBS1     | -2,140866332 | 6,31E-08 |
| DLGAP1-AS | -2,144254388 | 0,000198 |
| CAPG      | -2,144705251 | 6,96E-18 |
| IL13RA1   | -2,147149791 | 1,20E-16 |
| FAM107B   | -2,148838783 | 1,37E-07 |
| TRAM1     | -2,150709171 | 7,27E-12 |
| PLCD3     | -2,150878406 | 3,65E-08 |
| HSD17B12  | -2,151702164 | 5,72E-29 |
| MAP3K12   | -2,157191961 | 2,99E-07 |
| LPCAT2    | -2,158170388 | 1,36E-08 |
| SERPINB1  | -2,160889742 | 8,89E-16 |
| GRB10     | -2,162943655 | 0,000443 |
| NEDD4     | -2,164596902 | 1,16E-25 |
| CARD10    | -2,166040474 | 1,42E-11 |
| AHI1      | -2,170112786 | 4,55E-14 |
| SFMBT2    | -2,171446084 | 1,07E-06 |
| TCF7      | -2,172470338 | 9,16E-14 |
| RASSF10   | -2,173202777 | 3,78E-07 |
| GALT      | -2,17338393  | 0,000415 |
| YPEL2     | -2,176087197 | 0,000839 |
| CPNE2     | -2,17828855  | 1,36E-08 |
| PMEPA1    | -2,183043691 | 6,05E-15 |
| ARHGAP29  | -2,185102293 | 1,18E-08 |
| ADPRH     | -2,189376374 | 0,000384 |
| PLXND1    | -2,190058797 | 1,79E-12 |
| MTMR10    | -2,191381194 | 6,03E-14 |
| ATG16L1   | -2,193676739 | 4,68E-26 |
| CAPN10    | -2,196467466 | 8,79E-11 |
| AP1S3     | -2,19666235  | 4,48E-13 |
| DIXDC1    | -2,199356544 | 3,75E-13 |
| HNRNPU-A  | -2,201208333 | 0,000184 |
| GCLM      | -2,205115798 | 2,53E-09 |
| ZAK       | -2,206127585 | 5,86E-30 |
| DGCR5     | -2,20882555  | 1,87E-05 |
| APLP1     | -2,208976219 | 1,91E-06 |
| BHLHE40   | -2,211849444 | 4,88E-20 |

|           |              |          |
|-----------|--------------|----------|
| ANXA4     | -2,213708536 | 6,30E-15 |
| ABHD14A   | -2,214354882 | 0,000689 |
| GALNT18   | -2,218088068 | 4,53E-16 |
| EPB41L1   | -2,218206688 | 4,74E-21 |
| CDKL1     | -2,218874716 | 5,61E-06 |
| RNF157    | -2,219600418 | 4,10E-12 |
| RBM24     | -2,220060873 | 2,81E-07 |
| CYFIP2    | -2,220432832 | 1,95E-08 |
| HJURP     | -2,221265172 | 2,71E-15 |
| RNF170    | -2,22227403  | 3,34E-12 |
| RNF213    | -2,22318742  | 2,59E-11 |
| LAMC3     | -2,223539944 | 2,79E-06 |
| SDCBP     | -2,224391013 | 8,23E-13 |
| BRSK2     | -2,224919846 | 6,15E-06 |
| CPD       | -2,225885835 | 7,38E-31 |
| ADAM10    | -2,230517562 | 4,10E-24 |
| SLC16A3   | -2,237337887 | 3,82E-06 |
| GSR       | -2,239186552 | 1,76E-23 |
| CTSF      | -2,2399567   | 4,21E-10 |
| TTC28     | -2,240028436 | 4,47E-15 |
| L3MBTL3   | -2,241919633 | 2,34E-09 |
| EID2B     | -2,242188017 | 4,93E-06 |
| SCARA3    | -2,2434334   | 2,27E-15 |
| TMC5      | -2,243690911 | 1,08E-15 |
| PAK1      | -2,24707866  | 2,77E-11 |
| KCNQ5     | -2,250433543 | 0,000169 |
| LZTS3     | -2,250668698 | 0,000185 |
| IKBIP     | -2,254439392 | 3,47E-07 |
| FKBP14    | -2,255146701 | 2,67E-17 |
| TMX3      | -2,257811834 | 2,80E-19 |
| ITGB4     | -2,263565967 | 3,63E-16 |
| UPP1      | -2,267128009 | 0,000581 |
| HIPK2     | -2,274135816 | 3,52E-11 |
| ZNF512    | -2,276912575 | 5,97E-22 |
| ACCS      | -2,27941561  | 0,000525 |
| CFL2      | -2,285645909 | 1,25E-22 |
| PRKCE     | -2,290353975 | 3,00E-05 |
| ANK2      | -2,293866137 | 0,000592 |
| TSPAN5    | -2,296749438 | 4,26E-08 |
| WDR35     | -2,302458147 | 1,51E-15 |
| WDR90     | -2,302759843 | 1,55E-07 |
| THRA      | -2,30578153  | 1,08E-08 |
| SYP       | -2,309548862 | 0,000372 |
| CNTLN     | -2,316537509 | 7,37E-11 |
| C17orf104 | -2,316861933 | 4,87E-05 |
| ETHE1     | -2,319089812 | 6,23E-12 |
| MAFG      | -2,32188122  | 1,91E-31 |
| LPCAT4    | -2,326678032 | 1,20E-10 |
| TMEM17    | -2,328231809 | 1,15E-08 |
| GNB4      | -2,328558669 | 7,60E-19 |

|          |              |          |
|----------|--------------|----------|
| PBX1     | -2,328995574 | 6,47E-08 |
| RAB31    | -2,329077699 | 3,57E-08 |
| ABHD4    | -2,329245018 | 4,40E-06 |
| FAT1     | -2,329637814 | 1,99E-14 |
| ANXA2    | -2,330746247 | 3,08E-45 |
| MET      | -2,335696518 | 2,16E-40 |
| FAM131C  | -2,343511831 | 4,36E-08 |
| TNNI3    | -2,348024979 | 8,65E-05 |
| CCDC82   | -2,352682865 | 5,25E-07 |
| TNFRSF1A | -2,352768424 | 2,06E-20 |
| TBX3     | -2,354831689 | 4,25E-35 |
| SH2D4A   | -2,357669942 | 2,80E-27 |
| C12orf75 | -2,369793329 | 4,21E-23 |
| SEMA3B   | -2,370029045 | 4,09E-08 |
| DSTNP2   | -2,370588663 | 5,26E-06 |
| ANXA2P2  | -2,370844525 | 2,43E-08 |
| CPEB2    | -2,372963177 | 2,68E-09 |
| FMNL1    | -2,373219006 | 4,79E-17 |
| IL4R     | -2,379371751 | 3,64E-08 |
| TGFB1    | -2,381476927 | 8,55E-26 |
| PHKA1    | -2,384547231 | 7,59E-24 |
| CAMKK1   | -2,386361714 | 1,44E-13 |
| DEGS1    | -2,392580498 | 1,44E-16 |
| CLIP2    | -2,397485647 | 9,54E-15 |
| ID3      | -2,401148867 | 5,18E-11 |
| SSFA2    | -2,401293442 | 1,11E-34 |
| ABHD6    | -2,403420475 | 1,29E-08 |
| RPL13P5  | -2,412522741 | 2,30E-05 |
| FBXO2    | -2,413724331 | 1,07E-05 |
| NCOA7    | -2,414302323 | 4,52E-24 |
| FGFBP3   | -2,418348699 | 7,34E-09 |
| RNPEPL1  | -2,4242428   | 4,81E-20 |
| PORCN    | -2,426111215 | 2,48E-09 |
| A4GALT   | -2,42725596  | 9,25E-05 |
| FAM63B   | -2,431994557 | 2,58E-07 |
| TRIP10   | -2,432676987 | 3,49E-13 |
| SLC25A12 | -2,433221121 | 6,50E-21 |
| SLC35G1  | -2,437424286 | 8,88E-08 |
| GALNT2   | -2,440758635 | 6,52E-34 |
| METTL7B  | -2,442039065 | 2,14E-10 |
| CHM      | -2,442187102 | 1,58E-08 |
| KBTBD11  | -2,442307584 | 1,99E-07 |
| RILPL2   | -2,443062189 | 1,61E-05 |
| IQSEC2   | -2,44335333  | 5,67E-11 |
| PHYH     | -2,443965175 | 6,96E-19 |
| LYPD1    | -2,447913557 | 3,30E-12 |
| BRWD3    | -2,450505207 | 4,80E-09 |
| DOCK1    | -2,450836356 | 1,58E-24 |
| COTL1    | -2,451400877 | 3,32E-24 |
| SLC23A2  | -2,451801958 | 1,18E-23 |

|           |              |          |
|-----------|--------------|----------|
| PKD2      | -2,461933241 | 2,85E-19 |
| NBEA      | -2,463944774 | 5,59E-14 |
| UNC13A    | -2,47098578  | 0,000576 |
| ADORA2B   | -2,47184561  | 1,12E-08 |
| VASH1     | -2,473022375 | 4,91E-08 |
| ABCC4     | -2,473667738 | 8,25E-31 |
| REEP2     | -2,476229517 | 1,15E-10 |
| CTSL      | -2,480767482 | 2,39E-13 |
| KIAA1804  | -2,481810113 | 9,05E-10 |
| C1orf106  | -2,484204344 | 4,74E-10 |
| OAF       | -2,487696924 | 6,65E-13 |
| GLS       | -2,491836843 | 2,05E-23 |
| PRDM11    | -2,492296532 | 3,07E-07 |
| MFI2      | -2,494290325 | 1,10E-24 |
| DCBLD1    | -2,499822743 | 1,43E-14 |
| CYP4V2    | -2,50095507  | 0,000381 |
| FKBP7     | -2,501362491 | 3,41E-11 |
| ITGAV     | -2,502950377 | 2,44E-26 |
| CASC15    | -2,503498422 | 5,86E-05 |
| TNFAIP3   | -2,50490909  | 9,73E-05 |
| SGTB      | -2,505020514 | 8,31E-16 |
| TSPAN14   | -2,508375892 | 9,01E-32 |
| ECE1      | -2,51058738  | 5,62E-31 |
| HEYL      | -2,512970087 | 1,52E-09 |
| FAM81A    | -2,513181715 | 4,83E-13 |
| NRIP1     | -2,516169105 | 3,79E-15 |
| STOM      | -2,516272947 | 1,96E-35 |
| ZNF81     | -2,520836778 | 3,14E-07 |
| SRXN1     | -2,524740719 | 5,05E-12 |
| ITGB1     | -2,52529863  | 1,48E-47 |
| GOLM1     | -2,528165851 | 1,29E-38 |
| C19orf33  | -2,529411553 | 3,34E-16 |
| FSTL3     | -2,535562893 | 6,19E-11 |
| GPAT3     | -2,544829379 | 1,24E-07 |
| NCR3LG1   | -2,546639805 | 9,73E-07 |
| RDH10     | -2,547014626 | 3,16E-15 |
| B4GALT5   | -2,548305827 | 3,88E-31 |
| ACBD4     | -2,553015357 | 2,00E-08 |
| ARL4D     | -2,555567409 | 4,98E-11 |
| TK2       | -2,562810851 | 2,43E-13 |
| ZBED5-AS1 | -2,568913917 | 3,38E-10 |
| FTL       | -2,570932756 | 5,20E-13 |
| SLC12A2   | -2,577618794 | 1,80E-28 |
| LINC01604 | -2,578573145 | 4,37E-05 |
| ADORA1    | -2,579232637 | 6,85E-08 |
| PON2      | -2,589241837 | 1,97E-16 |
| SBF2      | -2,591566926 | 8,73E-10 |
| KCNH3     | -2,592906162 | 3,25E-10 |
| PGM1      | -2,593781375 | 1,53E-18 |
| MAP1A     | -2,602027834 | 3,04E-05 |

|           |              |          |
|-----------|--------------|----------|
| WBSCR27   | -2,602448164 | 2,90E-05 |
| AFAP1L2   | -2,608043905 | 6,55E-09 |
| CHD9      | -2,614383951 | 1,09E-28 |
| C20orf196 | -2,615924318 | 8,29E-06 |
| GNG4      | -2,618250743 | 5,95E-07 |
| TSPAN4    | -2,622063114 | 1,66E-14 |
| LYST      | -2,623454305 | 3,83E-07 |
| TCP11L1   | -2,623835622 | 9,14E-21 |
| SIPA1     | -2,624125983 | 6,36E-16 |
| SCCPDH    | -2,624946868 | 4,05E-26 |
| CDK6      | -2,627933655 | 1,03E-06 |
| SOCS6     | -2,632500991 | 5,28E-28 |
| CYP2S1    | -2,636283768 | 6,28E-10 |
| CCDC88B   | -2,639999743 | 5,07E-07 |
| COL4A4    | -2,641337732 | 0,000431 |
| EHF       | -2,642630779 | 1,32E-09 |
| PRPS2     | -2,650344179 | 1,05E-29 |
| EDA2R     | -2,65884519  | 3,74E-10 |
| TBC1D8    | -2,659475858 | 2,04E-08 |
| AREG      | -2,666492998 | 1,77E-11 |
| ST6GAL1   | -2,668587739 | 1,55E-06 |
| GBX2      | -2,677636394 | 0,000866 |
| SLC6A6    | -2,680006763 | 1,07E-36 |
| SLC1A1    | -2,686447728 | 0,001015 |
| STRIP2    | -2,686681925 | 5,56E-10 |
| TMCC1-AS1 | -2,693017289 | 4,91E-07 |
| PALLD     | -2,693143702 | 2,30E-18 |
| PYGO1     | -2,697363372 | 6,78E-10 |
| VPS13C    | -2,699114961 | 1,41E-23 |
| PCDHAC2   | -2,70096235  | 8,94E-06 |
| DNMBP     | -2,705117072 | 2,80E-19 |
| GYG2      | -2,708674209 | 3,31E-08 |
| TNFSF9    | -2,712487356 | 8,55E-05 |
| TGFBR3    | -2,713365903 | 0,00024  |
| HOOK3     | -2,717833399 | 3,08E-23 |
| ARHGAP24  | -2,719720658 | 1,72E-05 |
| RPH3AL    | -2,725609943 | 7,68E-13 |
| LOC145783 | -2,728230377 | 1,39E-06 |
| BTN3A1    | -2,73654328  | 0,000312 |
| MATN3     | -2,745508677 | 7,35E-05 |
| MXRA7     | -2,748743962 | 7,12E-16 |
| SFXN3     | -2,749555339 | 8,18E-20 |
| LOC339803 | -2,758122273 | 2,87E-08 |
| LOC100130 | -2,762264628 | 0,000419 |
| CMIP      | -2,763623575 | 1,59E-37 |
| KLHL5     | -2,764722222 | 5,01E-40 |
| PCOLCE2   | -2,765982512 | 4,56E-14 |
| GRAMD1A   | -2,767591578 | 8,94E-28 |
| EGLN3     | -2,770009441 | 1,22E-16 |
| PRKD1     | -2,774445342 | 3,55E-08 |

|           |              |          |
|-----------|--------------|----------|
| ACO1      | -2,775316418 | 3,14E-16 |
| MTUS1     | -2,776045692 | 4,59E-32 |
| MAP3K8    | -2,783396326 | 2,63E-06 |
| FADS1     | -2,78404692  | 1,60E-23 |
| C15orf41  | -2,788392695 | 2,52E-13 |
| LIF       | -2,789389814 | 1,79E-06 |
| SPRY2     | -2,79247235  | 4,07E-11 |
| SUSD1     | -2,795344804 | 4,29E-18 |
| SRC       | -2,795457169 | 3,67E-41 |
| EHBP1     | -2,797995239 | 1,42E-38 |
| GALNT10   | -2,80386621  | 2,10E-37 |
| RASD2     | -2,812307287 | 2,17E-05 |
| LRP1      | -2,813071842 | 2,30E-07 |
| GGT1      | -2,818555128 | 4,56E-40 |
| KLF13     | -2,82416595  | 6,02E-24 |
| KCNF1     | -2,828578169 | 1,31E-09 |
| PELI1     | -2,831500485 | 3,58E-09 |
| EML2-AS1  | -2,831943038 | 5,94E-05 |
| GRK5      | -2,836476196 | 1,68E-09 |
| LRRN2     | -2,836897248 | 3,46E-06 |
| MUC5B     | -2,845783695 | 1,58E-21 |
| SLCO3A1   | -2,845800882 | 1,30E-23 |
| ADAM9     | -2,84849873  | 3,76E-46 |
| FXD5      | -2,852235302 | 5,89E-29 |
| NT5M      | -2,855845538 | 1,64E-10 |
| TAGLN     | -2,856720979 | 8,02E-05 |
| KIF13B    | -2,862613519 | 1,43E-09 |
| DNAJB4    | -2,867950928 | 5,04E-07 |
| NGEF      | -2,86959755  | 2,04E-13 |
| BTN3A2    | -2,872318111 | 0,00015  |
| ARHGEF10  | -2,882176343 | 4,27E-16 |
| NR2F1-AS1 | -2,888191542 | 5,90E-12 |
| NFAT5     | -2,890842297 | 7,23E-22 |
| FAM135A   | -2,894210537 | 1,07E-14 |
| FERMT1    | -2,895333932 | 8,51E-40 |
| DENND3    | -2,895366497 | 2,77E-07 |
| ITGA2     | -2,896672787 | 9,62E-33 |
| RPGR      | -2,89944104  | 4,12E-06 |
| ZBTB38    | -2,900392667 | 1,50E-39 |
| KLRG1     | -2,903808171 | 0,000579 |
| WNT3      | -2,912156878 | 1,32E-07 |
| PTHLH     | -2,915049614 | 4,17E-11 |
| GPRC5B    | -2,917244233 | 7,96E-09 |
| ABHD8     | -2,91831183  | 0,000835 |
| DUSP28    | -2,919247026 | 7,28E-05 |
| CLCF1     | -2,923273467 | 5,50E-05 |
| DPY19L2P2 | -2,926718855 | 0,0001   |
| MICAL2    | -2,936122556 | 2,83E-29 |
| PPARG     | -2,936516551 | 5,79E-13 |
| CCND2     | -2,936604527 | 0,00012  |



|           |              |          |
|-----------|--------------|----------|
| GHDC      | -2,936938621 | 3,79E-21 |
| SASH1     | -2,939835656 | 6,20E-11 |
| ADGRL2    | -2,94566724  | 6,35E-29 |
| ACSL4     | -2,953063426 | 4,19E-30 |
| FAM72C    | -2,9575849   | 0,000173 |
| ABCC1     | -2,960483529 | 4,79E-50 |
| SPOCK1    | -2,961568875 | 1,47E-08 |
| ST3GAL5   | -2,963255542 | 4,39E-09 |
| FCGBP     | -2,963661754 | 4,58E-05 |
| SGK223    | -2,968142847 | 8,51E-38 |
| HNF4G     | -2,977176327 | 0,000126 |
| EVC2      | -2,977947249 | 4,23E-07 |
| LOC171391 | -2,978364799 | 1,14E-06 |
| LINC00294 | -2,981170442 | 2,03E-12 |
| PTRF      | -2,982103663 | 2,19E-27 |
| MCOLN2    | -2,985565775 | 1,02E-05 |
| GPCPD1    | -2,986894671 | 1,36E-17 |
| BCAR3     | -2,987447756 | 2,52E-26 |
| ACSM3     | -2,987758949 | 8,32E-10 |
| FKBP1B    | -2,993067509 | 5,45E-06 |
| NDRG1     | -2,994640994 | 2,48E-27 |
| KSR1      | -2,998470224 | 1,22E-14 |
| AKAP7     | -2,998493019 | 4,91E-06 |
| TIMP1     | -3,00086058  | 1,82E-08 |
| VANGL2    | -3,00111973  | 1,53E-11 |
| HYAL3     | -3,003692008 | 1,62E-07 |
| CMTM3     | -3,021723393 | 6,83E-16 |
| PRR5L     | -3,042960663 | 4,92E-12 |
| MGC70870  | -3,048040715 | 0,000457 |
| RBM20     | -3,05118445  | 7,39E-08 |
| ARNTL2    | -3,056134005 | 1,08E-21 |
| CNFN      | -3,067873422 | 4,79E-15 |
| IL1R1     | -3,071833119 | 1,99E-06 |
| LOC730102 | -3,075369222 | 2,11E-05 |
| ADGRG6    | -3,083031395 | 1,01E-42 |
| CAMK2D    | -3,086291182 | 1,52E-28 |
| CHIC1     | -3,090741575 | 3,07E-14 |
| RTTN      | -3,097374691 | 7,03E-19 |
| IFFO2     | -3,099344807 | 2,53E-32 |
| TYW1B     | -3,100021856 | 1,16E-05 |
| ANO7      | -3,103316482 | 0,00011  |
| SMAD3     | -3,103524902 | 4,77E-23 |
| DNAJC22   | -3,104857002 | 5,73E-29 |
| TIMP2     | -3,105660572 | 1,38E-27 |
| EPHX1     | -3,108874475 | 1,75E-20 |
| TUBB4A    | -3,115558501 | 1,38E-17 |
| PSMB9     | -3,118218365 | 3,52E-06 |
| SYNPO     | -3,127136428 | 2,57E-10 |
| CLCN4     | -3,131584094 | 7,01E-11 |
| DDX60L    | -3,138365466 | 9,81E-14 |

|           |              |          |
|-----------|--------------|----------|
| HOXC4     | -3,14390568  | 1,37E-12 |
| NUDT11    | -3,144938984 | 3,70E-06 |
| FGFR1     | -3,146487106 | 3,19E-57 |
| PPAP2B    | -3,147972901 | 8,00E-20 |
| FAM89A    | -3,150831354 | 4,39E-10 |
| TOX3      | -3,155207677 | 1,20E-05 |
| SORCS2    | -3,167256483 | 4,81E-08 |
| CEMIP     | -3,168171274 | 8,37E-14 |
| FRMD5     | -3,170876697 | 7,34E-19 |
| PIK3CD    | -3,176220735 | 3,42E-08 |
| ADGRF4    | -3,179704278 | 5,68E-06 |
| NUAK2     | -3,184017351 | 1,43E-20 |
| ST6GALNA4 | -3,190241737 | 8,02E-13 |
| STARD9    | -3,192852355 | 2,47E-06 |
| LOC100507 | -3,195833914 | 0,000814 |
| GPR39     | -3,197723457 | 1,21E-12 |
| HOTAIRM1  | -3,198869775 | 8,57E-05 |
| LIPH      | -3,201491527 | 1,44E-07 |
| ZNF532    | -3,201800209 | 5,24E-38 |
| HTR1D     | -3,203411644 | 7,45E-08 |
| SPTB      | -3,215199911 | 0,000323 |
| FSTL4     | -3,218360636 | 2,06E-13 |
| DSE       | -3,21939713  | 2,17E-22 |
| GOLGA8B   | -3,224779116 | 1,26E-06 |
| LRP4      | -3,228397998 | 1,18E-17 |
| MFGE8     | -3,234698026 | 1,16E-41 |
| JAZF1     | -3,235465562 | 0,00037  |
| ANXA3     | -3,235811475 | 4,82E-19 |
| RAB3B     | -3,238104179 | 2,99E-12 |
| MST1R     | -3,243684649 | 4,62E-09 |
| RHPN2     | -3,258470219 | 2,15E-58 |
| CHST3     | -3,262431462 | 1,41E-07 |
| DOCK5     | -3,262455098 | 1,39E-36 |
| LGR4      | -3,270254572 | 1,60E-27 |
| CENPV     | -3,270872524 | 6,82E-14 |
| PRNP      | -3,27115845  | 2,31E-32 |
| ELFN2     | -3,271594132 | 1,69E-08 |
| TMEM56    | -3,272842757 | 1,85E-27 |
| OSMR      | -3,283578511 | 2,49E-21 |
| LRRK2     | -3,288910384 | 1,20E-13 |
| LOC344887 | -3,295200043 | 0,000752 |
| GRIN2D    | -3,307059495 | 5,41E-18 |
| SOWAHC    | -3,317412694 | 9,29E-23 |
| COL27A1   | -3,318805675 | 8,22E-12 |
| NXPE3     | -3,319379757 | 2,13E-11 |
| KIAA1549L | -3,320921652 | 4,53E-16 |
| PLK2      | -3,321623028 | 5,33E-23 |
| LOC389831 | -3,334586725 | 3,80E-23 |
| HLF       | -3,339545602 | 3,34E-09 |
| FAHD2B    | -3,344733193 | 7,50E-18 |

|           |              |          |
|-----------|--------------|----------|
| F2R       | -3,348285188 | 1,14E-50 |
| FBLN5     | -3,350313299 | 6,87E-06 |
| C6orf141  | -3,353825171 | 2,21E-11 |
| SLC47A1   | -3,356943096 | 1,06E-25 |
| QPCT      | -3,360041355 | 1,01E-15 |
| SDK2      | -3,364449426 | 5,29E-12 |
| RASSF4    | -3,372000432 | 1,50E-05 |
| CYP4F3    | -3,378138531 | 0,000199 |
| C16orf45  | -3,38522245  | 2,25E-24 |
| PDLIM5    | -3,390797565 | 1,96E-36 |
| SQRDL     | -3,391941641 | 2,49E-16 |
| CREG2     | -3,393906131 | 0,000673 |
| PDGFRL    | -3,397555266 | 6,69E-19 |
| WWTR1     | -3,398927209 | 6,91E-60 |
| B3GNT9    | -3,398955687 | 3,50E-06 |
| THSD4     | -3,411411336 | 2,66E-28 |
| ADAMTS9   | -3,413570203 | 1,76E-08 |
| SH3BGR1   | -3,418160978 | 5,10E-36 |
| SLFN11    | -3,418476219 | 4,01E-22 |
| CUEDC1    | -3,419939482 | 5,31E-64 |
| DNAJC12   | -3,425723788 | 7,94E-06 |
| PIK3AP1   | -3,427591229 | 3,21E-05 |
| BCL2L15   | -3,432367471 | 2,62E-09 |
| HOXA7     | -3,440471398 | 3,38E-05 |
| DCLK2     | -3,443721406 | 1,26E-13 |
| KIAA1462  | -3,448335265 | 5,96E-11 |
| LINC01468 | -3,46121666  | 4,46E-08 |
| CHST6     | -3,466257524 | 0,000417 |
| VLDLR     | -3,47426875  | 1,19E-10 |
| SH3RF2    | -3,479715165 | 8,69E-12 |
| SRPX      | -3,484949726 | 2,07E-09 |
| HDX       | -3,485707592 | 0,000112 |
| MBP       | -3,486238849 | 4,93E-23 |
| FAM171A1  | -3,488466347 | 1,89E-39 |
| C3orf52   | -3,506477859 | 4,49E-05 |
| LRRC8C    | -3,50694548  | 1,09E-19 |
| COL21A1   | -3,510307519 | 6,02E-06 |
| ZNF264    | -3,514312325 | 6,39E-20 |
| EPB41L4A  | -3,52082005  | 2,37E-15 |
| ANXA2P3   | -3,525398929 | 1,98E-13 |
| COL4A5    | -3,536340057 | 4,18E-19 |
| CCDC68    | -3,538038726 | 1,41E-06 |
| RBMS2     | -3,542062665 | 4,02E-33 |
| UGDH      | -3,543224252 | 1,10E-48 |
| DLGAP1-AS | -3,5438839   | 4,91E-06 |
| EPDR1     | -3,545062073 | 4,68E-32 |
| PLA2R1    | -3,547234235 | 0,000223 |
| PCED1B    | -3,551324742 | 9,85E-14 |
| RUSC2     | -3,557992981 | 1,60E-25 |
| MAP3K15   | -3,581457828 | 1,02E-09 |

|            |              |          |
|------------|--------------|----------|
| FAM13A     | -3,589370201 | 1,92E-14 |
| AMDHD1     | -3,591031744 | 3,62E-12 |
| FAM101B    | -3,591758253 | 4,86E-27 |
| LINC00152  | -3,593148692 | 3,46E-15 |
| RTN4RL2    | -3,596051011 | 1,33E-10 |
| RIN3       | -3,620281211 | 5,46E-25 |
| APOL1      | -3,621025751 | 0,000373 |
| HOGA1      | -3,627701066 | 1,08E-09 |
| HSD17B11   | -3,627817464 | 3,64E-18 |
| CDH23      | -3,629662491 | 0,000509 |
| BMP4       | -3,633621934 | 5,28E-28 |
| TUB        | -3,646368295 | 1,91E-39 |
| VIM-AS1    | -3,652738335 | 1,30E-18 |
| RRAS       | -3,653091492 | 2,43E-23 |
| NPAS2      | -3,657212049 | 3,38E-35 |
| PAQR5      | -3,662314478 | 1,15E-53 |
| MYLK       | -3,66649102  | 4,09E-34 |
| SP100      | -3,669218466 | 1,26E-05 |
| SLC16A4    | -3,672604922 | 7,13E-26 |
| NLRC5      | -3,67688517  | 1,15E-07 |
| TRPC1      | -3,678943087 | 1,04E-15 |
| LAMC2      | -3,68230282  | 2,14E-12 |
| CA12       | -3,68415122  | 1,14E-12 |
| GAS6-AS1   | -3,69337918  | 0,00074  |
| ZNF488     | -3,699518632 | 8,22E-10 |
| ANKRD29    | -3,705164027 | 2,21E-07 |
| S100A6     | -3,706154175 | 1,83E-29 |
| CPS1       | -3,710860752 | 4,01E-53 |
| ARPIN      | -3,713563801 | 7,84E-33 |
| GPC1       | -3,723699383 | 5,13E-68 |
| COL5A1     | -3,727043237 | 6,62E-13 |
| COCH       | -3,730706666 | 7,44E-22 |
| MGLL       | -3,744497147 | 3,04E-18 |
| KCNMA1     | -3,747044346 | 2,12E-16 |
| OLFML2A    | -3,749268925 | 2,39E-13 |
| HSPA12A    | -3,751659801 | 2,21E-41 |
| CAMK2N1    | -3,75347989  | 5,97E-26 |
| RASSF2     | -3,756192772 | 6,70E-26 |
| CD68       | -3,758379673 | 5,93E-11 |
| PIK3CD-AS1 | -3,767851468 | 3,92E-07 |
| ANKDD1A    | -3,794516031 | 0,000298 |
| TRABD2A    | -3,797700408 | 0,000831 |
| NRCAM      | -3,801667352 | 1,42E-29 |
| PAPSS2     | -3,802226664 | 3,03E-07 |
| MMD        | -3,805744489 | 5,26E-24 |
| CST1       | -3,807616703 | 5,87E-41 |
| ARHGEF40   | -3,818415067 | 2,52E-11 |
| RAB11FIP5  | -3,823868728 | 1,15E-19 |
| BOC        | -3,825839321 | 9,08E-30 |
| TRIM7      | -3,830257893 | 9,77E-21 |

|           |              |           |
|-----------|--------------|-----------|
| SERPINF2  | -3,834947548 | 0,000841  |
| CHST7     | -3,838054056 | 6,15E-23  |
| PRAME     | -3,846932695 | 2,86E-18  |
| FBN2      | -3,85033524  | 1,38E-21  |
| FHL1      | -3,862091744 | 5,92E-21  |
| C3orf80   | -3,868773518 | 2,13E-06  |
| THBD      | -3,870063059 | 5,94E-39  |
| RASGRF2   | -3,875268123 | 4,37E-06  |
| TMSB4X    | -3,881138002 | 7,34E-113 |
| CEACAM19  | -3,886266663 | 1,50E-11  |
| MORC4     | -3,889363335 | 1,65E-56  |
| ELMO1     | -3,899727089 | 4,39E-10  |
| HDAC4     | -3,902959639 | 4,83E-12  |
| PLCXD2    | -3,90401293  | 1,23E-10  |
| CCDC88A   | -3,907782332 | 9,49E-82  |
| HTATSF1P2 | -3,912463254 | 1,15E-19  |
| HEG1      | -3,914581049 | 3,50E-05  |
| DGKD      | -3,917738033 | 2,18E-75  |
| CDC42EP3  | -3,925187295 | 7,14E-50  |
| RARB      | -3,926752143 | 8,54E-14  |
| STEAP1    | -3,932909477 | 1,38E-14  |
| PLAUR     | -3,93406433  | 5,13E-13  |
| SNX7      | -3,943639731 | 8,44E-29  |
| CNTNAP1   | -3,948293014 | 8,06E-29  |
| LOC103908 | -3,950246246 | 1,08E-08  |
| MTCL1     | -3,958062794 | 1,54E-37  |
| SIRPA     | -3,963746957 | 1,06E-61  |
| ITGA5     | -3,966979792 | 3,04E-35  |
| BTBD11    | -3,967748071 | 1,78E-46  |
| BDKRB2    | -3,970790664 | 5,94E-06  |
| DUSP6     | -3,971664901 | 7,12E-05  |
| KIF7      | -3,97757222  | 5,65E-06  |
| SLC30A4   | -3,979378683 | 3,33E-07  |
| CMTM7     | -3,98151949  | 1,02E-30  |
| SLC12A4   | -3,992752726 | 9,04E-12  |
| MAPRE2    | -4,001351375 | 3,94E-40  |
| SEPT10    | -4,006120047 | 8,34E-22  |
| ITGA3     | -4,006998377 | 1,73E-113 |
| EHD2      | -4,018918613 | 3,63E-84  |
| ADAM19    | -4,022231498 | 1,91E-30  |
| GLRX      | -4,02416803  | 7,41E-07  |
| CEP112    | -4,039273419 | 2,12E-27  |
| CRIM1     | -4,043659153 | 3,91E-45  |
| C16orf62  | -4,049034373 | 4,31E-68  |
| DENND5B   | -4,0635956   | 4,50E-50  |
| SGK1      | -4,07378676  | 2,14E-46  |
| CD44      | -4,083736839 | 8,90E-50  |
| C3orf18   | -4,091858401 | 2,78E-09  |
| TRPM6     | -4,092396644 | 1,24E-13  |
| RHCG      | -4,095978812 | 6,17E-06  |

|           |              |          |
|-----------|--------------|----------|
| MN1       | -4,09650253  | 0,000147 |
| GNAL      | -4,096878116 | 2,40E-27 |
| CNTNAP3   | -4,099149313 | 1,32E-29 |
| NPHS1     | -4,100210583 | 1,31E-05 |
| IGFBP3    | -4,10389365  | 1,58E-13 |
| ITGA6     | -4,109396992 | 3,43E-61 |
| CPM       | -4,117761397 | 2,42E-14 |
| MITF      | -4,118916245 | 3,17E-09 |
| ENO3      | -4,121988012 | 6,11E-10 |
| ELK3      | -4,123011365 | 1,95E-32 |
| COL12A1   | -4,126485057 | 5,75E-12 |
| NTN4      | -4,131241592 | 7,83E-33 |
| CCDC184   | -4,131979799 | 1,88E-05 |
| EEPD1     | -4,133720514 | 2,32E-14 |
| CDKL5     | -4,135849714 | 1,52E-16 |
| ANGPT1    | -4,138301293 | 7,33E-09 |
| LCAT      | -4,138379148 | 0,000933 |
| ENPP1     | -4,139596745 | 8,85E-16 |
| FCGRT     | -4,145869481 | 9,20E-18 |
| CYP4F11   | -4,147368977 | 2,64E-27 |
| EMILIN2   | -4,147573431 | 4,83E-13 |
| EVA1A     | -4,149908226 | 1,86E-10 |
| DLG4      | -4,177388429 | 9,49E-22 |
| NCALD     | -4,178342658 | 4,34E-09 |
| ANO1      | -4,181963891 | 0,000254 |
| FADS2     | -4,184195261 | 2,25E-85 |
| F2RL1     | -4,188862756 | 1,93E-54 |
| DDX11L2   | -4,196771334 | 5,38E-08 |
| STAMBPL1  | -4,197036757 | 6,70E-16 |
| CAV2      | -4,199738379 | 1,31E-57 |
| ARHGAP23  | -4,214507694 | 7,35E-18 |
| LPAR6     | -4,217720476 | 0,000159 |
| C1QL4     | -4,217735797 | 0,000695 |
| PFKFB3    | -4,219438981 | 4,82E-35 |
| AMIGO2    | -4,220893607 | 5,90E-66 |
| BMPR1B    | -4,227171132 | 1,02E-35 |
| TMEM92    | -4,229577387 | 7,83E-06 |
| FSIP1     | -4,247423724 | 2,40E-05 |
| RPS6KA6   | -4,249901731 | 4,12E-20 |
| CNNM1     | -4,262017052 | 1,21E-42 |
| RASSF9    | -4,263893086 | 0,000787 |
| FHOD3     | -4,280046126 | 9,78E-12 |
| ARL4C     | -4,285823687 | 1,90E-86 |
| VWA5B2    | -4,295107998 | 1,86E-06 |
| APOL6     | -4,296268596 | 1,02E-17 |
| ARHGAP26  | -4,308991468 | 1,03E-20 |
| SOX9      | -4,310106382 | 1,97E-20 |
| ANKRD2    | -4,332213485 | 0,000215 |
| FGG       | -4,332348832 | 4,58E-06 |
| C14orf159 | -4,333034194 | 6,12E-31 |

|           |              |           |
|-----------|--------------|-----------|
| CGNL1     | -4,350600208 | 8,13E-11  |
| LINC01503 | -4,353108513 | 4,23E-05  |
| CSF1      | -4,376294191 | 1,44E-28  |
| ARAP3     | -4,376358071 | 5,08E-25  |
| TMEM145   | -4,377995423 | 0,000415  |
| PDE4D     | -4,384830128 | 2,59E-103 |
| ADM       | -4,386293708 | 1,11E-12  |
| GULP1     | -4,387066542 | 4,60E-44  |
| CACNG8    | -4,38836635  | 0,000294  |
| FAM124A   | -4,393565082 | 1,05E-09  |
| MGAT5B    | -4,396404788 | 3,39E-36  |
| WIPF1     | -4,399046052 | 1,32E-45  |
| ADAMTSL4  | -4,404205641 | 1,96E-05  |
| VEGFC     | -4,407339362 | 5,01E-15  |
| RIN2      | -4,41098654  | 8,27E-31  |
| ADAM23    | -4,41346179  | 1,61E-15  |
| MPP1      | -4,425101959 | 2,07E-12  |
| PCDHB5    | -4,436098047 | 2,29E-09  |
| MSRB3     | -4,453560616 | 2,09E-39  |
| TGFBR2    | -4,455673006 | 1,05E-56  |
| XDH       | -4,462934582 | 0,000418  |
| GATA4     | -4,463217266 | 2,15E-10  |
| PALD1     | -4,464240016 | 6,97E-41  |
| DGKA      | -4,464879871 | 1,29E-17  |
| ZNF469    | -4,47630182  | 2,16E-14  |
| MAP1B     | -4,478204013 | 7,23E-34  |
| ATP8B3    | -4,483401558 | 3,81E-07  |
| FHL2      | -4,491469625 | 7,89E-14  |
| DHRS3     | -4,497358442 | 5,79E-40  |
| PELI2     | -4,503902017 | 1,14E-05  |
| NOSTRIN   | -4,504813741 | 2,88E-07  |
| LUCAT1    | -4,541716743 | 1,24E-11  |
| SH3PXD2A  | -4,543728271 | 8,14E-33  |
| LGR6      | -4,5457003   | 2,80E-20  |
| GLIPR1    | -4,551357426 | 3,42E-15  |
| IL22RA1   | -4,584290192 | 3,67E-06  |
| EPHA2     | -4,584341597 | 3,01E-37  |
| FAM189A1  | -4,588598371 | 1,55E-06  |
| TRIM47    | -4,59280337  | 1,61E-55  |
| PCDH9     | -4,595923305 | 1,45E-28  |
| ASB9      | -4,610869248 | 2,49E-08  |
| LOC101927 | -4,613923064 | 5,11E-09  |
| TESC      | -4,614770977 | 6,10E-47  |
| SYNGR4    | -4,620900562 | 0,000245  |
| C1R       | -4,626927951 | 2,91E-28  |
| AKAP12    | -4,628432764 | 1,22E-53  |
| HHEX      | -4,646912652 | 3,95E-38  |
| CEACAM6   | -4,656351127 | 1,31E-11  |
| PDE1A     | -4,659451514 | 1,33E-06  |
| PLCXD1    | -4,662522566 | 3,19E-62  |

|           |              |           |
|-----------|--------------|-----------|
| SERPINB9  | -4,666016272 | 1,82E-35  |
| HOXB6     | -4,67624745  | 1,21E-09  |
| MOB3B     | -4,68930039  | 0,000123  |
| DENND1C   | -4,69105658  | 4,52E-07  |
| TMEM98    | -4,696192052 | 2,64E-27  |
| WIPF3     | -4,697817713 | 0,000326  |
| ANKRD22   | -4,700040355 | 0,000248  |
| ST3GAL2   | -4,702077903 | 3,72E-43  |
| PDE6G     | -4,705560347 | 0,000951  |
| ROR1      | -4,711343815 | 2,34E-57  |
| LOC254896 | -4,737500671 | 0,00089   |
| FBN1      | -4,739152737 | 4,54E-33  |
| CALD1     | -4,752491393 | 7,48E-22  |
| APBB1     | -4,759174686 | 2,09E-35  |
| YOD1      | -4,768046192 | 1,65E-18  |
| ZNF513    | -4,771614955 | 1,34E-18  |
| HOXC8     | -4,77486251  | 3,10E-12  |
| AADAC     | -4,791521802 | 0,000218  |
| FZD8      | -4,821675006 | 5,07E-17  |
| TUBA4A    | -4,825836587 | 3,28E-18  |
| FLJ32255  | -4,826651682 | 0,000306  |
| LINC00511 | -4,83872671  | 0,000492  |
| PRG4      | -4,843572731 | 0,000588  |
| FOSL1     | -4,855994872 | 1,80E-30  |
| MYO1E     | -4,862036159 | 2,18E-45  |
| IGFBP4    | -4,863326066 | 1,83E-48  |
| ZC3H12C   | -4,864732427 | 1,14E-21  |
| SPRED1    | -4,873618489 | 5,55E-36  |
| TNS3      | -4,876159595 | 2,49E-66  |
| FILIP1    | -4,889155254 | 2,23E-12  |
| SLITRK5   | -4,900275999 | 6,69E-06  |
| LGR5      | -4,90466065  | 1,98E-05  |
| TRNP1     | -4,907683685 | 4,84E-84  |
| C17orf51  | -4,912608374 | 8,28E-30  |
| EPHA7     | -4,926332645 | 0,0003    |
| CIB2      | -4,927251887 | 9,46E-28  |
| MRC2      | -4,942131918 | 5,35E-30  |
| EPB41L2   | -4,949476264 | 1,82E-59  |
| CLDND2    | -4,949997644 | 2,70E-07  |
| BAAT      | -4,952574781 | 1,68E-24  |
| GNG2      | -4,961084389 | 1,66E-06  |
| C2orf72   | -4,984297536 | 3,12E-06  |
| GLDC      | -4,999314527 | 3,29E-64  |
| DNM1      | -5,009728913 | 1,62E-117 |
| AHNAK2    | -5,01083406  | 2,39E-129 |
| NEXN      | -5,041253731 | 0,000669  |
| LRRK1     | -5,062718867 | 9,45E-52  |
| RAB32     | -5,071528699 | 5,22E-34  |
| SEC16B    | -5,079683588 | 0,000483  |
| TBX1      | -5,086569724 | 9,04E-06  |



|           |              |           |
|-----------|--------------|-----------|
| TOR4A     | -5,087949323 | 3,41E-71  |
| TRIM6     | -5,088648446 | 4,42E-12  |
| PDE8B     | -5,089873839 | 5,02E-11  |
| RGS2      | -5,099573838 | 3,27E-37  |
| GNAI1     | -5,101215221 | 4,63E-57  |
| LINC01504 | -5,10189969  | 0,000776  |
| SLITRK6   | -5,109039301 | 2,00E-05  |
| SYT11     | -5,114554225 | 4,66E-05  |
| HOXA-AS2  | -5,121041471 | 6,07E-11  |
| PROCR     | -5,127755256 | 4,57E-06  |
| SVEP1     | -5,128252191 | 3,71E-08  |
| CYP26B1   | -5,12909868  | 2,56E-16  |
| INPP1     | -5,133960236 | 1,55E-10  |
| FOXA2     | -5,139070616 | 4,27E-79  |
| CAV1      | -5,146903605 | 1,31E-75  |
| SYCE1L    | -5,189138835 | 7,63E-07  |
| BNC2      | -5,193839872 | 2,16E-05  |
| UBASH3B   | -5,196451679 | 7,58E-47  |
| IL18      | -5,201041254 | 7,18E-14  |
| HAS2      | -5,20391033  | 8,76E-06  |
| CP        | -5,209495278 | 5,67E-12  |
| GRIP2     | -5,237581865 | 4,61E-05  |
| DOCK10    | -5,238613614 | 2,19E-46  |
| SYNE1     | -5,2487767   | 4,61E-37  |
| MESP1     | -5,259297194 | 7,23E-06  |
| ASPH      | -5,26342544  | 6,67E-89  |
| DPP4      | -5,265530185 | 1,97E-07  |
| F5        | -5,26639012  | 4,82E-06  |
| IGFBPL1   | -5,272814994 | 7,45E-17  |
| SMARCA1   | -5,275462519 | 5,13E-47  |
| C15orf52  | -5,277560419 | 5,54E-06  |
| SLC45A1   | -5,282132771 | 3,94E-05  |
| CRAT      | -5,28348558  | 1,37E-38  |
| HOXB13    | -5,302716304 | 6,29E-17  |
| ARHGAP22  | -5,303264377 | 3,48E-10  |
| CRYBG3    | -5,30697382  | 3,04E-35  |
| GJA1      | -5,315714619 | 2,06E-20  |
| PDE7B     | -5,349900901 | 1,40E-17  |
| LOXL2     | -5,362994625 | 2,61E-22  |
| ITGAM     | -5,367517753 | 4,70E-05  |
| PYGL      | -5,374703568 | 3,74E-05  |
| PMP22     | -5,376227714 | 4,62E-42  |
| TGFB2     | -5,380370313 | 6,47E-23  |
| MYH15     | -5,401947588 | 7,15E-11  |
| RIN1      | -5,40662495  | 4,22E-43  |
| LIX1L     | -5,410749716 | 1,66E-67  |
| COL5A2    | -5,414736045 | 2,00E-110 |
| SEMA3A    | -5,416118552 | 4,81E-20  |
| SLC2A3    | -5,426355734 | 2,36E-17  |
| LYN       | -5,426862912 | 3,39E-42  |

|           |              |           |
|-----------|--------------|-----------|
| MYO15B    | -5,429259738 | 1,62E-74  |
| LIMCH1    | -5,431779462 | 2,95E-32  |
| SIK1      | -5,441931567 | 0,000206  |
| RGS11     | -5,443854081 | 0,000736  |
| TBX20     | -5,447140627 | 1,80E-06  |
| PRRT3-AS1 | -5,463219662 | 6,75E-07  |
| CASP10    | -5,469403367 | 1,39E-17  |
| SRSF12    | -5,493314578 | 7,24E-06  |
| PPIEL     | -5,518231932 | 0,000617  |
| GPRIN3    | -5,530299296 | 8,69E-12  |
| TMEM9B-A  | -5,532777695 | 2,75E-05  |
| EDARADD   | -5,553727325 | 6,78E-32  |
| SYNM      | -5,566381572 | 2,14E-92  |
| RBP1      | -5,573363979 | 5,94E-18  |
| TNS4      | -5,581355187 | 1,00E-27  |
| ERO1B     | -5,60099644  | 3,04E-14  |
| RHBDL3    | -5,650189984 | 4,64E-43  |
| DNM3      | -5,655870126 | 2,65E-16  |
| SPX       | -5,659962691 | 4,01E-05  |
| MLLT11    | -5,667002517 | 3,85E-57  |
| CAPN2     | -5,670270472 | 4,74E-42  |
| DCBLD2    | -5,676329047 | 2,20E-117 |
| SPRY4     | -5,700984728 | 4,16E-43  |
| DKK3      | -5,709782595 | 8,61E-51  |
| SLC16A2   | -5,719265742 | 7,47E-37  |
| TMEM47    | -5,724070138 | 0,000188  |
| HAPLN3    | -5,731573908 | 1,50E-09  |
| SOX8      | -5,772917776 | 1,89E-05  |
| COL7A1    | -5,773856552 | 3,24E-49  |
| NRG2      | -5,776025589 | 3,07E-09  |
| CCDC106   | -5,788410053 | 2,17E-46  |
| C10orf54  | -5,820207762 | 3,33E-11  |
| TGFB111   | -5,83269486  | 0,000104  |
| MGAM      | -5,837272163 | 0,000246  |
| APOC1     | -5,841799293 | 6,54E-50  |
| ACOX2     | -5,858947479 | 3,15E-06  |
| EGFR      | -5,859844023 | 7,43E-112 |
| BIRC3     | -5,878648899 | 8,00E-27  |
| HLX       | -5,902939267 | 0,000116  |
| ABCC2     | -5,903072623 | 1,22E-28  |
| ABCC3     | -5,911883854 | 0,00022   |
| PCDHA3    | -5,934717691 | 1,69E-06  |
| ZDHHC2    | -5,941140173 | 4,17E-33  |
| PTGR1     | -5,951789554 | 2,39E-79  |
| JAG1      | -5,970665306 | 1,55E-185 |
| POPDC3    | -5,975135042 | 1,63E-21  |
| MMP24     | -5,979359604 | 2,35E-31  |
| ANKRD33B  | -5,981206838 | 3,08E-22  |
| SERPINE2  | -5,98788729  | 1,86E-118 |
| BST1      | -6,021102274 | 5,88E-07  |

|           |              |           |
|-----------|--------------|-----------|
| THSD1     | -6,035623182 | 4,00E-12  |
| PDE4B     | -6,045034888 | 1,13E-05  |
| TBXAS1    | -6,045402514 | 3,78E-27  |
| FRMD3     | -6,112733586 | 3,60E-68  |
| BRINP1    | -6,112875983 | 2,03E-05  |
| LINC00261 | -6,148855206 | 1,64E-05  |
| DUSP4     | -6,195718621 | 2,95E-07  |
| BIN1      | -6,203394986 | 2,73E-61  |
| ERICH5    | -6,205648102 | 3,91E-09  |
| IL15      | -6,233309996 | 1,73E-07  |
| PROS1     | -6,246950822 | 7,31E-37  |
| CYGB      | -6,252998599 | 9,20E-06  |
| EVA1C     | -6,255369945 | 1,72E-85  |
| DPYSL3    | -6,27320185  | 7,64E-102 |
| CECR7     | -6,285196483 | 7,01E-06  |
| TP63      | -6,37955558  | 2,00E-08  |
| MYEOV     | -6,382456464 | 3,32E-96  |
| CD14      | -6,401759103 | 5,59E-06  |
| TLE6      | -6,411156897 | 4,56E-06  |
| ALDH3B1   | -6,415697168 | 6,12E-39  |
| TRIML2    | -6,416556644 | 3,47E-24  |
| CD109     | -6,441374472 | 3,29E-122 |
| PAX7      | -6,457543068 | 1,17E-06  |
| PLA2G16   | -6,458505735 | 1,90E-80  |
| CA9       | -6,466777632 | 1,19E-07  |
| PLCL2     | -6,480200568 | 4,44E-14  |
| GPX2      | -6,483178776 | 0,000121  |
| STRA6     | -6,490081489 | 5,10E-07  |
| TRIM9     | -6,490868066 | 3,87E-28  |
| C2orf88   | -6,508852622 | 0,00067   |
| FOXC2     | -6,519491036 | 0,000715  |
| RBFOX3    | -6,52960923  | 1,39E-29  |
| ZNF717    | -6,541011717 | 1,26E-06  |
| CLMP      | -6,547018334 | 2,22E-11  |
| CACNG6    | -6,549582193 | 2,47E-08  |
| RASSF6    | -6,56105742  | 3,07E-08  |
| ZBTB18    | -6,561148061 | 3,66E-40  |
| PRKCA     | -6,567368569 | 1,87E-147 |
| SLC19A3   | -6,568259056 | 5,29E-09  |
| TM4SF1    | -6,56888982  | 2,19E-106 |
| CHGB      | -6,587705647 | 4,71E-20  |
| ME3       | -6,588148088 | 8,33E-30  |
| SERPINE1  | -6,589784092 | 5,78E-05  |
| SUCLG2-AS | -6,614966518 | 0,000452  |
| AKR1C2    | -6,641494988 | 1,62E-40  |
| REREP3    | -6,648333128 | 0,000407  |
| ARHGAP31  | -6,6500181   | 0,000425  |
| PKDCC     | -6,652533635 | 2,06E-36  |
| ETV4      | -6,65531902  | 1,94E-08  |
| EID3      | -6,671088906 | 0,000491  |

|           |              |           |
|-----------|--------------|-----------|
| FSTL1     | -6,671251218 | 1,45E-44  |
| FLRT2     | -6,678919565 | 0,000739  |
| PLCE1     | -6,704555929 | 2,25E-43  |
| C10orf90  | -6,713520999 | 0,000329  |
| ZBTB20    | -6,7420993   | 1,96E-20  |
| CCDC144A  | -6,746341878 | 0,000284  |
| ETV5      | -6,766815411 | 1,42E-67  |
| CCDC80    | -6,807263377 | 1,74E-71  |
| C1S       | -6,821408927 | 3,34E-24  |
| EMP1      | -6,839407612 | 1,63E-07  |
| PLSCR4    | -6,850534618 | 0,000207  |
| HS3ST1    | -6,859849049 | 0,000193  |
| TSPAN18   | -6,864334783 | 0,000229  |
| VTN       | -6,865183669 | 1,69E-07  |
| BANK1     | -6,86564829  | 0,000183  |
| MYRF      | -6,871827957 | 4,68E-06  |
| KRT7      | -6,904686532 | 7,60E-14  |
| BEAN1     | -6,948251832 | 0,00017   |
| SFRP4     | -6,950134084 | 1,05E-10  |
| TNC       | -6,968673651 | 5,41E-27  |
| PNMA2     | -7,002636207 | 5,54E-60  |
| IGFBP6    | -7,021136694 | 3,87E-59  |
| BDNF      | -7,064245195 | 9,66E-49  |
| FAR2P2    | -7,090796285 | 9,11E-05  |
| FMN2      | -7,093417355 | 7,57E-18  |
| S100A4    | -7,116218545 | 3,42E-87  |
| HNF4A     | -7,118130526 | 3,24E-41  |
| CPA4      | -7,125221766 | 4,80E-11  |
| DAB2      | -7,138272316 | 2,65E-37  |
| KLHDC7A   | -7,142069375 | 1,64E-08  |
| TTLL6     | -7,155134786 | 6,15E-08  |
| GATM      | -7,199631513 | 2,61E-12  |
| CYP24A1   | -7,202230368 | 5,53E-266 |
| OSBPL3    | -7,208629059 | 1,85E-43  |
| CDH2      | -7,223979277 | 9,31E-64  |
| CACNG7    | -7,230680156 | 4,27E-08  |
| KIFC3     | -7,235256138 | 9,20E-54  |
| SOX21     | -7,245743521 | 0,000947  |
| EPHA5-AS1 | -7,247370293 | 0,000965  |
| LINC01234 | -7,276812295 | 3,95E-38  |
| PPEF1     | -7,288467999 | 3,62E-05  |
| AKR1C1    | -7,289454746 | 6,32E-114 |
| USP44     | -7,302778445 | 0,000951  |
| LACAT8    | -7,305913028 | 0,000746  |
| FAM27E3   | -7,305913028 | 0,000746  |
| LIPE      | -7,323635321 | 3,62E-09  |
| KCNT2     | -7,330931367 | 0,000933  |
| GOS2      | -7,331861461 | 0,000774  |
| BAIAP2L2  | -7,332370284 | 5,16E-20  |
| CRYM      | -7,341162427 | 2,89E-05  |

|           |              |           |
|-----------|--------------|-----------|
| PPP1R3C   | -7,343759543 | 3,28E-09  |
| SYT13     | -7,351394606 | 5,22E-08  |
| STAT4     | -7,356978904 | 2,86E-09  |
| RNF144A-A | -7,360971006 | 0,000606  |
| LINC01085 | -7,361271778 | 0,000594  |
| LINC00488 | -7,361872544 | 0,000584  |
| PDE10A    | -7,385855949 | 1,70E-22  |
| GRIN2B    | -7,386837039 | 0,000688  |
| SLAMF7    | -7,387432647 | 0,000614  |
| RIMBP3    | -7,390089849 | 0,000534  |
| NRP2      | -7,3968404   | 2,07E-90  |
| KIAA2012  | -7,414872246 | 0,000513  |
| CYP27C1   | -7,415452645 | 0,000482  |
| ZC4H2     | -7,420797113 | 2,91E-09  |
| KIRREL3   | -7,431565727 | 3,68E-05  |
| ADAMTS16  | -7,440655904 | 0,000514  |
| PWARSN    | -7,441228326 | 0,000467  |
| LINC00312 | -7,441228326 | 0,000467  |
| ADAM12    | -7,445126059 | 4,27E-25  |
| ROBO1     | -7,452791889 | 6,36E-96  |
| PLA2G4A   | -7,454732497 | 1,63E-06  |
| NEK9      | -7,464831776 | 1,23E-05  |
| C3        | -7,469417969 | 1,68E-35  |
| CARD11    | -7,470183145 | 0,00041   |
| CRIP1     | -7,470722303 | 9,40E-125 |
| RAET1E    | -7,494734541 | 0,000339  |
| ARX       | -7,499285634 | 6,61E-10  |
| SLCO1B7   | -7,517252788 | 0,000379  |
| ZEB1      | -7,517430625 | 1,67E-59  |
| FGFBP1    | -7,523757069 | 0,000717  |
| NTS       | -7,533749627 | 1,09E-21  |
| ITGA1     | -7,541871704 | 1,48E-05  |
| HBQ1      | -7,54315017  | 0,000284  |
| VSX1      | -7,543944858 | 0,000272  |
| LOC101927 | -7,545003279 | 0,000284  |
| ACOT2     | -7,549137071 | 5,83E-45  |
| TIMD4     | -7,566759991 | 0,000277  |
| MAP3K7CL  | -7,56988729  | 0,000277  |
| LAMA5-AS1 | -7,570410132 | 0,000305  |
| BCHE      | -7,592043801 | 0,00022   |
| FXD2      | -7,59332369  | 0,000236  |
| LINC01322 | -7,594351563 | 0,000282  |
| HOXB8     | -7,596248149 | 2,87E-17  |
| SOGA3     | -7,599603896 | 3,16E-22  |
| IFI16     | -7,615562927 | 5,13E-10  |
| SBK3      | -7,615630874 | 0,000199  |
| BMPER     | -7,616638146 | 0,00021   |
| USP32P1   | -7,621294745 | 9,24E-06  |
| MYOM2     | -7,637349142 | 0,000199  |
| LOC102724 | -7,638590745 | 0,00018   |

|           |              |           |
|-----------|--------------|-----------|
| MAGI2-AS3 | -7,639086233 | 0,000181  |
| NID2      | -7,658486407 | 0,000257  |
| NCMAP     | -7,664374325 | 0,000257  |
| FAM133A   | -7,682237847 | 0,000168  |
| CSGALNAC  | -7,682496705 | 2,39E-31  |
| HAND2     | -7,683202137 | 0,00015   |
| CCK       | -7,683442508 | 0,000148  |
| FOXQ1     | -7,692379857 | 6,15E-23  |
| LINC00473 | -7,705433091 | 7,29E-15  |
| TMSB4Y    | -7,706065695 | 0,000133  |
| TLR3      | -7,724113798 | 0,000229  |
| PEAR1     | -7,726369654 | 1,34E-05  |
| IGFBP1    | -7,728106794 | 0,000123  |
| PACERR    | -7,747748726 | 0,000118  |
| SLC4A4    | -7,76341504  | 1,04E-23  |
| ITIH5     | -7,788703477 | 0,000115  |
| EPAS1     | -7,80885744  | 2,81E-126 |
| RARRES1   | -7,812613071 | 9,34E-05  |
| MRAP2     | -7,812613071 | 9,34E-05  |
| UGT2B7    | -7,813276218 | 0,000108  |
| KLHL4     | -7,816482095 | 5,85E-11  |
| KRT81     | -7,837121632 | 2,38E-14  |
| SLC10A4   | -7,842891571 | 5,54E-11  |
| RARA-AS1  | -7,848132803 | 0,000124  |
| LINC01273 | -7,852008825 | 7,09E-05  |
| GGT3P     | -7,852008825 | 7,09E-05  |
| DSC3      | -7,859706768 | 2,89E-11  |
| PRDM1     | -7,867454106 | 6,28E-11  |
| UNC5D     | -7,871944354 | 6,71E-05  |
| GALNT9    | -7,873216801 | 8,79E-05  |
| SPARC     | -7,88994262  | 5,73E-05  |
| SLC6A17   | -7,903648304 | 3,36E-11  |
| MYL9      | -7,906255586 | 9,56E-05  |
| C1QTNF1   | -7,91069587  | 1,71E-05  |
| GACAT2    | -7,912045102 | 8,28E-05  |
| KIAA1644  | -7,92872953  | 4,84E-05  |
| TNFAIP2   | -7,942410039 | 8,38E-77  |
| PHYHIP    | -7,947839427 | 4,67E-05  |
| ANXA1     | -7,955155203 | 6,04E-278 |
| AGMO      | -7,96551353  | 4,02E-05  |
| ANKS4B    | -7,967297183 | 5,38E-05  |
| SP9       | -7,977789235 | 1,43E-25  |
| LONRF3    | -7,981235969 | 1,83E-11  |
| F2        | -7,983949902 | 3,75E-05  |
| ACOT1     | -8,014706272 | 1,60E-06  |
| LOC101928 | -8,019559694 | 3,15E-05  |
| MAP7D2    | -8,031144442 | 3,69E-27  |
| EPS8L3    | -8,037134373 | 2,92E-05  |
| CA13      | -8,038455664 | 3,77E-05  |
| HACD4     | -8,053196698 | 2,65E-05  |

|           |              |          |
|-----------|--------------|----------|
| ITGA11    | -8,053568538 | 2,60E-05 |
| PLA1A     | -8,05580379  | 3,54E-05 |
| KCNE4     | -8,070736124 | 2,39E-05 |
| ZNF215    | -8,07110328  | 2,40E-05 |
| LAMA4     | -8,090992024 | 4,76E-05 |
| HOXB3     | -8,099851541 | 5,56E-17 |
| MIR100HG  | -8,117269755 | 1,03E-06 |
| GREM2     | -8,120158921 | 1,94E-05 |
| FST       | -8,16499402  | 8,16E-07 |
| DAPK1     | -8,176052154 | 3,60E-54 |
| ST6GALNA4 | -8,198657518 | 1,70E-05 |
| SCG2      | -8,200848001 | 1,26E-05 |
| IQGAP2    | -8,208421363 | 9,15E-53 |
| SLC6A15   | -8,215028872 | 1,26E-05 |
| TMBIM1    | -8,232491251 | 1,62E-76 |
| TMEM220   | -8,24591235  | 1,02E-05 |
| RAB38     | -8,246725273 | 1,01E-05 |
| GPC6      | -8,252496186 | 4,76E-18 |
| LOC100130 | -8,275829139 | 8,70E-06 |
| LINC01186 | -8,289768258 | 8,76E-06 |
| ZNF583    | -8,291819748 | 8,80E-06 |
| PDCD6IPP2 | -8,320190229 | 7,12E-06 |
| SYT15     | -8,321119813 | 8,41E-06 |
| C11orf70  | -8,324609999 | 4,15E-07 |
| CNTNAP3B  | -8,32588655  | 2,71E-23 |
| EBI3      | -8,334322313 | 6,57E-06 |
| SERPINB4  | -8,336479034 | 1,16E-05 |
| MICU3     | -8,34755975  | 6,07E-06 |
| NPR2      | -8,359406854 | 3,50E-07 |
| ZFP82     | -8,360372423 | 6,83E-06 |
| AFAP1L1   | -8,372287285 | 4,69E-13 |
| LINC00857 | -8,384822578 | 4,38E-13 |
| SNPH      | -8,397843315 | 6,82E-19 |
| PLCXD3    | -8,404146444 | 5,25E-06 |
| TFCP2     | -8,42625713  | 9,65E-05 |
| POU4F1    | -8,454231236 | 4,42E-06 |
| THY1      | -8,467228889 | 2,46E-07 |
| BATF3     | -8,47958685  | 1,87E-07 |
| HTR2B     | -8,495562203 | 3,28E-06 |
| CLIP4     | -8,509495607 | 1,11E-31 |
| TFPI2     | -8,52259241  | 1,39E-06 |
| CXCL3     | -8,522924849 | 2,01E-07 |
| C1RL      | -8,530600367 | 4,99E-25 |
| LOC101925 | -8,531202797 | 2,38E-06 |
| RNF212    | -8,554875316 | 2,45E-06 |
| LOC729970 | -8,5559286   | 2,05E-06 |
| LOC101927 | -8,557372403 | 2,31E-06 |
| ETV1      | -8,5629529   | 1,56E-07 |
| PSMB8     | -8,565253127 | 3,78E-23 |
| PROC      | -8,581788514 | 2,26E-06 |

|           |              |           |
|-----------|--------------|-----------|
| CRTAC1    | -8,582309288 | 2,70E-06  |
| HHIP-AS1  | -8,591792336 | 1,70E-06  |
| CSF2RA    | -8,601846264 | 2,46E-06  |
| SUSD5     | -8,603127675 | 1,69E-06  |
| MKRN3     | -8,604016801 | 1,58E-06  |
| GGT8P     | -8,604016801 | 1,58E-06  |
| TMEM156   | -8,610289905 | 5,81E-14  |
| CCAT1     | -8,616390614 | 1,59E-06  |
| ADH6      | -8,618296671 | 3,02E-06  |
| ST6GAL2   | -8,629270537 | 2,59E-07  |
| CDA       | -8,649200653 | 1,36E-06  |
| ANKRD30A  | -8,651292629 | 1,44E-06  |
| ADRA1B    | -8,660828986 | 1,22E-06  |
| LHX8      | -8,661926718 | 1,21E-06  |
| PHLDB2    | -8,666796947 | 3,99E-41  |
| RUNX3     | -8,668516815 | 1,22E-26  |
| NR1H4     | -8,675780159 | 2,90E-06  |
| FOXL2NB   | -8,685009153 | 1,23E-06  |
| PEG10     | -8,719858816 | 2,39E-16  |
| C8orf88   | -8,727062328 | 8,46E-07  |
| HPGD      | -8,728782301 | 5,98E-87  |
| GAPLINC   | -8,728811822 | 1,00E-06  |
| BICC1     | -8,748010139 | 3,01E-149 |
| EREG      | -8,751175328 | 5,94E-09  |
| ITGAX     | -8,760554909 | 8,04E-07  |
| CD70      | -8,765112996 | 2,92E-14  |
| AK5       | -8,779874871 | 6,42E-07  |
| EDNRA     | -8,782354229 | 9,73E-07  |
| TGM2      | -8,798065812 | 8,29E-91  |
| STAC      | -8,800603197 | 5,67E-07  |
| TNFRSF9   | -8,80104604  | 5,59E-07  |
| PRDM13    | -8,80104604  | 5,59E-07  |
| FBLN1     | -8,803525261 | 1,16E-06  |
| EBF1      | -8,820928644 | 5,09E-07  |
| ZFPM2-AS1 | -8,830387157 | 5,30E-07  |
| MMP2      | -8,834852678 | 6,24E-21  |
| PLAT      | -8,840971701 | 4,57E-07  |
| ALX4      | -8,850836266 | 4,35E-07  |
| P3H3      | -8,851379777 | 2,34E-08  |
| MAP1LC3A  | -8,859887349 | 4,82E-07  |
| CTS2      | -8,867022957 | 4,07E-85  |
| TRPA1     | -8,871631442 | 4,13E-07  |
| RRN3P1    | -8,880136455 | 3,74E-07  |
| ITIH2     | -8,892139589 | 5,30E-07  |
| ZNF559    | -8,899171804 | 3,47E-07  |
| CYB5R2    | -8,899378956 | 3,38E-07  |
| FAM71E1   | -8,910705087 | 3,92E-07  |
| COL4A2    | -8,916554407 | 1,74E-91  |
| LOC388282 | -8,933823823 | 1,18E-06  |
| GLIS3     | -8,959238903 | 9,17E-07  |



|           |              |           |
|-----------|--------------|-----------|
| C11orf45  | -8,964924019 | 2,33E-07  |
| FBXL7     | -8,965417983 | 2,33E-07  |
| SLIT3     | -8,9724057   | 6,65E-28  |
| PADI1     | -8,983075101 | 2,11E-07  |
| KCNJ2     | -8,992889946 | 2,08E-07  |
| A1CF      | -9,00128975  | 1,90E-07  |
| PTPN20    | -9,008580162 | 2,47E-07  |
| ZNF542P   | -9,009160258 | 2,06E-07  |
| FAM43B    | -9,027146572 | 1,73E-07  |
| CHMP1B2P  | -9,02724138  | 1,71E-07  |
| UCHL1     | -9,034402942 | 9,22E-19  |
| RNF217    | -9,039675476 | 1,73E-22  |
| SLC7A7    | -9,042404092 | 1,03E-20  |
| MAGEA6    | -9,057130583 | 1,22E-08  |
| STK33     | -9,062457818 | 1,37E-07  |
| ADRA1D    | -9,065270963 | 1,20E-08  |
| ZNF502    | -9,095209486 | 1,25E-07  |
| NRIP3     | -9,097016793 | 1,29E-07  |
| USH1C     | -9,104680196 | 1,57E-08  |
| LBH       | -9,124984763 | 3,79E-15  |
| TPM2      | -9,126228074 | 1,60E-169 |
| CD40      | -9,128471775 | 9,90E-08  |
| SDPR      | -9,131191014 | 2,15E-37  |
| APOBEC3C  | -9,1376624   | 1,01E-49  |
| SCN9A     | -9,149019049 | 4,56E-16  |
| LOC102723 | -9,16253964  | 9,96E-08  |
| STEAP2    | -9,167211822 | 6,36E-07  |
| KCNJ16    | -9,168719653 | 7,86E-08  |
| KRT222    | -9,170697851 | 1,03E-07  |
| CFI       | -9,177609158 | 7,52E-08  |
| DDC       | -9,184917147 | 6,96E-08  |
| GCNT2     | -9,20718121  | 9,08E-24  |
| ARSJ      | -9,223655664 | 8,10E-24  |
| UGT1A7    | -9,223889009 | 5,66E-08  |
| TMEFF2    | -9,225300193 | 8,18E-08  |
| TM4SF20   | -9,229726169 | 7,54E-08  |
| PRKCDBP   | -9,231706618 | 5,53E-08  |
| SOX17     | -9,238909799 | 5,17E-08  |
| GLI2      | -9,251194125 | 4,86E-38  |
| ALDH2     | -9,25733174  | 1,56E-104 |
| ZNF71     | -9,260292845 | 1,24E-16  |
| ALX1      | -9,262644343 | 5,86E-08  |
| GREM1     | -9,266956527 | 6,87E-08  |
| PWAR5     | -9,304592837 | 3,85E-08  |
| SMO       | -9,310849575 | 2,83E-24  |
| DGKG      | -9,315766108 | 1,41E-16  |
| LAYN      | -9,318332217 | 4,24E-08  |
| IGF2BP1   | -9,31892959  | 1,23E-130 |
| UGT1A1    | -9,321126023 | 4,58E-08  |
| KCNK3     | -9,324047351 | 1,73E-16  |

|           |              |           |
|-----------|--------------|-----------|
| CNTNAP3P  | -9,376057634 | 2,49E-08  |
| SLC17A3   | -9,38928707  | 2,25E-08  |
| GABRE     | -9,392295329 | 1,36E-07  |
| AADACP1   | -9,402834302 | 2,09E-08  |
| FAT3      | -9,409306186 | 2,04E-08  |
| AKR1C3    | -9,415412884 | 2,41E-07  |
| CYP3A5    | -9,425351598 | 4,17E-08  |
| FGF2      | -9,428118658 | 9,77E-33  |
| PAX6      | -9,435334076 | 1,95E-08  |
| PCSK5     | -9,435813317 | 1,50E-32  |
| SALL1     | -9,443581814 | 1,85E-08  |
| ANXA8L1   | -9,448599742 | 1,75E-08  |
| ANKRD1    | -9,456132063 | 5,26E-09  |
| MDFIC     | -9,465443859 | 1,89E-25  |
| TGFB1     | -9,47634008  | 4,67E-91  |
| ZEB2      | -9,486431652 | 1,87E-08  |
| C1RL-AS1  | -9,487541355 | 1,34E-08  |
| SRPX2     | -9,487747995 | 1,31E-08  |
| MID1      | -9,500584196 | 3,81E-173 |
| C11orf86  | -9,514786358 | 1,70E-08  |
| CDH6      | -9,553737777 | 1,20E-09  |
| APBB1IP   | -9,569900958 | 1,25E-08  |
| LINC00941 | -9,573583132 | 8,81E-09  |
| PRSS3     | -9,588228246 | 1,39E-08  |
| TLE4      | -9,59223833  | 1,05E-09  |
| CXCL1     | -9,593592277 | 1,02E-08  |
| FIGN      | -9,597087297 | 8,26E-09  |
| PAQR9     | -9,603255374 | 7,38E-09  |
| FLNC      | -9,606818776 | 2,33E-08  |
| BARX1     | -9,615006058 | 6,82E-09  |
| RBP4      | -9,626473573 | 6,57E-09  |
| LOC102723 | -9,632890656 | 5,82E-09  |
| TNFSF12   | -9,645206999 | 6,08E-09  |
| CFH       | -9,660527206 | 2,31E-18  |
| HOXB5     | -9,666242625 | 5,36E-09  |
| C7orf31   | -9,67187897  | 5,15E-09  |
| GJC1      | -9,682204611 | 1,77E-34  |
| SMIM6     | -9,684711463 | 5,08E-09  |
| PKD4      | -9,713030876 | 5,75E-06  |
| ZC3HAV1L  | -9,742402579 | 3,97E-09  |
| ANPEP     | -9,75695175  | 9,52E-09  |
| COL4A1    | -9,757136416 | 5,29E-27  |
| ARSI      | -9,765097835 | 2,87E-09  |
| MT1A      | -9,775775619 | 2,82E-09  |
| FYB       | -9,780018712 | 3,46E-10  |
| VCAN      | -9,80814943  | 8,53E-141 |
| MSC-AS1   | -9,820600242 | 2,21E-09  |
| ZFP28     | -9,839885432 | 2,60E-09  |
| UPK1B     | -9,84161919  | 1,83E-09  |
| FAM230C   | -9,866674858 | 1,72E-09  |

|           |              |          |
|-----------|--------------|----------|
| LINC01279 | -9,879503225 | 1,79E-09 |
| AGPS      | -9,880127021 | 1,94E-60 |
| TTY15     | -9,894878453 | 1,34E-09 |
| GIP       | -9,895345964 | 1,36E-09 |
| UTY       | -9,903553015 | 1,54E-09 |
| UGT1A9    | -9,915418962 | 1,66E-09 |
| NALCN     | -9,922949061 | 1,20E-09 |
| SMOC1     | -9,923153276 | 1,16E-09 |
| EMP3      | -9,960856511 | 2,63E-93 |
| PCDHA4    | -9,980906633 | 1,76E-09 |
| LINC00842 | -9,982437485 | 9,46E-10 |
| S100A3    | -10,00449068 | 1,11E-10 |
| PRKY      | -10,04074852 | 5,80E-10 |
| JAM3      | -10,04093639 | 5,82E-10 |
| FOXL2     | -10,05695026 | 6,56E-10 |
| BVES      | -10,0574645  | 5,58E-10 |
| RGS20     | -10,06646671 | 5,02E-10 |
| LINC01021 | -10,07055543 | 4,95E-10 |
| LINC00707 | -10,07323942 | 8,72E-10 |
| PHYHIPL   | -10,08802376 | 4,55E-10 |
| LINC00667 | -10,09187049 | 4,34E-10 |
| LSAMP     | -10,10670336 | 1,06E-09 |
| TIMP4     | -10,11022886 | 6,54E-11 |
| NLGN4Y    | -10,13313786 | 3,44E-10 |
| SAMD5     | -10,13460119 | 5,32E-10 |
| ZNF470    | -10,14080425 | 3,39E-10 |
| ADAMTS10  | -10,14194518 | 3,69E-10 |
| PPP1R16B  | -10,14367084 | 5,98E-11 |
| ZNF175    | -10,14908449 | 3,16E-10 |
| CXCL2     | -10,14912809 | 3,15E-10 |
| SLCO2B1   | -10,16115682 | 2,94E-10 |
| ADGRE1    | -10,16250207 | 3,98E-10 |
| ZNF300    | -10,18084231 | 2,64E-10 |
| SLC23A1   | -10,19583073 | 1,13E-09 |
| TNFSF15   | -10,20061307 | 2,54E-09 |
| MUC13     | -10,20250987 | 4,71E-10 |
| DACT2     | -10,23576662 | 2,14E-10 |
| GDA       | -10,2373529  | 4,98E-10 |
| ZNF773    | -10,24241638 | 1,86E-10 |
| MALL      | -10,25275207 | 6,19E-10 |
| IPW       | -10,25773146 | 1,69E-10 |
| CDIP1     | -10,26099018 | 1,69E-10 |
| SRGN      | -10,26133041 | 2,94E-11 |
| FOXA3     | -10,27780014 | 2,64E-10 |
| SGK2      | -10,30895757 | 1,26E-10 |
| C14orf105 | -10,32184736 | 2,99E-10 |
| RSP03     | -10,33603593 | 1,04E-66 |
| LYNX1     | -10,33688025 | 1,13E-10 |
| SLFN13    | -10,34088249 | 1,05E-10 |
| ZNF229    | -10,38899147 | 8,14E-11 |

|           |              |           |
|-----------|--------------|-----------|
| HABP2     | -10,42622588 | 4,03E-10  |
| SCARA5    | -10,43041705 | 7,30E-11  |
| HRH1      | -10,44255101 | 5,92E-11  |
| NKX2-5    | -10,46244582 | 5,27E-11  |
| INSL4     | -10,46625618 | 5,77E-11  |
| MIR31HG   | -10,46935563 | 5,47E-11  |
| NID1      | -10,51339309 | 3,97E-11  |
| HHIP      | -10,52829952 | 3,71E-11  |
| HKDC1     | -10,5345566  | 3,27E-32  |
| PPP1R14A  | -10,56323942 | 6,74E-12  |
| SPP1      | -10,58202798 | 2,70E-07  |
| LIN28B    | -10,58297431 | 2,67E-11  |
| HOXA10    | -10,58407519 | 3,06E-11  |
| ZNF280A   | -10,59291822 | 2,85E-11  |
| EPHA5     | -10,60376381 | 2,34E-11  |
| TWIST2    | -10,61953992 | 2,72E-11  |
| MPV17L    | -10,62536166 | 2,67E-11  |
| PLD5      | -10,62542522 | 2,75E-11  |
| LDHB      | -10,65127597 | 0,000297  |
| CPLX2     | -10,65303675 | 1,10E-26  |
| BCO1      | -10,67620575 | 1,79E-11  |
| ALDH3A1   | -10,683511   | 1,28E-22  |
| DLL3      | -10,69248262 | 1,47E-11  |
| FOXE1     | -10,70284658 | 1,34E-11  |
| SLC35G2   | -10,72417456 | 1,29E-11  |
| ZNF280B   | -10,73983239 | 1,39E-11  |
| WT1       | -10,76237429 | 9,62E-12  |
| CACNA1G   | -10,76555783 | 1,11E-11  |
| LGSN      | -10,77219283 | 9,15E-12  |
| DPYD      | -10,78312885 | 8,43E-12  |
| SEC14L4   | -10,79373123 | 8,31E-12  |
| HECW1     | -10,79409667 | 9,31E-12  |
| PRKCQ-AS1 | -10,80135362 | 7,83E-12  |
| LOC100505 | -10,81736515 | 9,35E-12  |
| GLP2R     | -10,83970972 | 1,06E-11  |
| MARCH4    | -10,8692058  | 9,31E-12  |
| GSTP1     | -10,87639444 | 7,46E-164 |
| MSN       | -10,88627819 | 1,01E-10  |
| TCF4      | -10,89738944 | 4,33E-12  |
| HORMAD1   | -10,9094453  | 4,06E-12  |
| CARD6     | -10,91273555 | 5,16E-12  |
| GALNT5    | -10,95505611 | 3,91E-12  |
| ANO5      | -10,98368756 | 2,72E-12  |
| NT5E      | -10,9877719  | 2,57E-12  |
| HNF1A     | -10,98885261 | 3,32E-12  |
| MSC       | -10,99060587 | 4,91E-12  |
| PRKCQ     | -11,00141147 | 2,38E-12  |
| ZFHx4     | -11,01083736 | 3,81E-12  |
| CDH4      | -11,02203664 | 3,18E-12  |
| SPAG16    | -11,0352691  | 2,51E-12  |

|           |              |          |
|-----------|--------------|----------|
| GNG11     | -11,04032699 | 1,76E-24 |
| LOC400655 | -11,05736734 | 1,90E-12 |
| ZFY       | -11,07287044 | 1,56E-12 |
| ATP10A    | -11,07707844 | 1,52E-12 |
| GAL3ST1   | -11,07936262 | 4,41E-12 |
| IGFBP7    | -11,1277483  | 1,68E-12 |
| SLC35F3   | -11,16470184 | 9,76E-13 |
| AXL       | -11,16934016 | 1,47E-35 |
| DEPDC7    | -11,17660211 | 9,06E-13 |
| NPY4R     | -11,18765614 | 9,19E-13 |
| TLR6      | -11,24348572 | 7,09E-13 |
| KDM5D     | -11,2745397  | 4,89E-13 |
| FOXF2     | -11,29181065 | 5,08E-13 |
| ASB4      | -11,3007182  | 5,08E-13 |
| HMGA2     | -11,30877407 | 1,24E-13 |
| USP9Y     | -11,32230084 | 4,47E-13 |
| THSD7A    | -11,33877423 | 5,49E-13 |
| SFRP5     | -11,33900402 | 3,23E-12 |
| NEFL      | -11,34830377 | 3,28E-13 |
| GSPT2     | -11,34983341 | 3,13E-13 |
| ZBED2     | -11,35174828 | 4,91E-12 |
| C2CD2     | -11,35264011 | 3,27E-13 |
| APOH      | -11,35873688 | 8,18E-13 |
| OSR1      | -11,37490798 | 7,47E-14 |
| GPRIN2    | -11,37591047 | 2,71E-13 |
| PDE1C     | -11,38095019 | 2,60E-13 |
| C5orf42   | -11,44782549 | 1,75E-13 |
| ANXA13    | -11,52101099 | 9,06E-13 |
| DFNA5     | -11,53291566 | 1,10E-13 |
| TXLNGY    | -11,62972842 | 6,12E-14 |
| TSPAN7    | -11,63219993 | 6,74E-14 |
| ZNF518B   | -11,6437141  | 6,24E-14 |
| SDHAF3    | -11,6524805  | 5,50E-14 |
| CDH17     | -11,66287943 | 2,99E-13 |
| PON3      | -11,66550951 | 7,60E-14 |
| TDRP      | -11,66571392 | 4,80E-14 |
| FGL1      | -11,67172881 | 1,14E-13 |
| FGA       | -11,69539062 | 4,44E-14 |
| CES1      | -11,71254828 | 5,80E-14 |
| FRG1CP    | -11,7328433  | 3,20E-14 |
| NIPAL4    | -11,76511532 | 2,81E-14 |
| CPNE8     | -11,81559621 | 2,23E-14 |
| TNFRSF10C | -11,88317218 | 1,33E-14 |
| MYOM3     | -11,91812856 | 2,31E-14 |
| ETS1      | -11,94245703 | 1,16E-14 |
| PDE3A     | -11,95003361 | 8,91E-15 |
| PNMAL1    | -11,95929039 | 1,11E-14 |
| SLCO1B3   | -11,98506365 | 7,71E-15 |
| GALNT13   | -12,01346458 | 5,95E-15 |
| EVC       | -12,0820133  | 4,53E-15 |

|         |              |           |
|---------|--------------|-----------|
| TCEAL8  | -12,09028266 | 4,10E-15  |
| ABCA1   | -12,09918558 | 3,54E-15  |
| AKR1B10 | -12,13610948 | 2,37E-29  |
| PTGS2   | -12,15652632 | 6,15E-57  |
| EIF1AY  | -12,16519943 | 2,37E-15  |
| VGLL3   | -12,17483744 | 2,63E-15  |
| SGCD    | -12,18297354 | 2,85E-15  |
| SFRP1   | -12,21872758 | 2,48E-15  |
| EYA4    | -12,22044304 | 1,75E-15  |
| CNKSR2  | -12,39211203 | 6,72E-16  |
| COL4A6  | -12,46119536 | 1,51E-16  |
| LPAR1   | -12,47125555 | 3,64E-16  |
| CYBRD1  | -12,47597273 | 3,52E-16  |
| SIGMAR1 | -12,49942016 | 1,55E-31  |
| ZCCHC11 | -12,51813002 | 2,82E-16  |
| IGF2BP3 | -12,54857538 | 2,26E-16  |
| SGCE    | -12,58165204 | 1,85E-16  |
| ALPK2   | -12,58921504 | 3,33E-16  |
| PDGFD   | -12,61463782 | 1,65E-16  |
| DZIP1   | -12,63323567 | 1,39E-16  |
| F2RL2   | -12,63460828 | 1,36E-16  |
| NR0B1   | -12,64145996 | 1,48E-16  |
| WBP5    | -12,67251918 | 1,20E-16  |
| GABRA5  | -12,81484126 | 5,28E-17  |
| CNN3    | -12,83149393 | 1,50E-17  |
| GNE     | -12,85254518 | 3,43E-17  |
| NNMT    | -12,87156386 | 3,34E-17  |
| HAVCR1  | -12,88142234 | 2,92E-17  |
| AKT3    | -12,88683176 | 2,91E-17  |
| GABRB3  | -12,90253532 | 1,03E-17  |
| PLAU    | -12,90527539 | 2,69E-17  |
| TMEM246 | -12,9065904  | 2,51E-17  |
| STK32B  | -12,98713566 | 1,59E-17  |
| TM4SF18 | -12,99579493 | 2,38E-17  |
| TBX18   | -13,02883031 | 1,29E-17  |
| PTPRM   | -13,12770682 | 7,57E-18  |
| PVRL3   | -13,19559675 | 4,23E-18  |
| AKR1B1  | -13,30521402 | 7,67E-100 |
| DDX3Y   | -13,30780865 | 2,22E-18  |
| MMP7    | -13,36861061 | 4,55E-18  |
| KIRREL  | -13,51470088 | 6,40E-19  |
| GPX1    | -13,58806295 | 3,90E-19  |
| NLRP2   | -13,61670414 | 2,77E-19  |
| INA     | -13,64222856 | 2,33E-19  |
| CXCL5   | -13,66109354 | 2,46E-19  |
| ARSE    | -13,79658144 | 1,26E-19  |
| SLC22A3 | -13,97683561 | 2,51E-20  |
| GRAMD1B | -14,03928964 | 1,97E-20  |
| ADD2    | -14,06950793 | 1,37E-20  |
| GCNT3   | -14,22440669 | 7,12E-21  |

|         |              |           |
|---------|--------------|-----------|
| HNFB    | -14,24690845 | 6,21E-21  |
| PAPPA   | -14,37392932 | 1,67E-21  |
| EMC10   | -14,38449147 | 1,57E-21  |
| CNTN1   | -14,45039623 | 6,09E-22  |
| NRG1    | -14,81406133 | 1,16E-22  |
| NTRK3   | -15,07357431 | 1,34E-23  |
| RPS4Y1  | -15,10364072 | 1,18E-23  |
| ALDH1A1 | -15,1695285  | 8,67E-128 |
| CLDN2   | -16,1057909  | 3,50E-26  |

## CCRF CEM

| Gene      | log2FoldCh | FDR       |
|-----------|------------|-----------|
| KRT18     | 18,51615   | 1,26E-35  |
| KRT19     | 18,18038   | 1,02E-32  |
| DSP       | 17,42377   | 4,18E-31  |
| CYP1B1    | 17,15096   | 3,83E-14  |
| CDH1      | 16,3574    | 2,10E-27  |
| BMP7      | 15,89041   | 4,39E-26  |
| LAPTM4B   | 15,85446   | 5,87E-26  |
| KRT8      | 15,63682   | 2,38E-200 |
| SEMA3C    | 15,56502   | 4,68E-25  |
| MYH14     | 15,46491   | 8,54E-24  |
| BCAR1     | 15,45553   | 7,72E-24  |
| S100A16   | 15,43406   | 7,64E-24  |
| TRPS1     | 15,42867   | 1,44E-24  |
| LAMC1     | 15,35392   | 2,52E-24  |
| S100A14   | 15,31161   | 1,63E-23  |
| FREM2     | 15,26203   | 4,59E-24  |
| TFAP2A    | 15,19738   | 6,65E-24  |
| SULF2     | 15,07961   | 1,51E-24  |
| FBP1      | 15,05246   | 2,82E-23  |
| AHR       | 15,02705   | 2,51E-23  |
| EMP2      | 14,99027   | 1,10E-22  |
| MAL2      | 14,98054   | 3,29E-23  |
| AP1M2     | 14,9564    | 4,98E-23  |
| STC2      | 14,92736   | 9,19E-08  |
| CDC42EP1  | 14,86987   | 7,01E-13  |
| TPD52L1   | 14,80713   | 5,09E-22  |
| PTPRS     | 14,72197   | 2,29E-22  |
| TFF1      | 14,71965   | 3,13E-21  |
| CLDN3     | 14,69582   | 2,92E-22  |
| PKP3      | 14,69019   | 5,58E-22  |
| SP5       | 14,67589   | 5,96E-22  |
| LAD1      | 14,6423    | 5,78E-22  |
| LDLOC1    | 14,64139   | 7,33E-22  |
| ST14      | 14,56582   | 1,90E-21  |
| PRICKLE2  | 14,51747   | 9,96E-21  |
| TSPYL5    | 14,51162   | 8,29E-22  |
| CD276     | 14,47934   | 2,25E-21  |
| SERPINB6  | 14,44954   | 1,27E-21  |
| TFAP2C    | 14,44625   | 2,00E-21  |
| LTBR      | 14,36799   | 2,15E-21  |
| TACSTD2   | 14,35407   | 3,49E-21  |
| LAMA5     | 14,31598   | 3,08E-21  |
| LINC00674 | 14,23226   | 9,80E-21  |
| GRHL2     | 14,21003   | 1,53E-20  |
| RAB25     | 14,16411   | 1,17E-20  |
| C3orf14   | 14,11293   | 1,98E-20  |
| NR2F2     | 14,08434   | 1,96E-20  |
| TNFRSF19  | 14,08171   | 2,39E-20  |



|          |          |          |
|----------|----------|----------|
| STC1     | 14,05315 | 3,32E-20 |
| ZCCHC14  | 14,02077 | 2,33E-20 |
| MYO5B    | 14,01732 | 3,44E-20 |
| DSC2     | 13,97851 | 4,09E-20 |
| SPDEF    | 13,92611 | 6,24E-11 |
| SYTL2    | 13,90274 | 7,99E-20 |
| GDF15    | 13,88992 | 1,22E-12 |
| TJP1     | 13,88286 | 1,30E-19 |
| PRSS23   | 13,86001 | 7,94E-26 |
| EPN3     | 13,85371 | 9,79E-20 |
| PPP2R2C  | 13,8101  | 9,37E-20 |
| MISP     | 13,76527 | 1,33E-18 |
| RNF130   | 13,76028 | 1,89E-19 |
| MGST1    | 13,74427 | 2,34E-19 |
| NFIB     | 13,68009 | 3,10E-19 |
| ATP2C2   | 13,65958 | 1,21E-18 |
| DKK1     | 13,65883 | 8,06E-09 |
| PLS3     | 13,6093  | 4,26E-19 |
| ADRA2C   | 13,56806 | 9,32E-19 |
| ME1      | 13,5165  | 3,85E-18 |
| SOX13    | 13,50967 | 3,79E-18 |
| LRP3     | 13,46739 | 1,05E-18 |
| CCND1    | 13,4587  | 1,47E-65 |
| FAM83H-A | 13,41254 | 1,24E-18 |
| SRXN1    | 13,40231 | 8,37E-18 |
| TMEM30B  | 13,37273 | 2,09E-18 |
| ZNF503   | 13,30989 | 2,55E-18 |
| RBM47    | 13,30335 | 5,09E-18 |
| MSI1     | 13,29654 | 3,83E-18 |
| CTBP2    | 13,29073 | 1,78E-19 |
| IMPACT   | 13,27893 | 4,06E-18 |
| DOCK6    | 13,27273 | 3,69E-18 |
| CBR1     | 13,27125 | 5,77E-18 |
| BGN      | 13,25814 | 3,18E-06 |
| GYLTL1B  | 13,2481  | 7,84E-18 |
| TEAD1    | 13,24295 | 3,80E-18 |
| KITLG    | 13,22645 | 5,11E-18 |
| SLC7A2   | 13,22341 | 6,19E-18 |
| DSCAM-AS | 13,21847 | 9,67E-11 |
| RHOD     | 13,19143 | 2,26E-17 |
| AGAP1    | 13,12737 | 9,72E-18 |
| MAP7     | 13,12558 | 8,01E-18 |
| MSX2     | 13,07628 | 2,74E-17 |
| PMEPA1   | 13,06526 | 1,78E-17 |
| HOXC10   | 13,05353 | 1,51E-17 |
| SELENBP1 | 13,04542 | 1,84E-17 |
| HSPB8    | 12,99472 | 6,28E-17 |
| GAL      | 12,98983 | 1,92E-17 |
| BAIAP2L1 | 12,95784 | 2,63E-17 |
| CYB5A    | 12,92483 | 5,78E-17 |

|          |          |           |
|----------|----------|-----------|
| MLPH     | 12,89886 | 3,87E-17  |
| FAM127C  | 12,87746 | 4,40E-17  |
| PBX1     | 12,86361 | 5,11E-16  |
| GGT6     | 12,84646 | 6,51E-16  |
| BASP1    | 12,83757 | 3,64E-09  |
| WDR72    | 12,83035 | 5,63E-17  |
| SYT12    | 12,8302  | 2,60E-16  |
| PTK2     | 12,8292  | 3,19E-18  |
| KCNJ8    | 12,82906 | 6,51E-17  |
| PCDHA6   | 12,80737 | 6,76E-17  |
| AFAP1    | 12,79925 | 1,01E-16  |
| PRSS8    | 12,76838 | 4,74E-18  |
| INADL    | 12,7615  | 8,60E-17  |
| FGFR4    | 12,76046 | 1,59E-17  |
| TBX3     | 12,70983 | 1,21E-16  |
| PRLR     | 12,69977 | 1,62E-16  |
| CA12     | 12,68942 | 4,37E-09  |
| ACSS3    | 12,67222 | 9,19E-18  |
| LINGO1   | 12,67138 | 1,64E-16  |
| KCNG1    | 12,66449 | 1,19E-15  |
| PRR15L   | 12,6635  | 3,89E-16  |
| EEF1A2   | 12,63661 | 1,84E-125 |
| PKP2     | 12,61244 | 9,44E-16  |
| PPP1R26  | 12,59384 | 3,25E-16  |
| IRX2     | 12,5883  | 2,89E-16  |
| MARVELD3 | 12,56409 | 1,42E-15  |
| HTRA1    | 12,56293 | 3,30E-16  |
| CYP1A1   | 12,54748 | 8,88E-17  |
| FXD3     | 12,53046 | 5,64E-09  |
| SHROOM3  | 12,50753 | 4,13E-16  |
| SPTSSB   | 12,4645  | 6,87E-15  |
| DYNC1I1  | 12,46434 | 5,41E-16  |
| ELF3     | 12,45258 | 1,32E-14  |
| CTSL     | 12,4488  | 2,08E-15  |
| PPP1R9A  | 12,4464  | 7,55E-16  |
| ARHGAP39 | 12,4458  | 1,18E-15  |
| KIF1A    | 12,42522 | 7,76E-16  |
| COLEC12  | 12,41457 | 5,75E-15  |
| CDH3     | 12,39311 | 1,03E-57  |
| IGFBP5   | 12,38006 | 2,49E-15  |
| LRP2     | 12,37994 | 3,22E-05  |
| APCDD1   | 12,37845 | 1,61E-81  |
| NEBL     | 12,36335 | 1,17E-15  |
| AREG     | 12,36208 | 7,21E-15  |
| SYK      | 12,35697 | 1,18E-15  |
| PLEKHA6  | 12,33736 | 1,33E-15  |
| ESR1     | 12,33191 | 9,28E-17  |
| THBS1    | 12,329   | 7,69E-15  |
| GNG12    | 12,32498 | 1,51E-15  |
| DUSP23   | 12,32405 | 1,34E-15  |

|           |          |          |
|-----------|----------|----------|
| SH3D19    | 12,31592 | 1,45E-15 |
| PLOD2     | 12,31197 | 1,40E-15 |
| KIAA1671  | 12,30931 | 1,54E-15 |
| CACNG4    | 12,30361 | 1,89E-15 |
| DCLK1     | 12,29887 | 1,69E-15 |
| STEAP3    | 12,29656 | 2,72E-15 |
| KYNU      | 12,28447 | 7,42E-15 |
| RHBDF1    | 12,28426 | 1,64E-15 |
| GPD1L     | 12,26612 | 2,55E-15 |
| SPG20     | 12,25089 | 2,13E-15 |
| ADIRF     | 12,23746 | 5,59E-14 |
| CCDC50    | 12,231   | 3,37E-15 |
| KRTAP5-AS | 12,21872 | 1,40E-05 |
| ANK3      | 12,21383 | 3,37E-15 |
| SIX4      | 12,20777 | 3,07E-15 |
| PCDH18    | 12,19331 | 9,70E-14 |
| CLU       | 12,19203 | 5,13E-19 |
| LOC101927 | 12,18592 | 1,07E-14 |
| NEK6      | 12,18512 | 3,33E-15 |
| PCDHA11   | 12,1819  | 5,22E-15 |
| SECTM1    | 12,18019 | 6,15E-14 |
| DIRAS1    | 12,17753 | 3,32E-15 |
| MARC1     | 12,1759  | 3,24E-15 |
| SDC1      | 12,17182 | 2,56E-16 |
| TSPAN6    | 12,16036 | 3,58E-15 |
| CADM1     | 12,13663 | 4,53E-15 |
| PCLO      | 12,13489 | 5,54E-15 |
| IL13RA1   | 12,12479 | 6,70E-15 |
| RBBP8NL   | 12,12283 | 7,21E-15 |
| PPL       | 12,12137 | 1,79E-27 |
| DTNA      | 12,09743 | 1,05E-14 |
| DLX5      | 12,07542 | 7,16E-15 |
| UNC13B    | 12,07404 | 9,77E-15 |
| LIN7A     | 12,06416 | 1,11E-14 |
| STARD13   | 12,06099 | 1,17E-14 |
| FAM83B    | 12,05878 | 6,78E-15 |
| C15orf59  | 12,05288 | 3,50E-14 |
| C9orf152  | 12,04599 | 1,99E-14 |
| FBXO27    | 12,03307 | 8,44E-15 |
| MYOF      | 12,03072 | 1,69E-26 |
| GALNT16   | 12,0229  | 1,24E-05 |
| PCDH1     | 12,01945 | 1,16E-14 |
| PERP      | 12,0093  | 1,98E-15 |
| NHS       | 12,00149 | 3,13E-14 |
| CCDC170   | 12,00096 | 1,57E-13 |
| NEB       | 11,984   | 1,07E-14 |
| SLC1A2    | 11,98377 | 1,18E-14 |
| ARHGEF5   | 11,97137 | 2,04E-14 |
| THEM4     | 11,96514 | 1,17E-14 |
| C14orf132 | 11,93543 | 1,44E-14 |

|         |          |          |
|---------|----------|----------|
| IGSF9   | 11,93418 | 2,78E-28 |
| PCSK1N  | 11,9307  | 1,56E-14 |
| ALDH3A2 | 11,92995 | 2,10E-28 |
| RASEF   | 11,92785 | 1,69E-14 |
| OLFM1   | 11,92128 | 1,55E-14 |
| KLF11   | 11,90703 | 2,70E-13 |
| PLK2    | 11,83897 | 8,42E-14 |
| VWA1    | 11,83851 | 4,59E-14 |
| SKAP2   | 11,83813 | 3,05E-14 |
| WNT5A   | 11,81851 | 6,78E-14 |
| NUDT16  | 11,81696 | 4,63E-14 |
| GPX8    | 11,81012 | 3,95E-14 |
| FAM50B  | 11,80919 | 3,31E-14 |
| HOOK1   | 11,8078  | 3,13E-14 |
| PVRL4   | 11,7956  | 3,37E-14 |
| SERTAD4 | 11,79059 | 7,81E-14 |
| ABCA3   | 11,78856 | 1,21E-25 |
| NPY1R   | 11,78779 | 5,34E-14 |
| ZIC1    | 11,77298 | 1,02E-13 |
| EPHB2   | 11,76664 | 4,01E-14 |
| OAT     | 11,76459 | 2,02E-13 |
| ERICH2  | 11,76307 | 1,29E-13 |
| CAP2    | 11,76027 | 4,22E-14 |
| RAB3IL1 | 11,744   | 2,74E-13 |
| CHMP4C  | 11,73214 | 1,10E-13 |
| CLDN4   | 11,73026 | 7,62E-26 |
| SNX9    | 11,72336 | 5,66E-14 |
| ASAP2   | 11,71522 | 3,46E-15 |
| ESPN    | 11,71433 | 5,35E-13 |
| ARFGEF3 | 11,71012 | 1,23E-13 |
| DOCK1   | 11,7069  | 7,71E-14 |
| DIP2C   | 11,69664 | 6,18E-14 |
| ALOX15  | 11,68684 | 1,52E-12 |
| KDF1    | 11,6769  | 8,54E-14 |
| ERRFI1  | 11,67351 | 2,36E-13 |
| KIF16B  | 11,66894 | 1,46E-13 |
| PSD3    | 11,66843 | 8,10E-14 |
| GPRC5C  | 11,66807 | 8,63E-14 |
| AR      | 11,65388 | 8,40E-14 |
| CEMIP   | 11,6441  | 2,39E-13 |
| GRHL3   | 11,6283  | 1,35E-13 |
| P2RY2   | 11,60711 | 1,14E-14 |
| TBX2    | 11,58989 | 1,22E-13 |
| PARVA   | 11,57995 | 1,77E-13 |
| SMIM22  | 11,57988 | 1,76E-13 |
| NUPR1   | 11,5793  | 5,74E-10 |
| CYP2J2  | 11,55625 | 4,12E-13 |
| IRS2    | 11,53132 | 7,70E-13 |
| SLC2A8  | 11,51409 | 3,44E-13 |
| MECOM   | 11,51187 | 2,16E-13 |

|          |          |          |
|----------|----------|----------|
| TMEM37   | 11,50285 | 2,72E-13 |
| CC2D2A   | 11,49915 | 2,54E-13 |
| MATN2    | 11,48804 | 2,66E-13 |
| TMEM54   | 11,48792 | 1,30E-14 |
| ITPRIPL2 | 11,47796 | 2,64E-13 |
| WNT7B    | 11,47671 | 6,82E-13 |
| IRF6     | 11,46702 | 3,36E-13 |
| PALM     | 11,46217 | 3,03E-13 |
| THSD4    | 11,46106 | 4,68E-13 |
| ARNT2    | 11,45887 | 3,23E-13 |
| EPHB3    | 11,45768 | 4,42E-13 |
| C5orf38  | 11,45545 | 4,87E-13 |
| PCP4     | 11,44742 | 3,34E-13 |
| SDC2     | 11,43898 | 3,10E-13 |
| INHBB    | 11,42692 | 4,73E-13 |
| MNX1-AS1 | 11,41911 | 8,91E-13 |
| RASAL2   | 11,41693 | 3,64E-13 |
| P2RY6    | 11,4105  | 0,000213 |
| CCDC149  | 11,40415 | 4,26E-13 |
| RHOB     | 11,38919 | 4,37E-89 |
| ETNK2    | 11,3746  | 9,74E-14 |
| SCARA3   | 11,35396 | 7,84E-13 |
| FAM84B   | 11,34459 | 6,89E-33 |
| SRGAP1   | 11,33887 | 1,06E-12 |
| OVOL1    | 11,33452 | 1,73E-12 |
| WASF3    | 11,32761 | 5,91E-13 |
| NUDT12   | 11,32577 | 7,52E-13 |
| SYT17    | 11,318   | 6,26E-13 |
| ENTPD2   | 11,30987 | 1,69E-12 |
| GRTP1    | 11,29903 | 9,32E-13 |
| EFS      | 11,2736  | 9,71E-13 |
| CRMP1    | 11,2659  | 1,20E-12 |
| KRT7     | 11,26375 | 3,53E-11 |
| TDRD1    | 11,25549 | 9,36E-13 |
| ILDR1    | 11,25003 | 9,90E-13 |
| PHLDA2   | 11,2436  | 1,01E-11 |
| EDN1     | 11,23605 | 4,14E-12 |
| DLX3     | 11,23105 | 1,60E-13 |
| PLEKHA1  | 11,22036 | 1,36E-12 |
| HOXC13   | 11,19725 | 2,18E-12 |
| FAM46B   | 11,19593 | 2,43E-12 |
| PTGES    | 11,19333 | 9,05E-12 |
| TMC4     | 11,19264 | 1,42E-13 |
| MAFIP    | 11,19047 | 1,94E-12 |
| NUAK1    | 11,18851 | 1,49E-12 |
| RANBP17  | 11,18031 | 2,47E-12 |
| LAMB1    | 11,16855 | 3,25E-46 |
| TEAD2    | 11,16429 | 1,11E-43 |
| PRSS16   | 11,15806 | 2,89E-12 |
| DPYSL5   | 11,13234 | 2,91E-12 |

|           |          |          |
|-----------|----------|----------|
| KCNK15    | 11,11781 | 2,59E-12 |
| B3GNT3    | 11,11376 | 2,44E-11 |
| THNSL2    | 11,11118 | 4,17E-12 |
| WDR35     | 11,10741 | 3,21E-12 |
| FIBCD1    | 11,10458 | 3,77E-11 |
| LDLRAD3   | 11,10191 | 3,39E-12 |
| EFHD1     | 11,09877 | 4,05E-12 |
| TMEM132/  | 11,09169 | 2,60E-10 |
| KLF4      | 11,09139 | 3,13E-12 |
| PGR       | 11,07427 | 1,14E-10 |
| WWC2      | 11,06974 | 3,02E-12 |
| MIPOL1    | 11,06711 | 2,96E-12 |
| TMEM144   | 11,0554  | 6,43E-12 |
| NXPH4     | 11,05475 | 1,99E-13 |
| TUSC1     | 11,05437 | 3,16E-12 |
| CST1      | 11,0504  | 3,79E-12 |
| MID2      | 11,04632 | 4,42E-12 |
| MFAP2     | 11,04524 | 3,57E-12 |
| MB        | 11,04265 | 3,38E-12 |
| MBNL2     | 11,02726 | 3,71E-12 |
| NETO2     | 11,02237 | 7,03E-24 |
| TMEM51    | 11,01316 | 4,39E-12 |
| FAM3B     | 11,01229 | 4,20E-12 |
| SH2D4A    | 11,00398 | 4,30E-12 |
| GPRC5A    | 10,99    | 2,08E-10 |
| RNF182    | 10,98612 | 1,59E-11 |
| PANX2     | 10,97237 | 1,41E-10 |
| MPDZ      | 10,97093 | 7,95E-12 |
| KNDC1     | 10,96897 | 6,24E-11 |
| ARHGEF10I | 10,96271 | 5,56E-12 |
| DCDC2     | 10,96037 | 6,28E-12 |
| NES       | 10,9596  | 6,24E-12 |
| WNK2      | 10,9436  | 4,13E-13 |
| SDC4      | 10,93372 | 5,58E-13 |
| ITGB5     | 10,93115 | 8,47E-16 |
| C1orf115  | 10,91671 | 7,76E-12 |
| HPN       | 10,90638 | 1,15E-11 |
| MET       | 10,89082 | 1,88E-23 |
| RET       | 10,87253 | 7,15E-11 |
| EPPK1     | 10,86809 | 3,24E-20 |
| PPFIBP2   | 10,86724 | 1,06E-11 |
| FOXA1     | 10,85615 | 1,15E-53 |
| GLTSCR1   | 10,84876 | 5,99E-13 |
| C7orf13   | 10,82602 | 1,30E-11 |
| KIF26A    | 10,82483 | 2,05E-12 |
| SPESP1    | 10,81783 | 2,10E-11 |
| LINC01296 | 10,80333 | 1,98E-11 |
| MBOAT2    | 10,80284 | 1,47E-11 |
| CCDC64B   | 10,79587 | 2,41E-11 |
| AKR1C2    | 10,78875 | 2,55E-10 |

|           |          |          |
|-----------|----------|----------|
| OSMR      | 10,78361 | 4,12E-11 |
| GPX3      | 10,77591 | 0,000145 |
| MLF1      | 10,76834 | 2,15E-11 |
| TMEM125   | 10,75566 | 1,95E-11 |
| GADD45G   | 10,74748 | 1,36E-10 |
| FAM198B   | 10,74134 | 2,17E-11 |
| KALRN     | 10,73844 | 8,47E-11 |
| HES2      | 10,73431 | 7,13E-10 |
| FAM114A1  | 10,72302 | 1,09E-10 |
| WNT11     | 10,71032 | 3,06E-10 |
| ATOH8     | 10,69233 | 7,73E-11 |
| DGAT2     | 10,68214 | 3,74E-11 |
| ODAM      | 10,67355 | 3,20E-11 |
| CMTM4     | 10,67284 | 3,76E-32 |
| PTPRG-AS1 | 10,67171 | 3,64E-11 |
| MYO1E     | 10,65802 | 1,02E-10 |
| ARHGEF35  | 10,65744 | 4,97E-11 |
| DMKN      | 10,6544  | 3,61E-11 |
| LRRC75B   | 10,64987 | 4,09E-11 |
| CNKS3     | 10,64446 | 4,36E-11 |
| LHX4      | 10,62997 | 1,94E-12 |
| TSPEAR    | 10,62884 | 9,10E-11 |
| SPECC1    | 10,62456 | 1,60E-31 |
| TTC12     | 10,62058 | 4,40E-11 |
| RAB36     | 10,6185  | 5,60E-11 |
| TMC5      | 10,60644 | 6,01E-11 |
| LINC00886 | 10,60089 | 2,36E-10 |
| SLC9A2    | 10,59679 | 6,12E-40 |
| EFNB3     | 10,59628 | 5,33E-11 |
| TBC1D12   | 10,56878 | 6,15E-11 |
| DUXAP8    | 10,56066 | 6,31E-11 |
| FERMT1    | 10,55087 | 6,79E-11 |
| CPE       | 10,54833 | 7,72E-11 |
| EHF       | 10,54811 | 1,27E-10 |
| BAMBI     | 10,54602 | 4,65E-76 |
| PCDHA10   | 10,54429 | 8,67E-11 |
| SULT2B1   | 10,50616 | 5,98E-12 |
| CELSR1    | 10,50233 | 1,57E-21 |
| FBN2      | 10,48959 | 2,96E-10 |
| P3H2      | 10,48735 | 1,08E-10 |
| LRRC49    | 10,48145 | 1,04E-10 |
| CASC9     | 10,47211 | 1,08E-10 |
| LRIG3     | 10,46339 | 1,42E-10 |
| SHISA9    | 10,45879 | 1,74E-10 |
| WSCD1     | 10,44024 | 1,62E-10 |
| HSPG2     | 10,43908 | 7,64E-12 |
| PAQR5     | 10,43893 | 1,49E-10 |
| CDS1      | 10,43867 | 4,28E-21 |
| MEIS3P1   | 10,43545 | 1,80E-10 |
| SNTB1     | 10,43338 | 3,54E-21 |

|           |          |          |
|-----------|----------|----------|
| SLC12A8   | 10,4234  | 1,91E-10 |
| CACNA2D1  | 10,42211 | 1,48E-10 |
| RBPMS     | 10,41511 | 6,33E-12 |
| CACHD1    | 10,40505 | 8,32E-10 |
| CHRM1     | 10,39072 | 6,14E-10 |
| MORN4     | 10,3897  | 1,98E-10 |
| HIST3H2A  | 10,38683 | 1,82E-10 |
| LMCD1     | 10,38578 | 9,96E-09 |
| HCN4      | 10,36633 | 2,10E-10 |
| HLA-DQB1  | 10,36614 | 7,28E-09 |
| RNF223    | 10,36555 | 2,62E-10 |
| CNTNAP2   | 10,36447 | 2,90E-10 |
| IGFBP3    | 10,35669 | 3,42E-09 |
| ERBB3     | 10,35425 | 1,01E-07 |
| ELOVL2    | 10,35329 | 2,38E-10 |
| HOXC11    | 10,34814 | 3,69E-10 |
| ZNF467    | 10,33957 | 5,96E-30 |
| SPIN3     | 10,33575 | 2,46E-10 |
| NSUN7     | 10,3232  | 2,81E-10 |
| PLD1      | 10,31485 | 3,20E-10 |
| ARHGEF37  | 10,31312 | 3,58E-10 |
| TNS1      | 10,31094 | 5,53E-10 |
| KRTAP3-1  | 10,29714 | 1,25E-09 |
| BCAS1     | 10,29517 | 2,38E-09 |
| EXD3      | 10,28631 | 5,65E-10 |
| ZNF532    | 10,28442 | 3,37E-10 |
| TFF3      | 10,28278 | 4,37E-10 |
| ZYG11A    | 10,28203 | 1,04E-09 |
| LINC00052 | 10,27757 | 4,27E-09 |
| C18orf63  | 10,27563 | 4,93E-10 |
| RERG      | 10,26471 | 3,85E-10 |
| OTUB2     | 10,26299 | 3,28E-09 |
| SALL4     | 10,25412 | 7,25E-10 |
| ERVMER34  | 10,24829 | 1,07E-09 |
| NMNAT2    | 10,23804 | 5,72E-10 |
| THAP10    | 10,23432 | 8,67E-10 |
| PXDC1     | 10,2295  | 5,48E-10 |
| FKBP10    | 10,22614 | 2,23E-06 |
| ALDH1A3   | 10,22389 | 1,97E-08 |
| EN2       | 10,21414 | 5,10E-10 |
| UGGT2     | 10,20854 | 5,90E-10 |
| GOLT1A    | 10,20203 | 5,73E-10 |
| DUSP9     | 10,1981  | 6,13E-10 |
| LINC00925 | 10,19722 | 6,33E-10 |
| OVOL2     | 10,19675 | 7,71E-09 |
| ERBB4     | 10,18995 | 9,17E-10 |
| MLXIPL    | 10,18632 | 9,65E-10 |
| LPIN3     | 10,17608 | 1,46E-19 |
| ZBED9     | 10,17489 | 6,44E-10 |
| NPAS2     | 10,16143 | 1,05E-09 |



|           |          |          |
|-----------|----------|----------|
| SLC24A3   | 10,1313  | 8,52E-10 |
| ZNF732    | 10,12637 | 1,68E-09 |
| GREB1L    | 10,10877 | 1,45E-08 |
| GALNT18   | 10,09061 | 1,15E-09 |
| ASCL1     | 10,09036 | 2,24E-09 |
| FAM110B   | 10,08991 | 1,49E-09 |
| PLEKHN1   | 10,08655 | 1,20E-09 |
| BLVRB     | 10,084   | 2,38E-08 |
| PCDH7     | 10,08396 | 1,29E-09 |
| CAMK2B    | 10,06505 | 1,24E-09 |
| ADGRL2    | 10,06371 | 1,46E-09 |
| LYPD1     | 10,05952 | 2,17E-09 |
| SDK1      | 10,05082 | 1,82E-09 |
| CDKN2B    | 10,04813 | 2,42E-09 |
| C12orf56  | 10,03844 | 1,58E-09 |
| EPHA6     | 10,02591 | 1,62E-09 |
| FAR2P1    | 10,02434 | 1,08E-08 |
| EPHA2     | 10,02037 | 3,87E-09 |
| TEAD4     | 10,01548 | 5,51E-26 |
| ADGRV1    | 10,01533 | 4,29E-09 |
| LGR4      | 10,01466 | 2,15E-09 |
| KCNC3     | 10,00401 | 6,14E-19 |
| ANKRD18B  | 10,00212 | 2,15E-09 |
| SLC9A4    | 9,999145 | 1,06E-08 |
| SLC26A4-A | 9,998752 | 1,92E-09 |
| ARC       | 9,990127 | 2,96E-08 |
| ELF5      | 9,988684 | 1,40E-08 |
| CSTA      | 9,985364 | 4,57E-09 |
| MEIS3     | 9,98523  | 7,95E-09 |
| UPK2      | 9,98102  | 3,32E-08 |
| TMEM136   | 9,978068 | 3,02E-09 |
| PRIMA1    | 9,973736 | 9,19E-09 |
| WWTR1     | 9,964371 | 4,82E-19 |
| SAMD4A    | 9,960849 | 2,01E-09 |
| NMU       | 9,960411 | 3,02E-09 |
| TBX2-AS1  | 9,942289 | 3,96E-09 |
| NCKAP5    | 9,934449 | 3,08E-09 |
| PCSK6     | 9,934409 | 1,08E-37 |
| C19orf33  | 9,931567 | 1,47E-10 |
| NAV2      | 9,913448 | 3,56E-09 |
| SMAD9     | 9,913277 | 8,03E-08 |
| NRP1      | 9,912312 | 1,68E-77 |
| PNPLA4    | 9,912202 | 3,18E-09 |
| CHST8     | 9,906542 | 3,24E-09 |
| CRIP2     | 9,894457 | 4,26E-64 |
| ZNF311    | 9,893708 | 1,55E-08 |
| CCL2      | 9,889241 | 1,69E-08 |
| HLA-DRB1  | 9,882708 | 1,20E-08 |
| RNF157    | 9,874439 | 4,06E-09 |
| CYP4F11   | 9,873256 | 1,09E-08 |

|           |          |           |
|-----------|----------|-----------|
| ARHGDIG   | 9,869457 | 1,42E-10  |
| GATA6     | 9,863909 | 6,30E-09  |
| ULK2      | 9,862734 | 7,66E-09  |
| BOK       | 9,856444 | 1,54E-10  |
| PARD6G    | 9,851041 | 4,50E-09  |
| P4HA2     | 9,848623 | 1,13E-17  |
| LYPD6     | 9,847104 | 4,60E-09  |
| PTGR1     | 9,840801 | 9,52E-09  |
| PPIC      | 9,83634  | 4,29E-40  |
| WLS       | 9,834077 | 8,10E-09  |
| GAD1      | 9,817353 | 2,82E-10  |
| APP       | 9,807836 | 2,03E-111 |
| MPP3      | 9,806672 | 5,97E-09  |
| SOWAHC    | 9,798947 | 1,04E-08  |
| CARD10    | 9,796063 | 7,52E-09  |
| SLC2A10   | 9,782149 | 7,90E-09  |
| PEX11A    | 9,781951 | 1,12E-08  |
| VIPR1     | 9,777978 | 4,33E-08  |
| TUBA3E    | 9,776343 | 1,25E-08  |
| ARHGEF28  | 9,768911 | 2,31E-10  |
| MAPK4     | 9,768153 | 9,29E-08  |
| PTGFRN    | 9,760393 | 1,11E-62  |
| EPHA10    | 9,754373 | 8,04E-09  |
| TRPV4     | 9,753706 | 1,19E-08  |
| GALNT11   | 9,751194 | 7,37E-18  |
| NFATC4    | 9,74593  | 9,43E-09  |
| LINC00960 | 9,745275 | 1,35E-08  |
| PCDHB6    | 9,742903 | 1,11E-08  |
| SPATA18   | 9,741312 | 1,28E-07  |
| ENPP5     | 9,732536 | 1,63E-08  |
| C10orf82  | 9,731967 | 1,47E-08  |
| EDA2R     | 9,725915 | 2,34E-08  |
| SPATA17   | 9,721145 | 2,96E-10  |
| MUC5B     | 9,720102 | 1,02E-08  |
| SEPT10    | 9,712052 | 3,54E-08  |
| FAXC      | 9,711466 | 1,09E-08  |
| SPINK5    | 9,710087 | 4,86E-08  |
| CBLC      | 9,704723 | 1,31E-08  |
| ICOSLG    | 9,702527 | 1,10E-08  |
| TYRP1     | 9,688178 | 1,28E-08  |
| MRAS      | 9,682314 | 1,66E-08  |
| ERC2      | 9,675398 | 1,28E-08  |
| LINC00963 | 9,670125 | 6,69E-10  |
| SLITRK4   | 9,662981 | 1,90E-08  |
| SLC47A1   | 9,661977 | 2,09E-08  |
| REPS2     | 9,656906 | 5,20E-08  |
| ALDH1L2   | 9,655257 | 9,17E-07  |
| PLEK2     | 9,654519 | 1,47E-08  |
| LIFR      | 9,645031 | 9,04E-10  |
| LSR       | 9,641215 | 1,35E-90  |

|           |          |           |
|-----------|----------|-----------|
| HMOX1     | 9,637589 | 1,40E-08  |
| EML1      | 9,637485 | 1,58E-25  |
| IRX4      | 9,635053 | 3,18E-08  |
| LURAP1L   | 9,63055  | 1,87E-08  |
| KRT15     | 9,612484 | 4,66E-07  |
| PRRG1     | 9,609441 | 1,00E-07  |
| PRSS22    | 9,602329 | 3,95E-08  |
| SYTL4     | 9,597391 | 4,13E-08  |
| OPHN1     | 9,596807 | 2,06E-08  |
| LDHD      | 9,595454 | 1,36E-07  |
| LINC01116 | 9,587397 | 2,20E-08  |
| TMPRSS2   | 9,585074 | 3,57E-08  |
| ACOT4     | 9,584223 | 2,86E-08  |
| HSBP1L1   | 9,581887 | 6,64E-10  |
| C1orf106  | 9,581141 | 4,13E-08  |
| KCNS3     | 9,575132 | 7,28E-08  |
| PLBD1     | 9,569223 | 3,79E-08  |
| SOX2      | 9,557764 | 7,09E-10  |
| FUT9      | 9,555039 | 2,62E-08  |
| RBPMS2    | 9,547515 | 2,90E-08  |
| TENM4     | 9,544322 | 5,00E-08  |
| DDX43     | 9,540774 | 3,72E-08  |
| GNG7      | 9,538906 | 5,10E-08  |
| GPR27     | 9,534525 | 3,62E-08  |
| TEAD3     | 9,534384 | 1,64E-30  |
| NAALADL2  | 9,523916 | 1,26E-09  |
| LPCAT2    | 9,515369 | 4,80E-08  |
| CYP24A1   | 9,514791 | 3,43E-08  |
| RBM24     | 9,512804 | 5,94E-08  |
| ARNTL     | 9,506426 | 6,86E-08  |
| NOV       | 9,505339 | 2,36E-06  |
| FAM43A    | 9,492867 | 1,23E-09  |
| TJP3      | 9,487876 | 7,65E-06  |
| CACNA1H   | 9,480785 | 1,94E-31  |
| KLF9      | 9,474374 | 1,56E-07  |
| C2orf54   | 9,473916 | 3,66E-07  |
| PLA2G4F   | 9,469557 | 1,55E-06  |
| ALDH3A1   | 9,468089 | 1,11E-06  |
| LOC100506 | 9,463473 | 8,74E-08  |
| MMP16     | 9,460583 | 6,72E-08  |
| NDST1     | 9,45496  | 4,94E-109 |
| PCDHA7    | 9,447899 | 4,99E-08  |
| PRPH      | 9,43801  | 7,49E-08  |
| ARHGEF34  | 9,43365  | 6,95E-08  |
| GPX2      | 9,428422 | 7,55E-06  |
| B3GNT4    | 9,424589 | 6,38E-08  |
| SYNPO     | 9,422672 | 1,99E-07  |
| HSPA12A   | 9,417816 | 7,01E-08  |
| ANKRD18A  | 9,403299 | 6,73E-08  |
| FGFR2     | 9,399125 | 6,63E-08  |

|           |          |           |
|-----------|----------|-----------|
| TC2N      | 9,397026 | 3,62E-33  |
| WISP2     | 9,39572  | 3,25E-06  |
| IL1R1     | 9,394927 | 7,53E-07  |
| LYPD6B    | 9,386527 | 7,52E-08  |
| TMEM117   | 9,376235 | 7,51E-08  |
| FCGR1A    | 9,372466 | 3,93E-07  |
| FAM83H    | 9,371955 | 7,22E-128 |
| OGFRL1    | 9,362567 | 2,34E-09  |
| LINC01123 | 9,355445 | 8,68E-08  |
| KCNMA1    | 9,351246 | 2,83E-07  |
| ID4       | 9,346262 | 5,24E-06  |
| CPT1C     | 9,34379  | 2,48E-07  |
| EYA2      | 9,342619 | 3,24E-07  |
| PRAME     | 9,337414 | 1,08E-08  |
| HOXC-AS3  | 9,334355 | 1,10E-07  |
| SYDE1     | 9,332786 | 1,04E-07  |
| ZNF860    | 9,331874 | 1,44E-07  |
| NUAK2     | 9,32493  | 1,10E-07  |
| LGR6      | 9,31986  | 1,57E-07  |
| FGF       | 9,314201 | 1,95E-05  |
| B3GALNT1  | 9,312075 | 5,38E-16  |
| RASD1     | 9,306441 | 3,81E-07  |
| COL4A5    | 9,297688 | 2,35E-07  |
| CDKN1A    | 9,288598 | 1,27E-12  |
| CNGB3     | 9,286705 | 1,66E-07  |
| INHA      | 9,286589 | 1,02E-05  |
| C1orf116  | 9,286441 | 2,91E-07  |
| SIM2      | 9,281174 | 1,44E-07  |
| GMPR      | 9,278086 | 5,30E-07  |
| FAM201A   | 9,277934 | 1,34E-07  |
| RIC3      | 9,26876  | 2,36E-07  |
| TGIF1     | 9,265305 | 9,22E-40  |
| TMC7      | 9,259301 | 1,72E-07  |
| TMEM45B   | 9,254503 | 5,63E-16  |
| SHH       | 9,250075 | 2,35E-07  |
| OSBPL10   | 9,245801 | 8,74E-30  |
| CLDN7     | 9,244643 | 1,56E-14  |
| PCDHB4    | 9,239217 | 6,59E-07  |
| RASSF10   | 9,237769 | 2,67E-07  |
| EFEMP1    | 9,227512 | 2,19E-58  |
| FSTL4     | 9,225357 | 3,06E-07  |
| ZNF703    | 9,214068 | 1,90E-155 |
| DNAH3     | 9,209748 | 2,75E-07  |
| NIPAL1    | 9,209748 | 2,75E-07  |
| PROM2     | 9,204316 | 3,63E-51  |
| MYRIP     | 9,203601 | 1,00E-08  |
| SLC25A43  | 9,199208 | 6,42E-29  |
| PPP2R3A   | 9,19829  | 9,63E-22  |
| SHROOM2   | 9,198085 | 2,22E-07  |
| NRG3      | 9,197784 | 3,31E-07  |

|            |          |           |
|------------|----------|-----------|
| EFNA5      | 9,192112 | 5,32E-09  |
| UNC5B      | 9,191521 | 9,54E-08  |
| PCAT7      | 9,187055 | 2,26E-07  |
| TUB        | 9,180463 | 2,35E-07  |
| L1CAM      | 9,179532 | 5,32E-21  |
| THBD       | 9,174525 | 2,94E-07  |
| CDC42BPB   | 9,173263 | 1,65E-110 |
| CHGA       | 9,162987 | 6,29E-09  |
| TNFRSF11A  | 9,162612 | 2,89E-07  |
| C1orf210   | 9,150645 | 4,61E-07  |
| MMP17      | 9,145194 | 1,63E-15  |
| FZD9       | 9,14488  | 4,06E-07  |
| COL6A1     | 9,140321 | 1,15E-15  |
| AIM1L      | 9,13782  | 5,51E-07  |
| GSG1L      | 9,135606 | 3,28E-07  |
| TRPV3      | 9,13382  | 3,07E-07  |
| PGM5       | 9,120861 | 4,74E-07  |
| ADAMTS9    | 9,119237 | 2,07E-06  |
| IGSF5      | 9,117577 | 3,91E-07  |
| PRR34-AS1  | 9,116898 | 6,38E-07  |
| ABCA12     | 9,111465 | 8,58E-26  |
| RAB31      | 9,110813 | 2,35E-08  |
| FAM110C    | 9,109723 | 1,56E-06  |
| MARC2      | 9,107719 | 3,81E-07  |
| CLDN23     | 9,096712 | 3,79E-07  |
| COL6A2     | 9,093521 | 9,60E-09  |
| SOWAHB     | 9,083742 | 4,89E-07  |
| GRIK3      | 9,078372 | 1,76E-06  |
| TEKT4P2    | 9,075179 | 4,27E-07  |
| FEZ1       | 9,07365  | 6,25E-07  |
| MAOB       | 9,063665 | 1,49E-06  |
| SP6        | 9,062704 | 2,06E-08  |
| HOXC13-AS1 | 9,060495 | 6,07E-07  |
| RPRM       | 9,054175 | 1,23E-06  |
| HTR2C      | 9,043409 | 5,29E-07  |
| LHX1       | 9,037292 | 6,16E-07  |
| S100A9     | 9,036367 | 6,64E-05  |
| AGR2       | 9,035703 | 7,51E-06  |
| INTU       | 9,023778 | 5,71E-07  |
| HOXA4      | 9,016694 | 1,40E-06  |
| NHLRC1     | 9,015111 | 1,69E-06  |
| RADIL      | 9,013523 | 2,07E-06  |
| KIAA1522   | 9,010672 | 4,59E-108 |
| CNNM1      | 9,008189 | 6,24E-07  |
| PCDHA5     | 9,00544  | 6,61E-07  |
| PCDHB3     | 9,001015 | 6,24E-21  |
| DLC1       | 8,997454 | 6,94E-15  |
| CALCR      | 8,994436 | 9,35E-07  |
| FBXO16     | 8,991252 | 7,89E-07  |
| LOC100286  | 8,991252 | 7,89E-07  |

|            |          |           |
|------------|----------|-----------|
| SNCAIP     | 8,986079 | 7,09E-07  |
| DFNB31     | 8,985552 | 1,41E-14  |
| KCNV1      | 8,978609 | 2,07E-06  |
| PLA2G3     | 8,975903 | 4,09E-06  |
| FOS        | 8,965947 | 1,96E-05  |
| CYR61      | 8,96308  | 0,000387  |
| LCN2       | 8,957774 | 3,62E-06  |
| JAM2       | 8,950815 | 3,96E-06  |
| CAV2       | 8,942861 | 9,46E-07  |
| LINC01270  | 8,941994 | 1,35E-05  |
| TMPRSS4    | 8,940438 | 1,38E-06  |
| CDC42EP5   | 8,940405 | 9,35E-07  |
| PPARG      | 8,939611 | 1,31E-06  |
| PRODH      | 8,931906 | 6,48E-05  |
| SLC30A3    | 8,93012  | 1,25E-06  |
| VEPH1      | 8,927401 | 5,08E-06  |
| TPTE       | 8,924286 | 1,15E-06  |
| FZD4       | 8,917265 | 1,72E-06  |
| XK         | 8,917212 | 1,15E-06  |
| ZCCHC12    | 8,91304  | 1,07E-06  |
| MYO6       | 8,912772 | 4,10E-90  |
| LOC644915  | 8,912169 | 1,58E-06  |
| FTCDNL1    | 8,908853 | 1,14E-06  |
| CD24       | 8,905695 | 1,21E-138 |
| DSCAM      | 8,89586  | 2,63E-06  |
| ZNF112     | 8,886438 | 1,39E-06  |
| HSD11B2    | 8,88442  | 3,54E-08  |
| A4GALT     | 8,878141 | 4,96E-06  |
| STMND1     | 8,876595 | 1,39E-06  |
| PPAP2C     | 8,876382 | 1,69E-20  |
| SLC25A21-1 | 8,871538 | 1,39E-05  |
| PRICKLE2-1 | 8,867539 | 1,52E-06  |
| FAM86B1    | 8,856665 | 5,71E-08  |
| TACC2      | 8,856308 | 1,01E-06  |
| SEMA3D     | 8,855277 | 4,29E-06  |
| CLIC3      | 8,853699 | 2,08E-06  |
| ADCY6      | 8,852147 | 7,62E-26  |
| KRT23      | 8,847978 | 1,54E-06  |
| FRMPD1     | 8,840943 | 1,86E-06  |
| PCDHA13    | 8,83346  | 1,74E-06  |
| CCDC83     | 8,83172  | 2,47E-06  |
| KCNN2      | 8,828581 | 1,72E-06  |
| PCOLCE2    | 8,825478 | 1,85E-06  |
| ARPIN      | 8,823681 | 2,05E-06  |
| LHX2       | 8,820543 | 2,49E-06  |
| MUC3A      | 8,812944 | 2,42E-06  |
| C4orf19    | 8,810284 | 2,19E-06  |
| TRIP6      | 8,808076 | 8,46E-113 |
| AK4        | 8,805051 | 6,64E-38  |
| MTMR7      | 8,796727 | 2,06E-06  |

|           |          |           |
|-----------|----------|-----------|
| TRNP1     | 8,791723 | 2,18E-06  |
| PARD3B    | 8,79041  | 5,34E-08  |
| PDGFB     | 8,766109 | 6,36E-14  |
| LOC100134 | 8,764622 | 2,69E-06  |
| EPN2      | 8,762468 | 4,28E-26  |
| ZNF503-AS | 8,757654 | 3,08E-06  |
| EPS8      | 8,75075  | 3,70E-42  |
| KIF5C     | 8,750186 | 3,53E-06  |
| LOC728735 | 8,744518 | 3,03E-06  |
| CARD14    | 8,743156 | 4,25E-06  |
| WDFY3-AS1 | 8,740783 | 3,67E-06  |
| KRT17     | 8,736977 | 3,07E-07  |
| HOXB9     | 8,729938 | 4,67E-05  |
| GFPT2     | 8,716988 | 3,31E-06  |
| FAM81B    | 8,712684 | 4,23E-06  |
| SERPINA1  | 8,708816 | 3,60E-06  |
| MEST      | 8,707189 | 8,11E-104 |
| LOC90768  | 8,706867 | 3,81E-06  |
| FCHO2     | 8,706084 | 7,48E-08  |
| MBP       | 8,704926 | 4,24E-06  |
| TFAP2A-AS | 8,69864  | 3,80E-06  |
| EFNA2     | 8,693295 | 3,59E-06  |
| SCIN      | 8,689954 | 7,42E-06  |
| ZIC4      | 8,686948 | 3,76E-06  |
| HOXC5     | 8,684344 | 1,25E-05  |
| IGF1      | 8,680069 | 4,14E-06  |
| PDZRN3    | 8,673666 | 4,00E-06  |
| PTPRO     | 8,673197 | 2,41E-13  |
| VAX2      | 8,672196 | 4,67E-06  |
| PCDH19    | 8,669773 | 7,63E-06  |
| KRT80     | 8,666322 | 6,28E-74  |
| HOTAIR    | 8,662255 | 4,39E-06  |
| CERS1     | 8,656126 | 1,38E-05  |
| SGPP2     | 8,655797 | 6,00E-06  |
| LINC01006 | 8,651254 | 4,82E-06  |
| FANK1     | 8,64895  | 2,15E-05  |
| ANK1      | 8,646109 | 6,46E-05  |
| SNAP25    | 8,644236 | 5,79E-06  |
| PDGFRL    | 8,644236 | 5,79E-06  |
| EPHA4     | 8,641264 | 9,62E-06  |
| FAM20C    | 8,632669 | 3,01E-13  |
| C5AR2     | 8,632282 | 3,69E-12  |
| SYBU      | 8,623389 | 2,01E-07  |
| C16orf45  | 8,621353 | 5,76E-06  |
| EGR2      | 8,616319 | 7,94E-05  |
| PPP1R26-A | 8,610457 | 1,23E-05  |
| RAI2      | 8,598675 | 9,91E-06  |
| SLC41A2   | 8,593204 | 1,39E-07  |
| GRB14     | 8,589022 | 3,26E-19  |
| CYB561    | 8,584943 | 3,66E-78  |

|           |          |          |
|-----------|----------|----------|
| LAMB2     | 8,583275 | 2,03E-38 |
| CEBPA-AS1 | 8,582337 | 1,18E-05 |
| SHC2      | 8,579669 | 1,51E-05 |
| TTC29     | 8,579243 | 6,90E-06 |
| TOM1L1    | 8,565347 | 1,34E-05 |
| PDGFC     | 8,565209 | 7,38E-07 |
| FAM131C   | 8,563859 | 7,25E-06 |
| LNX1      | 8,560405 | 5,36E-05 |
| GSTO2     | 8,558007 | 3,92E-24 |
| HLA-DRB5  | 8,555878 | 1,12E-05 |
| SPATA6    | 8,552025 | 1,31E-05 |
| FBXL2     | 8,549399 | 8,39E-06 |
| PAX2      | 8,544433 | 0,000147 |
| SLC22A11  | 8,544158 | 2,81E-05 |
| ASCL5     | 8,543456 | 8,03E-06 |
| IFNLR1    | 8,542915 | 8,08E-06 |
| BMP8B     | 8,541831 | 8,24E-06 |
| PVALB     | 8,540857 | 2,02E-05 |
| XKRX      | 8,537012 | 1,47E-05 |
| NMUR2     | 8,536412 | 8,49E-06 |
| RMDN2     | 8,531509 | 8,67E-06 |
| MPP2      | 8,5301   | 4,01E-07 |
| FAM95C    | 8,527147 | 9,17E-06 |
| ESRP1     | 8,525894 | 2,00E-14 |
| TCHHL1    | 8,525487 | 0,000308 |
| GUCY1B2   | 8,525365 | 2,54E-05 |
| KIAA1324  | 8,516142 | 2,18E-26 |
| BMP2      | 8,507046 | 1,19E-32 |
| CRIM1     | 8,502482 | 2,53E-07 |
| MATK      | 8,502236 | 2,43E-65 |
| SOX18     | 8,500091 | 1,02E-05 |
| KCNQ1OT1  | 8,487938 | 6,01E-07 |
| SNAR-E    | 8,485441 | 2,33E-05 |
| GATA5     | 8,484959 | 1,21E-05 |
| ARHGEF16  | 8,481703 | 6,57E-28 |
| STOX2     | 8,47876  | 1,13E-05 |
| CREB5     | 8,471553 | 0,00015  |
| IGFL1     | 8,469042 | 0,000304 |
| LRRK2     | 8,468004 | 1,64E-05 |
| GJA1      | 8,467182 | 5,58E-05 |
| WIF1      | 8,466014 | 6,50E-05 |
| NECAB2    | 8,462737 | 2,81E-05 |
| SERPINA3  | 8,462346 | 2,52E-05 |
| NODAL     | 8,459452 | 2,04E-05 |
| RIPPLY3   | 8,453078 | 1,37E-05 |
| LOC102723 | 8,451924 | 1,43E-05 |
| PLEKHG6   | 8,45025  | 9,55E-12 |
| CD101     | 8,443863 | 1,70E-05 |
| CRABP2    | 8,439823 | 5,32E-64 |
| SLC6A14   | 8,439788 | 1,48E-05 |



|           |          |           |
|-----------|----------|-----------|
| RIN2      | 8,43575  | 2,14E-05  |
| MAP2      | 8,433039 | 3,76E-07  |
| CLCA2     | 8,430824 | 0,000162  |
| SHISA4    | 8,428787 | 3,12E-05  |
| LOC100233 | 8,420033 | 3,00E-07  |
| MUCL1     | 8,411241 | 1,63E-05  |
| FAM196A   | 8,408787 | 4,61E-05  |
| NOL3      | 8,408406 | 2,24E-37  |
| UPK3B     | 8,401734 | 7,99E-05  |
| HOXD12    | 8,38729  | 6,33E-05  |
| GPR37L1   | 8,384722 | 2,17E-05  |
| LOX       | 8,383492 | 2,02E-05  |
| JPH3      | 8,379678 | 3,47E-07  |
| SMPDL3A   | 8,378098 | 2,98E-05  |
| HOXA5     | 8,376797 | 2,87E-05  |
| FOXA2     | 8,376231 | 1,94E-05  |
| HS6ST3    | 8,370135 | 2,28E-05  |
| MAPK15    | 8,360264 | 4,41E-05  |
| DNAH5     | 8,35912  | 2,34E-05  |
| F7        | 8,355261 | 7,33E-05  |
| NELL2     | 8,352928 | 3,26E-05  |
| GRB7      | 8,352306 | 3,40E-05  |
| RHPN2     | 8,352034 | 4,91E-22  |
| LINC01124 | 8,341158 | 3,40E-05  |
| PAH       | 8,33748  | 2,86E-05  |
| HLA-F     | 8,333804 | 5,01E-05  |
| SLC52A3   | 8,329374 | 3,69E-05  |
| DNAJC22   | 8,329009 | 4,44E-07  |
| LRRK1     | 8,326845 | 3,24E-05  |
| HOXC6     | 8,32495  | 3,00E-05  |
| ALDH3B2   | 8,311479 | 0,000107  |
| STOM      | 8,308738 | 3,78E-26  |
| TBC1D8B   | 8,307921 | 5,20E-05  |
| AMBP      | 8,304242 | 0,000126  |
| MAMLD1    | 8,303715 | 1,12E-06  |
| LOC389834 | 8,302399 | 5,05E-07  |
| SERPINH1  | 8,297632 | 2,42E-173 |
| EPHB4     | 8,294463 | 1,08E-186 |
| ESRP2     | 8,289146 | 3,74E-60  |
| PART1     | 8,287342 | 3,58E-05  |
| SHTN1     | 8,286086 | 4,16E-73  |
| NKX6-1    | 8,284728 | 3,50E-05  |
| ADAP2     | 8,284099 | 3,27E-05  |
| NCAM2     | 8,282747 | 1,93E-20  |
| DNM1P35   | 8,277144 | 0,000118  |
| DGCR5     | 8,272384 | 3,68E-05  |
| NACC2     | 8,258752 | 8,57E-05  |
| SLC1A3    | 8,256653 | 3,61E-05  |
| TRPM4     | 8,256062 | 1,98E-36  |
| NPAS3     | 8,253297 | 5,55E-05  |

|          |          |          |
|----------|----------|----------|
| CCDC110  | 8,250622 | 6,76E-05 |
| ACTG2    | 8,247106 | 5,17E-06 |
| WFDC2    | 8,242793 | 6,52E-05 |
| GPR39    | 8,23943  | 5,37E-05 |
| MIR4458H | 8,233382 | 4,30E-05 |
| SEMA4C   | 8,226937 | 3,78E-66 |
| FOXI3    | 8,220589 | 4,63E-05 |
| RHOV     | 8,216209 | 2,76E-21 |
| MANSC4   | 8,215138 | 2,36E-05 |
| POU6F2   | 8,20766  | 5,07E-05 |
| SHANK2   | 8,20514  | 4,93E-06 |
| GRID1    | 8,204916 | 5,72E-05 |
| KCNN1    | 8,202949 | 7,86E-05 |
| CPLX2    | 8,199681 | 0,0002   |
| ANKS1B   | 8,199391 | 8,09E-05 |
| AMOTL2   | 8,198659 | 1,25E-39 |
| COLCA1   | 8,195348 | 5,49E-05 |
| HOXA6    | 8,183055 | 0,000157 |
| CDH18    | 8,179399 | 6,15E-05 |
| GHR      | 8,17733  | 5,36E-05 |
| MARVELD2 | 8,171575 | 3,24E-35 |
| PRDM6    | 8,156443 | 1,20E-06 |
| NOXA1    | 8,154725 | 0,000139 |
| KCNJ3    | 8,145379 | 1,68E-06 |
| ZP3      | 8,144747 | 0,000118 |
| ADAM32   | 8,141215 | 0,000146 |
| RNF180   | 8,134854 | 8,93E-05 |
| SLIT2    | 8,133456 | 6,50E-05 |
| ZFH3     | 8,127191 | 1,83E-84 |
| TGFB1    | 8,125667 | 0,000176 |
| CLDN9    | 8,118336 | 0,000106 |
| NFIA     | 8,117538 | 6,17E-20 |
| SEMA6A   | 8,114238 | 2,45E-11 |
| SLC52A1  | 8,111883 | 0,000195 |
| MGC32805 | 8,111142 | 0,000184 |
| TUBA3D   | 8,10476  | 2,35E-06 |
| KRT16    | 8,098716 | 0,000233 |
| PDE2A    | 8,086626 | 0,000164 |
| RAB6B    | 8,081451 | 2,03E-06 |
| TBC1D30  | 8,080921 | 3,20E-69 |
| GULP1    | 8,080781 | 8,87E-05 |
| KIF26B   | 8,080034 | 8,77E-05 |
| RIBC2    | 8,07981  | 0,00031  |
| LPPR3    | 8,079047 | 0,000339 |
| RIMS4    | 8,076834 | 3,37E-14 |
| TH       | 8,074848 | 0,000129 |
| NYNRIN   | 8,068065 | 2,62E-08 |
| ADAMTS7  | 8,067639 | 5,65E-10 |
| LIMCH1   | 8,064377 | 0,000179 |
| ADAMTSL3 | 8,064253 | 0,000121 |

|           |          |          |
|-----------|----------|----------|
| SNCB      | 8,059268 | 0,000455 |
| CCDC40    | 8,055846 | 0,000216 |
| CCDC3     | 8,051422 | 0,000103 |
| TMEM105   | 8,045367 | 0,00015  |
| LOC100270 | 8,044597 | 0,000144 |
| GFRA1     | 8,032619 | 1,02E-46 |
| SAMHD1    | 8,030861 | 7,21E-10 |
| SASH1     | 8,025341 | 0,00013  |
| EMCN      | 8,023008 | 0,000122 |
| PDZD4     | 8,021273 | 9,63E-11 |
| PCDHAC1   | 8,017631 | 0,000198 |
| EWSAT1    | 8,015935 | 0,000186 |
| CKMT1B    | 8,015226 | 9,29E-06 |
| HOPX      | 8,009938 | 0,000376 |
| GSC       | 8,0088   | 0,000328 |
| KCNF1     | 8,007382 | 0,00014  |
| BOC       | 8,004265 | 0,000124 |
| PKD1L2    | 8,000326 | 0,000123 |
| SFN       | 7,995855 | 3,45E-60 |
| GOLGA7B   | 7,994768 | 2,19E-12 |
| PRKAG2    | 7,988609 | 1,20E-26 |
| NXPH3     | 7,98373  | 0,000194 |
| ZDHHC1    | 7,979715 | 0,000164 |
| GNAS-AS1  | 7,973289 | 0,000143 |
| ACCS      | 7,970005 | 0,000228 |
| KRTAP4-1  | 7,96851  | 0,000213 |
| KCNU1     | 7,963609 | 0,000159 |
| MARCH1    | 7,959274 | 4,33E-06 |
| CALB2     | 7,957237 | 0,000298 |
| LOC730102 | 7,945065 | 0,000423 |
| BCAM      | 7,938679 | 1,82E-59 |
| EGR1      | 7,936272 | 2,11E-07 |
| CYP4F22   | 7,932598 | 0,000208 |
| BACE2     | 7,930568 | 1,30E-47 |
| CCSER1    | 7,928417 | 0,000207 |
| CALML5    | 7,921022 | 0,000273 |
| SGCG      | 7,918348 | 0,000376 |
| GJB5      | 7,916192 | 0,000678 |
| ADORA1    | 7,913467 | 0,000206 |
| NRK       | 7,91278  | 0,000498 |
| PRKD1     | 7,910912 | 0,000236 |
| TLX1NB    | 7,904218 | 0,000193 |
| HOXC9     | 7,895782 | 0,000216 |
| NRCAM     | 7,885644 | 8,37E-26 |
| OLFML3    | 7,882212 | 4,66E-05 |
| CD36      | 7,873658 | 0,000388 |
| HOXA1     | 7,871919 | 0,000353 |
| NDNF      | 7,870992 | 0,000225 |
| CLDN1     | 7,867622 | 5,96E-05 |
| TTC6      | 7,865802 | 0,000249 |

|           |          |           |
|-----------|----------|-----------|
| KLB       | 7,865802 | 0,000249  |
| IER5L     | 7,865423 | 8,43E-08  |
| SSPN      | 7,864097 | 0,000261  |
| C8orf48   | 7,863228 | 0,000256  |
| LOC101925 | 7,862325 | 0,000281  |
| ARHGEF38  | 7,861453 | 0,000292  |
| TNS3      | 7,853323 | 6,67E-14  |
| KIF12     | 7,851028 | 0,000255  |
| SCNN1A    | 7,842193 | 5,68E-08  |
| NR2F1-AS1 | 7,841392 | 0,000259  |
| TGFA      | 7,836938 | 1,86E-09  |
| DEFB126   | 7,836099 | 0,000265  |
| LOC441666 | 7,830813 | 0,000312  |
| DHX32     | 7,829272 | 7,50E-43  |
| RHBDF2    | 7,819571 | 3,12E-40  |
| SNAR-G1   | 7,814779 | 0,000351  |
| OXGR1     | 7,809334 | 0,000377  |
| SPINT1    | 7,807703 | 6,95E-101 |
| CDC42EP4  | 7,805983 | 6,39E-05  |
| THRB      | 7,803961 | 0,000301  |
| HOXA11    | 7,797447 | 0,000824  |
| KDR       | 7,794008 | 0,000349  |
| TM4SF1    | 7,793096 | 0,000342  |
| NPTX1     | 7,789564 | 0,000673  |
| SEL1L3    | 7,787998 | 0,000459  |
| LINC00992 | 7,787687 | 7,25E-06  |
| CELF3     | 7,782172 | 0,000454  |
| FRK       | 7,772142 | 0,000758  |
| MAP3K13   | 7,766907 | 3,85E-20  |
| FZD3      | 7,753876 | 2,70E-28  |
| NKILA     | 7,746868 | 0,000393  |
| WNT9A     | 7,745976 | 0,000534  |
| IBSP      | 7,745927 | 0,000399  |
| TNFRSF12A | 7,737806 | 8,97E-46  |
| ZNF204P   | 7,735734 | 8,95E-06  |
| COL26A1   | 7,735693 | 0,000899  |
| SLC5A5    | 7,73281  | 0,000754  |
| GRID2IP   | 7,732714 | 0,00041   |
| SLCO5A1   | 7,723217 | 0,000501  |
| FOXP2     | 7,716344 | 1,30E-05  |
| CEACAM5   | 7,714683 | 0,000842  |
| DAPK2     | 7,702009 | 0,000568  |
| SETBP1    | 7,696138 | 0,000756  |
| NAP1L2    | 7,693368 | 0,000802  |
| C19orf45  | 7,693289 | 0,000486  |
| CNTNAP3   | 7,690358 | 0,000503  |
| ZNF516    | 7,689317 | 7,96E-23  |
| PLIN5     | 7,684507 | 0,000575  |
| CA4       | 7,683483 | 0,000606  |
| GSN       | 7,681015 | 0,000312  |

|           |          |           |
|-----------|----------|-----------|
| SYCP2     | 7,675543 | 0,000898  |
| CACNA1I   | 7,675543 | 0,000898  |
| LFNG      | 7,672021 | 3,33E-16  |
| SAMD12-A  | 7,665753 | 0,000633  |
| CACNA1D   | 7,663389 | 3,69E-17  |
| TDRD5     | 7,655623 | 7,79E-13  |
| TRIO      | 7,649953 | 3,13E-63  |
| TUFT1     | 7,649351 | 2,38E-45  |
| LMNA      | 7,644569 | 1,27E-90  |
| RASGEF1A  | 7,641693 | 4,94E-22  |
| HAP1      | 7,633651 | 0,000966  |
| HOXC4     | 7,629503 | 0,00068   |
| SEMA3F    | 7,626931 | 1,42E-50  |
| COL3A1    | 7,611104 | 0,000945  |
| ARHGEF17  | 7,597573 | 3,48E-22  |
| SIX1      | 7,593567 | 9,37E-20  |
| C8orf46   | 7,591308 | 0,000772  |
| SYNE4     | 7,581167 | 9,93E-44  |
| MIR4664   | 7,576593 | 0,000794  |
| RNF207    | 7,575535 | 0,000796  |
| FGF12     | 7,56619  | 2,65E-15  |
| NGFR      | 7,562799 | 0,000913  |
| STBD1     | 7,561729 | 0,000898  |
| CXCL12    | 7,560836 | 2,06E-09  |
| ZNF793-AS | 7,556371 | 0,000863  |
| ANKDD1B   | 7,548839 | 0,000933  |
| LHX6      | 7,548839 | 0,000933  |
| CDC14B    | 7,544706 | 1,47E-12  |
| TMEM150C  | 7,537981 | 0,000228  |
| RHOBTB1   | 7,537732 | 5,00E-163 |
| SERPINB5  | 7,521011 | 0,000168  |
| CDK14     | 7,515214 | 3,28E-05  |
| TLCD1     | 7,510149 | 2,30E-52  |
| TNFAIP8L3 | 7,500546 | 1,82E-24  |
| LOC28333E | 7,489581 | 6,93E-20  |
| FLT4      | 7,488181 | 6,12E-05  |
| ADGRB1    | 7,486807 | 0,000102  |
| ELOVL7    | 7,47681  | 0,00054   |
| MALRD1    | 7,47604  | 2,96E-08  |
| RNF43     | 7,457199 | 2,16E-113 |
| NTN4      | 7,456175 | 3,86E-05  |
| GSTM3     | 7,455986 | 2,32E-31  |
| TSPAN12   | 7,451261 | 5,83E-12  |
| DENND5A   | 7,443239 | 0,000192  |
| WWC1      | 7,437486 | 1,48E-68  |
| CXCL16    | 7,435329 | 1,43E-20  |
| RIPK4     | 7,42293  | 4,15E-12  |
| MARK1     | 7,416309 | 0,000164  |
| ATXN1     | 7,409406 | 2,81E-18  |
| RND3      | 7,408705 | 2,54E-38  |

|           |          |           |
|-----------|----------|-----------|
| GUCY1A3   | 7,402359 | 1,63E-19  |
| BCAS4     | 7,400253 | 5,32E-21  |
| SELM      | 7,395917 | 3,89E-05  |
| MYO10     | 7,395312 | 1,52E-59  |
| PCSK9     | 7,392746 | 2,69E-07  |
| LENG9     | 7,388493 | 3,38E-28  |
| LMX1B     | 7,388031 | 3,86E-15  |
| CABYR     | 7,37879  | 2,15E-13  |
| PRTG      | 7,370904 | 4,39E-05  |
| SLC6A8    | 7,352812 | 4,39E-27  |
| PRRG4     | 7,319279 | 8,00E-05  |
| ID1       | 7,30414  | 3,65E-53  |
| C1QTNF9B  | 7,303048 | 2,06E-16  |
| NUP210L   | 7,302089 | 2,68E-19  |
| TTC39A    | 7,280854 | 2,47E-20  |
| DHRS2     | 7,277364 | 8,37E-29  |
| GPAT3     | 7,271041 | 2,35E-07  |
| SCN4A     | 7,258994 | 2,42E-13  |
| FKBP9     | 7,245274 | 1,13E-96  |
| STARD10   | 7,220011 | 5,20E-76  |
| C16orf74  | 7,219817 | 2,55E-08  |
| RAB20     | 7,212022 | 5,06E-07  |
| RTN1      | 7,200173 | 0,000109  |
| TLCD2     | 7,195037 | 7,75E-14  |
| WNT6      | 7,190415 | 9,42E-05  |
| LOXL3     | 7,189319 | 4,44E-15  |
| ATP8B1    | 7,185617 | 1,52E-48  |
| POU3F3    | 7,154774 | 2,91E-07  |
| F2RL1     | 7,151771 | 6,60E-13  |
| NRARP     | 7,144869 | 1,45E-24  |
| CEBPA     | 7,141171 | 1,58E-24  |
| SLC9A3R2  | 7,120234 | 1,11E-70  |
| TPBG      | 7,118258 | 3,49E-82  |
| COL16A1   | 7,100097 | 0,000184  |
| CDYL2     | 7,095874 | 2,03E-13  |
| CKMT1A    | 7,084098 | 7,43E-29  |
| ZBTB7B    | 7,084083 | 1,23E-100 |
| APBB2     | 7,0813   | 4,75E-31  |
| SH3BGR2   | 7,072847 | 5,60E-12  |
| SEMA3B    | 7,059212 | 0,000184  |
| CMBL      | 7,055353 | 5,33E-31  |
| VPS37D    | 7,045693 | 5,28E-07  |
| CRISPLD2  | 7,018965 | 8,13E-16  |
| KLRG2     | 7,01024  | 1,67E-07  |
| RAMP1     | 7,001266 | 0,000258  |
| METRNL    | 6,999214 | 5,08E-33  |
| CD9       | 6,999183 | 3,98E-103 |
| C17orf104 | 6,988694 | 2,66E-06  |
| LONRF2    | 6,982516 | 4,75E-21  |
| TNNT1     | 6,979775 | 6,05E-101 |

|          |          |           |
|----------|----------|-----------|
| EPB41L1  | 6,977228 | 6,54E-65  |
| YAP1     | 6,960978 | 1,12E-38  |
| ENTPD1   | 6,95014  | 9,10E-16  |
| KSR2     | 6,946923 | 7,24E-10  |
| KIAA1217 | 6,942007 | 1,83E-27  |
| ASCL4    | 6,916132 | 2,54E-20  |
| SIRPA    | 6,913195 | 6,04E-07  |
| TBC1D9   | 6,910064 | 4,39E-87  |
| PKIB     | 6,884629 | 1,12E-64  |
| PHLDA3   | 6,884185 | 3,26E-28  |
| PHLDA1   | 6,879018 | 3,83E-47  |
| KDELR3   | 6,876037 | 1,40E-15  |
| MACC1    | 6,865558 | 2,38E-08  |
| TRIL     | 6,856845 | 0,000494  |
| HBA1     | 6,849316 | 1,58E-06  |
| RPP25    | 6,846583 | 1,12E-50  |
| LGALS3   | 6,823482 | 2,73E-10  |
| HMCN1    | 6,816422 | 0,000423  |
| GAS2L3   | 6,811516 | 7,49E-43  |
| FHDC1    | 6,797715 | 1,43E-18  |
| SPATA20  | 6,782822 | 3,32E-54  |
| HID1     | 6,782585 | 1,46E-53  |
| JUP      | 6,77629  | 3,39E-65  |
| PCDHB2   | 6,766082 | 3,51E-27  |
| SCML1    | 6,762626 | 2,92E-13  |
| CCDC122  | 6,761286 | 3,07E-17  |
| LRRC73   | 6,760096 | 9,36E-09  |
| LATS2    | 6,750773 | 5,03E-18  |
| SEMA6B   | 6,745008 | 6,97E-19  |
| MSRB3    | 6,743805 | 0,000585  |
| EPCAM    | 6,73978  | 5,53E-161 |
| ARVCF    | 6,733789 | 5,30E-37  |
| CRABP1   | 6,730786 | 9,04E-06  |
| ZFP2     | 6,724162 | 0,000909  |
| LACC1    | 6,714883 | 2,06E-09  |
| SLC8A1   | 6,712639 | 2,14E-12  |
| IL17RB   | 6,707815 | 3,58E-10  |
| PVRL2    | 6,706077 | 2,32E-58  |
| B4GALNT4 | 6,695691 | 5,23E-29  |
| SLC4A3   | 6,692303 | 3,03E-06  |
| FBXO44   | 6,688162 | 8,39E-17  |
| NAT8L    | 6,677343 | 2,17E-34  |
| FBXO17   | 6,677318 | 5,97E-27  |
| TNFRSF18 | 6,675123 | 3,44E-05  |
| AMZ1     | 6,671113 | 8,02E-06  |
| NIPAL2   | 6,663191 | 4,19E-17  |
| RAI14    | 6,661359 | 6,31E-24  |
| COBL     | 6,655265 | 7,16E-23  |
| CAMSAP2  | 6,653902 | 2,45E-84  |
| TMEM163  | 6,647421 | 5,98E-06  |

|           |          |          |
|-----------|----------|----------|
| SYT7      | 6,644507 | 1,26E-91 |
| MUC1      | 6,615409 | 2,77E-31 |
| LAMA3     | 6,615188 | 7,87E-16 |
| DRAM1     | 6,585507 | 5,64E-21 |
| GPSM1     | 6,575564 | 1,97E-34 |
| F12       | 6,565561 | 2,78E-87 |
| PLOD1     | 6,555994 | 5,27E-65 |
| SH3BP4    | 6,554959 | 2,42E-50 |
| GLIS2     | 6,550655 | 1,05E-25 |
| SH3PXD2B  | 6,550199 | 6,28E-37 |
| FLVCR2    | 6,528785 | 5,65E-10 |
| S100P     | 6,514162 | 9,83E-06 |
| IL17RD    | 6,512224 | 2,88E-15 |
| ACE       | 6,510111 | 1,88E-05 |
| MAFB      | 6,508823 | 1,27E-23 |
| CEBPD     | 6,49057  | 3,65E-15 |
| CIART     | 6,473362 | 9,46E-28 |
| MAP3K5    | 6,469615 | 8,05E-07 |
| PC        | 6,462552 | 8,80E-05 |
| MYO5C     | 6,460699 | 1,63E-85 |
| RIPK2     | 6,455259 | 3,41E-72 |
| ZFYVE28   | 6,450405 | 7,16E-15 |
| SLC35D2   | 6,446034 | 1,72E-18 |
| PCDHA12   | 6,445333 | 1,65E-11 |
| NRXN3     | 6,436383 | 1,10E-09 |
| GPNMB     | 6,434627 | 3,15E-22 |
| AHNAK2    | 6,433655 | 1,34E-14 |
| LGALSL    | 6,430943 | 6,82E-15 |
| AHNAK     | 6,430734 | 1,11E-78 |
| DUSP8     | 6,427596 | 2,52E-20 |
| UST       | 6,425901 | 5,46E-11 |
| CHST15    | 6,401798 | 5,98E-59 |
| PREX1     | 6,390321 | 1,76E-70 |
| ERBB2     | 6,359575 | 3,20E-40 |
| FOXC1     | 6,357343 | 2,89E-19 |
| CTSF      | 6,345889 | 2,15E-09 |
| DEPTOR    | 6,342537 | 1,15E-06 |
| RDH16     | 6,338374 | 2,35E-21 |
| KIAA1324L | 6,337934 | 9,28E-50 |
| GALNT14   | 6,33013  | 7,07E-23 |
| TMPRSS13  | 6,326284 | 1,32E-19 |
| FAM171B   | 6,321828 | 5,21E-33 |
| LARP6     | 6,310799 | 3,20E-10 |
| TIMP3     | 6,292722 | 4,52E-09 |
| ABLIM3    | 6,291073 | 4,67E-05 |
| SORBS1    | 6,290603 | 3,91E-05 |
| MPZL2     | 6,289825 | 3,55E-14 |
| SESN3     | 6,282493 | 3,33E-16 |
| SMAD7     | 6,280564 | 6,71E-27 |
| LCA5L     | 6,270394 | 1,69E-06 |



|          |          |           |
|----------|----------|-----------|
| KLC3     | 6,266232 | 8,62E-07  |
| ZNRF3    | 6,261816 | 5,15E-120 |
| CEP170B  | 6,259462 | 1,29E-90  |
| P3H4     | 6,256097 | 7,57E-69  |
| CCL5     | 6,254285 | 4,10E-06  |
| MAPRE3   | 6,251359 | 1,38E-07  |
| NGEF     | 6,25114  | 6,27E-05  |
| KRT81    | 6,232982 | 1,91E-10  |
| ECHDC3   | 6,223682 | 3,95E-08  |
| ENAH     | 6,215435 | 5,09E-95  |
| NKD1     | 6,199221 | 8,90E-60  |
| RSPH1    | 6,196258 | 5,93E-06  |
| WNT10B   | 6,182504 | 6,05E-09  |
| TEX40    | 6,182214 | 7,38E-05  |
| VDR      | 6,170114 | 6,32E-27  |
| TRIM16L  | 6,158395 | 5,85E-29  |
| MYO1D    | 6,145478 | 4,11E-53  |
| HECW2    | 6,145254 | 5,83E-15  |
| ZNF165   | 6,135403 | 1,10E-38  |
| ARSD     | 6,132022 | 2,70E-31  |
| ADCY1    | 6,131118 | 6,58E-34  |
| SEPT11   | 6,129103 | 2,07E-73  |
| PTK6     | 6,125417 | 1,01E-08  |
| SLC27A3  | 6,118043 | 2,19E-24  |
| GRIP1    | 6,113621 | 5,22E-15  |
| CHDH     | 6,113203 | 1,07E-15  |
| FAM81A   | 6,093641 | 4,90E-09  |
| SDSL     | 6,078039 | 7,05E-24  |
| PODXL2   | 6,064673 | 3,19E-75  |
| TSPAN15  | 6,057417 | 4,95E-25  |
| S100A13  | 6,056839 | 4,40E-43  |
| MTERF2   | 6,045533 | 4,96E-11  |
| NSMF     | 6,028024 | 1,86E-41  |
| TRPM2-AS | 6,021218 | 0,000182  |
| DLX1     | 6,020962 | 3,51E-07  |
| C15orf65 | 6,011457 | 3,77E-07  |
| IFI27    | 6,007341 | 1,40E-06  |
| NOTUM    | 5,973145 | 3,73E-16  |
| RARG     | 5,97227  | 2,53E-49  |
| GJA3     | 5,970164 | 1,82E-08  |
| ALDH3B1  | 5,954325 | 7,64E-05  |
| GREB1    | 5,945723 | 1,49E-74  |
| PRRG2    | 5,945635 | 2,84E-09  |
| ARRDC4   | 5,945164 | 5,90E-21  |
| DBNDD1   | 5,933075 | 4,09E-55  |
| CDR2L    | 5,926917 | 2,72E-31  |
| ROR1     | 5,921756 | 0,000339  |
| SUOX     | 5,919421 | 1,62E-15  |
| RNF144B  | 5,918612 | 5,75E-07  |
| FAM160A1 | 5,912449 | 2,80E-06  |

|           |          |          |
|-----------|----------|----------|
| HPSE      | 5,909054 | 1,24E-06 |
| MAPT      | 5,903376 | 1,29E-36 |
| SIAE      | 5,90255  | 3,13E-38 |
| PLXDC2    | 5,90081  | 7,26E-30 |
| ABCB6     | 5,898977 | 4,55E-05 |
| NTN1      | 5,896537 | 5,81E-12 |
| RASGRF1   | 5,883801 | 8,66E-25 |
| C2CD4D    | 5,882519 | 0,000171 |
| HSD3B7    | 5,877595 | 1,47E-35 |
| RAB17     | 5,868842 | 1,41E-16 |
| EPB41L4B  | 5,865707 | 9,14E-37 |
| PTPN21    | 5,864551 | 2,51E-20 |
| HS6ST2    | 5,863165 | 4,92E-35 |
| PRKCZ     | 5,862807 | 2,76E-38 |
| FIRRE     | 5,858313 | 1,77E-06 |
| RGS6      | 5,858275 | 4,13E-07 |
| DPYSL4    | 5,852453 | 1,00E-12 |
| COL1A1    | 5,849883 | 3,31E-14 |
| SETD6     | 5,84628  | 1,17E-20 |
| KLF5      | 5,845149 | 6,79E-68 |
| SHOX2     | 5,828622 | 3,11E-06 |
| ZNF433    | 5,824231 | 2,72E-10 |
| N4BP3     | 5,814577 | 2,41E-29 |
| C14orf37  | 5,813523 | 3,15E-05 |
| SCARF2    | 5,813482 | 0,000524 |
| NQO1      | 5,813267 | 8,54E-27 |
| SDC3      | 5,812428 | 4,97E-30 |
| C6orf132  | 5,81163  | 1,11E-40 |
| LTBP4     | 5,792632 | 1,82E-36 |
| LOC101925 | 5,788182 | 5,53E-07 |
| C10orf35  | 5,781497 | 8,23E-12 |
| MYRFL     | 5,77994  | 0,000729 |
| ITGA2B    | 5,776085 | 3,65E-07 |
| FLRT3     | 5,770874 | 6,29E-44 |
| FGD1      | 5,759209 | 8,05E-21 |
| BEND7     | 5,757584 | 3,54E-05 |
| VSTM2L    | 5,748985 | 0,000613 |
| SUSD2     | 5,730426 | 3,96E-11 |
| TCF7L1    | 5,729855 | 1,19E-09 |
| SLC26A11  | 5,724111 | 2,76E-09 |
| PLEKHH3   | 5,720794 | 1,04E-22 |
| MOCOS     | 5,708215 | 1,04E-12 |
| TNFRSF10B | 5,701972 | 6,28E-19 |
| IFIT3     | 5,690026 | 0,000177 |
| GAS6      | 5,680645 | 3,71E-09 |
| BLNK      | 5,660097 | 0,000344 |
| BCAS3     | 5,643205 | 2,40E-84 |
| LOC100505 | 5,641182 | 0,000267 |
| ANXA9     | 5,63834  | 1,28E-22 |
| CTTN      | 5,63809  | 4,28E-67 |

|           |          |           |
|-----------|----------|-----------|
| RNF32     | 5,633785 | 1,35E-05  |
| BAIAP2    | 5,632058 | 1,70E-39  |
| ABCC3     | 5,629903 | 0,000257  |
| GJB2      | 5,623454 | 4,44E-15  |
| FN1       | 5,618679 | 1,08E-06  |
| PSEN2     | 5,609161 | 9,23E-24  |
| SMPDL3B   | 5,608236 | 1,25E-45  |
| PARVB     | 5,607175 | 3,08E-18  |
| ST5       | 5,591658 | 2,53E-12  |
| LITAF     | 5,575742 | 1,47E-47  |
| DDR1      | 5,566425 | 6,84E-42  |
| ASCL2     | 5,554096 | 4,02E-13  |
| INPP4B    | 5,553588 | 2,46E-38  |
| LOC148705 | 5,541456 | 5,77E-09  |
| CAMK1     | 5,537312 | 1,23E-06  |
| MDK       | 5,531206 | 2,36E-111 |
| CD55      | 5,522366 | 8,96E-31  |
| BBC3      | 5,519997 | 4,26E-11  |
| IFI30     | 5,513906 | 6,87E-48  |
| PLXNA4    | 5,508627 | 1,77E-16  |
| RAB30     | 5,505622 | 1,34E-32  |
| SPATS2L   | 5,505389 | 2,87E-40  |
| AK7       | 5,481894 | 2,88E-45  |
| C1QTNF6   | 5,476163 | 1,26E-07  |
| CEACAM1   | 5,472832 | 6,54E-07  |
| EFNA1     | 5,472685 | 1,19E-18  |
| TNFSF13   | 5,468394 | 2,19E-08  |
| TSKU      | 5,459518 | 6,13E-41  |
| HUNK      | 5,443629 | 1,53E-31  |
| LARGE     | 5,441173 | 8,18E-24  |
| TMEM52    | 5,435063 | 3,07E-10  |
| NR4A1     | 5,427687 | 3,24E-21  |
| PCDHGB5   | 5,42211  | 1,32E-06  |
| SH3BP5    | 5,4217   | 2,10E-95  |
| LRRC8E    | 5,410592 | 4,64E-15  |
| PTP4A3    | 5,403133 | 1,35E-35  |
| TNFRSF10A | 5,389508 | 3,52E-17  |
| MAPK8IP2  | 5,366468 | 3,69E-15  |
| ID2       | 5,3569   | 1,66E-26  |
| PHLDB1    | 5,351331 | 4,95E-27  |
| CNKSRI    | 5,347675 | 1,95E-07  |
| SYNPO2    | 5,338178 | 1,31E-15  |
| TSHZ3     | 5,337906 | 4,92E-09  |
| SMKR1     | 5,335765 | 1,20E-15  |
| IFITM3    | 5,328272 | 1,76E-34  |
| MPP7      | 5,323351 | 7,97E-36  |
| ZG16B     | 5,322724 | 2,55E-07  |
| KREMEN2   | 5,319225 | 8,13E-49  |
| ZNF205    | 5,306733 | 6,67E-25  |
| FZD7      | 5,293319 | 7,40E-19  |

|          |          |          |
|----------|----------|----------|
| PTGER2   | 5,28809  | 0,000889 |
| FLJ23867 | 5,259281 | 7,25E-26 |
| DENND2C  | 5,252752 | 6,24E-06 |
| VGF      | 5,248111 | 1,31E-28 |
| ZNF114   | 5,236011 | 7,17E-25 |
| KLF3     | 5,22966  | 9,02E-18 |
| PAX8-AS1 | 5,221436 | 3,58E-27 |
| MAPK13   | 5,2144   | 2,12E-82 |
| DEGS2    | 5,213832 | 1,41E-10 |
| PITX1    | 5,205043 | 5,65E-39 |
| PRELID2  | 5,198972 | 3,88E-10 |
| CRLF1    | 5,18407  | 2,85E-05 |
| TMEM178f | 5,183876 | 4,25E-17 |
| SPEF2    | 5,18314  | 1,04E-08 |
| ITGB4    | 5,180959 | 1,74E-55 |
| ALDOC    | 5,177996 | 5,49E-23 |
| CST3     | 5,161439 | 1,68E-53 |
| NFE2     | 5,156647 | 2,14E-07 |
| NRGN     | 5,153607 | 1,17E-11 |
| MAML2    | 5,152249 | 2,17E-10 |
| INPP5J   | 5,134923 | 0,000375 |
| CKAP4    | 5,133239 | 2,54E-83 |
| STON2    | 5,128947 | 4,74E-47 |
| MYO7A    | 5,127919 | 0,000386 |
| OASL     | 5,115109 | 0,000182 |
| GPRIN1   | 5,111623 | 1,63E-50 |
| GUCY1B3  | 5,096941 | 0,000669 |
| MYLIP    | 5,092302 | 2,09E-34 |
| AK1      | 5,087606 | 8,19E-12 |
| PKP1     | 5,080958 | 6,97E-13 |
| TBC1D16  | 5,078211 | 2,29E-73 |
| RTN4RL1  | 5,066145 | 5,72E-51 |
| BCL3     | 5,063464 | 2,09E-22 |
| IQSEC2   | 5,06293  | 4,30E-10 |
| AKR1E2   | 5,062665 | 5,84E-08 |
| BCAR3    | 5,061022 | 1,71E-06 |
| TMEM62   | 5,056079 | 4,87E-12 |
| TEX15    | 5,051669 | 5,40E-09 |
| SYDE2    | 5,049097 | 9,19E-12 |
| RASAL1   | 5,042599 | 9,69E-05 |
| GRIN2D   | 5,04243  | 5,88E-10 |
| MTUS1    | 5,039767 | 3,25E-39 |
| SYT3     | 5,038663 | 6,94E-05 |
| CTIF     | 5,038142 | 5,30E-15 |
| PROSER2  | 5,018951 | 6,44E-13 |
| PRR15    | 5,013636 | 1,74E-10 |
| DLL1     | 5,00873  | 0,000209 |
| TBC1D8   | 4,999679 | 1,83E-11 |
| STEAP1   | 4,993984 | 0,000104 |
| JDP2     | 4,987458 | 1,62E-19 |

|           |          |          |
|-----------|----------|----------|
| TINCR     | 4,9858   | 3,53E-10 |
| NDRG2     | 4,984782 | 5,73E-13 |
| ZBTB46    | 4,97852  | 0,000261 |
| HOMER2    | 4,974571 | 8,12E-65 |
| ZNF630    | 4,973455 | 1,05E-08 |
| KIF13A    | 4,963912 | 3,76E-45 |
| IGSF3     | 4,962345 | 2,66E-30 |
| OBSL1     | 4,955626 | 4,99E-26 |
| C11orf63  | 4,947602 | 0,000452 |
| PRKAA2    | 4,944833 | 2,37E-12 |
| SGMS2     | 4,943694 | 5,19E-05 |
| MNX1      | 4,932519 | 1,36E-20 |
| ZBTB7C    | 4,931884 | 6,62E-06 |
| PYGO1     | 4,930924 | 6,13E-06 |
| LYPD3     | 4,92967  | 3,26E-20 |
| SPR       | 4,929584 | 8,91E-59 |
| SSH3      | 4,923911 | 1,46E-18 |
| MFAP3L    | 4,920771 | 1,90E-15 |
| LRRC26    | 4,917952 | 2,47E-09 |
| PDLIM1    | 4,917127 | 3,33E-35 |
| AIFM2     | 4,910547 | 2,47E-29 |
| PACSIN3   | 4,906097 | 1,18E-45 |
| EHHADH    | 4,900593 | 5,24E-05 |
| CBS       | 4,894393 | 1,56E-36 |
| AGAP2-AS1 | 4,89011  | 1,99E-33 |
| HOMER3    | 4,885329 | 1,03E-39 |
| NEIL2     | 4,881217 | 1,42E-07 |
| ABTB2     | 4,878949 | 9,25E-19 |
| OSBPL6    | 4,87513  | 3,16E-11 |
| AMOTL1    | 4,869982 | 1,35E-38 |
| TSPAN9    | 4,866068 | 9,02E-11 |
| AP4B1-AS1 | 4,862704 | 3,72E-18 |
| METTTL7B  | 4,862653 | 0,000379 |
| B4GALNT3  | 4,858171 | 0,000516 |
| MTMR11    | 4,841643 | 4,30E-05 |
| SLC22A5   | 4,826923 | 5,21E-12 |
| FBLIM1    | 4,822133 | 2,88E-12 |
| RGAG4     | 4,822063 | 5,83E-07 |
| SCARB2    | 4,820448 | 3,09E-63 |
| S100A10   | 4,811005 | 5,59E-86 |
| CCM2L     | 4,809592 | 3,70E-07 |
| KREMEN1   | 4,796814 | 4,59E-32 |
| MB21D2    | 4,790576 | 1,46E-22 |
| BFSP1     | 4,789136 | 1,72E-11 |
| NFE2L3    | 4,788723 | 9,30E-36 |
| AGRN      | 4,786577 | 5,19E-68 |
| PLCB4     | 4,785415 | 1,67E-17 |
| SRRM3     | 4,779945 | 3,92E-06 |
| PVT1      | 4,778877 | 5,58E-25 |
| TMEM121   | 4,776293 | 1,46E-08 |

|          |          |          |
|----------|----------|----------|
| DNAH14   | 4,773592 | 5,30E-09 |
| SPIRE1   | 4,764763 | 5,17E-53 |
| KIAA0319 | 4,764151 | 0,000393 |
| MGAT5B   | 4,758775 | 0,000939 |
| GPR161   | 4,758642 | 1,76E-11 |
| B4GALNT1 | 4,754666 | 1,02E-19 |
| ABCB4    | 4,750298 | 0,000181 |
| ONECUT1  | 4,747813 | 0,000524 |
| FJX1     | 4,740956 | 3,91E-13 |
| NPR3     | 4,739177 | 2,02E-17 |
| ADCY9    | 4,733116 | 5,15E-05 |
| GAREM    | 4,716696 | 1,23E-08 |
| DLGAP3   | 4,709187 | 1,63E-11 |
| GCA      | 4,705885 | 9,25E-14 |
| CD151    | 4,691338 | 9,62E-61 |
| SHROOM1  | 4,689824 | 2,27E-11 |
| C3orf67  | 4,687932 | 0,000866 |
| GOLIM4   | 4,687695 | 8,17E-51 |
| ADGRG6   | 4,680003 | 1,61E-17 |
| LLGL2    | 4,675108 | 1,43E-52 |
| NANOS1   | 4,670742 | 8,03E-27 |
| GPC4     | 4,665419 | 9,24E-07 |
| VASN     | 4,664318 | 0,000514 |
| CBARP    | 4,658365 | 2,05E-06 |
| GTF2IRD1 | 4,646021 | 4,03E-63 |
| NR2F1    | 4,642615 | 3,76E-08 |
| MAPK8IP1 | 4,638852 | 1,46E-39 |
| STXBP6   | 4,62836  | 2,49E-10 |
| DDAH1    | 4,628337 | 3,74E-15 |
| NPTXR    | 4,619537 | 2,25E-20 |
| SLC29A2  | 4,617781 | 3,36E-33 |
| OLFM2    | 4,617192 | 1,51E-30 |
| SMTN     | 4,606443 | 4,60E-67 |
| SLC27A2  | 4,603584 | 3,21E-46 |
| GAA      | 4,597868 | 1,45E-49 |
| GNG13    | 4,580945 | 1,17E-05 |
| PACSIN1  | 4,575172 | 2,52E-14 |
| HSD17B14 | 4,573624 | 3,91E-05 |
| ABHD4    | 4,564071 | 5,06E-09 |
| GPR158   | 4,551005 | 7,19E-07 |
| CNFN     | 4,549809 | 0,000373 |
| PFN2     | 4,543671 | 2,77E-75 |
| LRP1     | 4,537812 | 5,65E-09 |
| PCBD1    | 4,533739 | 5,55E-74 |
| TP53INP1 | 4,521414 | 3,82E-14 |
| IGFBP4   | 4,520898 | 4,33E-09 |
| ZNF618   | 4,52083  | 7,57E-69 |
| NEURL1B  | 4,514261 | 3,30E-32 |
| DUSP4    | 4,5018   | 0,000403 |
| URB1-AS1 | 4,501664 | 1,24E-05 |

|          |          |          |
|----------|----------|----------|
| RUNX2    | 4,498905 | 2,08E-33 |
| OCLN     | 4,49184  | 6,18E-17 |
| FGD4     | 4,487073 | 1,61E-15 |
| ZNF296   | 4,486692 | 6,92E-20 |
| EFR3B    | 4,486474 | 2,49E-20 |
| EGR3     | 4,480879 | 8,34E-05 |
| FLT3     | 4,480371 | 0,000524 |
| NINJ1    | 4,467231 | 1,25E-20 |
| STX3     | 4,460803 | 2,80E-24 |
| SAMD12   | 4,458494 | 6,59E-17 |
| ENC1     | 4,456212 | 1,40E-24 |
| BMF      | 4,452773 | 7,86E-06 |
| FZD2     | 4,452044 | 2,07E-23 |
| AVPI1    | 4,44704  | 1,98E-16 |
| EPS8L2   | 4,425498 | 3,42E-27 |
| COL5A1   | 4,422774 | 4,99E-05 |
| HOOK2    | 4,421331 | 2,21E-32 |
| IFI44L   | 4,413334 | 0,000623 |
| S100A11  | 4,406186 | 4,06E-43 |
| GSTA4    | 4,402766 | 2,15E-11 |
| TNS2     | 4,397696 | 2,73E-23 |
| TENM3    | 4,370937 | 3,37E-54 |
| NHSL1    | 4,366433 | 9,00E-19 |
| CSRP2    | 4,365945 | 3,75E-15 |
| MRPL41   | 4,363447 | 9,75E-60 |
| FAAH     | 4,354689 | 1,88E-15 |
| FUT1     | 4,351911 | 6,68E-10 |
| PLEKHG5  | 4,345658 | 9,13E-13 |
| SLC46A1  | 4,342565 | 2,07E-12 |
| ERMP1    | 4,336979 | 1,67E-20 |
| ARHGEF4  | 4,331136 | 1,47E-05 |
| EHD4     | 4,330381 | 4,31E-19 |
| GNAZ     | 4,327037 | 4,50E-07 |
| ATP1B1   | 4,321881 | 6,87E-53 |
| KIAA1549 | 4,303915 | 4,94E-26 |
| REEP6    | 4,30153  | 1,23E-27 |
| CXADR    | 4,300735 | 9,09E-25 |
| RAB13    | 4,298919 | 6,17E-47 |
| BACE1    | 4,295777 | 2,39E-23 |
| GOLM1    | 4,291854 | 1,03E-20 |
| C6orf52  | 4,288467 | 2,79E-05 |
| LTBP2    | 4,288274 | 7,55E-05 |
| PTPRJ    | 4,286662 | 9,21E-16 |
| MYO1C    | 4,285455 | 1,00E-37 |
| CAMSAP3  | 4,284224 | 1,18E-29 |
| SGSH     | 4,279255 | 7,14E-22 |
| PRR36    | 4,276902 | 4,32E-70 |
| GPR176   | 4,267803 | 0,000482 |
| ACTA2    | 4,262606 | 1,17E-06 |
| TMEM184/ | 4,259323 | 2,04E-22 |

|           |          |          |
|-----------|----------|----------|
| ZNF185    | 4,258523 | 4,68E-23 |
| TMEM191/  | 4,257557 | 6,67E-17 |
| HEYL      | 4,25739  | 0,000129 |
| UNC93B1   | 4,255295 | 1,43E-35 |
| ASAH2     | 4,252661 | 2,20E-15 |
| CHST3     | 4,252163 | 4,44E-05 |
| ZNF793    | 4,248631 | 2,55E-09 |
| ANKRD34A  | 4,243976 | 5,46E-11 |
| TXNIP     | 4,241314 | 1,81E-12 |
| MERTK     | 4,239828 | 2,02E-05 |
| MAGI1     | 4,228252 | 4,50E-24 |
| CABLES1   | 4,227358 | 3,90E-12 |
| ZNF385A   | 4,224981 | 1,04E-49 |
| HSPA1A    | 4,222813 | 1,54E-23 |
| ABLIM2    | 4,217064 | 2,08E-05 |
| AGMAT     | 4,215463 | 4,97E-13 |
| PTPRU     | 4,211864 | 7,83E-28 |
| TMEM150/  | 4,192146 | 4,19E-16 |
| HIP1      | 4,189994 | 2,04E-46 |
| TUBB2B    | 4,189271 | 5,63E-11 |
| HFE       | 4,180716 | 0,000275 |
| BOD1      | 4,173048 | 1,03E-32 |
| RAB11FIP5 | 4,172796 | 8,81E-06 |
| APOE      | 4,166859 | 4,71E-08 |
| EPS8L1    | 4,147699 | 1,44E-08 |
| ALG1L     | 4,141075 | 6,23E-11 |
| TOB2P1    | 4,132592 | 0,000103 |
| NAV1      | 4,127265 | 8,25E-05 |
| NBPF15    | 4,108737 | 4,39E-21 |
| PARD6B    | 4,107041 | 6,55E-25 |
| SRCIN1    | 4,104695 | 2,74E-05 |
| ABCC2     | 4,102596 | 3,16E-05 |
| LRRC16A   | 4,094414 | 1,39E-21 |
| HCN2      | 4,09238  | 7,74E-16 |
| PWWP2B    | 4,083006 | 2,77E-21 |
| TRIM45    | 4,08276  | 9,48E-13 |
| CRACR2B   | 4,074749 | 3,67E-19 |
| IFITM10   | 4,070531 | 0,000529 |
| ICA1      | 4,063091 | 4,28E-30 |
| ARHGAP44  | 4,061878 | 5,56E-13 |
| CFAP53    | 4,060304 | 9,83E-05 |
| EGLN3     | 4,056515 | 5,94E-06 |
| GAB1      | 4,049854 | 3,75E-14 |
| SLMO1     | 4,043447 | 1,06E-07 |
| GFOD1     | 4,041105 | 9,64E-10 |
| KCNJ11    | 4,023756 | 7,04E-08 |
| NUDT14    | 4,017239 | 1,99E-16 |
| CTSO      | 4,014815 | 2,54E-06 |
| RAB26     | 4,014374 | 1,24E-06 |
| GATA2     | 4,008899 | 3,63E-08 |



|           |          |          |
|-----------|----------|----------|
| LOC389641 | 4,008085 | 0,000182 |
| USP2      | 3,995146 | 1,07E-05 |
| CASC10    | 3,991427 | 4,95E-07 |
| CYP2S1    | 3,991152 | 6,41E-11 |
| FRAS1     | 3,98015  | 6,96E-21 |
| HR        | 3,973897 | 3,09E-29 |
| MORC4     | 3,969104 | 2,24E-20 |
| IER3      | 3,967031 | 2,93E-38 |
| SEMA4G    | 3,966419 | 6,58E-06 |
| SOCS3     | 3,962655 | 7,03E-08 |
| LMTK3     | 3,957005 | 1,94E-11 |
| SQSTM1    | 3,954741 | 6,58E-27 |
| ZNF608    | 3,949325 | 2,58E-23 |
| ASS1      | 3,946505 | 1,52E-21 |
| FARP1     | 3,944499 | 6,34E-36 |
| CFAP45    | 3,944143 | 1,90E-05 |
| CDC42BPG  | 3,942165 | 7,16E-08 |
| KLHDC8B   | 3,940282 | 4,51E-07 |
| ACKR3     | 3,937601 | 1,38E-32 |
| FMO5      | 3,925187 | 0,000198 |
| OSGIN1    | 3,922841 | 3,20E-15 |
| TLDC1     | 3,917828 | 1,26E-24 |
| KRT86     | 3,914212 | 0,000877 |
| RUNDC3A-  | 3,913529 | 0,000365 |
| BCYRN1    | 3,903579 | 1,21E-31 |
| CCNO      | 3,903439 | 1,19E-05 |
| NCOA3     | 3,901779 | 1,17E-56 |
| PALM3     | 3,893151 | 0,000196 |
| BMPR2     | 3,886106 | 3,22E-36 |
| NPDC1     | 3,883854 | 5,33E-64 |
| GRHL1     | 3,883052 | 2,42E-11 |
| FAM83G    | 3,88168  | 6,15E-19 |
| HAGLR     | 3,880339 | 0,000107 |
| SUSD4     | 3,874233 | 0,000238 |
| PADI2     | 3,869412 | 1,70E-05 |
| CDK20     | 3,866843 | 4,24E-06 |
| NOTCH3    | 3,859547 | 9,43E-47 |
| TNK1      | 3,856362 | 5,22E-22 |
| ZBTB38    | 3,856208 | 8,73E-23 |
| ADAM11    | 3,853549 | 4,93E-10 |
| CGN       | 3,851985 | 1,15E-33 |
| ADAM15    | 3,844301 | 1,78E-51 |
| GRINA     | 3,840857 | 3,20E-24 |
| RASL11B   | 3,819149 | 4,35E-09 |
| USP32     | 3,817496 | 2,18E-34 |
| CKB       | 3,816635 | 1,81E-25 |
| CSPG5     | 3,809498 | 1,82E-08 |
| CCDC71L   | 3,807505 | 4,31E-16 |
| AJUBA     | 3,80584  | 1,16E-15 |
| CDYL      | 3,805659 | 4,89E-46 |

|          |          |          |
|----------|----------|----------|
| TCEA3    | 3,803245 | 6,27E-33 |
| RUSC2    | 3,802133 | 5,01E-05 |
| TUBB6    | 3,798404 | 7,58E-35 |
| ASAP3    | 3,7972   | 5,69E-12 |
| ARRB1    | 3,79032  | 1,77E-10 |
| PCAT6    | 3,786584 | 0,000876 |
| FUCA2    | 3,784883 | 1,74E-25 |
| CTNNA1   | 3,78438  | 3,07E-55 |
| ALDH7A1  | 3,783798 | 5,80E-40 |
| SEPT3    | 3,77786  | 1,58E-15 |
| ZNF239   | 3,773893 | 1,04E-08 |
| CFD      | 3,769192 | 5,86E-08 |
| CALD1    | 3,761599 | 6,98E-05 |
| PVR      | 3,757249 | 1,05E-13 |
| CAV1     | 3,754355 | 6,21E-06 |
| MGAT4B   | 3,740349 | 5,46E-59 |
| C1orf233 | 3,740194 | 2,09E-30 |
| FAM213A  | 3,722981 | 1,74E-25 |
| TSPAN17  | 3,721805 | 4,86E-36 |
| AMOT     | 3,717635 | 1,80E-28 |
| STAP2    | 3,714468 | 6,02E-31 |
| C9orf116 | 3,702819 | 9,21E-07 |
| PVRL1    | 3,696231 | 7,91E-21 |
| RP9P     | 3,69216  | 9,51E-07 |
| ELMO3    | 3,674265 | 1,41E-09 |
| FAM212B  | 3,674004 | 5,65E-12 |
| OSR2     | 3,670292 | 1,95E-10 |
| JHDM1D-A | 3,667192 | 2,17E-10 |
| NLGN2    | 3,666709 | 1,18E-26 |
| LPAR2    | 3,663594 | 4,72E-21 |
| C1orf226 | 3,644911 | 2,74E-09 |
| FAM174B  | 3,640756 | 2,34E-11 |
| MANSC1   | 3,638285 | 8,76E-12 |
| MLLT4    | 3,637844 | 3,49E-27 |
| FAM86JP  | 3,637171 | 1,23E-06 |
| C2orf15  | 3,632474 | 9,99E-19 |
| HEATR6   | 3,624311 | 7,61E-54 |
| EVI5     | 3,623112 | 1,30E-06 |
| RORA     | 3,621671 | 1,08E-17 |
| HSPA4L   | 3,620381 | 5,17E-13 |
| UBTD1    | 3,616165 | 1,12E-06 |
| DST      | 3,615123 | 7,97E-30 |
| TIAM2    | 3,602748 | 0,000824 |
| TRIM37   | 3,598611 | 2,82E-71 |
| CCPG1    | 3,59806  | 3,02E-17 |
| EIF4E3   | 3,595264 | 4,96E-11 |
| TOX2     | 3,5888   | 3,37E-06 |
| PLOD3    | 3,588095 | 8,07E-52 |
| COL18A1  | 3,586433 | 7,78E-23 |
| CGREF1   | 3,585664 | 1,55E-21 |

|            |          |          |
|------------|----------|----------|
| CAMK2N1    | 3,572275 | 6,17E-08 |
| USP43      | 3,570567 | 2,65E-07 |
| TMEM56     | 3,565736 | 0,00034  |
| C9orf3     | 3,559733 | 3,86E-21 |
| ZNF354A    | 3,556975 | 2,03E-23 |
| TTLL7      | 3,550998 | 5,44E-08 |
| FRMD6-AS1  | 3,54454  | 0,000121 |
| FAM109B    | 3,542391 | 2,48E-09 |
| HIST1H2BK  | 3,538409 | 1,67E-09 |
| DLX2       | 3,53378  | 6,69E-05 |
| SPTBN2     | 3,533576 | 1,65E-29 |
| SMARCD3    | 3,531739 | 1,70E-06 |
| FAM127A    | 3,529251 | 1,87E-15 |
| IQCE       | 3,528903 | 3,02E-39 |
| ZNF790-AS1 | 3,527749 | 2,48E-08 |
| PMEL       | 3,52428  | 0,000988 |
| CLCC1      | 3,522874 | 2,56E-31 |
| TTC23      | 3,520178 | 3,44E-16 |
| KANK1      | 3,519456 | 5,72E-15 |
| ABCA2      | 3,513296 | 5,04E-30 |
| SKIDA1     | 3,508967 | 5,32E-07 |
| RXRA       | 3,508068 | 3,51E-24 |
| CDC42EP2   | 3,507389 | 1,51E-07 |
| FAM109A    | 3,506641 | 3,70E-15 |
| PLXNB2     | 3,504829 | 4,87E-31 |
| FAM171A2   | 3,502111 | 5,95E-24 |
| GLUD2      | 3,490558 | 2,10E-10 |
| ZNF619     | 3,488673 | 4,31E-08 |
| PLCD3      | 3,487616 | 8,41E-14 |
| ZNF697     | 3,485993 | 2,20E-06 |
| FMNL2      | 3,479557 | 2,60E-18 |
| APPBP2     | 3,476857 | 2,09E-61 |
| AKAP12     | 3,476214 | 6,16E-05 |
| RGS3       | 3,469835 | 5,13E-18 |
| SAMD11     | 3,468498 | 7,16E-07 |
| PAQR7      | 3,465406 | 2,41E-12 |
| TMEM254    | 3,463872 | 2,73E-05 |
| AXIN2      | 3,463443 | 1,24E-47 |
| CDH24      | 3,459966 | 8,99E-15 |
| TPD52      | 3,451198 | 6,01E-41 |
| AIF1L      | 3,443158 | 3,81E-48 |
| FAM222A    | 3,44236  | 7,22E-25 |
| CADM4      | 3,434139 | 4,65E-14 |
| MEX3A      | 3,434101 | 2,42E-57 |
| TRIM16     | 3,431476 | 4,73E-13 |
| MTSS1      | 3,430806 | 6,61E-06 |
| ARHGEF19   | 3,429155 | 1,87E-17 |
| TP53I3     | 3,427195 | 4,04E-08 |
| LINC00467  | 3,425887 | 0,000117 |
| HAGHL      | 3,42181  | 1,40E-17 |

|           |          |          |
|-----------|----------|----------|
| PRKAR2A   | 3,420902 | 2,06E-09 |
| PRR7      | 3,416923 | 4,07E-26 |
| IL6ST     | 3,41204  | 7,43E-17 |
| FBXO6     | 3,410709 | 0,000127 |
| MGLL      | 3,408663 | 4,72E-07 |
| KLF10     | 3,397023 | 8,64E-17 |
| CITED4    | 3,395793 | 0,000121 |
| ADPRHL1   | 3,390532 | 5,14E-13 |
| MT1F      | 3,381137 | 5,86E-05 |
| RTN2      | 3,379216 | 8,22E-09 |
| CPEB2     | 3,377261 | 9,02E-09 |
| HSPB1     | 3,371525 | 2,50E-32 |
| GCNT1     | 3,356012 | 1,95E-16 |
| RBFOX2    | 3,35438  | 6,89E-26 |
| EFNA3     | 3,352291 | 2,12E-15 |
| FAM19A5   | 3,328854 | 0,000588 |
| PDGFA     | 3,327261 | 1,82E-12 |
| ADGRL1    | 3,326567 | 5,25E-31 |
| PSMD6     | 3,325738 | 7,55E-39 |
| RAB11FIP4 | 3,325504 | 5,02E-25 |
| CMTM8     | 3,322191 | 1,25E-13 |
| TCTN1     | 3,307833 | 8,87E-19 |
| ACVR2A    | 3,303331 | 1,09E-09 |
| SH3BGR    | 3,298706 | 4,46E-05 |
| LINC00858 | 3,298215 | 0,000436 |
| PCGF2     | 3,292789 | 2,00E-37 |
| UBE2Q2P2  | 3,291022 | 0,000121 |
| TGM1      | 3,285778 | 0,000292 |
| NFIX      | 3,285011 | 1,56E-16 |
| ZSCAN31   | 3,281572 | 7,18E-12 |
| SNX33     | 3,280635 | 1,82E-12 |
| TSC22D1   | 3,278324 | 8,14E-27 |
| ADGRG1    | 3,277306 | 4,07E-26 |
| KIAA1257  | 3,271322 | 0,000436 |
| BEX2      | 3,270171 | 1,69E-06 |
| CRYL1     | 3,268917 | 1,05E-17 |
| AP1S1     | 3,267016 | 4,27E-22 |
| TNIK      | 3,26493  | 7,47E-10 |
| PTMS      | 3,26123  | 6,69E-26 |
| PYCR1     | 3,253999 | 1,87E-27 |
| GLIDR     | 3,245671 | 9,81E-07 |
| ARHGEF12  | 3,244451 | 6,18E-25 |
| TYRO3     | 3,237715 | 4,61E-20 |
| PFDN4     | 3,231499 | 1,10E-40 |
| RAB27B    | 3,22708  | 3,51E-15 |
| RILPL1    | 3,223603 | 3,81E-07 |
| MMP15     | 3,220404 | 3,75E-19 |
| PCDHB14   | 3,2203   | 5,63E-11 |
| BSPRY     | 3,220033 | 2,84E-24 |
| ABHD17C   | 3,217781 | 1,26E-11 |

|           |          |          |
|-----------|----------|----------|
| DNAJC6    | 3,214988 | 0,000211 |
| CCDC113   | 3,212492 | 2,44E-07 |
| LOC11323C | 3,192028 | 5,56E-13 |
| ACTRT3    | 3,191804 | 0,00045  |
| SPHK1     | 3,189866 | 3,98E-07 |
| SYNGR3    | 3,187639 | 0,000274 |
| ADSSL1    | 3,187628 | 0,000183 |
| GLS2      | 3,186486 | 4,21E-07 |
| GLCE      | 3,184178 | 1,45E-35 |
| HDAC11    | 3,180762 | 7,42E-06 |
| SERTAD3   | 3,176212 | 5,44E-16 |
| FITM2     | 3,175128 | 3,59E-10 |
| BCL9L     | 3,169381 | 4,39E-23 |
| NR2F6     | 3,165273 | 3,56E-16 |
| CUEDC1    | 3,159026 | 1,73E-10 |
| CCT6B     | 3,156308 | 0,000132 |
| SLC25A13  | 3,153079 | 3,48E-30 |
| RPS6KB1   | 3,15141  | 2,84E-43 |
| SPATA2L   | 3,137416 | 4,86E-21 |
| FGFR3     | 3,133078 | 1,82E-13 |
| H1FO      | 3,13275  | 3,04E-12 |
| LOXL1     | 3,125465 | 7,16E-05 |
| LZTS2     | 3,125081 | 7,20E-19 |
| CHN1      | 3,123908 | 6,28E-13 |
| LPPR2     | 3,122389 | 9,61E-08 |
| FOXO6     | 3,118667 | 0,000188 |
| NDRG4     | 3,101656 | 1,08E-06 |
| GNA11     | 3,0973   | 1,22E-24 |
| ARHGEF11  | 3,093947 | 7,28E-18 |
| HHAT      | 3,091541 | 5,30E-06 |
| TMEM64    | 3,088348 | 2,40E-32 |
| SPPL2A    | 3,087012 | 2,66E-36 |
| HSPA2     | 3,081047 | 1,15E-06 |
| ZSWIM5    | 3,079065 | 8,66E-05 |
| ADAMTS19  | 3,063133 | 1,95E-22 |
| FA2H      | 3,054089 | 0,000764 |
| JUNB      | 3,049241 | 3,53E-14 |
| RTKN      | 3,044634 | 2,04E-22 |
| ZNF425    | 3,04257  | 1,30E-10 |
| C16orf46  | 3,040916 | 3,39E-06 |
| RRBP1     | 3,025681 | 4,59E-21 |
| TSC22D3   | 3,021781 | 3,21E-05 |
| PLD2      | 3,021236 | 1,65E-06 |
| EIF5AL1   | 3,013404 | 1,58E-22 |
| KATNAL2   | 3,009112 | 4,24E-06 |
| ZDHC14    | 3,007885 | 0,000202 |
| WIPI1     | 3,00571  | 7,51E-08 |
| SLC45A3   | 2,998213 | 1,51E-05 |
| HOXB7     | 2,996618 | 7,28E-09 |
| ADAP1     | 2,992519 | 2,41E-06 |

|           |          |          |
|-----------|----------|----------|
| C9orf172  | 2,990599 | 0,000134 |
| CBR3      | 2,984261 | 0,000264 |
| ABHD11    | 2,977869 | 3,10E-23 |
| MGST2     | 2,974864 | 3,64E-09 |
| NHP2      | 2,973675 | 1,27E-30 |
| DOK4      | 2,97089  | 1,21E-13 |
| BLVRA     | 2,967468 | 7,68E-21 |
| NPL       | 2,964393 | 1,88E-05 |
| EPB41L5   | 2,963665 | 4,67E-24 |
| C2orf81   | 2,962969 | 7,03E-07 |
| GUCY1A2   | 2,957491 | 1,92E-13 |
| AGAP3     | 2,956902 | 2,09E-28 |
| AMIGO1    | 2,95613  | 8,51E-05 |
| HIST1H2BD | 2,949666 | 1,89E-06 |
| KCTD1     | 2,943008 | 5,42E-18 |
| UFSP1     | 2,941411 | 5,15E-05 |
| NR1D2     | 2,939776 | 4,15E-20 |
| TMTC2     | 2,938875 | 1,02E-08 |
| TSPAN13   | 2,937212 | 8,73E-24 |
| SLC22A18  | 2,930704 | 3,86E-10 |
| FAM127B   | 2,925293 | 1,08E-34 |
| TMEM231   | 2,924574 | 5,22E-12 |
| PCDHB13   | 2,923883 | 2,04E-07 |
| TMCC2     | 2,916578 | 8,02E-06 |
| BMP4      | 2,916401 | 8,41E-08 |
| C11orf74  | 2,911238 | 1,18E-05 |
| TST       | 2,906178 | 6,28E-11 |
| PPM1D     | 2,901321 | 6,98E-33 |
| TUBB3     | 2,901159 | 3,73E-30 |
| PDE5A     | 2,901098 | 0,00041  |
| RGS16     | 2,896322 | 2,05E-05 |
| TP53TG1   | 2,890421 | 1,46E-11 |
| CHCHD10   | 2,874939 | 3,69E-33 |
| HABP4     | 2,874049 | 2,52E-11 |
| NRSN2-AS1 | 2,873945 | 6,88E-08 |
| S100A6    | 2,867961 | 7,53E-12 |
| TSPO      | 2,861731 | 2,46E-25 |
| SPAG1     | 2,857152 | 1,68E-05 |
| HSPA1B    | 2,856492 | 1,29E-11 |
| COBLL1    | 2,85507  | 2,38E-15 |
| PLAGL1    | 2,8536   | 0,000781 |
| PPFIBP1   | 2,830032 | 1,18E-19 |
| C17orf97  | 2,828225 | 2,46E-07 |
| PRDM4     | 2,822199 | 2,08E-38 |
| CDK18     | 2,821401 | 4,48E-08 |
| MOCS1     | 2,817749 | 2,88E-05 |
| AUTS2     | 2,81625  | 3,00E-16 |
| KIF1C     | 2,814705 | 1,36E-22 |
| GPT2      | 2,803903 | 1,56E-08 |
| C14orf79  | 2,795449 | 1,20E-07 |

|            |          |          |
|------------|----------|----------|
| NBPF20     | 2,793033 | 3,60E-06 |
| SLC22A31   | 2,787436 | 0,000473 |
| HIST2H2BE  | 2,777777 | 0,000141 |
| NUDT19     | 2,776864 | 1,29E-17 |
| KCNK1      | 2,773299 | 4,73E-08 |
| FRMD6      | 2,769703 | 1,20E-21 |
| IGF1R      | 2,766445 | 2,85E-24 |
| RMND5B     | 2,762889 | 1,78E-28 |
| TOB1       | 2,76173  | 2,59E-18 |
| TWF1       | 2,744539 | 1,21E-24 |
| EFNA4      | 2,742348 | 1,02E-19 |
| WASL       | 2,737039 | 5,77E-16 |
| CCDC103    | 2,721151 | 0,00016  |
| FNBP1L     | 2,717888 | 9,98E-30 |
| CTXN1      | 2,71438  | 3,17E-19 |
| B4GALT2    | 2,714297 | 2,57E-25 |
| DUSP1      | 2,708855 | 0,000327 |
| GSTZ1      | 2,706215 | 2,45E-22 |
| CERCAM     | 2,702585 | 3,80E-09 |
| TMEM2      | 2,699388 | 2,33E-20 |
| ZDHHC9     | 2,6974   | 3,42E-18 |
| HIGD2A     | 2,696739 | 6,99E-24 |
| SUMF1      | 2,68789  | 2,23E-14 |
| ARL4A      | 2,68276  | 4,91E-23 |
| GAS2L1     | 2,682314 | 2,32E-18 |
| VCL        | 2,676786 | 4,41E-11 |
| ECI1       | 2,675083 | 1,38E-24 |
| LYRM9      | 2,673314 | 0,000151 |
| RAPH1      | 2,669695 | 5,67E-13 |
| DECR2      | 2,667555 | 5,30E-16 |
| MTL5       | 2,665399 | 1,18E-07 |
| TTC9       | 2,660598 | 5,85E-19 |
| LHFPL2     | 2,653324 | 1,82E-11 |
| TATDN1     | 2,651757 | 6,31E-24 |
| CCNJL      | 2,643048 | 0,00027  |
| PON2       | 2,640315 | 6,83E-11 |
| REEP5      | 2,637469 | 1,28E-17 |
| TLE2       | 2,634878 | 2,74E-17 |
| PHACTR2    | 2,631291 | 1,64E-11 |
| BAIAP2-AS: | 2,629192 | 3,18E-05 |
| ANXA4      | 2,627813 | 2,05E-18 |
| CLMN       | 2,627151 | 1,03E-11 |
| IFNGR2     | 2,619991 | 0,000105 |
| TP53I11    | 2,618945 | 2,56E-17 |
| C11orf24   | 2,617109 | 8,90E-16 |
| RALB       | 2,614438 | 2,20E-06 |
| BCAS2      | 2,613072 | 1,57E-33 |
| PDE4DIP    | 2,609004 | 1,00E-12 |
| IL17RC     | 2,605513 | 0,000317 |
| STK32C     | 2,600006 | 9,10E-12 |

|           |          |          |
|-----------|----------|----------|
| GLUL      | 2,596216 | 2,50E-30 |
| TUBD1     | 2,591997 | 3,26E-16 |
| MYCL      | 2,588472 | 0,000254 |
| CCDC24    | 2,587886 | 8,39E-06 |
| KIF21A    | 2,587346 | 4,38E-11 |
| CAST      | 2,585622 | 1,53E-15 |
| TBC1D9B   | 2,585395 | 1,16E-28 |
| NME3      | 2,577825 | 5,41E-07 |
| LOC100125 | 2,576905 | 9,66E-07 |
| METRNL    | 2,576813 | 9,00E-17 |
| NUDT4     | 2,571725 | 1,42E-19 |
| ACOT9     | 2,570268 | 2,57E-10 |
| BHLHE40   | 2,568412 | 7,01E-16 |
| ZFP36L1   | 2,567718 | 4,46E-19 |
| TMEM63B   | 2,567289 | 4,19E-15 |
| ZNF35     | 2,565776 | 1,57E-07 |
| KCNIP3    | 2,564923 | 3,55E-05 |
| LRRC37A3  | 2,562932 | 3,06E-06 |
| VPS37C    | 2,559553 | 5,10E-17 |
| MSRB2     | 2,558971 | 4,39E-18 |
| VPS9D1-AS | 2,558108 | 5,28E-20 |
| PLEKHB1   | 2,557468 | 2,77E-05 |
| NEK3      | 2,548311 | 1,02E-05 |
| DNAJC15   | 2,546348 | 9,80E-17 |
| TMEM38A   | 2,544813 | 0,000139 |
| AKT1S1    | 2,543487 | 8,57E-16 |
| SGPL1     | 2,541782 | 9,30E-20 |
| SPATC1L   | 2,540355 | 3,36E-11 |
| DYRK1B    | 2,539614 | 3,30E-11 |
| GALNT3    | 2,536527 | 1,99E-15 |
| COQ2      | 2,535299 | 3,20E-12 |
| EPB41L4A- | 2,534201 | 1,01E-08 |
| RAB34     | 2,528264 | 1,21E-12 |
| PFKM      | 2,524629 | 3,96E-15 |
| ZCWPW1    | 2,523461 | 2,08E-05 |
| TANC2     | 2,518974 | 3,19E-14 |
| PCDHGC3   | 2,517327 | 2,49E-07 |
| CRISPLD1  | 2,516473 | 2,10E-06 |
| RRAS2     | 2,515458 | 6,82E-08 |
| ABCG1     | 2,510204 | 4,32E-10 |
| BATF      | 2,505279 | 0,000683 |
| SERINC2   | 2,50511  | 3,62E-07 |
| COTL1     | 2,504854 | 2,61E-13 |
| AAED1     | 2,500685 | 0,000174 |
| PRKCD     | 2,499758 | 1,18E-09 |
| FAM195A   | 2,497627 | 3,05E-17 |
| MYO1B     | 2,49661  | 2,79E-26 |
| CASZ1     | 2,494148 | 1,56E-09 |
| YBX2      | 2,487387 | 6,11E-16 |
| WWP1      | 2,484647 | 2,25E-11 |



|          |          |          |
|----------|----------|----------|
| MYL5     | 2,480527 | 0,000407 |
| CASKIN1  | 2,475997 | 6,20E-06 |
| ELF4     | 2,470606 | 3,73E-10 |
| GPR153   | 2,465669 | 2,54E-08 |
| PRELID1  | 2,462545 | 1,16E-18 |
| SPRYD3   | 2,462206 | 1,35E-19 |
| PODXL    | 2,461062 | 2,42E-16 |
| ACSL1    | 2,460665 | 2,52E-12 |
| NOP16    | 2,458899 | 7,77E-27 |
| MAFG-AS1 | 2,458237 | 6,38E-06 |
| ISOC2    | 2,457596 | 1,31E-14 |
| TM7SF2   | 2,456464 | 1,07E-07 |
| FCHSD1   | 2,456003 | 3,91E-05 |
| EXPH5    | 2,455755 | 1,71E-12 |
| PPP1R13L | 2,452562 | 6,38E-09 |
| ACTN1    | 2,451875 | 6,23E-15 |
| SLC50A1  | 2,443989 | 4,12E-21 |
| ZNF783   | 2,442588 | 4,79E-06 |
| DYRK2    | 2,442516 | 7,35E-11 |
| SRGAP2B  | 2,438895 | 5,95E-06 |
| C17orf58 | 2,435159 | 0,000779 |
| ATP6V1E2 | 2,432822 | 0,000132 |
| NMB      | 2,426238 | 5,75E-06 |
| MICA     | 2,425808 | 1,50E-06 |
| SLC7A5   | 2,42449  | 8,02E-19 |
| GOLGA2P7 | 2,422129 | 1,57E-05 |
| DTWD1    | 2,421131 | 5,55E-13 |
| C6orf1   | 2,419102 | 2,28E-09 |
| IDH1     | 2,411309 | 2,90E-30 |
| MPZL3    | 2,408871 | 1,81E-07 |
| GGA2     | 2,407005 | 7,32E-17 |
| LRP5     | 2,405615 | 1,33E-16 |
| SLC39A4  | 2,402283 | 1,02E-11 |
| RPL17    | 2,399199 | 8,20E-13 |
| BRIP1    | 2,3954   | 6,61E-24 |
| TMEM183F | 2,392067 | 5,93E-07 |
| ATP6V1C2 | 2,389595 | 5,60E-05 |
| CTAGE5   | 2,389569 | 1,65E-06 |
| KIAA0040 | 2,38933  | 3,42E-07 |
| KANK2    | 2,388883 | 1,39E-14 |
| SERINC5  | 2,387714 | 2,21E-12 |
| GRN      | 2,386883 | 2,87E-10 |
| MYBL1    | 2,384082 | 2,38E-05 |
| PRMT6    | 2,383733 | 2,88E-23 |
| KIAA1191 | 2,380588 | 1,49E-24 |
| SYNGR2   | 2,380024 | 1,45E-12 |
| PPFIA3   | 2,378918 | 7,54E-15 |
| PQLC3    | 2,378798 | 9,68E-08 |
| MAP3K6   | 2,376035 | 2,54E-13 |
| ZNF620   | 2,375615 | 4,79E-07 |

|           |          |          |
|-----------|----------|----------|
| ZSCAN12P1 | 2,369422 | 0,000282 |
| DLG5      | 2,369041 | 4,47E-25 |
| CSDE1     | 2,365221 | 7,22E-19 |
| SEZ6L2    | 2,362676 | 1,48E-11 |
| SPA17     | 2,359472 | 2,94E-06 |
| DUSP3     | 2,355476 | 2,72E-16 |
| IGF2BP2   | 2,351035 | 6,36E-05 |
| TXNRD3    | 2,347849 | 0,000453 |
| ZSCAN16   | 2,344905 | 7,06E-11 |
| PAIP2B    | 2,344868 | 1,24E-08 |
| ABCB9     | 2,343744 | 8,73E-05 |
| NSD1      | 2,336226 | 8,44E-30 |
| PDLIM7    | 2,333354 | 3,19E-16 |
| GAS8      | 2,332942 | 4,04E-12 |
| GPC1      | 2,332219 | 4,17E-06 |
| ZNF572    | 2,327907 | 8,86E-05 |
| RAB3D     | 2,325245 | 1,39E-13 |
| LY6E      | 2,32448  | 4,77E-09 |
| TTC39B    | 2,324464 | 0,000533 |
| SLC12A9   | 2,319851 | 1,57E-08 |
| PELI3     | 2,316108 | 4,21E-10 |
| PXN       | 2,315516 | 4,86E-14 |
| B4GALT7   | 2,313494 | 2,41E-08 |
| F11R      | 2,309275 | 2,92E-24 |
| PFKFB2    | 2,309104 | 2,74E-09 |
| DNAAF3    | 2,309049 | 4,99E-08 |
| P2RX4     | 2,308035 | 1,80E-10 |
| IDNK      | 2,301288 | 3,22E-05 |
| FUOM      | 2,298551 | 3,15E-06 |
| KDM1B     | 2,28982  | 2,73E-07 |
| SEC11A    | 2,288061 | 2,86E-26 |
| GRAMD3    | 2,286854 | 3,04E-06 |
| ANXA5     | 2,282527 | 4,02E-20 |
| TBK1      | 2,279727 | 1,22E-09 |
| CTSB      | 2,278628 | 6,85E-09 |
| LOC728554 | 2,278525 | 1,22E-09 |
| LYPLAL1   | 2,275528 | 7,81E-08 |
| NRSN2     | 2,272602 | 3,88E-09 |
| SLC22A23  | 2,271001 | 1,46E-19 |
| ALCAM     | 2,264385 | 9,89E-13 |
| FAM102B   | 2,263146 | 5,47E-11 |
| TMCO4     | 2,262263 | 1,58E-07 |
| YES1      | 2,262002 | 1,25E-20 |
| MT2A      | 2,261669 | 2,95E-13 |
| TNKS1BP1  | 2,25889  | 6,07E-22 |
| FBXO31    | 2,252405 | 1,46E-15 |
| ELL3      | 2,252067 | 2,59E-07 |
| FIS1      | 2,248581 | 1,01E-20 |
| TSEN34    | 2,247082 | 9,73E-15 |
| VAV2      | 2,246961 | 4,20E-15 |

|          |          |          |
|----------|----------|----------|
| GATAD1   | 2,246437 | 3,15E-08 |
| MYL12B   | 2,246267 | 5,48E-25 |
| VSIG10L  | 2,243556 | 5,32E-06 |
| COL9A2   | 2,243007 | 0,000116 |
| UNKL     | 2,241225 | 2,02E-05 |
| JOSD2    | 2,239335 | 4,00E-06 |
| CREB3L4  | 2,237779 | 1,21E-13 |
| STYXL1   | 2,233487 | 3,35E-13 |
| ASNS     | 2,230146 | 1,12E-07 |
| OPLAH    | 2,23001  | 6,76E-09 |
| FAM131A  | 2,228852 | 0,000284 |
| FZD5     | 2,226855 | 2,20E-07 |
| SLC2A11  | 2,219396 | 1,07E-07 |
| DNLZ     | 2,216273 | 1,16E-11 |
| ATXN7L1  | 2,214065 | 1,36E-08 |
| ZNF217   | 2,212557 | 4,60E-24 |
| THG1L    | 2,21155  | 1,27E-15 |
| TPMT     | 2,210207 | 5,24E-06 |
| TPM1     | 2,209783 | 1,29E-14 |
| TMED9    | 2,209376 | 3,07E-10 |
| FHIT     | 2,207686 | 0,000789 |
| TRAPPC2L | 2,20693  | 1,36E-18 |
| TBL1X    | 2,199735 | 5,18E-09 |
| KDEL2    | 2,198976 | 1,21E-17 |
| FRS2     | 2,195377 | 1,38E-11 |
| KCTD15   | 2,192046 | 4,65E-07 |
| SLC25A39 | 2,182387 | 1,68E-20 |
| SPINT2   | 2,177898 | 2,04E-24 |
| ANKRD42  | 2,174559 | 3,20E-06 |
| DTX4     | 2,174169 | 6,14E-05 |
| DBN1     | 2,17405  | 5,62E-20 |
| FAM86EP  | 2,171735 | 0,000237 |
| PUS7     | 2,167925 | 2,02E-12 |
| DOC2A    | 2,164561 | 0,000165 |
| ROGDI    | 2,164405 | 4,92E-10 |
| CLIP2    | 2,164212 | 3,37E-05 |
| RAB24    | 2,157374 | 8,76E-07 |
| GLMP     | 2,153158 | 2,36E-06 |
| SH2B2    | 2,149436 | 2,14E-06 |
| CNIH2    | 2,146257 | 3,15E-05 |
| SLC52A2  | 2,142099 | 1,32E-14 |
| MICALL2  | 2,141636 | 1,52E-07 |
| MAPK12   | 2,141008 | 8,04E-05 |
| B9D1     | 2,138493 | 5,97E-05 |
| PTGR2    | 2,134965 | 1,16E-06 |
| TRIM2    | 2,131093 | 8,18E-07 |
| CHPF     | 2,126416 | 1,42E-06 |
| ZSCAN21  | 2,117161 | 4,14E-12 |
| RAC3     | 2,114233 | 2,02E-10 |
| DYNLT1   | 2,112129 | 8,99E-12 |

|           |          |          |
|-----------|----------|----------|
| NRBP1     | 2,111904 | 8,43E-19 |
| FNDC3B    | 2,108807 | 9,94E-12 |
| RNLS      | 2,108296 | 0,000468 |
| SLC35B3   | 2,104882 | 1,71E-07 |
| PIAS3     | 2,104628 | 6,30E-19 |
| MSX1      | 2,103827 | 4,52E-05 |
| THOC3     | 2,102831 | 9,68E-11 |
| ACOX3     | 2,102569 | 1,26E-08 |
| SIAH2     | 2,09937  | 4,27E-13 |
| GADD45A   | 2,095003 | 2,44E-08 |
| DSTYK     | 2,094099 | 2,12E-12 |
| ZSCAN9    | 2,086666 | 1,24E-05 |
| PLXNB1    | 2,078116 | 1,93E-06 |
| DNASE2    | 2,078058 | 2,18E-11 |
| KNOP1     | 2,077226 | 6,05E-16 |
| HYAL2     | 2,072416 | 8,57E-16 |
| PRCP      | 2,071639 | 1,57E-10 |
| PPCDC     | 2,069247 | 1,39E-07 |
| RARA      | 2,068252 | 2,43E-12 |
| ZNF395    | 2,061578 | 9,54E-12 |
| EIF3E     | 2,058378 | 5,80E-13 |
| ORC5      | 2,058153 | 3,09E-08 |
| GALNS     | 2,057103 | 1,78E-07 |
| DTD1      | 2,057041 | 1,17E-10 |
| ASNA1     | 2,056704 | 1,44E-14 |
| RHOBTB3   | 2,05657  | 5,94E-15 |
| ZFP62     | 2,056509 | 1,05E-16 |
| EXD2      | 2,056027 | 1,02E-15 |
| ATP9A     | 2,052515 | 1,26E-17 |
| ICK       | 2,052252 | 2,94E-12 |
| RUSC1     | 2,051954 | 6,75E-15 |
| ATP6V0E1  | 2,050372 | 2,03E-08 |
| CD63      | 2,050289 | 5,30E-10 |
| OSCP1     | 2,048691 | 0,000819 |
| PER3      | 2,048083 | 0,000503 |
| RUFY1     | 2,047696 | 4,23E-14 |
| UEVLD     | 2,045737 | 0,000134 |
| SNX24     | 2,044607 | 1,90E-06 |
| DAG1      | 2,04319  | 1,32E-12 |
| ZNF485    | 2,039627 | 0,000193 |
| GIPC1     | 2,038946 | 1,15E-10 |
| SMURF1    | 2,038359 | 4,62E-15 |
| KCTD3     | 2,037843 | 3,74E-17 |
| CTTNBP2N1 | 2,037159 | 9,67E-10 |
| ARHGAP10  | 2,036239 | 3,83E-11 |
| ISYNA1    | 2,035948 | 3,57E-14 |
| TMEM9     | 2,033915 | 3,30E-17 |
| SNX27     | 2,033463 | 1,22E-13 |
| ID3       | 2,03315  | 5,95E-06 |
| C7orf50   | 2,029052 | 4,52E-11 |

|          |          |          |
|----------|----------|----------|
| APRT     | 2,02883  | 1,50E-12 |
| CPLX1    | 2,025532 | 3,06E-05 |
| LMAN2    | 2,02384  | 1,06E-11 |
| USP8     | 2,023325 | 1,03E-19 |
| CELSR2   | 2,023279 | 1,27E-13 |
| ANO10    | 2,020196 | 6,85E-06 |
| IER2     | 2,014347 | 8,69E-05 |
| OSBPL1A  | 2,010952 | 3,85E-12 |
| KLHL22   | 2,008793 | 2,29E-06 |
| C4orf48  | 2,005191 | 1,35E-06 |
| SNX18    | 2,00356  | 1,85E-10 |
| IQSEC1   | 2,003257 | 1,78E-12 |
| RAD51C   | 1,997582 | 4,69E-20 |
| FAF2     | 1,99713  | 5,27E-19 |
| USP31    | 1,996081 | 1,83E-08 |
| LTBP3    | 1,990633 | 3,05E-12 |
| HARS2    | 1,98967  | 1,61E-15 |
| FTH1     | 1,985734 | 1,86E-07 |
| ANXA2    | 1,984334 | 4,14E-17 |
| FAM129B  | 1,98312  | 2,05E-12 |
| ARHGAP12 | 1,982867 | 1,95E-06 |
| LDLRAP1  | 1,980934 | 0,00026  |
| HNRNPAB  | 1,977358 | 2,40E-19 |
| MEPCE    | 1,973047 | 7,25E-15 |
| VPS72    | 1,972077 | 7,07E-10 |
| MYL12A   | 1,968622 | 1,28E-17 |
| HEATR5A  | 1,967794 | 7,96E-10 |
| C5       | 1,967231 | 0,000559 |
| TRAPPC6A | 1,964882 | 9,80E-08 |
| ACACB    | 1,959299 | 4,95E-08 |
| TMOD3    | 1,958007 | 9,81E-20 |
| POLR3C   | 1,956652 | 5,33E-07 |
| TMTC3    | 1,955918 | 1,38E-09 |
| GSTM4    | 1,95454  | 1,23E-12 |
| GNB2     | 1,95051  | 2,66E-15 |
| NAAA     | 1,950375 | 3,82E-06 |
| DNAJA4   | 1,950346 | 1,49E-06 |
| GCSH     | 1,949564 | 2,29E-14 |
| NBPF9    | 1,946154 | 2,96E-06 |
| TRAF4    | 1,943589 | 1,93E-14 |
| HEBP1    | 1,942929 | 9,20E-09 |
| DDAH2    | 1,937674 | 2,15E-11 |
| KHK      | 1,936154 | 1,59E-09 |
| NAMPT    | 1,933522 | 5,46E-17 |
| KDM5B    | 1,929636 | 3,00E-10 |
| HS1BP3   | 1,928572 | 0,000215 |
| KLHL36   | 1,928344 | 5,28E-13 |
| DUS4L    | 1,926907 | 8,08E-09 |
| SLC16A13 | 1,925784 | 0,000534 |
| NRAV     | 1,923028 | 5,76E-07 |

|          |          |          |
|----------|----------|----------|
| SRD5A1   | 1,922843 | 8,60E-07 |
| MFSD3    | 1,92224  | 1,96E-12 |
| THOC7    | 1,921512 | 1,42E-13 |
| RNF208   | 1,920684 | 2,58E-06 |
| GPSM2    | 1,919449 | 2,39E-14 |
| SAPCD2   | 1,917438 | 1,27E-09 |
| SLC7A11  | 1,913377 | 2,90E-09 |
| FSCN1    | 1,911618 | 1,73E-09 |
| MAPK6    | 1,911183 | 1,27E-18 |
| ERF      | 1,910231 | 2,93E-07 |
| CORO1B   | 1,90939  | 1,26E-06 |
| DYNC2H1  | 1,907388 | 6,15E-05 |
| HTATIP2  | 1,90026  | 1,38E-07 |
| DHTKD1   | 1,899731 | 2,25E-13 |
| TMSB10   | 1,899365 | 1,28E-10 |
| SLC3A2   | 1,896433 | 1,01E-16 |
| CANX     | 1,895731 | 9,67E-16 |
| CDC42SE1 | 1,895236 | 5,97E-13 |
| TRIM3    | 1,893438 | 0,000368 |
| RPS6KL1  | 1,892957 | 0,000369 |
| IMP4     | 1,892705 | 6,22E-18 |
| PLBD2    | 1,887409 | 3,46E-07 |
| LTBP1    | 1,887118 | 1,31E-11 |
| AGTRAP   | 1,881971 | 1,73E-06 |
| ATP11A   | 1,880161 | 3,55E-06 |
| IQCK     | 1,877337 | 8,92E-06 |
| PCYOX1   | 1,876807 | 2,44E-09 |
| ALKBH2   | 1,875532 | 2,28E-08 |
| TTC8     | 1,869912 | 2,85E-08 |
| FAM227B  | 1,869401 | 0,000211 |
| SLC35B2  | 1,867366 | 1,82E-09 |
| MARVELD1 | 1,866656 | 4,65E-07 |
| LNX2     | 1,861283 | 3,95E-14 |
| ECHS1    | 1,860965 | 2,09E-10 |
| CCDC6    | 1,857749 | 1,74E-13 |
| VMP1     | 1,857694 | 4,97E-13 |
| RAB12    | 1,857647 | 3,94E-10 |
| RGL2     | 1,856931 | 6,74E-05 |
| TMEM241  | 1,853832 | 1,60E-06 |
| ADCK1    | 1,853222 | 8,62E-06 |
| CNNM4    | 1,851102 | 2,35E-09 |
| VTI1B    | 1,850684 | 1,74E-09 |
| SLC4A2   | 1,850421 | 1,04E-15 |
| ANKEF1   | 1,849492 | 3,27E-07 |
| DDX41    | 1,849106 | 5,25E-17 |
| CYP51A1  | 1,848237 | 1,30E-15 |
| CLDN12   | 1,848174 | 1,37E-05 |
| ANKRD50  | 1,846818 | 2,55E-14 |
| CYB5R1   | 1,838843 | 2,22E-06 |
| TP53INP2 | 1,833244 | 0,000366 |

|           |          |          |
|-----------|----------|----------|
| BPHL      | 1,822595 | 1,66E-07 |
| ATMIN     | 1,822505 | 3,40E-15 |
| KANSL1L   | 1,819918 | 0,000874 |
| HES4      | 1,817268 | 0,000315 |
| GNPNAT1   | 1,813997 | 3,76E-12 |
| RHOC      | 1,813916 | 3,56E-07 |
| FAM63A    | 1,813071 | 0,000307 |
| ADI1      | 1,81254  | 8,69E-12 |
| TMED3     | 1,804151 | 2,06E-09 |
| GNB2L1    | 1,803625 | 8,80E-12 |
| SLC44A1   | 1,80313  | 7,64E-14 |
| MGST3     | 1,801296 | 8,12E-06 |
| COMTD1    | 1,800736 | 9,14E-09 |
| NCKAP1    | 1,799229 | 8,69E-12 |
| SLC39A11  | 1,795094 | 5,14E-05 |
| MRPL24    | 1,794068 | 3,41E-09 |
| CRTAP     | 1,792038 | 2,03E-11 |
| NPM1      | 1,790059 | 4,62E-15 |
| C1GALT1C1 | 1,78922  | 0,000131 |
| ABCD1     | 1,786642 | 0,000795 |
| SIRT5     | 1,784023 | 4,28E-08 |
| FBXW9     | 1,77854  | 2,77E-09 |
| MAML1     | 1,777726 | 3,19E-10 |
| SOX4      | 1,776872 | 1,55E-12 |
| IMPDH1    | 1,776529 | 9,21E-12 |
| B4GALT1   | 1,772425 | 2,03E-11 |
| EGFL7     | 1,76919  | 7,27E-07 |
| SLC29A3   | 1,768482 | 0,000623 |
| NDUFB9    | 1,768455 | 3,58E-09 |
| ITPKC     | 1,768037 | 1,82E-07 |
| ETS2      | 1,767145 | 3,46E-10 |
| AEN       | 1,765436 | 7,14E-13 |
| POLR2J    | 1,760485 | 2,59E-10 |
| CYB5D2    | 1,758297 | 3,15E-05 |
| STRA13    | 1,758257 | 1,48E-13 |
| BMPR1A    | 1,756095 | 1,10E-08 |
| CYFIP1    | 1,754003 | 1,96E-13 |
| ITFG3     | 1,753639 | 2,35E-07 |
| DLD       | 1,752615 | 2,81E-09 |
| PPP1R16A  | 1,751617 | 1,27E-10 |
| UBL3      | 1,748478 | 4,84E-08 |
| APLP2     | 1,740871 | 5,89E-16 |
| ARPC1B    | 1,740292 | 2,06E-09 |
| FAM185A   | 1,738997 | 0,00027  |
| MORN2     | 1,737878 | 0,000403 |
| AKTIP     | 1,735471 | 0,000116 |
| MAP3K9    | 1,735043 | 2,63E-07 |
| SPG21     | 1,733853 | 3,57E-13 |
| PYCARD    | 1,73377  | 0,000153 |
| SYAP1     | 1,732194 | 3,66E-11 |

|           |          |          |
|-----------|----------|----------|
| PNRC1     | 1,729324 | 1,66E-07 |
| OCRL      | 1,725617 | 1,49E-07 |
| ZNF687    | 1,721023 | 1,45E-13 |
| NEU1      | 1,719258 | 0,000385 |
| TMEM251   | 1,71794  | 6,42E-08 |
| GABPB1-AS | 1,717407 | 0,000489 |
| CLTB      | 1,716208 | 1,73E-05 |
| SMAD3     | 1,716046 | 0,000426 |
| XPOT      | 1,714029 | 3,09E-10 |
| GATSL2    | 1,711863 | 2,68E-08 |
| CACNB3    | 1,711712 | 3,37E-11 |
| WDR83OS   | 1,710454 | 6,06E-13 |
| AIMP2     | 1,70949  | 1,52E-10 |
| TACO1     | 1,709474 | 1,86E-09 |
| PICK1     | 1,705587 | 4,33E-05 |
| FRMD4A    | 1,704951 | 6,28E-05 |
| HBP1      | 1,703608 | 0,000157 |
| DLGAP4    | 1,703029 | 3,84E-09 |
| ZBTB12    | 1,702798 | 0,000639 |
| ARPC1A    | 1,700596 | 1,32E-10 |
| ACTR3B    | 1,697739 | 3,21E-06 |
| IFT22     | 1,696669 | 8,48E-09 |
| AK3       | 1,695462 | 2,11E-08 |
| RNF103    | 1,695456 | 2,51E-06 |
| PHTF1     | 1,695451 | 0,000392 |
| RPP40     | 1,695219 | 8,76E-07 |
| RMND1     | 1,693265 | 5,02E-10 |
| FAM65A    | 1,691866 | 4,39E-10 |
| ITGA2     | 1,691673 | 4,16E-05 |
| SMARCD2   | 1,691069 | 8,86E-13 |
| TMEM5     | 1,690062 | 1,86E-09 |
| DCAF4     | 1,688446 | 0,000151 |
| TRAK2     | 1,688223 | 6,71E-11 |
| ARMC10    | 1,684134 | 7,57E-12 |
| FAHD1     | 1,684026 | 1,52E-09 |
| ZBTB41    | 1,683172 | 3,28E-07 |
| DCLRE1B   | 1,682057 | 4,68E-09 |
| NDUFV3    | 1,678027 | 5,37E-12 |
| ZNF3      | 1,677977 | 1,54E-10 |
| BRPF3     | 1,677158 | 1,29E-11 |
| GGCX      | 1,674451 | 4,76E-08 |
| DPCD      | 1,673772 | 6,75E-05 |
| PTRH2     | 1,670848 | 7,76E-09 |
| CPNE3     | 1,670335 | 1,00E-12 |
| TCEAL4    | 1,6701   | 3,68E-12 |
| PDXK      | 1,668159 | 1,64E-09 |
| HPCAL1    | 1,664853 | 2,02E-05 |
| FAM102A   | 1,663729 | 1,62E-11 |
| ERI2      | 1,661649 | 5,21E-07 |
| SH3YL1    | 1,659777 | 3,48E-06 |



|          |          |          |
|----------|----------|----------|
| DIRC2    | 1,659023 | 0,000303 |
| ZNF768   | 1,657941 | 4,85E-11 |
| GAS5     | 1,657568 | 0,000969 |
| CEBPZOS  | 1,657509 | 3,71E-07 |
| SLC44A2  | 1,652677 | 6,41E-10 |
| NPC2     | 1,652163 | 9,41E-08 |
| DNAJC2   | 1,652035 | 1,13E-12 |
| TMEM102  | 1,648836 | 8,49E-05 |
| BUD31    | 1,648786 | 7,83E-11 |
| RNF44    | 1,646388 | 5,52E-10 |
| NGFRAP1  | 1,645649 | 8,78E-13 |
| IFRD1    | 1,645319 | 0,000836 |
| DNAJC1   | 1,645018 | 2,77E-09 |
| TSPAN31  | 1,644609 | 0,0004   |
| PPDPF    | 1,644153 | 1,76E-07 |
| C12orf66 | 1,642898 | 0,000383 |
| CFL2     | 1,641238 | 0,000161 |
| PIGB     | 1,640869 | 7,84E-06 |
| LYSMD2   | 1,639317 | 2,65E-06 |
| CYBA     | 1,638581 | 1,03E-07 |
| PPP1R37  | 1,636879 | 0,000321 |
| TRPM7    | 1,636285 | 2,41E-08 |
| SCRIB    | 1,635161 | 1,33E-09 |
| FAM86C1  | 1,634482 | 2,62E-06 |
| STUB1    | 1,633495 | 3,56E-11 |
| KARS     | 1,632385 | 1,96E-09 |
| RNF122   | 1,631524 | 0,000367 |
| GIN1     | 1,627993 | 0,000328 |
| PHLPP1   | 1,626128 | 3,97E-10 |
| ATG101   | 1,625546 | 3,99E-08 |
| SDCCAG3  | 1,625015 | 0,000818 |
| TRIM33   | 1,623884 | 1,77E-11 |
| ZKSCAN1  | 1,622987 | 5,72E-13 |
| AP2S1    | 1,622921 | 1,32E-09 |
| TIGD5    | 1,622783 | 0,000318 |
| PLEKHF2  | 1,622125 | 9,22E-10 |
| SLC37A1  | 1,621751 | 0,000568 |
| CHCHD5   | 1,621725 | 5,76E-08 |
| SGK223   | 1,620567 | 1,18E-05 |
| TVP23B   | 1,620441 | 3,27E-06 |
| TMEM134  | 1,618455 | 4,95E-06 |
| NAPG     | 1,618152 | 1,40E-06 |
| MANBAL   | 1,617899 | 3,27E-08 |
| PIP4K2C  | 1,616431 | 4,16E-07 |
| BTG2     | 1,611756 | 0,000398 |
| CCDC47   | 1,611573 | 1,97E-12 |
| LAMTOR4  | 1,611057 | 4,15E-11 |
| MTIF3    | 1,609839 | 3,70E-06 |
| FAM50A   | 1,60699  | 2,64E-10 |
| CYC1     | 1,605585 | 7,20E-09 |

|           |          |          |
|-----------|----------|----------|
| ZNF219    | 1,603483 | 1,34E-07 |
| SMURF2    | 1,602748 | 1,89E-07 |
| ZNF778    | 1,599922 | 9,74E-07 |
| HILPDA    | 1,599088 | 3,02E-06 |
| RDH13     | 1,597491 | 1,69E-07 |
| MOSPD3    | 1,596098 | 0,000631 |
| GPR89A    | 1,595283 | 3,23E-05 |
| TMBIM4    | 1,594029 | 7,93E-07 |
| SLC35E3   | 1,59253  | 3,74E-06 |
| MDM2      | 1,591937 | 3,14E-05 |
| NRAS      | 1,590777 | 1,91E-10 |
| IFT43     | 1,589247 | 6,07E-06 |
| AGPAT3    | 1,587047 | 6,81E-09 |
| HRSP12    | 1,585168 | 5,99E-05 |
| SLC25A24  | 1,583891 | 1,01E-10 |
| BNIP3     | 1,583478 | 6,88E-09 |
| ATG14     | 1,581801 | 0,000555 |
| NUBP1     | 1,578876 | 3,09E-05 |
| SCARB1    | 1,576463 | 7,71E-07 |
| POR       | 1,575869 | 1,90E-10 |
| CALM1     | 1,575776 | 8,93E-09 |
| RHOQ      | 1,575628 | 2,64E-06 |
| CLOCK     | 1,575539 | 4,48E-08 |
| RNF115    | 1,568621 | 9,83E-08 |
| LOC642852 | 1,566099 | 0,000171 |
| BCAP31    | 1,56451  | 6,48E-08 |
| ITPK1     | 1,563378 | 2,44E-08 |
| C12orf45  | 1,562611 | 8,19E-06 |
| ZNF786    | 1,562526 | 1,48E-06 |
| CLN3      | 1,561745 | 3,04E-05 |
| EPHX1     | 1,559897 | 0,001015 |
| MRPS21    | 1,559756 | 7,91E-12 |
| LLPH      | 1,556938 | 7,41E-11 |
| PRDX4     | 1,556391 | 4,25E-07 |
| PRDX2     | 1,554877 | 4,23E-08 |
| HSCB      | 1,554837 | 3,40E-05 |
| NAB2      | 1,553778 | 0,000373 |
| PSMD4     | 1,553682 | 6,54E-14 |
| TMEM192   | 1,553109 | 1,96E-06 |
| GLRX2     | 1,550178 | 2,60E-05 |
| PNMA1     | 1,54782  | 1,02E-08 |
| APH1A     | 1,547485 | 3,03E-11 |
| ZDHHC21   | 1,546643 | 0,000202 |
| IMPA2     | 1,544536 | 3,79E-07 |
| GBA       | 1,543074 | 1,80E-05 |
| FLAD1     | 1,542251 | 5,80E-11 |
| ILVBL     | 1,539495 | 5,17E-08 |
| LEO1      | 1,535061 | 1,61E-12 |
| BRI3      | 1,534563 | 1,02E-07 |
| SLC19A2   | 1,532016 | 0,000284 |

|          |          |          |
|----------|----------|----------|
| SMAGP    | 1,531767 | 4,46E-07 |
| TRAP1    | 1,530174 | 4,01E-08 |
| BOLA1    | 1,529471 | 3,21E-06 |
| ZNF627   | 1,527652 | 1,59E-06 |
| ZNF629   | 1,527448 | 2,17E-08 |
| SLC25A10 | 1,527095 | 3,07E-06 |
| RBAK     | 1,525599 | 1,17E-05 |
| THNSL1   | 1,525027 | 1,54E-07 |
| SIL1     | 1,525018 | 2,12E-05 |
| PAM      | 1,522979 | 2,11E-05 |
| TMEM168  | 1,518232 | 4,61E-08 |
| DYNLL2   | 1,518149 | 4,78E-12 |
| TIMM9    | 1,515675 | 2,28E-05 |
| YIF1A    | 1,514666 | 1,56E-10 |
| WIBG     | 1,514027 | 8,81E-08 |
| IQCH-AS1 | 1,513697 | 0,000164 |
| TAF13    | 1,513058 | 3,94E-05 |
| TMEM14A  | 1,510311 | 5,61E-05 |
| HMG20B   | 1,508701 | 1,08E-10 |
| ANKIB1   | 1,508467 | 6,27E-08 |
| TIGD6    | 1,505229 | 0,000336 |
| FBXW4    | 1,504518 | 2,04E-06 |
| IER5     | 1,504305 | 1,49E-06 |
| RNASET2  | 1,503521 | 0,000191 |
| USP3     | 1,502456 | 8,92E-10 |
| MDH2     | 1,501817 | 8,87E-08 |
| SLC39A6  | 1,50136  | 1,07E-06 |
| TRIM24   | 1,499819 | 8,66E-10 |
| OTUD7B   | 1,498359 | 1,65E-08 |
| CCDC112  | 1,498161 | 3,73E-05 |
| ARPP19   | 1,495216 | 4,36E-11 |
| ARRDC3   | 1,493257 | 5,08E-05 |
| ACOT13   | 1,492961 | 6,83E-07 |
| KDELRL1  | 1,490497 | 9,84E-09 |
| SIMC1    | 1,487332 | 0,000679 |
| TRMT12   | 1,486723 | 9,26E-06 |
| TRMT5    | 1,483955 | 3,68E-08 |
| TPRN     | 1,481973 | 1,61E-06 |
| EBAG9    | 1,481905 | 2,66E-06 |
| MGC72080 | 1,481407 | 1,86E-05 |
| NIT2     | 1,481369 | 6,06E-08 |
| METTL8   | 1,479558 | 5,54E-08 |
| BAG3     | 1,477726 | 0,000255 |
| MTCH1    | 1,477652 | 3,21E-10 |
| TKFC     | 1,476742 | 1,03E-07 |
| RP9      | 1,476272 | 1,77E-05 |
| DAAM1    | 1,475696 | 2,26E-07 |
| PAK4     | 1,475589 | 7,84E-08 |
| PDCD4    | 1,475508 | 4,26E-07 |
| SLC25A30 | 1,47459  | 2,07E-06 |

|          |          |          |
|----------|----------|----------|
| AFG3L2   | 1,47421  | 2,03E-11 |
| NR2C2AP  | 1,473447 | 0,000787 |
| RNF13    | 1,468237 | 2,57E-08 |
| STX7     | 1,468133 | 3,61E-05 |
| PAWR     | 1,467924 | 3,55E-05 |
| KLF7     | 1,467201 | 0,00036  |
| NSMCE2   | 1,46262  | 8,90E-07 |
| GDE1     | 1,461951 | 1,10E-06 |
| VRK2     | 1,45659  | 3,08E-05 |
| CRTC1    | 1,454171 | 5,26E-07 |
| PTPN18   | 1,451674 | 9,22E-07 |
| SRGAP2   | 1,450894 | 2,65E-10 |
| ARL6IP1  | 1,449268 | 4,95E-11 |
| PPP1R15A | 1,447541 | 0,000143 |
| TMEM205  | 1,446418 | 4,81E-05 |
| EFCAB11  | 1,444752 | 0,000161 |
| DNPH1    | 1,444372 | 4,99E-07 |
| PPP1R3D  | 1,443388 | 0,000376 |
| MED21    | 1,442432 | 6,03E-06 |
| SEMA4B   | 1,440445 | 2,16E-05 |
| ZMIZ2    | 1,44007  | 7,33E-11 |
| SLC35F2  | 1,436611 | 9,09E-05 |
| SNHG16   | 1,435611 | 1,73E-08 |
| ZBTB4    | 1,435378 | 8,22E-09 |
| TMEM159  | 1,432902 | 0,00027  |
| FUT8     | 1,432162 | 1,42E-09 |
| ZMIZ1    | 1,430254 | 2,15E-07 |
| MPDU1    | 1,429669 | 9,83E-07 |
| HIPK1    | 1,428048 | 6,80E-08 |
| PSMB5    | 1,427908 | 2,23E-08 |
| PTEN     | 1,424975 | 9,73E-09 |
| INPPL1   | 1,424892 | 2,52E-09 |
| ARF3     | 1,421318 | 3,47E-08 |
| ZNF74    | 1,421106 | 1,22E-07 |
| MIPEP    | 1,420795 | 1,23E-06 |
| TMEM183  | 1,419527 | 1,05E-06 |
| BCL2L11  | 1,417491 | 1,38E-05 |
| NMD3     | 1,417248 | 2,93E-07 |
| DHCR7    | 1,415543 | 2,53E-05 |
| STK36    | 1,415406 | 5,24E-05 |
| MRFAP1   | 1,414993 | 1,04E-08 |
| PSEN1    | 1,413366 | 1,45E-07 |
| RWDD2B   | 1,411449 | 4,19E-05 |
| CD3EAP   | 1,409149 | 1,13E-05 |
| GABPB1   | 1,406968 | 3,36E-06 |
| COX5B    | 1,406201 | 6,88E-09 |
| SPOPL    | 1,402499 | 2,12E-05 |
| GPATCH2  | 1,401973 | 5,94E-06 |
| GNS      | 1,401511 | 0,000559 |
| MFSD10   | 1,39572  | 1,61E-07 |

|           |          |          |
|-----------|----------|----------|
| ESRRA     | 1,39566  | 1,07E-07 |
| MXD4      | 1,394457 | 0,001013 |
| TIGAR     | 1,393007 | 3,30E-05 |
| OSGIN2    | 1,392351 | 4,74E-06 |
| ACAA2     | 1,391852 | 3,48E-05 |
| BCAP29    | 1,390186 | 1,12E-06 |
| PSMC2     | 1,390047 | 2,04E-09 |
| NTMT1     | 1,387835 | 4,07E-08 |
| SLC39A1   | 1,387611 | 7,87E-05 |
| ZNF787    | 1,387369 | 6,34E-07 |
| ENSA      | 1,386356 | 7,84E-12 |
| TOMM7     | 1,384766 | 1,07E-06 |
| ARFIP2    | 1,38449  | 3,81E-06 |
| ALDH1B1   | 1,380067 | 3,62E-07 |
| PIK3R2    | 1,37896  | 5,61E-05 |
| KIF20A    | 1,378892 | 1,53E-07 |
| FKBPL     | 1,377681 | 0,000177 |
| TNIP2     | 1,376207 | 6,24E-08 |
| SLC25A1   | 1,375212 | 2,94E-05 |
| CARM1     | 1,374885 | 5,26E-07 |
| KRCC1     | 1,372927 | 7,51E-05 |
| MGAT1     | 1,372396 | 3,50E-06 |
| GTF2IRD2B | 1,371907 | 0,000565 |
| TES       | 1,371035 | 0,000195 |
| PTPMT1    | 1,371002 | 1,12E-06 |
| MRPS2     | 1,367544 | 9,91E-08 |
| NBN       | 1,367307 | 2,72E-10 |
| ARL8A     | 1,366093 | 2,81E-07 |
| METTL2A   | 1,365909 | 7,99E-06 |
| COPS6     | 1,365459 | 2,25E-07 |
| KDM6B     | 1,365147 | 2,60E-07 |
| ATP5J2    | 1,363248 | 6,53E-06 |
| C5orf30   | 1,362962 | 1,92E-06 |
| FAM177A1  | 1,362826 | 2,89E-05 |
| ASAH1     | 1,360368 | 0,000123 |
| ENDOV     | 1,360151 | 0,000103 |
| UIMC1     | 1,359128 | 0,000358 |
| SWI5      | 1,357365 | 1,31E-05 |
| PYCRL     | 1,35671  | 5,18E-06 |
| TNPO2     | 1,3559   | 0,000522 |
| CNOT6     | 1,353709 | 2,11E-08 |
| ACTN4     | 1,352529 | 6,39E-06 |
| RPL26L1   | 1,347391 | 4,30E-05 |
| GOLGA5    | 1,346393 | 1,88E-05 |
| RHEB      | 1,345284 | 3,35E-07 |
| OGG1      | 1,344886 | 3,23E-05 |
| SCAMP1    | 1,343543 | 1,85E-06 |
| MCL1      | 1,342561 | 9,26E-11 |
| LGALS1    | 1,342401 | 0,000756 |
| KIF3B     | 1,342306 | 1,80E-06 |

|          |          |          |
|----------|----------|----------|
| SAT1     | 1,341889 | 4,22E-05 |
| RAB1A    | 1,33925  | 7,31E-06 |
| MTERF1   | 1,335725 | 0,000233 |
| SMC6     | 1,334113 | 5,34E-06 |
| CENPB    | 1,333778 | 7,70E-08 |
| NFIC     | 1,332528 | 3,71E-08 |
| JUND     | 1,331575 | 0,00042  |
| ALKBH4   | 1,328761 | 5,41E-06 |
| TAGLN2   | 1,328738 | 2,57E-06 |
| TIPARP   | 1,326479 | 0,000289 |
| SLC29A4  | 1,323861 | 0,000169 |
| SLIRP    | 1,323231 | 7,15E-06 |
| NUMA1    | 1,322705 | 1,12E-09 |
| UQCC3    | 1,322663 | 2,58E-06 |
| SIPA1L1  | 1,322662 | 6,82E-08 |
| KCMF1    | 1,322607 | 1,64E-06 |
| DNAJC30  | 1,32237  | 4,56E-05 |
| ARF5     | 1,321948 | 3,82E-08 |
| TCTN3    | 1,320822 | 9,42E-06 |
| RAB3IP   | 1,320721 | 1,45E-08 |
| TSTA3    | 1,315143 | 1,71E-07 |
| PRDX6    | 1,314907 | 4,59E-06 |
| TAMM41   | 1,313512 | 3,24E-05 |
| YIPF2    | 1,308829 | 1,41E-06 |
| PLP2     | 1,308764 | 1,21E-05 |
| COX4I1   | 1,308619 | 1,20E-07 |
| DNAAF2   | 1,308066 | 3,15E-06 |
| DHRS7B   | 1,307009 | 6,47E-05 |
| SLC35F5  | 1,305509 | 0,000726 |
| TBCC     | 1,30447  | 3,33E-05 |
| PABPC1   | 1,304254 | 2,04E-07 |
| PEX13    | 1,303558 | 9,82E-06 |
| RBSN     | 1,301577 | 7,90E-06 |
| MRPS25   | 1,300009 | 3,33E-06 |
| PSRC1    | 1,298655 | 0,00027  |
| ATP6V0E2 | 1,297221 | 0,000379 |
| TMEM141  | 1,295593 | 4,94E-07 |
| SLC24A1  | 1,295401 | 3,44E-05 |
| NLN      | 1,294683 | 4,13E-08 |
| DARS2    | 1,292713 | 4,26E-07 |
| SUV420H1 | 1,291941 | 1,91E-07 |
| HSBP1    | 1,290924 | 1,82E-08 |
| MED13L   | 1,290741 | 1,64E-06 |
| NGRN     | 1,288507 | 4,53E-08 |
| CRK      | 1,288012 | 2,14E-08 |
| DUSP16   | 1,287984 | 1,50E-06 |
| HDDC2    | 1,28789  | 4,72E-07 |
| TMEM120/ | 1,287618 | 0,000254 |
| CLTC     | 1,285303 | 6,82E-06 |
| BLOC1S3  | 1,284653 | 0,000144 |

|          |          |          |
|----------|----------|----------|
| CERS2    | 1,282729 | 2,02E-08 |
| SHB      | 1,282272 | 0,000485 |
| TFG      | 1,281317 | 1,26E-07 |
| DCXR     | 1,280824 | 3,94E-06 |
| C20orf27 | 1,280484 | 8,81E-06 |
| NQO2     | 1,280303 | 2,99E-05 |
| WDR73    | 1,279347 | 0,000741 |
| CHCHD4   | 1,27814  | 0,000542 |
| PTK7     | 1,277313 | 5,22E-07 |
| COX6C    | 1,27709  | 4,80E-08 |
| FAM3A    | 1,274302 | 1,24E-05 |
| BCL2L1   | 1,271042 | 0,000176 |
| ZNF252P  | 1,270595 | 5,98E-07 |
| NACC1    | 1,26997  | 3,12E-07 |
| SLC10A3  | 1,26863  | 0,000511 |
| ATP5H    | 1,266764 | 4,20E-06 |
| PDAP1    | 1,266724 | 3,18E-08 |
| MAP3K1   | 1,266641 | 7,07E-05 |
| ZBTB42   | 1,266526 | 1,89E-05 |
| FOSL2    | 1,266451 | 0,000355 |
| TAF11    | 1,265393 | 7,52E-07 |
| COA4     | 1,264717 | 7,95E-07 |
| SHFM1    | 1,264474 | 1,76E-08 |
| EARS2    | 1,2641   | 3,18E-06 |
| TMEM127  | 1,264048 | 8,76E-06 |
| MCCC2    | 1,263074 | 2,20E-06 |
| KLHDC10  | 1,261086 | 7,88E-07 |
| WDYHV1   | 1,259159 | 0,000439 |
| ZNF480   | 1,257215 | 2,82E-05 |
| FKBP4    | 1,253838 | 8,69E-05 |
| ATP5D    | 1,253279 | 2,21E-06 |
| MRPS12   | 1,253164 | 5,28E-06 |
| RMDN1    | 1,251834 | 5,33E-06 |
| RNF149   | 1,251721 | 7,89E-06 |
| RINT1    | 1,251463 | 7,97E-05 |
| UBE3C    | 1,247648 | 1,99E-06 |
| RPL30    | 1,247488 | 8,98E-05 |
| CBLL1    | 1,246816 | 3,99E-06 |
| ZNF623   | 1,246344 | 3,47E-05 |
| MPP5     | 1,246325 | 1,01E-06 |
| TEX2     | 1,245697 | 2,96E-07 |
| NDUFB10  | 1,242941 | 1,32E-05 |
| ECE2     | 1,241076 | 0,000764 |
| TMEM43   | 1,239009 | 5,47E-05 |
| MAPK9    | 1,237438 | 6,92E-07 |
| SYPL1    | 1,23553  | 5,00E-07 |
| CNOT4    | 1,234823 | 1,10E-05 |
| HMGB3    | 1,234822 | 3,69E-09 |
| FAM83D   | 1,233783 | 4,86E-06 |
| MLKL     | 1,233525 | 0,000523 |

|          |          |          |
|----------|----------|----------|
| CHURC1   | 1,233449 | 0,000131 |
| DLG3     | 1,232295 | 1,41E-06 |
| RBM8A    | 1,231705 | 6,49E-08 |
| PEA15    | 1,231642 | 1,71E-05 |
| PTPN12   | 1,229779 | 3,04E-06 |
| SFXN4    | 1,229605 | 7,52E-06 |
| PLCB3    | 1,227992 | 0,000111 |
| ZNF398   | 1,227973 | 6,71E-07 |
| MRPL14   | 1,22782  | 5,07E-06 |
| PITPNC1  | 1,227416 | 2,28E-06 |
| DSTN     | 1,22707  | 0,00012  |
| TARS2    | 1,226081 | 2,61E-05 |
| CUX1     | 1,225623 | 1,28E-06 |
| ATP1A1   | 1,22511  | 4,14E-06 |
| NANS     | 1,222446 | 0,000335 |
| C6orf47  | 1,221213 | 2,61E-06 |
| SF3B4    | 1,220983 | 9,23E-07 |
| CBX2     | 1,220275 | 1,36E-06 |
| GCC1     | 1,220224 | 8,46E-06 |
| RNF14    | 1,220045 | 0,000122 |
| AVL9     | 1,218866 | 1,07E-07 |
| SETDB1   | 1,217902 | 2,72E-06 |
| TBL2     | 1,216717 | 2,45E-05 |
| NEO1     | 1,216582 | 7,57E-06 |
| EMC2     | 1,215569 | 0,000143 |
| C21orf33 | 1,215361 | 0,000227 |
| HDDC3    | 1,213456 | 0,000179 |
| SOX12    | 1,213283 | 1,11E-05 |
| PIK3C2A  | 1,212936 | 0,000254 |
| NPC1     | 1,210725 | 7,70E-06 |
| ZBTB9    | 1,204243 | 0,000257 |
| EEFSEC   | 1,203353 | 0,000325 |
| TMEM87B  | 1,200912 | 0,00059  |
| SLC37A4  | 1,199896 | 2,07E-06 |
| RPL12    | 1,199791 | 0,000193 |
| HEBP2    | 1,196898 | 0,000787 |
| PSMB4    | 1,195779 | 2,71E-06 |
| ZNF277   | 1,195291 | 0,00013  |
| MREG     | 1,192551 | 4,67E-05 |
| POLR1D   | 1,191314 | 4,64E-08 |
| PSMD7    | 1,189686 | 2,34E-08 |
| CSTB     | 1,187441 | 4,84E-06 |
| NFKBIL1  | 1,182931 | 5,36E-05 |
| PTTG1IP  | 1,182912 | 9,65E-07 |
| PRKCI    | 1,18216  | 2,65E-06 |
| BCKDK    | 1,180503 | 6,74E-05 |
| NDUFS2   | 1,178776 | 4,70E-05 |
| CHPT1    | 1,178399 | 6,87E-05 |
| FAM220A  | 1,177271 | 0,000863 |
| DPY19L1  | 1,177167 | 0,000597 |



|          |          |          |
|----------|----------|----------|
| GGCT     | 1,177023 | 1,05E-06 |
| MCU      | 1,175645 | 0,00049  |
| EMC3     | 1,174979 | 0,000523 |
| AP4E1    | 1,174565 | 7,59E-05 |
| PPIL1    | 1,172993 | 4,40E-06 |
| RHBDD2   | 1,171968 | 0,001013 |
| ZNF710   | 1,170862 | 8,93E-05 |
| TMEM184F | 1,170254 | 0,000125 |
| SMUG1    | 1,170009 | 0,000786 |
| FZD1     | 1,16909  | 0,000106 |
| ALDH6A1  | 1,168882 | 9,07E-06 |
| BRMS1    | 1,168832 | 3,37E-05 |
| PRKAG1   | 1,168704 | 0,000168 |
| SURF2    | 1,168022 | 7,27E-05 |
| ATP6AP1  | 1,167192 | 0,000121 |
| MRPL42   | 1,167099 | 3,67E-06 |
| ATN1     | 1,165406 | 5,05E-07 |
| TUBB4B   | 1,165376 | 2,58E-05 |
| CETN2    | 1,165316 | 0,000807 |
| ANGEL1   | 1,164597 | 2,51E-05 |
| ASAP1    | 1,16314  | 2,11E-06 |
| ASH1L    | 1,160903 | 3,64E-05 |
| CUL7     | 1,16015  | 0,000295 |
| PDCD10   | 1,159434 | 1,53E-05 |
| PFKL     | 1,15726  | 8,33E-05 |
| AARS     | 1,15686  | 0,000304 |
| FBRS     | 1,155899 | 1,99E-07 |
| AURKA    | 1,155172 | 6,24E-06 |
| CMC2     | 1,154774 | 7,00E-05 |
| ZNF579   | 1,154646 | 7,45E-05 |
| AFF4     | 1,152277 | 2,08E-07 |
| ZNF581   | 1,15015  | 0,000362 |
| G6PC3    | 1,147612 | 0,000449 |
| ACTR10   | 1,147118 | 0,000169 |
| FBXO22   | 1,146995 | 4,36E-05 |
| SNAPC4   | 1,146659 | 0,000191 |
| H2AFJ    | 1,146381 | 0,000952 |
| TMEM11   | 1,141594 | 3,40E-05 |
| GCLC     | 1,141205 | 0,000738 |
| LAMTOR1  | 1,140008 | 0,00011  |
| UBAC1    | 1,137921 | 5,36E-06 |
| RNF121   | 1,135981 | 0,000373 |
| TRIAP1   | 1,135759 | 0,000152 |
| HSPA9    | 1,130322 | 6,01E-05 |
| NFS1     | 1,127315 | 0,00012  |
| STX4     | 1,126197 | 0,000367 |
| PACS2    | 1,125746 | 1,13E-05 |
| HSD17B4  | 1,125408 | 5,84E-05 |
| COQ9     | 1,124743 | 1,86E-05 |
| MBTPS2   | 1,122862 | 0,000725 |

|          |          |          |
|----------|----------|----------|
| C19orf43 | 1,12022  | 7,13E-07 |
| VIMP     | 1,11941  | 3,73E-05 |
| SLC2A4RG | 1,119046 | 9,68E-05 |
| RAD23B   | 1,118905 | 2,61E-07 |
| HCFC1R1  | 1,117688 | 6,86E-05 |
| FAM189B  | 1,117026 | 0,000331 |
| PEX10    | 1,116724 | 0,000197 |
| TCF25    | 1,11667  | 1,20E-06 |
| SNRPE    | 1,116114 | 5,04E-07 |
| PSMD12   | 1,111306 | 0,000149 |
| TMEM254  | 1,110665 | 0,000547 |
| PDCD6    | 1,10997  | 0,000285 |
| ZNF704   | 1,108194 | 0,000877 |
| C8orf82  | 1,107691 | 0,000317 |
| DOLK     | 1,107643 | 0,000787 |
| RPS3     | 1,107008 | 0,000236 |
| JTB      | 1,106735 | 3,88E-05 |
| KIAA0196 | 1,105396 | 7,82E-06 |
| XXYLT1   | 1,103102 | 0,000105 |
| PTGES2   | 1,102912 | 1,48E-05 |
| DLG1     | 1,102862 | 5,95E-06 |
| UNG      | 1,102201 | 1,21E-05 |
| MTFR1    | 1,100843 | 0,000285 |
| ARRDC1   | 1,099566 | 7,59E-05 |
| LSG1     | 1,098925 | 1,66E-05 |
| NPTN     | 1,09845  | 1,57E-05 |
| CREG1    | 1,097839 | 0,000172 |
| FAM53C   | 1,097406 | 0,000274 |
| PDCL3    | 1,097194 | 0,000133 |
| MRPS33   | 1,096253 | 0,000215 |
| DNPEP    | 1,095833 | 1,54E-05 |
| MTCH2    | 1,094134 | 0,000777 |
| IFT46    | 1,092713 | 0,00024  |
| LOC90784 | 1,092292 | 8,55E-05 |
| FTSJ3    | 1,091307 | 8,61E-05 |
| NDUFC1   | 1,09124  | 0,000315 |
| ZFP1     | 1,090374 | 0,000275 |
| THAP5    | 1,090363 | 3,15E-05 |
| NDFIP1   | 1,089395 | 5,55E-06 |
| SLC39A7  | 1,087026 | 3,21E-05 |
| RARS     | 1,086777 | 5,47E-05 |
| TUBA1C   | 1,079577 | 6,90E-05 |
| MIDN     | 1,07871  | 1,62E-05 |
| DERL1    | 1,078052 | 0,000122 |
| RPL35A   | 1,076884 | 0,000528 |
| RPL8     | 1,073928 | 0,000206 |
| OSER1    | 1,073688 | 0,000307 |
| SEL1L    | 1,071435 | 2,04E-06 |
| CTPS2    | 1,071283 | 0,000111 |
| PSMA3    | 1,070815 | 0,000444 |

|          |          |          |
|----------|----------|----------|
| TTC39C   | 1,070743 | 0,000545 |
| SIKE1    | 1,069727 | 0,00026  |
| ABCF3    | 1,067204 | 0,000234 |
| RPL13    | 1,067007 | 0,000827 |
| CSNK1G3  | 1,066438 | 7,05E-05 |
| PMVK     | 1,066425 | 0,000845 |
| PHAX     | 1,065473 | 1,62E-05 |
| PLA2G12A | 1,064445 | 0,000784 |
| C7orf73  | 1,063209 | 6,54E-06 |
| RPS14    | 1,06319  | 0,00039  |
| SPTSSA   | 1,061993 | 0,000746 |
| WIZ      | 1,060987 | 7,96E-06 |
| HSPA4    | 1,059691 | 0,00054  |
| C5orf15  | 1,059648 | 8,93E-05 |
| COG4     | 1,056658 | 0,000201 |
| CSRP1    | 1,053601 | 0,000415 |
| KRTCAP2  | 1,051487 | 6,37E-06 |
| RAB6A    | 1,051366 | 0,000412 |
| TANC1    | 1,04921  | 0,000358 |
| CHMP1B   | 1,047975 | 0,000441 |
| PHF23    | 1,047736 | 0,000168 |
| ABLIM1   | 1,045261 | 0,000376 |
| OS9      | 1,044553 | 0,000161 |
| DHRS7    | 1,042501 | 0,000221 |
| TRIP4    | 1,041895 | 0,000555 |
| MMAB     | 1,041363 | 0,00031  |
| GPX4     | 1,039367 | 0,00027  |
| SEC62    | 1,037971 | 1,07E-05 |
| MRPS18B  | 1,036812 | 0,0002   |
| PI4KB    | 1,036047 | 4,73E-05 |
| RNF139   | 1,034668 | 2,89E-05 |
| LAMP1    | 1,034586 | 0,000203 |
| MRPL30   | 1,033435 | 2,33E-05 |
| CENPN    | 1,033065 | 7,51E-06 |
| ZNF12    | 1,032992 | 0,000166 |
| LAPTM4A  | 1,03294  | 3,63E-05 |
| CCDC9    | 1,030289 | 0,000562 |
| EXOSC4   | 1,029427 | 0,000125 |
| SPNS1    | 1,029143 | 0,000634 |
| PPP1R11  | 1,028427 | 0,000249 |
| RNASEH2A | 1,027811 | 7,00E-05 |
| TRIM26   | 1,027294 | 0,000168 |
| NELFCD   | 1,024806 | 2,27E-05 |
| DNMT3B   | 1,023597 | 0,000285 |
| WBSCR22  | 1,023255 | 6,60E-05 |
| DGKZ     | 1,022904 | 0,000222 |
| PLK1     | 1,022524 | 0,000895 |
| TRIM41   | 1,020452 | 0,00097  |
| HMBS     | 1,019738 | 0,00022  |
| SFXN1    | 1,019198 | 9,57E-05 |

|          |          |          |
|----------|----------|----------|
| MTIF2    | 1,018488 | 3,81E-05 |
| CNIH1    | 1,017004 | 0,000202 |
| VAPB     | 1,016898 | 0,000187 |
| CDKN3    | 1,01596  | 0,000869 |
| TMEM97   | 1,014167 | 7,88E-05 |
| NFKBIA   | 1,012941 | 0,001009 |
| GTPBP10  | 1,012293 | 0,000878 |
| RRAGA    | 1,011708 | 0,000155 |
| PWP1     | 1,010858 | 3,83E-05 |
| PKP4     | 1,010686 | 8,20E-05 |
| SPATS2   | 1,006385 | 6,95E-05 |
| RRP1     | 1,006126 | 0,000818 |
| PTPRF    | 1,00446  | 4,13E-05 |
| COX6A1   | 1,00359  | 0,000158 |
| PPCS     | 1,003367 | 0,00062  |
| PAQR4    | 1,003357 | 0,000418 |
| TPT1     | 1,002877 | 0,000895 |
| TMEM14C  | 1,001926 | 0,000385 |
| TOMM40   | 1,000426 | 0,000364 |
| PEMT     | 0,999944 | 0,001011 |
| UBQLN4   | 0,999817 | 2,43E-05 |
| MRRF     | 0,999305 | 0,000138 |
| PSMC1    | 0,998942 | 1,99E-05 |
| ATP5A1   | 0,997696 | 6,04E-06 |
| HEXB     | 0,9969   | 0,000476 |
| NFE2L2   | 0,99552  | 0,000182 |
| JAGN1    | 0,994405 | 0,000742 |
| LAMTOR2  | 0,990314 | 0,000111 |
| BTBD7    | 0,988971 | 0,000229 |
| BRWD1    | 0,987982 | 0,000296 |
| EEF2K    | 0,987181 | 0,000146 |
| ASPSCR1  | 0,983986 | 0,000229 |
| LMTK2    | 0,982302 | 0,000282 |
| AHSA1    | 0,981712 | 2,41E-05 |
| IRAK1    | 0,979893 | 0,000456 |
| DCTPP1   | 0,97876  | 0,00051  |
| RPRD2    | 0,978063 | 8,55E-05 |
| ATXN7L3B | 0,974713 | 7,76E-06 |
| WDFY3    | 0,974356 | 0,000808 |
| ZMYND11  | 0,972873 | 5,36E-05 |
| HACD3    | 0,970839 | 1,65E-05 |
| MAP1LC3B | 0,969761 | 0,000306 |
| RBM4     | 0,968436 | 0,00099  |
| PPP1R14B | 0,964982 | 0,000838 |
| ANKS1A   | 0,9618   | 0,000282 |
| TADA3    | 0,961406 | 0,000408 |
| NUCKS1   | 0,959986 | 2,19E-05 |
| PDCD5    | 0,959294 | 9,68E-05 |
| TARBP2   | 0,959255 | 0,000349 |
| SPTLC2   | 0,958334 | 0,000346 |

|         |          |          |
|---------|----------|----------|
| RRP15   | 0,958156 | 0,000174 |
| PRR13   | 0,957661 | 0,000275 |
| NDUFB7  | 0,954075 | 7,30E-05 |
| TMEM147 | 0,951862 | 0,000623 |
| KDM2A   | 0,95039  | 6,08E-05 |
| STK38   | 0,948555 | 0,000489 |
| ARNT    | 0,946852 | 7,29E-05 |
| HDGF    | 0,946137 | 5,78E-05 |
| MRPL15  | 0,944922 | 9,20E-05 |
| DCAF13  | 0,94079  | 0,000772 |
| PSMC5   | 0,939484 | 0,000427 |
| PUF60   | 0,936573 | 0,000476 |
| RCN1    | 0,933638 | 9,09E-05 |
| PPP1R2  | 0,932841 | 0,000667 |
| TIMM10  | 0,930636 | 0,000192 |
| TSPAN14 | 0,930211 | 0,000762 |
| TMED10  | 0,925435 | 0,00038  |
| FAM89B  | 0,924501 | 0,000911 |
| CAMSAP1 | 0,920566 | 5,84E-05 |
| SCD     | 0,920376 | 4,76E-05 |
| USP6NL  | 0,920231 | 0,000565 |
| NSUN5   | 0,920169 | 0,000461 |
| TUFM    | 0,918821 | 0,000135 |
| STX6    | 0,916381 | 0,000173 |
| MRPS23  | 0,914407 | 0,000457 |
| LRFN4   | 0,911534 | 0,000425 |
| ZNF652  | 0,911041 | 0,000493 |
| RPE     | 0,908421 | 0,000686 |
| CDC25B  | 0,907446 | 0,000564 |
| EIF2AK1 | 0,90524  | 4,17E-05 |
| GRK6    | 0,901121 | 0,000695 |
| BRK1    | 0,899139 | 0,000399 |
| TIMMDC1 | 0,895754 | 0,00068  |
| NCBP2   | 0,893035 | 3,96E-05 |
| KPNA2   | 0,880941 | 0,000311 |
| UBE2Z   | 0,879879 | 0,000124 |
| TRIP11  | 0,874977 | 0,00092  |
| MTMR4   | 0,872133 | 0,000214 |
| DSG2    | 0,869831 | 0,000232 |
| NOTCH2  | 0,866571 | 0,000769 |
| RNF7    | 0,855324 | 0,000859 |
| VPS25   | 0,852239 | 0,000673 |
| CCT2    | 0,851754 | 0,000331 |
| CUL1    | 0,849301 | 0,000667 |
| SOS1    | 0,845649 | 0,000758 |
| MED13   | 0,836427 | 0,000107 |
| FAM91A1 | 0,834823 | 0,000421 |
| PAPOLA  | 0,834178 | 0,000154 |
| VPS4B   | 0,830039 | 0,000983 |
| VPS52   | 0,828681 | 0,000466 |

|         |          |          |
|---------|----------|----------|
| SMG7    | 0,826364 | 0,000244 |
| YIPF3   | 0,825346 | 0,000765 |
| TCOF1   | 0,818454 | 0,000503 |
| CLUH    | 0,818211 | 0,000131 |
| PDIA4   | 0,817047 | 8,26E-05 |
| TAX1BP1 | 0,816346 | 0,000439 |
| HECTD1  | 0,816009 | 0,000321 |
| TAF6    | 0,815987 | 0,0009   |
| MLF2    | 0,813776 | 0,000347 |
| PFDN5   | 0,812407 | 0,00095  |
| GEMIN5  | 0,811586 | 0,000632 |
| PICALM  | 0,8094   | 0,000793 |
| PPP4R3A | 0,803962 | 0,000458 |
| HMGN1   | 0,799889 | 0,00035  |
| TOMM6   | 0,795889 | 0,000801 |
| CACUL1  | 0,79556  | 0,000799 |
| EIF2S1  | 0,793321 | 0,000852 |
| TOR3A   | 0,792909 | 0,0009   |
| ERAL1   | 0,791998 | 0,000765 |
| DBI     | 0,784721 | 0,000359 |
| CAND1   | 0,781615 | 0,000884 |
| UBE2Q1  | 0,774477 | 0,000967 |
| KIF5B   | 0,771237 | 0,000302 |
| PROSER1 | 0,767053 | 0,000635 |
| MORF4L2 | 0,751948 | 0,000839 |
| H3F3B   | 0,723022 | 0,000734 |
| ABCE1   | -0,72912 | 0,000954 |
| THRAP3  | -0,73542 | 0,000751 |
| ANP32A  | -0,74525 | 0,000493 |
| ACACA   | -0,77334 | 0,001009 |
| TTC3    | -0,79272 | 0,000289 |
| CHD7    | -0,79408 | 0,000887 |
| GNB1    | -0,79783 | 0,000527 |
| ELAVL1  | -0,80059 | 0,001004 |
| SEPT2   | -0,80138 | 0,000461 |
| RTF1    | -0,80548 | 0,000444 |
| HCFC1   | -0,80995 | 0,000144 |
| ITCH    | -0,81631 | 0,000587 |
| HMGCR   | -0,81743 | 0,000624 |
| STAG2   | -0,82156 | 0,000129 |
| CCT8    | -0,82324 | 0,000431 |
| MLLT1   | -0,82582 | 0,000821 |
| COPB1   | -0,82585 | 0,000274 |
| LRRFIP1 | -0,83997 | 0,000221 |
| APPL1   | -0,84029 | 0,000582 |
| SEP15   | -0,84677 | 0,000355 |
| WBP11   | -0,84723 | 0,000228 |
| NAP1L4  | -0,84856 | 0,000913 |
| FAAP100 | -0,84856 | 0,000873 |
| DIS3    | -0,85513 | 0,000802 |

|          |          |          |
|----------|----------|----------|
| MLLT6    | -0,85943 | 0,000233 |
| MTG2     | -0,85971 | 0,001024 |
| PSMA1    | -0,86449 | 0,000207 |
| TOP2B    | -0,86601 | 5,62E-05 |
| STT3B    | -0,86838 | 0,000979 |
| QARS     | -0,86985 | 0,000796 |
| DCAF15   | -0,87253 | 0,000447 |
| KPNA6    | -0,87354 | 0,000292 |
| UGP2     | -0,87452 | 0,000546 |
| MKI67    | -0,87521 | 0,000551 |
| REXO1    | -0,87537 | 0,000456 |
| ADD1     | -0,87548 | 0,000604 |
| TCF20    | -0,87678 | 0,00027  |
| ZNF644   | -0,87973 | 0,000456 |
| SMAD2    | -0,88497 | 0,000112 |
| UCK2     | -0,88533 | 0,000787 |
| PCGF5    | -0,89001 | 0,000442 |
| CNOT1    | -0,89153 | 0,000193 |
| ARHGAP11 | -0,89221 | 0,000529 |
| NSMAF    | -0,89379 | 0,000603 |
| PDE12    | -0,8943  | 0,00086  |
| BRD7     | -0,89645 | 0,000187 |
| HNRNPUL2 | -0,8974  | 0,000321 |
| NCAPH    | -0,90014 | 0,000126 |
| NCOR1    | -0,90122 | 6,59E-05 |
| DHX30    | -0,90405 | 3,30E-05 |
| KIAA0430 | -0,9043  | 0,000347 |
| CDK12    | -0,90433 | 0,000104 |
| AP3M1    | -0,90748 | 0,000119 |
| AQR      | -0,90964 | 0,000378 |
| PPP6R1   | -0,91046 | 0,000398 |
| SFXN2    | -0,91199 | 0,000743 |
| ANKLE2   | -0,91234 | 0,000406 |
| MED1     | -0,91249 | 4,51E-05 |
| CENPO    | -0,91518 | 0,000321 |
| ST13     | -0,91684 | 0,000238 |
| TRAM2    | -0,91685 | 0,000164 |
| GRAMD1A  | -0,91725 | 0,000122 |
| AK2      | -0,91843 | 0,000154 |
| TGS1     | -0,91895 | 0,000345 |
| SF3A2    | -0,91936 | 0,00103  |
| ASXL1    | -0,92108 | 4,53E-05 |
| WHSC1    | -0,92268 | 0,000148 |
| ZZEF1    | -0,92287 | 0,00019  |
| PRKDC    | -0,92454 | 0,000215 |
| NECAP2   | -0,92571 | 0,000712 |
| CRLS1    | -0,92724 | 0,000748 |
| ATP6V1B2 | -0,92731 | 0,000161 |
| SUB1     | -0,92973 | 0,000157 |
| USP33    | -0,93095 | 0,000455 |

|         |          |          |
|---------|----------|----------|
| RFC1    | -0,93126 | 7,66E-05 |
| AGL     | -0,93325 | 0,000529 |
| CHML    | -0,93485 | 0,000758 |
| COPS8   | -0,93675 | 0,000762 |
| SNRNP40 | -0,937   | 0,000574 |
| CPD     | -0,94158 | 0,000413 |
| ASPM    | -0,94748 | 0,000686 |
| PHF3    | -0,94752 | 0,000442 |
| ASXL2   | -0,94867 | 0,0006   |
| FTSJ1   | -0,94992 | 0,000267 |
| NUP93   | -0,95042 | 0,000309 |
| LANCL1  | -0,95073 | 0,000124 |
| ATXN10  | -0,95089 | 0,000154 |
| TRIM25  | -0,95108 | 0,000267 |
| SRRM1   | -0,95135 | 0,000246 |
| RAB27A  | -0,95153 | 0,000476 |
| API5    | -0,95303 | 6,24E-05 |
| POLA1   | -0,95432 | 0,000555 |
| RBX1    | -0,955   | 0,000944 |
| IPO5    | -0,95696 | 0,000139 |
| UBE2G2  | -0,9579  | 3,18E-05 |
| MCM10   | -0,95924 | 6,11E-05 |
| CASP2   | -0,96177 | 2,25E-05 |
| MSH2    | -0,96202 | 2,96E-05 |
| WDR82   | -0,96289 | 2,60E-05 |
| MAFK    | -0,9629  | 0,000649 |
| CSNK2A1 | -0,96371 | 4,32E-05 |
| KIF11   | -0,96392 | 8,24E-06 |
| NBAS    | -0,9645  | 0,000695 |
| BBX     | -0,96451 | 0,000916 |
| DNTTIP1 | -0,96676 | 0,000846 |
| ABCC1   | -0,96914 | 3,84E-05 |
| DENND2D | -0,97439 | 0,000158 |
| SRP9    | -0,97466 | 3,41E-05 |
| BRD3    | -0,97529 | 0,000248 |
| DYNC1H1 | -0,97529 | 0,000122 |
| OSBP    | -0,97614 | 0,000218 |
| LAS1L   | -0,97637 | 0,000623 |
| SH3BP5L | -0,97786 | 0,000369 |
| SON     | -0,97788 | 2,45E-05 |
| CASC4   | -0,97927 | 0,000126 |
| NIPBL   | -0,98112 | 3,27E-05 |
| KIF2C   | -0,9814  | 0,000406 |
| RBCK1   | -0,98485 | 6,39E-06 |
| BICD2   | -0,98486 | 0,000116 |
| RRM1    | -0,98519 | 0,000206 |
| ZNF367  | -0,98671 | 0,000952 |
| PHRF1   | -0,98834 | 6,53E-06 |
| KPNA3   | -0,98884 | 0,000392 |
| C2CD3   | -0,98933 | 9,88E-05 |



|          |          |          |
|----------|----------|----------|
| ABI2     | -0,99395 | 9,35E-06 |
| CSTF2T   | -0,99399 | 0,000173 |
| GIT2     | -0,99458 | 4,70E-05 |
| C22orf39 | -0,99488 | 0,000971 |
| ATPIF1   | -0,99798 | 5,25E-05 |
| WDR24    | -0,99834 | 0,000461 |
| ALG9     | -0,9987  | 0,000282 |
| DDHD1    | -0,99895 | 0,00018  |
| PPP1R18  | -1,00253 | 0,000459 |
| DHFR     | -1,00336 | 3,15E-05 |
| BLM      | -1,00336 | 0,00055  |
| CDK11B   | -1,00571 | 3,59E-05 |
| SLC16A1  | -1,00774 | 0,000191 |
| CEP104   | -1,00849 | 0,000368 |
| LIN54    | -1,00981 | 6,74E-05 |
| L3MBTL2  | -1,00985 | 0,000102 |
| MTMR1    | -1,0121  | 0,000102 |
| RAB3GAP2 | -1,01308 | 0,000572 |
| SLBP     | -1,01388 | 0,000106 |
| FAM111B  | -1,01523 | 0,000205 |
| CHCHD2   | -1,01679 | 3,64E-05 |
| CCDC34   | -1,01996 | 0,001017 |
| CTR9     | -1,02056 | 0,000921 |
| DES12    | -1,02117 | 0,000105 |
| PATL1    | -1,02157 | 1,91E-05 |
| EXOSC9   | -1,02266 | 0,000209 |
| SAAL1    | -1,02745 | 0,000164 |
| TRIM44   | -1,02923 | 0,000141 |
| PSME1    | -1,02995 | 6,27E-05 |
| C4orf27  | -1,0307  | 0,000494 |
| TTI1     | -1,03295 | 2,45E-05 |
| MRE11A   | -1,0359  | 0,000997 |
| SGOL2    | -1,03689 | 5,84E-05 |
| OSBPL8   | -1,03741 | 7,86E-06 |
| XAB2     | -1,0375  | 0,000367 |
| HMGN2    | -1,03798 | 3,05E-05 |
| COL4A3BP | -1,03888 | 0,000325 |
| MCM5     | -1,04039 | 0,000264 |
| DCTN3    | -1,04048 | 0,000833 |
| HIATL1   | -1,04145 | 0,000522 |
| CHORDC1  | -1,04219 | 0,000163 |
| FRYL     | -1,0437  | 5,55E-05 |
| ZNF747   | -1,04575 | 0,000514 |
| ARID1A   | -1,04875 | 1,19E-06 |
| ALAD     | -1,05014 | 0,000301 |
| GBA2     | -1,05204 | 0,000821 |
| EIF2AK4  | -1,05215 | 7,53E-05 |
| MEN1     | -1,05378 | 1,50E-05 |
| ADSS     | -1,05473 | 5,84E-05 |
| UBA5     | -1,05484 | 0,000266 |

|          |          |          |
|----------|----------|----------|
| CENPF    | -1,05509 | 1,94E-05 |
| ITM2B    | -1,05542 | 3,12E-05 |
| DDA1     | -1,05748 | 7,29E-05 |
| ERCC6L   | -1,05804 | 0,000364 |
| EP300    | -1,0583  | 0,000107 |
| VPS16    | -1,05878 | 0,000357 |
| MAP3K4   | -1,0594  | 0,000386 |
| ZMYM3    | -1,06006 | 7,39E-06 |
| UBQLN2   | -1,06112 | 7,75E-05 |
| ARL2BP   | -1,06149 | 0,000765 |
| PRPS1    | -1,06216 | 0,000335 |
| WNK1     | -1,06294 | 2,07E-06 |
| CHD1     | -1,06345 | 3,87E-06 |
| RALGAPA2 | -1,06723 | 0,000359 |
| IFNAR1   | -1,06729 | 0,000447 |
| CDC6     | -1,06793 | 0,000158 |
| ACAT2    | -1,06801 | 5,58E-05 |
| TRPC4AP  | -1,06802 | 3,79E-05 |
| VPS36    | -1,06839 | 0,000102 |
| PIIP5K2  | -1,07028 | 8,51E-05 |
| TPP1     | -1,07086 | 0,000541 |
| HERC1    | -1,07182 | 1,91E-05 |
| TACC1    | -1,07412 | 1,23E-05 |
| PARP1    | -1,07606 | 9,94E-07 |
| ERCC6L2  | -1,07663 | 0,00011  |
| KHNYN    | -1,0767  | 0,00045  |
| PNP      | -1,07678 | 1,51E-05 |
| POT1     | -1,07885 | 0,000466 |
| MGA      | -1,08019 | 5,50E-05 |
| HMGN3    | -1,0805  | 4,93E-05 |
| MKL1     | -1,0807  | 6,56E-05 |
| SEC22C   | -1,08148 | 0,000164 |
| LARS2    | -1,08234 | 6,26E-05 |
| SUN2     | -1,08335 | 2,27E-05 |
| CACTIN   | -1,08401 | 0,000167 |
| JARID2   | -1,08505 | 2,92E-06 |
| NF2      | -1,08584 | 0,000107 |
| DDX3X    | -1,0864  | 1,73E-07 |
| C22orf46 | -1,08714 | 0,000203 |
| RNF138   | -1,08731 | 7,84E-05 |
| KANSL1   | -1,0874  | 0,000277 |
| DIDO1    | -1,08741 | 7,00E-07 |
| CEPT1    | -1,088   | 0,00012  |
| ATG4B    | -1,09051 | 3,29E-05 |
| SMARCAD1 | -1,09264 | 6,40E-05 |
| MAPKAPK3 | -1,09273 | 0,000897 |
| SOAT1    | -1,09296 | 0,000271 |
| HSD17B12 | -1,09321 | 8,15E-05 |
| UBE3A    | -1,09342 | 3,79E-06 |
| MOB1A    | -1,09368 | 7,05E-05 |

|          |          |          |
|----------|----------|----------|
| ALAS1    | -1,0939  | 0,000362 |
| FEN1     | -1,09459 | 3,40E-06 |
| AES      | -1,09525 | 7,62E-06 |
| ERO1A    | -1,09726 | 3,28E-05 |
| SREK1IP1 | -1,09804 | 2,91E-05 |
| SGSM3    | -1,09912 | 0,000421 |
| ZNF275   | -1,09959 | 0,000251 |
| WASF2    | -1,10064 | 9,94E-06 |
| OXSR1    | -1,10241 | 2,68E-05 |
| PJA2     | -1,10325 | 2,18E-06 |
| ZNF335   | -1,10326 | 0,000271 |
| TMED5    | -1,10353 | 0,000124 |
| MTA3     | -1,10498 | 1,50E-06 |
| MIER2    | -1,10545 | 0,00061  |
| INTS7    | -1,106   | 2,89E-05 |
| SLC25A40 | -1,10718 | 0,000588 |
| NCAPG    | -1,10946 | 1,20E-05 |
| MFAP1    | -1,1106  | 0,000212 |
| AKR1A1   | -1,11204 | 2,29E-05 |
| VRK1     | -1,11566 | 1,15E-05 |
| KDM2B    | -1,11615 | 2,83E-06 |
| OTUD5    | -1,1162  | 0,000179 |
| LRP12    | -1,11698 | 0,000114 |
| INPP5K   | -1,11758 | 0,000646 |
| ZSWIM1   | -1,1201  | 0,000193 |
| RHOT1    | -1,12129 | 3,41E-05 |
| DNMT3A   | -1,12306 | 4,46E-06 |
| PGK1     | -1,12345 | 2,43E-06 |
| LIMD1    | -1,1253  | 0,00013  |
| NONO     | -1,12571 | 2,42E-06 |
| BAG2     | -1,12812 | 9,99E-05 |
| RPAP1    | -1,12837 | 8,66E-06 |
| NDUFB8   | -1,12999 | 0,000243 |
| C1orf112 | -1,13015 | 0,000294 |
| ZNF37A   | -1,13219 | 9,20E-06 |
| ATF2     | -1,13274 | 6,85E-06 |
| FAM98B   | -1,1338  | 6,95E-05 |
| CD44     | -1,13485 | 3,95E-05 |
| TYW3     | -1,13712 | 2,69E-05 |
| TRIM35   | -1,13718 | 0,000726 |
| ZC3H7B   | -1,13838 | 2,74E-06 |
| EXO1     | -1,13862 | 2,09E-05 |
| ZNF343   | -1,13888 | 0,000483 |
| CTPS1    | -1,13982 | 1,95E-06 |
| HMGXB4   | -1,13985 | 8,72E-06 |
| RHOG     | -1,14373 | 0,00015  |
| HIRA     | -1,1451  | 3,50E-07 |
| ARIH2    | -1,1459  | 7,72E-07 |
| FPGS     | -1,14606 | 0,000115 |
| LRRC41   | -1,14661 | 7,04E-06 |

|          |          |          |
|----------|----------|----------|
| ICE2     | -1,14816 | 3,11E-06 |
| VPRBP    | -1,1484  | 1,88E-06 |
| RAB11B   | -1,14923 | 1,20E-05 |
| TUBGCP3  | -1,15088 | 2,29E-05 |
| PHKA2    | -1,15133 | 5,68E-05 |
| C11orf57 | -1,15166 | 2,86E-05 |
| ASH2L    | -1,15262 | 1,96E-05 |
| ZNF740   | -1,15359 | 0,000133 |
| SF3A3    | -1,15444 | 0,000486 |
| TMEM237  | -1,15612 | 6,39E-05 |
| MAGOH    | -1,15708 | 3,49E-06 |
| POLDIP3  | -1,15768 | 0,000104 |
| MTMR2    | -1,15808 | 4,68E-05 |
| RPRD1B   | -1,15811 | 3,67E-05 |
| CDC40    | -1,15962 | 0,000154 |
| RNF38    | -1,15981 | 0,000273 |
| ASCC3    | -1,16154 | 0,000992 |
| MED4     | -1,16168 | 5,69E-05 |
| URB2     | -1,16244 | 4,64E-05 |
| ARID4B   | -1,16274 | 0,000318 |
| MBNL3    | -1,1628  | 4,47E-07 |
| FKBP1A   | -1,16296 | 6,26E-06 |
| OSBPL2   | -1,16346 | 1,94E-05 |
| USE1     | -1,16353 | 0,000628 |
| MFSD6    | -1,16631 | 0,00047  |
| NDUFAF3  | -1,16811 | 9,21E-05 |
| HTRA2    | -1,16833 | 7,07E-05 |
| VPS13D   | -1,16859 | 8,81E-06 |
| BNIP2    | -1,16933 | 3,22E-05 |
| UBR7     | -1,17027 | 2,20E-07 |
| JADE2    | -1,17071 | 0,000168 |
| HMGA1    | -1,17251 | 0,000106 |
| RRM2     | -1,17539 | 6,99E-08 |
| TAP2     | -1,17544 | 0,000282 |
| EBLN3    | -1,17691 | 9,28E-06 |
| NCAPD2   | -1,17763 | 4,55E-06 |
| RPTOR    | -1,17779 | 5,23E-05 |
| TRMT6    | -1,17803 | 3,36E-06 |
| NOP9     | -1,17932 | 1,09E-05 |
| FAM217B  | -1,18035 | 1,40E-05 |
| RAD51    | -1,18189 | 6,74E-05 |
| DENND1B  | -1,18195 | 0,000658 |
| DNMT1    | -1,183   | 1,58E-05 |
| CLEC16A  | -1,18375 | 7,51E-06 |
| RNF123   | -1,18405 | 9,16E-06 |
| INTS9    | -1,18422 | 3,58E-05 |
| EID2     | -1,18431 | 0,000329 |
| SNRNP48  | -1,18712 | 8,68E-06 |
| PLK4     | -1,1873  | 6,42E-05 |
| ORAI2    | -1,18839 | 0,000337 |

|           |          |          |
|-----------|----------|----------|
| EDEM3     | -1,19249 | 5,36E-05 |
| GSG2      | -1,19405 | 0,000333 |
| PTPN6     | -1,19776 | 0,000162 |
| ZCCHC9    | -1,19827 | 0,000247 |
| H2AFV     | -1,19912 | 1,23E-06 |
| FNTA      | -1,19975 | 7,39E-05 |
| AGBL5     | -1,20137 | 0,000492 |
| STAM      | -1,20218 | 0,000138 |
| GXYLT1    | -1,20263 | 1,21E-05 |
| SIVA1     | -1,20498 | 4,03E-06 |
| TMX4      | -1,2064  | 1,12E-05 |
| PRDM2     | -1,20644 | 4,50E-05 |
| PSMB2     | -1,20755 | 1,25E-06 |
| TOP2A     | -1,2086  | 1,97E-05 |
| PPWD1     | -1,21    | 0,000783 |
| PI4KA     | -1,21089 | 2,50E-07 |
| TTC31     | -1,21152 | 0,000162 |
| PIKFYVE   | -1,21193 | 0,000611 |
| FH        | -1,21223 | 2,18E-07 |
| SMYD4     | -1,21366 | 0,000388 |
| TNRC6C    | -1,21483 | 9,78E-08 |
| CHAF1B    | -1,21501 | 0,00015  |
| PLAGL2    | -1,21502 | 1,32E-06 |
| CTDP1     | -1,21612 | 0,000216 |
| MID1IP1   | -1,21647 | 0,000935 |
| LRRCC1    | -1,21943 | 0,000334 |
| NVL       | -1,2198  | 1,70E-05 |
| CHEK1     | -1,22162 | 2,74E-07 |
| MDN1      | -1,22188 | 2,24E-06 |
| TMEM230   | -1,22351 | 8,72E-07 |
| SMAD4     | -1,22374 | 9,79E-06 |
| GPKOW     | -1,2238  | 0,000228 |
| MIA3      | -1,22391 | 3,63E-07 |
| LMF2      | -1,22409 | 5,10E-05 |
| RNF219    | -1,22665 | 3,85E-05 |
| CPSF1     | -1,22858 | 3,42E-05 |
| CALML4    | -1,22895 | 0,000633 |
| SRSF11    | -1,23047 | 4,92E-05 |
| DCAF12    | -1,23071 | 2,48E-07 |
| C9orf78   | -1,23089 | 6,32E-07 |
| LDHA      | -1,23126 | 2,09E-06 |
| PHF2      | -1,23233 | 0,000233 |
| HEATR5B   | -1,23361 | 5,18E-05 |
| DONSON    | -1,23938 | 0,000235 |
| ST6GALNAc | -1,23949 | 0,000747 |
| HS6ST1    | -1,24182 | 1,85E-06 |
| KIAA1147  | -1,24277 | 2,74E-05 |
| GLI3      | -1,24318 | 0,000459 |
| PREP      | -1,24325 | 8,96E-05 |
| SFI1      | -1,24573 | 0,001029 |

|          |          |          |
|----------|----------|----------|
| GTF2B    | -1,24869 | 0,000429 |
| TFDP1    | -1,24882 | 8,37E-09 |
| SLC20A1  | -1,24956 | 1,13E-08 |
| ASB1     | -1,25    | 2,43E-05 |
| CBL      | -1,25098 | 5,19E-06 |
| TERF2    | -1,25237 | 5,72E-06 |
| PCIF1    | -1,25347 | 1,08E-06 |
| MPRIP    | -1,25593 | 9,94E-07 |
| FAM122A  | -1,25772 | 0,000212 |
| CEP78    | -1,25936 | 3,00E-06 |
| ATG2B    | -1,26081 | 4,35E-05 |
| ERI1     | -1,26112 | 4,99E-06 |
| SCAF4    | -1,26288 | 0,000207 |
| AP1M1    | -1,26473 | 0,000145 |
| ORMDL3   | -1,26501 | 0,000193 |
| NLK      | -1,26616 | 4,72E-06 |
| MED8     | -1,26679 | 4,96E-05 |
| VPS37B   | -1,26973 | 4,03E-06 |
| BAP1     | -1,26999 | 3,37E-08 |
| TAF1     | -1,27181 | 9,22E-05 |
| UFL1     | -1,27273 | 3,46E-05 |
| TRAF3IP2 | -1,27286 | 0,000153 |
| FANCD2   | -1,27471 | 6,01E-06 |
| GMPPB    | -1,27629 | 3,09E-05 |
| IPO5P1   | -1,27665 | 0,000243 |
| ZBED4    | -1,27763 | 2,72E-05 |
| NR2C2    | -1,27789 | 1,37E-06 |
| PDE6D    | -1,28262 | 0,000246 |
| C2orf44  | -1,28297 | 0,000184 |
| STAT3    | -1,28319 | 0,000572 |
| C12orf4  | -1,28339 | 0,000206 |
| USP16    | -1,28357 | 2,58E-07 |
| RBM26    | -1,28373 | 1,98E-06 |
| TBC1D20  | -1,28396 | 7,63E-06 |
| CEP295   | -1,28531 | 0,000868 |
| WDR54    | -1,28544 | 8,03E-06 |
| CAMK2D   | -1,28615 | 0,000655 |
| RTCA     | -1,28736 | 2,13E-06 |
| MCM6     | -1,29053 | 6,86E-08 |
| PRNP     | -1,29057 | 8,59E-05 |
| TAF5L    | -1,29075 | 9,49E-07 |
| RNF213   | -1,29268 | 0,000221 |
| SMIM10L1 | -1,29823 | 6,25E-07 |
| TAF5     | -1,29826 | 0,000228 |
| FBXW7    | -1,29866 | 1,19E-05 |
| TMEM201  | -1,29905 | 5,49E-05 |
| BTAF1    | -1,30128 | 3,17E-05 |
| ITSN2    | -1,30381 | 1,62E-05 |
| DOT1L    | -1,30572 | 5,96E-08 |
| BIN3     | -1,30725 | 0,000216 |

|           |          |          |
|-----------|----------|----------|
| ARHGAP19  | -1,30784 | 2,09E-05 |
| CEP97     | -1,30935 | 0,000187 |
| DSN1      | -1,31052 | 2,55E-06 |
| GNPTAB    | -1,31075 | 1,38E-08 |
| NOTCH1    | -1,31674 | 9,42E-10 |
| PTPN3     | -1,31682 | 6,15E-07 |
| TUBGCP5   | -1,31763 | 0,000269 |
| PHF6      | -1,32033 | 8,18E-06 |
| CSGALNAC  | -1,32086 | 0,000487 |
| TAZ       | -1,32226 | 0,000647 |
| TAF9B     | -1,32236 | 0,000712 |
| SUZ12     | -1,3224  | 2,04E-09 |
| TET1      | -1,3254  | 0,000164 |
| FTO       | -1,32665 | 5,57E-07 |
| TGFBR1    | -1,32685 | 1,05E-05 |
| POLD1     | -1,33006 | 2,14E-09 |
| HDAC1     | -1,33033 | 8,85E-10 |
| IGF2R     | -1,3318  | 2,84E-07 |
| TMEM123   | -1,33327 | 2,11E-10 |
| DBNL      | -1,33356 | 8,31E-05 |
| NCAPH2    | -1,3341  | 1,05E-08 |
| SEPT7     | -1,33479 | 1,84E-09 |
| PAFAH2    | -1,33631 | 7,69E-05 |
| ARRB2     | -1,33677 | 4,43E-08 |
| STK26     | -1,33774 | 2,71E-08 |
| HDHD1     | -1,3392  | 0,00046  |
| KLHL7     | -1,34163 | 0,000114 |
| PCMTD2    | -1,34424 | 0,000315 |
| MAP3K7    | -1,34687 | 6,51E-08 |
| ZAK       | -1,34795 | 4,44E-07 |
| JADE3     | -1,34935 | 3,56E-06 |
| HNRNPD    | -1,34943 | 5,82E-10 |
| DCAF11    | -1,34949 | 2,40E-05 |
| SUCLA2    | -1,35197 | 8,40E-07 |
| ERCC1     | -1,35506 | 6,38E-08 |
| TBRG1     | -1,35514 | 6,43E-05 |
| KRI1      | -1,35571 | 7,08E-10 |
| LINC00938 | -1,35719 | 0,000303 |
| ARHGEF1   | -1,35953 | 9,76E-10 |
| RBBP4     | -1,36079 | 9,39E-11 |
| POMGNT2   | -1,36093 | 0,000396 |
| CHAMP1    | -1,36269 | 9,20E-06 |
| CDK2      | -1,3641  | 4,75E-08 |
| TOPBP1    | -1,36472 | 1,07E-07 |
| CNST      | -1,36528 | 0,000758 |
| CWC25     | -1,36788 | 6,54E-05 |
| SPTAN1    | -1,36839 | 4,99E-07 |
| FAM49B    | -1,37053 | 1,06E-09 |
| NSL1      | -1,37129 | 5,06E-07 |
| HIPK2     | -1,37192 | 0,000406 |

|           |          |          |
|-----------|----------|----------|
| PYCR2     | -1,37436 | 5,28E-05 |
| USB1      | -1,37529 | 0,000199 |
| FBXO33    | -1,37582 | 0,000813 |
| SUV39H1   | -1,37635 | 1,78E-05 |
| TAPT1     | -1,37656 | 5,40E-06 |
| LGALS8    | -1,37697 | 8,67E-06 |
| TCP11L1   | -1,37802 | 0,000428 |
| GNPAT     | -1,38321 | 1,33E-06 |
| USP24     | -1,38334 | 2,03E-08 |
| ZFAT      | -1,38434 | 1,54E-05 |
| TRAM1     | -1,38498 | 1,97E-05 |
| PBX3      | -1,38522 | 2,06E-05 |
| CCNE2     | -1,38675 | 1,03E-06 |
| TLE1      | -1,38698 | 1,34E-06 |
| RRP7A     | -1,38727 | 4,03E-08 |
| LRRC20    | -1,39202 | 0,000975 |
| SPEN      | -1,39239 | 7,95E-07 |
| REV3L     | -1,39295 | 1,52E-06 |
| LYRM7     | -1,39305 | 2,09E-06 |
| UTP14C    | -1,39441 | 3,17E-05 |
| NISCH     | -1,39884 | 1,92E-06 |
| SDCCAG8   | -1,3995  | 0,000223 |
| PARP11    | -1,40089 | 0,000524 |
| TYK2      | -1,40204 | 2,87E-05 |
| AEBP2     | -1,40513 | 1,64E-05 |
| FNDC3A    | -1,4066  | 8,53E-07 |
| ADARB1    | -1,40661 | 1,85E-06 |
| SYNRG     | -1,4085  | 4,99E-06 |
| ZKSCAN2   | -1,41168 | 1,42E-05 |
| RPA1      | -1,41184 | 4,97E-10 |
| WEE1      | -1,41256 | 0,000533 |
| GIN3      | -1,41299 | 0,000402 |
| FAM126B   | -1,41486 | 0,000228 |
| SLFN5     | -1,4161  | 2,28E-05 |
| UBR1      | -1,41625 | 0,000622 |
| SSBP3     | -1,41759 | 4,13E-08 |
| TTK       | -1,41798 | 3,57E-08 |
| ZNF92     | -1,41917 | 3,28E-05 |
| VPS26B    | -1,41926 | 2,58E-06 |
| GABPA     | -1,41988 | 1,44E-05 |
| TBC1D2B   | -1,4209  | 1,24E-07 |
| DNAJC24   | -1,42093 | 0,000961 |
| NNT       | -1,4217  | 1,18E-07 |
| CTBP1-AS2 | -1,42308 | 2,43E-07 |
| FIGNL1    | -1,42503 | 2,73E-06 |
| HDAC7     | -1,42829 | 4,56E-10 |
| RBL2      | -1,42887 | 1,52E-06 |
| CARNMT1   | -1,43001 | 0,000193 |
| AMIGO2    | -1,43031 | 0,000397 |
| NUF2      | -1,43192 | 0,000223 |



|          |          |          |
|----------|----------|----------|
| ADCY7    | -1,43212 | 3,60E-05 |
| USP1     | -1,43217 | 6,12E-07 |
| JAK1     | -1,43286 | 2,46E-07 |
| LRP8     | -1,43452 | 3,33E-05 |
| BLOC1S6  | -1,43513 | 5,96E-08 |
| CAB39    | -1,43612 | 6,49E-10 |
| HIAT1    | -1,43842 | 2,07E-08 |
| RELT     | -1,4387  | 0,000432 |
| STK40    | -1,43973 | 1,78E-05 |
| IKBKB    | -1,44212 | 0,000183 |
| CD47     | -1,44281 | 1,08E-09 |
| SCML2    | -1,44292 | 0,000307 |
| ADRBK1   | -1,44664 | 7,57E-09 |
| C4orf46  | -1,44674 | 1,31E-05 |
| FAM117B  | -1,44693 | 2,81E-08 |
| PASK     | -1,4485  | 1,35E-05 |
| ZNF512B  | -1,45415 | 2,05E-06 |
| SDR39U1  | -1,4556  | 5,12E-06 |
| FAM195B  | -1,45704 | 0,000273 |
| RPIA     | -1,45761 | 1,43E-08 |
| SLX4     | -1,46259 | 5,21E-07 |
| DCP1A    | -1,46265 | 2,48E-05 |
| E2F8     | -1,46666 | 0,000614 |
| INSR     | -1,46809 | 0,000654 |
| YEATS2   | -1,46821 | 0,000395 |
| GOPC     | -1,46843 | 1,68E-07 |
| SKP2     | -1,46965 | 3,50E-11 |
| UBE2J1   | -1,46971 | 2,79E-09 |
| TBC1D10A | -1,47446 | 2,23E-06 |
| AIP      | -1,47471 | 1,67E-07 |
| DSCR3    | -1,47738 | 2,99E-07 |
| PPP2R1B  | -1,47832 | 7,43E-06 |
| RNGTT    | -1,48013 | 2,23E-08 |
| GBAS     | -1,48039 | 0,000933 |
| ARID5A   | -1,48084 | 0,00016  |
| CXorf38  | -1,48085 | 1,20E-05 |
| TMPO-AS1 | -1,48105 | 2,14E-05 |
| NEK7     | -1,48243 | 2,08E-07 |
| MMS22L   | -1,48374 | 1,51E-05 |
| DNA2     | -1,48576 | 2,57E-05 |
| KAT6B    | -1,48706 | 3,99E-10 |
| XPNPEP1  | -1,48715 | 1,85E-07 |
| PHIP     | -1,48794 | 5,11E-10 |
| MYO18A   | -1,48931 | 1,59E-05 |
| PRPF38A  | -1,48946 | 1,94E-11 |
| WDR7     | -1,49172 | 5,89E-07 |
| PFAS     | -1,49478 | 1,03E-09 |
| DHRS4L2  | -1,49487 | 2,83E-06 |
| ACOT7    | -1,49494 | 1,88E-06 |
| SPC24    | -1,49554 | 7,95E-07 |

|          |          |          |
|----------|----------|----------|
| CARHSP1  | -1,49567 | 8,57E-11 |
| IRAK1BP1 | -1,49624 | 0,000946 |
| PRAF2    | -1,4968  | 0,00021  |
| INPP4A   | -1,49728 | 6,09E-09 |
| CDADC1   | -1,50007 | 0,000909 |
| SNAP23   | -1,50105 | 2,41E-06 |
| NASP     | -1,50432 | 6,38E-12 |
| KIFAP3   | -1,50599 | 1,71E-05 |
| HSF2     | -1,50787 | 2,40E-06 |
| MED12    | -1,50859 | 4,33E-09 |
| POLE     | -1,51131 | 6,36E-10 |
| LNPEP    | -1,51289 | 2,16E-06 |
| AAK1     | -1,51367 | 2,39E-06 |
| PHF8     | -1,51676 | 2,04E-08 |
| PROSC    | -1,51739 | 1,18E-08 |
| APIP     | -1,51762 | 1,37E-08 |
| PHF11    | -1,51812 | 6,59E-05 |
| DMAP1    | -1,51925 | 7,94E-05 |
| NUDT21   | -1,51988 | 6,69E-12 |
| NUP50    | -1,52001 | 1,91E-10 |
| ZGPAT    | -1,5321  | 1,73E-07 |
| XRRA1    | -1,53276 | 1,57E-05 |
| CMIP     | -1,53289 | 4,01E-09 |
| XKR8     | -1,53354 | 0,000983 |
| SESTD1   | -1,53366 | 6,04E-06 |
| ZBTB44   | -1,53432 | 2,92E-07 |
| PCNXL2   | -1,53445 | 5,84E-06 |
| KDM5A    | -1,53733 | 3,57E-06 |
| ELOVL5   | -1,54034 | 1,66E-13 |
| GK5      | -1,5405  | 1,72E-07 |
| CTNBL1   | -1,54072 | 9,62E-10 |
| TMEM164  | -1,54154 | 1,15E-09 |
| TCFL5    | -1,54198 | 5,85E-06 |
| DEDD2    | -1,54216 | 2,09E-06 |
| ZBED6CL  | -1,54461 | 0,00041  |
| CKAP2L   | -1,54618 | 3,81E-05 |
| LPGAT1   | -1,54652 | 3,40E-09 |
| DR1      | -1,54769 | 9,95E-11 |
| MED14    | -1,54822 | 1,02E-10 |
| C21orf91 | -1,55051 | 2,81E-06 |
| RINL     | -1,55052 | 0,000359 |
| PANK2    | -1,55091 | 4,99E-08 |
| EPS15    | -1,55105 | 2,09E-09 |
| PXMP2    | -1,55473 | 1,27E-05 |
| PSMB10   | -1,55768 | 7,24E-06 |
| KIAA1551 | -1,55786 | 2,98E-11 |
| DUT      | -1,55841 | 2,03E-10 |
| HSPA13   | -1,56129 | 1,13E-09 |
| MBOAT1   | -1,5615  | 0,000396 |
| OSGEP    | -1,57036 | 9,36E-07 |

|           |          |          |
|-----------|----------|----------|
| LRRC40    | -1,57047 | 8,34E-08 |
| HP1BP3    | -1,57073 | 1,05E-05 |
| EYA3      | -1,57081 | 3,09E-09 |
| SMC2      | -1,57279 | 2,64E-09 |
| CFAP20    | -1,57339 | 1,39E-06 |
| SRSF4     | -1,57446 | 6,44E-10 |
| ARFRP1    | -1,57465 | 9,83E-11 |
| IFFO2     | -1,57515 | 6,39E-05 |
| SLC35E2B  | -1,57655 | 1,47E-11 |
| ATM       | -1,57675 | 0,000451 |
| PITPNM1   | -1,57738 | 2,36E-06 |
| FCHSD2    | -1,57938 | 8,18E-07 |
| TRPM2     | -1,57961 | 1,13E-06 |
| ASF1B     | -1,5816  | 5,27E-10 |
| RNF144A   | -1,58262 | 3,75E-06 |
| CRYBB2P1  | -1,58326 | 7,64E-05 |
| MAD2L2    | -1,58468 | 2,81E-05 |
| BUD13     | -1,58561 | 1,46E-06 |
| ATAD3B    | -1,58687 | 0,000455 |
| PSMD5-AS: | -1,587   | 6,59E-06 |
| H6PD      | -1,58831 | 4,71E-07 |
| S100PBP   | -1,59068 | 4,14E-06 |
| CENPP     | -1,59074 | 1,20E-05 |
| BLMH      | -1,59645 | 1,21E-09 |
| KIAA0754  | -1,59648 | 4,93E-05 |
| DGKD      | -1,59714 | 8,87E-07 |
| FGFR1     | -1,59947 | 4,80E-11 |
| NUP133    | -1,59998 | 4,21E-12 |
| CPNE1     | -1,60159 | 2,02E-12 |
| AGTPBP1   | -1,60331 | 2,86E-08 |
| SNX29     | -1,60372 | 0,000266 |
| SNRK      | -1,60436 | 3,80E-09 |
| MYO9B     | -1,60495 | 1,24E-07 |
| ZNF711    | -1,60573 | 0,000119 |
| EVL       | -1,60589 | 3,14E-10 |
| ZNF292    | -1,6065  | 2,06E-09 |
| TOE1      | -1,60733 | 2,87E-05 |
| LIMK2     | -1,60962 | 3,17E-07 |
| ARID1B    | -1,61049 | 2,16E-10 |
| TWF2      | -1,61081 | 1,02E-08 |
| ARFGEF1   | -1,61176 | 1,32E-10 |
| HACD1     | -1,61384 | 0,000272 |
| STXBP5    | -1,61416 | 9,29E-08 |
| FAM120C   | -1,6146  | 8,72E-06 |
| GID4      | -1,61811 | 3,78E-05 |
| CARS2     | -1,61846 | 2,15E-09 |
| ZNF549    | -1,62079 | 0,000689 |
| CCNDBP1   | -1,62106 | 9,38E-07 |
| TMEM110   | -1,6219  | 3,19E-05 |
| C21orf2   | -1,62391 | 2,26E-07 |

|          |          |          |
|----------|----------|----------|
| PIP4K2B  | -1,62527 | 3,64E-12 |
| CENPC    | -1,6293  | 2,37E-05 |
| TINF2    | -1,63042 | 3,40E-10 |
| TARBP1   | -1,63082 | 3,97E-05 |
| PDE7A    | -1,63504 | 3,11E-08 |
| SDE2     | -1,63617 | 0,000164 |
| TRNAU1AP | -1,63712 | 2,50E-06 |
| GNAI2    | -1,63716 | 1,64E-06 |
| CERK     | -1,63768 | 2,15E-05 |
| DIAPH3   | -1,63895 | 4,37E-05 |
| TMEM206  | -1,64326 | 0,000291 |
| NUP43    | -1,64857 | 2,41E-08 |
| PTPRA    | -1,6488  | 1,68E-09 |
| DYRK3    | -1,65013 | 0,000108 |
| PGBD5    | -1,65425 | 0,000491 |
| SHCBP1   | -1,6547  | 1,76E-11 |
| ETHE1    | -1,65575 | 5,50E-05 |
| IRF2     | -1,65769 | 2,80E-08 |
| GTF3C5   | -1,65971 | 4,53E-14 |
| SPRED2   | -1,6607  | 3,60E-12 |
| ESCO2    | -1,66125 | 6,78E-09 |
| SREBF2   | -1,66213 | 3,47E-13 |
| NGLY1    | -1,6625  | 1,31E-09 |
| ZNF462   | -1,66436 | 1,31E-06 |
| NDST2    | -1,66538 | 2,53E-08 |
| MED30    | -1,66543 | 2,32E-05 |
| TRAF3    | -1,66782 | 1,49E-11 |
| TGFB1    | -1,66797 | 3,84E-07 |
| CHFR     | -1,66851 | 1,29E-09 |
| ZNF101   | -1,66967 | 4,09E-08 |
| SLC23A2  | -1,66967 | 9,98E-09 |
| MAP2K6   | -1,67006 | 1,60E-06 |
| SLC36A4  | -1,67057 | 0,000119 |
| SNX25    | -1,67077 | 2,32E-05 |
| N4BP2    | -1,67331 | 1,69E-09 |
| ETV6     | -1,67726 | 2,82E-08 |
| GTPBP1   | -1,67729 | 1,37E-09 |
| UPRT     | -1,67784 | 0,000844 |
| MOB1B    | -1,67811 | 1,09E-06 |
| VPS39    | -1,67905 | 5,52E-10 |
| IL17RA   | -1,67911 | 1,05E-10 |
| MSI2     | -1,68096 | 2,77E-09 |
| KAT6A    | -1,68428 | 1,66E-11 |
| ARHGEF7  | -1,6884  | 1,90E-09 |
| FAM171A1 | -1,68921 | 5,65E-05 |
| FKBP5    | -1,69456 | 1,10E-10 |
| PTAR1    | -1,69465 | 1,20E-07 |
| SPOP     | -1,70112 | 7,61E-09 |
| RUFY3    | -1,70112 | 5,80E-09 |
| TMEM55A  | -1,70299 | 2,87E-05 |

|           |          |          |
|-----------|----------|----------|
| PSD4      | -1,70723 | 5,36E-10 |
| USP4      | -1,7098  | 1,51E-12 |
| ELF1      | -1,71044 | 1,48E-14 |
| ZNF70     | -1,7107  | 0,000781 |
| LINC00294 | -1,71091 | 0,000984 |
| TXLNA     | -1,71276 | 1,35E-08 |
| CBFB      | -1,71282 | 1,39E-11 |
| STK17A    | -1,71485 | 3,49E-09 |
| POLM      | -1,71505 | 4,41E-06 |
| KIAA1143  | -1,71633 | 4,09E-09 |
| KDM5C     | -1,71637 | 5,49E-16 |
| NFATC3    | -1,71644 | 1,63E-11 |
| METTL17   | -1,71785 | 3,57E-05 |
| SYNJ2     | -1,71891 | 3,50E-10 |
| PPM1F     | -1,71914 | 1,75E-05 |
| TBC1D1    | -1,72047 | 9,29E-08 |
| SGTB      | -1,72354 | 3,79E-05 |
| DTL       | -1,72358 | 4,42E-13 |
| SCAPER    | -1,72367 | 6,72E-05 |
| CRY1      | -1,72403 | 3,73E-10 |
| ZNF827    | -1,72404 | 0,000122 |
| CNTLN     | -1,72807 | 0,000168 |
| PCNXL4    | -1,72922 | 3,17E-13 |
| CRYZL1    | -1,72956 | 6,64E-06 |
| CCBL1     | -1,73069 | 0,00044  |
| EFHD2     | -1,73148 | 1,05E-08 |
| SCAI      | -1,73197 | 5,58E-07 |
| TLN1      | -1,73272 | 3,23E-09 |
| ARRDC1-AS | -1,73428 | 8,21E-06 |
| HMGCS1    | -1,73487 | 1,01E-08 |
| SCD5      | -1,73488 | 1,23E-09 |
| RCBTB1    | -1,73715 | 9,00E-07 |
| BDH2      | -1,73756 | 9,27E-05 |
| EPM2A     | -1,73892 | 0,000127 |
| AKAP17A   | -1,74251 | 1,67E-05 |
| ATP2B4    | -1,74336 | 5,69E-06 |
| PIN1      | -1,74541 | 4,11E-12 |
| RAD51AP1  | -1,74625 | 0,000379 |
| TCEANC2   | -1,74801 | 3,06E-06 |
| FBXO5     | -1,74853 | 3,75E-06 |
| MIR4442   | -1,74923 | 0,000998 |
| GNAQ      | -1,75047 | 8,28E-16 |
| KIF24     | -1,75772 | 7,86E-06 |
| PHC1      | -1,75986 | 3,97E-10 |
| LDAH      | -1,76145 | 3,10E-10 |
| KDELC1    | -1,76167 | 1,20E-05 |
| AGAP2     | -1,7653  | 1,16E-09 |
| NEU3      | -1,76603 | 4,62E-09 |
| COPS7B    | -1,76697 | 1,74E-11 |
| ATP9B     | -1,7672  | 3,89E-06 |

|           |          |          |
|-----------|----------|----------|
| RAD51D    | -1,76775 | 0,000174 |
| HAUS5     | -1,76803 | 2,40E-06 |
| RNF170    | -1,77203 | 1,07E-05 |
| SLC35A3   | -1,77262 | 1,45E-09 |
| PLEKHG4   | -1,77322 | 7,17E-05 |
| FDFT1     | -1,77552 | 1,89E-10 |
| ARL6IP6   | -1,77581 | 1,44E-05 |
| CTDSPL2   | -1,77672 | 5,41E-10 |
| IL4R      | -1,77733 | 0,000768 |
| RNF145    | -1,77798 | 1,57E-05 |
| ZNF589    | -1,77876 | 0,000542 |
| INAFM2    | -1,77996 | 0,000985 |
| ZNF792    | -1,77998 | 0,000474 |
| ORC1      | -1,78265 | 8,63E-10 |
| FBXO41    | -1,78273 | 5,88E-08 |
| PBRM1     | -1,78487 | 1,20E-16 |
| LIG4      | -1,78852 | 3,19E-09 |
| LINC00909 | -1,78873 | 0,000839 |
| DOPEY1    | -1,78929 | 8,66E-06 |
| THYN1     | -1,79044 | 2,01E-10 |
| CEP57     | -1,79111 | 6,52E-09 |
| CEP170    | -1,79451 | 2,62E-13 |
| STARD4    | -1,79487 | 8,22E-06 |
| KDELC2    | -1,79488 | 1,82E-10 |
| PHF19     | -1,79501 | 1,16E-13 |
| PPP1R3E   | -1,79592 | 0,000328 |
| KLF13     | -1,79751 | 3,26E-13 |
| RAD54L2   | -1,79766 | 6,09E-07 |
| C9orf40   | -1,79946 | 5,48E-09 |
| MANEA     | -1,80153 | 4,82E-06 |
| CLSPN     | -1,80425 | 6,66E-16 |
| SPTBN1    | -1,81    | 4,13E-16 |
| PEX6      | -1,81026 | 0,000831 |
| VAMP2     | -1,81039 | 1,53E-09 |
| RBL1      | -1,81122 | 3,33E-08 |
| STAU2     | -1,8141  | 1,60E-14 |
| SSFA2     | -1,81484 | 1,78E-11 |
| AFF1      | -1,81535 | 7,80E-11 |
| KLHL15    | -1,81707 | 3,60E-05 |
| TTF1      | -1,81781 | 6,40E-13 |
| ANKRD49   | -1,81853 | 3,65E-05 |
| LOC648987 | -1,81996 | 2,63E-05 |
| MTR       | -1,82195 | 1,35E-07 |
| SCP2      | -1,82373 | 2,52E-07 |
| LRRC14    | -1,82602 | 1,32E-09 |
| FAT1      | -1,82664 | 4,91E-09 |
| RAPGEF1   | -1,83175 | 2,48E-10 |
| SACM1L    | -1,83319 | 1,16E-09 |
| CCDC28A   | -1,83361 | 5,62E-05 |
| GPR180    | -1,83568 | 4,49E-08 |

|           |          |          |
|-----------|----------|----------|
| CEP152    | -1,8384  | 4,93E-05 |
| SHQ1      | -1,84056 | 5,13E-11 |
| PLEKHG2   | -1,84276 | 2,24E-13 |
| MAP7D1    | -1,84316 | 1,11E-10 |
| RICTOR    | -1,84539 | 2,09E-06 |
| CHAF1A    | -1,84692 | 1,53E-13 |
| FES       | -1,84793 | 0,000796 |
| BNIP3L    | -1,8486  | 2,15E-07 |
| LOC728743 | -1,84887 | 0,000349 |
| ZGRF1     | -1,85041 | 0,000481 |
| RRN3P3    | -1,85447 | 0,000958 |
| PDDC1     | -1,85573 | 3,01E-08 |
| PRPS2     | -1,85828 | 2,90E-10 |
| DHX35     | -1,86122 | 1,57E-06 |
| EPB41     | -1,86199 | 9,21E-13 |
| CDK19     | -1,86327 | 1,49E-11 |
| XYLT1     | -1,86461 | 2,95E-08 |
| ZNF486    | -1,8647  | 2,93E-07 |
| ZSCAN16-A | -1,86727 | 5,07E-05 |
| ARHGEF18  | -1,86763 | 3,50E-13 |
| SLC30A7   | -1,8681  | 3,82E-06 |
| TPP2      | -1,87137 | 6,32E-14 |
| MAP4K2    | -1,87331 | 5,42E-09 |
| TEX30     | -1,87721 | 4,58E-07 |
| SBF1      | -1,87768 | 2,10E-13 |
| C18orf54  | -1,8783  | 7,25E-08 |
| ENO2      | -1,87837 | 2,75E-07 |
| CASC5     | -1,88048 | 7,51E-16 |
| HIC2      | -1,88779 | 2,12E-05 |
| B4GALT5   | -1,88798 | 3,24E-15 |
| CLDND1    | -1,88853 | 2,40E-11 |
| CYTH1     | -1,88912 | 2,01E-10 |
| LEF1      | -1,8962  | 1,92E-10 |
| PDXP      | -1,89696 | 1,95E-10 |
| ZBED1     | -1,90243 | 3,99E-10 |
| MMD       | -1,90555 | 0,000646 |
| BUB1B     | -1,90805 | 2,90E-08 |
| HMGB2     | -1,90821 | 6,47E-08 |
| TMEM135   | -1,91293 | 1,06E-08 |
| NIN       | -1,91682 | 1,32E-15 |
| BCKDHB    | -1,91727 | 3,67E-07 |
| ARGLU1    | -1,91807 | 0,00029  |
| TBC1D4    | -1,91825 | 2,46E-05 |
| RANGRF    | -1,91875 | 8,64E-09 |
| PM20D2    | -1,91939 | 1,04E-07 |
| TCF19     | -1,9194  | 4,28E-16 |
| HDAC6     | -1,92    | 1,08E-10 |
| RAB8B     | -1,92098 | 7,56E-07 |
| GLS       | -1,92421 | 2,60E-07 |
| SNTA1     | -1,92479 | 1,30E-07 |

|           |          |          |
|-----------|----------|----------|
| PCNA      | -1,92534 | 1,32E-21 |
| ACSL4     | -1,92701 | 2,26E-10 |
| SENP7     | -1,93154 | 0,000215 |
| GTSE1     | -1,93163 | 2,30E-14 |
| CPOX      | -1,9325  | 5,96E-06 |
| SERGEF    | -1,93498 | 1,51E-06 |
| SYNGR1    | -1,93556 | 3,25E-05 |
| OCIAD2    | -1,93633 | 9,92E-11 |
| EPHX2     | -1,93691 | 2,25E-07 |
| SMC5      | -1,93879 | 6,80E-14 |
| ASIC1     | -1,94303 | 7,88E-05 |
| FAM169A   | -1,94533 | 0,000277 |
| BACH1     | -1,946   | 2,02E-09 |
| ME2       | -1,95335 | 9,77E-15 |
| MACF1     | -1,95336 | 9,62E-21 |
| SLC25A12  | -1,95583 | 1,59E-09 |
| HLA-C     | -1,95914 | 0,000451 |
| PCBP3     | -1,95935 | 3,16E-06 |
| KCNC4     | -1,96066 | 0,000104 |
| MYH10     | -1,96304 | 1,32E-14 |
| XRN1      | -1,96422 | 1,62E-07 |
| IFNAR2    | -1,96463 | 4,79E-09 |
| ANKRD10   | -1,96531 | 1,37E-07 |
| HOMER1    | -1,96886 | 2,48E-12 |
| MIER1     | -1,97182 | 5,42E-16 |
| LINC00641 | -1,97339 | 0,000492 |
| HBS1L     | -1,97525 | 8,79E-19 |
| NUPL2     | -1,97582 | 0,00053  |
| ABCB7     | -1,97644 | 1,73E-10 |
| FAM160B1  | -1,97661 | 1,20E-07 |
| ITPRIP    | -1,97845 | 0,000254 |
| ACOT8     | -1,97879 | 2,59E-07 |
| LOC730101 | -1,97893 | 5,13E-08 |
| FRG1      | -1,98428 | 4,85E-10 |
| FBXO4     | -1,98488 | 8,44E-05 |
| CEP135    | -1,98504 | 1,19E-05 |
| LOC100996 | -1,98674 | 2,51E-05 |
| LZTFL1    | -1,98698 | 3,86E-05 |
| KPNA5     | -1,99586 | 0,000203 |
| SLC27A1   | -1,99607 | 0,000103 |
| IRF1      | -1,99808 | 6,48E-08 |
| FABP5     | -1,99808 | 1,91E-18 |
| CHCHD7    | -2,00163 | 1,73E-08 |
| BTN2A1    | -2,00184 | 0,000247 |
| HBEGF     | -2,00271 | 0,000265 |
| ZNF141    | -2,00297 | 1,13E-05 |
| INPP5B    | -2,00469 | 2,23E-08 |
| SMYD3     | -2,00517 | 5,66E-07 |
| ZNF230    | -2,00568 | 0,000345 |
| DDX17     | -2,00581 | 2,15E-09 |



|          |          |          |
|----------|----------|----------|
| FBXL12   | -2,00621 | 4,18E-09 |
| MOB3A    | -2,00622 | 2,20E-13 |
| GLCCI1   | -2,00764 | 2,21E-10 |
| GGT7     | -2,00768 | 3,43E-05 |
| CEP128   | -2,0086  | 1,32E-13 |
| CEP85    | -2,01069 | 6,71E-07 |
| SASS6    | -2,01078 | 1,03E-05 |
| GRAMD4   | -2,01489 | 2,10E-06 |
| ZNF22    | -2,01513 | 1,23E-06 |
| CASP3    | -2,01811 | 9,44E-09 |
| EFCAB7   | -2,0184  | 0,000444 |
| ATP11B   | -2,01928 | 4,61E-19 |
| MAGEE1   | -2,02139 | 7,12E-05 |
| KIF15    | -2,02535 | 5,13E-09 |
| NIPAL3   | -2,03028 | 5,58E-06 |
| NPAT     | -2,0305  | 4,10E-12 |
| RAP1GDS1 | -2,03228 | 2,38E-16 |
| PCED1A   | -2,03399 | 4,75E-05 |
| TECPR1   | -2,03512 | 6,00E-11 |
| ECHDC1   | -2,03591 | 6,99E-11 |
| HECA     | -2,03649 | 2,12E-06 |
| MYCBP2   | -2,03878 | 4,43E-17 |
| ANO6     | -2,0419  | 1,93E-14 |
| ZNF37BP  | -2,04514 | 1,14E-05 |
| SZT2     | -2,0453  | 4,24E-10 |
| CASP8AP2 | -2,04577 | 1,21E-10 |
| RAD54L   | -2,04619 | 3,74E-11 |
| ABHD3    | -2,04712 | 1,59E-07 |
| PXYLP1   | -2,05    | 3,46E-10 |
| BICD1    | -2,05485 | 2,94E-10 |
| GNPDA2   | -2,05497 | 4,68E-05 |
| GBE1     | -2,05639 | 2,25E-11 |
| CDC25A   | -2,05653 | 6,24E-15 |
| SLC25A20 | -2,05795 | 2,12E-05 |
| PDE4D    | -2,05811 | 1,02E-13 |
| KIAA0922 | -2,0592  | 1,63E-07 |
| ABCD3    | -2,06012 | 4,63E-16 |
| ZNF493   | -2,06071 | 1,85E-06 |
| GATSL3   | -2,06844 | 0,000105 |
| SNX10    | -2,07064 | 1,18E-06 |
| PIDD1    | -2,07172 | 5,38E-10 |
| PCMTD1   | -2,07375 | 3,52E-07 |
| PTP4A2   | -2,07513 | 9,72E-19 |
| TRIM14   | -2,07574 | 6,46E-07 |
| SNHG3    | -2,07645 | 8,06E-07 |
| CENPW    | -2,08515 | 3,58E-10 |
| MCAM     | -2,08625 | 2,64E-05 |
| CHRNA1   | -2,0875  | 2,60E-05 |
| ASF1A    | -2,09366 | 5,57E-16 |
| ago-04   | -2,09585 | 4,15E-10 |

|            |          |          |
|------------|----------|----------|
| FBXO25     | -2,09659 | 3,71E-10 |
| NAB1       | -2,09676 | 1,76E-09 |
| ZCCHC3     | -2,09913 | 3,83E-11 |
| FADS3      | -2,10168 | 4,04E-14 |
| MCM8       | -2,10305 | 3,98E-16 |
| PAXIP1-AS2 | -2,10428 | 6,38E-05 |
| SLCO3A1    | -2,10606 | 3,95E-08 |
| CARD8      | -2,10729 | 1,47E-08 |
| CHD9       | -2,10751 | 3,97E-12 |
| ZSWIM3     | -2,10931 | 3,63E-05 |
| SLC35D1    | -2,11336 | 7,71E-11 |
| APOBEC3F   | -2,11378 | 0,000101 |
| ARL11      | -2,11417 | 0,000241 |
| TAF4B      | -2,11536 | 4,66E-08 |
| FMNL3      | -2,11788 | 3,08E-15 |
| STK4       | -2,12141 | 2,51E-21 |
| TTC7A      | -2,12182 | 4,43E-17 |
| SH3KBP1    | -2,12326 | 3,33E-09 |
| STK39      | -2,12467 | 3,38E-08 |
| POMK       | -2,12712 | 2,24E-05 |
| KAT2B      | -2,12754 | 2,83E-05 |
| TGFBR2     | -2,1283  | 2,09E-09 |
| ITPR1      | -2,1294  | 5,94E-10 |
| SMAP2      | -2,13244 | 6,28E-07 |
| LINC01128  | -2,13282 | 2,31E-06 |
| LOC100506  | -2,13547 | 0,000779 |
| SLC16A10   | -2,14504 | 2,89E-05 |
| EXOG       | -2,14545 | 0,00051  |
| PIP4K2A    | -2,15072 | 3,87E-20 |
| HSD17B11   | -2,15669 | 0,00012  |
| CRLF3      | -2,15716 | 5,46E-09 |
| NCAPD3     | -2,15774 | 3,03E-16 |
| DDIT4L     | -2,16205 | 5,21E-09 |
| CCSAP      | -2,16253 | 2,31E-10 |
| C15orf41   | -2,16454 | 6,07E-06 |
| ARFGAP1    | -2,16536 | 1,28E-23 |
| DCK        | -2,16569 | 4,07E-20 |
| USP51      | -2,16845 | 0,000231 |
| TTC38      | -2,16935 | 1,01E-09 |
| EPDR1      | -2,16992 | 1,60E-08 |
| SOBP       | -2,17274 | 9,74E-08 |
| UTRN       | -2,17282 | 7,76E-12 |
| PRKACB     | -2,17322 | 2,57E-15 |
| FADS1      | -2,17486 | 9,78E-13 |
| ABHD17B    | -2,17566 | 2,49E-15 |
| OGT        | -2,18163 | 4,76E-07 |
| ARID3A     | -2,1822  | 3,93E-05 |
| KATNB1     | -2,18385 | 3,99E-14 |
| MAPKBP1    | -2,18476 | 4,53E-08 |
| PLIN2      | -2,18684 | 9,12E-11 |

|           |          |          |
|-----------|----------|----------|
| SLC8B1    | -2,19132 | 3,09E-09 |
| GANC      | -2,19447 | 1,90E-07 |
| ULBP1     | -2,19478 | 0,000234 |
| TTC28     | -2,19631 | 1,15E-10 |
| ST6GALNA4 | -2,19836 | 6,37E-06 |
| SCN8A     | -2,20093 | 0,000318 |
| SEPT9     | -2,20114 | 3,49E-08 |
| WDR76     | -2,20286 | 3,75E-12 |
| ING5      | -2,20775 | 4,80E-08 |
| CD83      | -2,21055 | 1,38E-07 |
| SORL1     | -2,21198 | 6,34E-14 |
| USP11     | -2,21423 | 1,12E-14 |
| FAM111A   | -2,2162  | 4,10E-15 |
| LRRC37B   | -2,21836 | 1,36E-05 |
| CLCN6     | -2,21936 | 0,000161 |
| RP2       | -2,22212 | 2,16E-07 |
| FUZ       | -2,22311 | 7,79E-10 |
| FAF1      | -2,22427 | 4,07E-09 |
| IFI27L1   | -2,22802 | 7,35E-08 |
| ZNF853    | -2,23049 | 0,000287 |
| ATP1A3    | -2,23239 | 2,21E-06 |
| FAM69A    | -2,23591 | 0,000114 |
| ZNF605    | -2,23653 | 4,61E-06 |
| L3MBTL3   | -2,23819 | 8,08E-06 |
| NAPRT     | -2,23847 | 4,28E-07 |
| GPATCH11  | -2,23961 | 1,32E-09 |
| ICAM3     | -2,2414  | 2,66E-09 |
| CTSC      | -2,24186 | 1,42E-19 |
| BRWD3     | -2,2426  | 1,68E-06 |
| SLC10A7   | -2,24313 | 3,40E-06 |
| MGAT4A    | -2,2462  | 4,72E-14 |
| FNBP1     | -2,24913 | 5,51E-26 |
| CEP19     | -2,25108 | 1,14E-05 |
| CNTRL     | -2,25434 | 1,50E-09 |
| CD82      | -2,26336 | 1,71E-12 |
| CDS2      | -2,26615 | 1,36E-20 |
| RPL23AP53 | -2,2678  | 4,07E-09 |
| CYP2U1    | -2,27056 | 5,13E-07 |
| P3H1      | -2,27114 | 4,27E-14 |
| ZNF445    | -2,27258 | 2,12E-12 |
| HIVEP2    | -2,2764  | 9,85E-16 |
| TRAF5     | -2,27872 | 1,31E-07 |
| BMP2K     | -2,28189 | 2,92E-18 |
| SPIN4     | -2,28379 | 1,32E-07 |
| TREX1     | -2,2845  | 3,42E-06 |
| ECE1      | -2,28482 | 1,84E-17 |
| GNB4      | -2,28485 | 5,24E-13 |
| PAQR3     | -2,28546 | 2,99E-15 |
| RASSF2    | -2,28651 | 4,19E-07 |
| SARM1     | -2,29188 | 5,04E-09 |

|           |          |          |
|-----------|----------|----------|
| ATP8B2    | -2,29286 | 3,59E-13 |
| RAB9B     | -2,30237 | 2,42E-05 |
| LOC285074 | -2,30985 | 4,37E-05 |
| DNMBP     | -2,31715 | 8,03E-11 |
| RRAGD     | -2,31822 | 2,55E-08 |
| KCTD17    | -2,32285 | 1,22E-07 |
| ABCB10    | -2,32314 | 3,00E-14 |
| SNHG10    | -2,32429 | 1,68E-06 |
| SMC1A     | -2,32553 | 4,57E-23 |
| HSPB11    | -2,32741 | 1,87E-13 |
| ZNF772    | -2,3278  | 5,01E-12 |
| C11orf54  | -2,32797 | 5,91E-09 |
| ANKMY2    | -2,33538 | 1,55E-12 |
| RCBTB2    | -2,33659 | 3,12E-08 |
| PLCH1     | -2,33847 | 1,02E-26 |
| STMN1     | -2,33931 | 7,93E-13 |
| IL1RAP    | -2,33983 | 0,000242 |
| STRIP2    | -2,35091 | 0,000327 |
| TTC21B    | -2,35551 | 4,10E-11 |
| IKBKE     | -2,35803 | 3,84E-05 |
| FRG1HP    | -2,36334 | 8,78E-08 |
| SLC1A4    | -2,36352 | 2,02E-07 |
| RIN3      | -2,36612 | 2,94E-07 |
| AMIGO3    | -2,36993 | 1,18E-09 |
| CDK5RAP3  | -2,37364 | 6,44E-07 |
| ZMYM6NB   | -2,37378 | 3,16E-06 |
| TMEM170f  | -2,37499 | 5,46E-09 |
| SLC5A3    | -2,3752  | 6,64E-20 |
| PHF7      | -2,38154 | 2,46E-05 |
| GHDC      | -2,38324 | 1,15E-09 |
| CDPF1     | -2,38458 | 7,86E-07 |
| TUBGCP6   | -2,39237 | 6,27E-05 |
| TMX3      | -2,39607 | 4,60E-12 |
| CCDC15    | -2,40074 | 1,04E-05 |
| LOC101927 | -2,4008  | 0,000315 |
| DUSP7     | -2,4027  | 4,76E-08 |
| DACH1     | -2,40352 | 9,12E-09 |
| SPSB1     | -2,40356 | 1,91E-06 |
| ANKRD13A  | -2,40606 | 1,21E-10 |
| STS       | -2,41413 | 3,03E-10 |
| CCDC18    | -2,41695 | 2,29E-06 |
| RNPEPL1   | -2,42017 | 5,94E-14 |
| RB1       | -2,42272 | 4,23E-26 |
| CHST14    | -2,43201 | 1,68E-13 |
| TMEM106f  | -2,43448 | 1,67E-06 |
| APBA1     | -2,43609 | 1,34E-06 |
| RHOU      | -2,44075 | 1,44E-07 |
| TESC      | -2,44997 | 1,71E-06 |
| GK        | -2,45512 | 2,19E-10 |
| KCTD7     | -2,46367 | 3,49E-09 |

|             |          |          |
|-------------|----------|----------|
| CHM         | -2,46424 | 1,04E-07 |
| FAM135A     | -2,47272 | 6,69E-08 |
| ICA1L       | -2,47654 | 4,86E-07 |
| HACE1       | -2,48016 | 1,70E-08 |
| CARD8-AS1   | -2,49241 | 3,16E-05 |
| DGKE        | -2,4925  | 5,87E-11 |
| KIF13B      | -2,50098 | 1,05E-06 |
| C21orf58    | -2,50406 | 1,50E-06 |
| TNFAIP8     | -2,51081 | 5,14E-17 |
| ZNF512      | -2,51184 | 3,02E-20 |
| EMB         | -2,51364 | 5,27E-30 |
| TIGD7       | -2,51664 | 2,91E-08 |
| ZEB1-AS1    | -2,51723 | 4,58E-07 |
| PARP8       | -2,52021 | 5,02E-15 |
| TSPAN5      | -2,52241 | 9,22E-09 |
| CCDC109B    | -2,52278 | 9,05E-15 |
| EVI5L       | -2,52438 | 3,54E-10 |
| ADGRB2      | -2,531   | 4,16E-10 |
| PDE3B       | -2,53101 | 1,21E-17 |
| RBMS2       | -2,53444 | 1,64E-10 |
| ATHL1       | -2,54527 | 0,000405 |
| PLEKHM3     | -2,55103 | 1,22E-10 |
| SLAIN1      | -2,55208 | 3,08E-12 |
| MFGE8       | -2,56043 | 2,79E-16 |
| B3GNTL1     | -2,56382 | 2,30E-08 |
| ST3GAL3     | -2,56544 | 3,52E-10 |
| CPQ         | -2,56652 | 6,15E-05 |
| FCGBP       | -2,56666 | 0,000594 |
| SOCS1       | -2,58014 | 1,95E-16 |
| TRIM46      | -2,58275 | 0,000124 |
| GNG4        | -2,58353 | 8,94E-06 |
| CROCCP2     | -2,60057 | 0,000161 |
| SMIM3       | -2,60377 | 8,52E-18 |
| SYNJ1       | -2,60426 | 9,25E-10 |
| TTBK2       | -2,60723 | 1,09E-07 |
| PMAIP1      | -2,6088  | 2,18E-11 |
| KDM6A       | -2,61247 | 2,43E-17 |
| B2M         | -2,61596 | 1,03E-15 |
| TSHZ1       | -2,62332 | 6,88E-14 |
| NREP        | -2,62366 | 3,84E-14 |
| HOOK3       | -2,62429 | 1,84E-19 |
| TRAF3IP2-/- | -2,62588 | 4,61E-08 |
| C12orf75    | -2,63152 | 2,08E-25 |
| DPYSL2      | -2,63677 | 1,11E-16 |
| OGDHL       | -2,63738 | 1,10E-16 |
| DLG4        | -2,64065 | 1,72E-06 |
| NFATC1      | -2,64653 | 1,54E-16 |
| ARFGAP3     | -2,6499  | 7,31E-21 |
| PRKXP1      | -2,66407 | 0,000737 |
| RGS19       | -2,66425 | 2,17E-15 |

|           |          |          |
|-----------|----------|----------|
| NFATC2    | -2,67228 | 7,74E-13 |
| STAT5B    | -2,67592 | 5,18E-35 |
| C9orf9    | -2,68225 | 5,94E-06 |
| CLIP3     | -2,68322 | 5,27E-08 |
| MVB12B    | -2,68324 | 3,41E-19 |
| OXCT1     | -2,687   | 2,21E-28 |
| PLTP      | -2,68765 | 5,69E-06 |
| DIAPH2    | -2,69364 | 9,95E-18 |
| NEIL3     | -2,69575 | 2,18E-07 |
| SP4       | -2,69662 | 4,28E-10 |
| EXTL2     | -2,69834 | 3,58E-10 |
| LETM2     | -2,70049 | 0,000637 |
| USP49     | -2,70078 | 2,35E-14 |
| ANKH      | -2,70256 | 2,33E-23 |
| STIM1     | -2,70445 | 1,27E-30 |
| ACADM     | -2,70574 | 1,61E-30 |
| MFHAS1    | -2,70738 | 2,58E-25 |
| CAPG      | -2,7074  | 1,09E-20 |
| BIVM      | -2,71333 | 9,87E-07 |
| ARL4C     | -2,71854 | 1,38E-29 |
| RASA2     | -2,71936 | 6,67E-13 |
| ZNF155    | -2,72081 | 2,21E-06 |
| KCNQ5     | -2,73617 | 1,72E-06 |
| HIVEP3    | -2,73729 | 0,000143 |
| TTC33     | -2,74085 | 1,62E-15 |
| C20orf196 | -2,75092 | 3,46E-06 |
| NXPE3     | -2,7512  | 1,13E-07 |
| STMN3     | -2,75137 | 3,89E-32 |
| PLA2G6    | -2,75224 | 4,50E-07 |
| SEC14L2   | -2,75689 | 4,15E-08 |
| NDRG1     | -2,75874 | 4,83E-14 |
| TRIM47    | -2,76006 | 1,51E-11 |
| MTMR10    | -2,76289 | 3,01E-19 |
| GNAO1     | -2,76793 | 0,000774 |
| TRIB2     | -2,77108 | 5,39E-12 |
| TCF12     | -2,77647 | 4,11E-21 |
| MTF2      | -2,79508 | 1,86E-23 |
| PRKCH     | -2,79868 | 6,11E-21 |
| TFPI      | -2,79914 | 2,21E-06 |
| PPARA     | -2,80185 | 4,26E-17 |
| CNOT6L    | -2,80208 | 1,79E-33 |
| USP20     | -2,82465 | 1,51E-33 |
| RECK      | -2,82627 | 1,90E-05 |
| SLC12A4   | -2,82803 | 2,28E-05 |
| TMED8     | -2,83731 | 3,56E-11 |
| SERPINF1  | -2,8427  | 0,000253 |
| GALNT7    | -2,84775 | 7,33E-18 |
| CDON      | -2,84895 | 1,30E-08 |
| SSH2      | -2,85181 | 2,94E-25 |
| BAHCC1    | -2,85261 | 2,94E-11 |

|           |          |          |
|-----------|----------|----------|
| PGM1      | -2,85896 | 7,44E-16 |
| KHDC1     | -2,8624  | 4,72E-07 |
| PAK1      | -2,86593 | 4,49E-16 |
| SCMH1     | -2,90758 | 6,07E-10 |
| TYMS      | -2,91979 | 8,68E-40 |
| DUSP10    | -2,92028 | 2,96E-05 |
| SHPRH     | -2,92492 | 3,45E-15 |
| BZRAP1-AS | -2,9259  | 1,91E-07 |
| C19orf38  | -2,9329  | 0,000284 |
| ZNF880    | -2,93587 | 0,000691 |
| ZNF702P   | -2,93853 | 6,15E-06 |
| PELI1     | -2,94292 | 9,50E-09 |
| ITM2C     | -2,94339 | 9,50E-24 |
| ATAD5     | -2,94352 | 5,96E-12 |
| CD8A      | -2,94533 | 3,40E-21 |
| PRTFDC1   | -2,94605 | 3,17E-15 |
| ZNF81     | -2,95172 | 1,20E-08 |
| TERT      | -2,95801 | 1,94E-05 |
| NMI       | -2,95816 | 6,24E-13 |
| CHST7     | -2,9585  | 6,82E-08 |
| NMNAT3    | -2,96082 | 1,92E-06 |
| ARAP2     | -2,96665 | 7,31E-21 |
| CECR6     | -2,96895 | 5,50E-06 |
| SMCO4     | -2,96999 | 9,39E-09 |
| C16orf62  | -2,97054 | 2,27E-20 |
| CMTM1     | -2,97625 | 0,000548 |
| RNASEH2B  | -2,98084 | 5,27E-24 |
| FXYS5     | -2,98455 | 2,80E-21 |
| GPR63     | -2,9874  | 3,44E-07 |
| SLC2A3    | -2,99096 | 0,000304 |
| TSPYL4    | -2,99614 | 1,36E-26 |
| NEDD9     | -2,99836 | 0,0008   |
| ASRGL1    | -3,00722 | 2,18E-20 |
| ADAMTS17  | -3,00829 | 6,39E-11 |
| GCHFR     | -3,0125  | 1,42E-15 |
| PARP10    | -3,01556 | 1,15E-12 |
| ZNF266    | -3,01589 | 4,77E-09 |
| GALT      | -3,01734 | 2,55E-07 |
| RORC      | -3,02056 | 4,19E-11 |
| GSDMD     | -3,02338 | 3,19E-10 |
| LRRN1     | -3,02467 | 9,27E-16 |
| ARID3B    | -3,03179 | 1,93E-13 |
| ADAM10    | -3,03406 | 4,34E-44 |
| PPP2R3B   | -3,03492 | 1,34E-16 |
| TMEM8B    | -3,04595 | 2,10E-11 |
| UBALD2    | -3,04754 | 1,15E-11 |
| ZNF469    | -3,05418 | 0,000488 |
| CCND3     | -3,05863 | 1,10E-12 |
| YPEL1     | -3,05964 | 1,63E-10 |
| DDX60L    | -3,06131 | 9,63E-11 |

|            |          |          |
|------------|----------|----------|
| MICB       | -3,06669 | 1,73E-14 |
| CRACR2A    | -3,07558 | 1,58E-05 |
| PTK2B      | -3,09142 | 2,50E-22 |
| RIMS2      | -3,09194 | 1,03E-08 |
| LRRC37A4F  | -3,1114  | 1,25E-13 |
| GRK5       | -3,11563 | 6,54E-10 |
| SUSD1      | -3,11581 | 3,17E-22 |
| COCH       | -3,12045 | 7,76E-12 |
| ACO1       | -3,12542 | 1,81E-17 |
| BISPR      | -3,12851 | 5,95E-07 |
| RAPGEF5    | -3,1382  | 1,51E-11 |
| CHST11     | -3,13842 | 1,70E-25 |
| MAP10      | -3,14385 | 3,79E-12 |
| STK17B     | -3,15591 | 7,82E-31 |
| RPGR       | -3,15642 | 9,96E-07 |
| HLA-A      | -3,15955 | 1,69E-24 |
| CAPN10     | -3,1624  | 2,48E-15 |
| PPM1M      | -3,17095 | 1,17E-11 |
| CCDC82     | -3,18211 | 7,11E-11 |
| UHRF1      | -3,18507 | 8,48E-27 |
| AGPAT4     | -3,18977 | 3,08E-07 |
| ATL1       | -3,19255 | 8,76E-07 |
| KBTBD11    | -3,20539 | 4,19E-12 |
| LRP4       | -3,23683 | 3,46E-16 |
| DAAM2      | -3,23858 | 6,65E-12 |
| ZNF814     | -3,24084 | 2,46E-06 |
| SCCPDH     | -3,24415 | 1,02E-32 |
| NT5M       | -3,24474 | 8,62E-13 |
| SH2D2A     | -3,25295 | 4,72E-11 |
| OSBPL5     | -3,26237 | 6,68E-26 |
| CMTM7      | -3,26277 | 1,49E-12 |
| FLVCR1-AS1 | -3,26474 | 2,76E-06 |
| S100A4     | -3,26826 | 7,88E-16 |
| CDKN2C     | -3,26943 | 7,18E-41 |
| ANKRD36C   | -3,27534 | 8,03E-06 |
| LNP1       | -3,2792  | 1,51E-06 |
| CMTM3      | -3,28037 | 6,92E-17 |
| DLEU2      | -3,30933 | 2,93E-10 |
| DEF6       | -3,32196 | 3,60E-37 |
| JAK3       | -3,32226 | 2,08E-21 |
| CCDC28B    | -3,32284 | 4,53E-12 |
| CDCA7      | -3,32615 | 1,29E-15 |
| ARHGAP26   | -3,32915 | 4,23E-11 |
| TMSB4X     | -3,33258 | 1,04E-52 |
| DHX58      | -3,33331 | 9,45E-06 |
| ERG        | -3,34056 | 2,41E-22 |
| SLC25A42   | -3,35195 | 7,50E-20 |
| LOC283788  | -3,3541  | 2,17E-21 |
| ASB9       | -3,35693 | 0,000599 |
| PLEKHG1    | -3,35804 | 1,52E-28 |



|            |          |          |
|------------|----------|----------|
| ITGA5      | -3,36046 | 5,32E-17 |
| PIK3CD-AS1 | -3,36371 | 0,000329 |
| LINC00885  | -3,36659 | 1,14E-05 |
| AKNA       | -3,37456 | 8,36E-11 |
| RASA3      | -3,3803  | 1,61E-31 |
| HYI        | -3,38106 | 1,17E-14 |
| E2F2       | -3,38626 | 5,25E-16 |
| SYNE1      | -3,38898 | 3,52E-07 |
| SPRED1     | -3,391   | 6,13E-10 |
| CENPV      | -3,3995  | 1,82E-14 |
| SSBP2      | -3,40483 | 5,53E-13 |
| ASMTL-AS1  | -3,40977 | 0,000792 |
| CD109      | -3,40992 | 7,78E-13 |
| ABTB1      | -3,41246 | 0,000138 |
| SH2B3      | -3,4364  | 5,37E-29 |
| PPP1R1C    | -3,4473  | 2,75E-07 |
| RASL10B    | -3,4527  | 2,70E-18 |
| STXBP1     | -3,45593 | 1,30E-39 |
| SLC39A8    | -3,45787 | 2,34E-25 |
| VAMP1      | -3,46732 | 2,92E-05 |
| SIPA1      | -3,47322 | 1,36E-23 |
| GALNT2     | -3,47397 | 5,10E-55 |
| FNIP2      | -3,47572 | 6,83E-11 |
| SHANK1     | -3,47861 | 1,93E-13 |
| LINC01237  | -3,48208 | 6,46E-06 |
| SEMA4D     | -3,4905  | 1,30E-28 |
| HMHA1      | -3,4999  | 2,06E-45 |
| FILIP1L    | -3,50182 | 3,71E-13 |
| ARL17A     | -3,50532 | 0,000318 |
| ATP2A1     | -3,51295 | 0,000129 |
| GLIPR1     | -3,52251 | 8,59E-08 |
| NCR3LG1    | -3,52291 | 2,19E-13 |
| TPM2       | -3,53367 | 0,000761 |
| AMPD3      | -3,53694 | 3,67E-12 |
| GLIPR2     | -3,54218 | 7,05E-20 |
| UBE2L6     | -3,54825 | 4,27E-13 |
| LBR        | -3,55918 | 4,32E-52 |
| CSF1       | -3,56247 | 3,88E-12 |
| NUCB2      | -3,5701  | 4,23E-16 |
| RTTN       | -3,59243 | 1,25E-24 |
| C2orf48    | -3,61216 | 0,000143 |
| VAMP5      | -3,61898 | 2,37E-07 |
| APOL1      | -3,62088 | 0,000489 |
| FLT1       | -3,63444 | 0,00013  |
| PDCD4-AS1  | -3,63876 | 0,000844 |
| EDEM1      | -3,64173 | 1,16E-35 |
| PSMB8-AS1  | -3,64684 | 2,41E-05 |
| NOS3       | -3,66094 | 4,00E-06 |
| BEX4       | -3,66864 | 1,68E-25 |
| IFITM1     | -3,69719 | 5,61E-11 |

|           |          |          |
|-----------|----------|----------|
| DENND3    | -3,69793 | 7,22E-12 |
| CCDC136   | -3,70632 | 9,48E-16 |
| LINC01089 | -3,71035 | 1,21E-06 |
| HLA-B     | -3,71525 | 1,45E-14 |
| CD99      | -3,73517 | 1,42E-48 |
| HNRNPU-A  | -3,74447 | 3,80E-06 |
| FAM78A    | -3,75517 | 1,55E-18 |
| MICAL1    | -3,76056 | 3,25E-22 |
| WDR90     | -3,77962 | 5,32E-11 |
| LINC00342 | -3,78075 | 6,44E-06 |
| FYN       | -3,78849 | 3,31E-21 |
| BTBD11    | -3,79074 | 6,15E-30 |
| PITPNM2   | -3,80527 | 1,48E-36 |
| FLT3LG    | -3,81626 | 1,02E-09 |
| CXorf57   | -3,84244 | 1,73E-11 |
| FAM46A    | -3,84644 | 3,80E-22 |
| PALD1     | -3,85969 | 1,14E-20 |
| KIF7      | -3,86027 | 2,20E-05 |
| ACSS1     | -3,86345 | 2,13E-30 |
| MRC2      | -3,87086 | 2,79E-16 |
| CYFIP2    | -3,87613 | 2,82E-22 |
| PABPC4L   | -3,88365 | 9,57E-16 |
| HERC3     | -3,88479 | 1,53E-22 |
| GPRASP1   | -3,89178 | 1,04E-13 |
| EEPD1     | -3,90698 | 1,01E-10 |
| JAZF1     | -3,9105  | 2,37E-06 |
| ZNF513    | -3,91214 | 8,28E-08 |
| NKD2      | -3,9152  | 9,10E-52 |
| ERAP1     | -3,92329 | 7,44E-61 |
| STRA6     | -3,93638 | 1,65E-06 |
| SH3BGRL   | -3,94055 | 2,43E-42 |
| TIAM1     | -3,94555 | 7,92E-41 |
| RIMS3     | -3,96638 | 9,21E-21 |
| CEP85L    | -3,99088 | 2,46E-20 |
| TENM1     | -3,99241 | 1,20E-22 |
| LOC100506 | -3,99407 | 4,91E-14 |
| CORO2A    | -3,99887 | 5,45E-27 |
| C19orf66  | -4,00016 | 2,34E-11 |
| CD99P1    | -4,00326 | 1,64E-08 |
| ITGA6     | -4,00365 | 4,58E-48 |
| AKAP7     | -4,0075  | 4,92E-11 |
| RUNX1     | -4,01404 | 9,75E-88 |
| EML5      | -4,02025 | 2,92E-14 |
| SERHL2    | -4,02455 | 6,51E-11 |
| ZNF382    | -4,04748 | 3,57E-07 |
| VWCE      | -4,05377 | 3,79E-12 |
| AFF3      | -4,05676 | 9,45E-31 |
| VAV1      | -4,05769 | 1,80E-35 |
| CASP4     | -4,06011 | 0,000118 |
| GLRX      | -4,08297 | 5,99E-07 |

|           |          |           |
|-----------|----------|-----------|
| FUT4      | -4,0841  | 1,09E-28  |
| CUBN      | -4,09529 | 0,000579  |
| HHEX      | -4,09686 | 2,31E-19  |
| GPC3      | -4,10026 | 1,41E-10  |
| VIM-AS1   | -4,12408 | 6,82E-20  |
| RILPL2    | -4,14638 | 1,03E-17  |
| VPS13C    | -4,14953 | 4,67E-41  |
| PLCXD1    | -4,15417 | 5,77E-33  |
| STARD9    | -4,15821 | 1,57E-06  |
| PXK       | -4,17627 | 3,71E-17  |
| AKR1C3    | -4,18141 | 6,56E-05  |
| EMILIN2   | -4,18773 | 5,69E-11  |
| ELOVL4    | -4,19941 | 5,44E-20  |
| IL21R     | -4,21048 | 9,38E-08  |
| SH3TC1    | -4,22543 | 1,17E-33  |
| HERC2P3   | -4,22785 | 0,000262  |
| CCDC88A   | -4,23457 | 5,14E-73  |
| LYST      | -4,23688 | 2,87E-18  |
| GYG2      | -4,2369  | 3,21E-25  |
| LCP1      | -4,24531 | 1,42E-19  |
| KCNAB2    | -4,2556  | 1,91E-21  |
| PHEX      | -4,27477 | 2,19E-13  |
| KBTBD8    | -4,27582 | 1,98E-16  |
| RASA4CP   | -4,27779 | 4,59E-12  |
| CRYBG3    | -4,28148 | 6,88E-15  |
| FADS2     | -4,29014 | 7,52E-58  |
| CD72      | -4,29501 | 6,18E-10  |
| HTATSF1P2 | -4,29965 | 5,80E-22  |
| PLEKHA2   | -4,30502 | 2,10E-41  |
| ATP8A2    | -4,31613 | 4,71E-12  |
| RASA4     | -4,32075 | 8,55E-06  |
| GSDMB     | -4,32856 | 3,94E-05  |
| PIK3R5    | -4,33802 | 8,24E-15  |
| LRRC8C    | -4,35736 | 5,33E-30  |
| GXYLT2    | -4,35926 | 3,91E-28  |
| PCDH9     | -4,36357 | 1,39E-22  |
| TIMP2     | -4,37699 | 3,43E-61  |
| ATP8B3    | -4,37956 | 3,89E-06  |
| RASSF4    | -4,38643 | 5,74E-10  |
| SP100     | -4,3994  | 2,26E-08  |
| CAMK1D    | -4,42315 | 2,64E-61  |
| KLF12     | -4,43654 | 1,20E-58  |
| TFDP2     | -4,44433 | 2,09E-104 |
| CDKN2D    | -4,46812 | 7,74E-26  |
| BTN3A1    | -4,46945 | 1,28E-12  |
| INPP1     | -4,47337 | 1,73E-06  |
| CYP4V2    | -4,48817 | 1,12E-15  |
| ABHD8     | -4,49825 | 6,39E-10  |
| KIAA0226L | -4,52931 | 2,80E-09  |
| LEF1-AS1  | -4,53124 | 1,76E-13  |

|           |          |           |
|-----------|----------|-----------|
| B4GALT6   | -4,534   | 8,27E-63  |
| HDAC4     | -4,54226 | 1,35E-16  |
| TMBIM1    | -4,58144 | 1,58E-08  |
| BIRC3     | -4,5897  | 5,18E-10  |
| CACNA2D4  | -4,60328 | 6,40E-09  |
| CASC15    | -4,63398 | 3,80E-24  |
| ADRBK2    | -4,65225 | 4,16E-106 |
| FMNL1     | -4,65841 | 2,02E-65  |
| C6orf223  | -4,66099 | 3,63E-11  |
| BTN3A2    | -4,66907 | 4,76E-15  |
| ZNF264    | -4,67047 | 1,57E-38  |
| FAM63B    | -4,67775 | 6,52E-39  |
| TSPAN2    | -4,72599 | 1,53E-07  |
| APBB1     | -4,7297  | 8,97E-27  |
| TNF       | -4,75046 | 2,06E-05  |
| CTHRC1    | -4,75951 | 1,06E-20  |
| XAF1      | -4,76061 | 1,29E-07  |
| FBN1      | -4,76326 | 2,07E-26  |
| DOCK10    | -4,76673 | 1,13E-30  |
| BTN3A3    | -4,77232 | 9,79E-15  |
| STAMBPL1  | -4,80479 | 6,21E-21  |
| FHL1      | -4,82525 | 1,91E-34  |
| KHDRBS3   | -4,84202 | 8,98E-07  |
| DDX11L2   | -4,8448  | 4,25E-10  |
| ALDH2     | -4,84915 | 5,88E-14  |
| PPM1K     | -4,86257 | 7,61E-25  |
| ANKRD44   | -4,86409 | 2,86E-21  |
| TBXAS1    | -4,87119 | 1,29E-11  |
| MGC70870  | -4,87929 | 1,98E-12  |
| DOCK8     | -4,88175 | 2,48E-83  |
| ATP8A1    | -4,89456 | 1,27E-29  |
| GAS6-AS1  | -4,90875 | 8,32E-07  |
| SCN2A     | -4,90918 | 9,53E-05  |
| ANTXR2    | -4,93898 | 1,30E-08  |
| GRIK5     | -4,98473 | 1,88E-08  |
| CIB2      | -4,99883 | 1,18E-19  |
| PIK3CD    | -5,0101  | 1,98E-25  |
| CCDC69    | -5,01543 | 8,04E-32  |
| KCNAB3    | -5,01632 | 1,05E-05  |
| SEPT1     | -5,0164  | 2,39E-53  |
| BIN1      | -5,01738 | 3,96E-24  |
| HERC5     | -5,01863 | 6,98E-11  |
| RASSF5    | -5,02555 | 1,16E-31  |
| POU2AF1   | -5,04201 | 1,27E-05  |
| PCDHGB4   | -5,04603 | 3,66E-10  |
| ARHGAP23  | -5,05053 | 1,80E-28  |
| C14orf159 | -5,05211 | 2,84E-46  |
| CXCR4     | -5,06749 | 3,98E-103 |
| ARHGAP4   | -5,07293 | 4,35E-68  |
| GBP5      | -5,09952 | 7,01E-05  |

|           |          |          |
|-----------|----------|----------|
| BZRAP1    | -5,10605 | 0,000307 |
| MX2       | -5,10884 | 1,45E-36 |
| CMPK2     | -5,11585 | 1,96E-21 |
| PDE1B     | -5,1259  | 1,22E-05 |
| TRIM22    | -5,13336 | 1,32E-10 |
| GBP1      | -5,14345 | 7,08E-08 |
| C17orf51  | -5,15049 | 3,84E-32 |
| SARDH     | -5,16652 | 3,37E-21 |
| ST6GAL1   | -5,1697  | 1,64E-32 |
| CAMKV     | -5,17176 | 5,74E-06 |
| MAL       | -5,18713 | 2,42E-08 |
| SLFN11    | -5,1924  | 1,12E-61 |
| CPVL      | -5,19289 | 1,77E-17 |
| UBASH3B   | -5,21732 | 1,14E-46 |
| ZNF423    | -5,24534 | 1,14E-60 |
| TNFAIP2   | -5,2697  | 5,40E-13 |
| DPY19L2P2 | -5,28439 | 3,86E-16 |
| CHN2      | -5,29299 | 2,89E-06 |
| FGF9      | -5,30828 | 3,62E-05 |
| SATB1-AS1 | -5,3139  | 0,000576 |
| LIMD2     | -5,32093 | 4,11E-52 |
| PLCL1     | -5,32534 | 3,37E-38 |
| IL9R      | -5,32787 | 8,60E-17 |
| SPRY1     | -5,33491 | 1,16E-30 |
| FAM101B   | -5,34065 | 1,16E-68 |
| DLEU7-AS1 | -5,39343 | 3,22E-06 |
| FAM57B    | -5,40311 | 1,98E-11 |
| ST3GAL2   | -5,40332 | 7,06E-48 |
| MRVI1     | -5,40675 | 4,85E-06 |
| TAPBPL    | -5,42276 | 1,77E-30 |
| EPB41L2   | -5,4597  | 1,14E-99 |
| EMBP1     | -5,46074 | 4,96E-13 |
| ANGPTL6   | -5,48056 | 0,000339 |
| HMG5      | -5,54852 | 1,15E-05 |
| CCDC88B   | -5,59443 | 1,12E-50 |
| GSTM2     | -5,61639 | 0,000165 |
| YOD1      | -5,63311 | 7,77E-28 |
| MAP1A     | -5,63878 | 3,94E-29 |
| LIX1L     | -5,65442 | 2,57E-48 |
| SNPH      | -5,67097 | 7,21E-05 |
| SLC16A7   | -5,67365 | 1,84E-24 |
| LOC153684 | -5,67453 | 2,21E-08 |
| LINC01550 | -5,67864 | 5,67E-22 |
| LPAR6     | -5,69178 | 5,27E-08 |
| BCL2A1    | -5,69578 | 0,000796 |
| PURG      | -5,71041 | 0,000762 |
| TRANK1    | -5,71202 | 9,92E-22 |
| ACSL5     | -5,71792 | 6,31E-17 |
| NLRC5     | -5,72241 | 1,03E-26 |
| VIPR2     | -5,72621 | 4,27E-09 |

|           |          |           |
|-----------|----------|-----------|
| TSPY26P   | -5,76973 | 1,18E-07  |
| RGCC      | -5,77011 | 1,04E-23  |
| LOC729683 | -5,80152 | 5,31E-09  |
| RCAN1     | -5,80308 | 4,75E-88  |
| GRASP     | -5,80648 | 2,74E-05  |
| RAB32     | -5,80943 | 5,39E-40  |
| LIME1     | -5,83459 | 7,78E-28  |
| RASGRP2   | -5,83751 | 1,94E-22  |
| BST1      | -5,84102 | 3,43E-05  |
| ANGPT1    | -5,84202 | 6,68E-26  |
| DISP2     | -5,85209 | 0,000546  |
| AMN       | -5,85467 | 5,28E-05  |
| C1RL      | -5,87636 | 1,26E-06  |
| ZNF415    | -5,90183 | 6,82E-10  |
| SH2D3C    | -5,91933 | 6,68E-17  |
| DPP4      | -5,9195  | 5,32E-11  |
| HKDC1     | -5,92042 | 1,33E-05  |
| LPXN      | -5,92654 | 2,15E-107 |
| CLIP4     | -5,95834 | 7,38E-10  |
| MLLT11    | -5,96438 | 6,62E-63  |
| TTN       | -5,97401 | 0,000229  |
| CHRNA3    | -5,98608 | 9,05E-30  |
| MAPRE2    | -5,99349 | 1,26E-94  |
| KIAA2022  | -5,99523 | 3,66E-18  |
| RLTPR     | -6,00993 | 7,17E-130 |
| CORO6     | -6,01283 | 3,27E-07  |
| ZNF578    | -6,03105 | 2,89E-08  |
| N4BP2L1   | -6,0436  | 1,33E-14  |
| P2RY1     | -6,04498 | 0,000137  |
| NOG       | -6,05404 | 1,73E-14  |
| DCHS1     | -6,13467 | 2,70E-13  |
| TM6SF1    | -6,1371  | 1,13E-09  |
| ADGRF3    | -6,13724 | 8,21E-05  |
| RFTN1     | -6,14055 | 6,01E-63  |
| PRG4      | -6,15543 | 9,29E-08  |
| CCDC181   | -6,16689 | 4,04E-05  |
| IL16      | -6,20057 | 7,10E-48  |
| NXF3      | -6,20838 | 6,23E-05  |
| C10orf25  | -6,22139 | 6,43E-12  |
| CLEC11A   | -6,22761 | 8,09E-75  |
| ADA       | -6,23355 | 6,28E-91  |
| ANKLE1    | -6,24553 | 3,35E-12  |
| PAG1      | -6,32062 | 7,88E-97  |
| ZNF491    | -6,3388  | 2,48E-05  |
| IRGM      | -6,41358 | 1,64E-05  |
| SCARF1    | -6,43393 | 1,18E-13  |
| GJC2      | -6,43618 | 1,27E-05  |
| WAS       | -6,44393 | 1,41E-51  |
| SYT11     | -6,45142 | 7,10E-12  |
| RGPD3     | -6,45793 | 1,19E-17  |

|           |          |           |
|-----------|----------|-----------|
| CORO1A    | -6,47047 | 1,16E-81  |
| ACOT2     | -6,47556 | 1,44E-20  |
| SLC17A9   | -6,50119 | 5,10E-48  |
| TRPV2     | -6,51165 | 5,72E-29  |
| PTPN22    | -6,51691 | 9,18E-29  |
| HOXB3     | -6,52179 | 7,65E-07  |
| SELL      | -6,56372 | 3,94E-26  |
| ERVH48-1  | -6,56638 | 1,03E-17  |
| CDH23     | -6,57282 | 3,27E-22  |
| PDE6G     | -6,58461 | 8,37E-09  |
| HEMGN     | -6,59316 | 4,81E-06  |
| ZNF528    | -6,59463 | 7,55E-21  |
| NAP1L5    | -6,5964  | 8,62E-14  |
| IKZF2     | -6,62535 | 9,16E-44  |
| MYB       | -6,62718 | 2,68E-147 |
| LTB       | -6,62779 | 1,75E-06  |
| WIPF1     | -6,64048 | 2,06E-122 |
| SEPT6     | -6,64789 | 1,34E-66  |
| ARMCX4    | -6,64986 | 2,67E-11  |
| TMEM173   | -6,65136 | 8,57E-15  |
| LOC102723 | -6,65328 | 1,49E-07  |
| PSMB9     | -6,65636 | 2,69E-59  |
| MIR142    | -6,6641  | 2,24E-05  |
| DUSP6     | -6,67673 | 1,10E-05  |
| SYN1      | -6,71463 | 1,14E-26  |
| EPSTI1    | -6,71981 | 1,96E-06  |
| TRO       | -6,725   | 3,14E-13  |
| ITGA1     | -6,72903 | 0,000759  |
| ST3GAL6   | -6,73737 | 0,000674  |
| TRIM9     | -6,73835 | 1,85E-27  |
| HPGD      | -6,73851 | 3,25E-38  |
| TCF7      | -6,7396  | 1,30E-121 |
| FAM184A   | -6,744   | 5,36E-12  |
| NAP1L3    | -6,75209 | 2,46E-06  |
| ZDHHC2    | -6,79426 | 5,37E-48  |
| HOXB4     | -6,80821 | 3,26E-13  |
| APOL3     | -6,81041 | 4,90E-11  |
| CAMK4     | -6,82727 | 3,02E-45  |
| APOL6     | -6,84055 | 2,68E-61  |
| GPSM3     | -6,84544 | 2,73E-48  |
| FSTL1     | -6,85003 | 3,67E-42  |
| SLC18A2   | -6,85877 | 2,77E-31  |
| FLJ32255  | -6,87824 | 1,37E-13  |
| LINC00461 | -6,90615 | 0,000402  |
| ZNF844    | -6,90773 | 0,000353  |
| ACOT1     | -6,91377 | 0,000369  |
| KCNH8     | -6,92267 | 0,000345  |
| C1orf228  | -6,92587 | 1,30E-35  |
| CRIP1     | -6,93031 | 4,15E-95  |
| CASP10    | -6,93339 | 7,03E-32  |

|           |          |           |
|-----------|----------|-----------|
| ELMO1     | -6,94788 | 1,16E-51  |
| CDK6      | -6,94923 | 1,03E-50  |
| CCR7      | -6,95786 | 3,80E-23  |
| IL32      | -6,96093 | 1,66E-07  |
| SLC4A4    | -6,96288 | 3,65E-14  |
| STAG3     | -6,96447 | 1,53E-14  |
| SPOCK2    | -6,98012 | 1,98E-53  |
| TNFAIP3   | -6,98677 | 2,25E-88  |
| CD79A     | -7,02269 | 1,02E-22  |
| UGT3A2    | -7,04393 | 3,98E-07  |
| FAM129C   | -7,049   | 1,27E-21  |
| NLRP1     | -7,0963  | 0,00023   |
| LINC01138 | -7,10305 | 4,04E-07  |
| TRIM38    | -7,10401 | 0,000633  |
| SLC44A5   | -7,1238  | 0,000243  |
| EMP3      | -7,12503 | 1,18E-31  |
| DGKA      | -7,12607 | 3,62E-55  |
| PILRA     | -7,15482 | 0,000144  |
| GZMA      | -7,1625  | 7,25E-08  |
| CD79B     | -7,16712 | 6,37E-08  |
| TMEM156   | -7,19099 | 3,37E-08  |
| PTGDR2    | -7,20022 | 6,58E-08  |
| TNFRSF8   | -7,21166 | 4,20E-11  |
| AEBP1     | -7,24211 | 6,77E-112 |
| ANXA1     | -7,27196 | 2,92E-185 |
| ARHGEF6   | -7,33312 | 6,64E-124 |
| DPEP1     | -7,3369  | 6,83E-08  |
| RUNX3     | -7,34963 | 6,82E-15  |
| OSBPL3    | -7,37791 | 1,66E-35  |
| DBH-AS1   | -7,39007 | 3,67E-15  |
| JAKMIP2   | -7,40171 | 1,98E-08  |
| JAG2      | -7,40786 | 0,000642  |
| P3H3      | -7,42432 | 2,91E-18  |
| FERMT3    | -7,42477 | 7,63E-87  |
| LINC01260 | -7,42839 | 9,14E-09  |
| GFI1      | -7,44434 | 1,57E-40  |
| PNMA2     | -7,465   | 4,08E-62  |
| BIN2      | -7,47256 | 1,39E-57  |
| NEK9      | -7,47431 | 1,10E-05  |
| CDH2      | -7,50339 | 3,25E-60  |
| GZMM      | -7,50561 | 4,66E-09  |
| HCST      | -7,5097  | 9,71E-20  |
| C2orf88   | -7,51707 | 3,01E-05  |
| TP73-AS1  | -7,52842 | 0,000534  |
| CSTF3-AS1 | -7,52988 | 0,000953  |
| PLAG1     | -7,54023 | 2,49E-12  |
| KCNC2     | -7,54049 | 0,000945  |
| RGL4      | -7,55927 | 3,52E-09  |
| IL12RB2   | -7,56389 | 0,000866  |
| PCDH10    | -7,56626 | 1,20E-44  |



|           |          |           |
|-----------|----------|-----------|
| HEPACAM   | -7,57912 | 0,001007  |
| C10orf54  | -7,58581 | 1,59E-27  |
| GCNT4     | -7,58775 | 0,000889  |
| CCDC26    | -7,59412 | 2,34E-05  |
| MICU3     | -7,59699 | 0,000945  |
| ETV5      | -7,59886 | 6,26E-94  |
| ARHGAP19  | -7,60548 | 0,001015  |
| SLC1A7    | -7,62575 | 0,000647  |
| MLC1      | -7,63698 | 1,79E-05  |
| LOC403323 | -7,64199 | 2,37E-05  |
| CRYGN     | -7,65759 | 0,000574  |
| ADAMTSL2  | -7,66059 | 0,000563  |
| ZNF683    | -7,66431 | 0,000586  |
| HIST1H3C  | -7,67918 | 0,000528  |
| CCR8      | -7,69898 | 0,000478  |
| NBAT1     | -7,70044 | 0,000486  |
| LOC101925 | -7,7149  | 0,000486  |
| ZNF426    | -7,71524 | 1,55E-20  |
| SV2A      | -7,72357 | 4,41E-77  |
| C16orf86  | -7,7494  | 0,000741  |
| C3AR1     | -7,75054 | 0,000417  |
| HVCN1     | -7,76313 | 5,28E-10  |
| DYNAP     | -7,77423 | 0,000355  |
| LOC728024 | -7,78043 | 0,000346  |
| ZBTB18    | -7,7809  | 5,79E-57  |
| ZNF826P   | -7,78385 | 0,000367  |
| LOC100505 | -7,80175 | 8,31E-18  |
| ZNF788    | -7,81322 | 2,31E-14  |
| LOC100996 | -7,84114 | 0,000284  |
| REC8      | -7,84563 | 2,02E-52  |
| SMO       | -7,84977 | 4,50E-14  |
| FBLN7     | -7,86534 | 0,000238  |
| TUSC5     | -7,86988 | 0,000222  |
| DFNA5     | -7,87053 | 0,000227  |
| LOC100130 | -7,87633 | 0,000233  |
| RGPD4     | -7,89523 | 5,64E-06  |
| C11orf96  | -7,9013  | 0,000233  |
| ZNF655    | -7,90359 | 0,000758  |
| LOC101925 | -7,92138 | 0,000176  |
| TMEM26    | -7,9276  | 0,000182  |
| LOC101925 | -7,93133 | 0,000176  |
| ZNF677    | -7,94118 | 0,000192  |
| PTPRCAP   | -7,95739 | 1,42E-109 |
| GOLGA8N   | -7,99499 | 6,83E-15  |
| TNFSF10   | -8,00036 | 3,76E-06  |
| PON1      | -8,00043 | 0,000153  |
| CHRNA9    | -8,00334 | 0,000136  |
| NPR2      | -8,02269 | 2,52E-05  |
| LOC439933 | -8,02847 | 0,000109  |
| PELI2     | -8,03405 | 8,69E-08  |

|           |          |           |
|-----------|----------|-----------|
| LAT       | -8,04437 | 6,06E-08  |
| TTC16     | -8,04977 | 4,21E-06  |
| RASGRP1   | -8,06125 | 3,93E-148 |
| LGALS9    | -8,06746 | 2,03E-49  |
| ANTXRPL1  | -8,07013 | 0,00011   |
| EGFR      | -8,07405 | 8,71E-05  |
| LIPE      | -8,07562 | 3,74E-11  |
| F13A1     | -8,07976 | 9,60E-05  |
| ILDR2     | -8,08028 | 3,70E-33  |
| GP5       | -8,09863 | 2,36E-06  |
| ARHGAP9   | -8,10131 | 2,72E-27  |
| RFX8      | -8,12367 | 0,000102  |
| LOC100505 | -8,13741 | 8,31E-05  |
| FAM27E3   | -8,13868 | 0,000114  |
| GBGT1     | -8,14599 | 0,000177  |
| FAM163B   | -8,16661 | 5,53E-05  |
| LDLRAD4   | -8,16767 | 3,19E-75  |
| CARD16    | -8,17346 | 5,88E-05  |
| LINC01221 | -8,18077 | 5,26E-05  |
| GJC1      | -8,18324 | 4,83E-21  |
| SLAMF6    | -8,20932 | 1,02E-11  |
| LINC00884 | -8,20973 | 5,30E-05  |
| MPP1      | -8,22573 | 1,08E-83  |
| CFTR      | -8,22597 | 4,07E-05  |
| LINC00920 | -8,24256 | 3,92E-05  |
| GBP3      | -8,24627 | 2,25E-06  |
| ACAP1     | -8,2535  | 2,05E-82  |
| CFP       | -8,27017 | 1,01E-06  |
| RTP5      | -8,27076 | 3,61E-05  |
| TAGAP     | -8,27142 | 5,07E-05  |
| NPTX2     | -8,27176 | 3,25E-05  |
| ARHGDIB   | -8,27433 | 3,52E-07  |
| HAR1A     | -8,27853 | 4,07E-05  |
| PCSK5     | -8,28099 | 1,26E-21  |
| ZNF439    | -8,29237 | 2,38E-11  |
| TNNT3     | -8,29989 | 2,83E-05  |
| C20orf203 | -8,33031 | 2,43E-05  |
| RAB38     | -8,33179 | 3,11E-05  |
| MEI1      | -8,34205 | 2,58E-05  |
| ERAP2     | -8,34441 | 3,16E-96  |
| ACSL6     | -8,3471  | 5,32E-05  |
| ZNF626    | -8,34807 | 2,38E-05  |
| ST6GALNA4 | -8,35317 | 2,43E-05  |
| LINC01225 | -8,35938 | 3,99E-05  |
| SNORD116  | -8,37655 | 2,41E-05  |
| PLCL2     | -8,38084 | 1,33E-27  |
| LINC00689 | -8,3825  | 6,36E-07  |
| GLP1R     | -8,38373 | 2,86E-05  |
| ARHGAP31  | -8,3943  | 8,35E-07  |
| LOC100506 | -8,40234 | 1,83E-32  |

|            |          |          |
|------------|----------|----------|
| DENND1C    | -8,40256 | 3,85E-50 |
| SLIT1      | -8,41561 | 1,55E-10 |
| CDO1       | -8,41614 | 1,69E-05 |
| CD7        | -8,41872 | 1,27E-56 |
| LINC01096  | -8,4548  | 2,08E-05 |
| SOGA3      | -8,46285 | 3,05E-26 |
| TIE1       | -8,47096 | 1,34E-05 |
| IL2RB      | -8,47479 | 3,82E-07 |
| NCR3       | -8,48375 | 1,43E-05 |
| RASGRP4    | -8,48453 | 1,08E-05 |
| POU3F2     | -8,487   | 1,95E-23 |
| MAB21L1    | -8,49925 | 1,01E-05 |
| LCN10      | -8,50512 | 1,13E-05 |
| LINC00526  | -8,50865 | 1,64E-05 |
| LOC100379  | -8,52002 | 9,38E-06 |
| CACNA1C-/- | -8,52813 | 1,27E-05 |
| APOBEC3C   | -8,53932 | 4,50E-38 |
| TSIX       | -8,54946 | 9,39E-05 |
| HMHB1      | -8,55184 | 7,84E-06 |
| VILL       | -8,55828 | 1,04E-18 |
| CD52       | -8,56393 | 3,09E-13 |
| SCN9A      | -8,57572 | 3,92E-13 |
| PWARSN     | -8,58138 | 6,48E-06 |
| ZEB1       | -8,58575 | 5,30E-82 |
| DGKG       | -8,58763 | 2,75E-13 |
| SRGN       | -8,61781 | 1,88E-07 |
| GLB1L3     | -8,62726 | 5,90E-06 |
| STAT5A     | -8,6404  | 1,88E-08 |
| RGS18      | -8,65309 | 4,57E-06 |
| CD244      | -8,66292 | 5,74E-06 |
| RORB       | -8,66667 | 1,32E-13 |
| ABCA13     | -8,66955 | 4,05E-06 |
| RTP4       | -8,67553 | 4,91E-06 |
| TFCP2      | -8,68924 | 4,65E-05 |
| PRF1       | -8,68949 | 3,72E-06 |
| TNFRSF14   | -8,6933  | 1,99E-13 |
| LOC101927  | -8,69498 | 3,57E-06 |
| LSAMP      | -8,69753 | 3,46E-06 |
| CELF2-AS1  | -8,70697 | 3,68E-06 |
| IFFO1      | -8,71538 | 1,56E-18 |
| MYO18B     | -8,7218  | 3,76E-06 |
| NLRC3      | -8,73399 | 4,41E-05 |
| SLC23A1    | -8,73557 | 2,27E-05 |
| KIRREL2    | -8,74121 | 6,47E-14 |
| LOC101926  | -8,74204 | 3,08E-06 |
| FGF17      | -8,74277 | 2,73E-06 |
| POU4F1     | -8,74453 | 2,78E-06 |
| C2orf40    | -8,74595 | 2,91E-06 |
| LCT        | -8,74632 | 7,85E-14 |
| IQGAP2     | -8,75158 | 4,19E-65 |

|           |          |           |
|-----------|----------|-----------|
| SCG2      | -8,75543 | 2,53E-06  |
| MDFIC     | -8,75573 | 6,70E-20  |
| BATF3     | -8,78296 | 8,40E-08  |
| MAP4K1    | -8,80934 | 4,06E-69  |
| BEND4     | -8,82189 | 3,15E-14  |
| FAM27B    | -8,85132 | 1,50E-06  |
| GIMAP1    | -8,85438 | 2,75E-06  |
| ABI3      | -8,85869 | 2,79E-14  |
| TMC8      | -8,90569 | 5,17E-88  |
| REG4      | -8,92947 | 1,07E-06  |
| C2CD2     | -8,93404 | 1,33E-06  |
| GRAP      | -8,9381  | 5,54E-21  |
| EPHB6     | -8,95376 | 1,29E-239 |
| DAPK1     | -8,97324 | 5,73E-64  |
| LOC101928 | -8,98436 | 8,72E-07  |
| TSLP      | -8,9858  | 7,65E-07  |
| CCL28     | -8,98728 | 8,04E-07  |
| SLC40A1   | -8,99903 | 4,00E-05  |
| TSKS      | -9,01301 | 6,71E-07  |
| WT1-AS    | -9,03021 | 5,65E-07  |
| PSMA8     | -9,04347 | 5,29E-07  |
| FGF14-AS2 | -9,04892 | 4,91E-07  |
| GCSAM     | -9,05177 | 5,02E-07  |
| GOLGA8O   | -9,11564 | 7,53E-07  |
| ZNF577    | -9,11615 | 1,31E-06  |
| LY75      | -9,1219  | 7,36E-07  |
| KRT1      | -9,12414 | 3,89E-07  |
| CXCR3     | -9,14626 | 3,85E-07  |
| FGD5      | -9,14948 | 3,99E-07  |
| LINC00654 | -9,16369 | 2,99E-07  |
| NEXN      | -9,16889 | 1,33E-22  |
| RUNX1T1   | -9,17002 | 2,70E-07  |
| SLC38A5   | -9,17633 | 4,43E-55  |
| ZNF831    | -9,18129 | 2,31E-07  |
| CCRL2     | -9,19274 | 2,43E-07  |
| NID2      | -9,19343 | 2,91E-07  |
| MZB1      | -9,19831 | 4,26E-116 |
| SLFN12    | -9,20091 | 2,74E-07  |
| ZP1       | -9,20765 | 2,10E-07  |
| LINC01163 | -9,2138  | 6,19E-07  |
| NDST3     | -9,23239 | 1,05E-08  |
| RAB33A    | -9,25334 | 2,08E-07  |
| PECAM1    | -9,28149 | 8,03E-23  |
| ZNF528-AS | -9,28581 | 1,78E-07  |
| VIM       | -9,28586 | 8,07E-200 |
| ADAMTS10  | -9,29014 | 3,13E-07  |
| PWAR5     | -9,29225 | 2,17E-07  |
| C1RL-AS1  | -9,29275 | 3,40E-07  |
| CACNA1C-1 | -9,29455 | 2,72E-07  |
| ATCAY     | -9,29974 | 2,82E-07  |

|           |          |          |
|-----------|----------|----------|
| TRG-AS1   | -9,31304 | 1,15E-07 |
| ZNF521    | -9,31956 | 2,66E-30 |
| ZNF69     | -9,32466 | 1,00E-07 |
| SPTA1     | -9,32773 | 1,01E-07 |
| CCDC141   | -9,33504 | 1,09E-07 |
| PIK3R6    | -9,34156 | 9,84E-08 |
| ZNF71     | -9,34831 | 3,58E-16 |
| C1orf186  | -9,36793 | 7,93E-08 |
| ITGB2     | -9,37181 | 9,59E-96 |
| CST7      | -9,37182 | 7,69E-08 |
| GNGT2     | -9,3741  | 7,51E-08 |
| AFF2      | -9,37614 | 5,91E-06 |
| PCAT18    | -9,38229 | 7,21E-08 |
| TMEM25    | -9,39153 | 8,05E-08 |
| XPNPEP2   | -9,40055 | 6,51E-08 |
| AKR1B1    | -9,40177 | 4,40E-43 |
| IL12RB1   | -9,41171 | 6,09E-08 |
| ICAM4     | -9,44134 | 1,33E-07 |
| MAP3K7CL  | -9,45182 | 5,09E-08 |
| CLEC2B    | -9,45507 | 4,71E-08 |
| SPARC     | -9,47116 | 4,28E-08 |
| MYO7B     | -9,5026  | 3,55E-08 |
| ZDHHC15   | -9,54599 | 2,90E-08 |
| TMEM71    | -9,56369 | 2,53E-08 |
| STAP1     | -9,56711 | 2,69E-08 |
| BLK       | -9,57306 | 2,35E-08 |
| ITGB2-AS1 | -9,57619 | 2,77E-07 |
| CECR1     | -9,58493 | 1,97E-32 |
| TLX2      | -9,59496 | 2,06E-08 |
| THSD7B    | -9,60378 | 2,34E-08 |
| TMEM204   | -9,60591 | 2,22E-08 |
| JAG1      | -9,61339 | 1,91E-08 |
| SELPLG    | -9,63877 | 2,44E-32 |
| NEGR1     | -9,64535 | 1,65E-08 |
| ZNF583    | -9,6563  | 1,50E-08 |
| C14orf39  | -9,67396 | 5,22E-08 |
| PTGDR     | -9,68597 | 1,40E-08 |
| LOC100996 | -9,6881  | 9,43E-10 |
| LRRC34    | -9,69416 | 2,44E-08 |
| TNFSF14   | -9,70117 | 1,14E-08 |
| LY6H      | -9,71909 | 1,09E-08 |
| NPM2      | -9,72733 | 1,03E-08 |
| LINC01226 | -9,74208 | 5,54E-08 |
| LOC101927 | -9,76765 | 7,52E-09 |
| C11orf21  | -9,77981 | 1,03E-08 |
| HSF5      | -9,81202 | 7,47E-09 |
| DTX1      | -9,8258  | 7,56E-09 |
| MYOM2     | -9,83119 | 5,02E-09 |
| LOC100130 | -9,84213 | 5,03E-10 |
| PTCRA     | -9,84961 | 6,28E-09 |

|            |          |           |
|------------|----------|-----------|
| PLCB2      | -9,85368 | 2,02E-26  |
| SMPD3      | -9,86019 | 3,46E-127 |
| ZC3H12B    | -9,86824 | 4,56E-09  |
| ZNF135     | -9,88403 | 4,18E-09  |
| LOC63930   | -9,89791 | 3,76E-09  |
| LOC101927  | -9,91501 | 3,60E-09  |
| LBH        | -9,91661 | 6,37E-19  |
| SLFN13     | -9,93552 | 2,71E-09  |
| RNASE6     | -9,94242 | 3,72E-09  |
| LRMP       | -9,95452 | 3,81E-35  |
| PNMAL1     | -9,95808 | 2,37E-09  |
| SLC35G2    | -9,98375 | 2,19E-09  |
| LIPC       | -9,9955  | 1,92E-09  |
| ZC4H2      | -10,0086 | 2,21E-19  |
| MYT1L      | -10,0144 | 3,45E-09  |
| ADAMTS1    | -10,0197 | 2,63E-10  |
| LINC01366  | -10,0257 | 1,56E-09  |
| AGPS       | -10,031  | 1,27E-59  |
| GSTP1      | -10,031  | 1,95E-106 |
| RIMBP3     | -10,0335 | 1,92E-09  |
| CD226      | -10,0412 | 1,51E-09  |
| SLC32A1    | -10,05   | 1,67E-09  |
| GRAMD1B    | -10,0519 | 1,38E-09  |
| ZNF665     | -10,0522 | 1,53E-09  |
| SLC43A3    | -10,0532 | 2,53E-05  |
| ZNF154     | -10,0609 | 2,63E-09  |
| ARHGAP30   | -10,0799 | 6,50E-79  |
| ZNF660     | -10,0911 | 1,29E-09  |
| PODN       | -10,1065 | 1,09E-09  |
| GIMAP7     | -10,1076 | 9,92E-10  |
| LY9        | -10,116  | 1,08E-09  |
| PRDM8      | -10,1284 | 9,90E-10  |
| RGPD1      | -10,1362 | 9,00E-10  |
| ST6GALNA4  | -10,1431 | 8,64E-10  |
| GVINP1     | -10,1518 | 8,27E-10  |
| HACD4      | -10,1689 | 8,97E-10  |
| GNA15      | -10,1708 | 1,93E-56  |
| LDHB       | -10,1753 | 0,000514  |
| RRN3P1     | -10,1815 | 1,96E-08  |
| SNX20      | -10,1947 | 6,69E-10  |
| RAB44      | -10,2035 | 6,83E-10  |
| PCED1B-AS1 | -10,2038 | 6,13E-10  |
| IGF2BP3    | -10,2079 | 5,49E-10  |
| C20orf197  | -10,2089 | 6,07E-10  |
| ST18       | -10,2252 | 5,27E-10  |
| LST1       | -10,2255 | 4,87E-10  |
| GPR65      | -10,2266 | 4,69E-10  |
| CD27       | -10,2322 | 4,81E-10  |
| ZNF501     | -10,2623 | 3,94E-10  |
| CD1D       | -10,2714 | 5,17E-28  |

|           |          |          |
|-----------|----------|----------|
| ZNF470    | -10,2781 | 3,82E-10 |
| FRG1CP    | -10,295  | 3,11E-10 |
| MME       | -10,3115 | 7,68E-10 |
| NRROS     | -10,319  | 3,08E-38 |
| GNG2      | -10,3239 | 1,82E-55 |
| ZNF773    | -10,3269 | 2,70E-10 |
| LINC00528 | -10,353  | 2,39E-10 |
| NKG7      | -10,3907 | 2,70E-10 |
| PARP15    | -10,3915 | 6,60E-10 |
| GPA33     | -10,4004 | 1,66E-10 |
| RHOH      | -10,4015 | 4,56E-09 |
| SATB1     | -10,4102 | 1,11E-78 |
| CD8B      | -10,4188 | 1,49E-10 |
| LSP1      | -10,4358 | 2,28E-11 |
| PAX6      | -10,4398 | 1,30E-10 |
| MIR646HG  | -10,4482 | 1,24E-10 |
| ARHGAP25  | -10,4639 | 1,16E-10 |
| ZFP28     | -10,474  | 1,55E-10 |
| LINC00426 | -10,5384 | 7,77E-11 |
| ZNF90     | -10,5397 | 7,61E-11 |
| ZNF649    | -10,5434 | 1,13E-10 |
| CYTH4     | -10,5729 | 5,87E-11 |
| CD48      | -10,6126 | 4,66E-11 |
| LAX1      | -10,6281 | 4,26E-11 |
| ICAM2     | -10,6441 | 5,61E-12 |
| LTA       | -10,6486 | 4,57E-11 |
| LRRC38    | -10,6526 | 3,61E-11 |
| ZKSCAN7   | -10,6674 | 9,03E-11 |
| LINC00539 | -10,7038 | 3,36E-11 |
| TNFRSF1B  | -10,7112 | 2,52E-11 |
| LIMS2     | -10,713  | 1,47E-40 |
| PDCD1     | -10,7208 | 2,39E-11 |
| SPAG16    | -10,7255 | 2,56E-11 |
| LYL1      | -10,7516 | 3,09E-11 |
| CREB3L3   | -10,7572 | 2,36E-11 |
| KLHL3     | -10,7717 | 4,26E-11 |
| FOXB1     | -10,7852 | 1,61E-11 |
| CD37      | -10,809  | 1,11E-22 |
| KCNK17    | -10,8121 | 1,51E-11 |
| C7orf31   | -10,8514 | 1,52E-11 |
| SIGLEC10  | -10,8514 | 1,10E-11 |
| ITPRIPL1  | -10,8552 | 2,28E-12 |
| LOC101927 | -10,8787 | 9,81E-12 |
| ZNF280B   | -10,8853 | 1,33E-11 |
| CD69      | -10,8859 | 5,67E-11 |
| PSMB8     | -10,8956 | 4,75E-43 |
| APOBEC3D  | -10,9023 | 7,84E-12 |
| NLGN4X    | -10,9045 | 8,14E-12 |
| ZFP82     | -10,9095 | 7,54E-12 |
| LAPTM5    | -10,9143 | 7,99E-42 |

|           |          |          |
|-----------|----------|----------|
| CTSW      | -10,9173 | 1,59E-12 |
| ZNF542P   | -10,9211 | 7,76E-12 |
| CNKS2     | -10,9231 | 6,92E-12 |
| PDE6B     | -10,9234 | 6,97E-12 |
| P2RX1     | -10,9271 | 1,37E-11 |
| EVI2A     | -10,95   | 5,88E-12 |
| LINC01224 | -10,9583 | 5,86E-12 |
| TTC24     | -10,9616 | 1,56E-11 |
| ZNF671    | -10,9734 | 6,77E-12 |
| ZNF559    | -10,9877 | 5,15E-12 |
| BHLHE23   | -11,0233 | 3,85E-12 |
| PINLYP    | -11,0452 | 3,40E-12 |
| CNN3      | -11,0645 | 6,02E-13 |
| SDHAF3    | -11,0676 | 2,91E-12 |
| LOC100996 | -11,1524 | 1,72E-12 |
| PSTPIP1   | -11,1681 | 1,80E-12 |
| GIMAP2    | -11,1701 | 1,59E-12 |
| PYHIN1    | -11,1728 | 2,47E-12 |
| MSN       | -11,1819 | 3,10E-11 |
| DOK2      | -11,2582 | 1,34E-12 |
| SIGLEC12  | -11,2606 | 1,54E-12 |
| HS3ST4    | -11,2724 | 8,74E-13 |
| APOBEC3G  | -11,2792 | 8,08E-13 |
| SIGMAR1   | -11,298  | 5,60E-25 |
| LINC00977 | -11,3316 | 6,11E-13 |
| VPREB1    | -11,3379 | 7,56E-13 |
| ZC3HAV1L  | -11,3486 | 5,34E-12 |
| BCHE      | -11,3543 | 6,35E-13 |
| IPW       | -11,3569 | 2,90E-12 |
| WBP5      | -11,39   | 4,39E-13 |
| TREML2    | -11,4108 | 3,57E-13 |
| STXBP5L   | -11,4216 | 3,33E-13 |
| GSPT2     | -11,4273 | 3,65E-13 |
| SIX6      | -11,4418 | 5,20E-13 |
| MDFI      | -11,4768 | 2,62E-13 |
| TCF4      | -11,4786 | 2,86E-13 |
| C8orf88   | -11,49   | 2,19E-13 |
| DLEU7     | -11,4907 | 2,52E-13 |
| RAB37     | -11,4977 | 2,11E-13 |
| FAM65B    | -11,5049 | 4,70E-14 |
| CD300A    | -11,5159 | 2,10E-13 |
| CTSG      | -11,5197 | 1,88E-13 |
| ANGPTL2   | -11,5346 | 2,12E-13 |
| CMAHP     | -11,5415 | 5,74E-12 |
| GDF10     | -11,5904 | 1,34E-13 |
| PVRIG     | -11,5943 | 6,77E-26 |
| MKRN3     | -11,5949 | 4,68E-13 |
| TLE4      | -11,6417 | 2,04E-14 |
| DAB1      | -11,6597 | 8,68E-14 |
| IGLL1     | -11,663  | 8,81E-14 |



|           |          |          |
|-----------|----------|----------|
| ZNF175    | -11,6774 | 6,96E-14 |
| WT1       | -11,713  | 6,27E-14 |
| TNFSF8    | -11,7537 | 4,40E-14 |
| NSG1      | -11,7824 | 3,75E-14 |
| ZNF506    | -11,7974 | 3,36E-14 |
| LIN28B    | -11,8008 | 3,31E-14 |
| LOC100130 | -11,8161 | 3,21E-14 |
| PEX5L     | -11,8424 | 2,50E-14 |
| SMIM24    | -11,8531 | 8,76E-15 |
| CD34      | -11,8809 | 3,15E-14 |
| ZIK1      | -11,8851 | 2,04E-14 |
| TLR9      | -11,8996 | 8,41E-15 |
| C5orf42   | -11,9356 | 1,82E-14 |
| AASS      | -11,9717 | 1,68E-14 |
| LINC00667 | -11,9776 | 2,04E-14 |
| SP140     | -11,9836 | 1,06E-14 |
| GPR174    | -11,9976 | 1,15E-14 |
| ZNF320    | -12,0438 | 1,09E-14 |
| PRKCQ-AS1 | -12,0474 | 7,35E-15 |
| LOC100507 | -12,063  | 6,58E-15 |
| ZFPM2     | -12,0676 | 7,40E-15 |
| CD38      | -12,0761 | 6,84E-15 |
| USP44     | -12,0763 | 6,20E-15 |
| TMIGD2    | -12,0791 | 6,22E-15 |
| JAM3      | -12,1335 | 4,20E-15 |
| PTPRD     | -12,1625 | 3,76E-15 |
| PVRL3     | -12,1776 | 3,46E-15 |
| SLC7A3    | -12,1859 | 3,37E-15 |
| ZSCAN18   | -12,1901 | 3,92E-15 |
| SKAP1     | -12,1937 | 3,54E-15 |
| TDRD9     | -12,1943 | 1,28E-15 |
| CYBRD1    | -12,2002 | 2,77E-15 |
| CD84      | -12,2145 | 2,77E-15 |
| LINC01215 | -12,2227 | 2,88E-15 |
| GNE       | -12,2451 | 2,09E-15 |
| NINJ2     | -12,247  | 2,55E-15 |
| FLI1      | -12,2668 | 5,73E-16 |
| NDN       | -12,2734 | 1,90E-15 |
| FBXL7     | -12,3214 | 1,44E-15 |
| PPP1R16B  | -12,3545 | 5,21E-16 |
| HCLS1     | -12,371  | 2,97E-30 |
| KCNA3     | -12,395  | 1,17E-15 |
| UBA7      | -12,3958 | 8,86E-16 |
| CD2       | -12,3994 | 9,91E-16 |
| CD1B      | -12,4082 | 7,82E-16 |
| C16orf54  | -12,453  | 6,48E-16 |
| OGN       | -12,4648 | 5,38E-16 |
| GIMAP6    | -12,4836 | 6,09E-16 |
| LOC101927 | -12,487  | 5,06E-16 |
| ZNF518B   | -12,4877 | 4,99E-16 |

|           |          |          |
|-----------|----------|----------|
| SLA2      | -12,5271 | 1,93E-16 |
| EMC10     | -12,5286 | 3,94E-16 |
| CD96      | -12,5436 | 1,15E-16 |
| LZTS1     | -12,5466 | 3,44E-16 |
| GPX7      | -12,5681 | 4,71E-16 |
| S1PR4     | -12,5779 | 4,53E-16 |
| KLHL6     | -12,6135 | 2,22E-16 |
| GAS7      | -12,6135 | 2,59E-31 |
| PKIA      | -12,6453 | 1,88E-16 |
| TAL1      | -12,6518 | 1,80E-16 |
| DOCK2     | -12,6725 | 1,36E-46 |
| TCEAL8    | -12,7377 | 9,63E-17 |
| CD93      | -12,7436 | 1,22E-16 |
| TSHR      | -12,7904 | 7,92E-17 |
| TPTEP1    | -12,7991 | 7,40E-17 |
| TBC1D10C  | -12,8144 | 8,23E-17 |
| PIK3CG    | -12,8329 | 6,25E-17 |
| ITGAL     | -12,8402 | 1,74E-17 |
| HHIP-AS1  | -12,8538 | 1,12E-16 |
| NRN1      | -12,9066 | 4,26E-17 |
| KIRREL    | -12,9241 | 2,98E-17 |
| AKT3      | -12,9395 | 2,65E-17 |
| GPX1      | -12,9539 | 3,86E-17 |
| CD6       | -12,9732 | 3,26E-17 |
| DPYD      | -12,9928 | 2,24E-17 |
| LINC00202 | -13,0026 | 2,23E-05 |
| INA       | -13,0087 | 2,43E-17 |
| SAMSN1    | -13,0087 | 2,03E-17 |
| EVI2B     | -13,195  | 5,15E-18 |
| NETO1     | -13,2017 | 4,87E-18 |
| IL7R      | -13,2148 | 4,48E-18 |
| CD53      | -13,2658 | 3,38E-18 |
| TRAF3IP3  | -13,2776 | 3,33E-18 |
| CD247     | -13,3197 | 2,46E-18 |
| SCN3A     | -13,3271 | 2,53E-18 |
| CARD11    | -13,3339 | 2,54E-18 |
| ADAM33    | -13,4053 | 9,50E-18 |
| RAG1      | -13,4054 | 1,21E-83 |
| GMFG      | -13,4154 | 1,51E-18 |
| PARVG     | -13,4372 | 1,05E-18 |
| S1PR1     | -13,4603 | 9,29E-19 |
| SLA       | -13,4769 | 8,44E-19 |
| TRAT1     | -13,5033 | 6,87E-19 |
| RASAL3    | -13,5222 | 6,71E-19 |
| ZCCHC11   | -13,5406 | 7,54E-19 |
| FBLN2     | -13,5596 | 4,93E-19 |
| SPNS3     | -13,5977 | 5,37E-19 |
| UBASH3A   | -13,7594 | 1,27E-19 |
| MFNG      | -13,7735 | 2,11E-19 |
| AIF1      | -13,8254 | 9,62E-20 |

|         |          |          |
|---------|----------|----------|
| BCL11A  | -13,8814 | 5,60E-20 |
| GTSF1   | -13,8913 | 5,70E-20 |
| CHI3L2  | -13,9587 | 4,02E-20 |
| THEMIS  | -14,0415 | 2,83E-20 |
| TESPA1  | -14,0737 | 1,79E-20 |
| SIT1    | -14,0835 | 1,79E-20 |
| CD28    | -14,1145 | 1,24E-20 |
| ITK     | -14,1158 | 1,24E-20 |
| RAG2    | -14,1219 | 1,17E-20 |
| LAIR1   | -14,1597 | 9,21E-21 |
| LCP2    | -14,1665 | 8,57E-21 |
| GYPC    | -14,1724 | 1,57E-20 |
| CD3G    | -14,216  | 6,55E-21 |
| IFI16   | -14,2246 | 1,63E-40 |
| PRKCQ   | -14,2683 | 5,94E-21 |
| FYB     | -14,2735 | 1,74E-21 |
| RCSD1   | -14,296  | 4,53E-21 |
| CDH4    | -14,3475 | 7,97E-21 |
| PTPRM   | -14,3747 | 5,80E-21 |
| CD1C    | -14,5072 | 8,27E-22 |
| HHIP    | -14,5155 | 1,11E-21 |
| NCKAP1L | -14,5741 | 7,98E-22 |
| P2RY8   | -14,575  | 9,73E-22 |
| KIR3DL2 | -14,7    | 4,90E-22 |
| CD1A    | -14,7151 | 2,22E-22 |
| PRKCB   | -14,7507 | 2,42E-22 |
| APBB1IP | -14,7597 | 1,76E-22 |
| ARPP21  | -14,8344 | 9,73E-23 |
| DNTT    | -14,8607 | 7,43E-23 |
| CHST2   | -14,873  | 8,14E-23 |
| NKX2-5  | -14,9716 | 4,04E-23 |
| MYO1G   | -14,9859 | 3,16E-23 |
| TOX     | -15,0301 | 2,15E-23 |
| CELF2   | -15,0873 | 1,76E-23 |
| PTPN7   | -15,1137 | 1,22E-23 |
| GRAP2   | -15,1997 | 6,89E-24 |
| CD4     | -15,2189 | 9,17E-24 |
| CD1E    | -15,2277 | 1,16E-23 |
| SASH3   | -15,3399 | 3,27E-24 |
| IL2RG   | -15,3525 | 3,18E-24 |
| PTPRC   | -15,4525 | 1,20E-24 |
| RAC2    | -15,4682 | 1,47E-24 |
| ZAP70   | -15,6555 | 2,81E-25 |
| XIST    | -15,7087 | 1,45E-08 |
| CD3D    | -15,7419 | 1,73E-25 |
| SH2D1A  | -15,8149 | 7,53E-26 |
| LCK     | -15,8473 | 9,28E-26 |
| SPN     | -16,207  | 6,12E-27 |
| TSPAN7  | -16,2123 | 4,83E-27 |
| CD3E    | -16,5052 | 6,57E-28 |

|         |          |          |
|---------|----------|----------|
| ETS1    | -16,5332 | 3,88E-28 |
| IKZF1   | -16,6221 | 2,45E-28 |
| ITGA4   | -17,1723 | 2,36E-30 |
| ITM2A   | -17,2557 | 2,21E-30 |
| ALDH1A2 | -17,6951 | 4,41E-32 |

## HCC998

| Gene      | log2FoldCh | FDR      |
|-----------|------------|----------|
| LDOC1     | 15,02067   | 1,05E-22 |
| TSPYL5    | 14,89026   | 1,22E-22 |
| C3orf14   | 14,49209   | 3,13E-21 |
| SPDEF     | 14,3064    | 3,22E-11 |
| EFEMP1    | 14,19703   | 1,67E-20 |
| MATK      | 14,01553   | 5,58E-20 |
| GFRA1     | 13,80921   | 6,07E-19 |
| BGN       | 13,63471   | 2,29E-06 |
| S1PR3     | 13,61444   | 2,39E-11 |
| DSCAM-AS1 | 13,59866   | 4,78E-11 |
| ACKR3     | 13,4312    | 2,28E-18 |
| RTN4RL1   | 13,38226   | 3,29E-18 |
| PXDN      | 13,25621   | 1,10E-17 |
| BASP1     | 13,2179    | 2,07E-09 |
| MYEF2     | 13,21538   | 2,63E-17 |
| ZNF43     | 13,17183   | 1,18E-17 |
| VAV3      | 13,15812   | 1,46E-17 |
| PRLR      | 13,07816   | 2,79E-17 |
| AMOTL1    | 13,03444   | 3,17E-17 |
| HTRA1     | 12,94143   | 5,77E-17 |
| ABCA12    | 12,92665   | 2,15E-16 |
| COLEC12   | 12,79441   | 1,02E-15 |
| CHST11    | 12,78896   | 2,68E-16 |
| EMB       | 12,77568   | 1,49E-16 |
| FRMD4A    | 12,71299   | 7,12E-16 |
| TFF1      | 12,69871   | 2,25E-28 |
| SPG20     | 12,62977   | 3,97E-16 |
| GSTM3     | 12,52983   | 1,84E-16 |
| PRICKLE2  | 12,4937    | 1,17E-27 |
| DTNA      | 12,47557   | 1,94E-15 |
| DLX5      | 12,45386   | 1,34E-15 |
| FBP1      | 12,43989   | 5,01E-43 |
| C15orf59  | 12,43259   | 6,36E-15 |
| GALNT16   | 12,39955   | 8,70E-06 |
| SLC1A2    | 12,36273   | 2,24E-15 |
| C14orf132 | 12,31425   | 2,75E-15 |
| ZNF304    | 12,26446   | 3,92E-15 |
| MSI1      | 12,24651   | 1,17E-16 |
| ZNF85     | 12,22294   | 4,72E-15 |
| EVL       | 12,20139   | 1,27E-16 |
| NPY1R     | 12,16606   | 9,98E-15 |
| ZIC1      | 12,15098   | 1,87E-14 |
| CRISPLD1  | 12,13311   | 4,50E-14 |
| BCAS1     | 12,10375   | 6,76E-05 |
| ACSS3     | 12,07637   | 1,85E-28 |
| STC1      | 12,0239    | 1,73E-27 |
| GALNT14   | 12,00203   | 1,85E-14 |
| ZNF569    | 11,99968   | 3,70E-14 |

|          |          |          |
|----------|----------|----------|
| TBX2     | 11,96873 | 2,33E-14 |
| C5orf38  | 11,83362 | 9,20E-14 |
| PCP4     | 11,82643 | 6,46E-14 |
| FAM127C  | 11,82218 | 1,28E-15 |
| SDC2     | 11,81758 | 5,97E-14 |
| MAP9     | 11,78223 | 1,14E-13 |
| ASCL4    | 11,7789  | 8,52E-14 |
| ZFP30    | 11,73708 | 9,97E-14 |
| EFS      | 11,65203 | 1,88E-13 |
| TCEA3    | 11,64927 | 3,56E-15 |
| TMPRSS13 | 11,63844 | 2,79E-13 |
| TDRD1    | 11,63412 | 1,82E-13 |
| ST8SIA4  | 11,62612 | 2,23E-12 |
| ZNF331   | 11,49764 | 2,15E-12 |
| KCNK15   | 11,49622 | 5,03E-13 |
| LIFR     | 11,46712 | 1,16E-12 |
| RIMS4    | 11,46459 | 2,36E-12 |
| PGR      | 11,45126 | 2,08E-11 |
| MIPOL1   | 11,44575 | 5,75E-13 |
| MB       | 11,42139 | 6,55E-13 |
| GLI3     | 11,40553 | 1,04E-12 |
| ZNF793   | 11,39418 | 8,37E-13 |
| FAM3B    | 11,39088 | 8,19E-13 |
| ZNF548   | 11,38803 | 9,76E-13 |
| RGMA     | 11,37579 | 1,37E-12 |
| LRP2     | 11,3638  | 8,30E-07 |
| MPDZ     | 11,35017 | 1,54E-12 |
| FGF12    | 11,34341 | 1,82E-12 |
| MOCS1    | 11,28034 | 4,40E-12 |
| ZNF606   | 11,26892 | 3,14E-12 |
| CHST10   | 11,25254 | 6,08E-12 |
| RET      | 11,2525  | 1,35E-11 |
| ZNF14    | 11,23012 | 2,86E-12 |
| SPESP1   | 11,1971  | 4,09E-12 |
| SLC7A2   | 11,1936  | 8,05E-24 |
| OSMR     | 11,16314 | 7,91E-12 |
| GPX3     | 11,15676 | 0,000109 |
| ESR1     | 11,15562 | 1,76E-34 |
| PCDH18   | 11,12746 | 1,73E-12 |
| ZNF433   | 11,12437 | 4,19E-12 |
| ZNF93    | 11,08539 | 1,19E-13 |
| EFNB3    | 10,97484 | 1,03E-11 |
| NHS      | 10,95329 | 7,15E-13 |
| DDIT4L   | 10,9162  | 2,54E-11 |
| SLC8A1   | 10,91227 | 1,43E-11 |
| CASC9    | 10,85088 | 2,08E-11 |
| SHISA9   | 10,83701 | 3,32E-11 |
| EHD3     | 10,83165 | 4,16E-11 |
| MEIS3P1  | 10,81462 | 3,46E-11 |
| AARD     | 10,79535 | 2,96E-11 |

|           |          |          |
|-----------|----------|----------|
| ZNF829    | 10,78589 | 1,11E-12 |
| ZNF570    | 10,77631 | 3,44E-11 |
| ZFP3      | 10,77346 | 8,03E-13 |
| CHRM1     | 10,77044 | 1,21E-10 |
| ZNF287    | 10,76751 | 3,43E-11 |
| ZNF256    | 10,75648 | 3,80E-11 |
| ELOVL2    | 10,73224 | 4,60E-11 |
| PPM1E     | 10,70047 | 1,64E-18 |
| ZNF682    | 10,67299 | 6,37E-11 |
| ZYG11A    | 10,65982 | 2,03E-10 |
| C18orf63  | 10,65387 | 9,57E-11 |
| NMNAT2    | 10,61635 | 1,11E-10 |
| GUCY1A2   | 10,59375 | 2,33E-12 |
| LINC00925 | 10,57567 | 1,24E-10 |
| TIMP3     | 10,51054 | 2,81E-10 |
| ZNF486    | 10,50546 | 2,11E-10 |
| ZNF732    | 10,50439 | 3,28E-10 |
| BATF      | 10,48033 | 4,14E-10 |
| FAM110B   | 10,46914 | 2,94E-10 |
| ASCL1     | 10,46833 | 4,39E-10 |
| MAGEH1    | 10,44813 | 3,59E-10 |
| ADGRL2    | 10,44211 | 2,87E-10 |
| LYPD1     | 10,43762 | 4,25E-10 |
| C12orf56  | 10,41741 | 3,11E-10 |
| EPHA6     | 10,4048  | 3,19E-10 |
| HSPB8     | 10,39286 | 2,68E-27 |
| RAB39B    | 10,38165 | 0,000991 |
| SLC9A4    | 10,37915 | 2,11E-09 |
| CXCL12    | 10,375   | 4,18E-10 |
| MTSS1     | 10,37222 | 2,72E-10 |
| PRIMA1    | 10,35133 | 1,80E-09 |
| TBX2-AS1  | 10,3216  | 7,76E-10 |
| NCKAP5    | 10,31348 | 6,02E-10 |
| SYT3      | 10,3125  | 1,91E-09 |
| CHST8     | 10,28533 | 6,31E-10 |
| DCLK1     | 10,27077 | 7,20E-20 |
| CCL2      | 10,26676 | 3,35E-09 |
| SYT12     | 10,23191 | 1,33E-25 |
| ZNF529    | 10,20745 | 1,01E-09 |
| BEND5     | 10,17209 | 1,65E-09 |
| ZNF568    | 10,1655  | 5,30E-09 |
| SLC2A10   | 10,16123 | 1,54E-09 |
| TRPV4     | 10,13302 | 2,35E-09 |
| IRX3      | 10,12342 | 2,44E-28 |
| PCDHB6    | 10,1221  | 2,18E-09 |
| GUCY1A3   | 10,10669 | 3,93E-11 |
| EDA2R     | 10,10556 | 4,65E-09 |
| ZNF492    | 10,09695 | 9,03E-09 |
| TYRP1     | 10,06715 | 2,50E-09 |
| SLITRK4   | 10,04119 | 3,71E-09 |

|           |          |          |
|-----------|----------|----------|
| MANSC4    | 10,01817 | 2,87E-07 |
| TEX15     | 10,01486 | 3,17E-09 |
| CALHM2    | 10,0135  | 1,15E-10 |
| IRX4      | 10,013   | 6,23E-09 |
| FAM20C    | 10,00223 | 7,09E-11 |
| FAM19A5   | 9,989433 | 5,77E-09 |
| IRX2      | 9,979434 | 1,01E-26 |
| LINC01116 | 9,966234 | 4,27E-09 |
| PCDHGB5   | 9,953704 | 4,54E-09 |
| FUT9      | 9,933783 | 5,09E-09 |
| POU3F3    | 9,930664 | 1,12E-08 |
| TENM4     | 9,9238   | 9,91E-09 |
| DDX43     | 9,919997 | 7,31E-09 |
| GPR27     | 9,913681 | 7,08E-09 |
| COL5A1    | 9,913206 | 1,63E-08 |
| ALDH3B2   | 9,894236 | 1,94E-22 |
| ZNF30     | 9,878616 | 9,03E-09 |
| ZNF549    | 9,865583 | 1,15E-08 |
| GGT6      | 9,850192 | 9,29E-27 |
| IGFBP2    | 9,830465 | 8,16E-06 |
| SPTSSB    | 9,819617 | 2,73E-22 |
| PRPH      | 9,816154 | 1,48E-08 |
| ZNF879    | 9,782138 | 1,30E-08 |
| ZNF354C   | 9,779577 | 1,46E-08 |
| WISP2     | 9,776691 | 7,69E-07 |
| PROM2     | 9,770735 | 1,68E-54 |
| C17orf104 | 9,754095 | 6,90E-08 |
| FCGR1A    | 9,752584 | 8,22E-08 |
| KCNMA1    | 9,731135 | 5,83E-08 |
| EYA2      | 9,72015  | 6,66E-08 |
| RGS6      | 9,712256 | 3,13E-08 |
| CA8       | 9,697605 | 3,22E-08 |
| ONECUT1   | 9,696075 | 4,29E-08 |
| ALOX15    | 9,681996 | 1,77E-14 |
| COL4A5    | 9,67728  | 4,76E-08 |
| CNGB3     | 9,665961 | 3,30E-08 |
| LOC339862 | 9,665045 | 2,86E-08 |
| SFMBT2    | 9,653294 | 4,47E-08 |
| RIC3      | 9,64675  | 4,73E-08 |
| C2orf74   | 9,604596 | 3,61E-08 |
| BLNK      | 9,590241 | 1,06E-06 |
| TUB       | 9,559155 | 4,64E-08 |
| THBD      | 9,5528   | 5,88E-08 |
| TMEM150C  | 9,514586 | 1,12E-23 |
| SHISA2    | 9,514277 | 9,95E-08 |
| LINC00858 | 9,51216  | 1,41E-07 |
| CPE       | 9,502472 | 1,19E-09 |
| PGM5      | 9,500237 | 9,65E-08 |
| ADAMTS9   | 9,499543 | 4,63E-07 |
| RAB31     | 9,499046 | 3,34E-09 |



|              |          |          |
|--------------|----------|----------|
| IGSF5        | 9,496721 | 7,88E-08 |
| SLC22A17     | 9,49438  | 7,22E-08 |
| CRABP1       | 9,494295 | 2,09E-07 |
| SPSB4        | 9,483238 | 1,58E-07 |
| GRIK3        | 9,455727 | 3,84E-07 |
| HOXC13-AS1   | 9,438673 | 1,24E-07 |
| PCDHB3       | 9,437384 | 9,91E-23 |
| RNF150       | 9,433937 | 1,10E-07 |
| ADAMTS7      | 9,430021 | 5,67E-09 |
| HTR2C        | 9,421943 | 1,06E-07 |
| TMEM163      | 9,415766 | 1,48E-07 |
| SH3GL3       | 9,402797 | 1,41E-07 |
| CALCR        | 9,373794 | 1,93E-07 |
| ZNF550       | 9,371308 | 9,41E-07 |
| SNCAIP       | 9,364852 | 1,43E-07 |
| PLA2G3       | 9,3562   | 9,38E-07 |
| JAM2         | 9,331028 | 9,03E-07 |
| MPPED2       | 9,313587 | 6,95E-07 |
| ELOVL4       | 9,309188 | 5,10E-07 |
| HOXC11       | 9,302718 | 4,86E-09 |
| TPTE         | 9,302609 | 2,37E-07 |
| MLPH         | 9,290466 | 1,74E-41 |
| TENM3        | 9,275716 | 1,10E-82 |
| DSCAM        | 9,275646 | 5,76E-07 |
| NTN4         | 9,261591 | 3,78E-07 |
| AFF3         | 9,259456 | 3,40E-07 |
| STMND1       | 9,255604 | 2,87E-07 |
| LOC339803    | 9,250437 | 6,59E-07 |
| SLC25A21-1   | 9,248358 | 3,40E-06 |
| A1BG-AS1     | 9,247949 | 4,91E-09 |
| ZNF704       | 9,247657 | 2,45E-39 |
| PRICKLE2-AS1 | 9,245919 | 3,14E-07 |
| LINC00664    | 9,228294 | 6,52E-07 |
| LINC00052    | 9,207401 | 4,05E-08 |
| HAGLR        | 9,153835 | 4,86E-07 |
| CACNA1D      | 9,112495 | 6,17E-15 |
| ZNF530       | 9,09584  | 7,32E-07 |
| SERPINA1     | 9,087902 | 7,69E-07 |
| EFHD1        | 9,080078 | 2,55E-14 |
| ZIC4         | 9,065833 | 8,03E-07 |
| PDZRN3       | 9,052295 | 8,56E-07 |
| VAX2         | 9,051393 | 1,01E-06 |
| C5AR2        | 9,03241  | 2,59E-13 |
| KCNG1        | 9,027783 | 8,49E-32 |
| ANK1         | 9,027005 | 1,72E-05 |
| SNAP25       | 9,023529 | 1,27E-06 |
| CAMK2B       | 9,020235 | 1,51E-08 |
| ARMCX1       | 9,019409 | 1,92E-06 |
| RFTN2        | 9,011391 | 1,84E-06 |
| TMEM132F     | 8,998563 | 5,70E-05 |

|           |          |          |
|-----------|----------|----------|
| ZNF618    | 8,991527 | 5,18E-83 |
| SLFN11    | 8,98255  | 1,51E-06 |
| FAR2P1    | 8,982513 | 9,47E-08 |
| DOCK10    | 8,978304 | 2,24E-06 |
| RAI2      | 8,978304 | 2,24E-06 |
| LOC728392 | 8,962452 | 3,68E-06 |
| TTC29     | 8,958226 | 1,50E-06 |
| ELF5      | 8,949841 | 1,19E-07 |
| PVALB     | 8,920841 | 4,75E-06 |
| NMUR2     | 8,915326 | 1,86E-06 |
| HRK       | 8,911386 | 3,49E-05 |
| TCHHL1    | 8,90676  | 9,48E-05 |
| ZNF726    | 8,903932 | 5,35E-06 |
| UNC5C     | 8,900774 | 6,05E-06 |
| KCNQ5     | 8,885436 | 4,52E-06 |
| ITGA2B    | 8,884791 | 9,51E-08 |
| GATA5     | 8,863292 | 2,68E-06 |
| SLC9A2    | 8,859171 | 4,23E-77 |
| LRRK2     | 8,847464 | 3,71E-06 |
| GJA1      | 8,844207 | 1,42E-05 |
| ZNF610    | 8,833965 | 2,86E-06 |
| LOC100128 | 8,82488  | 2,96E-06 |
| ZNF595    | 8,823963 | 7,92E-33 |
| GUCY1B3   | 8,82321  | 3,82E-06 |
| SLC6A14   | 8,81885  | 3,29E-06 |
| CLCA2     | 8,811747 | 4,54E-05 |
| FAM196A   | 8,788932 | 1,13E-05 |
| ADAMTS19  | 8,780495 | 5,39E-40 |
| IGFBP5    | 8,778477 | 1,59E-05 |
| ZNF98     | 8,77494  | 7,47E-06 |
| HOXD12    | 8,767594 | 1,60E-05 |
| TUBA3E    | 8,73329  | 1,15E-07 |
| TMEM106A  | 8,727912 | 5,89E-06 |
| TARP      | 8,719868 | 2,16E-05 |
| NCAM2     | 8,718227 | 6,75E-22 |
| ZG16B     | 8,705074 | 4,59E-07 |
| BMP2      | 8,690692 | 4,33E-38 |
| NUP210L   | 8,679497 | 1,37E-18 |
| SPINK5    | 8,669108 | 3,64E-07 |
| LOC100996 | 8,660182 | 9,21E-06 |
| TRIL      | 8,656679 | 1,15E-05 |
| CEACAM21  | 8,646834 | 6,40E-13 |
| FLT3      | 8,64314  | 7,82E-06 |
| SLC1A3    | 8,63559  | 8,26E-06 |
| NPAS3     | 8,631101 | 1,33E-05 |
| WFDC2     | 8,622582 | 1,59E-05 |
| MIR4458HG | 8,612508 | 9,90E-06 |
| FOXI3     | 8,599741 | 1,07E-05 |
| ZNF543    | 8,597352 | 1,48E-11 |
| SPOCK1    | 8,595894 | 1,28E-05 |

|            |          |          |
|------------|----------|----------|
| ZNF736     | 8,594924 | 3,42E-23 |
| GPR158     | 8,591964 | 1,58E-07 |
| POU6F2     | 8,585918 | 1,18E-05 |
| GRID1      | 8,58298  | 1,35E-05 |
| AR         | 8,569033 | 1,45E-23 |
| GFRA3      | 8,562623 | 3,88E-05 |
| CDH18      | 8,557548 | 1,46E-05 |
| HDGFRP3    | 8,548923 | 4,47E-45 |
| VIM-AS1    | 8,547515 | 1,49E-05 |
| IGSF11     | 8,538476 | 1,33E-05 |
| RASSF8-AS1 | 8,53796  | 1,90E-05 |
| LOC148705  | 8,524247 | 2,24E-07 |
| KIAA1324   | 8,522206 | 8,85E-32 |
| ZNF418     | 8,518152 | 1,67E-05 |
| RNF180     | 8,512753 | 2,18E-05 |
| ZNF345     | 8,509154 | 1,57E-05 |
| CRLF1      | 8,50405  | 2,90E-07 |
| XKR7       | 8,4996   | 2,89E-05 |
| SLC52A1    | 8,49215  | 5,27E-05 |
| GATA3-AS1  | 8,476296 | 2,06E-05 |
| NYNRIN     | 8,475578 | 2,94E-09 |
| CYP24A1    | 8,472555 | 2,86E-07 |
| ADAMTSL3   | 8,442187 | 2,99E-05 |
| XG         | 8,429003 | 0,000256 |
| ICOS       | 8,41825  | 2,70E-05 |
| GXYLT2     | 8,417665 | 2,78E-05 |
| ARL11      | 8,416019 | 2,68E-05 |
| LOC440461  | 8,413876 | 5,23E-05 |
| LOC101927  | 8,410804 | 3,88E-05 |
| ZNF423     | 8,395554 | 2,75E-05 |
| LINC00885  | 8,392123 | 0,000129 |
| HOPX       | 8,390407 | 0,000108 |
| KCNF1      | 8,385504 | 3,47E-05 |
| PKD1L2     | 8,379019 | 2,99E-05 |
| IGSF1      | 8,376384 | 0,000135 |
| MARCH1     | 8,347751 | 8,44E-07 |
| GPM6B      | 8,347093 | 3,52E-05 |
| KCNU1      | 8,341908 | 3,94E-05 |
| KCNJ8      | 8,324998 | 4,61E-52 |
| CYP4F22    | 8,312061 | 5,35E-05 |
| FHOD3      | 8,307795 | 0,000141 |
| CALML5     | 8,300819 | 7,32E-05 |
| SGCG       | 8,29567  | 0,000106 |
| CPEB1      | 8,295425 | 5,71E-05 |
| NRK        | 8,293176 | 0,000146 |
| ALOX12P2   | 8,292017 | 0,000147 |
| PRKD1      | 8,288868 | 6,16E-05 |
| ZNF264     | 8,274056 | 5,41E-05 |
| INHA       | 8,260231 | 3,39E-05 |
| C8orf48    | 8,242479 | 6,64E-05 |

|           |          |           |
|-----------|----------|-----------|
| DRD1      | 8,236932 | 0,00036   |
| CAPN9     | 8,2238   | 7,91E-05  |
| DYNC1I1   | 8,212721 | 2,41E-41  |
| PCDHGB1   | 8,21223  | 1,54E-11  |
| LOC441666 | 8,210199 | 8,26E-05  |
| PCDHB4    | 8,203273 | 3,59E-06  |
| SMTNL2    | 8,190413 | 8,40E-05  |
| KDR       | 8,173282 | 9,26E-05  |
| CELF3     | 8,161871 | 0,000126  |
| NRG3      | 8,158925 | 2,04E-06  |
| ZNF204P   | 8,147438 | 1,73E-06  |
| PHLDA3    | 8,146372 | 6,04E-11  |
| IBSP      | 8,124372 | 0,000107  |
| PABPC4L   | 8,116276 | 0,000139  |
| RECK      | 8,108808 | 0,000176  |
| PLEKHO1   | 8,106736 | 1,65E-78  |
| VAV1      | 8,106392 | 2,01E-10  |
| SYNPO2    | 8,10455  | 9,39E-29  |
| PAPLN     | 8,097206 | 0,000155  |
| GSG1L     | 8,09512  | 2,04E-06  |
| RAB34     | 8,092566 | 7,22E-05  |
| LINC00494 | 8,090328 | 0,000121  |
| ARHGEF6   | 8,084129 | 0,000137  |
| ABCG1     | 8,076043 | 5,92E-33  |
| SETBP1    | 8,073675 | 0,000221  |
| NAP1L2    | 8,073375 | 0,000236  |
| ZNF813    | 8,072138 | 6,12E-19  |
| DAAM2     | 8,070913 | 0,000133  |
| CNTNAP3   | 8,068823 | 0,000137  |
| CACNA1I   | 8,052953 | 0,000269  |
| SUSD2     | 8,02192  | 6,25E-13  |
| SCD5      | 8,011803 | 1,28E-22  |
| SDK1      | 8,004071 | 1,48E-10  |
| ARMCX2    | 8,002293 | 0,000229  |
| UPK2      | 7,99768  | 2,29E-08  |
| ANKRD18B  | 7,994776 | 2,98E-10  |
| BRINP2    | 7,994224 | 0,000326  |
| ZNF529-AS | 7,993837 | 0,000188  |
| PCDHB2    | 7,976507 | 2,40E-36  |
| GPC3      | 7,972626 | 0,000431  |
| C8orf46   | 7,969714 | 0,000217  |
| CNNM1     | 7,96851  | 3,54E-06  |
| KCNMB2-A  | 7,952828 | 3,82E-06  |
| NPR3      | 7,950304 | 8,87E-19  |
| ZNF793-AS | 7,93521  | 0,000244  |
| CACNG4    | 7,918135 | 1,16E-40  |
| TFAP2C    | 7,91749  | 3,27E-109 |
| ZNF311    | 7,897972 | 6,50E-09  |
| MIR99AHG  | 7,895665 | 0,000741  |
| INPP5D    | 7,890391 | 0,000141  |

|           |          |           |
|-----------|----------|-----------|
| WDR72     | 7,876668 | 2,83E-58  |
| FLT4      | 7,875746 | 1,46E-05  |
| LRFN5     | 7,871704 | 0,000325  |
| ERG       | 7,868279 | 5,77E-06  |
| DPY19L2P1 | 7,860023 | 0,000417  |
| FHL1      | 7,855166 | 0,000374  |
| SOX11     | 7,833519 | 0,000417  |
| PRUNE2    | 7,825654 | 0,000734  |
| JPH3      | 7,820818 | 1,00E-09  |
| MIR2052H  | 7,820315 | 0,000608  |
| LRRC2     | 7,815301 | 0,000509  |
| C19orf81  | 7,814472 | 7,54E-06  |
| ST8SIA1   | 7,809036 | 0,000446  |
| PANX3     | 7,803248 | 0,000899  |
| C18orf61  | 7,796867 | 0,000658  |
| SCUBE3    | 7,796462 | 0,000464  |
| CCDC83    | 7,795145 | 1,13E-05  |
| KCNN2     | 7,790019 | 8,34E-06  |
| FGF13     | 7,788841 | 0,000579  |
| TSHZ3     | 7,788664 | 1,25E-13  |
| AK8       | 7,787563 | 0,00061   |
| NEFH      | 7,779515 | 0,000962  |
| PTPRQ     | 7,776472 | 0,000488  |
| GATA3     | 7,776088 | 2,36E-127 |
| SUSD4     | 7,770043 | 9,73E-06  |
| GREB1     | 7,765709 | 4,02E-97  |
| RFTN1     | 7,761384 | 0,000537  |
| MTMR7     | 7,758597 | 9,67E-06  |
| ABCC8     | 7,756199 | 0,000528  |
| ST8SIA6   | 7,747478 | 0,000734  |
| HCAR1     | 7,744847 | 0,000679  |
| MYCN      | 7,736954 | 0,000591  |
| SERTAD4-A | 7,701789 | 0,000996  |
| AMOT      | 7,695159 | 4,78E-57  |
| NOX5      | 7,692263 | 0,00076   |
| SYTL5     | 7,690903 | 0,000745  |
| ATP6V1B1  | 7,690472 | 0,000983  |
| DOCK8     | 7,688869 | 3,33E-09  |
| EVC2      | 7,67216  | 0,000942  |
| FAM171A2  | 7,668868 | 1,87E-55  |
| TFAP2A-AS | 7,661004 | 1,64E-05  |
| ZNF772    | 7,639444 | 4,69E-09  |
| HOTAIR    | 7,624825 | 1,85E-05  |
| LDHD      | 7,612329 | 1,25E-07  |
| SYT10     | 7,611063 | 0,000984  |
| RHOBTB1   | 7,577975 | 4,03E-167 |
| MYLK      | 7,575539 | 2,32E-05  |
| AP4B1-AS1 | 7,571421 | 5,59E-20  |
| EML1      | 7,552678 | 6,06E-44  |
| SLC24A3   | 7,548041 | 2,89E-12  |

|           |          |          |
|-----------|----------|----------|
| PRKAA2    | 7,533779 | 6,50E-13 |
| ZNF790-AS | 7,51893  | 4,91E-12 |
| PREX1     | 7,493683 | 1,37E-68 |
| ZNF737    | 7,467495 | 1,74E-30 |
| CALD1     | 7,458892 | 8,12E-10 |
| PLXNA4    | 7,447603 | 1,24E-17 |
| ZNF681    | 7,439409 | 1,68E-29 |
| WIF1      | 7,434652 | 0,00018  |
| RIPPLY3   | 7,417224 | 4,84E-05 |
| GNB4      | 7,392777 | 1,81E-11 |
| CRMP1     | 7,389575 | 0,00062  |
| EMID1     | 7,363448 | 5,39E-08 |
| CYFIP2    | 7,349853 | 3,35E-24 |
| PCDHA6    | 7,33462  | 4,15E-55 |
| ANTXR1    | 7,330373 | 4,18E-60 |
| LINC00665 | 7,329018 | 1,10E-35 |
| RNF182    | 7,320738 | 2,27E-18 |
| RERG      | 7,275784 | 1,03E-13 |
| ACTA2     | 7,27102  | 1,21E-13 |
| RASSF8    | 7,258937 | 2,46E-47 |
| OGDHL     | 7,247019 | 9,09E-23 |
| FAM109B   | 7,243978 | 2,08E-14 |
| CHGA      | 7,235828 | 7,52E-18 |
| SEMA3E    | 7,228582 | 0,000433 |
| BST2      | 7,21485  | 6,38E-05 |
| SCN1B     | 7,207078 | 0,000279 |
| GPR68     | 7,188181 | 0,000118 |
| TRPV6     | 7,176456 | 0,000121 |
| ERBB4     | 7,170421 | 2,64E-13 |
| ANKS1B    | 7,166859 | 0,000216 |
| ZNF790    | 7,131837 | 8,20E-10 |
| DLX3      | 7,123845 | 1,65E-44 |
| SCARA3    | 7,102126 | 3,44E-25 |
| RASGEF1A  | 7,101369 | 4,27E-31 |
| SLIT2     | 7,10033  | 0,000178 |
| ZNF876P   | 7,098426 | 1,74E-07 |
| SLC47A1   | 7,09304  | 1,53E-09 |
| GHR       | 7,091039 | 0,000167 |
| CHRNA4    | 7,055207 | 0,00049  |
| FRMD6     | 7,046092 | 3,70E-86 |
| TNFAIP8L3 | 7,041312 | 5,41E-29 |
| PRAME     | 7,037049 | 9,78E-14 |
| SNCB      | 7,035751 | 0,000947 |
| CCDC3     | 7,019545 | 0,00026  |
| CCM2L     | 7,001187 | 1,22E-09 |
| SULF2     | 6,996305 | 7,39E-53 |
| HOXC10    | 6,953238 | 1,78E-65 |
| FBXO15    | 6,936258 | 1,17E-06 |
| PTPN13    | 6,934679 | 2,97E-36 |
| SEMA4A    | 6,93265  | 1,14E-34 |

|           |          |           |
|-----------|----------|-----------|
| MAFB      | 6,92537  | 2,04E-27  |
| OBSL1     | 6,918156 | 6,07E-51  |
| NEURL1B   | 6,912698 | 1,43E-54  |
| TLE2      | 6,909141 | 1,04E-43  |
| PDZD4     | 6,879944 | 1,03E-14  |
| MAPT      | 6,877663 | 4,34E-41  |
| PCDHA13   | 6,848575 | 2,28E-06  |
| COL9A2    | 6,838313 | 6,99E-15  |
| CBFA2T3   | 6,837361 | 1,05E-44  |
| NUPR1     | 6,835696 | 6,81E-29  |
| PCDHB8    | 6,828096 | 2,30E-30  |
| NAALADL2  | 6,804651 | 4,76E-20  |
| FREM2     | 6,801726 | 5,48E-49  |
| SEMA6B    | 6,791715 | 9,91E-23  |
| MEX3B     | 6,78399  | 1,28E-38  |
| PAX5      | 6,781135 | 3,56E-05  |
| FOXP1     | 6,77248  | 1,33E-40  |
| HOXC-AS3  | 6,771946 | 2,43E-08  |
| LOC284581 | 6,717772 | 6,10E-08  |
| KCNJ4     | 6,690664 | 0,000934  |
| LOC10013C | 6,631209 | 1,13E-05  |
| SIDT1     | 6,622284 | 4,68E-14  |
| VIM       | 6,60453  | 1,11E-05  |
| TFPI      | 6,573539 | 4,02E-05  |
| PRR36     | 6,569977 | 2,78E-38  |
| C14orf37  | 6,558088 | 6,12E-07  |
| S100A9    | 6,543337 | 0,000301  |
| CYP1B1    | 6,542504 | 1,90E-32  |
| TNFRSF19  | 6,540662 | 2,62E-67  |
| ERC2      | 6,52357  | 2,49E-09  |
| SNAR-E    | 6,518019 | 5,25E-05  |
| KLHL13    | 6,511762 | 6,63E-10  |
| FZD2      | 6,501492 | 6,78E-33  |
| NFATC2    | 6,499418 | 2,80E-10  |
| LHX1      | 6,483655 | 3,90E-07  |
| CAMK1D    | 6,468028 | 1,15E-11  |
| SLC25A21  | 6,456282 | 3,14E-05  |
| PCDHA12   | 6,39316  | 4,32E-16  |
| PACSIN1   | 6,380908 | 6,92E-19  |
| TRPS1     | 6,338882 | 8,56E-116 |
| HCN4      | 6,332647 | 3,82E-17  |
| LINC00649 | 6,326097 | 2,25E-05  |
| AEBP1     | 6,258219 | 2,31E-06  |
| PTCHD2    | 6,249279 | 1,83E-06  |
| AK7       | 6,207543 | 2,56E-28  |
| ACTG2     | 6,204727 | 5,84E-07  |
| LOC728735 | 6,198715 | 4,10E-06  |
| CDK14     | 6,192017 | 4,45E-06  |
| RAB9B     | 6,189049 | 0,00015   |
| CERCAM    | 6,1879   | 2,35E-39  |

|          |          |           |
|----------|----------|-----------|
| DIRAS1   | 6,18067  | 2,42E-41  |
| A1BG     | 6,168623 | 8,03E-10  |
| ARHGEF17 | 6,155999 | 7,34E-29  |
| TMEM136  | 6,155282 | 7,65E-13  |
| MGAT5B   | 6,15259  | 5,34E-06  |
| HLA-DRB1 | 6,151757 | 5,62E-09  |
| PPP1R9A  | 6,141527 | 5,05E-50  |
| SALL4    | 6,134368 | 5,55E-13  |
| TP53INP1 | 6,133238 | 1,18E-23  |
| ZNF572   | 6,122728 | 2,58E-13  |
| MED12L   | 6,115241 | 3,73E-20  |
| PCDHB16  | 6,107535 | 6,22E-30  |
| TDRD5    | 6,10746  | 3,71E-15  |
| EFR3B    | 6,090076 | 1,84E-29  |
| SKIDA1   | 6,087695 | 4,57E-12  |
| LIN7A    | 6,082378 | 3,50E-36  |
| LCP1     | 6,074578 | 1,15E-30  |
| EMCN     | 6,0627   | 0,000291  |
| PAX2     | 6,047439 | 0,000682  |
| UNC5B    | 6,045647 | 0,0001    |
| KCNIP3   | 6,030484 | 3,10E-12  |
| AGAP2    | 6,02887  | 6,33E-20  |
| RASSF2   | 6,019785 | 1,63E-08  |
| NREP     | 6,019497 | 1,17E-30  |
| TUBA3D   | 6,015121 | 2,85E-07  |
| ARNT2    | 6,011031 | 9,00E-31  |
| APBA1    | 6,007081 | 0,000201  |
| EOMES    | 5,986797 | 4,38E-10  |
| TMEM121  | 5,968884 | 5,20E-11  |
| HPN      | 5,962563 | 6,94E-22  |
| ST3GAL5  | 5,961133 | 1,21E-05  |
| RIMS2    | 5,961052 | 0,000551  |
| FAM81B   | 5,955839 | 1,96E-05  |
| CRIP2    | 5,947829 | 2,08E-106 |
| PCDHA10  | 5,9369   | 2,53E-18  |
| TENM1    | 5,934966 | 4,42E-06  |
| ITGA5    | 5,930507 | 1,93E-06  |
| SEMA3D   | 5,921978 | 1,44E-05  |
| PDE9A    | 5,921567 | 3,03E-07  |
| KLB      | 5,909587 | 0,000616  |
| TMEM37   | 5,898962 | 3,41E-23  |
| SERTAD4  | 5,887991 | 1,90E-28  |
| BCAT1    | 5,876122 | 5,20E-05  |
| FAM92A1  | 5,867823 | 1,67E-10  |
| EFCAB6   | 5,855288 | 0,000769  |
| FZD1     | 5,848969 | 2,18E-37  |
| DCDC2    | 5,846172 | 9,82E-24  |
| TACSTD2  | 5,8362   | 3,35E-76  |
| FES      | 5,829763 | 5,29E-05  |
| TP73     | 5,802755 | 7,34E-09  |



|           |          |          |
|-----------|----------|----------|
| NDRG2     | 5,799418 | 2,12E-19 |
| TINCR     | 5,785377 | 1,19E-15 |
| CPQ       | 5,763506 | 0,00102  |
| DLGAP3    | 5,749514 | 5,32E-16 |
| NRXN2     | 5,721699 | 1,83E-18 |
| WNT5A     | 5,691117 | 4,07E-28 |
| CACNA1H   | 5,683928 | 4,40E-43 |
| ETNK2     | 5,670038 | 4,76E-29 |
| COLCA1    | 5,669701 | 0,000182 |
| RORA      | 5,665765 | 3,94E-33 |
| FOXA1     | 5,664251 | 4,32E-98 |
| FOXO6     | 5,642924 | 1,11E-08 |
| RGS17     | 5,629693 | 8,75E-05 |
| PCDHA7    | 5,628619 | 6,92E-10 |
| RTN1      | 5,621732 | 5,62E-06 |
| GPLD1     | 5,621103 | 5,47E-08 |
| KCNN1     | 5,596852 | 0,000125 |
| FBXO17    | 5,589271 | 1,85E-24 |
| LINC00341 | 5,583743 | 0,000193 |
| SPEG      | 5,555755 | 0,000307 |
| KYNU      | 5,547324 | 5,64E-30 |
| TNS1      | 5,536725 | 4,06E-14 |
| ATP2A3    | 5,532488 | 2,76E-05 |
| AMZ1      | 5,521297 | 2,58E-05 |
| METTL7A   | 5,502656 | 8,14E-06 |
| ATRNL1    | 5,499077 | 7,03E-05 |
| ZNF329    | 5,495939 | 1,86E-21 |
| TGM1      | 5,489321 | 5,05E-08 |
| PBX1      | 5,486562 | 7,58E-28 |
| PKIB      | 5,483303 | 6,99E-56 |
| TMCC2     | 5,476731 | 1,01E-08 |
| PCDHGA5   | 5,474994 | 0,000133 |
| RASSF10   | 5,464319 | 1,52E-07 |
| BMP7      | 5,464109 | 1,05E-46 |
| C1orf115  | 5,449669 | 5,64E-16 |
| SOX18     | 5,440319 | 8,38E-06 |
| MRC2      | 5,437823 | 8,88E-06 |
| PRKAR2B   | 5,435158 | 6,44E-21 |
| PCDHGA4   | 5,406775 | 0,000158 |
| TFF3      | 5,391887 | 1,68E-14 |
| MAPK4     | 5,389758 | 3,92E-06 |
| DKK1      | 5,387622 | 9,63E-19 |
| LRRN1     | 5,386697 | 1,84E-08 |
| TLX1NB    | 5,386204 | 0,000762 |
| RUNDC3A   | 5,378221 | 7,04E-05 |
| HOXC13    | 5,376712 | 5,82E-23 |
| SOBP      | 5,360705 | 8,52E-06 |
| RAB27B    | 5,347071 | 6,03E-21 |
| EDN1      | 5,335994 | 1,80E-19 |
| HECW2     | 5,318945 | 3,67E-18 |

|           |          |           |
|-----------|----------|-----------|
| BEND7     | 5,318238 | 5,28E-05  |
| LOC90768  | 5,298414 | 3,49E-06  |
| SALL2     | 5,287805 | 5,50E-11  |
| SCN4A     | 5,283844 | 3,75E-11  |
| TFAP2A    | 5,267704 | 1,21E-113 |
| CNIH2     | 5,253875 | 5,34E-24  |
| DIP2C     | 5,252018 | 3,70E-28  |
| LINC01006 | 5,242588 | 4,93E-06  |
| ZFP2      | 5,230917 | 0,000807  |
| TOX2      | 5,230143 | 2,49E-09  |
| LHX4      | 5,196891 | 1,93E-28  |
| ZDBF2     | 5,165989 | 2,54E-08  |
| LAMC3     | 5,139259 | 0,000676  |
| ZNF563    | 5,131398 | 1,08E-05  |
| ASAP3     | 5,113202 | 2,07E-21  |
| TUBB4A    | 5,110985 | 3,20E-08  |
| LOX       | 5,078282 | 4,45E-05  |
| ODAM      | 5,077867 | 1,21E-18  |
| PHLDB1    | 5,07498  | 6,43E-25  |
| SYTL2     | 5,073312 | 2,16E-60  |
| IGSF9     | 5,070851 | 6,66E-76  |
| RDH16     | 5,068877 | 9,45E-21  |
| ATP8B2    | 5,06563  | 2,49E-15  |
| MRAS      | 5,05615  | 1,92E-10  |
| TNFRSF18  | 5,02375  | 1,17E-05  |
| GPC4      | 5,021648 | 1,06E-12  |
| KLHDC7B   | 5,013342 | 1,62E-11  |
| LINGO1    | 4,96926  | 3,58E-21  |
| ZNF391    | 4,968052 | 1,10E-10  |
| LYSMD2    | 4,963355 | 7,14E-40  |
| CERS1     | 4,963319 | 0,000516  |
| NTN1      | 4,955941 | 2,97E-09  |
| ABCA3     | 4,951011 | 3,08E-27  |
| FRMD6-AS1 | 4,935116 | 5,50E-05  |
| ABCB4     | 4,928198 | 3,45E-05  |
| SPATA17   | 4,927835 | 1,06E-16  |
| LONRF2    | 4,927798 | 6,89E-23  |
| REPS2     | 4,926057 | 2,10E-08  |
| LRRC75B   | 4,924503 | 7,90E-08  |
| TGFBR3L   | 4,921782 | 3,54E-09  |
| LARP6     | 4,917192 | 8,19E-10  |
| RNF165    | 4,913363 | 7,03E-05  |
| CADM1     | 4,897241 | 1,14E-38  |
| EPHA4     | 4,882977 | 6,57E-05  |
| TP53      | 4,849375 | 1,99E-30  |
| ADAM32    | 4,845566 | 0,000712  |
| TUSC3     | 4,836625 | 8,30E-44  |
| MAST1     | 4,833614 | 6,99E-15  |
| WSCD1     | 4,826726 | 1,34E-15  |
| SLCO3A1   | 4,794794 | 1,27E-08  |

|           |          |          |
|-----------|----------|----------|
| TBC1D9    | 4,779957 | 1,17E-51 |
| HID1      | 4,768699 | 3,67E-31 |
| PRDM6     | 4,752531 | 8,62E-10 |
| FAM46C    | 4,748671 | 2,97E-12 |
| FEZ1      | 4,742223 | 8,85E-06 |
| TET1      | 4,714883 | 1,47E-11 |
| RASL11B   | 4,711811 | 2,47E-10 |
| BMF       | 4,705077 | 5,35E-07 |
| FARP1     | 4,6825   | 6,86E-22 |
| RPRM      | 4,678249 | 4,14E-05 |
| BCAS3     | 4,676764 | 4,61E-52 |
| NXPH4     | 4,674437 | 1,32E-25 |
| SOX2      | 4,664417 | 1,22E-17 |
| ZNF362    | 4,638846 | 3,08E-31 |
| ADGRB1    | 4,622913 | 2,23E-22 |
| ALG1L     | 4,607292 | 1,02E-16 |
| DPYSL5    | 4,602126 | 7,01E-17 |
| DNALI1    | 4,599464 | 0,000186 |
| FLVCR2    | 4,595563 | 3,43E-10 |
| EWSAT1    | 4,594228 | 0,000931 |
| MUC5B     | 4,592407 | 1,74E-10 |
| KIF1A     | 4,589605 | 9,48E-31 |
| SUSD3     | 4,587369 | 3,12E-11 |
| OGFRL1    | 4,586969 | 1,53E-17 |
| TCEAL3    | 4,585979 | 4,33E-24 |
| FAM134B   | 4,585154 | 1,54E-10 |
| ZNF185    | 4,575686 | 2,01E-23 |
| SYT17     | 4,570557 | 3,42E-23 |
| RUNDC3A-  | 4,567833 | 1,67E-07 |
| IRX5      | 4,565692 | 1,28E-29 |
| ZNF836    | 4,561731 | 2,75E-14 |
| LOXL2     | 4,548841 | 2,71E-05 |
| XKRX      | 4,535316 | 0,000556 |
| SLC22A23  | 4,519086 | 7,97E-61 |
| SYNGR1    | 4,511685 | 1,85E-10 |
| GLDC      | 4,494997 | 0,000723 |
| RIMKLB    | 4,488087 | 6,13E-28 |
| TMOD2     | 4,480643 | 7,50E-17 |
| SPATA18   | 4,472045 | 3,10E-06 |
| ZBTB10    | 4,466462 | 8,08E-39 |
| FLRT3     | 4,462918 | 2,23E-27 |
| NEO1      | 4,454664 | 5,41E-33 |
| TUBA1A    | 4,454247 | 5,32E-65 |
| NKAIN1    | 4,437615 | 9,09E-19 |
| PTPRG-AS1 | 4,431666 | 9,77E-07 |
| IGSF10    | 4,430641 | 0,000171 |
| GPNMB     | 4,425842 | 1,28E-23 |
| TIAM2     | 4,425809 | 0,000106 |
| CEL       | 4,422717 | 3,58E-06 |
| ENTPD1    | 4,386912 | 1,81E-08 |

|            |          |          |
|------------|----------|----------|
| ZNF461     | 4,363395 | 5,45E-08 |
| CDH3       | 4,358288 | 4,84E-77 |
| ZNF544     | 4,338758 | 2,28E-38 |
| MT1F       | 4,328796 | 9,99E-07 |
| SOX4       | 4,326201 | 2,78E-66 |
| THNSL2     | 4,318546 | 1,44E-13 |
| CIART      | 4,306328 | 5,42E-12 |
| HLA-DQB1   | 4,304344 | 9,07E-07 |
| EXO5       | 4,300858 | 3,50E-15 |
| PACSIN3    | 4,300296 | 3,08E-44 |
| NEB        | 4,297578 | 2,19E-15 |
| C10orf82   | 4,296451 | 0,000234 |
| TANC2      | 4,287206 | 4,70E-31 |
| ZCCHC12    | 4,286018 | 2,47E-06 |
| MDH1B      | 4,283069 | 5,92E-05 |
| SYNE3      | 4,277814 | 9,86E-05 |
| TRIB2      | 4,272892 | 1,82E-05 |
| MAMLD1     | 4,267255 | 3,03E-05 |
| ZNF137P    | 4,257916 | 6,83E-05 |
| RGAG4      | 4,245061 | 3,77E-07 |
| UCP2       | 4,24079  | 5,84E-15 |
| LINC01132  | 4,228442 | 8,87E-05 |
| RPS6KA2    | 4,223879 | 1,20E-08 |
| KRT81      | 4,213545 | 3,36E-06 |
| THSD4      | 4,203162 | 1,18E-17 |
| SERPINA3   | 4,202073 | 0,000335 |
| NOTCH3     | 4,196798 | 1,92E-56 |
| PDGFRL     | 4,193585 | 5,50E-05 |
| GRIP1      | 4,187697 | 7,69E-11 |
| QPCT       | 4,182634 | 5,09E-05 |
| AK4        | 4,17254  | 1,10E-37 |
| GNG13      | 4,144234 | 1,56E-05 |
| ARHGAP4    | 4,139802 | 1,26E-09 |
| C1QL1      | 4,139549 | 0,00041  |
| GLIS2      | 4,134539 | 1,14E-18 |
| P2RX4      | 4,13289  | 7,14E-40 |
| TAF15      | 4,126972 | 8,42E-15 |
| HEATR6     | 4,1237   | 2,86E-66 |
| LCA5L      | 4,12297  | 0,000595 |
| LINC00992  | 4,1082   | 6,57E-07 |
| NKX3-1     | 4,107863 | 5,54E-05 |
| RBPMS2     | 4,092412 | 2,37E-08 |
| DMC1       | 4,088597 | 0,000376 |
| APPBP2     | 4,083429 | 9,16E-71 |
| PFDN4      | 4,078863 | 4,55E-72 |
| KRTAP5-AS  | 4,077875 | 1,63E-07 |
| SLC26A4-A' | 4,061913 | 5,08E-06 |
| GLUD2      | 4,060401 | 2,96E-15 |
| CMYA5      | 4,053345 | 0,000273 |
| ALDH5A1    | 4,051948 | 1,15E-22 |

|          |          |          |
|----------|----------|----------|
| PROCA1   | 4,045179 | 0,000399 |
| PRKCH    | 4,032917 | 8,75E-22 |
| CCNG2    | 4,03043  | 5,37E-15 |
| ZNF83    | 4,015756 | 8,39E-28 |
| KREMEN2  | 4,010571 | 1,20E-29 |
| BACE2    | 4,003597 | 4,77E-28 |
| MID2     | 4,00207  | 4,98E-17 |
| PPP2R3A  | 4,001163 | 3,08E-16 |
| TUBB2B   | 4,00088  | 1,51E-15 |
| LYPD3    | 4,000823 | 5,72E-12 |
| TRIM37   | 3,992522 | 7,77E-78 |
| MAP10    | 3,991093 | 0,000301 |
| CCDC74B  | 3,990957 | 0,000132 |
| NUP210   | 3,964997 | 5,14E-33 |
| DNAH5    | 3,946467 | 0,000648 |
| SIX4     | 3,941048 | 6,24E-17 |
| ADAMTS19 | 3,93981  | 9,32E-05 |
| DBN1     | 3,936569 | 1,97E-53 |
| CENPF    | 3,930794 | 2,88E-20 |
| TRAPPC6A | 3,921714 | 1,07E-26 |
| BCL11B   | 3,907685 | 3,90E-40 |
| LRP3     | 3,903826 | 3,30E-27 |
| ZNF419   | 3,901773 | 1,11E-09 |
| TMEM254- | 3,900988 | 1,55E-06 |
| GATS     | 3,880031 | 4,10E-14 |
| KNDC1    | 3,876653 | 4,77E-09 |
| NCOA3    | 3,869672 | 2,02E-51 |
| NODAL    | 3,864341 | 0,000436 |
| CTXN1    | 3,86369  | 6,19E-22 |
| PPP2R2C  | 3,860183 | 2,32E-51 |
| LMCD1    | 3,858246 | 4,46E-05 |
| PKIG     | 3,854807 | 3,66E-20 |
| BRIP1    | 3,85372  | 1,66E-55 |
| FAM213A  | 3,837256 | 1,37E-32 |
| EMP2     | 3,836016 | 1,93E-22 |
| PBXIP1   | 3,833958 | 2,24E-10 |
| SHANK2   | 3,830778 | 8,68E-14 |
| FAM69B   | 3,82742  | 4,32E-06 |
| ACBD7    | 3,823734 | 7,02E-13 |
| NUAK1    | 3,8205   | 1,17E-18 |
| RASSF5   | 3,819554 | 8,31E-05 |
| ZNF701   | 3,818534 | 2,83E-20 |
| GCNT1    | 3,809994 | 2,08E-22 |
| FGFR2    | 3,802247 | 0,000129 |
| DHTKD1   | 3,800078 | 1,52E-45 |
| NANOS1   | 3,799337 | 1,32E-21 |
| KSR2     | 3,790668 | 1,37E-08 |
| RBM24    | 3,781744 | 9,12E-07 |
| USP32    | 3,776734 | 1,86E-31 |
| SERHL2   | 3,776234 | 0,001004 |

|           |          |          |
|-----------|----------|----------|
| HLA-DRB5  | 3,767918 | 0,000354 |
| N4BP3     | 3,763073 | 3,80E-19 |
| ARHGAP44  | 3,759288 | 3,10E-15 |
| ZNF730    | 3,744287 | 9,07E-07 |
| ZNF347    | 3,744054 | 3,87E-05 |
| IFITM3    | 3,741253 | 1,93E-19 |
| PPM1D     | 3,73826  | 2,48E-53 |
| ZNF354A   | 3,736206 | 1,69E-26 |
| OSR2      | 3,733517 | 7,53E-12 |
| ATP9A     | 3,705801 | 6,35E-42 |
| PGBD5     | 3,703144 | 6,28E-06 |
| SECTM1    | 3,701678 | 2,97E-09 |
| SIAH2     | 3,699057 | 4,17E-38 |
| HCN2      | 3,691728 | 4,07E-14 |
| TTLL7     | 3,690754 | 3,28E-06 |
| RHOV      | 3,689775 | 1,26E-11 |
| LTBP2     | 3,6888   | 0,000103 |
| ZFYVE28   | 3,679165 | 1,00E-14 |
| SMKR1     | 3,677918 | 7,73E-11 |
| ZMIZ1     | 3,656902 | 1,09E-39 |
| REEP2     | 3,652033 | 0,000532 |
| PIAS3     | 3,635875 | 1,69E-46 |
| PALM      | 3,633318 | 2,17E-12 |
| ACACB     | 3,632531 | 2,56E-22 |
| FAM46B    | 3,629309 | 4,78E-08 |
| MVB12B    | 3,62543  | 3,97E-17 |
| SPEF2     | 3,622356 | 4,68E-07 |
| PLCG1-AS1 | 3,610758 | 0,000195 |
| AIF1L     | 3,602814 | 1,71E-31 |
| NGFRAP1   | 3,602228 | 2,17E-35 |
| TTC25     | 3,58829  | 0,000172 |
| BCAS4     | 3,581032 | 1,14E-13 |
| BOLA1     | 3,571767 | 5,07E-21 |
| TEAD2     | 3,567779 | 1,65E-23 |
| KLRG2     | 3,564764 | 2,06E-06 |
| KRBA2     | 3,564348 | 9,65E-05 |
| HSD17B14  | 3,548252 | 6,72E-05 |
| KRTAP3-1  | 3,544726 | 1,66E-07 |
| PGM2L1    | 3,53513  | 5,82E-26 |
| SEPT3     | 3,534524 | 7,76E-11 |
| GMPR      | 3,534474 | 0,000149 |
| TPBG      | 3,520187 | 9,57E-37 |
| SEMA3C    | 3,516113 | 2,71E-56 |
| SMAD9     | 3,515815 | 0,000181 |
| SCIN      | 3,512597 | 0,000595 |
| GAMT      | 3,512565 | 2,79E-10 |
| STARD13   | 3,510438 | 2,76E-15 |
| LYRM9     | 3,507442 | 7,29E-06 |
| RND2      | 3,50726  | 3,80E-10 |
| PGBD1     | 3,498906 | 1,64E-12 |

|           |          |          |
|-----------|----------|----------|
| NRSN2     | 3,496312 | 3,18E-10 |
| TSPEAR    | 3,491174 | 4,24E-06 |
| NOVA1     | 3,48613  | 1,56E-07 |
| SSBP2     | 3,485068 | 7,06E-07 |
| NSUN7     | 3,477035 | 2,77E-07 |
| CERS4     | 3,472483 | 9,79E-14 |
| ZNF217    | 3,470225 | 1,80E-52 |
| IGFBP4    | 3,464506 | 6,85E-14 |
| CREB3L4   | 3,459205 | 1,62E-20 |
| PRRT3     | 3,454306 | 2,41E-06 |
| PLOD2     | 3,448753 | 1,51E-25 |
| MARC2     | 3,44589  | 0,000123 |
| FAM200A   | 3,439047 | 1,60E-13 |
| CXCR4     | 3,4389   | 2,23E-09 |
| AMOTL2    | 3,435307 | 1,45E-12 |
| SRRM3     | 3,426154 | 0,000186 |
| ESPN      | 3,422075 | 5,83E-10 |
| C16orf74  | 3,421662 | 8,58E-06 |
| CCDC74A   | 3,417418 | 6,05E-06 |
| NRXN3     | 3,392851 | 6,87E-07 |
| LOC101925 | 3,391135 | 8,26E-06 |
| MYH7B     | 3,390372 | 0,000749 |
| SLAIN1    | 3,373638 | 1,14E-07 |
| DNAJC6    | 3,371039 | 0,000144 |
| P2RY2     | 3,369116 | 1,79E-22 |
| TP53TG1   | 3,367419 | 1,45E-19 |
| EFCAB11   | 3,363009 | 3,18E-15 |
| HSPB1     | 3,361526 | 6,44E-37 |
| COL5A2    | 3,360114 | 0,000288 |
| DFNB31    | 3,35604  | 1,26E-15 |
| H2AFY2    | 3,354626 | 2,16E-25 |
| ARRB1     | 3,352901 | 3,12E-08 |
| STARD10   | 3,348332 | 7,23E-16 |
| PVRL4     | 3,34615  | 1,70E-20 |
| MSRB2     | 3,333633 | 1,24E-29 |
| MPP7      | 3,329544 | 5,20E-28 |
| DYNC2H1   | 3,328349 | 2,81E-10 |
| GADD45G   | 3,326015 | 1,83E-06 |
| FAM102B   | 3,313243 | 8,60E-19 |
| NEK11     | 3,308425 | 3,97E-08 |
| IPO5P1    | 3,303694 | 7,39E-12 |
| PRSS27    | 3,286459 | 0,000313 |
| FIBCD1    | 3,275318 | 5,41E-06 |
| GGT7      | 3,274343 | 2,23E-08 |
| LMX1B     | 3,272542 | 6,03E-13 |
| GSTA4     | 3,26758  | 3,01E-11 |
| MMP11     | 3,25673  | 0,000178 |
| PNRC1     | 3,255557 | 1,25E-20 |
| MCAM      | 3,253561 | 5,08E-06 |
| ISM1      | 3,249082 | 3,42E-06 |

|           |          |          |
|-----------|----------|----------|
| GSTM4     | 3,248234 | 2,04E-13 |
| LRRC37A8F | 3,246597 | 0,000122 |
| CNTNAP2   | 3,240128 | 3,71E-06 |
| TOB2P1    | 3,236712 | 0,000687 |
| SIX1      | 3,235503 | 3,40E-16 |
| FXYD3     | 3,22392  | 3,03E-08 |
| NR3C1     | 3,223591 | 1,38E-32 |
| TMEM132A  | 3,223147 | 1,11E-21 |
| BCL2      | 3,223014 | 4,45E-08 |
| SCAMP5    | 3,213437 | 1,44E-11 |
| DDB2      | 3,211523 | 1,78E-15 |
| C1QTNF9B  | 3,208989 | 8,04E-10 |
| CA12      | 3,206875 | 2,16E-07 |
| C1QTNF6   | 3,19642  | 0,000661 |
| PCDHB14   | 3,192614 | 4,11E-15 |
| PSMD6     | 3,192208 | 3,39E-38 |
| ATP6V1C2  | 3,191885 | 1,43E-09 |
| PNMA1     | 3,191298 | 1,85E-26 |
| GLUL      | 3,188266 | 1,15E-42 |
| CD82      | 3,187017 | 2,02E-12 |
| RAB26     | 3,180629 | 2,19E-06 |
| DYRK1B    | 3,179948 | 2,14E-22 |
| SOCS3     | 3,17428  | 4,48E-07 |
| RAD51C    | 3,172116 | 8,64E-45 |
| ZNF420    | 3,169459 | 1,43E-09 |
| HHAT      | 3,166945 | 8,43E-06 |
| C1orf53   | 3,162992 | 1,05E-05 |
| SMPDL3B   | 3,162871 | 5,93E-24 |
| NPTXR     | 3,161754 | 1,23E-09 |
| C15orf65  | 3,158533 | 9,81E-06 |
| FZD3      | 3,154926 | 8,67E-16 |
| SHANK1    | 3,138707 | 0,000975 |
| ZNF160    | 3,13824  | 1,03E-20 |
| APCDD1    | 3,133616 | 7,54E-20 |
| SAMD11    | 3,132468 | 2,01E-06 |
| CDKN1A    | 3,12997  | 3,35E-09 |
| ANKRD34A  | 3,129885 | 3,22E-05 |
| WNT11     | 3,114251 | 7,01E-06 |
| B3GALNT1  | 3,114232 | 4,48E-13 |
| ISYNA1    | 3,113702 | 9,33E-34 |
| FCMR      | 3,11322  | 0,000132 |
| TXNIP     | 3,112104 | 3,12E-07 |
| ZNF253    | 3,106338 | 1,59E-21 |
| DTX3      | 3,103245 | 1,51E-17 |
| ATP5G2    | 3,100831 | 4,99E-44 |
| TDRKH     | 3,098938 | 1,25E-14 |
| KRT7      | 3,097467 | 1,32E-05 |
| H1FO      | 3,093938 | 1,08E-10 |
| ZNF17     | 3,086943 | 9,20E-07 |
| DHRS2     | 3,084721 | 9,76E-15 |



|           |          |          |
|-----------|----------|----------|
| CASC10    | 3,079259 | 5,45E-06 |
| RARG      | 3,075468 | 5,57E-21 |
| FGD1      | 3,070552 | 1,08E-17 |
| NDRG4     | 3,066473 | 2,74E-07 |
| STARD5    | 3,056778 | 3,84E-05 |
| RASD1     | 3,055219 | 0,000491 |
| PCOLCE    | 3,048287 | 9,55E-08 |
| LYPD6B    | 3,046301 | 0,000146 |
| PYROXD2   | 3,044247 | 3,15E-06 |
| REEP1     | 3,039725 | 7,22E-05 |
| FAM214A   | 3,036617 | 3,06E-08 |
| FAM227B   | 3,027737 | 2,04E-09 |
| ZNF22     | 3,027504 | 1,56E-09 |
| ADA       | 3,014384 | 1,29E-08 |
| MYLIP     | 3,012435 | 4,30E-19 |
| HBP1      | 3,007389 | 3,19E-11 |
| BTG2      | 3,006228 | 2,77E-11 |
| XYLT1     | 3,002159 | 3,76E-08 |
| GAB1      | 3,001647 | 1,51E-11 |
| ERV3-1    | 2,995173 | 1,05E-15 |
| RBBP8NL   | 2,990356 | 1,83E-12 |
| ZNRF1     | 2,984354 | 5,87E-23 |
| DUXAP8    | 2,984337 | 7,70E-09 |
| PBLD      | 2,976091 | 1,75E-08 |
| GPX8      | 2,97533  | 3,72E-15 |
| CBLB      | 2,972157 | 6,67E-20 |
| TUBD1     | 2,971367 | 3,67E-20 |
| ZNF561-AS | 2,968359 | 4,73E-06 |
| GRHL3     | 2,966025 | 5,50E-09 |
| ZNF416    | 2,962409 | 6,42E-07 |
| MTERF1    | 2,962204 | 1,82E-09 |
| RHOB      | 2,960606 | 5,07E-21 |
| ZSCAN16   | 2,956792 | 3,05E-17 |
| ASAH2     | 2,954174 | 8,57E-12 |
| MDK       | 2,947095 | 1,55E-36 |
| WNT7B     | 2,946124 | 5,19E-10 |
| ZNF493    | 2,941468 | 0,000226 |
| CAP2      | 2,94117  | 4,43E-16 |
| TEX9      | 2,940523 | 9,83E-08 |
| KDM5B     | 2,936557 | 3,09E-20 |
| PLD1      | 2,935034 | 0,000153 |
| DDAH2     | 2,934175 | 1,95E-22 |
| PTP4A3    | 2,931072 | 4,18E-10 |
| PCBP3     | 2,90827  | 1,92E-06 |
| PKP1      | 2,906117 | 5,38E-06 |
| EIF4E3    | 2,905793 | 5,41E-09 |
| ZBTB12    | 2,904559 | 4,78E-08 |
| SYNE2     | 2,903208 | 3,71E-21 |
| ZFP14     | 2,894019 | 6,43E-08 |
| PPAP2A    | 2,893362 | 1,03E-10 |

|          |          |          |
|----------|----------|----------|
| CACNB3   | 2,884591 | 6,24E-23 |
| FAM174B  | 2,883962 | 6,49E-09 |
| CHD6     | 2,881746 | 8,01E-29 |
| MATN2    | 2,88107  | 2,11E-13 |
| GALNT6   | 2,877504 | 5,44E-14 |
| PITPNC1  | 2,874877 | 2,00E-31 |
| PTGES    | 2,874375 | 3,72E-06 |
| CCDC170  | 2,868838 | 1,95E-06 |
| ARMCX6   | 2,866482 | 8,45E-07 |
| CD24     | 2,860954 | 4,93E-23 |
| TTC7B    | 2,860696 | 3,13E-09 |
| UTRN     | 2,860351 | 2,71E-08 |
| FTCDNL1  | 2,85735  | 0,000472 |
| ARHGEF28 | 2,854524 | 4,38E-12 |
| TRIM24   | 2,848741 | 1,73E-30 |
| WASF3    | 2,847842 | 2,68E-12 |
| DNAH3    | 2,846155 | 0,000609 |
| ARSG     | 2,845817 | 7,58E-10 |
| ZNF816   | 2,841899 | 4,09E-09 |
| FERMT2   | 2,838863 | 3,69E-14 |
| SLC4A3   | 2,834216 | 0,000781 |
| CRNDE    | 2,832147 | 8,43E-08 |
| ZNF134   | 2,83106  | 9,76E-12 |
| HOMER2   | 2,828664 | 1,50E-14 |
| C2orf76  | 2,816085 | 1,92E-07 |
| ZNF821   | 2,815238 | 1,54E-07 |
| SOX13    | 2,808846 | 1,08E-12 |
| BLVRA    | 2,808435 | 2,72E-19 |
| FAXC     | 2,805654 | 9,16E-05 |
| CRISPLD2 | 2,805106 | 4,04E-07 |
| MAN2B1   | 2,802596 | 3,80E-22 |
| GSTZ1    | 2,792411 | 3,28E-20 |
| PARD6G   | 2,792119 | 5,77E-05 |
| TCF7L1   | 2,791079 | 2,58E-06 |
| CDYL2    | 2,787374 | 6,04E-06 |
| PDE3B    | 2,787257 | 2,16E-07 |
| IDH2     | 2,787106 | 6,55E-19 |
| HK1      | 2,786604 | 8,75E-13 |
| LRRC73   | 2,77915  | 9,86E-06 |
| FBXO27   | 2,779073 | 4,62E-10 |
| SIPA1L2  | 2,77562  | 7,58E-17 |
| WWTR1    | 2,769239 | 8,47E-12 |
| FAM129A  | 2,768904 | 4,70E-06 |
| PKD3     | 2,766403 | 2,92E-08 |
| NAAA     | 2,764698 | 2,14E-12 |
| ZSCAN2   | 2,762822 | 1,79E-19 |
| SOCS1    | 2,76062  | 8,99E-09 |
| HES2     | 2,756902 | 0,000365 |
| ADIRF    | 2,749415 | 2,05E-06 |
| ZNF211   | 2,740162 | 1,24E-05 |

|           |          |          |
|-----------|----------|----------|
| C20orf194 | 2,739144 | 9,53E-05 |
| TUBB6     | 2,735056 | 5,92E-20 |
| SLC9A6    | 2,734531 | 9,83E-08 |
| SLC25A29  | 2,732661 | 6,09E-16 |
| PRSS23    | 2,729069 | 7,25E-17 |
| ZNF467    | 2,726141 | 2,93E-21 |
| RPS6KB1   | 2,725349 | 1,48E-32 |
| FAM212B   | 2,718456 | 6,59E-09 |
| CCT6B     | 2,715586 | 0,000402 |
| WDR83OS   | 2,715547 | 1,17E-28 |
| PAR6B     | 2,715358 | 2,85E-19 |
| PYCARD    | 2,714908 | 2,48E-09 |
| SEMA7A    | 2,713161 | 8,26E-11 |
| RAB13     | 2,696139 | 1,45E-18 |
| MAP3K12   | 2,692694 | 1,52E-05 |
| ECI2      | 2,679857 | 3,54E-09 |
| RAB36     | 2,678356 | 0,000223 |
| SBK1      | 2,675387 | 6,18E-18 |
| RBM43     | 2,666837 | 8,15E-05 |
| FGFR1     | 2,665442 | 3,87E-09 |
| ZNF808    | 2,665439 | 1,54E-07 |
| GNAS      | 2,654304 | 1,33E-33 |
| PCSK6     | 2,651624 | 3,15E-14 |
| BCL6      | 2,643224 | 4,05E-12 |
| PCDHB9    | 2,642044 | 9,23E-07 |
| TCTN1     | 2,639291 | 7,17E-14 |
| LITAF     | 2,635207 | 1,87E-15 |
| FGD3      | 2,631148 | 2,10E-06 |
| BCAS2     | 2,628694 | 2,13E-32 |
| IFT22     | 2,627567 | 2,04E-18 |
| SHOX2     | 2,62008  | 0,000507 |
| LINC00674 | 2,616771 | 6,32E-19 |
| BCORL1    | 2,614606 | 2,52E-11 |
| ZNF219    | 2,613443 | 4,48E-16 |
| TSPAN31   | 2,612744 | 1,02E-08 |
| SNHG5     | 2,612563 | 1,11E-06 |
| SELENBP1  | 2,611229 | 1,90E-10 |
| ARHGEF37  | 2,611034 | 0,000154 |
| B4GALNT1  | 2,607819 | 2,05E-07 |
| ZNF254    | 2,606751 | 1,45E-14 |
| SLC29A4   | 2,603275 | 2,28E-07 |
| RNF122    | 2,583732 | 9,20E-05 |
| YBX2      | 2,581425 | 2,98E-15 |
| GPSM1     | 2,566609 | 8,74E-08 |
| NHP2      | 2,564659 | 3,18E-32 |
| ULK1      | 2,559608 | 8,53E-21 |
| ENDOV     | 2,55769  | 5,62E-13 |
| TMEM191   | 2,556919 | 2,43E-10 |
| ZNF749    | 2,554531 | 1,17E-05 |
| KRT18     | 2,552295 | 1,33E-09 |

|           |          |          |
|-----------|----------|----------|
| CBX2      | 2,551435 | 3,34E-23 |
| TTC28     | 2,543847 | 0,000117 |
| RAB3D     | 2,53657  | 3,65E-15 |
| SNTA1     | 2,535813 | 1,04E-06 |
| CYB561    | 2,532358 | 2,15E-30 |
| ARHGEF25  | 2,530634 | 0,000275 |
| ZSWIM4    | 2,52912  | 1,30E-07 |
| SNX24     | 2,529106 | 5,42E-10 |
| DHRS13    | 2,528563 | 1,10E-10 |
| ITPKB     | 2,525349 | 4,62E-10 |
| ZNF818P   | 2,520988 | 1,03E-05 |
| COL18A1   | 2,516747 | 6,90E-08 |
| LINC00886 | 2,515911 | 6,63E-05 |
| ZNF417    | 2,515303 | 5,68E-06 |
| ABAT      | 2,507121 | 0,000156 |
| INPP4B    | 2,501784 | 1,80E-11 |
| METRNL    | 2,500346 | 8,49E-15 |
| MT2A      | 2,499964 | 6,78E-11 |
| GATSL2    | 2,496212 | 6,46E-16 |
| DNLZ      | 2,486373 | 2,48E-16 |
| ZNF713    | 2,484095 | 9,42E-06 |
| ZNF776    | 2,483155 | 5,23E-10 |
| ZNF805    | 2,482935 | 1,36E-07 |
| RIMKLA    | 2,482478 | 0,000121 |
| LTBP1     | 2,48068  | 5,24E-20 |
| USP30     | 2,480328 | 6,28E-08 |
| ZNF117    | 2,466058 | 1,46E-05 |
| MYT1      | 2,46501  | 0,000258 |
| HNRNPA1L  | 2,464782 | 5,17E-07 |
| SDSL      | 2,463112 | 1,06E-08 |
| ZBTB42    | 2,461828 | 6,36E-12 |
| CSDE1     | 2,454135 | 1,86E-18 |
| C11orf80  | 2,451352 | 2,01E-09 |
| DHPS      | 2,450524 | 1,99E-16 |
| NFATC4    | 2,445749 | 0,000141 |
| ALDH4A1   | 2,440316 | 8,20E-06 |
| ITPR2     | 2,438    | 2,35E-11 |
| ARHGDIG   | 2,432534 | 5,75E-06 |
| KRT8      | 2,431907 | 7,21E-10 |
| CCDC176   | 2,429598 | 0,000336 |
| DNPH1     | 2,425328 | 1,77E-23 |
| PTK7      | 2,421709 | 1,60E-10 |
| CASKIN1   | 2,411922 | 2,33E-08 |
| SLC27A3   | 2,404896 | 3,93E-17 |
| TMEM183E  | 2,40258  | 3,20E-08 |
| ZNF431    | 2,399969 | 6,32E-05 |
| CAMK2N2   | 2,399208 | 1,18E-06 |
| WDYHV1    | 2,391546 | 1,38E-11 |
| PTPRS     | 2,391068 | 3,56E-15 |
| DNMT3B    | 2,387811 | 2,13E-16 |

|          |          |          |
|----------|----------|----------|
| DISP1    | 2,386692 | 2,92E-07 |
| FAM117A  | 2,38522  | 3,96E-08 |
| MEX3A    | 2,377623 | 4,28E-24 |
| WDR83    | 2,375892 | 1,93E-14 |
| DLC1     | 2,374266 | 2,69E-09 |
| PRMT6    | 2,365528 | 9,44E-23 |
| DTWD1    | 2,365255 | 9,69E-11 |
| IDNK     | 2,363868 | 3,19E-07 |
| TLE1     | 2,362141 | 1,47E-11 |
| HMG20B   | 2,359172 | 2,96E-26 |
| PLXNB3   | 2,356226 | 9,47E-08 |
| LGALS1   | 2,349806 | 6,60E-11 |
| TNNT1    | 2,348936 | 2,66E-18 |
| NR4A1    | 2,347358 | 6,31E-06 |
| UST      | 2,346484 | 9,10E-05 |
| ZFHX3    | 2,34641  | 8,60E-13 |
| ZBTB22   | 2,345303 | 6,46E-10 |
| PRDX2    | 2,34525  | 9,93E-22 |
| SLC4A8   | 2,337022 | 0,000958 |
| NPDC1    | 2,336853 | 3,05E-24 |
| GABPB1   | 2,334416 | 1,25E-14 |
| FBXW9    | 2,333834 | 9,86E-15 |
| FYTTD1   | 2,331897 | 1,04E-16 |
| DTD1     | 2,329833 | 3,75E-17 |
| GAA      | 2,325095 | 2,36E-14 |
| MXD4     | 2,324049 | 4,88E-06 |
| ZNF627   | 2,323765 | 1,10E-13 |
| HKR1     | 2,320513 | 1,02E-10 |
| MFSD3    | 2,313093 | 3,19E-17 |
| PLEKHF2  | 2,312427 | 2,35E-17 |
| MXD3     | 2,308563 | 5,82E-09 |
| RPS27L   | 2,308343 | 2,48E-05 |
| HDAC5    | 2,307794 | 1,88E-05 |
| MPP2     | 2,304446 | 0,000728 |
| CTNNBIP1 | 2,301807 | 8,13E-12 |
| CIR1     | 2,301055 | 3,15E-10 |
| TRERF1   | 2,299908 | 6,24E-08 |
| ZNF429   | 2,298158 | 3,45E-10 |
| SLC35E3  | 2,292109 | 2,34E-11 |
| SRD5A3   | 2,291593 | 1,14E-09 |
| STON2    | 2,284443 | 7,96E-13 |
| CSRP2    | 2,28367  | 1,64E-06 |
| WDR91    | 2,279584 | 8,64E-06 |
| DNAJC15  | 2,279567 | 1,84E-17 |
| ALDH7A1  | 2,27936  | 5,73E-18 |
| MOSPD3   | 2,277415 | 1,46E-07 |
| ILDR1    | 2,276773 | 1,06E-08 |
| GKAP1    | 2,270517 | 0,000226 |
| ZNF250   | 2,262772 | 3,56E-06 |
| NME4     | 2,253647 | 8,24E-20 |

|           |          |          |
|-----------|----------|----------|
| RNF130    | 2,248504 | 9,11E-13 |
| SH3BP5    | 2,240427 | 1,86E-13 |
| SH3BGR    | 2,238998 | 0,000137 |
| FDXR      | 2,237613 | 2,38E-05 |
| EPN3      | 2,23577  | 4,35E-12 |
| MAPK8IP1  | 2,232994 | 1,79E-06 |
| CKAP4     | 2,232416 | 3,36E-12 |
| POGZ      | 2,228105 | 4,61E-13 |
| NDST1     | 2,227985 | 4,49E-16 |
| LAMTOR4   | 2,22004  | 2,73E-15 |
| ZNF260    | 2,215268 | 1,60E-13 |
| GJA3      | 2,210487 | 7,03E-05 |
| SAMD15    | 2,207832 | 0,000736 |
| FAM127A   | 2,207774 | 8,35E-08 |
| LYPLAL1   | 2,199205 | 1,87E-06 |
| RAB27A    | 2,198021 | 2,24E-09 |
| ANAPC15   | 2,197509 | 8,51E-16 |
| RHOD      | 2,191067 | 6,98E-06 |
| EFNA1     | 2,188957 | 4,49E-06 |
| ASS1      | 2,187336 | 9,86E-08 |
| VPS72     | 2,185589 | 1,79E-11 |
| GSE1      | 2,185574 | 1,75E-23 |
| GTF2IRD2B | 2,185307 | 7,41E-09 |
| PMF1      | 2,181226 | 4,13E-07 |
| FBXL16    | 2,181189 | 2,39E-07 |
| SLC29A3   | 2,180647 | 8,56E-07 |
| KLHL24    | 2,179288 | 0,000479 |
| MFAP2     | 2,167298 | 2,16E-05 |
| PEX11B    | 2,153761 | 9,70E-13 |
| DCLRE1B   | 2,15372  | 1,11E-13 |
| SRGAP2B   | 2,153058 | 2,21E-05 |
| ZNF490    | 2,151701 | 6,76E-06 |
| RHPN1     | 2,151224 | 2,13E-05 |
| ISOC2     | 2,151222 | 3,33E-18 |
| LOC104968 | 2,144513 | 4,31E-05 |
| THOC7     | 2,143429 | 1,02E-20 |
| ZNF552    | 2,142129 | 2,74E-06 |
| FUT8      | 2,137003 | 2,06E-18 |
| SLC25A43  | 2,136744 | 3,43E-11 |
| SPIRE1    | 2,133833 | 1,09E-12 |
| HIGD2A    | 2,133229 | 1,11E-17 |
| F2R       | 2,132232 | 5,15E-05 |
| FLYWCH2   | 2,131743 | 3,66E-12 |
| FAM86B1   | 2,131722 | 0,000234 |
| PLXND1    | 2,13164  | 1,10E-06 |
| HOMER3    | 2,130591 | 2,42E-13 |
| OS9       | 2,129536 | 2,15E-18 |
| SLC37A4   | 2,122622 | 4,42E-17 |
| GPR161    | 2,121128 | 0,00013  |
| THBS3     | 2,120819 | 0,000546 |

|           |          |          |
|-----------|----------|----------|
| EPB41L4A- | 2,118958 | 2,70E-06 |
| C6orf48   | 2,118355 | 1,75E-06 |
| SPPL2A    | 2,115339 | 2,49E-17 |
| ZNF738    | 2,109887 | 5,20E-05 |
| COX6C     | 2,09558  | 2,21E-11 |
| PUS10     | 2,086103 | 0,000217 |
| LRFN1     | 2,082239 | 6,40E-06 |
| LRRC26    | 2,080896 | 1,40E-05 |
| CLU       | 2,079642 | 5,49E-07 |
| BCAM      | 2,077868 | 3,98E-12 |
| KRT10     | 2,075739 | 2,82E-09 |
| PDGFA     | 2,075346 | 2,15E-08 |
| ISL2      | 2,072901 | 0,000584 |
| PLCG1     | 2,072271 | 8,39E-18 |
| CCDC24    | 2,070105 | 5,88E-05 |
| ENSA      | 2,067002 | 3,40E-22 |
| TMEM187   | 2,065908 | 6,05E-06 |
| CUL9      | 2,065166 | 8,32E-07 |
| ESCO1     | 2,062777 | 3,78E-05 |
| ARG2      | 2,061054 | 1,74E-05 |
| ARVCF     | 2,055878 | 4,55E-10 |
| ZNF8      | 2,050378 | 6,05E-07 |
| PCDHB13   | 2,048269 | 1,16E-06 |
| NARF      | 2,045654 | 4,68E-07 |
| PXN-AS1   | 2,045486 | 8,11E-06 |
| S100A13   | 2,038286 | 6,76E-12 |
| PDCD4     | 2,032306 | 3,45E-12 |
| IFT46     | 2,030156 | 1,95E-13 |
| CCZ1B     | 2,030033 | 7,67E-14 |
| CCPG1     | 2,029847 | 1,41E-06 |
| CADM4     | 2,025767 | 2,24E-07 |
| PHPT1     | 2,02538  | 1,32E-15 |
| BBC3      | 2,023078 | 5,20E-05 |
| ZNF32     | 2,022669 | 5,13E-08 |
| NRSN2-AS1 | 2,022614 | 8,45E-06 |
| MYO5A     | 2,021996 | 5,06E-10 |
| LRRC49    | 2,021718 | 2,44E-05 |
| PRSS8     | 2,020649 | 7,00E-18 |
| HMGB3     | 2,017863 | 6,09E-18 |
| LY6E      | 2,016406 | 2,99E-09 |
| ZCWPW1    | 2,014113 | 0,000557 |
| RNF115    | 2,014    | 1,28E-14 |
| PIK3R3    | 2,013701 | 2,21E-08 |
| ASNA1     | 2,01055  | 1,09E-18 |
| SLC43A2   | 2,007973 | 3,55E-09 |
| ZNF468    | 2,006876 | 8,19E-11 |
| BFSP1     | 2,005436 | 0,000529 |
| KCTD1     | 2,000728 | 4,21E-09 |
| ACOX3     | 1,9977   | 2,49E-07 |
| TMEM64    | 1,997377 | 4,90E-15 |

|          |          |          |
|----------|----------|----------|
| RPS6KL1  | 1,996785 | 1,35E-05 |
| CELSR2   | 1,995212 | 2,99E-13 |
| DAAM1    | 1,988142 | 1,31E-12 |
| TEAD3    | 1,9826   | 5,69E-10 |
| TJP3     | 1,979691 | 9,07E-06 |
| PPP2R5E  | 1,974249 | 3,74E-17 |
| RPS2     | 1,97079  | 8,11E-16 |
| VPS9D1   | 1,970183 | 6,92E-05 |
| HRAS     | 1,967106 | 1,35E-08 |
| MRPS21   | 1,959055 | 2,79E-14 |
| KLHDC2   | 1,958773 | 4,06E-08 |
| CCDC167  | 1,958528 | 6,35E-06 |
| YPEL5    | 1,958386 | 6,42E-05 |
| COPG2    | 1,958028 | 1,10E-10 |
| ZNF428   | 1,949948 | 5,78E-07 |
| XBP1     | 1,946981 | 6,90E-06 |
| PPP1R21  | 1,945156 | 8,92E-07 |
| ITFG2    | 1,944346 | 6,66E-06 |
| ZNF771   | 1,938278 | 1,10E-05 |
| SFXN2    | 1,928422 | 1,20E-08 |
| CHMP6    | 1,927689 | 1,63E-07 |
| TRIQK    | 1,927487 | 2,33E-07 |
| RNF44    | 1,92263  | 1,80E-12 |
| RGS12    | 1,921546 | 4,56E-09 |
| ARID2    | 1,919605 | 6,62E-12 |
| ANK3     | 1,91607  | 2,22E-06 |
| FAM13B   | 1,910682 | 9,10E-05 |
| SOS2     | 1,910009 | 1,30E-09 |
| LRRC27   | 1,908426 | 0,000221 |
| PPOX     | 1,907633 | 0,000688 |
| RPL22L1  | 1,905042 | 1,59E-06 |
| SRGAP2   | 1,903865 | 1,30E-11 |
| ZNF512B  | 1,903693 | 6,55E-10 |
| C21orf33 | 1,901426 | 3,41E-09 |
| ZNF525   | 1,900837 | 2,38E-07 |
| KCTD15   | 1,900239 | 1,48E-05 |
| ATXN3    | 1,899224 | 4,70E-08 |
| PLXDC2   | 1,892896 | 1,69E-07 |
| RRBP1    | 1,892411 | 2,79E-08 |
| TBCK     | 1,891562 | 2,07E-09 |
| BHLHB9   | 1,890292 | 0,000381 |
| DSP      | 1,889995 | 6,30E-12 |
| BCYRN1   | 1,882195 | 8,94E-08 |
| ZNF669   | 1,881574 | 3,21E-05 |
| NEBL     | 1,880728 | 1,12E-08 |
| PLCH1    | 1,878498 | 9,57E-11 |
| OARD1    | 1,878241 | 5,50E-09 |
| STMN1    | 1,877624 | 7,39E-08 |
| RNASEL   | 1,871787 | 2,39E-06 |
| NRAS     | 1,87171  | 1,70E-13 |



|           |          |          |
|-----------|----------|----------|
| THOC6     | 1,871195 | 3,04E-07 |
| ZNF766    | 1,870138 | 5,70E-12 |
| SEMA4C    | 1,868815 | 1,18E-08 |
| PELI3     | 1,865626 | 6,57E-08 |
| MLLT3     | 1,864453 | 0,000186 |
| PAIP2     | 1,863248 | 4,18E-10 |
| RPL13     | 1,861926 | 1,98E-10 |
| C14orf80  | 1,858738 | 2,14E-09 |
| TM7SF2    | 1,857057 | 6,66E-05 |
| ATF6B     | 1,854086 | 2,94E-08 |
| LINC01296 | 1,853758 | 0,000186 |
| SP140L    | 1,85289  | 0,000175 |
| SYNE4     | 1,852068 | 2,03E-10 |
| DRAM1     | 1,848992 | 2,66E-06 |
| PVT1      | 1,842361 | 1,09E-06 |
| ATP2B4    | 1,83648  | 2,63E-05 |
| TMEM183A  | 1,830298 | 1,18E-12 |
| SLC27A5   | 1,829656 | 4,38E-08 |
| ZNF608    | 1,827736 | 1,31E-07 |
| GALNT18   | 1,827388 | 0,000938 |
| BTG1      | 1,825917 | 1,49E-10 |
| RGS10     | 1,823068 | 2,49E-05 |
| TCTN2     | 1,822854 | 3,04E-06 |
| VTI1B     | 1,822588 | 2,20E-09 |
| ADAM11    | 1,822478 | 6,94E-05 |
| ANXA6     | 1,822149 | 0,000186 |
| TRIM36    | 1,819036 | 2,98E-06 |
| HILPDA    | 1,815788 | 3,03E-07 |
| RMND5B    | 1,814768 | 2,18E-13 |
| HEXDC     | 1,814297 | 4,04E-06 |
| ABCA2     | 1,812458 | 5,24E-09 |
| DST       | 1,811883 | 4,25E-09 |
| LSM11     | 1,80746  | 6,22E-06 |
| MRPL41    | 1,805504 | 4,62E-10 |
| CCDC71L   | 1,800447 | 6,06E-05 |
| ZNF425    | 1,799261 | 9,29E-06 |
| IQCK      | 1,795836 | 1,11E-06 |
| DTNB      | 1,793332 | 7,72E-08 |
| FBXO31    | 1,792741 | 2,07E-11 |
| TCF25     | 1,791742 | 1,48E-14 |
| ZSCAN21   | 1,790628 | 2,53E-09 |
| LOC113230 | 1,787731 | 1,47E-06 |
| HMGN1     | 1,784359 | 2,24E-13 |
| LRRC23    | 1,780944 | 0,000504 |
| RPSAP58   | 1,780536 | 1,03E-11 |
| APRT      | 1,776202 | 6,47E-13 |
| FBXW4     | 1,769278 | 3,07E-07 |
| C2orf68   | 1,763822 | 3,14E-09 |
| FRG1BP    | 1,761233 | 0,000121 |
| FAM89B    | 1,760789 | 4,57E-11 |

|           |          |          |
|-----------|----------|----------|
| CYP2J2    | 1,760427 | 0,000116 |
| POLR2J    | 1,759221 | 1,97E-10 |
| SYDE2     | 1,75916  | 0,000136 |
| SF3B4     | 1,757877 | 5,31E-13 |
| SLC44A2   | 1,755179 | 1,57E-09 |
| ZSCAN26   | 1,754245 | 8,04E-05 |
| ZNF444    | 1,754199 | 2,74E-08 |
| ATP11B    | 1,750227 | 0,000196 |
| ZNF611    | 1,74641  | 3,68E-06 |
| ZNF212    | 1,743672 | 1,93E-07 |
| HSD17B8   | 1,74344  | 7,23E-05 |
| VPS50     | 1,736904 | 1,25E-05 |
| COBLL1    | 1,736375 | 3,77E-07 |
| ZNF197    | 1,734832 | 1,30E-06 |
| FAH       | 1,731429 | 3,45E-09 |
| ZNF616    | 1,730874 | 8,65E-09 |
| IQCH-AS1  | 1,729956 | 2,18E-05 |
| HCFC1R1   | 1,729864 | 1,92E-05 |
| TMEM9     | 1,729673 | 5,54E-11 |
| PPDPF     | 1,727185 | 2,26E-06 |
| TARS2     | 1,720409 | 1,15E-09 |
| NSMCE4A   | 1,719778 | 8,82E-07 |
| RRM2B     | 1,718841 | 6,27E-05 |
| AP5S1     | 1,717811 | 1,93E-05 |
| NSMCE2    | 1,716573 | 7,48E-09 |
| TSPAN17   | 1,7159   | 4,60E-09 |
| JHDM1D-A  | 1,715483 | 9,40E-05 |
| ZNF16     | 1,715479 | 0,000361 |
| GAS5      | 1,715253 | 0,000993 |
| LAPTM4B   | 1,712006 | 1,78E-14 |
| SETDB1    | 1,711099 | 5,64E-11 |
| ZKSCAN4   | 1,708236 | 0,000167 |
| NFIB      | 1,708034 | 6,98E-09 |
| AP4E1     | 1,707147 | 1,68E-08 |
| TRIM45    | 1,703681 | 0,000151 |
| ALDH6A1   | 1,700447 | 1,90E-10 |
| TSTD1     | 1,695855 | 4,12E-08 |
| ENO2      | 1,695636 | 0,000325 |
| HIPK1     | 1,695251 | 1,45E-12 |
| SLC2A4RG  | 1,693645 | 1,29E-07 |
| C7orf60   | 1,692841 | 0,000118 |
| TGIF2     | 1,691702 | 1,82E-05 |
| TNRC6C    | 1,69157  | 3,62E-10 |
| ZNF687    | 1,691319 | 8,17E-08 |
| C2orf15   | 1,689401 | 1,89E-06 |
| SSH3      | 1,689077 | 4,93E-06 |
| SIVA1     | 1,687504 | 6,09E-09 |
| FNBP1     | 1,687103 | 3,45E-10 |
| CHD3      | 1,686402 | 8,90E-12 |
| TRIM52-AS | 1,683916 | 0,000203 |

|           |          |          |
|-----------|----------|----------|
| DNAJC4    | 1,680037 | 1,05E-05 |
| PPL       | 1,677764 | 3,61E-05 |
| TAMM41    | 1,677247 | 1,27E-07 |
| KIF13A    | 1,674381 | 3,45E-09 |
| MDM4      | 1,67343  | 2,29E-06 |
| PKN1      | 1,672815 | 2,21E-06 |
| RPS18     | 1,67184  | 1,47E-07 |
| VPS52     | 1,671525 | 7,72E-12 |
| UBE2Q2    | 1,670509 | 1,08E-07 |
| WWP1      | 1,670227 | 1,03E-05 |
| ZNF888    | 1,669097 | 1,59E-05 |
| APPL2     | 1,668611 | 1,85E-06 |
| GCSH      | 1,666286 | 1,74E-10 |
| CCDC92    | 1,665442 | 1,98E-05 |
| SNRPE     | 1,66493  | 1,52E-12 |
| FAM127B   | 1,664172 | 7,91E-12 |
| TRIM33    | 1,663756 | 2,63E-11 |
| ILVBL     | 1,663161 | 5,06E-10 |
| EPHB3     | 1,663109 | 0,000458 |
| TTC26     | 1,659232 | 0,000179 |
| CYTH2     | 1,657679 | 2,08E-11 |
| POLD4     | 1,657366 | 0,000289 |
| CD47      | 1,657148 | 1,12E-08 |
| FKBP10    | 1,656699 | 4,84E-13 |
| ENY2      | 1,652711 | 5,57E-07 |
| NR2F2     | 1,650378 | 7,80E-10 |
| KLF7      | 1,649707 | 1,27E-05 |
| ZNF184    | 1,649363 | 4,04E-08 |
| SUV420H2  | 1,648323 | 4,49E-05 |
| POLR3C    | 1,637918 | 2,86E-05 |
| IFT43     | 1,637577 | 7,14E-07 |
| BNIP3     | 1,636473 | 4,02E-09 |
| KCNC3     | 1,635683 | 1,82E-05 |
| ZNF585A   | 1,635372 | 0,000329 |
| FAM63A    | 1,633655 | 0,000873 |
| LHPP      | 1,63274  | 2,54E-05 |
| SERTAD3   | 1,631672 | 1,95E-05 |
| LPIN3     | 1,630516 | 0,000528 |
| HIST2H2BE | 1,629812 | 0,000696 |
| ZNF385A   | 1,62946  | 1,21E-08 |
| VPS45     | 1,627482 | 8,47E-09 |
| TMEM231   | 1,624393 | 3,89E-06 |
| MAP4K4    | 1,622147 | 8,10E-13 |
| MMAB      | 1,621735 | 5,73E-11 |
| MORN2     | 1,618728 | 0,000836 |
| ICAM3     | 1,618701 | 0,000166 |
| CHCHD5    | 1,618269 | 4,51E-08 |
| ZDHHC24   | 1,618035 | 9,26E-05 |
| ZNF138    | 1,616292 | 4,85E-06 |
| PDE4A     | 1,613151 | 0,000596 |

|          |          |          |
|----------|----------|----------|
| NUDT4    | 1,608888 | 4,21E-08 |
| RPL30    | 1,607811 | 1,66E-07 |
| ZNF252P  | 1,605916 | 6,29E-10 |
| TMPO-AS1 | 1,605726 | 0,000211 |
| ADARB1   | 1,605392 | 0,000146 |
| ZNF35    | 1,605304 | 0,00054  |
| NCK2     | 1,602623 | 2,79E-09 |
| TUFT1    | 1,601587 | 2,49E-07 |
| FBXW8    | 1,601468 | 5,80E-08 |
| ZNF480   | 1,600252 | 2,36E-07 |
| METTL6   | 1,599946 | 1,81E-05 |
| PDE4DIP  | 1,59939  | 2,72E-05 |
| ZNF791   | 1,59824  | 7,35E-05 |
| AUTS2    | 1,5979   | 4,48E-07 |
| IQSEC1   | 1,597762 | 3,57E-09 |
| CDKN2C   | 1,593458 | 7,27E-06 |
| ZNF503   | 1,593412 | 2,23E-09 |
| DGCR6L   | 1,591504 | 9,94E-05 |
| DNAAF3   | 1,591157 | 2,47E-06 |
| PPCDC    | 1,590243 | 2,03E-05 |
| RBM8A    | 1,589993 | 1,55E-11 |
| IMPDH1   | 1,589471 | 2,05E-07 |
| AGGF1    | 1,589414 | 1,28E-08 |
| RINT1    | 1,589318 | 2,41E-06 |
| C11orf49 | 1,588763 | 1,97E-06 |
| NUCKS1   | 1,588139 | 2,46E-12 |
| ERGIC1   | 1,587585 | 4,73E-08 |
| TGIF1    | 1,584061 | 1,81E-06 |
| TMEM223  | 1,583357 | 1,50E-07 |
| ZNF607   | 1,58245  | 3,26E-06 |
| INPPL1   | 1,581604 | 6,67E-11 |
| MREG     | 1,579406 | 1,44E-07 |
| DENND2D  | 1,579321 | 5,95E-08 |
| MZT2B    | 1,579227 | 3,33E-08 |
| ALG13    | 1,578646 | 7,49E-06 |
| NDUFB7   | 1,577205 | 1,41E-11 |
| ZNF268   | 1,576304 | 7,64E-07 |
| ATPAF1   | 1,571215 | 2,21E-08 |
| EAPP     | 1,57074  | 5,28E-07 |
| TLE3     | 1,569167 | 4,11E-09 |
| SUPT4H1  | 1,569126 | 2,68E-10 |
| PACS2    | 1,567865 | 1,53E-08 |
| H1FX     | 1,567129 | 9,78E-06 |
| SMDT1    | 1,563098 | 2,58E-05 |
| RALGPS2  | 1,555213 | 5,91E-07 |
| EIF2D    | 1,554245 | 7,42E-09 |
| ZNF140   | 1,553575 | 3,98E-06 |
| DECR1    | 1,553376 | 4,71E-09 |
| IER5     | 1,550956 | 1,35E-06 |
| TATDN1   | 1,550668 | 3,67E-09 |

|           |          |          |
|-----------|----------|----------|
| PATZ1     | 1,549405 | 1,59E-06 |
| FLOT2     | 1,549217 | 1,11E-05 |
| GRHL2     | 1,547815 | 9,10E-07 |
| DDT       | 1,54601  | 1,95E-06 |
| KIF20A    | 1,545637 | 1,17E-08 |
| ZNF84     | 1,544425 | 1,54E-07 |
| MDM2      | 1,544323 | 9,78E-05 |
| TMOD3     | 1,543956 | 3,26E-12 |
| EGFL7     | 1,542492 | 9,91E-05 |
| HOOK2     | 1,542218 | 7,24E-10 |
| QKI       | 1,540506 | 1,77E-05 |
| MTA3      | 1,531114 | 1,23E-08 |
| FAM172A   | 1,529776 | 0,000146 |
| CIRBP     | 1,529711 | 2,26E-05 |
| ITGB5     | 1,526796 | 0,000215 |
| SOGA1     | 1,524433 | 2,21E-05 |
| NXT2      | 1,52022  | 0,000282 |
| ZFP1      | 1,518543 | 1,47E-06 |
| RMI2      | 1,516928 | 6,58E-06 |
| AGAP2-AS1 | 1,516677 | 0,000238 |
| MKS1      | 1,514153 | 6,76E-06 |
| LTBP3     | 1,513772 | 3,24E-06 |
| PIGT      | 1,513063 | 7,68E-08 |
| RPS27     | 1,511235 | 8,32E-06 |
| SEMA3F    | 1,509582 | 0,000147 |
| RPL10     | 1,508294 | 5,08E-07 |
| RB1       | 1,506447 | 9,18E-06 |
| CCDC101   | 1,503267 | 1,73E-05 |
| PSMG3-AS1 | 1,502988 | 0,000726 |
| ZNF688    | 1,501035 | 0,000247 |
| ATMIN     | 1,499076 | 5,47E-10 |
| PIGB      | 1,496509 | 7,74E-06 |
| MBD5      | 1,495115 | 0,000485 |
| CHD1L     | 1,493187 | 1,07E-06 |
| IDS       | 1,492168 | 0,000111 |
| STRADA    | 1,491904 | 8,84E-06 |
| FAM53B    | 1,490848 | 2,51E-08 |
| ATXN7L1   | 1,49042  | 2,15E-05 |
| RPS3      | 1,488144 | 2,46E-08 |
| GOLPH3L   | 1,486702 | 0,000103 |
| SLC50A1   | 1,484887 | 5,96E-07 |
| EXPH5     | 1,484548 | 4,94E-05 |
| DSTYK     | 1,484371 | 1,19E-07 |
| TRPM7     | 1,483521 | 7,52E-07 |
| MNAT1     | 1,482497 | 8,38E-06 |
| PTPRU     | 1,481423 | 4,98E-06 |
| C17orf62  | 1,480933 | 1,02E-08 |
| RPL8      | 1,477112 | 2,81E-11 |
| COMMD7    | 1,475739 | 7,43E-05 |
| DCXR      | 1,475402 | 1,68E-06 |

|           |          |          |
|-----------|----------|----------|
| IFT172    | 1,475007 | 0,000362 |
| TMEM205   | 1,473983 | 6,55E-06 |
| RNF5      | 1,473318 | 1,47E-05 |
| NMT2      | 1,470933 | 0,000275 |
| DYNLL2    | 1,469821 | 8,77E-10 |
| FAM210B   | 1,469108 | 9,05E-05 |
| PQLC3     | 1,46882  | 0,000415 |
| RABIF     | 1,467708 | 3,02E-07 |
| APH1A     | 1,465736 | 1,62E-10 |
| CCDC149   | 1,465607 | 0,000752 |
| SPECC1    | 1,465127 | 5,05E-06 |
| PRDM4     | 1,464477 | 6,05E-11 |
| RBM4      | 1,463687 | 6,52E-08 |
| PCNX      | 1,46018  | 6,49E-09 |
| SEZ6L2    | 1,458527 | 0,000143 |
| SERPINH1  | 1,457958 | 1,31E-09 |
| PRUNE     | 1,457716 | 2,19E-07 |
| TLCD1     | 1,457356 | 7,72E-05 |
| KIAA1549  | 1,457118 | 2,09E-05 |
| TMEM254   | 1,454475 | 3,25E-06 |
| GCDH      | 1,454327 | 6,10E-08 |
| MTCH2     | 1,453655 | 2,74E-06 |
| CACFD1    | 1,450899 | 0,000292 |
| RUNX2     | 1,450193 | 2,01E-06 |
| LEF1      | 1,449869 | 6,29E-06 |
| PRR3      | 1,446715 | 0,00021  |
| TCEAL4    | 1,444742 | 3,20E-08 |
| RNF139    | 1,442579 | 2,87E-08 |
| RPL18A    | 1,441439 | 7,53E-07 |
| MCM7      | 1,437198 | 1,35E-08 |
| LEO1      | 1,436833 | 3,05E-10 |
| NOL3      | 1,434785 | 2,48E-06 |
| RING1     | 1,43447  | 2,41E-07 |
| DANCR     | 1,434155 | 3,86E-06 |
| LRRC37BP1 | 1,433776 | 0,000824 |
| PLCB1     | 1,433723 | 0,000222 |
| OXCT1     | 1,4328   | 6,77E-05 |
| C9orf3    | 1,432595 | 7,03E-05 |
| RAD23A    | 1,432022 | 5,98E-08 |
| GALNT12   | 1,430254 | 0,000496 |
| RPL35A    | 1,43021  | 5,49E-07 |
| TIGD6     | 1,426887 | 0,000642 |
| SAMD1     | 1,425865 | 1,34E-05 |
| C9orf152  | 1,425171 | 0,000827 |
| TSPAN13   | 1,423793 | 7,33E-06 |
| TEF       | 1,423332 | 0,000686 |
| PAIP2B    | 1,422978 | 0,000214 |
| ARL8A     | 1,422619 | 2,50E-08 |
| GABARAPL  | 1,419485 | 0,000547 |
| PPM1A     | 1,418827 | 4,20E-05 |

|          |          |          |
|----------|----------|----------|
| NAT8L    | 1,416697 | 0,000472 |
| ZNF286A  | 1,415199 | 3,80E-07 |
| NDUFB9   | 1,411086 | 2,03E-07 |
| C19orf43 | 1,410989 | 8,86E-09 |
| SMARCD2  | 1,410104 | 3,07E-10 |
| FAM3A    | 1,409069 | 0,000105 |
| RAB24    | 1,407237 | 0,000117 |
| CINP     | 1,407209 | 0,000458 |
| BMPR2    | 1,404865 | 3,68E-06 |
| NRP1     | 1,404057 | 0,000948 |
| ACSF3    | 1,402345 | 9,00E-08 |
| UQCRC2   | 1,399481 | 2,10E-07 |
| TPD52    | 1,398235 | 2,83E-08 |
| TMEM14C  | 1,397306 | 5,96E-07 |
| ATP5A1   | 1,396185 | 5,68E-11 |
| MACROD1  | 1,396011 | 5,76E-06 |
| ARHGEF19 | 1,395058 | 0,00014  |
| ECSIT    | 1,394509 | 1,83E-05 |
| SNX2     | 1,39414  | 7,39E-06 |
| NCOA2    | 1,393739 | 0,000122 |
| LPAR2    | 1,392595 | 8,68E-07 |
| MTSS1L   | 1,39102  | 2,50E-05 |
| PHLPP1   | 1,388919 | 1,32E-07 |
| SPTBN2   | 1,386815 | 0,000129 |
| CTDSP2   | 1,386125 | 9,36E-06 |
| ZNF510   | 1,385913 | 0,000105 |
| ZNF778   | 1,384027 | 1,68E-05 |
| OLFM1    | 1,382628 | 3,00E-05 |
| ZNF12    | 1,381722 | 7,74E-07 |
| ZNF675   | 1,381188 | 8,30E-05 |
| ZNF45    | 1,380098 | 0,000516 |
| ATXN7L3B | 1,377835 | 3,53E-10 |
| PACS1    | 1,37749  | 7,32E-05 |
| ARNT     | 1,377149 | 2,15E-08 |
| DSTN     | 1,376171 | 1,49E-05 |
| ZKSCAN1  | 1,373294 | 7,82E-09 |
| CCDC57   | 1,372851 | 0,000352 |
| DCP1B    | 1,372766 | 0,000469 |
| COX4I1   | 1,370566 | 1,37E-10 |
| ATP6V0E2 | 1,367477 | 0,000478 |
| SRPK2    | 1,367321 | 2,97E-08 |
| MRPL11   | 1,36504  | 3,18E-08 |
| MAPK6    | 1,36498  | 4,86E-09 |
| RPS19    | 1,363615 | 1,99E-07 |
| BCL9     | 1,362792 | 4,26E-06 |
| NDUFA3   | 1,361349 | 3,92E-06 |
| KDELC2   | 1,36126  | 8,96E-05 |
| RALGPS1  | 1,360926 | 0,000228 |
| RXRA     | 1,359932 | 5,06E-05 |
| ZFYVE21  | 1,359374 | 1,21E-05 |

|          |          |          |
|----------|----------|----------|
| TPD52L1  | 1,358863 | 0,000146 |
| SLC9A3R1 | 1,358633 | 2,22E-05 |
| RPL32    | 1,357517 | 1,51E-07 |
| CRTC1    | 1,35702  | 0,000464 |
| RBM4B    | 1,356539 | 0,00038  |
| TIMM9    | 1,356282 | 0,000223 |
| TSEN15   | 1,35496  | 0,000417 |
| TSPAN6   | 1,353887 | 1,96E-05 |
| KIAA0101 | 1,352818 | 1,92E-06 |
| NUDT3    | 1,35253  | 0,000404 |
| PMS2P1   | 1,351186 | 0,000119 |
| FUNDC2   | 1,349091 | 5,46E-07 |
| EPB41L1  | 1,348514 | 4,77E-06 |
| TMC4     | 1,348307 | 0,000181 |
| TAOK3    | 1,348302 | 8,11E-07 |
| GNB5     | 1,345252 | 7,33E-05 |
| S100A10  | 1,343723 | 3,05E-07 |
| ZNF282   | 1,34348  | 1,51E-06 |
| POLR2K   | 1,341302 | 0,000253 |
| NDUFS8   | 1,339111 | 2,04E-06 |
| PRCP     | 1,337171 | 1,65E-05 |
| MB21D2   | 1,336735 | 0,00055  |
| COA5     | 1,336125 | 3,03E-05 |
| BANF1    | 1,336029 | 4,16E-07 |
| FAM86C1  | 1,334131 | 7,42E-05 |
| ZNF765   | 1,332645 | 0,000663 |
| GLB1     | 1,331738 | 1,09E-05 |
| IFT57    | 1,331002 | 4,10E-05 |
| MED13L   | 1,330162 | 2,58E-06 |
| ROGDI    | 1,329984 | 0,000463 |
| DGKZ     | 1,328694 | 1,35E-05 |
| BOD1     | 1,326473 | 3,06E-05 |
| CFAP36   | 1,326465 | 2,06E-05 |
| RPS14    | 1,325966 | 1,37E-07 |
| CAMSAP1  | 1,325871 | 1,52E-08 |
| NADSYN1  | 1,325354 | 2,50E-05 |
| HARS2    | 1,324254 | 2,14E-07 |
| NIPSNAP1 | 1,323328 | 9,13E-07 |
| CARHSP1  | 1,323116 | 0,000127 |
| JTB      | 1,320032 | 1,17E-06 |
| JUND     | 1,317769 | 0,000806 |
| ZNF3     | 1,317759 | 2,42E-06 |
| ZMAT2    | 1,317303 | 1,11E-06 |
| PDCL3    | 1,317159 | 3,83E-06 |
| CUL7     | 1,316893 | 2,26E-05 |
| UBTD2    | 1,31652  | 8,47E-07 |
| SEC11A   | 1,315265 | 4,25E-09 |
| COX5B    | 1,314794 | 9,05E-09 |
| RPL12    | 1,313706 | 1,61E-06 |
| COQ2     | 1,313262 | 1,24E-05 |



|          |          |          |
|----------|----------|----------|
| PPP1R13B | 1,312476 | 2,87E-05 |
| MYL12B   | 1,309321 | 4,30E-09 |
| AP4B1    | 1,308023 | 7,87E-05 |
| ATP5I    | 1,306405 | 4,18E-06 |
| CETN2    | 1,305042 | 1,87E-06 |
| RECQL5   | 1,304665 | 0,000461 |
| SNAPIN   | 1,302362 | 6,91E-05 |
| ZNF100   | 1,301981 | 0,000319 |
| RNF181   | 1,301779 | 9,64E-06 |
| ZSWIM7   | 1,300495 | 0,000248 |
| RNASEH2A | 1,300062 | 4,88E-06 |
| TRAK2    | 1,299338 | 1,13E-06 |
| GLTSCR2  | 1,299203 | 2,90E-05 |
| EHMT2    | 1,297797 | 1,52E-06 |
| AHR      | 1,297529 | 5,66E-08 |
| SSNA1    | 1,296208 | 9,31E-05 |
| TAF11    | 1,295703 | 2,74E-06 |
| HMBS     | 1,295412 | 2,22E-05 |
| NUDT14   | 1,290271 | 2,59E-05 |
| SOS1     | 1,289928 | 3,08E-07 |
| TAF3     | 1,2885   | 2,05E-05 |
| KAT5     | 1,28827  | 3,58E-06 |
| EEF1A2   | 1,287066 | 0,00039  |
| ASB8     | 1,28632  | 0,000944 |
| COMTD1   | 1,286297 | 0,000131 |
| GRB14    | 1,285789 | 0,000221 |
| OAZ2     | 1,285703 | 1,66E-05 |
| SUMO3    | 1,284756 | 3,48E-08 |
| TMEM65   | 1,283998 | 0,000459 |
| CCDC34   | 1,28287  | 0,000163 |
| GPR89A   | 1,282523 | 0,00042  |
| ZNF777   | 1,280927 | 0,001014 |
| ZNF845   | 1,277636 | 0,000372 |
| JARID2   | 1,275837 | 3,40E-07 |
| FLJ10038 | 1,275307 | 0,000224 |
| SQLE     | 1,274916 | 5,53E-06 |
| ARL6IP4  | 1,274406 | 1,95E-07 |
| ASCC2    | 1,273193 | 3,21E-06 |
| KLHDC3   | 1,272871 | 9,48E-05 |
| SIRT5    | 1,270147 | 5,68E-05 |
| MRPS28   | 1,266984 | 0,000189 |
| SAYS1    | 1,264972 | 1,14E-05 |
| AKT1     | 1,264573 | 2,50E-05 |
| SMIM7    | 1,264023 | 1,66E-06 |
| RPS25    | 1,263699 | 6,75E-06 |
| CTPS2    | 1,262593 | 3,27E-06 |
| TK1      | 1,260526 | 0,000101 |
| COX6A1   | 1,259894 | 1,46E-08 |
| EIF2AK3  | 1,257893 | 0,000531 |
| NDUFA2   | 1,257548 | 1,49E-05 |

|          |          |          |
|----------|----------|----------|
| SLC9A3R2 | 1,257462 | 9,95E-05 |
| KLHDC4   | 1,256603 | 1,86E-06 |
| NSA2     | 1,249954 | 3,26E-07 |
| USP8     | 1,249603 | 4,32E-08 |
| PPIC     | 1,245906 | 1,88E-05 |
| EPHB4    | 1,24351  | 3,15E-07 |
| IMPACT   | 1,239786 | 4,20E-05 |
| EBAG9    | 1,235105 | 9,31E-05 |
| VKORC1   | 1,232874 | 0,000196 |
| PAAF1    | 1,232799 | 2,15E-05 |
| FAM110A  | 1,232218 | 0,00026  |
| ABHD16A  | 1,229957 | 7,61E-06 |
| SUV420H1 | 1,22993  | 1,40E-06 |
| RPS29    | 1,226514 | 7,67E-05 |
| RPL21P28 | 1,225594 | 0,000273 |
| UQCC3    | 1,225289 | 2,21E-05 |
| C10orf76 | 1,223965 | 0,000319 |
| TRAF4    | 1,223268 | 3,14E-06 |
| TTC9     | 1,22325  | 0,000194 |
| C14orf2  | 1,222446 | 1,99E-05 |
| TOP2B    | 1,221189 | 9,61E-08 |
| ZNF579   | 1,220045 | 1,92E-05 |
| UQCC2    | 1,218958 | 0,000201 |
| TACO1    | 1,217451 | 9,36E-05 |
| ALKBH7   | 1,217427 | 2,49E-05 |
| MED21    | 1,216717 | 7,44E-05 |
| THG1L    | 1,216631 | 1,75E-05 |
| MTIF3    | 1,216222 | 9,89E-05 |
| ALKBH4   | 1,214689 | 0,000168 |
| ANKRD50  | 1,214297 | 9,54E-07 |
| RPL28    | 1,21287  | 4,31E-06 |
| MYO5C    | 1,212673 | 0,000219 |
| ZNF768   | 1,212357 | 3,77E-06 |
| FAM83H-A | 1,210512 | 8,57E-06 |
| DLG1     | 1,209466 | 2,13E-06 |
| ZNF107   | 1,207865 | 0,000705 |
| SLC25A39 | 1,20728  | 2,27E-07 |
| TMEM168  | 1,207083 | 0,000127 |
| DBNDD1   | 1,205695 | 0,000604 |
| COX14    | 1,20568  | 0,000257 |
| FAF2     | 1,205563 | 9,45E-07 |
| PRMT2    | 1,205526 | 0,0003   |
| VPS28    | 1,205052 | 9,50E-06 |
| RAE1     | 1,204445 | 5,14E-06 |
| PPP1R35  | 1,201896 | 0,000516 |
| CBX1     | 1,201702 | 2,77E-06 |
| PRKD3    | 1,201199 | 0,000875 |
| ARL2     | 1,20106  | 0,000277 |
| PRPSAP1  | 1,197767 | 2,46E-05 |
| CBS      | 1,197307 | 0,000191 |

|          |          |          |
|----------|----------|----------|
| INTS2    | 1,19634  | 0,000128 |
| GNB2L1   | 1,195884 | 6,74E-06 |
| ARF3     | 1,194338 | 8,43E-06 |
| HLTF     | 1,19368  | 3,65E-05 |
| SCAMP1   | 1,191661 | 7,84E-05 |
| SSBP3    | 1,191594 | 0,00036  |
| RPRD2    | 1,19123  | 8,28E-06 |
| EFNA4    | 1,191214 | 7,48E-05 |
| FZD6     | 1,189761 | 0,000241 |
| RPS15A   | 1,188854 | 9,07E-06 |
| CUTA     | 1,188696 | 2,37E-06 |
| YIPF3    | 1,18531  | 1,78E-06 |
| HR       | 1,185286 | 0,000351 |
| DTWD2    | 1,184316 | 0,000734 |
| C7orf73  | 1,183978 | 7,26E-06 |
| TMEM263  | 1,183779 | 0,000926 |
| C16orf58 | 1,182054 | 3,20E-06 |
| TMEM63B  | 1,180684 | 0,00061  |
| CRBN     | 1,179926 | 0,000874 |
| ATP5L    | 1,179059 | 1,41E-06 |
| RPLP1    | 1,178268 | 0,000392 |
| MEPCE    | 1,176403 | 0,00016  |
| SIKE1    | 1,171814 | 0,000335 |
| PSMD4    | 1,170339 | 7,31E-07 |
| IGF1R    | 1,169959 | 1,61E-05 |
| OTUD7B   | 1,169801 | 0,000242 |
| LMAN2    | 1,169538 | 2,70E-05 |
| SARS2    | 1,16692  | 0,000128 |
| RPS17    | 1,165063 | 7,24E-05 |
| NT5DC2   | 1,16347  | 3,40E-05 |
| GALK1    | 1,1633   | 0,000417 |
| PSMB4    | 1,163063 | 3,57E-06 |
| MAP2K5   | 1,163008 | 0,0001   |
| GZF1     | 1,162069 | 0,000385 |
| TMEM258  | 1,162015 | 0,000111 |
| KARS     | 1,161552 | 1,08E-05 |
| TMBIM4   | 1,16103  | 0,000148 |
| MRPS18B  | 1,160657 | 8,07E-06 |
| SLC29A2  | 1,160302 | 0,000631 |
| MTX1     | 1,158474 | 0,000221 |
| CTCF     | 1,157234 | 6,87E-05 |
| GDE1     | 1,155616 | 0,000138 |
| SLC25A24 | 1,154875 | 7,03E-05 |
| MIF      | 1,151847 | 1,34E-06 |
| SNX18    | 1,151753 | 0,000929 |
| C19orf60 | 1,151344 | 0,000224 |
| RSBN1    | 1,15014  | 0,000466 |
| PIK3C2B  | 1,150078 | 0,000845 |
| MRPL27   | 1,146683 | 3,58E-05 |
| TRMT12   | 1,146182 | 0,000196 |

|          |          |          |
|----------|----------|----------|
| BCKDHA   | 1,145522 | 0,000336 |
| PRPF3    | 1,14493  | 0,000646 |
| RPL4     | 1,144273 | 3,60E-06 |
| DBI      | 1,144017 | 0,00013  |
| RGL2     | 1,143174 | 5,72E-05 |
| TRPM4    | 1,142546 | 0,000847 |
| DNMT3A   | 1,142199 | 1,22E-05 |
| PTTG1IP  | 1,141425 | 5,04E-07 |
| SSR2     | 1,1411   | 6,02E-05 |
| RPL37A   | 1,13728  | 0,000132 |
| NSD1     | 1,136545 | 4,87E-05 |
| IDH3G    | 1,136499 | 4,71E-06 |
| CNOT2    | 1,136386 | 7,77E-06 |
| AP5M1    | 1,135589 | 0,000235 |
| B4GALT7  | 1,133072 | 0,000298 |
| XPOT     | 1,129973 | 9,03E-05 |
| WRB      | 1,128811 | 0,000755 |
| NDUFA13  | 1,125375 | 1,69E-05 |
| SERPINB6 | 1,123678 | 3,04E-06 |
| ATAD2    | 1,123307 | 0,000572 |
| ARPP19   | 1,121754 | 9,59E-07 |
| ECI1     | 1,121547 | 3,67E-05 |
| NUDT16L1 | 1,121143 | 0,000291 |
| AP4M1    | 1,118412 | 0,000282 |
| BDH1     | 1,118175 | 4,81E-05 |
| MYO6     | 1,117935 | 7,49E-06 |
| TMEM14B  | 1,116317 | 0,0004   |
| CMC2     | 1,115425 | 0,000145 |
| PIGU     | 1,114556 | 0,000105 |
| SIPA1L1  | 1,114199 | 7,02E-06 |
| RHNO1    | 1,114125 | 0,000995 |
| DLGAP5   | 1,112358 | 1,98E-05 |
| VIPAS39  | 1,112201 | 0,000204 |
| CREB1    | 1,110187 | 3,88E-05 |
| PPP2R1A  | 1,11017  | 0,00037  |
| CDK2AP1  | 1,106424 | 0,000425 |
| ZNF205   | 1,105976 | 0,000432 |
| RPL31    | 1,105414 | 1,88E-05 |
| TBC1D5   | 1,105028 | 3,24E-05 |
| SCD      | 1,104844 | 0,000559 |
| RPLP0    | 1,101273 | 1,29E-05 |
| MRPL24   | 1,099867 | 0,000158 |
| RTFDC1   | 1,099354 | 0,000199 |
| MTMR4    | 1,099344 | 8,75E-06 |
| REEP5    | 1,098903 | 0,000919 |
| LAMA5    | 1,097799 | 3,05E-05 |
| ZMYND11  | 1,094308 | 9,35E-06 |
| MRPL9    | 1,093738 | 0,000189 |
| MYL12A   | 1,092993 | 1,01E-05 |
| SUCLG2   | 1,092139 | 0,000399 |

|         |          |          |
|---------|----------|----------|
| DMXL2   | 1,089154 | 2,13E-05 |
| GLRX5   | 1,089153 | 6,33E-05 |
| CCNI    | 1,088774 | 8,28E-05 |
| RMDN1   | 1,08592  | 0,000111 |
| C9orf64 | 1,085803 | 0,000607 |
| ATP13A1 | 1,085537 | 1,94E-05 |
| SEC22B  | 1,085164 | 0,000172 |
| TM7SF3  | 1,084991 | 0,000416 |
| SART1   | 1,084442 | 7,31E-05 |
| DDX41   | 1,083899 | 5,48E-06 |
| RPS23   | 1,083577 | 0,000138 |
| BCL7C   | 1,082235 | 9,33E-05 |
| ATP5D   | 1,080279 | 0,000243 |
| ZKSCAN8 | 1,078585 | 0,000211 |
| STUB1   | 1,076117 | 2,26E-05 |
| TRMT112 | 1,075663 | 0,00012  |
| PFKL    | 1,074194 | 0,000277 |
| ZNF561  | 1,074005 | 0,000336 |
| ZFP62   | 1,07313  | 2,31E-05 |
| RPRD1A  | 1,072582 | 1,22E-05 |
| YIPF5   | 1,071163 | 0,000191 |
| PYCRL   | 1,070946 | 0,000925 |
| ATP5H   | 1,070372 | 6,09E-05 |
| CUX1    | 1,069014 | 4,18E-05 |
| NCS1    | 1,06864  | 6,53E-05 |
| RPL26L1 | 1,067776 | 8,67E-05 |
| CSRNP2  | 1,067608 | 6,11E-05 |
| STK38   | 1,066805 | 0,000129 |
| ECD     | 1,066735 | 0,000156 |
| ISCU    | 1,064714 | 0,000438 |
| NBN     | 1,061605 | 3,57E-06 |
| RPL13A  | 1,061085 | 0,000145 |
| SHFM1   | 1,054002 | 8,33E-06 |
| CNOT8   | 1,053832 | 0,00017  |
| AP2S1   | 1,05373  | 4,45E-05 |
| TAF6    | 1,053485 | 0,000151 |
| VMP1    | 1,052211 | 0,000125 |
| DYM     | 1,051617 | 8,89E-05 |
| DARS2   | 1,050279 | 2,27E-05 |
| ERBB3   | 1,049769 | 8,91E-06 |
| HNRNPH3 | 1,049654 | 0,000918 |
| TKFC    | 1,049239 | 8,61E-05 |
| COX7C   | 1,049056 | 0,000138 |
| MRPS34  | 1,048854 | 6,90E-05 |
| STX6    | 1,048551 | 0,000155 |
| KLHL36  | 1,047918 | 0,00013  |
| SCAF11  | 1,046306 | 4,30E-05 |
| TRIAP1  | 1,045857 | 0,000758 |
| RPL37   | 1,043718 | 0,000281 |
| TRIP6   | 1,043471 | 3,36E-05 |

|          |          |          |
|----------|----------|----------|
| EPB41L5  | 1,042732 | 8,90E-05 |
| MYL6     | 1,039907 | 2,12E-06 |
| GPX4     | 1,038686 | 0,000189 |
| FIS1     | 1,038179 | 9,57E-05 |
| MAZ      | 1,037029 | 0,000278 |
| SYT7     | 1,035101 | 0,000305 |
| ATRAID   | 1,033007 | 0,000241 |
| LNK2     | 1,032511 | 7,45E-05 |
| CELSR1   | 1,032494 | 0,000241 |
| PRKAG1   | 1,029978 | 0,000167 |
| ERGIC3   | 1,02802  | 5,54E-05 |
| DAZAP2   | 1,026149 | 0,000614 |
| PPP1R37  | 1,024715 | 0,00016  |
| MTMR3    | 1,021826 | 0,000104 |
| PSMD7    | 1,021624 | 1,89E-05 |
| MAPKAPK2 | 1,020537 | 0,000197 |
| CLCC1    | 1,020488 | 0,000427 |
| PPIG     | 1,017798 | 0,000546 |
| TMEM5    | 1,017566 | 0,000203 |
| LLPH     | 1,017492 | 0,000102 |
| C5orf30  | 1,016942 | 0,000284 |
| ANKIB1   | 1,016853 | 4,68E-05 |
| DDX6     | 1,014834 | 2,10E-05 |
| JAGN1    | 1,013604 | 0,000306 |
| USP6NL   | 1,013537 | 0,000261 |
| ADAR     | 1,013266 | 8,53E-05 |
| LDB1     | 1,01296  | 4,37E-05 |
| CBLL1    | 1,011326 | 0,000287 |
| BCAP29   | 1,011129 | 0,000784 |
| ARF5     | 1,008666 | 5,94E-05 |
| CCDC124  | 1,00752  | 0,000516 |
| BCAP31   | 1,006858 | 0,000996 |
| NDUFA1   | 1,006299 | 0,000758 |
| TOP1     | 1,00556  | 7,11E-06 |
| PI4KB    | 1,005225 | 0,000218 |
| TMEM251  | 1,002075 | 0,0009   |
| BRK1     | 1,000331 | 5,65E-05 |
| TET2     | 1,00032  | 0,000861 |
| SIRT1    | 0,999291 | 0,000925 |
| ARID5B   | 0,999214 | 0,000666 |
| RANBP9   | 0,998716 | 0,000198 |
| ZNF395   | 0,997365 | 0,000809 |
| CCDC90B  | 0,997024 | 0,000551 |
| ANAPC16  | 0,995985 | 7,00E-05 |
| NDUFA12  | 0,992438 | 0,000994 |
| ARMC10   | 0,992373 | 0,000212 |
| CCND1    | 0,992067 | 0,000928 |
| NCBP2    | 0,991072 | 0,00012  |
| SCYL2    | 0,990839 | 8,16E-05 |
| CASP2    | 0,98981  | 0,00012  |

|           |          |          |
|-----------|----------|----------|
| SNX27     | 0,989243 | 7,73E-05 |
| WDR73     | 0,988617 | 0,000491 |
| PWP1      | 0,988436 | 2,71E-05 |
| VPS9D1-AS | 0,988257 | 0,000855 |
| XXYL1     | 0,987506 | 0,000528 |
| MCL1      | 0,987363 | 1,47E-05 |
| CCSER2    | 0,986459 | 0,000393 |
| NELFCD    | 0,985325 | 0,000261 |
| CFL1      | 0,984245 | 0,000168 |
| HNRNPA0   | 0,983309 | 0,000158 |
| ADAT1     | 0,9828   | 0,000194 |
| PRKACA    | 0,978225 | 0,000639 |
| MPHOSPH   | 0,977433 | 0,000414 |
| RNF114    | 0,976174 | 7,63E-05 |
| LAMB2     | 0,973888 | 0,000992 |
| PCCB      | 0,973307 | 4,53E-05 |
| ESRP2     | 0,972157 | 0,000324 |
| PRR11     | 0,972111 | 0,000123 |
| SOX12     | 0,9705   | 0,001005 |
| SLC35C2   | 0,967043 | 0,000735 |
| DNASE2    | 0,965876 | 0,000177 |
| ADI1      | 0,96521  | 0,00026  |
| RBM38     | 0,960775 | 0,0005   |
| HSP90AA1  | 0,960542 | 0,000946 |
| F12       | 0,959039 | 0,000432 |
| RPL41     | 0,958777 | 0,000164 |
| AURKA     | 0,95771  | 0,000345 |
| COX6B1    | 0,956655 | 0,000323 |
| TBC1D30   | 0,956442 | 0,000275 |
| ARFGAP2   | 0,956334 | 0,000372 |
| THNSL1    | 0,954383 | 0,000738 |
| C19orf53  | 0,951059 | 0,000151 |
| RPL35     | 0,948409 | 6,63E-05 |
| STX17     | 0,947849 | 0,000947 |
| SNRPC     | 0,947623 | 3,34E-05 |
| PTOV1     | 0,94344  | 0,000368 |
| CIAO1     | 0,940882 | 0,000721 |
| CNOT6     | 0,940309 | 0,000362 |
| PAQR4     | 0,937091 | 0,000117 |
| PSMC3     | 0,935808 | 0,000629 |
| RPL18     | 0,932102 | 0,000226 |
| ZMYM2     | 0,931651 | 0,000259 |
| PPP1R14B  | 0,931454 | 0,000786 |
| ZNF33A    | 0,9156   | 0,000719 |
| CRTAP     | 0,915109 | 5,62E-05 |
| EIF4B     | 0,914825 | 0,000147 |
| AAAS      | 0,910153 | 0,000483 |
| SEL1L     | 0,909299 | 0,000111 |
| RPS11     | 0,90844  | 0,000901 |
| NDUFB2    | 0,90659  | 0,000822 |

|           |          |          |
|-----------|----------|----------|
| SNRPF     | 0,902676 | 0,000266 |
| CENPN     | 0,901107 | 0,000391 |
| PPP4C     | 0,898712 | 0,000353 |
| CDC42SE1  | 0,89486  | 0,000876 |
| EEF1D     | 0,892502 | 0,000243 |
| C14orf166 | 0,887791 | 0,000117 |
| COPE      | 0,88728  | 0,000368 |
| BPTF      | 0,886972 | 0,000125 |
| NAP1L1    | 0,883449 | 0,000412 |
| FAHD1     | 0,883323 | 0,00074  |
| RFWD2     | 0,881221 | 0,000576 |
| ZMYND8    | 0,878116 | 0,000709 |
| PABPC1    | 0,877179 | 0,000197 |
| OST4      | 0,876047 | 0,000902 |
| PEBP1     | 0,875026 | 0,000168 |
| TET3      | 0,865746 | 0,000766 |
| IMP4      | 0,862398 | 0,000376 |
| CPNE3     | 0,860237 | 0,000736 |
| ATP5C1    | 0,860121 | 0,000459 |
| PTPN18    | 0,859713 | 0,000923 |
| RPL15     | 0,858116 | 0,000341 |
| RPL7A     | 0,849546 | 0,000105 |
| URI1      | 0,848833 | 0,000607 |
| CTNNA1    | 0,843021 | 0,000334 |
| RPS13     | 0,842025 | 0,000324 |
| NGRN      | 0,834346 | 0,000861 |
| RPSA      | 0,826937 | 0,000443 |
| H3F3B     | 0,816439 | 0,000351 |
| ILF2      | 0,80409  | 0,000385 |
| SEC63     | -0,79323 | 0,000796 |
| PRPF40A   | -0,79846 | 0,000493 |
| NSUN2     | -0,7985  | 0,000794 |
| PARP1     | -0,81044 | 0,000554 |
| COLGALT1  | -0,81258 | 0,000746 |
| ANXA2     | -0,81683 | 0,000241 |
| CNPY2     | -0,84093 | 0,000665 |
| LTBR      | -0,84164 | 0,000438 |
| NCL       | -0,84846 | 0,000348 |
| TNPO1     | -0,86057 | 0,00034  |
| RPA2      | -0,86293 | 0,000866 |
| TCP1      | -0,86484 | 0,00016  |
| EIF4E     | -0,8657  | 0,000353 |
| CDC123    | -0,86692 | 0,000463 |
| SKIV2L2   | -0,86804 | 0,000271 |
| NASP      | -0,86962 | 0,000703 |
| RER1      | -0,87483 | 0,000484 |
| MPHOSPH8  | -0,87668 | 0,000271 |
| PUM1      | -0,87737 | 0,00045  |
| MED1      | -0,87979 | 0,000219 |
| ABR       | -0,87986 | 0,000694 |



|          |          |          |
|----------|----------|----------|
| CHMP7    | -0,8815  | 0,000724 |
| EPS8     | -0,88236 | 0,00072  |
| ELF1     | -0,88255 | 0,000541 |
| LAMP1    | -0,89247 | 0,000764 |
| USP16    | -0,8931  | 0,000993 |
| NAA15    | -0,8936  | 0,000127 |
| MGAT2    | -0,90074 | 0,000696 |
| RRM2     | -0,90085 | 0,000137 |
| RANBP2   | -0,90088 | 0,0003   |
| MSL1     | -0,90197 | 0,000577 |
| TLK1     | -0,90503 | 0,00026  |
| TMEM123  | -0,90582 | 0,000121 |
| UBN1     | -0,90663 | 0,000466 |
| IDH3A    | -0,90829 | 0,000139 |
| MIB1     | -0,90865 | 0,00016  |
| ST13     | -0,90884 | 0,00016  |
| WDR12    | -0,90984 | 0,000371 |
| TMEM33   | -0,91043 | 0,000414 |
| ARFGEF2  | -0,91382 | 0,000148 |
| ATXN10   | -0,9139  | 0,000162 |
| WNK1     | -0,91458 | 0,000561 |
| PPP1R8   | -0,91624 | 0,000392 |
| GAPVD1   | -0,91755 | 0,000182 |
| MOB1A    | -0,91756 | 0,001005 |
| HBS1L    | -0,91816 | 0,000293 |
| CTPS1    | -0,91862 | 0,000328 |
| PSMA1    | -0,9195  | 0,000455 |
| PHRF1    | -0,91962 | 0,000287 |
| MAP3K2   | -0,92422 | 0,00041  |
| NCLN     | -0,92468 | 0,000466 |
| SDHB     | -0,92739 | 0,000422 |
| HSPA13   | -0,92805 | 0,00065  |
| ADAM17   | -0,93025 | 0,00079  |
| AKR1A1   | -0,93085 | 0,000312 |
| TMEM259  | -0,93114 | 0,000259 |
| TMEM248  | -0,93129 | 0,000227 |
| RCC1     | -0,93143 | 0,000103 |
| ACBD3    | -0,93241 | 0,000414 |
| SH3D19   | -0,93384 | 0,000942 |
| TAF12    | -0,93487 | 0,000735 |
| CD2AP    | -0,93621 | 0,00031  |
| TMEM230  | -0,93778 | 0,000377 |
| RNF111   | -0,93829 | 0,000696 |
| DIMT1    | -0,93899 | 0,000297 |
| RBM28    | -0,93905 | 0,000229 |
| SON      | -0,94394 | 0,000295 |
| AKAP11   | -0,94573 | 6,99E-05 |
| C21orf59 | -0,94772 | 0,000447 |
| GOLM1    | -0,95057 | 0,000584 |
| EXOSC2   | -0,95087 | 0,000154 |

|         |          |          |
|---------|----------|----------|
| UBAC2   | -0,95106 | 0,000696 |
| CAPZA1  | -0,95172 | 0,000107 |
| COPS2   | -0,9534  | 0,000266 |
| YKT6    | -0,9586  | 0,000156 |
| CLEC16A | -0,95907 | 0,000782 |
| COPS8   | -0,95985 | 0,000793 |
| SLC6A6  | -0,96071 | 0,000107 |
| PIM3    | -0,96079 | 0,000816 |
| BNIP2   | -0,9615  | 0,000982 |
| CSNK2A1 | -0,96445 | 4,42E-05 |
| NSRP1   | -0,96486 | 0,00065  |
| SIRT7   | -0,96515 | 0,000471 |
| USP48   | -0,96569 | 0,000268 |
| ATP13A3 | -0,96728 | 0,00069  |
| CMTM6   | -0,96746 | 0,000261 |
| TYW1    | -0,97127 | 0,000566 |
| WDR43   | -0,97218 | 0,000482 |
| IPO7    | -0,97332 | 2,34E-05 |
| UBQLN2  | -0,97353 | 0,000361 |
| STRAP   | -0,97366 | 0,000164 |
| AGAP1   | -0,9737  | 0,000925 |
| MAGT1   | -0,97395 | 0,000156 |
| UBQLN1  | -0,97475 | 3,18E-05 |
| DDX55   | -0,97624 | 0,000525 |
| RNGTT   | -0,97764 | 0,001016 |
| OFD1    | -0,97828 | 0,000376 |
| GIGYF2  | -0,97841 | 0,000128 |
| ITSN1   | -0,97854 | 0,000403 |
| STK25   | -0,98033 | 9,17E-05 |
| HDAC1   | -0,98134 | 3,98E-05 |
| IPO9    | -0,98137 | 0,000358 |
| PPIP5K2 | -0,98337 | 0,000342 |
| FHOD1   | -0,985   | 0,00045  |
| ANKRD26 | -0,98534 | 0,000518 |
| GIN54   | -0,98717 | 0,000489 |
| ERI1    | -0,98743 | 0,000695 |
| SSX2IP  | -0,98912 | 0,000681 |
| JMJD1C  | -0,98955 | 0,000535 |
| LRFN4   | -0,98973 | 0,000185 |
| PTPN11  | -0,99033 | 1,45E-05 |
| SMIM12  | -0,99042 | 0,000241 |
| SLC7A6  | -0,99142 | 0,000599 |
| TPP1    | -0,99228 | 0,000738 |
| FAM49B  | -0,99432 | 5,99E-05 |
| LRRFIP1 | -0,99618 | 4,46E-05 |
| AMD1    | -0,99689 | 0,000605 |
| TXNDC12 | -1,00011 | 5,69E-05 |
| NOP9    | -1,00164 | 0,000281 |
| GARS    | -1,00317 | 8,20E-05 |
| ZDHHC5  | -1,00325 | 8,01E-05 |

|         |          |          |
|---------|----------|----------|
| NAA25   | -1,00362 | 8,14E-05 |
| NUS1    | -1,00485 | 0,000236 |
| RDX     | -1,00934 | 0,000508 |
| ICE2    | -1,0098  | 0,000111 |
| ATXN2   | -1,00984 | 8,32E-05 |
| ADSS    | -1,01044 | 0,000381 |
| CDC6    | -1,01294 | 0,000489 |
| SEPT7   | -1,0132  | 0,000132 |
| ABHD5   | -1,01373 | 0,000794 |
| CNP     | -1,01428 | 0,000702 |
| ACD     | -1,01529 | 0,000243 |
| PLEKHA6 | -1,01601 | 0,000256 |
| RSPRY1  | -1,01603 | 0,000108 |
| TBRG4   | -1,01614 | 0,000854 |
| PDCD11  | -1,01874 | 0,000334 |
| WBP11   | -1,01972 | 1,17E-05 |
| PEX5    | -1,02143 | 0,000222 |
| HSPH1   | -1,02158 | 3,01E-05 |
| RPF2    | -1,02403 | 0,000352 |
| PICK1   | -1,02491 | 0,000479 |
| SNRNP40 | -1,02646 | 0,000192 |
| MAP2K1  | -1,02766 | 7,55E-05 |
| DESI1   | -1,02904 | 0,000155 |
| BCCIP   | -1,0301  | 4,73E-05 |
| RAB10   | -1,03029 | 4,61E-06 |
| NOLC1   | -1,03214 | 2,29E-05 |
| FAM111B | -1,03389 | 0,000235 |
| HSPA14  | -1,03407 | 1,80E-05 |
| APEX2   | -1,03475 | 0,000295 |
| RAPGEF6 | -1,03719 | 0,000221 |
| UBR4    | -1,03823 | 0,000631 |
| MCMBP   | -1,03854 | 3,79E-05 |
| DNAJC30 | -1,0402  | 0,000317 |
| ADO     | -1,04108 | 0,000736 |
| SHROOM3 | -1,04131 | 0,000396 |
| MFAP1   | -1,04158 | 0,000651 |
| ERLIN2  | -1,04245 | 8,38E-05 |
| ENTPD4  | -1,04356 | 0,000422 |
| COPS7B  | -1,04377 | 0,00029  |
| NME6    | -1,04652 | 0,000561 |
| EIF4G3  | -1,04698 | 9,03E-06 |
| GTF2H1  | -1,05041 | 5,26E-05 |
| RLF     | -1,05122 | 0,000172 |
| DHX30   | -1,05124 | 4,37E-05 |
| HELLS   | -1,05172 | 0,000222 |
| REXO1   | -1,05177 | 8,24E-05 |
| PDIA3   | -1,05198 | 3,31E-06 |
| SPG7    | -1,05235 | 0,000202 |
| ATP2B1  | -1,0527  | 4,65E-05 |
| BLOC1S6 | -1,05297 | 0,00017  |

|          |          |          |
|----------|----------|----------|
| SPRED2   | -1,05329 | 7,84E-05 |
| UHRF1    | -1,05352 | 0,000899 |
| EIF3D    | -1,05723 | 0,0001   |
| MARS2    | -1,05748 | 0,000401 |
| INTS7    | -1,0598  | 0,000239 |
| APTX     | -1,06446 | 0,000335 |
| HIPK3    | -1,06493 | 0,000165 |
| MPRIP    | -1,06579 | 5,56E-05 |
| DCAKD    | -1,06708 | 0,00087  |
| PGM2     | -1,0679  | 0,000118 |
| BROX     | -1,06967 | 2,77E-05 |
| NUFIP2   | -1,06993 | 7,14E-06 |
| COASY    | -1,07294 | 2,21E-05 |
| KIAA0368 | -1,07379 | 5,87E-05 |
| LPGAT1   | -1,07439 | 0,000151 |
| TFAM     | -1,07532 | 1,08E-05 |
| FAM155B  | -1,07745 | 0,000855 |
| ABHD17B  | -1,07976 | 0,00069  |
| MAP7     | -1,08181 | 2,24E-05 |
| FAM111A  | -1,08214 | 0,000134 |
| RNF216P1 | -1,08595 | 0,00094  |
| CUL5     | -1,08805 | 8,43E-05 |
| ARHGAP11 | -1,08819 | 3,74E-05 |
| PLEKHG2  | -1,08848 | 0,000167 |
| EPT1     | -1,08863 | 0,000104 |
| ZNFX1    | -1,09156 | 0,000951 |
| VPS37A   | -1,09164 | 6,20E-05 |
| MAGOH    | -1,09236 | 0,000128 |
| CHEK1    | -1,09241 | 1,40E-05 |
| PROSC    | -1,09379 | 6,82E-05 |
| TMEM2    | -1,09548 | 0,000271 |
| NOTCH1   | -1,09562 | 0,000133 |
| DES12    | -1,09576 | 4,80E-05 |
| PSMD1    | -1,09676 | 0,000269 |
| GLYR1    | -1,09983 | 5,06E-05 |
| ST7      | -1,10218 | 0,000947 |
| NUDT19   | -1,10249 | 0,000366 |
| PPTC7    | -1,10252 | 0,000273 |
| PCNA     | -1,10259 | 1,85E-06 |
| ERMP1    | -1,10286 | 0,000551 |
| STXBP5   | -1,10568 | 0,000917 |
| CEP170   | -1,10641 | 8,14E-05 |
| AP2B1    | -1,10685 | 1,51E-05 |
| DOK4     | -1,10692 | 0,000205 |
| TMF1     | -1,10737 | 0,000365 |
| MGA      | -1,10772 | 6,29E-05 |
| ACBD5    | -1,10784 | 0,000453 |
| YARS     | -1,10942 | 0,000157 |
| STK24    | -1,11129 | 4,09E-06 |
| ZNF367   | -1,11181 | 0,000246 |

|          |          |          |
|----------|----------|----------|
| EMC3-AS1 | -1,11242 | 0,000286 |
| LACTB2   | -1,11336 | 0,000891 |
| SLC4A7   | -1,11632 | 0,000549 |
| INTS10   | -1,11785 | 0,000126 |
| CHAF1A   | -1,11858 | 8,14E-05 |
| LMNB2    | -1,11913 | 0,00062  |
| EPS15    | -1,12044 | 5,08E-05 |
| CASC5    | -1,12083 | 2,63E-05 |
| MAFK     | -1,12117 | 7,34E-05 |
| GFM1     | -1,1214  | 5,14E-06 |
| PARVB    | -1,1218  | 0,000328 |
| CYSTM1   | -1,12293 | 0,000854 |
| TRABD    | -1,12361 | 3,65E-06 |
| AASDHPPT | -1,12443 | 0,000109 |
| MANF     | -1,12683 | 2,36E-06 |
| HAUS5    | -1,12699 | 0,000373 |
| PPP2CB   | -1,12707 | 3,79E-05 |
| PRPS1    | -1,12796 | 0,000218 |
| MPP6     | -1,12834 | 0,000203 |
| CMTM4    | -1,12844 | 1,34E-06 |
| PLP2     | -1,12879 | 1,18E-05 |
| NDC1     | -1,13031 | 1,38E-06 |
| EBLN3    | -1,13135 | 0,000278 |
| SHCBP1   | -1,13206 | 2,68E-05 |
| MLX      | -1,13237 | 2,12E-06 |
| SBDSP1   | -1,13307 | 9,41E-05 |
| CBY1     | -1,13417 | 0,000329 |
| PRKAA1   | -1,13426 | 0,000663 |
| DNAJA1   | -1,13537 | 0,000237 |
| LONP2    | -1,13597 | 1,01E-05 |
| ITPR3    | -1,13599 | 4,54E-05 |
| M6PR     | -1,13616 | 7,78E-05 |
| PIIP5K1  | -1,138   | 0,000151 |
| GNA11    | -1,13824 | 7,80E-06 |
| HIATL1   | -1,13932 | 0,000191 |
| SBNO2    | -1,1398  | 1,95E-05 |
| SNX14    | -1,14031 | 4,01E-05 |
| PITPNB   | -1,14111 | 3,17E-05 |
| TBC1D20  | -1,14134 | 3,06E-05 |
| CNDP2    | -1,14237 | 4,56E-05 |
| HCCS     | -1,14476 | 0,000346 |
| ITGB1    | -1,14669 | 0,000154 |
| PPP2R2A  | -1,14901 | 2,65E-06 |
| NDUF4F4  | -1,15024 | 0,000201 |
| AK2      | -1,15144 | 3,20E-07 |
| PYCR2    | -1,15168 | 0,000921 |
| GTPBP1   | -1,15198 | 0,000226 |
| TOPBP1   | -1,15237 | 2,78E-06 |
| FBXO41   | -1,15249 | 0,000373 |
| PSMB2    | -1,15249 | 3,47E-07 |

|          |          |          |
|----------|----------|----------|
| TMEM51   | -1,1542  | 0,000305 |
| RPAP1    | -1,15591 | 2,52E-05 |
| HERC2    | -1,1561  | 2,83E-06 |
| WDR36    | -1,15705 | 0,000108 |
| DCUN1D5  | -1,15809 | 9,38E-06 |
| CTNS     | -1,15819 | 0,000224 |
| MALSU1   | -1,1589  | 0,000948 |
| ABCC1    | -1,16182 | 3,99E-06 |
| EMC1     | -1,16223 | 1,25E-06 |
| SERTAD2  | -1,16239 | 1,22E-05 |
| CAPZA2   | -1,16336 | 0,000125 |
| MICA     | -1,16483 | 0,000375 |
| BTAF1    | -1,16555 | 0,000156 |
| MRPS30   | -1,16602 | 2,62E-05 |
| NCKAP1   | -1,16632 | 1,24E-06 |
| MCPH1    | -1,16644 | 7,40E-05 |
| PGM3     | -1,16836 | 0,00067  |
| CAP1     | -1,16933 | 9,72E-06 |
| ARHGEF7  | -1,16958 | 0,000369 |
| ZMPSTE24 | -1,17015 | 4,14E-05 |
| TLN1     | -1,17097 | 0,000329 |
| SLC41A1  | -1,17288 | 4,55E-05 |
| FUCA2    | -1,17336 | 0,000221 |
| PPFIBP1  | -1,17371 | 7,22E-06 |
| SPEN     | -1,17581 | 0,00011  |
| DTX2     | -1,17607 | 0,000401 |
| MELK     | -1,17808 | 8,69E-06 |
| ORC1     | -1,17847 | 6,68E-05 |
| PTPRK    | -1,17952 | 2,29E-06 |
| NUDT15   | -1,17969 | 0,000185 |
| CCBL2    | -1,18151 | 6,23E-05 |
| FAM210A  | -1,18151 | 0,000856 |
| GPD2     | -1,18267 | 1,13E-05 |
| SKP2     | -1,18285 | 1,00E-06 |
| ZFP36    | -1,18329 | 0,000193 |
| DTL      | -1,18399 | 1,93E-05 |
| PDXP     | -1,18477 | 0,000738 |
| POLK     | -1,18522 | 0,000432 |
| MLXIP    | -1,1855  | 1,25E-06 |
| APP      | -1,18555 | 5,60E-07 |
| ARID1B   | -1,18641 | 3,96E-05 |
| IKBKAP   | -1,18714 | 8,71E-07 |
| CCM2     | -1,18775 | 0,000218 |
| REL      | -1,18932 | 8,80E-05 |
| L3MBTL2  | -1,18966 | 3,50E-05 |
| TTLL12   | -1,19317 | 2,59E-06 |
| GCLC     | -1,19475 | 1,22E-05 |
| KANK1    | -1,19544 | 0,000239 |
| PAFAH1B2 | -1,1963  | 2,31E-05 |
| UPF3A    | -1,19676 | 0,000151 |

|           |          |          |
|-----------|----------|----------|
| CORO1C    | -1,19875 | 6,53E-07 |
| CPPED1    | -1,19881 | 0,000159 |
| PTER      | -1,19936 | 4,88E-05 |
| SORBS3    | -1,20038 | 0,000802 |
| MALT1     | -1,20105 | 7,61E-06 |
| MIER2     | -1,20111 | 0,000271 |
| STK38L    | -1,20305 | 1,63E-05 |
| ELOVL6    | -1,20518 | 0,000437 |
| EXOSC9    | -1,20597 | 9,69E-06 |
| LRCH1     | -1,20809 | 1,05E-05 |
| UHL3      | -1,20974 | 0,00062  |
| MAD2L1    | -1,21056 | 3,26E-06 |
| ABCD3     | -1,21205 | 6,59E-06 |
| PELO      | -1,21222 | 1,74E-05 |
| KATNBL1   | -1,21283 | 0,000352 |
| LRRC42    | -1,21403 | 1,04E-05 |
| KIAA0232  | -1,21479 | 4,94E-06 |
| AKIRIN1   | -1,21624 | 1,88E-06 |
| TBC1D14   | -1,21657 | 1,56E-07 |
| FOXRED2   | -1,21788 | 0,000614 |
| NETO2     | -1,21882 | 1,38E-07 |
| SPATA5L1  | -1,21887 | 5,61E-05 |
| PANK4     | -1,21939 | 0,00019  |
| SNTB1     | -1,22168 | 2,85E-05 |
| CHAF1B    | -1,22181 | 3,04E-05 |
| HEXB      | -1,22182 | 3,29E-05 |
| AKIRIN2   | -1,22271 | 0,000234 |
| CCT8      | -1,2232  | 5,16E-08 |
| LRRC47    | -1,22356 | 4,56E-05 |
| NUP50     | -1,22436 | 2,39E-06 |
| LNPEP     | -1,22462 | 0,000331 |
| ARHGEF39  | -1,22773 | 0,000671 |
| GEMIN4    | -1,22911 | 2,96E-05 |
| UBE3A     | -1,22965 | 2,62E-07 |
| TOMM34    | -1,23038 | 6,11E-07 |
| USP40     | -1,23198 | 2,36E-05 |
| PAQR8     | -1,23388 | 0,000983 |
| GXYLT1    | -1,23602 | 1,66E-05 |
| ZNF532    | -1,23614 | 0,000651 |
| SECISBP2L | -1,23678 | 0,000752 |
| URB1      | -1,23787 | 5,84E-07 |
| MAK16     | -1,23877 | 0,000455 |
| UTP11L    | -1,24239 | 2,79E-06 |
| TWF2      | -1,24311 | 0,000163 |
| C12orf4   | -1,24438 | 0,000282 |
| ARHGEF18  | -1,24511 | 1,74E-05 |
| KAT6A     | -1,24569 | 3,20E-05 |
| FTO       | -1,24637 | 9,41E-06 |
| RAB3GAP2  | -1,24714 | 9,20E-06 |
| FNDC3B    | -1,24739 | 5,41E-07 |

|           |          |          |
|-----------|----------|----------|
| TTLL4     | -1,24783 | 2,27E-05 |
| LHFPL2    | -1,2489  | 1,11E-05 |
| ADRBK2    | -1,24974 | 3,08E-05 |
| NUP155    | -1,2505  | 5,97E-06 |
| NUPL1     | -1,25332 | 2,12E-05 |
| DHDDS     | -1,25334 | 0,000614 |
| LPCAT1    | -1,25348 | 8,35E-07 |
| SPATS2L   | -1,25378 | 3,38E-06 |
| IRF6      | -1,2539  | 8,94E-05 |
| FAAP20    | -1,25489 | 1,95E-05 |
| TMEM59    | -1,25788 | 0,000155 |
| ICMT      | -1,25931 | 1,28E-06 |
| BAP1      | -1,25952 | 3,42E-06 |
| EZR       | -1,25986 | 0,000124 |
| CYB5R3    | -1,26033 | 6,06E-05 |
| CLDN4     | -1,26125 | 0,000173 |
| DNA2      | -1,26171 | 8,34E-05 |
| TOM1L2    | -1,26207 | 0,000298 |
| NIPA1     | -1,2629  | 2,29E-05 |
| TAF5L     | -1,26392 | 1,60E-06 |
| POR       | -1,26461 | 2,55E-05 |
| SNX9      | -1,26531 | 5,21E-06 |
| ADIPOR2   | -1,26631 | 7,87E-08 |
| EYA3      | -1,26736 | 2,16E-05 |
| DCAF12    | -1,26776 | 1,20E-06 |
| MLKL      | -1,26842 | 3,49E-05 |
| DVL1      | -1,26964 | 1,89E-06 |
| MARCKS    | -1,27056 | 1,31E-06 |
| RBBP8     | -1,27083 | 8,29E-05 |
| APPL1     | -1,2714  | 1,67E-07 |
| SAMD8     | -1,27197 | 0,000428 |
| GART      | -1,27299 | 3,37E-08 |
| ARHGAP18  | -1,2734  | 0,000145 |
| ST6GALNA4 | -1,27352 | 0,000276 |
| CBR1      | -1,27463 | 1,93E-05 |
| DIEXF     | -1,27474 | 0,000291 |
| SNAPC3    | -1,27535 | 0,000418 |
| AKIP1     | -1,27686 | 0,000139 |
| LTV1      | -1,27692 | 0,000538 |
| EPB41     | -1,27806 | 1,20E-05 |
| MTF1      | -1,27827 | 1,17E-05 |
| ILKAP     | -1,27835 | 0,000203 |
| ATP1B1    | -1,27967 | 8,45E-07 |
| PEX14     | -1,27987 | 2,81E-05 |
| SLC30A1   | -1,28011 | 0,000102 |
| NXN       | -1,28046 | 0,000209 |
| SF3A3     | -1,28178 | 6,41E-05 |
| TMUB1     | -1,28193 | 1,62E-06 |
| RGP1      | -1,28269 | 0,000264 |
| MAPKAPK3  | -1,28443 | 3,96E-05 |



|          |          |          |
|----------|----------|----------|
| MKLN1    | -1,28459 | 8,89E-08 |
| STARD3NL | -1,285   | 0,000601 |
| PRPF4    | -1,28599 | 1,00E-07 |
| GPATCH11 | -1,28648 | 0,000973 |
| SDC1     | -1,28864 | 6,98E-07 |
| KCTD9    | -1,29038 | 7,01E-06 |
| SLC26A6  | -1,29072 | 6,85E-06 |
| PDPR     | -1,29102 | 1,22E-06 |
| COA7     | -1,29155 | 0,000124 |
| FAM122A  | -1,29183 | 9,95E-05 |
| MED4     | -1,29202 | 8,34E-05 |
| TOMM40L  | -1,29226 | 0,000102 |
| SLC35A2  | -1,29244 | 4,46E-06 |
| SPTY2D1  | -1,29436 | 2,11E-05 |
| BRI3BP   | -1,29517 | 3,10E-05 |
| PPIL4    | -1,29613 | 1,99E-06 |
| JOSD1    | -1,29673 | 7,70E-08 |
| ago-03   | -1,29956 | 0,000376 |
| TRAK1    | -1,3     | 2,46E-06 |
| ATP6V1B2 | -1,30003 | 1,64E-07 |
| MAP2K3   | -1,30027 | 0,000348 |
| SLBP     | -1,30041 | 6,24E-07 |
| SPTBN1   | -1,30203 | 9,92E-09 |
| ZYX      | -1,30308 | 1,88E-05 |
| EDRF1    | -1,30404 | 4,22E-05 |
| NUMBL    | -1,30405 | 2,84E-05 |
| KDM4C    | -1,30625 | 0,000234 |
| NECAP1   | -1,30641 | 1,11E-06 |
| PTPN14   | -1,30662 | 0,000743 |
| CCT6A    | -1,30668 | 3,59E-09 |
| DDI2     | -1,3081  | 0,000702 |
| GOSR1    | -1,3098  | 1,28E-06 |
| LDHA     | -1,30993 | 5,54E-08 |
| TEAD1    | -1,31015 | 1,67E-06 |
| STK17B   | -1,31079 | 0,000519 |
| PKP2     | -1,31137 | 0,000855 |
| ROCK2    | -1,31138 | 7,69E-07 |
| CALU     | -1,31161 | 5,66E-08 |
| ACADVL   | -1,3122  | 0,000437 |
| SEC23A   | -1,31279 | 9,55E-06 |
| DNTTIP2  | -1,31311 | 2,85E-07 |
| ATP13A2  | -1,31438 | 0,000147 |
| LRRC8B   | -1,31586 | 3,21E-06 |
| WDFY1    | -1,31619 | 3,59E-07 |
| NF2      | -1,31632 | 3,76E-05 |
| TBPL1    | -1,31716 | 9,41E-05 |
| SMCR8    | -1,31947 | 6,41E-08 |
| MESDC1   | -1,3209  | 2,34E-05 |
| TNFRSF21 | -1,32206 | 2,44E-06 |
| HIGD1A   | -1,32288 | 8,33E-07 |

|          |          |          |
|----------|----------|----------|
| ACADM    | -1,32685 | 0,000287 |
| USPL1    | -1,32799 | 0,000591 |
| ZBTB38   | -1,32827 | 3,06E-06 |
| FZD5     | -1,32897 | 7,36E-06 |
| INF2     | -1,33073 | 6,87E-06 |
| BIRC6    | -1,33193 | 9,36E-07 |
| OTUD4    | -1,33209 | 5,34E-06 |
| MANEAL   | -1,33239 | 2,16E-05 |
| RNF38    | -1,33525 | 8,47E-06 |
| C6orf132 | -1,33602 | 8,10E-06 |
| ZNF770   | -1,33616 | 0,000229 |
| NPRL2    | -1,33631 | 2,19E-05 |
| LAD1     | -1,33685 | 2,89E-06 |
| TXLNG    | -1,33706 | 4,24E-06 |
| KCNH2    | -1,33838 | 0,000864 |
| UFL1     | -1,33853 | 4,80E-05 |
| LIMA1    | -1,34137 | 0,000745 |
| SIRT2    | -1,34157 | 0,00035  |
| RRP7A    | -1,34226 | 3,66E-08 |
| TST      | -1,34313 | 0,000102 |
| C6orf203 | -1,34339 | 0,000355 |
| DCAF17   | -1,34554 | 0,000152 |
| PTDSS2   | -1,34958 | 0,000915 |
| SLC41A2  | -1,35081 | 0,000469 |
| EPRS     | -1,3515  | 6,54E-10 |
| ADCY3    | -1,35215 | 1,25E-07 |
| PHKA1    | -1,35469 | 7,68E-06 |
| SEPT2    | -1,35545 | 1,56E-07 |
| ACAP3    | -1,35552 | 8,31E-05 |
| LCOR     | -1,35734 | 4,20E-06 |
| KLHL2    | -1,35746 | 0,000274 |
| TYW3     | -1,3576  | 7,36E-06 |
| KDM5C    | -1,35882 | 4,68E-09 |
| KPNA6    | -1,36079 | 2,15E-08 |
| BUB1B    | -1,36099 | 0,000184 |
| XPNPEP3  | -1,36299 | 4,33E-07 |
| PFKFB3   | -1,36331 | 0,000706 |
| MAP3K10  | -1,36333 | 4,30E-05 |
| AEBP2    | -1,36394 | 1,45E-05 |
| FUCA1    | -1,364   | 0,000159 |
| BTBD3    | -1,3654  | 2,34E-06 |
| ZFR      | -1,36548 | 6,31E-06 |
| KIAA0020 | -1,36724 | 6,88E-05 |
| ZNF106   | -1,36804 | 3,80E-09 |
| SLC18B1  | -1,36884 | 0,000337 |
| PPARGC1B | -1,36887 | 0,000835 |
| NF1      | -1,36978 | 7,92E-06 |
| WRN      | -1,37011 | 0,000128 |
| RAB29    | -1,37012 | 8,89E-05 |
| MED8     | -1,37093 | 1,63E-05 |

|          |          |          |
|----------|----------|----------|
| UTP6     | -1,37169 | 1,64E-07 |
| XPO4     | -1,3724  | 8,60E-09 |
| FSCN1    | -1,37291 | 6,35E-05 |
| ARFGEF3  | -1,37356 | 0,000181 |
| FOXN2    | -1,374   | 0,000435 |
| HSF2     | -1,37644 | 2,01E-05 |
| ME1      | -1,37708 | 0,000452 |
| FOXO3    | -1,37727 | 0,000845 |
| CHAMP1   | -1,37727 | 9,06E-06 |
| ASCC3    | -1,3776  | 8,40E-05 |
| PIDD1    | -1,37784 | 8,34E-05 |
| NDUFAF1  | -1,37857 | 0,00037  |
| MORC3    | -1,37874 | 0,000158 |
| TAP2     | -1,38066 | 0,000173 |
| MTRR     | -1,38104 | 0,000227 |
| EFNA5    | -1,38138 | 0,000561 |
| DSCR3    | -1,38158 | 3,23E-06 |
| RUNX1    | -1,38273 | 4,53E-06 |
| ACAT1    | -1,38279 | 0,000745 |
| MTRF1L   | -1,38457 | 2,94E-06 |
| TMEM120E | -1,38513 | 2,25E-05 |
| SSH2     | -1,38543 | 2,00E-05 |
| NIPA2    | -1,38578 | 1,18E-06 |
| ANLN     | -1,38584 | 4,19E-10 |
| DDX21    | -1,38704 | 2,35E-07 |
| POM121   | -1,38736 | 3,26E-05 |
| PTS      | -1,38794 | 0,000296 |
| CLCN3    | -1,38875 | 2,09E-09 |
| DDX52    | -1,38898 | 8,04E-08 |
| NBEAL2   | -1,39052 | 5,69E-06 |
| LRRC41   | -1,39116 | 3,77E-07 |
| ACACA    | -1,39208 | 1,04E-09 |
| VPS37B   | -1,39241 | 5,60E-08 |
| ATP8B1   | -1,39441 | 2,53E-07 |
| YRDC     | -1,3952  | 2,74E-06 |
| PALLD    | -1,39567 | 0,000763 |
| ZCCHC7   | -1,39567 | 9,02E-06 |
| LIMD1    | -1,39633 | 3,34E-06 |
| TMEM201  | -1,39682 | 7,96E-05 |
| SLC45A4  | -1,39688 | 0,000145 |
| FBXO28   | -1,39968 | 8,56E-05 |
| ELOVL5   | -1,39998 | 2,92E-10 |
| RNF219   | -1,40039 | 8,33E-07 |
| BET1L    | -1,40253 | 4,22E-07 |
| RAD54L   | -1,40352 | 3,10E-05 |
| CARS2    | -1,40365 | 3,51E-07 |
| CTDSPL2  | -1,40903 | 2,49E-06 |
| PHF19    | -1,40927 | 1,65E-07 |
| CFAP97   | -1,41019 | 2,23E-06 |
| PDDC1    | -1,41121 | 0,000172 |

|          |          |          |
|----------|----------|----------|
| IPO11    | -1,41222 | 3,07E-06 |
| YIPF6    | -1,41283 | 3,83E-07 |
| ANKRD10  | -1,41314 | 0,000393 |
| SLC23A2  | -1,41378 | 7,63E-07 |
| BAG4     | -1,41397 | 3,81E-06 |
| PIM2     | -1,41851 | 5,77E-05 |
| FIGNL1   | -1,41979 | 4,99E-07 |
| BAZ2A    | -1,42    | 1,66E-09 |
| PDP1     | -1,42122 | 3,99E-07 |
| SIPA1L3  | -1,42355 | 1,62E-06 |
| PPM1F    | -1,42514 | 0,000855 |
| NUP98    | -1,42616 | 1,66E-09 |
| NGLY1    | -1,42667 | 1,12E-06 |
| SH3KBP1  | -1,42985 | 5,69E-05 |
| C9orf40  | -1,43034 | 8,50E-06 |
| SRSF4    | -1,43057 | 4,93E-08 |
| PPP1R26  | -1,43125 | 1,72E-07 |
| SLC39A10 | -1,43155 | 1,78E-06 |
| FAM8A1   | -1,43305 | 7,32E-05 |
| DOCK1    | -1,43315 | 2,48E-06 |
| DEDD2    | -1,43338 | 9,20E-05 |
| TRIP12   | -1,4356  | 5,13E-05 |
| SMC5     | -1,43736 | 4,65E-08 |
| ANKRD17  | -1,43746 | 1,18E-09 |
| PTPN3    | -1,43918 | 5,57E-08 |
| RGS19    | -1,44078 | 0,000786 |
| RHPN2    | -1,44156 | 4,66E-07 |
| CHUK     | -1,44181 | 1,88E-07 |
| CMIP     | -1,4421  | 9,22E-07 |
| DNAJC16  | -1,44277 | 8,23E-06 |
| VKORC1L1 | -1,44302 | 5,03E-10 |
| PHF8     | -1,44334 | 1,00E-07 |
| USP24    | -1,44364 | 4,12E-08 |
| MCM8     | -1,44445 | 3,21E-08 |
| USP45    | -1,44601 | 0,000244 |
| IRF1     | -1,44751 | 0,000296 |
| TEX30    | -1,44824 | 0,000228 |
| PRMT3    | -1,44998 | 4,28E-05 |
| XYLB     | -1,45031 | 0,000446 |
| DR1      | -1,4504  | 9,37E-09 |
| ADCY7    | -1,45251 | 0,000261 |
| TXNRD1   | -1,45352 | 5,46E-05 |
| CASP8AP2 | -1,45398 | 1,11E-05 |
| PRELID2  | -1,45438 | 4,06E-05 |
| CCDC51   | -1,45631 | 3,77E-07 |
| RABGGTB  | -1,45639 | 0,000209 |
| OSGEP    | -1,4572  | 5,10E-06 |
| MTUS1    | -1,4582  | 3,00E-07 |
| PAPD5    | -1,46308 | 8,10E-08 |
| NFAT5    | -1,46312 | 0,000158 |

|           |          |          |
|-----------|----------|----------|
| JAG2      | -1,4644  | 2,51E-07 |
| NUDC      | -1,46585 | 1,44E-05 |
| FARP2     | -1,46781 | 0,000118 |
| TMEM180   | -1,46794 | 5,01E-05 |
| RBM26     | -1,46828 | 9,86E-08 |
| KIAA0754  | -1,46878 | 0,00062  |
| CTSB      | -1,47043 | 6,45E-05 |
| GALK2     | -1,47146 | 5,28E-06 |
| TRMT6     | -1,47287 | 7,96E-09 |
| SLC25A19  | -1,47342 | 5,64E-06 |
| NUP133    | -1,47354 | 1,72E-09 |
| PMAIP1    | -1,47365 | 0,000673 |
| SPAG9     | -1,47388 | 7,00E-08 |
| PTPRJ     | -1,47774 | 7,88E-07 |
| STAG3L2   | -1,481   | 0,000325 |
| TRMU      | -1,48116 | 1,09E-06 |
| CAB39     | -1,4813  | 6,85E-10 |
| RAD54L2   | -1,48238 | 5,54E-05 |
| MTMR2     | -1,4828  | 1,34E-06 |
| RPL23AP53 | -1,48355 | 0,000695 |
| ATG16L1   | -1,4842  | 1,91E-07 |
| ARFGEF1   | -1,4868  | 1,38E-08 |
| MANEA     | -1,48684 | 0,00026  |
| TIPARP    | -1,48842 | 4,06E-06 |
| TUBGCP3   | -1,48921 | 1,67E-08 |
| UTP14C    | -1,49021 | 6,01E-06 |
| SLC20A2   | -1,49104 | 2,78E-09 |
| ABHD10    | -1,49144 | 6,04E-07 |
| CLCN5     | -1,49236 | 4,58E-06 |
| VCL       | -1,4927  | 3,06E-05 |
| RIF1      | -1,49361 | 1,06E-07 |
| P3H1      | -1,49445 | 4,17E-06 |
| NAB1      | -1,49787 | 2,84E-05 |
| ARIH2     | -1,4985  | 2,29E-10 |
| NABP1     | -1,49917 | 1,69E-05 |
| INTS6     | -1,50039 | 1,49E-05 |
| CMPK1     | -1,50092 | 4,34E-06 |
| CNOT1     | -1,50123 | 1,16E-09 |
| MINK1     | -1,50294 | 1,09E-05 |
| NPAS2     | -1,50309 | 0,000589 |
| KDM6A     | -1,50376 | 2,53E-05 |
| COL4A3BP  | -1,50554 | 4,01E-08 |
| DIS3      | -1,50609 | 1,04E-09 |
| FAR1      | -1,50914 | 2,76E-06 |
| KPNA3     | -1,50944 | 5,07E-08 |
| EDEM1     | -1,50949 | 2,76E-05 |
| KLF13     | -1,51    | 1,33E-09 |
| TANGO6    | -1,51087 | 9,65E-06 |
| ENPP4     | -1,51125 | 0,000673 |
| TRIM44    | -1,51132 | 1,60E-10 |

|          |          |          |
|----------|----------|----------|
| PIGW     | -1,51234 | 5,64E-06 |
| DNAJC24  | -1,51249 | 0,000167 |
| TLN2     | -1,51501 | 0,000535 |
| LRRC16A  | -1,51667 | 2,16E-05 |
| FOXK1    | -1,51767 | 4,60E-08 |
| SUZ12    | -1,51863 | 2,08E-11 |
| NFIA     | -1,51865 | 3,03E-06 |
| CUL4A    | -1,51963 | 3,72E-09 |
| SLC5A3   | -1,51992 | 3,46E-07 |
| PIBF1    | -1,52059 | 0,000358 |
| CBFB     | -1,5214  | 5,23E-10 |
| VPS13C   | -1,52296 | 4,42E-06 |
| NKTR     | -1,52595 | 6,11E-05 |
| PFKFB2   | -1,52716 | 2,44E-07 |
| TOE1     | -1,52839 | 3,87E-05 |
| HIAT1    | -1,52856 | 3,88E-08 |
| PCSK7    | -1,53002 | 4,91E-05 |
| MIEF1    | -1,53136 | 9,36E-08 |
| C1GALT1  | -1,53156 | 2,35E-07 |
| FNTA     | -1,53166 | 1,11E-08 |
| AGL      | -1,53415 | 1,28E-09 |
| MAP7D1   | -1,53575 | 4,27E-06 |
| ITGB4    | -1,5359  | 9,41E-07 |
| API5     | -1,53709 | 7,01E-11 |
| RCAN1    | -1,54013 | 0,000466 |
| TPCN1    | -1,54029 | 2,12E-08 |
| RMDN3    | -1,54096 | 1,34E-06 |
| RNF126   | -1,54156 | 4,12E-06 |
| NEIL2    | -1,54255 | 1,73E-07 |
| DFFA     | -1,54363 | 7,40E-10 |
| SLC16A1  | -1,54462 | 3,76E-10 |
| TPP2     | -1,54611 | 2,98E-08 |
| DEGS1    | -1,55233 | 8,17E-06 |
| SERPINB1 | -1,55316 | 5,02E-09 |
| IFNGR2   | -1,55389 | 1,20E-05 |
| ZNF827   | -1,55472 | 0,000559 |
| MON1A    | -1,55553 | 8,01E-05 |
| FAM83G   | -1,55569 | 3,63E-08 |
| TMED4    | -1,55809 | 3,13E-10 |
| FNIP1    | -1,5627  | 3,87E-09 |
| MYO19    | -1,56394 | 1,79E-10 |
| TERF2    | -1,56415 | 1,41E-08 |
| CASC4    | -1,56461 | 3,61E-08 |
| GATA6    | -1,56503 | 0,000284 |
| HK2      | -1,56583 | 2,16E-05 |
| USB1     | -1,56795 | 2,05E-05 |
| KIAA1468 | -1,56913 | 6,81E-07 |
| NAPEPLD  | -1,57266 | 5,30E-05 |
| MYO5B    | -1,57366 | 9,72E-09 |
| GCFC2    | -1,57748 | 0,00053  |

|          |          |          |
|----------|----------|----------|
| PLEKHA1  | -1,57817 | 1,32E-06 |
| ERO1A    | -1,58101 | 4,38E-09 |
| NRARP    | -1,58151 | 0,000167 |
| PP7080   | -1,58234 | 2,09E-07 |
| PLSCR1   | -1,58387 | 0,000438 |
| FAM213B  | -1,58411 | 2,21E-08 |
| RNPEPL1  | -1,58434 | 1,21E-05 |
| RHOBTB2  | -1,58582 | 0,000238 |
| GNPDA1   | -1,58886 | 1,12E-07 |
| NEDD4    | -1,58916 | 4,74E-09 |
| TCIRG1   | -1,58922 | 1,66E-05 |
| ADGRG1   | -1,58993 | 3,14E-07 |
| FUT10    | -1,59098 | 0,000737 |
| CC2D1B   | -1,59284 | 6,89E-10 |
| SUGT1    | -1,59358 | 5,11E-08 |
| SIM2     | -1,59653 | 0,000258 |
| TCF20    | -1,59981 | 5,50E-11 |
| STK4     | -1,60093 | 5,26E-11 |
| SHROOM1  | -1,60247 | 4,92E-06 |
| S100A14  | -1,60297 | 3,41E-06 |
| URB2     | -1,60509 | 3,73E-10 |
| SNRK     | -1,60565 | 5,64E-08 |
| JMJD6    | -1,6061  | 2,01E-05 |
| TTC33    | -1,60683 | 0,000116 |
| CPD      | -1,60755 | 4,06E-10 |
| LGALSL   | -1,60765 | 1,18E-06 |
| CCNE1    | -1,60927 | 0,000137 |
| DONSON   | -1,61527 | 9,25E-08 |
| JRKL     | -1,61654 | 0,000918 |
| ZBED6CL  | -1,61864 | 0,000108 |
| SHC1     | -1,61874 | 1,98E-12 |
| PHIP     | -1,61935 | 5,54E-10 |
| CLSPN    | -1,62015 | 1,19E-11 |
| SFN      | -1,62153 | 9,06E-06 |
| SLC25A25 | -1,62313 | 4,94E-05 |
| USP9X    | -1,62328 | 2,67E-08 |
| CTSH     | -1,62387 | 1,98E-05 |
| UBA3     | -1,62716 | 4,24E-08 |
| HAUS6    | -1,62775 | 1,60E-10 |
| CSPP1    | -1,62863 | 1,95E-05 |
| DNMBP    | -1,63007 | 5,69E-05 |
| RTCA     | -1,63082 | 8,08E-10 |
| RPS6KA1  | -1,63245 | 7,23E-06 |
| GOLT1A   | -1,63442 | 5,18E-06 |
| KIF1B    | -1,63482 | 1,36E-07 |
| POMZP3   | -1,63692 | 0,000129 |
| EXT1     | -1,63755 | 4,57E-07 |
| NOL9     | -1,64083 | 9,09E-09 |
| IL6ST    | -1,64093 | 1,12E-08 |
| SASS6    | -1,64123 | 0,000294 |

|          |          |          |
|----------|----------|----------|
| PDZD8    | -1,64434 | 1,34E-07 |
| FAM76A   | -1,64501 | 0,000863 |
| U2SURP   | -1,64578 | 1,04E-12 |
| CLN5     | -1,64813 | 0,000551 |
| SEPN1    | -1,64833 | 1,52E-10 |
| SLC12A8  | -1,65017 | 2,97E-06 |
| MAPK12   | -1,65036 | 7,87E-06 |
| DHRS1    | -1,65265 | 0,000402 |
| TMED8    | -1,6539  | 0,000988 |
| HSPG2    | -1,65887 | 3,90E-07 |
| PDP2     | -1,66204 | 5,96E-09 |
| GMDS     | -1,66371 | 2,29E-10 |
| FUT11    | -1,66533 | 8,39E-05 |
| VPS54    | -1,66614 | 2,20E-08 |
| CTNNB1   | -1,66685 | 4,10E-05 |
| MTMR10   | -1,66847 | 3,91E-06 |
| KLHL21   | -1,66884 | 1,18E-08 |
| HES4     | -1,67056 | 1,40E-06 |
| IER3     | -1,67084 | 6,65E-10 |
| HOXB7    | -1,67234 | 2,56E-07 |
| SERPINB8 | -1,67252 | 0,000948 |
| RNF213   | -1,67413 | 1,49E-06 |
| UGGT2    | -1,6742  | 0,000335 |
| NSUN5P1  | -1,67534 | 0,000472 |
| CASK     | -1,67548 | 2,64E-11 |
| TCF12    | -1,67566 | 1,29E-07 |
| SLC30A7  | -1,6779  | 2,01E-06 |
| C4orf32  | -1,67878 | 0,000116 |
| XKR8     | -1,6789  | 0,000101 |
| BCL2L2   | -1,68071 | 0,000383 |
| EHD4     | -1,68189 | 2,13E-08 |
| TMED5    | -1,68202 | 8,66E-08 |
| TCF7     | -1,68223 | 2,75E-05 |
| ARHGEF16 | -1,68236 | 1,83E-08 |
| MKNK2    | -1,68256 | 7,39E-12 |
| ANO6     | -1,68282 | 6,43E-10 |
| ATP7B    | -1,68387 | 4,11E-05 |
| ZNF697   | -1,68676 | 1,40E-05 |
| TRMT2A   | -1,68692 | 2,41E-09 |
| ETNK1    | -1,68795 | 6,21E-11 |
| GK       | -1,68816 | 0,000561 |
| PGM1     | -1,68846 | 1,34E-06 |
| TMEM63A  | -1,68961 | 3,23E-07 |
| PDLIM5   | -1,69079 | 5,94E-08 |
| OSBP     | -1,69188 | 1,44E-12 |
| LIN7C    | -1,69239 | 1,58E-05 |
| C10orf12 | -1,69419 | 1,98E-05 |
| MYO18A   | -1,69496 | 4,56E-07 |
| SZT2     | -1,69534 | 2,72E-07 |
| DENND4C  | -1,69831 | 6,99E-11 |



|          |          |          |
|----------|----------|----------|
| SLC35A3  | -1,69869 | 1,14E-05 |
| FAM81A   | -1,69902 | 6,66E-05 |
| CXorf38  | -1,69917 | 1,67E-07 |
| CHORDC1  | -1,69981 | 3,67E-08 |
| PLK3     | -1,70233 | 0,000715 |
| NFKB1    | -1,70565 | 9,61E-07 |
| BIRC2    | -1,7061  | 1,30E-05 |
| IPO5     | -1,70631 | 5,67E-16 |
| HECA     | -1,70843 | 0,000516 |
| ALDH1B1  | -1,71132 | 8,16E-13 |
| TMEM45B  | -1,71159 | 1,94E-10 |
| GATA2    | -1,71373 | 8,11E-06 |
| SGK223   | -1,71374 | 2,41E-08 |
| SORL1    | -1,71534 | 3,42E-06 |
| ST14     | -1,71683 | 1,10E-07 |
| GOPC     | -1,71818 | 1,27E-10 |
| GLB1L2   | -1,72339 | 9,34E-07 |
| STAT3    | -1,72545 | 2,15E-06 |
| SLC25A20 | -1,72573 | 0,000477 |
| PSAT1    | -1,72636 | 0,00017  |
| FAM126A  | -1,7267  | 3,26E-06 |
| ITGA2    | -1,72737 | 1,56E-07 |
| HSPA12A  | -1,72828 | 6,99E-05 |
| TSPO     | -1,72958 | 1,75E-13 |
| MYO1B    | -1,73068 | 2,24E-15 |
| SDCCAG8  | -1,73195 | 4,99E-07 |
| FAM219A  | -1,73317 | 0,000132 |
| RRAGD    | -1,73389 | 0,000147 |
| TMEM62   | -1,73426 | 5,78E-09 |
| NOCT     | -1,73709 | 1,04E-06 |
| ZBED1    | -1,73861 | 3,18E-08 |
| TUBGCP4  | -1,74331 | 5,46E-11 |
| SGK1     | -1,74372 | 0,000448 |
| DNAJC22  | -1,74377 | 4,38E-05 |
| ACSL4    | -1,74558 | 9,07E-07 |
| NAA16    | -1,75078 | 0,000286 |
| SACM1L   | -1,75107 | 1,13E-07 |
| DDX10    | -1,75202 | 2,04E-13 |
| TCEB3    | -1,75282 | 1,27E-12 |
| RNF145   | -1,75556 | 3,87E-05 |
| SLC35D1  | -1,75608 | 1,42E-07 |
| ETHE1    | -1,75748 | 1,97E-06 |
| FTL      | -1,75784 | 9,27E-06 |
| STK40    | -1,76184 | 1,57E-08 |
| HMGA1    | -1,7647  | 4,23E-09 |
| SLC8B1   | -1,76509 | 2,31E-06 |
| GALNT7   | -1,77057 | 2,33E-07 |
| FAM221A  | -1,77869 | 3,28E-05 |
| TOLLIP   | -1,781   | 2,03E-06 |
| SUCLA2   | -1,78115 | 4,36E-11 |

|          |          |          |
|----------|----------|----------|
| GAS6     | -1,78246 | 9,83E-08 |
| CDC42EP5 | -1,78254 | 0,000142 |
| LIMK2    | -1,78476 | 1,02E-08 |
| PACSIN2  | -1,7851  | 5,42E-12 |
| ASCL2    | -1,78549 | 4,98E-05 |
| NCEH1    | -1,78784 | 4,40E-07 |
| CDC42BPA | -1,78988 | 3,58E-09 |
| DYNLT3   | -1,79017 | 0,000357 |
| PATL1    | -1,79158 | 2,17E-13 |
| SYNJ2    | -1,79227 | 6,92E-11 |
| LRP8     | -1,79578 | 9,20E-10 |
| LMBRD2   | -1,79587 | 3,49E-07 |
| MIB2     | -1,79657 | 5,49E-08 |
| KLC3     | -1,79707 | 0,000375 |
| PINK1-AS | -1,79736 | 2,38E-05 |
| TUBE1    | -1,79859 | 0,000116 |
| MAP2     | -1,79868 | 3,52E-05 |
| INPP5B   | -1,79977 | 4,55E-07 |
| SLC10A7  | -1,80099 | 0,000133 |
| FBXO30   | -1,80845 | 3,55E-10 |
| TXN      | -1,8097  | 7,86E-09 |
| ZNF37BP  | -1,81049 | 3,98E-08 |
| TMEM135  | -1,81071 | 7,37E-07 |
| NT5DC3   | -1,81246 | 8,05E-08 |
| HOOK1    | -1,81542 | 2,58E-11 |
| VWA1     | -1,81817 | 1,59E-06 |
| SMC1A    | -1,81874 | 3,03E-13 |
| KLHL18   | -1,82297 | 2,93E-11 |
| LACC1    | -1,82389 | 0,000367 |
| PPP1R18  | -1,82544 | 1,96E-11 |
| MROH6    | -1,82813 | 1,85E-08 |
| SBDS     | -1,82857 | 3,55E-14 |
| PRPS2    | -1,82862 | 1,42E-09 |
| MFSD2A   | -1,83168 | 6,32E-06 |
| SLC7A11  | -1,83176 | 3,03E-11 |
| FAM3C    | -1,83599 | 3,03E-12 |
| CYB5B    | -1,8368  | 1,38E-10 |
| NCAPD3   | -1,83807 | 7,42E-10 |
| HDHD1    | -1,83831 | 8,60E-08 |
| CORO1A   | -1,83921 | 3,52E-05 |
| PNP      | -1,84142 | 2,45E-13 |
| FURIN    | -1,84253 | 1,50E-12 |
| SLC39A14 | -1,84351 | 5,95E-06 |
| DNAJA4   | -1,84409 | 4,51E-09 |
| MIER1    | -1,8446  | 2,41E-13 |
| DOPEY1   | -1,84919 | 1,32E-06 |
| CTSC     | -1,84932 | 2,05E-11 |
| NDRG1    | -1,84947 | 7,45E-06 |
| SLC7A8   | -1,85031 | 0,000136 |
| ADAM10   | -1,85129 | 1,70E-12 |

|           |          |          |
|-----------|----------|----------|
| PVR       | -1,85217 | 2,08E-06 |
| IMPA1     | -1,85257 | 4,93E-08 |
| FRAS1     | -1,85575 | 4,33E-12 |
| ARID3A    | -1,85715 | 0,001013 |
| CPEB4     | -1,85755 | 0,000387 |
| PNPLA4    | -1,86256 | 4,08E-06 |
| IRF7      | -1,86305 | 0,000119 |
| ADAT2     | -1,86425 | 6,23E-05 |
| EFHD2     | -1,86625 | 4,90E-10 |
| UBR1      | -1,86718 | 2,58E-06 |
| QSOX2     | -1,869   | 8,35E-08 |
| KCNC4     | -1,86994 | 0,000125 |
| PANK2     | -1,87605 | 4,42E-10 |
| JAK1      | -1,87621 | 5,69E-12 |
| NR6A1     | -1,87776 | 3,27E-06 |
| SH2D3A    | -1,88135 | 7,64E-07 |
| GALNT2    | -1,88222 | 6,42E-15 |
| MYO1E     | -1,88271 | 1,96E-05 |
| GSR       | -1,88363 | 1,76E-13 |
| WDR81     | -1,88568 | 1,08E-10 |
| DOCK9     | -1,88749 | 1,80E-11 |
| MAPKBP1   | -1,88868 | 6,22E-06 |
| ABHD3     | -1,88872 | 1,93E-05 |
| EIF2AK4   | -1,88893 | 1,89E-14 |
| FAM126B   | -1,89656 | 3,75E-08 |
| RELT      | -1,89748 | 1,88E-08 |
| RCBTB1    | -1,89914 | 4,19E-07 |
| ADCY9     | -1,90006 | 3,92E-08 |
| CLCN2     | -1,90064 | 0,000139 |
| TMEM55A   | -1,90224 | 1,62E-06 |
| RPP25     | -1,90234 | 1,13E-11 |
| GFPT1     | -1,90847 | 4,33E-18 |
| NSUN5P2   | -1,91444 | 0,000728 |
| INPP5J    | -1,9149  | 3,45E-05 |
| LPCAT4    | -1,91549 | 1,38E-05 |
| FZD9      | -1,91881 | 0,000982 |
| PRTFDC1   | -1,92004 | 1,83E-05 |
| AP1S3     | -1,92129 | 1,57E-08 |
| CYP4F11   | -1,92225 | 6,72E-05 |
| SDE2      | -1,92384 | 6,33E-06 |
| SYBU      | -1,9305  | 9,69E-06 |
| SLC25A22  | -1,9315  | 6,99E-15 |
| MYO10     | -1,93559 | 2,33E-11 |
| LPIN2     | -1,93769 | 9,08E-11 |
| CDK12     | -1,93839 | 3,63E-15 |
| EOGT      | -1,93862 | 1,53E-06 |
| LOC100506 | -1,9421  | 4,97E-05 |
| NUP43     | -1,94228 | 1,80E-11 |
| ABCB7     | -1,94343 | 3,40E-10 |
| NEK3      | -1,94439 | 1,35E-10 |

|           |          |          |
|-----------|----------|----------|
| HES6      | -1,945   | 2,52E-06 |
| ABLM1     | -1,94599 | 6,07E-13 |
| TFDP1     | -1,94721 | 1,11E-18 |
| SLC25A12  | -1,95144 | 1,04E-07 |
| MORC4     | -1,95339 | 3,21E-13 |
| CD83      | -1,95657 | 4,93E-06 |
| TMEM181   | -1,95765 | 3,03E-09 |
| LGR4      | -1,9648  | 9,10E-07 |
| CHD9      | -1,96496 | 1,78E-11 |
| PDE12     | -1,96586 | 1,66E-15 |
| CRLF3     | -1,96736 | 1,63E-07 |
| MDN1      | -1,97038 | 4,06E-14 |
| GCLM      | -1,97047 | 4,95E-07 |
| EHBP1     | -1,97647 | 3,41E-14 |
| ATAD5     | -1,97837 | 3,34E-07 |
| THRA      | -1,97857 | 5,34E-06 |
| ARFGAP3   | -1,98199 | 1,63E-08 |
| FAM73A    | -1,98483 | 2,78E-08 |
| KLHL15    | -1,98491 | 2,37E-06 |
| LASP1     | -1,98515 | 3,30E-08 |
| XPNPEP1   | -1,9866  | 4,61E-13 |
| GALE      | -1,98706 | 6,65E-09 |
| OAT       | -1,99199 | 4,66E-06 |
| NDFIP2    | -1,9927  | 7,54E-12 |
| TGDS      | -1,99336 | 0,000516 |
| NIPAL3    | -1,99394 | 5,39E-06 |
| FABP5     | -1,99806 | 8,77E-18 |
| AKAP17A   | -1,99866 | 2,28E-09 |
| MAP1B     | -1,99942 | 3,07E-05 |
| MYCBP2    | -1,99952 | 4,10E-14 |
| LRIG1     | -2,00043 | 1,22E-11 |
| SYNJ1     | -2,0029  | 1,59E-06 |
| TRPM2     | -2,00379 | 5,73E-11 |
| TMSB4X    | -2,00821 | 1,44E-13 |
| COL9A3    | -2,01185 | 2,27E-06 |
| BIK       | -2,01573 | 2,06E-05 |
| ECHDC1    | -2,01854 | 6,88E-11 |
| OAF       | -2,01925 | 7,04E-06 |
| TNS3      | -2,02068 | 5,98E-08 |
| GLYCTK    | -2,02437 | 0,000368 |
| BMP2K     | -2,02663 | 7,08E-14 |
| CD46      | -2,02721 | 1,39E-09 |
| DFFB      | -2,02747 | 4,01E-06 |
| NRCAM     | -2,02792 | 2,43E-08 |
| CPOX      | -2,03953 | 2,33E-06 |
| PARP12    | -2,04172 | 0,000143 |
| NUP50-AS1 | -2,04186 | 1,05E-05 |
| NMI       | -2,04512 | 4,34E-06 |
| AHI1      | -2,04698 | 7,70E-09 |
| ENDOD1    | -2,05186 | 2,75E-15 |

|           |          |          |
|-----------|----------|----------|
| CDC14B    | -2,05191 | 1,58E-10 |
| SPIN4     | -2,05266 | 6,17E-06 |
| SPRYD7    | -2,0577  | 4,95E-10 |
| MED14     | -2,0602  | 4,70E-19 |
| DLG4      | -2,06437 | 0,000166 |
| MICAL1    | -2,06484 | 9,38E-06 |
| TMX3      | -2,06688 | 1,94E-10 |
| ZNF589    | -2,06995 | 1,05E-06 |
| KRT23     | -2,07157 | 0,000239 |
| NFKB2     | -2,07262 | 2,88E-13 |
| COBL      | -2,07435 | 6,97E-09 |
| DGKD      | -2,08007 | 2,94E-12 |
| SQRDL     | -2,08158 | 6,41E-05 |
| RAB11FIP1 | -2,0855  | 1,20E-18 |
| POLR3G    | -2,09206 | 1,54E-07 |
| FBXO10    | -2,09354 | 6,83E-09 |
| POLM      | -2,09806 | 1,48E-10 |
| NCOA7     | -2,09814 | 1,94E-13 |
| ATP6AP1L  | -2,10173 | 0,000957 |
| PLEKHB1   | -2,10331 | 0,000137 |
| UBASH3B   | -2,10484 | 0,000598 |
| CPNE7     | -2,10573 | 4,02E-05 |
| SUSD1     | -2,11439 | 2,30E-08 |
| PAOX      | -2,11457 | 0,000961 |
| FAF1      | -2,11552 | 1,23E-08 |
| SH2D4A    | -2,11716 | 1,46E-14 |
| RNF170    | -2,11993 | 4,66E-09 |
| PORCN     | -2,12058 | 1,11E-05 |
| SEL1L3    | -2,12382 | 2,44E-13 |
| AHSA2     | -2,12502 | 0,000291 |
| KLF4      | -2,13097 | 5,11E-13 |
| CLIP2     | -2,13583 | 5,40E-13 |
| POMK      | -2,13585 | 7,18E-06 |
| DCP1A     | -2,13942 | 3,23E-11 |
| KLF3      | -2,14623 | 7,65E-12 |
| PLS1      | -2,15079 | 1,11E-14 |
| RAPGEF5   | -2,15175 | 0,00012  |
| PAM       | -2,15278 | 5,55E-16 |
| FAHD2B    | -2,15655 | 0,000329 |
| INSR      | -2,15707 | 5,67E-09 |
| SH3RF1    | -2,159   | 1,17E-07 |
| CEP72     | -2,1594  | 9,36E-06 |
| ZAK       | -2,15983 | 4,61E-18 |
| ADAM9     | -2,16733 | 2,39E-10 |
| ADAMTSL5  | -2,16745 | 1,21E-06 |
| MAFG      | -2,16754 | 1,02E-17 |
| SMCO4     | -2,16904 | 0,000393 |
| TARBP1    | -2,17078 | 7,03E-10 |
| PAK1      | -2,17323 | 2,50E-09 |
| MICAL2    | -2,17589 | 4,38E-12 |

|           |          |          |
|-----------|----------|----------|
| OPTN      | -2,1786  | 0,000181 |
| TERT      | -2,19099 | 0,00049  |
| PPFIBP2   | -2,19513 | 1,17E-14 |
| TXLNA     | -2,19544 | 5,91E-16 |
| ABCB10    | -2,196   | 5,72E-12 |
| RELB      | -2,20392 | 3,61E-07 |
| CDC25A    | -2,20474 | 2,01E-15 |
| LINC01123 | -2,20877 | 3,14E-09 |
| CDCA7     | -2,21088 | 5,46E-07 |
| FNDC3A    | -2,21369 | 9,79E-16 |
| ACO1      | -2,21797 | 1,04E-08 |
| CASP3     | -2,23035 | 1,37E-11 |
| RASL10B   | -2,2364  | 4,59E-05 |
| MAPK8IP3  | -2,24472 | 0,000789 |
| DUSP7     | -2,24621 | 2,51E-07 |
| C15orf41  | -2,24689 | 7,47E-07 |
| COTL1     | -2,24864 | 1,84E-13 |
| SHPRH     | -2,24972 | 2,46E-07 |
| KCNJ14    | -2,25007 | 1,36E-06 |
| HAS3      | -2,25263 | 1,04E-05 |
| CEP85     | -2,25474 | 5,61E-09 |
| YAP1      | -2,26039 | 5,63E-20 |
| STK31     | -2,26189 | 0,000201 |
| EXTL2     | -2,27259 | 2,77E-07 |
| PRR5L     | -2,27534 | 0,000194 |
| LMO7      | -2,27608 | 1,56E-14 |
| TWISTNB   | -2,27611 | 2,18E-19 |
| CALML4    | -2,28086 | 8,37E-13 |
| MFI2      | -2,28237 | 6,94E-15 |
| SRXN1     | -2,28489 | 7,88E-09 |
| EPHX1     | -2,28738 | 3,12E-07 |
| PERP      | -2,29126 | 6,04E-11 |
| ARHGAP32  | -2,29718 | 1,71E-13 |
| ARPIN     | -2,2982  | 3,75E-07 |
| TBC1D4    | -2,30026 | 1,54E-07 |
| PRKCE     | -2,30401 | 4,98E-05 |
| GPR180    | -2,30447 | 5,78E-13 |
| TGFA      | -2,30586 | 1,48E-07 |
| DCBLD1    | -2,31237 | 1,81E-09 |
| MIR22HG   | -2,31262 | 8,05E-05 |
| CAPN10    | -2,31373 | 3,22E-08 |
| KCNK5     | -2,31572 | 2,12E-05 |
| PRNP      | -2,32698 | 2,68E-14 |
| LINC01128 | -2,33319 | 1,37E-08 |
| SELM      | -2,33832 | 1,70E-06 |
| KIAA1551  | -2,34497 | 2,85E-19 |
| ME2       | -2,35114 | 4,65E-20 |
| NDNF      | -2,35528 | 9,75E-05 |
| SFXN3     | -2,35644 | 2,63E-10 |
| RASSF3    | -2,35924 | 9,42E-16 |

|           |          |          |
|-----------|----------|----------|
| LAMA3     | -2,36601 | 6,83E-15 |
| HOOK3     | -2,37146 | 2,93E-13 |
| OTUB2     | -2,37327 | 2,26E-05 |
| SIPA1     | -2,37409 | 3,02E-08 |
| PAQR3     | -2,37617 | 6,43E-15 |
| CORO2A    | -2,37801 | 4,36E-07 |
| LOC284023 | -2,38057 | 7,72E-08 |
| DSG2      | -2,38345 | 9,41E-26 |
| GANC      | -2,38403 | 3,26E-10 |
| PPARA     | -2,38765 | 5,00E-12 |
| PLCXD1    | -2,39594 | 4,84E-10 |
| SLCO4A1   | -2,40914 | 1,31E-10 |
| DMKN      | -2,40968 | 6,20E-19 |
| ARHGAP26  | -2,40993 | 9,38E-06 |
| ALAS1     | -2,41326 | 5,93E-17 |
| LIME1     | -2,41386 | 0,000964 |
| RAMP1     | -2,41562 | 2,29E-06 |
| ALS2CL    | -2,41901 | 0,000387 |
| NHSL1     | -2,42028 | 1,90E-12 |
| FAM101B   | -2,42416 | 1,57E-08 |
| B4GALT6   | -2,42471 | 4,23E-09 |
| CNTLN     | -2,43002 | 1,75E-09 |
| BACH1     | -2,43241 | 1,24E-16 |
| GHDC      | -2,43479 | 3,26E-11 |
| SLC16A3   | -2,43686 | 6,11E-07 |
| SAMHD1    | -2,43908 | 3,28E-07 |
| LHX6      | -2,43928 | 3,66E-05 |
| UGDH      | -2,44066 | 6,63E-18 |
| PCSK9     | -2,44079 | 0,000389 |
| DIAPH2    | -2,44113 | 3,55E-12 |
| TRIM2     | -2,44716 | 4,87E-17 |
| PHLDA1    | -2,4507  | 3,74E-08 |
| PPAP2C    | -2,45194 | 1,91E-21 |
| CARD10    | -2,45342 | 5,03E-12 |
| RP2       | -2,45592 | 8,01E-10 |
| PRRG1     | -2,45655 | 1,10E-05 |
| FLVCR1    | -2,45854 | 5,68E-13 |
| ABHD2     | -2,46416 | 2,41E-15 |
| RILPL2    | -2,46517 | 2,98E-05 |
| SYNM      | -2,47141 | 3,31E-07 |
| PEX6      | -2,47143 | 5,61E-07 |
| TNFRSF10A | -2,474   | 1,93E-13 |
| TMPRSS2   | -2,47429 | 7,83E-10 |
| SMIM3     | -2,47965 | 3,51E-16 |
| MYB       | -2,49064 | 2,16E-13 |
| FXYD5     | -2,50201 | 1,34E-17 |
| ZNF292    | -2,50777 | 8,29E-25 |
| MUC3A     | -2,5084  | 1,79E-08 |
| MOCOS     | -2,51222 | 1,01E-09 |
| TFR2      | -2,52641 | 4,57E-12 |

|           |          |          |
|-----------|----------|----------|
| LBR       | -2,5278  | 1,30E-18 |
| AGMAT     | -2,53504 | 6,98E-17 |
| KCNMB4    | -2,53507 | 1,08E-07 |
| LNP1      | -2,53738 | 0,000588 |
| TMC7      | -2,53789 | 2,75E-10 |
| RALGAPA2  | -2,54038 | 3,41E-22 |
| FBLIM1    | -2,54223 | 1,59E-11 |
| HSD17B12  | -2,54605 | 1,22E-26 |
| FAM89A    | -2,55067 | 9,12E-06 |
| CBLC      | -2,55128 | 8,60E-13 |
| B4GALT5   | -2,55295 | 1,18E-26 |
| KIAA1804  | -2,55744 | 1,36E-09 |
| UAP1L1    | -2,55954 | 5,07E-16 |
| C1orf106  | -2,56215 | 3,00E-09 |
| DTX4      | -2,56536 | 1,85E-17 |
| STS       | -2,56735 | 1,06E-12 |
| GNAL      | -2,57404 | 3,76E-05 |
| RDH10     | -2,5776  | 5,91E-13 |
| PRDM5     | -2,5867  | 7,31E-05 |
| ZIC5      | -2,5959  | 0,000469 |
| KLHL17    | -2,59688 | 1,36E-06 |
| INAFM2    | -2,59793 | 4,70E-10 |
| ARAP2     | -2,60017 | 8,27E-15 |
| IFIT5     | -2,60104 | 7,50E-08 |
| DDX60L    | -2,6023  | 0,000205 |
| SH2D2A    | -2,60416 | 2,00E-07 |
| MCF2L-AS1 | -2,60562 | 3,32E-05 |
| C1orf116  | -2,61591 | 3,99E-08 |
| ISG20     | -2,61639 | 1,29E-08 |
| SLC12A2   | -2,62026 | 6,44E-34 |
| UPP1      | -2,62081 | 3,01E-05 |
| RAB11FIP5 | -2,62337 | 4,78E-08 |
| HPDL      | -2,63195 | 5,27E-20 |
| SLC12A7   | -2,63603 | 5,39E-25 |
| MB21D1    | -2,6371  | 4,12E-11 |
| SERAC1    | -2,64857 | 9,11E-13 |
| PIP5K1B   | -2,65181 | 1,20E-07 |
| FLNB      | -2,65217 | 5,75E-18 |
| HHEX      | -2,6535  | 1,47E-05 |
| IGF2BP2   | -2,65524 | 6,03E-21 |
| FSTL3     | -2,65857 | 8,47E-12 |
| SNHG4     | -2,662   | 2,37E-16 |
| ARHGEF38  | -2,6621  | 2,82E-06 |
| ABHD6     | -2,66211 | 8,24E-10 |
| CEACAM5   | -2,66354 | 0,000695 |
| ECE1      | -2,68543 | 5,55E-24 |
| TAGLN     | -2,68549 | 0,000458 |
| TBC1D8B   | -2,6888  | 7,45E-06 |
| SSFA2     | -2,69382 | 3,84E-24 |
| DNAJC3    | -2,69915 | 1,00E-17 |



|           |          |          |
|-----------|----------|----------|
| TAPBPL    | -2,70159 | 0,000324 |
| GJB2      | -2,70723 | 3,81E-15 |
| ABCA7     | -2,71178 | 1,36E-12 |
| LIPH      | -2,71386 | 0,000342 |
| VGF       | -2,7178  | 1,98E-13 |
| RBMS2     | -2,7195  | 2,76E-13 |
| LOC171391 | -2,725   | 0,000358 |
| NEDD4L    | -2,72543 | 7,62E-19 |
| GNPDA2    | -2,73327 | 6,04E-11 |
| CARNMT1   | -2,73519 | 2,04E-19 |
| ARNTL2    | -2,7422  | 6,50E-14 |
| KIAA1671  | -2,74377 | 2,68E-28 |
| S100A6    | -2,75583 | 1,17E-16 |
| SLC17A5   | -2,75846 | 8,93E-11 |
| MET       | -2,76636 | 5,88E-39 |
| SLC6A8    | -2,76649 | 2,81E-12 |
| PLEKHA4   | -2,76714 | 0,000144 |
| HBEGF     | -2,77097 | 2,81E-10 |
| ANO9      | -2,77389 | 6,72E-06 |
| PTK6      | -2,77471 | 1,01E-16 |
| SYK       | -2,77668 | 5,49E-15 |
| IL4R      | -2,77819 | 2,14E-10 |
| FGFRL1    | -2,79002 | 6,60E-17 |
| ALDH1A3   | -2,80187 | 5,52E-05 |
| RPLP0P2   | -2,80312 | 6,38E-05 |
| TNFSF9    | -2,80601 | 4,02E-05 |
| CTH       | -2,80836 | 1,82E-10 |
| HYAL3     | -2,81269 | 1,14E-05 |
| LOC100288 | -2,81553 | 1,22E-09 |
| SLC12A4   | -2,82114 | 1,47E-05 |
| SERPINI1  | -2,82276 | 2,22E-08 |
| HNMT      | -2,82416 | 0,00016  |
| DNAJC3-AS | -2,82417 | 0,00023  |
| DAGLA     | -2,82748 | 4,09E-12 |
| TMC5      | -2,82918 | 9,30E-21 |
| SLC35G1   | -2,82969 | 2,00E-09 |
| TMEM106f  | -2,82979 | 9,48E-29 |
| BAAT      | -2,8439  | 0,000327 |
| NSMF      | -2,84555 | 6,79E-28 |
| TREX1     | -2,84925 | 4,87E-12 |
| LBX2-AS1  | -2,85057 | 3,14E-06 |
| FRK       | -2,85201 | 8,05E-05 |
| MXD1      | -2,86851 | 4,57E-19 |
| FN3K      | -2,87077 | 6,17E-07 |
| CHIC1     | -2,8741  | 4,25E-10 |
| RBM26-AS1 | -2,88228 | 0,000482 |
| HLA-C     | -2,88348 | 1,28E-07 |
| FBXO2     | -2,8921  | 1,23E-06 |
| CD27-AS1  | -2,90616 | 0,000773 |
| SOCS6     | -2,9083  | 4,48E-28 |

|          |          |          |
|----------|----------|----------|
| ERVK13-1 | -2,91553 | 1,44E-06 |
| HLA-F    | -2,92272 | 4,01E-06 |
| CHRNA1   | -2,92299 | 7,85E-12 |
| TRIP10   | -2,92477 | 8,96E-18 |
| NMNAT3   | -2,93135 | 3,79E-07 |
| SPRY1    | -2,93324 | 7,08E-07 |
| B3GNT3   | -2,93606 | 2,26E-09 |
| PRKAR2A  | -2,93628 | 7,62E-19 |
| TTC38    | -2,93752 | 5,73E-18 |
| EFNB1    | -2,93778 | 3,55E-24 |
| HIC2     | -2,94162 | 1,40E-16 |
| FAM135A  | -2,94357 | 6,03E-14 |
| GPC1     | -2,94503 | 5,12E-12 |
| TMEM80   | -2,94886 | 7,31E-20 |
| EPHB2    | -2,95632 | 9,55E-20 |
| MIRLET7B | -2,95785 | 0,000384 |
| METTL7B  | -2,96983 | 1,51E-14 |
| RAB20    | -2,97298 | 3,43E-09 |
| PM20D2   | -2,97351 | 2,04E-18 |
| NUPL2    | -2,9764  | 2,15E-09 |
| SLC2A1   | -2,97656 | 1,05E-14 |
| ANKMY2   | -2,98214 | 6,24E-22 |
| GRK5     | -2,98869 | 1,81E-09 |
| ZBTB47   | -2,99448 | 6,78E-06 |
| BTN3A3   | -2,99861 | 0,000934 |
| CENPV    | -3,00098 | 2,53E-11 |
| GPR63    | -3,00725 | 6,52E-08 |
| PTPRG    | -3,0181  | 1,36E-30 |
| ATP11A   | -3,02183 | 2,65E-28 |
| DACH1    | -3,02648 | 6,43E-14 |
| POLR2J2  | -3,02871 | 0,001002 |
| PITX2    | -3,02972 | 7,00E-08 |
| TYMP     | -3,03309 | 8,19E-10 |
| NAPRT    | -3,03754 | 1,48E-16 |
| CHM      | -3,04147 | 1,12E-11 |
| NKPD1    | -3,0418  | 0,000194 |
| C19orf66 | -3,05349 | 2,14E-05 |
| SH3BGR2  | -3,06048 | 1,18E-12 |
| S100A4   | -3,06163 | 4,27E-15 |
| STX3     | -3,07778 | 3,06E-22 |
| MGAT5    | -3,07865 | 7,39E-23 |
| PRSS22   | -3,08277 | 1,54E-12 |
| ANK2     | -3,08815 | 3,12E-07 |
| CLCN4    | -3,09099 | 1,36E-06 |
| CCDC82   | -3,10004 | 4,05E-11 |
| SH2B3    | -3,10477 | 8,01E-23 |
| MAPRE2   | -3,11059 | 7,11E-15 |
| GPAT3    | -3,11316 | 1,39E-11 |
| TRAF5    | -3,1168  | 2,55E-19 |
| TRPV1    | -3,11981 | 0,000358 |

|           |          |          |
|-----------|----------|----------|
| TIAM1     | -3,12543 | 3,76E-21 |
| SH2D5     | -3,1273  | 3,79E-09 |
| SETDB2    | -3,12962 | 1,47E-18 |
| AHNAK2    | -3,13714 | 7,59E-23 |
| L3MBTL3   | -3,16094 | 9,58E-15 |
| ADGRE5    | -3,16871 | 3,29E-18 |
| PLEKHA2   | -3,17433 | 2,83E-19 |
| PPARG     | -3,17515 | 1,49E-13 |
| WLS       | -3,17675 | 1,89E-19 |
| NOTUM     | -3,17869 | 1,40E-17 |
| SLC22A15  | -3,18037 | 0,000181 |
| FAM46A    | -3,18457 | 8,75E-14 |
| ARHGEF10  | -3,18607 | 3,56E-18 |
| HNRNPU-A  | -3,18717 | 1,44E-05 |
| MCF2L     | -3,19017 | 1,00E-21 |
| PCDHGA10  | -3,19042 | 3,27E-09 |
| SNX7      | -3,19519 | 7,12E-13 |
| CA2       | -3,20364 | 0,000734 |
| KIF13B    | -3,21511 | 7,16E-12 |
| DDAH1     | -3,22411 | 2,01E-19 |
| SERINC2   | -3,24938 | 1,62E-17 |
| RTTN      | -3,27124 | 3,08E-18 |
| FAT1      | -3,28295 | 2,92E-24 |
| CLDN15    | -3,29096 | 2,39E-14 |
| EGLN3     | -3,29342 | 2,34E-14 |
| MYRFL     | -3,31646 | 2,00E-05 |
| XK        | -3,32454 | 1,86E-20 |
| LINC-PINT | -3,33162 | 6,81E-05 |
| CYP4F3    | -3,34755 | 0,00021  |
| PTPRE     | -3,36931 | 6,50E-07 |
| LOC730102 | -3,37336 | 7,46E-07 |
| CAMK2D    | -3,38234 | 3,53E-33 |
| LPCAT2    | -3,39085 | 2,78E-22 |
| GNAI1     | -3,39293 | 5,55E-13 |
| DNAJB4    | -3,39478 | 7,02E-11 |
| TNFAIP2   | -3,40044 | 0,000167 |
| SPRY2     | -3,40479 | 1,45E-15 |
| A4GALT    | -3,40921 | 1,22E-09 |
| KBTBD11   | -3,41808 | 3,39E-15 |
| SASH1     | -3,41873 | 7,08E-14 |
| DPY19L2P2 | -3,42751 | 1,45E-06 |
| AREG      | -3,43312 | 5,00E-18 |
| HOXC8     | -3,43524 | 0,000266 |
| CEMIP     | -3,44049 | 9,97E-23 |
| TRMT11    | -3,46795 | 7,22E-14 |
| SOX15     | -3,47039 | 8,63E-05 |
| TMEM51-A  | -3,47683 | 0,000335 |
| STEAP1    | -3,47921 | 2,26E-10 |
| TRNP1     | -3,4838  | 1,45E-20 |
| IL6R      | -3,49058 | 1,18E-06 |

|           |          |          |
|-----------|----------|----------|
| FHL2      | -3,492   | 1,17E-07 |
| TPPP      | -3,49344 | 4,61E-15 |
| FERMT1    | -3,49851 | 9,98E-46 |
| ZNF469    | -3,51299 | 4,04E-06 |
| LINC01232 | -3,51393 | 3,33E-05 |
| TNNI3     | -3,5211  | 5,39E-12 |
| RIN2      | -3,52731 | 5,48E-15 |
| NLRP6     | -3,52958 | 0,000551 |
| GRIN2D    | -3,54953 | 3,77E-18 |
| DPYSL3    | -3,54992 | 6,13E-08 |
| SIK1      | -3,55755 | 0,000243 |
| SH3RF2    | -3,55805 | 9,86E-12 |
| MAN1A1    | -3,56221 | 7,75E-39 |
| PLIN2     | -3,56441 | 8,03E-24 |
| SEPT10    | -3,57033 | 9,96E-16 |
| ELFN1     | -3,57638 | 1,45E-11 |
| ERVMER34  | -3,59651 | 1,45E-21 |
| CMPK2     | -3,60457 | 0,000178 |
| DLGAP1-AS | -3,60683 | 5,33E-08 |
| SHH       | -3,60713 | 3,00E-18 |
| AATK      | -3,61045 | 0,000102 |
| KBTBD8    | -3,61389 | 3,52E-10 |
| WDR90     | -3,61719 | 8,69E-09 |
| EVA1C     | -3,62249 | 1,76E-12 |
| MX2       | -3,62689 | 1,15E-05 |
| PLEK2     | -3,62831 | 4,42E-40 |
| ULBP3     | -3,62972 | 2,69E-07 |
| ST6GALNA4 | -3,6353  | 1,37E-17 |
| MYO15B    | -3,63952 | 3,26E-23 |
| PYGL      | -3,64449 | 8,64E-07 |
| PSMB9     | -3,65302 | 1,17E-08 |
| FNIP2     | -3,65865 | 6,38E-13 |
| ACOT11    | -3,65914 | 3,01E-09 |
| C14orf159 | -3,65919 | 3,77E-17 |
| HDAC4     | -3,66935 | 1,62E-10 |
| SEMA3B    | -3,6809  | 1,56E-19 |
| FRRS1     | -3,69361 | 1,68E-11 |
| PTGR1     | -3,71369 | 5,47E-24 |
| SORBS2    | -3,72124 | 8,87E-06 |
| PLA2G4A   | -3,73021 | 0,000319 |
| ARHGAP23  | -3,73074 | 3,41E-12 |
| CPXM2     | -3,73583 | 9,06E-09 |
| CYP4V2    | -3,75116 | 1,73E-10 |
| CXorf57   | -3,75454 | 1,37E-12 |
| C16orf62  | -3,75624 | 6,72E-36 |
| LINC01315 | -3,76858 | 1,51E-05 |
| NTSR1     | -3,78552 | 0,00072  |
| EGF       | -3,79049 | 0,000625 |
| KCNAB2    | -3,7985  | 1,98E-16 |
| STAMBPL1  | -3,80038 | 1,92E-11 |

|           |          |          |
|-----------|----------|----------|
| SLC52A3   | -3,80153 | 9,30E-16 |
| PHLDA2    | -3,80508 | 1,48E-16 |
| TNFAIP3   | -3,8132  | 2,92E-14 |
| SP100     | -3,81376 | 5,76E-06 |
| CIB2      | -3,82094 | 1,75E-06 |
| EFNB2     | -3,82165 | 3,00E-47 |
| FAM131B   | -3,82239 | 0,000909 |
| HTR1D     | -3,82738 | 9,35E-12 |
| CREG2     | -3,82776 | 8,20E-05 |
| MAFF      | -3,85776 | 0,000549 |
| BTN3A2    | -3,86376 | 9,20E-10 |
| GLS       | -3,86476 | 6,65E-55 |
| HSD17B11  | -3,86643 | 3,01E-20 |
| SNAI1     | -3,895   | 7,52E-21 |
| CYBB      | -3,89666 | 2,23E-06 |
| SOWAHC    | -3,89807 | 2,89E-30 |
| LGALS3    | -3,91201 | 1,40E-23 |
| C3orf52   | -3,91218 | 2,07E-06 |
| PPM1K     | -3,92464 | 2,67E-13 |
| C3orf80   | -3,92839 | 8,05E-06 |
| HERC5     | -3,93357 | 1,89E-06 |
| DCBLD2    | -3,93449 | 1,80E-46 |
| PTPRH     | -3,93992 | 1,84E-06 |
| LRRC56    | -3,95787 | 3,56E-21 |
| ASPH      | -3,96055 | 2,29E-41 |
| ATAD3B    | -3,96073 | 9,66E-26 |
| ABCC2     | -3,97519 | 4,46E-13 |
| PTCH1     | -3,97899 | 8,41E-36 |
| PROCR     | -3,98466 | 6,81E-09 |
| ADM       | -3,99772 | 2,43E-08 |
| TYW1B     | -3,99867 | 5,02E-11 |
| CMTM7     | -4,00069 | 7,87E-24 |
| BHLHA15   | -4,03507 | 2,46E-11 |
| CD68      | -4,03508 | 3,27E-14 |
| SERPINB5  | -4,04064 | 8,47E-09 |
| IGFBP3    | -4,04666 | 5,06E-13 |
| TGFBR2    | -4,05692 | 1,14E-40 |
| HOXA7     | -4,068   | 3,33E-07 |
| BDKRB2    | -4,06808 | 4,72E-06 |
| FCGRT     | -4,08131 | 8,10E-10 |
| ANO7      | -4,09223 | 3,00E-09 |
| SLC17A9   | -4,09702 | 8,34E-09 |
| RHOU      | -4,1008  | 1,33E-29 |
| UCHL1     | -4,10812 | 2,64E-08 |
| LRAT      | -4,11476 | 5,43E-14 |
| PLBD1     | -4,12771 | 4,76E-31 |
| ZNF513    | -4,14351 | 2,63E-10 |
| FRMD5     | -4,15675 | 7,39E-34 |
| TNFRSF11B | -4,16245 | 4,93E-16 |
| PELI1     | -4,1654  | 2,57E-25 |

|           |          |          |
|-----------|----------|----------|
| TCN2      | -4,16926 | 0,000697 |
| GJB3      | -4,18125 | 3,25E-15 |
| ETV4      | -4,18718 | 2,45E-08 |
| SH3TC2    | -4,19452 | 2,43E-08 |
| NELL2     | -4,1981  | 7,44E-24 |
| AKR1C2    | -4,20728 | 6,86E-15 |
| KHDRBS3   | -4,20998 | 3,98E-05 |
| ITGB8     | -4,21416 | 5,39E-05 |
| PLA2G16   | -4,22188 | 6,46E-21 |
| NES       | -4,22548 | 5,90E-30 |
| FOXO1     | -4,23054 | 1,13E-26 |
| LIF       | -4,23746 | 6,70E-12 |
| CREB3L1   | -4,24366 | 8,65E-08 |
| CDK6      | -4,26547 | 3,64E-18 |
| AIM1L     | -4,26622 | 2,72E-27 |
| ZBTB20    | -4,27141 | 0,000192 |
| ANTXR2    | -4,27646 | 8,87E-06 |
| SEMA3A    | -4,28951 | 1,72E-09 |
| SERPINE2  | -4,29707 | 2,54E-33 |
| MLLT11    | -4,30846 | 9,12E-25 |
| MAOA      | -4,30853 | 3,59E-05 |
| HTATSF1P2 | -4,32492 | 7,34E-23 |
| SPON1     | -4,32649 | 0,000756 |
| PRKCA     | -4,32964 | 4,32E-35 |
| PLTP      | -4,33981 | 1,24E-26 |
| ECM1      | -4,34286 | 1,26E-11 |
| DSEL      | -4,34877 | 1,37E-16 |
| TRIM47    | -4,36047 | 1,19E-39 |
| TUBAL3    | -4,3781  | 0,000333 |
| DACT1     | -4,37847 | 4,40E-07 |
| LRRK1     | -4,38512 | 1,74E-30 |
| ADORA2B   | -4,38617 | 2,10E-38 |
| C10orf54  | -4,40503 | 8,51E-05 |
| LCN2      | -4,41976 | 1,34E-14 |
| PLLP      | -4,42888 | 3,01E-12 |
| APOLD1    | -4,43194 | 6,64E-08 |
| ICAM1     | -4,43422 | 1,59E-21 |
| PARM1     | -4,44184 | 1,51E-19 |
| MBP       | -4,44925 | 1,66E-38 |
| CAPN12    | -4,45557 | 2,30E-10 |
| IGFBP6    | -4,46789 | 2,59E-15 |
| TMC8      | -4,4808  | 8,98E-11 |
| STAT5A    | -4,49078 | 3,62E-06 |
| PAK6      | -4,50039 | 1,14E-15 |
| FAM84A    | -4,50473 | 9,96E-21 |
| MSN       | -4,50734 | 5,17E-06 |
| SMPD3     | -4,52526 | 4,23E-12 |
| SATB1     | -4,53561 | 2,03E-05 |
| SLC16A7   | -4,54281 | 3,16E-12 |
| PLAUR     | -4,55589 | 1,70E-17 |

|           |          |           |
|-----------|----------|-----------|
| NRP2      | -4,56573 | 2,37E-16  |
| DCHS1     | -4,61099 | 1,97E-05  |
| BCL2L15   | -4,61398 | 4,62E-20  |
| SLC22A18A | -4,61702 | 6,68E-05  |
| ILDR2     | -4,62169 | 5,37E-05  |
| LUCAT1    | -4,628   | 6,79E-11  |
| ST3GAL2   | -4,65051 | 1,16E-32  |
| GULP1     | -4,6698  | 1,83E-39  |
| LZTS3     | -4,70025 | 1,80E-25  |
| XKR6      | -4,71876 | 1,23E-05  |
| CCNI2     | -4,74969 | 1,83E-25  |
| NAP1L5    | -4,782   | 3,91E-05  |
| STRIP2    | -4,79645 | 1,93E-19  |
| DUSP6     | -4,8047  | 1,73E-08  |
| B3GNT9    | -4,80669 | 1,73E-15  |
| MACC1     | -4,81503 | 7,67E-24  |
| CNTD2     | -4,82047 | 2,36E-14  |
| KCNQ1     | -4,83565 | 2,97E-28  |
| CRAT      | -4,84117 | 2,62E-23  |
| EPAS1     | -4,84175 | 6,89E-23  |
| HLA-A     | -4,84323 | 5,43E-73  |
| BMP4      | -4,84937 | 7,57E-42  |
| F3        | -4,89197 | 2,54E-39  |
| LOC101925 | -4,90218 | 0,000625  |
| GOLGA8B   | -4,92362 | 1,54E-08  |
| CRYBG3    | -4,93467 | 1,33E-25  |
| PRRT3-AS1 | -4,93718 | 0,000167  |
| TRIM38    | -4,93738 | 1,79E-05  |
| GSDMB     | -4,95041 | 4,34E-13  |
| HPGD      | -4,9755  | 2,50E-12  |
| HNF4G     | -4,98367 | 3,73E-17  |
| PMP22     | -4,98834 | 4,11E-31  |
| DUSP4     | -4,99372 | 6,33E-05  |
| NCR3LG1   | -5,00797 | 8,20E-33  |
| GATA4     | -5,01107 | 1,17E-13  |
| ELFN1-AS1 | -5,01427 | 5,48E-10  |
| HLA-B     | -5,02166 | 3,01E-26  |
| ANXA3     | -5,03106 | 1,58E-58  |
| HDAC9     | -5,0329  | 4,83E-08  |
| ANO1      | -5,03429 | 6,92E-07  |
| COL6A1    | -5,03609 | 7,07E-108 |
| BLACAT1   | -5,04202 | 9,10E-09  |
| EHF       | -5,0495  | 1,50E-59  |
| MPP1      | -5,05083 | 2,96E-17  |
| FAM83F    | -5,05092 | 4,49E-20  |
| PKDCC     | -5,05832 | 4,14E-13  |
| CAPN2     | -5,06569 | 2,13E-33  |
| EPHA2     | -5,08436 | 2,77E-46  |
| IL20RA    | -5,08595 | 3,30E-27  |
| FUT4      | -5,0991  | 6,50E-58  |

|           |          |          |
|-----------|----------|----------|
| ANKRD22   | -5,1103  | 1,48E-05 |
| SLPI      | -5,12056 | 1,00E-06 |
| EMP3      | -5,12469 | 1,03E-11 |
| C17orf51  | -5,13923 | 3,09E-34 |
| EEPD1     | -5,1466  | 1,06E-25 |
| MUC20     | -5,15736 | 9,13E-14 |
| EGFR      | -5,16004 | 1,16E-61 |
| GCNT2     | -5,16398 | 0,00067  |
| LOC100130 | -5,16523 | 5,02E-20 |
| RASGRF2   | -5,16944 | 1,51E-14 |
| HAPLN3    | -5,17193 | 3,21E-06 |
| PLCB2     | -5,17228 | 0,000251 |
| PTGS2     | -5,23179 | 7,59E-05 |
| CRIP1     | -5,23235 | 6,64E-31 |
| RIN1      | -5,23629 | 1,87E-37 |
| RAB32     | -5,25611 | 3,85E-32 |
| MYH15     | -5,25635 | 2,74E-08 |
| CADPS2    | -5,25985 | 7,81E-14 |
| TESC      | -5,26122 | 5,04E-41 |
| KLK1      | -5,26152 | 1,39E-13 |
| B3GNT5    | -5,27091 | 1,48E-16 |
| ADAP1     | -5,2864  | 6,48E-66 |
| NOXO1     | -5,29837 | 1,67E-17 |
| KIAA0226L | -5,304   | 1,14E-16 |
| GNB3      | -5,30739 | 5,55E-06 |
| PID1      | -5,31309 | 9,75E-05 |
| MYEOV     | -5,31788 | 1,63E-47 |
| CNTFR     | -5,32283 | 3,41E-15 |
| ITGB6     | -5,32289 | 2,49E-06 |
| SOX6      | -5,33055 | 1,98E-05 |
| HOXB4     | -5,33213 | 1,60E-05 |
| SEC16B    | -5,38382 | 0,000702 |
| EPB41L2   | -5,38394 | 6,68E-83 |
| ETV5      | -5,39707 | 2,48E-28 |
| DDN       | -5,44679 | 5,13E-37 |
| LOC100125 | -5,45137 | 3,74E-08 |
| LYN       | -5,45356 | 5,28E-36 |
| TRIM31    | -5,45558 | 2,10E-09 |
| IL22RA1   | -5,4567  | 4,84E-10 |
| MX1       | -5,46577 | 4,23E-18 |
| GAS6-AS1  | -5,47743 | 1,31E-10 |
| EMILIN2   | -5,48255 | 1,57E-29 |
| FAM222A-1 | -5,4891  | 2,34E-14 |
| TMEM173   | -5,50631 | 8,04E-08 |
| CALB2     | -5,5277  | 4,28E-31 |
| CSF1R     | -5,54088 | 1,29E-05 |
| ATG9B     | -5,54543 | 1,22E-11 |
| SPNS2     | -5,55258 | 5,53E-55 |
| SPRED1    | -5,55299 | 1,59E-44 |
| JAG1      | -5,55857 | 9,70E-96 |



|           |          |           |
|-----------|----------|-----------|
| TUBA4A    | -5,56822 | 9,72E-26  |
| MTAP      | -5,58537 | 3,41E-28  |
| CASP10    | -5,60949 | 1,16E-16  |
| PIK3AP1   | -5,62203 | 3,33E-23  |
| AOC1      | -5,63325 | 1,88E-08  |
| NAGS      | -5,63633 | 2,52E-23  |
| ARSJ      | -5,64015 | 3,83E-05  |
| CD22      | -5,64131 | 4,99E-07  |
| SLCO4A1-A | -5,64229 | 1,10E-05  |
| CLIP4     | -5,66174 | 1,28E-08  |
| SPTBN5    | -5,67004 | 8,25E-14  |
| GABRB2    | -5,71745 | 0,000437  |
| DENND1C   | -5,71794 | 6,83E-14  |
| TOR4A     | -5,73994 | 4,19E-88  |
| FOSL1     | -5,74299 | 4,20E-47  |
| MSLN      | -5,74469 | 2,13E-23  |
| TRIM29    | -5,76766 | 0,00016   |
| MEIS2     | -5,77576 | 4,68E-10  |
| ADAMTS2   | -5,81011 | 0,000247  |
| HOXB9     | -5,81024 | 2,45E-05  |
| SNPH      | -5,81837 | 9,78E-06  |
| PALD1     | -5,83864 | 2,40E-82  |
| GAL3ST2   | -5,85008 | 8,67E-09  |
| TM4SF1    | -5,85788 | 1,26E-72  |
| C6orf223  | -5,88348 | 2,48E-28  |
| GPX2      | -5,89315 | 0,00063   |
| VILL      | -5,90325 | 6,15E-06  |
| CHN2      | -5,90797 | 1,08E-09  |
| PEG10     | -5,91265 | 1,70E-06  |
| CEACAM6   | -5,9206  | 7,94E-24  |
| ULBP2     | -5,94199 | 5,07E-21  |
| WNT10A    | -5,94592 | 3,80E-16  |
| ZBTB18    | -5,9664  | 1,15E-24  |
| COL17A1   | -5,98474 | 0,000807  |
| ME3       | -6,01091 | 3,98E-21  |
| ACOT2     | -6,0205  | 5,87E-18  |
| TGFBI     | -6,04962 | 1,10E-26  |
| ANXA1     | -6,05079 | 2,24E-114 |
| ITGA6     | -6,06202 | 2,61E-103 |
| MCTP2     | -6,07549 | 4,05E-14  |
| TMEM150F  | -6,0908  | 5,40E-08  |
| KRT6A     | -6,22205 | 4,02E-05  |
| LAMC2     | -6,22361 | 5,79E-73  |
| NOS3      | -6,23221 | 4,55E-07  |
| LINC01133 | -6,25928 | 6,40E-07  |
| HAS2      | -6,27855 | 5,16E-10  |
| CASP4     | -6,29288 | 0,000474  |
| PNPLA3    | -6,29663 | 6,50E-07  |
| MOB3B     | -6,32513 | 2,80E-13  |
| DISP2     | -6,3281  | 1,49E-05  |

|           |          |          |
|-----------|----------|----------|
| YOD1      | -6,33302 | 8,00E-44 |
| ROBO1     | -6,34619 | 1,18E-36 |
| MST1R     | -6,34789 | 7,32E-44 |
| EPHA7     | -6,35563 | 3,20E-09 |
| P2RY1     | -6,35778 | 2,93E-05 |
| BIRC3     | -6,39938 | 1,98E-22 |
| DNM3      | -6,40486 | 2,33E-23 |
| COX6B2    | -6,45291 | 8,30E-06 |
| MYRF      | -6,47265 | 2,07E-05 |
| FUT3      | -6,4895  | 3,06E-47 |
| ADRA2A    | -6,52539 | 1,02E-22 |
| HOXB6     | -6,53411 | 4,48E-27 |
| GAS7      | -6,5418  | 3,46E-05 |
| SNORA52   | -6,54996 | 1,74E-05 |
| STEAP2    | -6,56205 | 2,41E-14 |
| PLBD1-AS1 | -6,5695  | 1,43E-08 |
| HMX3      | -6,57937 | 0,000947 |
| COL4A2    | -6,60131 | 1,36E-31 |
| ZC4H2     | -6,60212 | 1,41E-06 |
| AKR1C1    | -6,60835 | 3,27E-53 |
| APOL6     | -6,62744 | 1,30E-58 |
| BIN1      | -6,64859 | 3,74E-57 |
| PHLDB2    | -6,74097 | 3,15E-19 |
| PTPRB     | -6,7496  | 1,49E-33 |
| TRABD2A   | -6,76755 | 2,82E-05 |
| SYT8      | -6,79117 | 0,000417 |
| MID1      | -6,79592 | 7,97E-61 |
| NEK9      | -6,79651 | 9,63E-05 |
| INPP1     | -6,80721 | 2,07E-06 |
| EPSTI1    | -6,82305 | 3,85E-06 |
| TWIST1    | -6,86481 | 4,48E-09 |
| LINC01138 | -6,87492 | 3,45E-07 |
| ZNF717    | -6,8861  | 5,48E-07 |
| CA9       | -6,90869 | 4,43E-11 |
| TNS4      | -6,92837 | 6,62E-51 |
| C1QTNF1   | -6,95752 | 5,45E-17 |
| SPRY4     | -7,05008 | 2,08E-78 |
| TMEM74B   | -7,08837 | 0,000144 |
| PEAR1     | -7,09024 | 0,000695 |
| LAMB3     | -7,09684 | 1,63E-06 |
| LGALS9    | -7,11575 | 7,20E-37 |
| TBX20     | -7,12324 | 4,44E-16 |
| LINC00673 | -7,131   | 5,78E-05 |
| SMIM24    | -7,13207 | 0,000116 |
| HOXB3     | -7,15201 | 2,17E-10 |
| ETV1      | -7,20569 | 8,59E-05 |
| RIMBP2    | -7,37683 | 4,92E-05 |
| LGR5      | -7,39201 | 9,42E-20 |
| AKR7A3    | -7,39698 | 6,81E-09 |
| UGT1A10   | -7,3999  | 0,000942 |

|           |          |          |
|-----------|----------|----------|
| LANCL3    | -7,4005  | 0,000933 |
| IL32      | -7,41841 | 2,93E-08 |
| ZNF71     | -7,42002 | 6,49E-09 |
| TRIM15    | -7,42569 | 7,86E-37 |
| C14orf105 | -7,42861 | 0,00101  |
| ZNF502    | -7,43941 | 0,000865 |
| PCSK5     | -7,43979 | 1,65E-15 |
| PRDM1     | -7,45598 | 4,10E-09 |
| SSTR5     | -7,45939 | 0,000815 |
| HOXB-AS3  | -7,46681 | 0,000704 |
| LIPE      | -7,46769 | 3,56E-09 |
| PAX6      | -7,47959 | 0,000894 |
| GRAMD2    | -7,48843 | 0,00091  |
| LINC01322 | -7,50138 | 0,000871 |
| DGKG      | -7,50669 | 8,06E-09 |
| BHLHE41   | -7,50984 | 2,61E-05 |
| KCNH8     | -7,51664 | 9,16E-05 |
| HLA-H     | -7,51773 | 7,03E-09 |
| PRAP1     | -7,59283 | 2,25E-43 |
| DUSP5P1   | -7,59975 | 0,000921 |
| ZNF577    | -7,62086 | 0,000601 |
| SLC2A12   | -7,62358 | 1,74E-05 |
| DSG3      | -7,6259  | 0,000549 |
| PIWIL4    | -7,65428 | 3,01E-05 |
| AKR1C3    | -7,65464 | 5,74E-05 |
| RRN3P1    | -7,65941 | 0,000391 |
| RUNX3     | -7,6619  | 1,13E-15 |
| TIMP4     | -7,67701 | 1,41E-05 |
| C1RL      | -7,68396 | 6,42E-18 |
| CES4A     | -7,68883 | 0,000284 |
| LINC00520 | -7,7067  | 0,000312 |
| SKAP1     | -7,72333 | 0,000247 |
| PLAU      | -7,73348 | 0,000331 |
| PROC      | -7,7576  | 0,000255 |
| PDCD1     | -7,75959 | 0,000213 |
| TM4SF5    | -7,7611  | 0,000219 |
| ZNF69     | -7,77462 | 0,000194 |
| EREG      | -7,7809  | 2,36E-07 |
| NLRC5     | -7,79428 | 4,42E-70 |
| ANKLE1    | -7,8031  | 0,000435 |
| TMED6     | -7,81505 | 0,00028  |
| GALNT9    | -7,81601 | 0,000347 |
| TINAG     | -7,82413 | 0,000189 |
| LOC101927 | -7,84988 | 0,000138 |
| PRDM13    | -7,86073 | 0,000132 |
| NTRK2     | -7,86273 | 0,000431 |
| ZNF583    | -7,86914 | 0,00014  |
| PTPRR     | -7,8932  | 0,000117 |
| NEURL3    | -7,8934  | 0,000278 |
| SOX9      | -7,89385 | 7,70E-93 |

|           |          |          |
|-----------|----------|----------|
| AKR1B10   | -7,89469 | 8,23E-12 |
| DKFZp434J | -7,91512 | 0,000106 |
| FAM27B    | -7,91512 | 0,000106 |
| SLC44A4   | -7,91813 | 8,50E-19 |
| MGAT3     | -7,92066 | 1,08E-09 |
| RAET1L    | -7,9248  | 4,32E-06 |
| MYOM2     | -7,94291 | 0,000113 |
| SLC2A9    | -7,94816 | 9,18E-05 |
| C15orf52  | -7,95643 | 7,22E-06 |
| MYO1A     | -7,97008 | 9,78E-05 |
| BAIAP2L2  | -8,0161  | 5,90E-25 |
| SPNS3     | -8,01806 | 7,19E-05 |
| LRRC66    | -8,03065 | 6,81E-05 |
| ABHD12B   | -8,03108 | 6,11E-05 |
| TPRXL     | -8,03829 | 3,74E-22 |
| OSR1      | -8,03947 | 2,67E-06 |
| MALL      | -8,05409 | 3,40E-06 |
| C2orf70   | -8,07787 | 5,50E-05 |
| CTAGE15   | -8,08593 | 5,23E-05 |
| KRT20     | -8,08645 | 1,66E-43 |
| DNAH12    | -8,08769 | 7,49E-05 |
| GREM1     | -8,09231 | 5,50E-05 |
| LINC01356 | -8,0999  | 4,42E-05 |
| LPAR1     | -8,11248 | 0,000101 |
| HCP5      | -8,11822 | 7,56E-38 |
| ARHGAP6   | -8,13256 | 7,00E-05 |
| MDFIC     | -8,14911 | 2,49E-16 |
| C4BPB     | -8,16514 | 4,48E-05 |
| LINC00857 | -8,18096 | 1,30E-11 |
| LCAL1     | -8,18998 | 3,07E-15 |
| CARD6     | -8,19575 | 2,79E-05 |
| TM4SF20   | -8,20019 | 3,15E-05 |
| RNF128    | -8,20648 | 5,08E-05 |
| KLHL3     | -8,21239 | 2,82E-05 |
| ACOT1     | -8,21637 | 1,26E-06 |
| SCG2      | -8,24584 | 3,92E-05 |
| RRAD      | -8,2648  | 2,21E-05 |
| GJC2      | -8,27378 | 7,93E-12 |
| FAM27E3   | -8,27894 | 1,94E-05 |
| SOX1      | -8,283   | 2,87E-05 |
| EPHA1-AS1 | -8,28637 | 4,30E-05 |
| MT1A      | -8,29999 | 2,36E-05 |
| LINC01268 | -8,3001  | 2,28E-05 |
| SLC7A7    | -8,31436 | 1,42E-17 |
| NR0B2     | -8,31593 | 2,16E-05 |
| LINC00526 | -8,3246  | 1,50E-05 |
| CYB5R2    | -8,32564 | 1,77E-05 |
| VGLL3     | -8,33349 | 2,36E-05 |
| ZNF773    | -8,33509 | 1,39E-05 |
| SLC9A3    | -8,35277 | 0,00013  |

|           |          |          |
|-----------|----------|----------|
| SGCE      | -8,3539  | 1,27E-05 |
| CSMD3     | -8,36754 | 1,26E-05 |
| SLC22A3   | -8,38377 | 3,33E-05 |
| MYL9      | -8,42429 | 1,14E-05 |
| HNF4A     | -8,42684 | 1,41E-59 |
| SNHG18    | -8,42993 | 8,77E-06 |
| PLB1      | -8,43384 | 1,17E-05 |
| TNC       | -8,44545 | 2,35E-44 |
| PRSS12    | -8,44853 | 2,78E-18 |
| GAL3ST1   | -8,45544 | 1,01E-05 |
| NPR2      | -8,46067 | 9,97E-07 |
| TMEM246   | -8,48032 | 7,21E-06 |
| NT5E      | -8,50096 | 6,03E-06 |
| DLL3      | -8,50278 | 6,00E-06 |
| TM4SF4    | -8,5161  | 0,000459 |
| MT1G      | -8,52433 | 6,78E-06 |
| ZNF470    | -8,53251 | 6,42E-06 |
| TLDC2     | -8,54012 | 6,59E-06 |
| LHX5      | -8,54255 | 5,61E-06 |
| GALNT8    | -8,546   | 6,09E-06 |
| GBP3      | -8,54916 | 4,68E-07 |
| AASS      | -8,55362 | 4,63E-06 |
| A1CF      | -8,55625 | 4,57E-06 |
| CHST13    | -8,56116 | 4,42E-06 |
| CREB3L3   | -8,57003 | 7,01E-06 |
| GUCY2C    | -8,58368 | 5,78E-06 |
| SFTA2     | -8,58553 | 3,95E-06 |
| HBQ1      | -8,59293 | 4,64E-06 |
| CDA       | -8,60471 | 3,89E-06 |
| TMBIM1    | -8,61297 | 2,13E-77 |
| BATF2     | -8,62272 | 2,78E-18 |
| KLK10     | -8,62367 | 3,27E-25 |
| AMN       | -8,6242  | 2,55E-19 |
| LINC00431 | -8,63102 | 6,10E-06 |
| MMP7      | -8,67264 | 2,52E-06 |
| PDZK1IP1  | -8,69467 | 2,22E-06 |
| ZNF503-AS | -8,7122  | 2,12E-06 |
| ELAVL2    | -8,71846 | 2,05E-06 |
| ZNF518B   | -8,72587 | 2,99E-06 |
| LINC01559 | -8,72751 | 5,59E-06 |
| LOC10106C | -8,72878 | 1,89E-06 |
| LRRN4     | -8,74397 | 3,35E-06 |
| CDHR5     | -8,7449  | 1,72E-06 |
| OSBPL3    | -8,79375 | 3,50E-68 |
| ZNF320    | -8,81007 | 1,32E-06 |
| SPP1      | -8,81453 | 2,58E-05 |
| TFCP2     | -8,8181  | 4,84E-05 |
| LOC101925 | -8,82096 | 1,15E-06 |
| LINC00668 | -8,84372 | 1,01E-06 |
| REG1A     | -8,87158 | 7,16E-06 |

|           |          |           |
|-----------|----------|-----------|
| KLK12     | -8,88587 | 8,36E-07  |
| LONRF3    | -8,88872 | 1,64E-14  |
| HOXB8     | -8,89412 | 8,40E-27  |
| VSNL1     | -8,90186 | 1,00E-13  |
| LYZ       | -8,91601 | 2,58E-07  |
| P3H3      | -8,94113 | 3,73E-08  |
| HCN1      | -8,94663 | 6,06E-07  |
| DPP10     | -8,95143 | 9,51E-15  |
| CCL24     | -8,97766 | 7,38E-07  |
| EMP1      | -8,97885 | 7,07E-15  |
| ITGA1     | -8,97993 | 8,11E-08  |
| RASSF6    | -8,98142 | 1,63E-21  |
| LY75      | -8,987   | 4,96E-07  |
| DIO3      | -8,99229 | 5,96E-23  |
| GABRE     | -9,00214 | 2,98E-06  |
| ZNF175    | -9,0069  | 5,01E-07  |
| ACSL5     | -9,01237 | 8,52E-82  |
| GPR35     | -9,04203 | 8,92E-41  |
| CXCL3     | -9,06779 | 7,46E-08  |
| SLCO2B1   | -9,06794 | 3,01E-07  |
| CDKN2A    | -9,06871 | 5,38E-62  |
| C1RL-AS1  | -9,06938 | 2,74E-06  |
| PROM1     | -9,08231 | 4,42E-07  |
| NKX2-5    | -9,15232 | 3,15E-07  |
| HCG26     | -9,1557  | 2,16E-07  |
| C7orf31   | -9,15615 | 2,20E-07  |
| DMRTA2    | -9,19567 | 1,26E-08  |
| TRIM10    | -9,19981 | 1,64E-07  |
| GATA2-AS1 | -9,22479 | 1,07E-08  |
| PCDHA4    | -9,23838 | 1,52E-07  |
| CTS2      | -9,24178 | 3,78E-79  |
| GBGT1     | -9,24407 | 1,15E-07  |
| ALDH2     | -9,29847 | 3,92E-109 |
| CFTR      | -9,3181  | 2,69E-07  |
| UGT1A1    | -9,32289 | 7,68E-08  |
| FAM155A   | -9,32587 | 9,32E-08  |
| TNFRSF14  | -9,33669 | 3,48E-16  |
| SLC39A5   | -9,35148 | 1,07E-07  |
| DPP4      | -9,3749  | 6,14E-43  |
| DKK4      | -9,38465 | 5,95E-08  |
| DEPDC7    | -9,39259 | 5,08E-08  |
| THSD7A    | -9,42397 | 4,92E-08  |
| UGT8      | -9,43996 | 1,97E-06  |
| DSG4      | -9,44558 | 7,20E-08  |
| CXCL2     | -9,47846 | 1,89E-06  |
| MAP7D2    | -9,48274 | 2,86E-38  |
| TMEM200A  | -9,48902 | 2,93E-08  |
| ZNF506    | -9,49139 | 3,44E-08  |
| NPM2      | -9,49977 | 3,92E-08  |
| C1orf61   | -9,57609 | 2,41E-08  |

|           |          |           |
|-----------|----------|-----------|
| MOGAT3    | -9,57611 | 1,83E-08  |
| GRIN2B    | -9,59233 | 1,64E-08  |
| FGF19     | -9,59782 | 0,000121  |
| CNN3      | -9,60202 | 2,17E-09  |
| TCN1      | -9,61003 | 2,56E-08  |
| FOXQ1     | -9,68838 | 1,13E-11  |
| SFRP5     | -9,71913 | 3,54E-08  |
| GABRB3    | -9,72954 | 9,38E-10  |
| POU4F1    | -9,73676 | 9,07E-09  |
| SULT4A1   | -9,77483 | 8,09E-09  |
| HOXA10    | -9,80324 | 4,93E-09  |
| PDX1      | -9,81802 | 5,14E-09  |
| ISL1      | -9,83262 | 4,22E-09  |
| LOC389602 | -9,84416 | 4,23E-09  |
| TDO2      | -9,84485 | 5,30E-09  |
| KCNE3     | -9,85194 | 6,59E-10  |
| CCND2     | -9,85526 | 2,41E-137 |
| AGPS      | -9,86315 | 3,18E-57  |
| CALB1     | -9,94435 | 4,72E-10  |
| CD40      | -9,96295 | 2,12E-09  |
| SLC38A5   | -9,99038 | 7,96E-68  |
| LINC00941 | -9,99283 | 1,99E-09  |
| ONECUT3   | -10,0111 | 3,28E-09  |
| ATP10B    | -10,0278 | 5,34E-28  |
| WBP5      | -10,0544 | 1,49E-09  |
| GOS2      | -10,0587 | 1,19E-09  |
| SOX8      | -10,0591 | 4,09E-27  |
| ETS1      | -10,0902 | 1,07E-09  |
| GDA       | -10,0986 | 9,21E-10  |
| ADAMTSL2  | -10,1632 | 2,53E-09  |
| CACNA1E   | -10,1929 | 5,77E-10  |
| FAM71E1   | -10,2324 | 8,36E-10  |
| PSMB8     | -10,2455 | 8,88E-38  |
| IRF8      | -10,2786 | 5,16E-10  |
| LDHB      | -10,2914 | 0,000549  |
| TLR6      | -10,2943 | 3,02E-10  |
| SLC6A20   | -10,3178 | 4,76E-10  |
| C6orf15   | -10,3417 | 2,12E-09  |
| CXCL1     | -10,4069 | 9,15E-10  |
| CYP3A5    | -10,4133 | 3,34E-10  |
| TDRD12    | -10,4166 | 5,13E-21  |
| LOC100507 | -10,4253 | 1,93E-10  |
| TTC22     | -10,4288 | 1,40E-10  |
| MAP1LC3A  | -10,4662 | 1,12E-10  |
| CDKN1C    | -10,4823 | 1,95E-09  |
| C5orf42   | -10,4856 | 1,48E-10  |
| PADI1     | -10,5142 | 8,44E-11  |
| CLRN3     | -10,5223 | 8,07E-11  |
| REG3A     | -10,5306 | 1,54E-09  |
| TCEAL8    | -10,5639 | 7,07E-11  |

|           |          |           |
|-----------|----------|-----------|
| GJB1      | -10,573  | 5,17E-10  |
| ZNF300    | -10,5732 | 1,32E-10  |
| SBSPON    | -10,5801 | 9,02E-11  |
| HS3ST1    | -10,6001 | 2,56E-11  |
| HOXB5     | -10,6276 | 4,46E-11  |
| ZNF649    | -10,6497 | 3,94E-11  |
| CADPS     | -10,7057 | 3,47E-22  |
| GSPT2     | -10,7074 | 3,05E-11  |
| RAC2      | -10,7348 | 2,50E-11  |
| FRG1CP    | -10,7431 | 2,30E-11  |
| SLC5A1    | -10,8114 | 1,98E-11  |
| NUDT16P1  | -10,8842 | 1,30E-11  |
| HRH1      | -10,8993 | 1,22E-11  |
| ZNF215    | -10,901  | 1,52E-11  |
| SEMA5A    | -10,914  | 9,15E-12  |
| MYH4      | -10,9294 | 1,23E-11  |
| BCL11A    | -10,933  | 7,64E-12  |
| MYO7B     | -10,9387 | 8,00E-12  |
| LOC11511C | -10,9746 | 7,86E-12  |
| ANXA13    | -10,9805 | 5,82E-12  |
| IPW       | -10,9978 | 1,00E-11  |
| ANKS4B    | -11,0015 | 5,26E-12  |
| GIPC2     | -11,014  | 4,68E-12  |
| UCA1      | -11,0174 | 7,03E-44  |
| KLK6      | -11,0526 | 5,79E-45  |
| CYP2W1    | -11,074  | 9,79E-12  |
| ZC3HAV1L  | -11,1092 | 1,27E-11  |
| LGALS4    | -11,1148 | 4,16E-24  |
| CCAT1     | -11,1181 | 2,54E-12  |
| CDIP1     | -11,1571 | 4,84E-12  |
| ALDH1A1   | -11,1852 | 7,74E-65  |
| ZNF280B   | -11,2167 | 1,78E-12  |
| GSTP1     | -11,2361 | 1,70E-136 |
| ADGRG5    | -11,2691 | 1,05E-12  |
| CDH11     | -11,3121 | 1,13E-12  |
| MT1E      | -11,3247 | 1,01E-12  |
| KCNJ2     | -11,3492 | 8,37E-13  |
| TNFSF15   | -11,3685 | 2,20E-12  |
| HMGA2     | -11,4013 | 1,34E-13  |
| PHGR1     | -11,4116 | 1,31E-12  |
| MDFI      | -11,4126 | 4,49E-13  |
| TNFRSF10C | -11,4771 | 1,39E-12  |
| SGK2      | -11,5123 | 2,53E-13  |
| CA13      | -11,5508 | 1,36E-12  |
| KIRREL    | -11,6004 | 1,61E-13  |
| SDHAF3    | -11,6316 | 2,34E-13  |
| USH1C     | -11,7058 | 2,29E-14  |
| SLCO1B3   | -11,7381 | 4,34E-13  |
| DPEP1     | -11,767  | 6,84E-27  |
| C2CD2     | -11,8585 | 4,76E-14  |



|           |          |          |
|-----------|----------|----------|
| PVRL3     | -11,8805 | 3,09E-14 |
| FUT6      | -11,9421 | 1,94E-14 |
| CDX1      | -12,0106 | 1,26E-14 |
| LINC00667 | -12,0268 | 2,08E-14 |
| GNE       | -12,064  | 9,35E-15 |
| HKDC1     | -12,0803 | 1,37E-41 |
| TNFRSF1B  | -12,1107 | 1,79E-14 |
| PRSS3     | -12,1595 | 5,46E-15 |
| DPP10-AS1 | -12,2617 | 3,16E-15 |
| FGFBP1    | -12,3204 | 3,23E-15 |
| MMP1      | -12,3263 | 3,30E-14 |
| KLK11     | -12,3488 | 3,16E-15 |
| FOXA3     | -12,3767 | 1,80E-15 |
| PROX1     | -12,3802 | 1,76E-15 |
| HNF1A     | -12,3888 | 1,29E-15 |
| MGAM2     | -12,4117 | 1,27E-15 |
| PPP1R1B   | -12,4244 | 1,45E-15 |
| ZCCHC11   | -12,4642 | 8,44E-16 |
| GRAMD1B   | -12,5182 | 1,05E-15 |
| FUT2      | -12,5408 | 5,15E-16 |
| MYOM3     | -12,57   | 4,32E-16 |
| SSTR1     | -12,6904 | 1,02E-15 |
| HEPH      | -12,6905 | 2,66E-16 |
| SIGMAR1   | -12,7302 | 1,02E-31 |
| GCNT3     | -12,7503 | 1,53E-16 |
| EPS8L3    | -12,8443 | 8,14E-17 |
| PIWIL1    | -13,0069 | 3,48E-17 |
| GPA33     | -13,1721 | 1,37E-17 |
| CES1      | -13,2664 | 1,30E-17 |
| TSPAN8    | -13,4141 | 2,35E-18 |
| TINAGL1   | -13,5457 | 1,28E-18 |
| DDC       | -13,5966 | 9,30E-19 |
| IGF2BP3   | -13,6638 | 6,43E-19 |
| SAMD5     | -13,7191 | 3,96E-19 |
| GALNT5    | -13,7696 | 2,28E-19 |
| MUC17     | -13,7966 | 1,57E-18 |
| EMC10     | -13,8489 | 1,37E-19 |
| GPX1      | -14,2001 | 2,27E-20 |
| CLDN2     | -14,6936 | 5,15E-22 |
| CDH17     | -14,8429 | 1,94E-22 |
| XIST      | -14,8789 | 6,68E-10 |
| VIL1      | -15,1111 | 2,81E-23 |
| MUC13     | -15,3276 | 6,28E-24 |
| FLNC      | -16,1695 | 2,21E-26 |

## HCT15

| Gene      | log2FoldCh | FDR      |
|-----------|------------|----------|
| BMP7      | 16,08871   | 3,59E-26 |
| FREM2     | 15,46054   | 3,87E-24 |
| LDOC1     | 14,83828   | 6,13E-22 |
| TSPYL5    | 14,70998   | 7,20E-22 |
| FAM127B   | 14,51422   | 2,69E-21 |
| C3orf14   | 14,31005   | 1,67E-20 |
| STC1      | 14,25015   | 2,78E-20 |
| EFEMP1    | 14,01727   | 8,73E-20 |
| PPP2R2C   | 14,00795   | 7,87E-20 |
| ELOVL5    | 14,00236   | 7,89E-20 |
| ESR1      | 13,96691   | 1,24E-19 |
| FAM127A   | 13,79486   | 2,13E-18 |
| BNIP3     | 13,67158   | 8,23E-19 |
| GFRA1     | 13,63107   | 3,08E-18 |
| OBSL1     | 13,6066    | 2,92E-18 |
| ANTXR1    | 13,54043   | 1,64E-18 |
| TFF1      | 13,47215   | 3,11E-18 |
| S1PR3     | 13,4291    | 4,38E-11 |
| DSCAM-AS1 | 13,41322   | 8,68E-11 |
| HSPB8     | 13,19107   | 4,78E-17 |
| H2AFJ     | 13,16881   | 2,80E-17 |
| FAM127C   | 13,0751    | 3,43E-17 |
| PXDN      | 13,07411   | 4,88E-17 |
| MYEF2     | 13,03724   | 1,22E-16 |
| BASP1     | 13,03202   | 3,44E-09 |
| PCDHA6    | 13,00594   | 5,35E-17 |
| ZNF43     | 12,99129   | 5,32E-17 |
| VAV3      | 12,97832   | 6,68E-17 |
| ACSS3     | 12,86763   | 1,40E-17 |
| KCNG1     | 12,86512   | 9,23E-16 |
| IRX2      | 12,78701   | 2,23E-16 |
| BST2      | 12,77299   | 4,68E-08 |
| MAP7D3    | 12,70177   | 3,22E-16 |
| ZNF737    | 12,69345   | 2,11E-15 |
| SPDEF     | 12,6842    | 1,65E-15 |
| ALDH3B2   | 12,68083   | 3,16E-15 |
| HS6ST2    | 12,67379   | 9,63E-16 |
| DYNC1I1   | 12,66238   | 4,13E-16 |
| COLEC12   | 12,61011   | 4,23E-15 |
| ZNF595    | 12,6088    | 1,05E-15 |
| EMB       | 12,59489   | 6,32E-16 |
| KYNU      | 12,48043   | 5,49E-15 |
| CBS       | 12,46973   | 1,39E-15 |
| ANO6      | 12,45716   | 1,86E-15 |
| SPG20     | 12,44866   | 1,63E-15 |
| L1CAM     | 12,40309   | 6,19E-15 |
| PCDH18    | 12,39491   | 1,93E-08 |
| B4GALNT4  | 12,38271   | 6,77E-15 |

|           |          |          |
|-----------|----------|----------|
| PCDHA11   | 12,37883 | 3,92E-15 |
| ZNF22     | 12,30551 | 2,24E-14 |
| NRCAM     | 12,29366 | 1,24E-14 |
| RPL39L    | 12,28571 | 4,28E-15 |
| DLX5      | 12,27423 | 5,50E-15 |
| LIN7A     | 12,26351 | 8,47E-15 |
| C15orf59  | 12,2487  | 2,49E-14 |
| PCDHB3    | 12,2372  | 8,33E-15 |
| GALNT16   | 12,22578 | 1,50E-05 |
| PYCARD    | 12,18902 | 1,64E-14 |
| SLC1A2    | 12,18134 | 8,84E-15 |
| ADCY1     | 12,15314 | 1,26E-14 |
| ADGRB1    | 12,15092 | 9,63E-15 |
| C14orf132 | 12,13333 | 1,08E-14 |
| SCN4A     | 12,13316 | 3,29E-05 |
| FBXO17    | 12,1052  | 3,99E-14 |
| ZNF85     | 12,04229 | 1,83E-14 |
| ZNF829    | 12,0339  | 3,49E-14 |
| WNT5A     | 12,01504 | 4,77E-14 |
| FAM50B    | 12,00773 | 2,44E-14 |
| MTERF1    | 12,00101 | 2,79E-14 |
| ZIC1      | 11,97284 | 7,33E-14 |
| CRISPLD1  | 11,95601 | 1,77E-13 |
| BCAS1     | 11,91574 | 9,55E-05 |
| PCDHB8    | 11,91281 | 4,46E-14 |
| DTX3      | 11,89689 | 4,42E-14 |
| AR        | 11,85234 | 6,04E-14 |
| GUCY1A2   | 11,84118 | 7,17E-14 |
| GALNT14   | 11,82153 | 6,96E-14 |
| ZNF736    | 11,80418 | 8,71E-14 |
| MMP17     | 11,7645  | 9,78E-14 |
| PCDHGC3   | 11,72563 | 1,94E-13 |
| CHST15    | 11,72186 | 1,55E-14 |
| C5orf38   | 11,65494 | 3,42E-13 |
| SDC2      | 11,63741 | 2,18E-13 |
| KRBA1     | 11,60867 | 2,90E-13 |
| P2RY6     | 11,60332 | 0,000234 |
| MAP9      | 11,59992 | 4,03E-13 |
| ASCL4     | 11,59737 | 3,03E-13 |
| ZNF134    | 11,55249 | 4,41E-13 |
| SYT1      | 11,49205 | 9,23E-13 |
| TCEA2     | 11,4889  | 5,12E-13 |
| EFS       | 11,47244 | 6,78E-13 |
| CRMP1     | 11,46301 | 8,16E-13 |
| ZNF813    | 11,37073 | 1,47E-12 |
| GUCY1A3   | 11,35146 | 1,32E-12 |
| ZNF331    | 11,32069 | 7,64E-12 |
| PTPRO     | 11,30728 | 2,52E-12 |
| SUSD3     | 11,30037 | 1,97E-11 |
| LIFR      | 11,28903 | 4,09E-12 |

|          |          |          |
|----------|----------|----------|
| RIMS4    | 11,28752 | 8,31E-12 |
| PGR      | 11,27648 | 7,34E-11 |
| MIPOL1   | 11,26546 | 1,97E-12 |
| TUSC1    | 11,25237 | 2,09E-12 |
| FAM155B  | 11,23424 | 2,60E-12 |
| ZNF548   | 11,20858 | 3,37E-12 |
| SOX2     | 11,19864 | 2,88E-12 |
| RGMA     | 11,1934  | 4,60E-12 |
| MPDZ     | 11,16784 | 5,18E-12 |
| FGF12    | 11,16081 | 6,10E-12 |
| CRIP2    | 11,09976 | 1,21E-44 |
| ZNF512   | 11,09569 | 5,60E-12 |
| ZNF606   | 11,09051 | 1,07E-11 |
| CHST10   | 11,07506 | 2,09E-11 |
| LMX1B    | 11,06323 | 6,62E-12 |
| TSHZ3    | 11,04687 | 1,55E-10 |
| SLFN5    | 11,04478 | 8,53E-12 |
| SPESP1   | 11,01466 | 1,33E-11 |
| EVL      | 11,0054  | 3,05E-23 |
| OSMR     | 10,97983 | 2,58E-11 |
| ATP2A3   | 10,8654  | 1,70E-11 |
| CEACAM21 | 10,86124 | 2,30E-11 |
| DTNA     | 10,85915 | 3,37E-12 |
| TDRD5    | 10,84308 | 3,75E-11 |
| CHGA     | 10,79427 | 3,20E-11 |
| DPYSL4   | 10,76235 | 9,77E-11 |
| EXO5     | 10,74576 | 4,79E-11 |
| PCDHA10  | 10,7415  | 5,36E-11 |
| DDIT4L   | 10,73782 | 8,44E-11 |
| RAB31    | 10,73773 | 1,55E-10 |
| COL6A2   | 10,73532 | 5,14E-11 |
| ZNF347   | 10,67226 | 9,73E-11 |
| CASC9    | 10,67012 | 6,71E-11 |
| SHISA9   | 10,65819 | 1,09E-10 |
| EHD3     | 10,64886 | 1,32E-10 |
| SYNGR1   | 10,6155  | 2,98E-10 |
| AARD     | 10,61437 | 9,48E-11 |
| PCDHA12  | 10,59859 | 1,45E-10 |
| ZNF570   | 10,59639 | 1,11E-10 |
| HPDL     | 10,58731 | 1,19E-10 |
| ZNF287   | 10,58692 | 1,10E-10 |
| STC2     | 10,57244 | 7,61E-05 |
| ELOVL2   | 10,55088 | 1,44E-10 |
| CXCR4    | 10,53595 | 1,59E-10 |
| NSUN7    | 10,52181 | 1,70E-10 |
| RNLS     | 10,49489 | 1,92E-10 |
| ZNF682   | 10,49182 | 1,95E-10 |
| ZYG11A   | 10,48245 | 6,24E-10 |
| TFF3     | 10,48196 | 2,63E-10 |
| C18orf63 | 10,47496 | 2,96E-10 |

|           |          |          |
|-----------|----------|----------|
| LINC00052 | 10,47208 | 2,43E-09 |
| RERG      | 10,46316 | 2,31E-10 |
| ERVMER34  | 10,44851 | 6,39E-10 |
| ZNF572    | 10,43944 | 3,80E-10 |
| CHFR      | 10,40148 | 2,45E-11 |
| MATK      | 10,40087 | 2,98E-38 |
| LINC00925 | 10,39606 | 3,77E-10 |
| DUSP9     | 10,39559 | 3,62E-10 |
| ERBB4     | 10,38949 | 5,48E-10 |
| ZNF569    | 10,38374 | 4,58E-11 |
| PRKAA2    | 10,38041 | 3,69E-10 |
| ZBED9     | 10,37291 | 3,80E-10 |
| BEX2      | 10,35968 | 9,66E-10 |
| ZNF486    | 10,32628 | 6,34E-10 |
| ZNF732    | 10,32627 | 9,76E-10 |
| SALL2     | 10,32364 | 3,48E-11 |
| GREB1L    | 10,30301 | 8,00E-09 |
| ASCL1     | 10,29038 | 1,29E-09 |
| FAM110B   | 10,2868  | 8,52E-10 |
| MAGEH1    | 10,26559 | 1,04E-09 |
| ADGRL2    | 10,26267 | 8,46E-10 |
| SDK1      | 10,25012 | 1,04E-09 |
| C12orf56  | 10,23597 | 8,98E-10 |
| ZNF350    | 10,23214 | 9,15E-10 |
| EPHA6     | 10,22366 | 9,23E-10 |
| FERMT2    | 10,22036 | 6,04E-11 |
| CXCL12    | 10,19548 | 1,21E-09 |
| SLC9A4    | 10,19419 | 5,83E-09 |
| ELF5      | 10,18351 | 7,66E-09 |
| PRIMA1    | 10,17464 | 5,10E-09 |
| GNB4      | 10,17118 | 1,22E-09 |
| ZNF818P   | 10,15072 | 1,40E-09 |
| NCKAP5    | 10,13181 | 1,70E-09 |
| IGFBP5    | 10,12845 | 1,65E-18 |
| SYT3      | 10,12824 | 5,25E-09 |
| CHST8     | 10,10453 | 1,79E-09 |
| HLA-DRB1  | 10,07831 | 6,49E-09 |
| MALRD1    | 10,07242 | 5,08E-09 |
| CKMT1B    | 10,07012 | 3,77E-19 |
| NOVA1     | 10,06058 | 3,44E-09 |
| ARHGDIG   | 10,05956 | 1,45E-10 |
| ZNF525    | 10,04886 | 6,96E-19 |
| ZNF529    | 10,02715 | 2,84E-09 |
| ADIRF     | 9,993416 | 5,14E-16 |
| BEND5     | 9,989825 | 4,50E-09 |
| ZNF568    | 9,988893 | 1,44E-08 |
| TUBA3E    | 9,976225 | 6,78E-09 |
| CTSF      | 9,954454 | 5,89E-09 |
| TRPV4     | 9,950384 | 6,35E-09 |
| PCDHB6    | 9,939866 | 5,90E-09 |

|           |          |          |
|-----------|----------|----------|
| ZG16B     | 9,937022 | 3,42E-08 |
| EDA2R     | 9,921779 | 1,23E-08 |
| ZNF492    | 9,920583 | 2,42E-08 |
| ZNF615    | 9,919655 | 6,94E-09 |
| MUC5B     | 9,91782  | 5,39E-09 |
| SPINK5    | 9,91124  | 2,60E-08 |
| SYNPO2    | 9,901092 | 1,13E-16 |
| ZNF790    | 9,898411 | 7,88E-09 |
| TYRP1     | 9,885693 | 6,72E-09 |
| ERC2      | 9,873483 | 6,76E-09 |
| PRLR      | 9,872352 | 4,74E-26 |
| MED12L    | 9,868654 | 8,73E-10 |
| SLITRK4   | 9,862422 | 9,98E-09 |
| RNF165    | 9,840588 | 9,16E-09 |
| ZNF772    | 9,840342 | 8,21E-09 |
| IRX4      | 9,835134 | 1,67E-08 |
| TEX15     | 9,834264 | 8,42E-09 |
| GPR158    | 9,832135 | 9,08E-09 |
| FAM19A5   | 9,806613 | 1,51E-08 |
| MFAP2     | 9,805429 | 5,79E-10 |
| CST1      | 9,804459 | 5,99E-10 |
| C5AR2     | 9,802418 | 1,64E-09 |
| ACKR3     | 9,80135  | 2,10E-33 |
| ZNF630    | 9,79352  | 1,07E-08 |
| GLI3      | 9,786185 | 7,98E-10 |
| NRXN2     | 9,778399 | 6,43E-10 |
| ZNF793    | 9,775445 | 6,75E-10 |
| PCDHGB5   | 9,773252 | 1,20E-08 |
| WDR17     | 9,767539 | 1,25E-08 |
| FAM3B     | 9,767518 | 6,66E-10 |
| RTN4RL1   | 9,758581 | 3,28E-33 |
| FUT9      | 9,753136 | 1,34E-08 |
| RASL11B   | 9,752092 | 7,24E-10 |
| TENM4     | 9,740581 | 2,57E-08 |
| DDX43     | 9,73766  | 1,90E-08 |
| COL5A1    | 9,736137 | 4,28E-08 |
| TUBA3D    | 9,733453 | 2,95E-08 |
| GPR27     | 9,731577 | 1,84E-08 |
| ZNF549    | 9,687153 | 3,02E-08 |
| PYGO1     | 9,661519 | 5,68E-08 |
| MMP16     | 9,657177 | 3,41E-08 |
| PCDHA7    | 9,645748 | 2,52E-08 |
| KLRG2     | 9,644041 | 3,10E-08 |
| ZDBF2     | 9,617959 | 5,92E-08 |
| ZNF879    | 9,602217 | 3,35E-08 |
| ZNF354C   | 9,600252 | 3,77E-08 |
| ARHGEF25  | 9,597458 | 3,85E-08 |
| BGN       | 9,589008 | 0,000134 |
| WISP2     | 9,588515 | 1,78E-06 |
| C17orf104 | 9,578011 | 1,72E-07 |

|           |          |          |
|-----------|----------|----------|
| RAB34     | 9,569217 | 1,75E-23 |
| FCGR1A    | 9,567202 | 2,03E-07 |
| ID4       | 9,549858 | 2,87E-06 |
| NPY1R     | 9,548937 | 1,43E-16 |
| EYA2      | 9,543705 | 1,66E-07 |
| AKR1C2    | 9,535713 | 1,72E-08 |
| SMARCA1   | 9,534441 | 1,12E-07 |
| HOXC-AS3  | 9,531524 | 5,52E-08 |
| SYDE1     | 9,530235 | 5,18E-08 |
| PGBD5     | 9,526925 | 6,72E-08 |
| CA8       | 9,519356 | 8,17E-08 |
| POF1B     | 9,517578 | 2,48E-21 |
| ONECUT1   | 9,51245  | 1,07E-07 |
| SIRPA     | 9,508806 | 5,47E-08 |
| COL4A5    | 9,493659 | 1,17E-07 |
| LOC339862 | 9,485725 | 7,19E-08 |
| CNGB3     | 9,4835   | 8,21E-08 |
| INHA      | 9,478977 | 5,77E-06 |
| SFMBT2    | 9,475249 | 1,12E-07 |
| RIC3      | 9,468758 | 1,18E-07 |
| NCAM2     | 9,464568 | 1,06E-15 |
| PCDHB4    | 9,434149 | 3,33E-07 |
| LINC00992 | 9,414908 | 1,08E-07 |
| CXXC4     | 9,405229 | 1,23E-07 |
| NRG3      | 9,394136 | 1,63E-07 |
| PPM1E     | 9,379547 | 2,77E-06 |
| TUB       | 9,378697 | 1,14E-07 |
| THBD      | 9,373821 | 1,45E-07 |
| SHISA2    | 9,336291 | 2,42E-07 |
| GSG1L     | 9,334491 | 1,60E-07 |
| CRABP1    | 9,317725 | 4,98E-07 |
| PGM5      | 9,317352 | 2,32E-07 |
| ADAMTS9   | 9,313517 | 1,07E-06 |
| SLC22A17  | 9,312854 | 1,75E-07 |
| SPSB4     | 9,30596  | 3,77E-07 |
| GRIK3     | 9,279889 | 8,96E-07 |
| HOXC13-AS | 9,260037 | 2,95E-07 |
| TNFRSF18  | 9,255547 | 1,65E-06 |
| AMZ1      | 9,254918 | 4,48E-07 |
| RNF150    | 9,254693 | 2,62E-07 |
| RPRM      | 9,249577 | 6,08E-07 |
| HTR2C     | 9,242047 | 2,55E-07 |
| CACNA1H   | 9,240967 | 1,19E-07 |
| TMEM163   | 9,237309 | 3,52E-07 |
| S100A9    | 9,228318 | 3,92E-05 |
| NHLRC1    | 9,216129 | 8,44E-07 |
| RADIL     | 9,214822 | 1,04E-06 |
| C3orf67   | 9,209012 | 8,21E-07 |
| CNNM1     | 9,206388 | 2,97E-07 |
| PCDHA5    | 9,204132 | 3,15E-07 |

|            |          |          |
|------------|----------|----------|
| SLC12A5    | 9,191678 | 3,22E-07 |
| CALCR      | 9,19097  | 4,50E-07 |
| KCNMB2-A   | 9,190703 | 3,25E-07 |
| SNCAIP     | 9,184104 | 3,36E-07 |
| PLEKHA8P1  | 9,173467 | 9,84E-07 |
| PLA2G3     | 9,170193 | 2,11E-06 |
| MPPED2     | 9,137487 | 1,57E-06 |
| ELOVL4     | 9,124756 | 1,16E-06 |
| PCDHB16    | 9,124317 | 1,16E-20 |
| TPTE       | 9,123467 | 5,52E-07 |
| FBXO15     | 9,121688 | 4,82E-07 |
| LOC644915  | 9,112071 | 7,64E-07 |
| MGAT5B     | 9,103718 | 8,15E-07 |
| ADAMTS19   | 9,098045 | 5,60E-07 |
| DSCAM      | 9,091345 | 1,29E-06 |
| CIART      | 9,077921 | 2,91E-23 |
| BEX4       | 9,076557 | 6,39E-07 |
| SLC25A21-1 | 9,074296 | 7,40E-06 |
| TENM1      | 9,071485 | 1,01E-06 |
| PRICKLE2-A | 9,066576 | 7,25E-07 |
| LOC339803  | 9,06613  | 1,48E-06 |
| HOMER2     | 9,061482 | 2,38E-12 |
| SEMA3D     | 9,056499 | 2,16E-06 |
| LINC00664  | 9,051103 | 1,47E-06 |
| MB21D1     | 9,049926 | 7,96E-07 |
| KRT23      | 9,045971 | 7,26E-07 |
| A1BG-AS1   | 9,045527 | 2,80E-08 |
| PCDHA13    | 9,030977 | 8,19E-07 |
| LINC00665  | 9,020751 | 1,11E-20 |
| PCDHGB1    | 9,019905 | 3,15E-08 |
| PRTG       | 8,994931 | 9,73E-07 |
| MTMR7      | 8,994558 | 9,69E-07 |
| CEACAM1    | 8,952554 | 4,20E-08 |
| GNG4       | 8,945217 | 2,82E-06 |
| MAGEE1     | 8,944729 | 1,49E-06 |
| LOC728735  | 8,943651 | 1,44E-06 |
| MAP10      | 8,930739 | 2,02E-06 |
| ZNF530     | 8,916482 | 1,62E-06 |
| FAM81B     | 8,909213 | 2,02E-06 |
| ZIC4       | 8,884681 | 1,77E-06 |
| SLC24A3    | 8,884634 | 5,79E-08 |
| VAX2       | 8,869128 | 2,21E-06 |
| SNAP25     | 8,840921 | 2,75E-06 |
| ANK1       | 8,839004 | 3,57E-05 |
| EPHA4      | 8,836724 | 4,75E-06 |
| ARMCX1     | 8,835459 | 4,15E-06 |
| RFTN2      | 8,833901 | 3,99E-06 |
| TMEM132F   | 8,826407 | 0,00011  |
| SLFN11     | 8,800151 | 3,26E-06 |
| DOCK10     | 8,794527 | 4,82E-06 |



|           |          |          |
|-----------|----------|----------|
| RAI2      | 8,794527 | 4,82E-06 |
| LOC728392 | 8,777575 | 7,90E-06 |
| TTC29     | 8,776723 | 3,24E-06 |
| ANKRD18B  | 8,76368  | 1,22E-07 |
| HLA-DRB5  | 8,751955 | 5,43E-06 |
| EGFL7     | 8,74991  | 9,64E-07 |
| PAX2      | 8,736957 | 8,36E-05 |
| PVALB     | 8,735846 | 1,01E-05 |
| NMUR2     | 8,734073 | 3,98E-06 |
| ZNF726    | 8,727807 | 1,13E-05 |
| TCHHL1    | 8,717545 | 0,000184 |
| UNC5C     | 8,715441 | 1,29E-05 |
| SOX18     | 8,698495 | 4,78E-06 |
| SNAR-E    | 8,686466 | 1,16E-05 |
| GATA5     | 8,684125 | 5,72E-06 |
| TNNT1     | 8,672667 | 5,76E-13 |
| GJA1      | 8,669515 | 2,91E-05 |
| WIF1      | 8,668554 | 3,43E-05 |
| USP51     | 8,66771  | 9,14E-06 |
| PCDH9     | 8,667105 | 9,92E-06 |
| LRRK2     | 8,664269 | 7,90E-06 |
| IGFL1     | 8,661223 | 0,00018  |
| LOC100125 | 8,64432  | 6,30E-06 |
| GUCY1B3   | 8,640412 | 8,13E-06 |
| SLC6A14   | 8,637063 | 7,01E-06 |
| RET       | 8,628736 | 1,09E-11 |
| PCP4      | 8,606194 | 1,86E-18 |
| FAM196A   | 8,603386 | 2,36E-05 |
| ZNF98     | 8,59805  | 1,57E-05 |
| F7        | 8,557288 | 3,80E-05 |
| DLX3      | 8,535824 | 2,08E-05 |
| TARP      | 8,53361  | 4,41E-05 |
| PCDHGA4   | 8,532653 | 1,37E-05 |
| MAPK4     | 8,511034 | 2,31E-06 |
| PACSIN1   | 8,491847 | 3,76E-16 |
| C10orf82  | 8,48449  | 5,84E-07 |
| PART1     | 8,484019 | 1,72E-05 |
| TRIL      | 8,479313 | 2,37E-05 |
| FLT3      | 8,463026 | 1,62E-05 |
| TRAM1L1   | 8,454765 | 4,31E-05 |
| ACTG2     | 8,453803 | 3,66E-06 |
| WFDC2     | 8,438235 | 3,24E-05 |
| SPOCK1    | 8,417745 | 2,63E-05 |
| FOXI3     | 8,417631 | 2,21E-05 |
| POU6F2    | 8,407022 | 2,42E-05 |
| MYT1      | 8,405425 | 6,03E-07 |
| GRID1     | 8,40477  | 2,76E-05 |
| EDN1      | 8,388377 | 2,04E-15 |
| CDH18     | 8,379038 | 2,95E-05 |
| HIST1H3G  | 8,376053 | 2,59E-05 |

|           |          |          |
|-----------|----------|----------|
| GHR       | 8,374908 | 2,54E-05 |
| DIRAS1    | 8,373828 | 3,34E-30 |
| EFNB3     | 8,370232 | 5,64E-12 |
| VIM-AS1   | 8,365007 | 3,01E-05 |
| MSRB3     | 8,363273 | 2,84E-05 |
| ZNF512B   | 8,351877 | 8,11E-45 |
| OLFM1     | 8,347818 | 4,05E-27 |
| RNF180    | 8,335124 | 4,38E-05 |
| SLIT2     | 8,331474 | 3,08E-05 |
| ZNF345    | 8,329112 | 3,16E-05 |
| XKR7      | 8,315214 | 5,79E-05 |
| MAFB      | 8,291527 | 2,40E-20 |
| FIRRE     | 8,286017 | 2,47E-06 |
| RIBC2     | 8,282362 | 0,000168 |
| LPPR3     | 8,281734 | 0,000184 |
| PCDHGA5   | 8,279224 | 4,40E-05 |
| SPEG      | 8,276772 | 4,15E-05 |
| TH        | 8,270516 | 6,45E-05 |
| FBN2      | 8,265952 | 9,91E-11 |
| ADAMTSL3  | 8,264437 | 5,92E-05 |
| SNCB      | 8,252471 | 0,000257 |
| XG        | 8,240529 | 0,000477 |
| ICOS      | 8,239214 | 5,37E-05 |
| ARL11     | 8,234025 | 5,34E-05 |
| LOC101927 | 8,233508 | 7,57E-05 |
| LOC440461 | 8,228883 | 0,000101 |
| EMCN      | 8,219916 | 5,89E-05 |
| EWSAT1    | 8,216821 | 9,36E-05 |
| CBFA2T3   | 8,215246 | 2,92E-05 |
| ZNF423    | 8,214804 | 5,47E-05 |
| PCDHAC1   | 8,212788 | 0,000101 |
| GSC       | 8,210957 | 0,000174 |
| KCNF1     | 8,207095 | 6,83E-05 |
| LINC00885 | 8,205069 | 0,000244 |
| ZNF93     | 8,203395 | 3,08E-05 |
| IGSF1     | 8,189363 | 0,000255 |
| BEX5      | 8,186029 | 0,000172 |
| NXPH3     | 8,179393 | 9,70E-05 |
| TP53INP1  | 8,177881 | 2,02E-24 |
| GPM6B     | 8,166847 | 6,91E-05 |
| PCBP3     | 8,166465 | 4,16E-11 |
| KCNU1     | 8,16287  | 7,67E-05 |
| ZNF730    | 8,156274 | 2,14E-06 |
| CYP4F22   | 8,128845 | 0,000103 |
| CCSER1    | 8,128303 | 0,000102 |
| SGCG      | 8,120034 | 0,000198 |
| ALOX12P2  | 8,117241 | 0,000271 |
| CALML5    | 8,116434 | 0,000139 |
| CPEB1     | 8,112287 | 0,000109 |
| RIMS2     | 8,112287 | 0,000109 |

|           |          |           |
|-----------|----------|-----------|
| GJB5      | 8,109574 | 0,000386  |
| NRK       | 8,106751 | 0,000273  |
| PCDHB9    | 8,102737 | 4,88E-11  |
| C20orf194 | 8,099435 | 2,53E-06  |
| WASF3     | 8,086964 | 1,12E-20  |
| ZNF155    | 8,079296 | 0,000128  |
| SARDH     | 8,070754 | 0,000245  |
| NDNF      | 8,069411 | 0,000109  |
| CD36      | 8,068599 | 0,000204  |
| DRD1      | 8,063615 | 0,00064   |
| C8orf48   | 8,060014 | 0,000126  |
| SULF2     | 8,05757  | 2,51E-126 |
| CAPN9     | 8,04568  | 0,000149  |
| DEFB126   | 8,034688 | 0,000129  |
| LOC441666 | 8,027253 | 0,000156  |
| SNAR-G1   | 8,010961 | 0,000177  |
| PHF21B    | 7,996037 | 0,000766  |
| PNMA6A    | 7,992385 | 0,000203  |
| KDR       | 7,990736 | 0,000174  |
| ZFP3      | 7,98958  | 7,19E-28  |
| B4GALNT1  | 7,969386 | 2,17E-20  |
| HOXC13    | 7,968536 | 1,53E-18  |
| LRP2      | 7,967447 | 5,32E-17  |
| FLRT3     | 7,957453 | 2,43E-63  |
| BLNK      | 7,945738 | 5,12E-05  |
| NKILA     | 7,945582 | 0,000195  |
| IBSP      | 7,94481  | 0,000198  |
| RDH16     | 7,944641 | 3,35E-18  |
| PABPC4L   | 7,938604 | 0,000256  |
| SLC5A5    | 7,927442 | 0,000409  |
| PARVB     | 7,921669 | 4,77E-23  |
| PAPLN     | 7,919696 | 0,000285  |
| IFI44L    | 7,918364 | 6,51E-05  |
| KCNJ4     | 7,916388 | 0,000233  |
| LINC00494 | 7,910079 | 0,000225  |
| PMEPA1    | 7,909712 | 4,23E-53  |
| CEACAM5   | 7,909187 | 0,000461  |
| LRRIQ1    | 7,907705 | 0,000235  |
| DAAM2     | 7,890793 | 0,000246  |
| NAP1L2    | 7,888258 | 0,000434  |
| CA4       | 7,883551 | 0,000311  |
| ZNF790-AS | 7,877029 | 4,39E-10  |
| ZNF547    | 7,873679 | 0,000262  |
| EDIL3     | 7,873623 | 0,000692  |
| TIMP3     | 7,868399 | 7,09E-10  |
| VAV1      | 7,853819 | 8,16E-10  |
| ZNF304    | 7,846697 | 2,68E-30  |
| ALOX15    | 7,840508 | 1,73E-18  |
| PTPRG-AS1 | 7,839038 | 1,66E-14  |
| NDRG4     | 7,83144  | 1,31E-12  |

|           |          |          |
|-----------|----------|----------|
| ZNF529-AS | 7,813502 | 0,000342 |
| BRINP2    | 7,809125 | 0,000589 |
| COL3A1    | 7,806554 | 0,000504 |
| GPC3      | 7,797252 | 0,000757 |
| PIK3C2G   | 7,793659 | 0,000941 |
| C8orf46   | 7,790297 | 0,000394 |
| FAR2P1    | 7,786166 | 9,55E-09 |
| MB        | 7,778151 | 1,14E-17 |
| PCDHB10   | 7,75852  | 1,18E-05 |
| ZNF793-AS | 7,754229 | 0,000443 |
| PCDHGB3   | 7,752468 | 0,000445 |
| ARHGDIB   | 7,746177 | 0,000286 |
| C17orf51  | 7,721037 | 0,000672 |
| FILIP1L   | 7,691498 | 0,000582 |
| LRFN5     | 7,690579 | 0,000579 |
| DPY19L2P1 | 7,6765   | 0,000742 |
| FHL1      | 7,672767 | 0,000668 |
| FNBP1     | 7,670933 | 4,39E-54 |
| PACRG     | 7,66248  | 0,000677 |
| PLXNA4    | 7,652195 | 2,27E-15 |
| SOX11     | 7,650953 | 0,000739 |
| PDIA2     | 7,643364 | 0,000703 |
| KRT81     | 7,638751 | 1,38E-10 |
| MEIS1     | 7,635725 | 0,000854 |
| ST8SIA1   | 7,626879 | 0,000787 |
| C19orf81  | 7,619254 | 2,32E-05 |
| TNFRSF11B | 7,619164 | 0,000783 |
| FGF13     | 7,611388 | 0,001003 |
| DCLK1     | 7,606463 | 4,56E-40 |
| JPH3      | 7,605847 | 3,79E-09 |
| HAGLROS   | 7,59848  | 0,000839 |
| PTPRQ     | 7,596517 | 0,000855 |
| SLCO4C1   | 7,591592 | 0,000962 |
| PDZD4     | 7,583032 | 1,25E-12 |
| ABCC8     | 7,575503 | 0,000921 |
| LHX2      | 7,568875 | 3,48E-05 |
| GATA3     | 7,541784 | 7,07E-67 |
| KIF5C     | 7,49482  | 4,58E-05 |
| SALL4     | 7,456777 | 2,38E-11 |
| AMOTL1    | 7,449595 | 8,61E-40 |
| CCL5      | 7,430154 | 6,93E-07 |
| MAP1B     | 7,412889 | 1,54E-24 |
| PCDH19    | 7,411947 | 8,33E-05 |
| ZNF614    | 7,364365 | 3,09E-28 |
| MYLK      | 7,3594   | 6,76E-05 |
| LOC10013C | 7,356492 | 7,43E-05 |
| FBXO27    | 7,353658 | 7,74E-34 |
| FCHO1     | 7,339099 | 5,90E-67 |
| CRLF1     | 7,327358 | 5,00E-08 |
| RGAG4     | 7,309785 | 8,19E-08 |

|           |          |           |
|-----------|----------|-----------|
| PCDHGB2   | 7,275853 | 0,000113  |
| DNAJA4    | 7,252774 | 9,99E-33  |
| SEMA3C    | 7,243898 | 2,39E-132 |
| ATRNL1    | 7,176054 | 0,000143  |
| SLC25A21  | 7,172936 | 0,000148  |
| MARCH1    | 7,171825 | 2,55E-07  |
| UPK3B     | 7,167938 | 0,000494  |
| RIMKLB    | 7,164873 | 6,36E-34  |
| TUSC3     | 7,163633 | 1,24E-45  |
| AP4B1-AS1 | 7,151144 | 2,34E-20  |
| SPTSSB    | 7,125687 | 5,26E-29  |
| CERS4     | 7,118084 | 3,55E-17  |
| PCDHB2    | 7,116907 | 4,92E-38  |
| TMEM37    | 7,109778 | 7,43E-26  |
| KCNMA1    | 7,106614 | 4,83E-07  |
| DNALI1    | 7,1043   | 0,000197  |
| ADAMTS19  | 7,091058 | 1,13E-47  |
| TBC1D9    | 7,084568 | 1,31E-90  |
| DHRS2     | 7,039216 | 6,60E-39  |
| HIST1H2AE | 7,032101 | 0,000765  |
| PRICKLE2  | 6,999566 | 1,31E-51  |
| KIAA1324  | 6,969253 | 4,80E-06  |
| CYP1A1    | 6,948864 | 8,81E-09  |
| DPYSL5    | 6,907482 | 2,56E-21  |
| PREX1     | 6,893009 | 4,86E-78  |
| APOA1     | 6,880846 | 0,000466  |
| ZNF467    | 6,864893 | 1,55E-45  |
| GATA3-AS1 | 6,864765 | 0,00052   |
| NUP210L   | 6,8636   | 6,61E-25  |
| ZNF302    | 6,808967 | 6,23E-27  |
| MRI1      | 6,794372 | 1,68E-36  |
| WIPF1     | 6,754245 | 0,000702  |
| SH3GL3    | 6,751788 | 2,39E-06  |
| LDHD      | 6,716967 | 3,84E-07  |
| GNAS-AS1  | 6,713782 | 0,000798  |
| CCL2      | 6,696965 | 1,08E-08  |
| CSTA      | 6,696502 | 1,28E-09  |
| TDRD1     | 6,691593 | 1,05E-25  |
| SYT5      | 6,68305  | 0,00091   |
| TLX1NB    | 6,67414  | 0,000962  |
| RASSF2    | 6,650467 | 2,17E-08  |
| FLT4      | 6,632761 | 1,82E-05  |
| RND2      | 6,627384 | 6,77E-18  |
| PTPRS     | 6,553692 | 2,18E-50  |
| HBA1      | 6,546274 | 3,01E-07  |
| HSPA1A    | 6,539755 | 6,22E-27  |
| FAM101B   | 6,530443 | 8,54E-06  |
| CHST11    | 6,527232 | 3,35E-41  |
| PCSK1N    | 6,523186 | 1,16E-37  |
| MDK       | 6,500897 | 1,19E-62  |

|          |          |           |
|----------|----------|-----------|
| ECHDC3   | 6,488805 | 1,38E-10  |
| CAMK2B   | 6,478044 | 3,40E-12  |
| NFATC1   | 6,469721 | 5,12E-12  |
| SLC8A1   | 6,451777 | 6,15E-15  |
| IGF1     | 6,439017 | 9,44E-06  |
| OLFM2    | 6,429342 | 1,32E-23  |
| C2orf74  | 6,410526 | 6,73E-08  |
| RNF182   | 6,408051 | 6,47E-18  |
| PCED1B   | 6,400561 | 2,98E-05  |
| VIM      | 6,377832 | 2,83E-05  |
| UPK2     | 6,375548 | 2,93E-08  |
| HCN2     | 6,369543 | 1,61E-26  |
| BCL11B   | 6,365305 | 3,26E-53  |
| BMP2     | 6,32244  | 6,73E-47  |
| TIGD7    | 6,319351 | 3,94E-05  |
| GNG13    | 6,316984 | 6,33E-07  |
| SHANK1   | 6,303675 | 2,87E-06  |
| SHC2     | 6,29574  | 9,38E-05  |
| TUBB4A   | 6,294287 | 8,72E-09  |
| GREB1    | 6,264173 | 1,03E-75  |
| NODAL    | 6,256146 | 0,000102  |
| WDR72    | 6,245963 | 3,43E-27  |
| CD24     | 6,234964 | 1,68E-79  |
| FGD1     | 6,229035 | 2,35E-23  |
| ETNK2    | 6,220881 | 2,28E-37  |
| KCNN4    | 6,211672 | 2,51E-10  |
| ST8SIA4  | 6,210086 | 1,98E-16  |
| RHOBTB1  | 6,181665 | 5,28E-129 |
| HOXC10   | 6,179927 | 1,55E-39  |
| HPN      | 6,178262 | 3,70E-18  |
| ZNF610   | 6,173175 | 7,21E-05  |
| INPP4B   | 6,157576 | 3,42E-40  |
| NELL2    | 6,15547  | 0,000168  |
| UCP2     | 6,144526 | 9,20E-100 |
| ZNF114   | 6,134301 | 2,40E-23  |
| PCAT6    | 6,130764 | 9,11E-05  |
| ZNF550   | 6,111569 | 4,20E-05  |
| A1BG     | 6,109214 | 6,00E-10  |
| PCLO     | 6,107469 | 4,67E-30  |
| LYPD3    | 6,100447 | 7,23E-16  |
| SLC22A31 | 6,066771 | 3,11E-07  |
| RPP25    | 6,056751 | 5,61E-37  |
| IGFBP3   | 6,027321 | 2,59E-07  |
| TRPS1    | 6,021314 | 4,87E-84  |
| PKIB     | 6,019833 | 3,49E-56  |
| VSTM2L   | 6,017575 | 0,000115  |
| RENB     | 6,007876 | 0,00015   |
| PRAME    | 5,999086 | 1,16E-12  |
| NPR3     | 5,998584 | 1,12E-23  |
| CALD1    | 5,987135 | 4,60E-09  |

|           |          |          |
|-----------|----------|----------|
| FAM20C    | 5,975162 | 5,27E-20 |
| LCP1      | 5,910377 | 1,10E-27 |
| ABCB6     | 5,90875  | 9,43E-54 |
| HTRA1     | 5,902424 | 5,78E-22 |
| C1orf233  | 5,900041 | 2,11E-55 |
| TBX2-AS1  | 5,897034 | 1,12E-11 |
| FAM69B    | 5,888908 | 1,11E-12 |
| LINC00886 | 5,88871  | 8,81E-14 |
| IGSF5     | 5,850408 | 3,13E-07 |
| FGFR4     | 5,850092 | 4,03E-54 |
| PCDHGA1   | 5,820413 | 0,000259 |
| SIDT1     | 5,818504 | 1,08E-15 |
| COL9A2    | 5,811118 | 6,32E-14 |
| LINC01006 | 5,809716 | 8,94E-06 |
| FAM198B   | 5,809324 | 1,39E-19 |
| KHDC1     | 5,756928 | 0,000906 |
| PALM      | 5,717439 | 2,37E-19 |
| DLGAP3    | 5,713587 | 3,76E-15 |
| KIF1A     | 5,695326 | 1,04E-46 |
| YBX2      | 5,673939 | 6,64E-50 |
| ITGA2B    | 5,670269 | 1,05E-09 |
| IFI27     | 5,664103 | 2,01E-06 |
| ENTPD1    | 5,65227  | 5,82E-14 |
| JAM2      | 5,634845 | 9,83E-05 |
| TTC28     | 5,633596 | 8,77E-12 |
| CYP1B1    | 5,623458 | 2,10E-24 |
| LRIG1     | 5,613511 | 1,48E-10 |
| C14orf37  | 5,584641 | 2,82E-06 |
| MANSC4    | 5,543078 | 2,27E-05 |
| NRSN2     | 5,541817 | 4,08E-23 |
| TTN-AS1   | 5,539068 | 0,00099  |
| ARC       | 5,535545 | 1,98E-07 |
| B3GALT4   | 5,522215 | 2,63E-05 |
| BCAS3     | 5,51217  | 1,55E-60 |
| NPAS3     | 5,486139 | 0,0005   |
| HHAT      | 5,456927 | 7,72E-07 |
| COL18A1   | 5,4492   | 1,48E-58 |
| PLXDC2    | 5,435939 | 6,28E-33 |
| TMEM229E  | 5,425635 | 1,09E-16 |
| FRMD6-AS1 | 5,414243 | 6,61E-07 |
| TEX19     | 5,40905  | 3,34E-08 |
| LINGO1    | 5,392236 | 1,40E-49 |
| KIAA1324L | 5,391856 | 5,38E-47 |
| P3H2      | 5,34857  | 2,28E-16 |
| ZBTB7C    | 5,345057 | 4,74E-07 |
| CNIH2     | 5,33844  | 5,23E-19 |
| PROM2     | 5,323381 | 2,98E-28 |
| APCDD1    | 5,276923 | 1,87E-18 |
| KLHL13    | 5,259367 | 5,21E-09 |
| TNFAIP8L3 | 5,247228 | 1,10E-20 |

|           |          |          |
|-----------|----------|----------|
| GPNMB     | 5,240145 | 5,19E-25 |
| MCC       | 5,234503 | 4,27E-08 |
| ATP6V0A4  | 5,212878 | 0,000677 |
| CYP24A1   | 5,153249 | 1,19E-07 |
| MAPK8IP1  | 5,148213 | 7,38E-23 |
| RINL      | 5,147567 | 9,76E-09 |
| GNG7      | 5,143712 | 1,59E-08 |
| PLIN2     | 5,121788 | 4,88E-10 |
| TMEM150C  | 5,120575 | 2,04E-16 |
| P2RY2     | 5,111378 | 9,19E-23 |
| ANKRD6    | 5,109146 | 6,17E-05 |
| CACNA2D1  | 5,09358  | 7,90E-16 |
| HES2      | 5,086522 | 1,93E-09 |
| WNT6      | 5,061169 | 1,15E-05 |
| RBMS1     | 5,053348 | 2,23E-38 |
| LYPD1     | 5,050464 | 5,55E-10 |
| DEF6      | 5,028628 | 4,49E-16 |
| FAM109B   | 5,020481 | 3,04E-14 |
| MAP2K6    | 5,017535 | 1,41E-05 |
| CKB       | 5,010472 | 6,71E-27 |
| FAM46C    | 4,959239 | 1,28E-12 |
| OGDHL     | 4,950264 | 6,12E-21 |
| SPATA17   | 4,946956 | 2,94E-11 |
| SIX1      | 4,916993 | 1,45E-24 |
| ABLIM3    | 4,909931 | 5,94E-05 |
| ECHDC2    | 4,896349 | 3,46E-11 |
| ARHGAP4   | 4,890123 | 1,04E-10 |
| ERG       | 4,881965 | 2,55E-06 |
| HS6ST3    | 4,87939  | 0,000818 |
| RIPPLY3   | 4,875492 | 5,48E-05 |
| STON2     | 4,823918 | 1,13E-34 |
| C16orf45  | 4,811901 | 2,12E-05 |
| OAS2      | 4,81111  | 0,000316 |
| PCDHGA6   | 4,807086 | 0,000694 |
| BMF       | 4,806099 | 9,05E-07 |
| CELF5     | 4,802362 | 2,76E-07 |
| RGS14     | 4,791011 | 3,46E-18 |
| HIST1H2BH | 4,774529 | 0,000228 |
| SLCO3A1   | 4,772043 | 8,41E-09 |
| KRT17     | 4,768338 | 1,22E-06 |
| SUSD2     | 4,750213 | 2,31E-09 |
| HLA-DQB1  | 4,744778 | 2,55E-07 |
| SOCS1     | 4,744096 | 3,04E-12 |
| RGS17     | 4,736385 | 0,000332 |
| ZNF433    | 4,732872 | 4,27E-09 |
| EEF1A2    | 4,695411 | 2,03E-05 |
| RUNDC3A   | 4,674135 | 0,000168 |
| C2CD4C    | 4,665505 | 0,000831 |
| HMCN1     | 4,660331 | 0,000213 |
| NEB       | 4,659666 | 2,85E-33 |



|           |          |          |
|-----------|----------|----------|
| OLFML3    | 4,658768 | 0,000124 |
| TCEA3     | 4,656823 | 1,43E-35 |
| LOXL1-AS1 | 4,653322 | 2,19E-05 |
| KRT86     | 4,645182 | 0,000124 |
| CACNG4    | 4,641652 | 5,18E-34 |
| TSPEAR    | 4,612706 | 7,76E-08 |
| SEMA6A    | 4,603548 | 1,92E-13 |
| TP53TG1   | 4,603482 | 7,15E-23 |
| ABCG1     | 4,601026 | 8,80E-08 |
| CMTM3     | 4,594483 | 1,58E-08 |
| CHRM1     | 4,591863 | 1,10E-09 |
| LOX       | 4,577035 | 0,000127 |
| GLUD2     | 4,576987 | 1,17E-15 |
| ST3GAL1   | 4,572296 | 7,87E-20 |
| FOXA2     | 4,568752 | 0,000115 |
| ZNF461    | 4,553474 | 7,78E-08 |
| HOXD12    | 4,552545 | 0,00071  |
| RCN3      | 4,544247 | 4,46E-05 |
| MUC1      | 4,541145 | 4,01E-15 |
| LONRF2    | 4,515429 | 7,15E-21 |
| SERHL2    | 4,502201 | 0,000314 |
| CDYL2     | 4,494359 | 2,30E-13 |
| LOC728554 | 4,488191 | 1,62E-21 |
| FBP1      | 4,479201 | 3,89E-62 |
| SEC31A    | 4,461775 | 1,15E-45 |
| AK7       | 4,449337 | 5,37E-34 |
| ISYNA1    | 4,448357 | 6,17E-27 |
| FSTL4     | 4,405357 | 1,49E-06 |
| CTXN1     | 4,391017 | 2,50E-57 |
| TINCR     | 4,389555 | 1,93E-11 |
| DDAH2     | 4,383248 | 1,42E-31 |
| ARHGEF10  | 4,382559 | 1,67E-10 |
| ZNF701    | 4,359647 | 2,36E-21 |
| USP32     | 4,354479 | 1,79E-34 |
| FXD3      | 4,342717 | 1,55E-11 |
| PFDN4     | 4,341927 | 1,88E-62 |
| AEBP1     | 4,331768 | 1,53E-05 |
| LMO2      | 4,319251 | 0,000739 |
| S100P     | 4,310627 | 0,000365 |
| KCNJ3     | 4,306773 | 2,44E-07 |
| TUBA1A    | 4,28584  | 6,16E-51 |
| STMND1    | 4,277598 | 2,89E-05 |
| SERPINI1  | 4,275834 | 2,13E-06 |
| HOTAIR    | 4,272042 | 4,45E-05 |
| MEX3B     | 4,264261 | 2,74E-37 |
| ZNF385A   | 4,252423 | 2,37E-54 |
| REPS2     | 4,247116 | 7,19E-07 |
| COL6A1    | 4,235951 | 3,69E-09 |
| CEL       | 4,220445 | 1,28E-05 |
| NOTCH3    | 4,208004 | 1,53E-57 |

|           |          |          |
|-----------|----------|----------|
| HCN4      | 4,154597 | 2,09E-07 |
| TFAP2C    | 4,151628 | 2,15E-44 |
| SOX4      | 4,131974 | 1,98E-54 |
| PADI2     | 4,119553 | 2,93E-06 |
| IGSF9     | 4,117282 | 2,13E-52 |
| RN7SK     | 4,108843 | 2,47E-05 |
| LOC101926 | 4,103044 | 0,000852 |
| KLHDC8B   | 4,072817 | 1,17E-06 |
| NFE2      | 4,072811 | 3,81E-11 |
| ATOH8     | 4,058612 | 2,51E-09 |
| FEZ1      | 4,045256 | 1,28E-05 |
| PCDHB14   | 4,036226 | 2,02E-13 |
| PLCB1     | 4,03491  | 2,46E-17 |
| STARD13   | 4,018847 | 7,35E-14 |
| KCNH3     | 4,013305 | 0,000237 |
| FRMPD1    | 4,011254 | 2,91E-05 |
| SMAD6     | 4,005844 | 7,10E-14 |
| IGSF10    | 4,003827 | 0,000241 |
| RASD1     | 4,002678 | 0,00027  |
| SLC30A3   | 3,988291 | 2,14E-05 |
| MEX3A     | 3,974337 | 2,65E-62 |
| PGM2L1    | 3,960737 | 1,24E-29 |
| DNAAF3    | 3,955156 | 1,80E-19 |
| SOCS3     | 3,950272 | 1,12E-08 |
| AMOT      | 3,947028 | 3,69E-26 |
| TMEM254-  | 3,913301 | 6,33E-05 |
| PBX1      | 3,879096 | 2,25E-07 |
| PLEKHO1   | 3,877206 | 1,08E-12 |
| PLXNB3    | 3,876029 | 1,26E-14 |
| GRHL3     | 3,84583  | 1,46E-18 |
| FRMD6     | 3,843759 | 1,00E-28 |
| SHF       | 3,843294 | 4,08E-09 |
| HOXC11    | 3,828864 | 3,96E-10 |
| MGLL      | 3,812111 | 1,11E-08 |
| FAM171A2  | 3,808234 | 1,59E-21 |
| RAB30     | 3,774609 | 6,30E-20 |
| NREP      | 3,763561 | 6,96E-19 |
| RASSF10   | 3,755065 | 1,12E-05 |
| GTF2I     | 3,754515 | 5,33E-49 |
| AMIGO2    | 3,744839 | 1,27E-07 |
| ZMIZ1     | 3,719394 | 1,17E-38 |
| FGFR3     | 3,71562  | 7,15E-18 |
| AKR1E2    | 3,70362  | 2,90E-06 |
| BOLA1     | 3,700583 | 5,98E-22 |
| DLX4      | 3,695904 | 5,99E-05 |
| MSH6      | 3,685478 | 1,03E-38 |
| HECW2     | 3,67324  | 2,00E-10 |
| CNPY4     | 3,668934 | 2,61E-12 |
| DBN1      | 3,668313 | 8,29E-61 |
| KDM5B     | 3,661349 | 4,90E-31 |

|          |          |          |
|----------|----------|----------|
| MAML3    | 3,654701 | 1,01E-07 |
| DMKN     | 3,649759 | 5,78E-09 |
| BAMBI    | 3,639699 | 2,47E-36 |
| LHX1     | 3,629231 | 2,73E-05 |
| ALDOC    | 3,626278 | 3,60E-13 |
| NCOA3    | 3,623819 | 3,65E-41 |
| PDE4A    | 3,608944 | 2,13E-08 |
| CCNG2    | 3,6038   | 2,86E-12 |
| HSD17B14 | 3,597977 | 0,000129 |
| ASPHD1   | 3,59734  | 1,92E-09 |
| SAMD11   | 3,588226 | 3,54E-07 |
| PPM1D    | 3,57981  | 7,70E-43 |
| GADD45G  | 3,575317 | 5,52E-05 |
| NRXN3    | 3,565532 | 7,42E-06 |
| ZNF836   | 3,564832 | 7,75E-09 |
| SCIN     | 3,551562 | 0,000742 |
| HR       | 3,550387 | 8,57E-18 |
| FN1      | 3,546392 | 0,000278 |
| RASGEF1A | 3,545901 | 1,81E-06 |
| HSPA2    | 3,538783 | 1,96E-07 |
| LGALS1   | 3,498965 | 2,55E-13 |
| SERTAD4  | 3,494699 | 2,62E-14 |
| PSMD6    | 3,487285 | 1,17E-46 |
| TBX2     | 3,482634 | 1,71E-14 |
| CCDC83   | 3,479458 | 0,000355 |
| FAM227B  | 3,475075 | 1,93E-07 |
| SIAH2    | 3,470894 | 2,20E-29 |
| SEMA4A   | 3,469472 | 1,04E-18 |
| PTCHD2   | 3,467411 | 0,000549 |
| SLC9A3R2 | 3,464996 | 4,71E-32 |
| LTBP2    | 3,458579 | 0,000288 |
| SEZ6L2   | 3,4559   | 2,67E-18 |
| CRABP2   | 3,448691 | 1,24E-14 |
| LFNG     | 3,445389 | 1,83E-12 |
| CERCAM   | 3,410795 | 2,07E-15 |
| NPW      | 3,408886 | 0,00029  |
| PTP4A3   | 3,403682 | 1,25E-10 |
| ESRP1    | 3,40324  | 4,31E-11 |
| TMEM121  | 3,389567 | 2,79E-06 |
| WNT11    | 3,377137 | 3,33E-05 |
| RTN1     | 3,376443 | 0,000681 |
| FAM72B   | 3,374941 | 3,37E-09 |
| STARD10  | 3,37054  | 6,40E-19 |
| TNS1     | 3,346603 | 5,26E-08 |
| CYP2J2   | 3,344374 | 3,58E-09 |
| APOE     | 3,329936 | 2,30E-06 |
| RCOR2    | 3,328888 | 1,36E-09 |
| GSTA4    | 3,323097 | 5,63E-12 |
| ASAH2    | 3,320009 | 1,18E-12 |
| ZFYVE28  | 3,319145 | 4,39E-10 |

|           |          |          |
|-----------|----------|----------|
| BRIP1     | 3,312826 | 1,10E-38 |
| CACNB3    | 3,306518 | 2,31E-32 |
| ATP8B2    | 3,296884 | 1,40E-10 |
| NANOS1    | 3,296503 | 6,46E-18 |
| PBXIP1    | 3,264187 | 1,25E-07 |
| CCDC71L   | 3,256252 | 1,35E-12 |
| MUC3A     | 3,25475  | 0,000441 |
| SCAMP5    | 3,253648 | 2,32E-10 |
| PCDHB13   | 3,251279 | 8,95E-10 |
| CCDC170   | 3,244558 | 2,82E-07 |
| ZNF704    | 3,241048 | 1,03E-18 |
| MEIS3P1   | 3,229736 | 9,08E-09 |
| NR3C1     | 3,227149 | 5,17E-31 |
| NKAIN1    | 3,226665 | 8,30E-16 |
| PRSS23    | 3,220837 | 6,41E-18 |
| SYNE4     | 3,205183 | 6,26E-25 |
| PLCH1     | 3,203041 | 2,80E-22 |
| DAB2IP    | 3,198741 | 4,76E-17 |
| APPBP2    | 3,198527 | 4,62E-32 |
| PCAT7     | 3,19382  | 0,00056  |
| GATS      | 3,178096 | 9,69E-10 |
| FUT8-AS1  | 3,173703 | 0,000206 |
| ARHGEF19  | 3,171564 | 5,06E-13 |
| GLUL      | 3,164777 | 2,70E-48 |
| KRT8      | 3,160935 | 5,20E-20 |
| TET1      | 3,152902 | 6,77E-07 |
| MECOM     | 3,139919 | 2,17E-10 |
| C15orf65  | 3,13038  | 2,17E-05 |
| DYRK1B    | 3,128045 | 4,41E-21 |
| SESN3     | 3,121744 | 0,000966 |
| AHR       | 3,121385 | 2,40E-28 |
| RUNDC3A-  | 3,120855 | 5,74E-05 |
| TMPRSS13  | 3,11984  | 1,59E-10 |
| ADAMTS7   | 3,111694 | 8,85E-06 |
| ZNF561-AS | 3,108101 | 6,32E-05 |
| KCNC3     | 3,094988 | 2,04E-17 |
| PITPNC1   | 3,091805 | 2,34E-30 |
| CPE       | 3,08921  | 6,45E-05 |
| SYT17     | 3,079496 | 7,51E-12 |
| LEPR      | 3,0787   | 0,000419 |
| PRRT3     | 3,07029  | 1,31E-05 |
| SLC9A2    | 3,067826 | 1,21E-24 |
| TRIM37    | 3,067492 | 9,83E-35 |
| MXD4      | 3,067295 | 1,83E-12 |
| SLC22A23  | 3,066029 | 1,03E-27 |
| ODAM      | 3,04524  | 4,34E-08 |
| RASGRF1   | 3,040461 | 1,01E-14 |
| KRBA2     | 3,027438 | 4,11E-05 |
| ACTL8     | 3,016977 | 0,000302 |
| FGD3      | 2,995601 | 2,85E-06 |

|           |          |          |
|-----------|----------|----------|
| ENKD1     | 2,988601 | 0,000571 |
| PRMT6     | 2,974717 | 1,61E-36 |
| C1QTNF9B  | 2,973895 | 1,48E-08 |
| LINC01116 | 2,970236 | 2,12E-05 |
| FAM102B   | 2,969715 | 3,48E-27 |
| C7orf13   | 2,967974 | 1,82E-10 |
| HEATR6    | 2,963007 | 3,25E-32 |
| SLC29A4   | 2,962819 | 3,35E-17 |
| MSRB2     | 2,962748 | 3,68E-16 |
| FAM46B    | 2,961937 | 1,80E-05 |
| HIST1H2BD | 2,938742 | 7,90E-07 |
| TUBB2B    | 2,93684  | 1,08E-08 |
| SRGAP2C   | 2,93017  | 8,17E-05 |
| PHLDB3    | 2,911173 | 3,23E-07 |
| KRT7      | 2,905324 | 7,20E-05 |
| GSTZ1     | 2,902976 | 1,64E-19 |
| LRRC75B   | 2,902641 | 4,05E-09 |
| NEURL1B   | 2,890767 | 9,38E-07 |
| COL1A1    | 2,886645 | 1,04E-07 |
| RNF122    | 2,884444 | 6,01E-10 |
| ADSSL1    | 2,880815 | 0,000631 |
| MEPCE     | 2,872996 | 1,05E-33 |
| TGFB3L    | 2,87132  | 0,000122 |
| DDB2      | 2,867714 | 7,79E-12 |
| MCTP1     | 2,865381 | 2,62E-07 |
| TRIQK     | 2,858281 | 6,27E-08 |
| POLD4     | 2,854896 | 2,17E-06 |
| METRN     | 2,845581 | 8,15E-20 |
| LINC01521 | 2,833603 | 1,02E-06 |
| ZNF217    | 2,831973 | 1,18E-20 |
| C15orf40  | 2,823084 | 4,25E-11 |
| ZNF253    | 2,819718 | 1,67E-13 |
| ZNF185    | 2,813847 | 1,08E-07 |
| IFI6      | 2,809785 | 8,81E-05 |
| MLPH      | 2,808749 | 3,70E-14 |
| SLC43A2   | 2,807535 | 2,42E-16 |
| ZNRF1     | 2,804153 | 3,41E-22 |
| LHX4      | 2,802788 | 7,20E-17 |
| LAGE3     | 2,802747 | 1,76E-21 |
| GGT1      | 2,801005 | 4,41E-13 |
| TUBD1     | 2,795148 | 1,93E-12 |
| IDH2      | 2,788991 | 6,50E-26 |
| SEMA3F    | 2,783946 | 1,60E-09 |
| TEAD2     | 2,783527 | 4,94E-14 |
| CASC10    | 2,782826 | 9,19E-05 |
| LOC100233 | 2,782714 | 5,09E-06 |
| CBLB      | 2,782369 | 1,81E-15 |
| ZNF137P   | 2,777477 | 0,000168 |
| TUBB3     | 2,774882 | 1,59E-27 |
| TFAP2A    | 2,773967 | 9,20E-24 |

|           |          |          |
|-----------|----------|----------|
| IGFLR1    | 2,772741 | 6,09E-07 |
| LTBP1     | 2,76104  | 2,43E-18 |
| CPS1      | 2,760692 | 9,23E-06 |
| CREB3L4   | 2,759025 | 1,47E-17 |
| MAML2     | 2,750403 | 0,000198 |
| RAB26     | 2,749224 | 0,000194 |
| SLC6A8    | 2,747768 | 8,41E-09 |
| PIK3R3    | 2,747598 | 1,04E-13 |
| GTF2IP1   | 2,744989 | 3,06E-09 |
| BCAS2     | 2,736996 | 4,17E-28 |
| ZNF841    | 2,735691 | 1,51E-10 |
| CKMT1A    | 2,734473 | 1,65E-13 |
| GATSL3    | 2,732449 | 0,00024  |
| MAPK11    | 2,729275 | 1,29E-06 |
| MYLIP     | 2,728572 | 3,48E-10 |
| RAB3D     | 2,727404 | 3,13E-14 |
| EFR3B     | 2,721988 | 5,26E-08 |
| BRSK1     | 2,721709 | 7,42E-05 |
| CABYR     | 2,705934 | 5,15E-05 |
| TNFRSF19  | 2,705738 | 1,22E-15 |
| NHP2      | 2,70191  | 1,08E-22 |
| KCNIP3    | 2,700377 | 0,000205 |
| PDGFA     | 2,694711 | 4,05E-05 |
| FZD2      | 2,686632 | 4,86E-09 |
| KLF7      | 2,685271 | 2,55E-09 |
| CTSO      | 2,681382 | 0,000901 |
| FAM213A   | 2,677698 | 1,55E-14 |
| SP6       | 2,675557 | 2,73E-11 |
| RPS27L    | 2,675198 | 3,26E-06 |
| PRR36     | 2,673963 | 3,34E-25 |
| ITPKB     | 2,673589 | 4,93E-12 |
| LAPTM4B   | 2,673011 | 5,17E-32 |
| ZNF75A    | 2,666803 | 6,00E-06 |
| RBBP8NL   | 2,660834 | 1,01E-10 |
| MOSPD3    | 2,658567 | 1,53E-10 |
| TMEM183F  | 2,657206 | 2,79E-09 |
| SLC27A5   | 2,655741 | 2,33E-13 |
| AHNAK2    | 2,654458 | 1,31E-06 |
| DTWD1     | 2,653744 | 3,79E-14 |
| PXN-AS1   | 2,644129 | 7,14E-08 |
| ZNF268    | 2,6282   | 1,05E-09 |
| APLP1     | 2,619917 | 1,86E-05 |
| HBP1      | 2,616732 | 1,09E-08 |
| DNLZ      | 2,61035  | 5,58E-11 |
| ADAM11    | 2,601448 | 4,23E-05 |
| COX6C     | 2,600954 | 1,98E-15 |
| CCDC92    | 2,582561 | 4,87E-07 |
| MRPS21    | 2,578293 | 6,02E-26 |
| KREMEN2   | 2,575645 | 6,82E-06 |
| GTF2IRD2B | 2,574951 | 5,03E-09 |

|           |          |          |
|-----------|----------|----------|
| C6orf52   | 2,566656 | 0,000886 |
| RAP2B     | 2,564386 | 4,18E-10 |
| KCTD1     | 2,561208 | 1,65E-12 |
| ZNF429    | 2,560384 | 1,36E-06 |
| RPS6KB1   | 2,547195 | 8,47E-27 |
| SHANK2    | 2,535575 | 1,53E-09 |
| KRT18     | 2,533286 | 1,79E-10 |
| ZBTB42    | 2,531107 | 2,70E-14 |
| FAM214A   | 2,51575  | 7,95E-06 |
| ADRA2C    | 2,515029 | 6,12E-07 |
| FZD1      | 2,514159 | 4,40E-10 |
| VGf       | 2,510396 | 2,04E-08 |
| CSDE1     | 2,507477 | 3,42E-22 |
| C9orf3    | 2,505908 | 1,69E-11 |
| SH3BGR    | 2,503648 | 3,77E-05 |
| HARS2     | 2,491896 | 1,57E-13 |
| DAAM1     | 2,486114 | 5,63E-17 |
| N4BP3     | 2,48438  | 7,43E-09 |
| ZNF480    | 2,483982 | 5,51E-16 |
| TRAPPC6A  | 2,48269  | 2,41E-07 |
| PACSIN3   | 2,475254 | 4,26E-21 |
| SBK1      | 2,474692 | 2,09E-21 |
| TNIK      | 2,469378 | 1,24E-06 |
| ATP9A     | 2,461277 | 3,91E-17 |
| RHOB      | 2,457521 | 6,73E-18 |
| NES       | 2,457435 | 9,14E-08 |
| PHLDA3    | 2,456692 | 1,57E-05 |
| FLJ23867  | 2,456412 | 2,46E-09 |
| CROT      | 2,443204 | 0,000108 |
| FAM222A   | 2,441327 | 5,78E-14 |
| LRRC24    | 2,439169 | 0,000709 |
| PNRC1     | 2,430847 | 5,81E-09 |
| ZNF432    | 2,425041 | 3,47E-06 |
| LOC148705 | 2,423091 | 0,000257 |
| TNKS2     | 2,422716 | 4,99E-15 |
| GPRIN1    | 2,422197 | 2,88E-18 |
| PVRL4     | 2,421639 | 7,23E-07 |
| FRAT2     | 2,416655 | 2,59E-05 |
| ERV3-1    | 2,404414 | 1,04E-06 |
| S100A13   | 2,403234 | 3,60E-15 |
| SYNE2     | 2,397411 | 1,13E-09 |
| MNX1-AS1  | 2,386837 | 5,52E-06 |
| ARSG      | 2,376597 | 4,34E-07 |
| SELENBP1  | 2,374701 | 3,54E-13 |
| ZFP14     | 2,37148  | 6,56E-07 |
| THOC7     | 2,367109 | 2,05E-23 |
| FRMD4A    | 2,365184 | 1,80E-06 |
| LOC104968 | 2,361978 | 1,29E-05 |
| NRP1      | 2,356551 | 1,38E-10 |
| PKP1      | 2,355715 | 0,0004   |

|           |          |          |
|-----------|----------|----------|
| MNS1      | 2,351588 | 1,06E-06 |
| CASKIN1   | 2,350682 | 3,95E-07 |
| POLR2J    | 2,348731 | 2,18E-14 |
| IRX3      | 2,339271 | 9,27E-15 |
| TFPT      | 2,335823 | 2,16E-09 |
| BCL6      | 2,334624 | 1,93E-09 |
| SPPL2A    | 2,324294 | 1,12E-19 |
| RNF223    | 2,324268 | 1,54E-05 |
| CLDN3     | 2,321568 | 6,66E-17 |
| IFT22     | 2,319629 | 2,26E-13 |
| TBCK      | 2,318156 | 1,02E-10 |
| CBX2      | 2,316004 | 3,05E-15 |
| PDCL3     | 2,313624 | 9,69E-15 |
| TMEM254   | 2,311588 | 7,85E-09 |
| PRKAR2B   | 2,304774 | 2,47E-05 |
| NME4      | 2,304597 | 4,54E-21 |
| KRT80     | 2,303699 | 2,60E-12 |
| RAC3      | 2,303222 | 1,08E-07 |
| WWTR1     | 2,301692 | 5,70E-13 |
| RGL1      | 2,30125  | 5,65E-05 |
| ARID5B    | 2,297072 | 8,95E-15 |
| ALKBH2    | 2,291298 | 3,03E-13 |
| DHTKD1    | 2,290889 | 1,12E-14 |
| EML1      | 2,282271 | 2,16E-13 |
| LOC100125 | 2,275918 | 6,32E-06 |
| TAGLN2    | 2,270945 | 3,46E-18 |
| RASA3     | 2,268366 | 0,000118 |
| PRMT2     | 2,267834 | 2,36E-07 |
| SOS2      | 2,264486 | 2,29E-08 |
| F12       | 2,261407 | 1,06E-16 |
| WNT7B     | 2,257137 | 3,97E-06 |
| DNAJC15   | 2,256914 | 3,17E-16 |
| ZSCAN2    | 2,256555 | 2,68E-12 |
| SUMO3     | 2,255926 | 7,16E-21 |
| ZNF425    | 2,255357 | 0,000282 |
| IMMP2L    | 2,250999 | 7,42E-06 |
| NINL      | 2,24891  | 4,44E-09 |
| WDR83OS   | 2,239316 | 1,14E-17 |
| CADM4     | 2,235474 | 9,08E-06 |
| LPPR2     | 2,233879 | 3,69E-06 |
| PAQR8     | 2,232041 | 0,000834 |
| PPFIA3    | 2,220904 | 2,58E-13 |
| ALDH4A1   | 2,218812 | 0,000187 |
| TMEM183   | 2,217742 | 1,31E-17 |
| RAB13     | 2,212687 | 3,35E-13 |
| TMEM168   | 2,211732 | 1,53E-14 |
| RAD51C    | 2,197182 | 3,13E-20 |
| EFHD1     | 2,185643 | 5,08E-06 |
| MSX2      | 2,185616 | 2,71E-09 |
| TLE3      | 2,182663 | 1,33E-18 |



|           |          |          |
|-----------|----------|----------|
| EFCAB11   | 2,181371 | 1,60E-08 |
| S100A11   | 2,177321 | 5,67E-09 |
| FUT8      | 2,174651 | 4,87E-12 |
| NXPH4     | 2,168293 | 3,13E-05 |
| TMTC2     | 2,157862 | 2,27E-05 |
| PPDPF     | 2,155907 | 7,23E-11 |
| LIPT2     | 2,155063 | 0,000293 |
| C7orf73   | 2,149084 | 6,62E-17 |
| RNASEL    | 2,148772 | 0,000245 |
| NHS       | 2,148158 | 9,92E-06 |
| RASSF8    | 2,147772 | 4,24E-07 |
| GOLGA7B   | 2,147141 | 0,00099  |
| EFNA4     | 2,145185 | 2,45E-12 |
| RRBP1     | 2,144279 | 1,71E-10 |
| ANKRD34A  | 2,142221 | 2,71E-06 |
| ZNF608    | 2,140031 | 2,84E-09 |
| ZNF444    | 2,136005 | 1,83E-12 |
| ROGDI     | 2,13581  | 1,38E-09 |
| MRPL41    | 2,133335 | 2,42E-15 |
| TRMT12    | 2,133202 | 2,07E-11 |
| IFT46     | 2,131964 | 4,58E-12 |
| PMS2P1    | 2,126042 | 1,96E-09 |
| NBPF15    | 2,122796 | 3,13E-09 |
| GABPB1-AS | 2,116376 | 1,30E-05 |
| TMEM187   | 2,11628  | 6,52E-06 |
| ERMP1     | 2,114961 | 3,20E-09 |
| HID1      | 2,112659 | 1,35E-06 |
| TRIM45    | 2,107145 | 7,75E-06 |
| MAFG-AS1  | 2,106106 | 9,45E-05 |
| TSPAN31   | 2,102939 | 6,38E-06 |
| TP53I11   | 2,101767 | 1,02E-05 |
| ZNF354A   | 2,101188 | 3,57E-08 |
| PMVK      | 2,096245 | 3,78E-09 |
| VTI1B     | 2,09518  | 1,24E-12 |
| MAPT      | 2,095157 | 3,93E-09 |
| ZBTB12    | 2,092676 | 3,35E-05 |
| LTBP3     | 2,092319 | 2,39E-13 |
| HSD17B8   | 2,085771 | 1,58E-05 |
| ZNF256    | 2,085482 | 0,000108 |
| OARD1     | 2,084344 | 6,60E-09 |
| ENTPD2    | 2,082333 | 2,91E-05 |
| KRT19     | 2,080534 | 1,04E-07 |
| TATDN1    | 2,079975 | 1,10E-14 |
| CRISPLD2  | 2,070953 | 3,33E-05 |
| ZNF703    | 2,070931 | 1,46E-13 |
| TMEM191   | 2,069816 | 1,28E-07 |
| TRIP6     | 2,067017 | 3,20E-13 |
| GRAMD1A   | 2,066487 | 1,55E-10 |
| GLMP      | 2,059114 | 2,35E-05 |
| PPP2R3A   | 2,057513 | 8,18E-08 |

|           |          |          |
|-----------|----------|----------|
| ABCA12    | 2,056278 | 1,85E-05 |
| TDRKH     | 2,055866 | 4,13E-07 |
| FKBP10    | 2,054801 | 2,74E-13 |
| WWP1      | 2,052467 | 5,21E-07 |
| CADM1     | 2,051976 | 1,08E-08 |
| DCXR      | 2,050427 | 8,82E-11 |
| HIST1H2BK | 2,050153 | 0,00053  |
| SARS2     | 2,046481 | 1,93E-12 |
| C17orf97  | 2,039945 | 1,28E-05 |
| DCLRE1B   | 2,03847  | 4,26E-10 |
| COQ2      | 2,036807 | 5,89E-10 |
| FAM89B    | 2,035774 | 2,82E-13 |
| CHD3      | 2,034377 | 2,23E-16 |
| RNF115    | 2,032703 | 1,41E-15 |
| MAST1     | 2,031765 | 0,00051  |
| HCFC1R1   | 2,029297 | 9,41E-13 |
| SYT7      | 2,028767 | 3,50E-10 |
| TMEM205   | 2,027776 | 2,47E-08 |
| SLC38A6   | 2,027433 | 0,000537 |
| OSR2      | 2,025339 | 0,000224 |
| ENDOV     | 2,021541 | 1,66E-08 |
| PRADC1    | 2,017269 | 2,36E-05 |
| NUDT1     | 2,017222 | 1,14E-08 |
| DBNDD1    | 2,014362 | 2,13E-07 |
| HKR1      | 2,013952 | 7,92E-06 |
| ECH1      | 2,012774 | 1,70E-10 |
| LOC101927 | 2,011551 | 0,00019  |
| SPIRE2    | 2,010604 | 0,000576 |
| SLC9A3R1  | 2,00879  | 6,37E-10 |
| ZSCAN21   | 2,007665 | 5,01E-07 |
| RMDN1     | 2,007334 | 9,61E-12 |
| DSP       | 2,005925 | 2,80E-16 |
| GNAS      | 2,005916 | 2,66E-18 |
| PVRL1     | 1,99673  | 3,68E-07 |
| SP5       | 1,995568 | 2,73E-09 |
| HMGB3     | 1,989702 | 5,09E-14 |
| IGF1R     | 1,987256 | 7,23E-14 |
| FBXW9     | 1,981539 | 1,30E-08 |
| IQCH-AS1  | 1,976484 | 1,48E-06 |
| LRBA      | 1,973738 | 3,91E-10 |
| ARL4A     | 1,970245 | 9,17E-13 |
| FIS1      | 1,970241 | 5,42E-12 |
| ACOX3     | 1,965444 | 8,36E-08 |
| THSD4     | 1,963101 | 6,91E-05 |
| ENY2      | 1,961198 | 5,38E-11 |
| LOC11323C | 1,95364  | 9,02E-06 |
| BCL2L1    | 1,953534 | 1,01E-09 |
| DNMT3B    | 1,952832 | 7,25E-08 |
| C21orf58  | 1,95129  | 0,000128 |
| DNMT3A    | 1,950203 | 4,31E-13 |

|           |          |          |
|-----------|----------|----------|
| SIPA1L2   | 1,949488 | 2,45E-08 |
| PACS1     | 1,948342 | 1,52E-09 |
| CTNNA1    | 1,944404 | 9,23E-13 |
| AGA       | 1,941804 | 0,000352 |
| MACROD1   | 1,941347 | 7,69E-08 |
| PTMS      | 1,939811 | 3,35E-06 |
| KCNJ8     | 1,93809  | 7,07E-10 |
| TMOD3     | 1,93042  | 2,42E-16 |
| SWI5      | 1,930162 | 6,18E-09 |
| ICAM3     | 1,928823 | 1,44E-05 |
| TP53INP2  | 1,922141 | 0,000325 |
| DUSP23    | 1,921157 | 1,24E-09 |
| SMTN      | 1,918715 | 1,79E-08 |
| ZNF362    | 1,91581  | 0,000295 |
| TIGD6     | 1,914343 | 0,000417 |
| CYB561    | 1,913291 | 5,69E-17 |
| BBS10     | 1,913109 | 3,63E-07 |
| NDUFB9    | 1,911369 | 3,16E-10 |
| ZNF45     | 1,907926 | 8,07E-05 |
| TBC1D7    | 1,904742 | 5,50E-08 |
| NRSN2-AS1 | 1,90197  | 0,000172 |
| TRAPPC2L  | 1,90124  | 1,28E-12 |
| TLCD1     | 1,899952 | 2,80E-11 |
| CINP      | 1,895453 | 7,81E-07 |
| RMND5B    | 1,893666 | 1,44E-12 |
| RABIF     | 1,890572 | 4,23E-08 |
| MAPK6     | 1,889076 | 2,36E-12 |
| CD44      | 1,883597 | 7,04E-09 |
| FRG1BP    | 1,882252 | 0,000126 |
| CDH3      | 1,882009 | 5,08E-16 |
| TET2      | 1,881772 | 2,40E-11 |
| RNF44     | 1,879093 | 9,07E-12 |
| EPHB4     | 1,878455 | 1,92E-11 |
| RAB1B     | 1,875401 | 1,48E-07 |
| ATMIN     | 1,873042 | 6,19E-15 |
| TRMT2B    | 1,872815 | 7,49E-09 |
| SOX13     | 1,868772 | 2,16E-05 |
| SRGAP2    | 1,867643 | 4,08E-13 |
| SLC39A4   | 1,867285 | 5,56E-05 |
| TPD52L1   | 1,866376 | 9,31E-07 |
| CCDC90B   | 1,866257 | 5,03E-09 |
| KANSL1L   | 1,86337  | 1,70E-05 |
| ZMAT2     | 1,861309 | 3,61E-13 |
| CLU       | 1,860595 | 3,97E-06 |
| NBPF3     | 1,8582   | 0,000286 |
| MGMT      | 1,856061 | 9,75E-07 |
| PCOLCE    | 1,855709 | 0,000867 |
| AP4E1     | 1,853515 | 2,65E-09 |
| SNRPE     | 1,852026 | 4,73E-15 |
| ICK       | 1,847171 | 1,17E-10 |

|          |          |          |
|----------|----------|----------|
| NRAS     | 1,844342 | 5,50E-10 |
| MYL12A   | 1,840874 | 8,75E-14 |
| CCDC167  | 1,839764 | 3,56E-05 |
| TAOK3    | 1,839699 | 1,75E-09 |
| SLC2A4RG | 1,837495 | 5,63E-12 |
| TRIB1    | 1,837122 | 6,18E-08 |
| ZKSCAN1  | 1,830122 | 1,44E-07 |
| MIR3654  | 1,828134 | 2,73E-06 |
| ZSCAN16  | 1,825506 | 2,87E-05 |
| VPS72    | 1,824846 | 4,77E-07 |
| SMKR1    | 1,824638 | 0,000181 |
| KNOP1    | 1,818542 | 2,63E-12 |
| APRT     | 1,813793 | 4,09E-15 |
| SH3BP5   | 1,804929 | 6,10E-12 |
| CPLX1    | 1,802996 | 0,000162 |
| MTCH1    | 1,801262 | 3,47E-13 |
| NELFCD   | 1,800225 | 9,31E-10 |
| ACOT13   | 1,798676 | 7,91E-08 |
| ATP6V0E2 | 1,79801  | 1,17E-06 |
| TM7SF2   | 1,797482 | 0,00024  |
| ZNF117   | 1,797461 | 0,000381 |
| DECR1    | 1,796917 | 5,26E-09 |
| PDE4DIP  | 1,796274 | 1,50E-06 |
| GPR89A   | 1,793741 | 2,24E-05 |
| ZFP1     | 1,792998 | 3,23E-07 |
| ZNF713   | 1,790172 | 0,000171 |
| STRADB   | 1,788542 | 1,12E-06 |
| DTD1     | 1,787222 | 1,25E-09 |
| FLYWCH2  | 1,787064 | 1,10E-07 |
| PVT1     | 1,785883 | 7,39E-06 |
| TAF11    | 1,782188 | 4,18E-09 |
| NMB      | 1,781585 | 0,000632 |
| ATXN7L3B | 1,7778   | 1,24E-12 |
| CPT1A    | 1,772883 | 3,92E-09 |
| HSPB1    | 1,77105  | 8,61E-06 |
| TMED3    | 1,768335 | 2,79E-10 |
| SLC25A13 | 1,76752  | 2,20E-05 |
| PAK4     | 1,767322 | 1,04E-10 |
| SYAP1    | 1,764188 | 9,51E-11 |
| ARMCX6   | 1,763829 | 1,58E-07 |
| MARCKSL1 | 1,763008 | 1,59E-07 |
| ZNF14    | 1,761375 | 0,00016  |
| SSNA1    | 1,756858 | 1,14E-08 |
| KITLG    | 1,755231 | 3,03E-09 |
| PRUNE    | 1,751543 | 1,68E-10 |
| RBM8A    | 1,749949 | 2,26E-12 |
| TMEM64   | 1,748295 | 3,77E-11 |
| DUS4L    | 1,747943 | 2,06E-07 |
| SLC27A3  | 1,746367 | 2,36E-09 |
| ANKRD50  | 1,741919 | 2,24E-09 |

|            |          |          |
|------------|----------|----------|
| ULK1       | 1,731917 | 5,96E-10 |
| ZNF3       | 1,730934 | 5,62E-10 |
| SIRT5      | 1,729687 | 1,14E-07 |
| ISOC2      | 1,727203 | 5,27E-12 |
| NSMCE2     | 1,727129 | 7,57E-07 |
| GALK1      | 1,727076 | 6,31E-07 |
| ALG8       | 1,726595 | 5,26E-06 |
| HILPDA     | 1,725214 | 3,60E-05 |
| ZNF252P    | 1,723638 | 2,32E-06 |
| SKIL       | 1,720442 | 1,96E-06 |
| TRIM24     | 1,719404 | 5,06E-10 |
| SLC25A29   | 1,716929 | 1,06E-06 |
| RP9        | 1,715468 | 3,64E-05 |
| ZNF688     | 1,714818 | 8,07E-05 |
| ZNHIT1     | 1,711899 | 1,87E-05 |
| ZMYND8     | 1,711583 | 8,58E-12 |
| NUDT3      | 1,711059 | 7,12E-06 |
| PLCG1      | 1,701562 | 2,43E-07 |
| STMN3      | 1,695797 | 7,34E-06 |
| AUTS2      | 1,69509  | 1,16E-06 |
| FAM3A      | 1,693207 | 6,84E-09 |
| ALKBH4     | 1,693076 | 1,21E-08 |
| SAP130     | 1,692883 | 1,46E-12 |
| EPN3       | 1,692016 | 0,001005 |
| SRR        | 1,690589 | 6,54E-05 |
| LOC283333E | 1,689649 | 0,000245 |
| RASA1      | 1,687862 | 2,19E-07 |
| POLR3C     | 1,684216 | 0,000372 |
| LEO1       | 1,684209 | 3,93E-12 |
| FLJ10038   | 1,684156 | 5,79E-06 |
| FOXP1      | 1,68414  | 9,56E-08 |
| SSR2       | 1,683082 | 1,81E-09 |
| LYSMD1     | 1,680265 | 4,04E-06 |
| TC2N       | 1,679785 | 1,10E-05 |
| C14orf80   | 1,679031 | 1,17E-08 |
| ZNF83      | 1,677902 | 2,96E-06 |
| SLC7A5     | 1,67754  | 2,48E-09 |
| LAMTOR4    | 1,672706 | 2,26E-10 |
| RAB15      | 1,671831 | 1,69E-08 |
| LINC01184  | 1,671599 | 0,000736 |
| RSU1       | 1,667938 | 4,19E-09 |
| CMC2       | 1,665218 | 6,02E-08 |
| TSPAN17    | 1,656475 | 1,23E-08 |
| PPIC       | 1,655154 | 2,67E-08 |
| OAZ2       | 1,653797 | 1,11E-07 |
| LY6E       | 1,65279  | 2,76E-06 |
| CFDP1      | 1,652138 | 1,17E-09 |
| CALHM2     | 1,65192  | 0,000722 |
| SAYSD1     | 1,65137  | 1,26E-08 |
| CHD6       | 1,649441 | 1,14E-11 |

|           |          |          |
|-----------|----------|----------|
| CACFD1    | 1,648334 | 0,000992 |
| ELMO3     | 1,64724  | 2,52E-06 |
| ERGIC1    | 1,646394 | 1,47E-08 |
| DENND2D   | 1,64608  | 9,45E-06 |
| JUP       | 1,646069 | 8,99E-05 |
| DZIP3     | 1,646068 | 3,85E-05 |
| ATXN7L1   | 1,64537  | 6,21E-05 |
| SEPW1     | 1,642209 | 2,96E-06 |
| PFN2      | 1,640737 | 1,32E-09 |
| REEP6     | 1,639353 | 0,000505 |
| ZFP30     | 1,637171 | 0,000573 |
| STOM      | 1,637096 | 3,19E-06 |
| CORO1B    | 1,634126 | 2,71E-05 |
| COA3      | 1,63393  | 1,63E-05 |
| ACBD7     | 1,631314 | 0,000143 |
| PSMD4     | 1,629802 | 7,99E-13 |
| FBXO31    | 1,629706 | 1,35E-09 |
| SF3B4     | 1,626249 | 1,23E-12 |
| ADCK1     | 1,626092 | 4,32E-05 |
| HPS1      | 1,624647 | 9,70E-09 |
| PCSK6     | 1,623689 | 2,43E-05 |
| ZNF100    | 1,620059 | 5,87E-06 |
| TMBIM4    | 1,620017 | 1,61E-07 |
| ZNF138    | 1,615362 | 0,000102 |
| ZNF808    | 1,610017 | 0,000678 |
| SERPINB6  | 1,608198 | 1,63E-10 |
| TJP3      | 1,607084 | 0,000594 |
| TMEM132A  | 1,605105 | 3,07E-05 |
| SHFM1     | 1,603245 | 1,30E-10 |
| AP4M1     | 1,603197 | 2,57E-06 |
| CETN2     | 1,601569 | 5,70E-07 |
| IQCK      | 1,600595 | 2,94E-05 |
| C7orf50   | 1,599733 | 2,30E-07 |
| SLC25A23  | 1,595741 | 7,22E-05 |
| ZNF212    | 1,595411 | 6,09E-06 |
| DLGAP5    | 1,594849 | 2,09E-10 |
| RNF130    | 1,594734 | 8,64E-07 |
| RGL2      | 1,594456 | 3,99E-08 |
| SNAPC5    | 1,593746 | 4,27E-06 |
| ATP5G2    | 1,592682 | 7,07E-09 |
| VIPAS39   | 1,591401 | 1,34E-07 |
| SEMA4C    | 1,58843  | 9,79E-07 |
| HMG20B    | 1,58813  | 1,51E-11 |
| UBL3      | 1,586849 | 1,55E-06 |
| NUCKS1    | 1,586718 | 1,28E-10 |
| LINC00674 | 1,586662 | 1,31E-07 |
| MMAB      | 1,582781 | 2,43E-05 |
| KBTBD7    | 1,580852 | 0,000145 |
| PSD4      | 1,580091 | 0,00014  |
| NDUFAF6   | 1,579547 | 5,52E-07 |

|          |          |          |
|----------|----------|----------|
| S100A10  | 1,578931 | 1,65E-09 |
| THOC6    | 1,573561 | 7,56E-05 |
| NDST1    | 1,572874 | 6,29E-08 |
| AP5S1    | 1,572587 | 4,28E-05 |
| LAMTOR2  | 1,572064 | 6,94E-08 |
| HDDC3    | 1,571566 | 0,000335 |
| AGAP2    | 1,571229 | 0,000265 |
| KARS     | 1,567462 | 5,14E-10 |
| GNB2     | 1,560267 | 3,29E-10 |
| ARPC1A   | 1,559848 | 1,11E-08 |
| KLHDC3   | 1,556414 | 9,02E-06 |
| CGN      | 1,555884 | 8,13E-06 |
| ENSA     | 1,555873 | 3,60E-11 |
| BOD1     | 1,554741 | 4,11E-06 |
| TRIM33   | 1,55451  | 3,94E-09 |
| ZDHC12   | 1,554084 | 1,26E-06 |
| PARD6B   | 1,55392  | 7,55E-07 |
| ATP5J2   | 1,553045 | 8,80E-06 |
| IRX5     | 1,552275 | 8,65E-07 |
| SMARCD2  | 1,551821 | 2,33E-10 |
| GSTK1    | 1,551699 | 5,46E-06 |
| C20orf27 | 1,548047 | 1,73E-09 |
| SOX12    | 1,545968 | 6,35E-10 |
| XXYL1    | 1,545358 | 9,81E-08 |
| ARF5     | 1,544873 | 4,40E-11 |
| TMEM65   | 1,544523 | 1,24E-05 |
| PCYOX1L  | 1,543677 | 0,000235 |
| FRS2     | 1,543117 | 3,21E-05 |
| SERPINH1 | 1,540437 | 1,28E-08 |
| ARMC10   | 1,535981 | 9,15E-09 |
| DHX40    | 1,535341 | 1,96E-08 |
| GATSL2   | 1,534871 | 2,73E-05 |
| MIS18BP1 | 1,533675 | 0,000109 |
| PMF1     | 1,53324  | 0,000445 |
| PRDM4    | 1,532467 | 8,28E-11 |
| CCDC85B  | 1,532187 | 6,29E-08 |
| MRPS11   | 1,530392 | 6,50E-06 |
| TSC22D1  | 1,529458 | 4,33E-05 |
| SH2B2    | 1,528365 | 0,000179 |
| GTF3A    | 1,527449 | 9,58E-10 |
| MYO5C    | 1,52727  | 1,11E-07 |
| TPBG     | 1,525621 | 4,46E-09 |
| DHFRL1   | 1,522798 | 0,000542 |
| CAMK2N2  | 1,521959 | 0,000471 |
| POGZ     | 1,52126  | 2,10E-05 |
| BANF1    | 1,520673 | 5,36E-08 |
| DARS2    | 1,520461 | 3,64E-09 |
| TRAK2    | 1,520369 | 1,36E-09 |
| PRKAG1   | 1,518826 | 2,71E-06 |
| TGIF2    | 1,513994 | 6,96E-05 |

|          |          |          |
|----------|----------|----------|
| NUDT4    | 1,513296 | 1,25E-06 |
| DYNLL2   | 1,512896 | 6,56E-10 |
| DDX41    | 1,512372 | 8,34E-10 |
| CDC42SE1 | 1,510759 | 1,85E-08 |
| SLC39A11 | 1,508769 | 0,000581 |
| ALDH6A1  | 1,506708 | 6,50E-06 |
| ZDHHC4   | 1,505008 | 8,22E-08 |
| FOXA1    | 1,503545 | 8,81E-06 |
| PIAS3    | 1,503231 | 6,60E-05 |
| STRA13   | 1,502125 | 6,16E-09 |
| ROMO1    | 1,501414 | 4,07E-08 |
| MTIF3    | 1,499693 | 1,58E-05 |
| ARPC5    | 1,498993 | 2,85E-07 |
| CYB5R4   | 1,498339 | 0,000367 |
| KIF20A   | 1,496801 | 1,48E-07 |
| NPDC1    | 1,496212 | 4,69E-09 |
| MYL12B   | 1,495802 | 2,96E-10 |
| TEAD3    | 1,495619 | 4,87E-06 |
| ZNF184   | 1,495085 | 8,42E-06 |
| AP1S1    | 1,494236 | 0,000232 |
| TMEM14C  | 1,49352  | 2,42E-07 |
| PLEKHH1  | 1,493398 | 1,05E-05 |
| FTSJ3    | 1,492916 | 6,03E-07 |
| AP2M1    | 1,489768 | 2,72E-07 |
| CDK2AP1  | 1,488986 | 3,57E-06 |
| EPHB3    | 1,488797 | 0,000511 |
| C11orf73 | 1,488326 | 1,87E-06 |
| LEF1     | 1,487925 | 3,06E-05 |
| ZNF687   | 1,486911 | 1,21E-06 |
| SLC37A4  | 1,485137 | 2,18E-08 |
| KIF3C    | 1,483792 | 5,16E-05 |
| FAM220A  | 1,480749 | 1,87E-05 |
| FAH      | 1,479959 | 3,73E-07 |
| USP8     | 1,478667 | 2,48E-09 |
| CFL1     | 1,47562  | 5,61E-10 |
| DHODH    | 1,47429  | 9,43E-05 |
| CABLES2  | 1,473742 | 5,39E-06 |
| ALDH7A1  | 1,47281  | 6,70E-05 |
| EBAG9    | 1,471962 | 0,00069  |
| BRMS1    | 1,471396 | 4,35E-07 |
| ZP3      | 1,470608 | 5,48E-05 |
| TMEM14B  | 1,466997 | 5,95E-06 |
| RPA3     | 1,465328 | 5,86E-05 |
| EFNA3    | 1,465323 | 9,91E-05 |
| RNF208   | 1,465078 | 0,000445 |
| TMEM19   | 1,464553 | 3,48E-05 |
| FUNDC2   | 1,463222 | 2,32E-07 |
| MCTS2P   | 1,462279 | 0,000263 |
| GCNT1    | 1,459077 | 6,76E-05 |
| SSH3     | 1,458788 | 1,04E-05 |



|           |          |          |
|-----------|----------|----------|
| KLHDC2    | 1,457662 | 0,000119 |
| CHCHD5    | 1,456325 | 3,62E-06 |
| DPAGT1    | 1,45618  | 1,79E-07 |
| IGFBP2    | 1,455861 | 1,56E-05 |
| RALBP1    | 1,455718 | 5,09E-06 |
| HIPK1     | 1,452752 | 8,34E-09 |
| C19orf43  | 1,450269 | 1,74E-10 |
| OPN3      | 1,449698 | 0,00063  |
| VMP1      | 1,448862 | 1,39E-07 |
| CHMP1B    | 1,44855  | 1,29E-06 |
| WDR83     | 1,448217 | 7,67E-05 |
| ZNF783    | 1,447238 | 0,000192 |
| PSMC2     | 1,446198 | 2,31E-09 |
| ATG10     | 1,44546  | 0,000393 |
| IFI30     | 1,445103 | 0,000972 |
| ZFHX3     | 1,44415  | 1,04E-07 |
| GLCE      | 1,443857 | 1,58E-06 |
| S100A16   | 1,437603 | 0,000649 |
| NSUN5     | 1,436811 | 1,89E-07 |
| POLR2K    | 1,435845 | 7,47E-05 |
| WDYHV1    | 1,434975 | 0,00034  |
| NDUFS6    | 1,434618 | 2,80E-08 |
| CBLL1     | 1,434316 | 1,90E-06 |
| ARPC1B    | 1,433311 | 5,64E-05 |
| C14orf2   | 1,432212 | 3,23E-07 |
| MRPS25    | 1,427624 | 6,21E-06 |
| MED20     | 1,426984 | 1,91E-05 |
| TACO1     | 1,424266 | 7,43E-09 |
| BCL2L11   | 1,421284 | 2,31E-05 |
| GTF3C1    | 1,419382 | 0,000172 |
| MRPL11    | 1,417368 | 1,51E-08 |
| GABPB1    | 1,417232 | 5,21E-05 |
| CLTB      | 1,416306 | 0,000121 |
| CENPBD1   | 1,41406  | 9,70E-05 |
| RPL26L1   | 1,412569 | 2,26E-06 |
| RNASEH2A  | 1,411899 | 4,17E-08 |
| DST       | 1,409972 | 1,67E-05 |
| IFT43     | 1,409263 | 0,000696 |
| GADD45GII | 1,406851 | 0,000135 |
| BMPR2     | 1,405259 | 2,16E-05 |
| CASP6     | 1,404595 | 5,27E-05 |
| RUSC1     | 1,402595 | 1,75E-05 |
| GCSH      | 1,402429 | 1,86E-05 |
| APH1A     | 1,402396 | 1,28E-08 |
| GDE1      | 1,401497 | 5,63E-07 |
| PTTG1IP   | 1,400315 | 1,41E-07 |
| MAN2B1    | 1,399451 | 3,00E-06 |
| PRELID1   | 1,398    | 1,35E-08 |
| COX4I1    | 1,397132 | 6,50E-10 |
| LAMTOR1   | 1,396515 | 1,65E-06 |

|         |          |          |
|---------|----------|----------|
| TTC37   | 1,395108 | 1,40E-07 |
| NDUFV3  | 1,394474 | 6,06E-08 |
| NIT2    | 1,393886 | 2,70E-05 |
| BUD31   | 1,393354 | 8,50E-07 |
| DHX38   | 1,390368 | 3,11E-08 |
| SRD5A3  | 1,389638 | 0,000396 |
| VKORC1  | 1,386069 | 4,50E-05 |
| NCK2    | 1,38535  | 1,73E-07 |
| TDP1    | 1,385165 | 5,09E-06 |
| TRIAP1  | 1,385114 | 2,46E-05 |
| JARID2  | 1,384885 | 1,81E-05 |
| ABHD16A | 1,384027 | 1,23E-06 |
| SKAP2   | 1,381881 | 0,000132 |
| FAM53B  | 1,379555 | 3,86E-08 |
| ASNA1   | 1,379471 | 6,35E-08 |
| DSTN    | 1,379283 | 1,99E-05 |
| JTB     | 1,37885  | 3,34E-08 |
| DGKZ    | 1,378243 | 3,30E-07 |
| AIF1L   | 1,376792 | 0,000184 |
| POLR3GL | 1,376176 | 9,83E-05 |
| RTFDC1  | 1,374814 | 6,51E-07 |
| MBTD1   | 1,373782 | 0,000537 |
| RNF5    | 1,372982 | 3,93E-05 |
| ACVR1   | 1,372388 | 0,000879 |
| ADI1    | 1,370919 | 3,14E-06 |
| ZSWIM7  | 1,370191 | 0,000245 |
| RPS3    | 1,36878  | 1,60E-06 |
| AKT1    | 1,367573 | 1,97E-05 |
| NKD1    | 1,366446 | 2,13E-05 |
| DHPS    | 1,365302 | 1,29E-06 |
| GIN52   | 1,365284 | 6,56E-07 |
| SELT    | 1,364909 | 1,24E-05 |
| TANC2   | 1,360954 | 0,00018  |
| TRPM7   | 1,360692 | 2,20E-08 |
| DGCR6L  | 1,360529 | 0,000122 |
| SLC35B2 | 1,36049  | 1,92E-05 |
| AIMP2   | 1,359893 | 1,10E-07 |
| ATAD2B  | 1,359441 | 0,000695 |
| RPL13   | 1,359132 | 9,31E-06 |
| RFWD2   | 1,358824 | 2,02E-05 |
| SIKE1   | 1,354744 | 1,01E-07 |
| PACS2   | 1,352482 | 1,98E-06 |
| GPATCH2 | 1,352078 | 4,66E-06 |
| TTLL5   | 1,349355 | 5,60E-07 |
| COIL    | 1,348032 | 0,000611 |
| LNX2    | 1,347407 | 2,30E-07 |
| RHPN1   | 1,346807 | 0,00035  |
| UQCR10  | 1,344894 | 1,63E-05 |
| PRR11   | 1,344288 | 8,98E-08 |
| NGFRAP1 | 1,344239 | 2,76E-08 |

|          |          |          |
|----------|----------|----------|
| NIPSNAP1 | 1,344148 | 5,96E-07 |
| H2AFY2   | 1,343632 | 7,99E-05 |
| GRK6     | 1,342062 | 3,23E-08 |
| PDCD10   | 1,341621 | 2,11E-06 |
| ZNF277   | 1,341428 | 1,94E-05 |
| ZNF254   | 1,340404 | 0,000787 |
| COX5B    | 1,339662 | 1,37E-08 |
| NT5DC2   | 1,339046 | 4,12E-05 |
| SETDB1   | 1,338272 | 1,60E-06 |
| APOA1BP  | 1,337954 | 1,66E-06 |
| MEST     | 1,335147 | 0,000113 |
| BRK1     | 1,334614 | 4,19E-07 |
| ZNF260   | 1,334612 | 0,000406 |
| ZFYVE21  | 1,333625 | 1,46E-05 |
| AURKA    | 1,333085 | 3,56E-06 |
| CYTH2    | 1,332201 | 1,69E-06 |
| ZNF84    | 1,331238 | 0,000996 |
| BLVRA    | 1,3311   | 3,07E-05 |
| POLR2I   | 1,330165 | 4,08E-07 |
| PIGG     | 1,327631 | 3,33E-05 |
| COPS6    | 1,327035 | 2,19E-07 |
| EXOC1    | 1,3246   | 2,90E-05 |
| RALGAPA1 | 1,324586 | 1,21E-05 |
| FMR1     | 1,321168 | 0,000196 |
| SPTLC2   | 1,320757 | 2,64E-06 |
| SNX27    | 1,319485 | 5,82E-06 |
| OST4     | 1,319435 | 5,75E-07 |
| MDH2     | 1,319073 | 1,90E-06 |
| NGRN     | 1,317234 | 5,30E-06 |
| FARSA    | 1,316821 | 1,54E-05 |
| MESDC2   | 1,316708 | 2,79E-05 |
| PAN2     | 1,315214 | 0,000773 |
| SIVA1    | 1,313283 | 1,64E-05 |
| WRB      | 1,310531 | 7,95E-05 |
| H3F3B    | 1,310114 | 6,72E-08 |
| HIGD2A   | 1,307718 | 5,95E-08 |
| ZNF766   | 1,306582 | 9,63E-05 |
| ESD      | 1,30632  | 3,69E-07 |
| SETMAR   | 1,305597 | 9,91E-05 |
| C2orf68  | 1,305094 | 2,86E-06 |
| HSBP1    | 1,304965 | 1,02E-05 |
| MYBL2    | 1,302929 | 2,26E-07 |
| VPS28    | 1,302163 | 6,01E-05 |
| CNPY3    | 1,298069 | 1,45E-05 |
| C1orf43  | 1,297412 | 1,23E-05 |
| WBSCR16  | 1,296791 | 2,47E-07 |
| MAP3K11  | 1,296594 | 0,000433 |
| ATP6V0E1 | 1,29556  | 0,00098  |
| AHCY     | 1,295296 | 1,15E-05 |
| MRPL9    | 1,293491 | 0,000123 |

|          |          |          |
|----------|----------|----------|
| MPND     | 1,290693 | 0,000291 |
| MED21    | 1,286018 | 7,07E-05 |
| RNF181   | 1,284658 | 7,10E-06 |
| AARS     | 1,284502 | 0,000167 |
| LCMT1    | 1,282021 | 7,80E-06 |
| COG4     | 1,277985 | 0,000254 |
| SRPK2    | 1,277903 | 2,50E-06 |
| CENPB    | 1,277733 | 2,04E-07 |
| C5orf30  | 1,274516 | 1,27E-05 |
| THAP11   | 1,273865 | 0,000246 |
| GSE1     | 1,272802 | 7,22E-08 |
| UBAC1    | 1,272376 | 0,000258 |
| SPATA33  | 1,271571 | 0,000123 |
| ADAT1    | 1,270524 | 2,74E-05 |
| BCAP31   | 1,27044  | 7,22E-06 |
| GRN      | 1,26936  | 0,000576 |
| EMC3     | 1,267426 | 0,000182 |
| HMGN1    | 1,264795 | 2,57E-07 |
| PHKG2    | 1,263413 | 1,20E-05 |
| COX14    | 1,262372 | 0,000328 |
| ATL3     | 1,26112  | 0,000599 |
| EIF4EBP2 | 1,260735 | 0,000177 |
| LAMA5    | 1,260208 | 8,25E-06 |
| RGS12    | 1,260175 | 0,000396 |
| ZMYM2    | 1,260086 | 1,36E-06 |
| TIMM22   | 1,257512 | 3,16E-05 |
| CRTC2    | 1,256069 | 0,000137 |
| RPP40    | 1,255635 | 0,000287 |
| CMAS     | 1,255568 | 0,000914 |
| C7orf26  | 1,254996 | 4,52E-06 |
| BACE2    | 1,254208 | 0,000134 |
| RSBN1    | 1,252278 | 5,53E-05 |
| TMEM251  | 1,252257 | 8,42E-05 |
| ARF3     | 1,250908 | 1,61E-06 |
| ANAPC15  | 1,249364 | 1,23E-05 |
| MRPL24   | 1,248046 | 2,07E-05 |
| LAMC1    | 1,24658  | 1,98E-06 |
| CELSR2   | 1,244061 | 0,000108 |
| MLYCD    | 1,24341  | 0,000746 |
| MTA2     | 1,243198 | 9,90E-08 |
| ZBTB22   | 1,241316 | 0,000296 |
| LARS     | 1,238296 | 9,27E-07 |
| ORAI2    | 1,23723  | 0,000349 |
| RPS19    | 1,236402 | 3,79E-05 |
| MIF-AS1  | 1,236058 | 0,00068  |
| NDUFB10  | 1,235767 | 4,15E-06 |
| SAMM50   | 1,235704 | 3,35E-05 |
| NDUFB5   | 1,232291 | 0,000223 |
| DPP3     | 1,2298   | 4,87E-05 |
| INTS8    | 1,22836  | 0,00021  |

|          |          |          |
|----------|----------|----------|
| COA5     | 1,227784 | 0,000822 |
| TMEM258  | 1,227226 | 0,000118 |
| OS9      | 1,226403 | 6,95E-05 |
| PSMC5    | 1,225546 | 1,19E-05 |
| SCFD1    | 1,22424  | 8,82E-06 |
| VPS25    | 1,223984 | 1,73E-05 |
| MRPL43   | 1,222613 | 0,000224 |
| GRB14    | 1,222008 | 0,000627 |
| NCBP2    | 1,221931 | 2,09E-05 |
| SMURF1   | 1,221565 | 4,05E-06 |
| MAF1     | 1,220407 | 3,18E-05 |
| LMAN2    | 1,219491 | 2,00E-06 |
| TMEM179f | 1,219289 | 0,000213 |
| ZNF786   | 1,216019 | 7,34E-05 |
| CALM1    | 1,215794 | 5,09E-05 |
| ZNF219   | 1,215723 | 0,00014  |
| OTUD7B   | 1,215561 | 7,67E-06 |
| SPTBN2   | 1,215306 | 0,000183 |
| TOMM6    | 1,215075 | 3,95E-06 |
| RBBP9    | 1,213898 | 9,91E-05 |
| LPAR2    | 1,21355  | 1,35E-05 |
| NTPCR    | 1,213198 | 0,000974 |
| SRA1     | 1,212915 | 0,000277 |
| XPOT     | 1,21009  | 0,00051  |
| HDGF     | 1,209846 | 4,35E-07 |
| ZKSCAN5  | 1,209579 | 5,41E-05 |
| COX7C    | 1,208263 | 5,34E-07 |
| ZSWIM6   | 1,205826 | 0,000591 |
| ACTB     | 1,205266 | 0,000721 |
| TARBP2   | 1,204911 | 1,67E-05 |
| NUBP2    | 1,204729 | 3,97E-06 |
| C8orf82  | 1,204075 | 0,000153 |
| DBI      | 1,201064 | 3,79E-06 |
| TXNDC9   | 1,200953 | 7,22E-05 |
| NOTCH1   | 1,200526 | 0,000506 |
| RNF7     | 1,200464 | 2,84E-05 |
| GLRX5    | 1,20009  | 5,51E-05 |
| DECR2    | 1,199137 | 0,000246 |
| C17orf62 | 1,1989   | 9,27E-06 |
| UBE2T    | 1,196232 | 3,63E-05 |
| PKP3     | 1,194493 | 0,000179 |
| NPC1     | 1,19418  | 0,000103 |
| SNAPIN   | 1,194143 | 0,00014  |
| IKBKG    | 1,193949 | 0,000462 |
| TK1      | 1,193755 | 2,47E-06 |
| RPL30    | 1,193488 | 0,000441 |
| RALGDS   | 1,192964 | 5,59E-05 |
| DLD      | 1,192833 | 0,000307 |
| SPG21    | 1,191417 | 6,43E-06 |
| AP4B1    | 1,189196 | 0,000149 |

|           |          |          |
|-----------|----------|----------|
| MTSS1L    | 1,188545 | 0,000489 |
| OTUB1     | 1,186435 | 4,39E-06 |
| TTC9      | 1,185091 | 0,00012  |
| RNMTL1    | 1,184387 | 0,000274 |
| SLC25A43  | 1,184275 | 8,40E-05 |
| NRBP1     | 1,184218 | 0,00018  |
| DERL1     | 1,182861 | 0,00029  |
| ETFA      | 1,182622 | 0,000248 |
| AGAP2-AS1 | 1,18212  | 0,00079  |
| SART1     | 1,182043 | 2,09E-06 |
| PSMD7     | 1,180327 | 5,66E-07 |
| FAHD1     | 1,176774 | 0,000677 |
| PBX2      | 1,174574 | 3,14E-05 |
| ENDOG     | 1,17257  | 0,000368 |
| CYC1      | 1,172103 | 3,40E-06 |
| ECSIT     | 1,171856 | 1,84E-05 |
| TAF6      | 1,16885  | 9,38E-06 |
| ARPP19    | 1,168735 | 1,25E-06 |
| PSMB4     | 1,168592 | 9,40E-06 |
| ABHD12    | 1,168127 | 3,75E-05 |
| MCM7      | 1,168112 | 1,96E-05 |
| EEF1G     | 1,167794 | 3,18E-06 |
| POLE4     | 1,16727  | 0,000758 |
| CKAP5     | 1,166864 | 3,81E-05 |
| ATP5H     | 1,166786 | 1,59E-05 |
| ZNF398    | 1,16614  | 7,22E-06 |
| RSRC1     | 1,164172 | 0,000112 |
| PRDX2     | 1,163858 | 1,18E-05 |
| CD47      | 1,163344 | 0,0001   |
| TMEM9     | 1,161836 | 5,21E-05 |
| TRIM26    | 1,161092 | 2,50E-05 |
| YIF1A     | 1,159888 | 2,16E-05 |
| ATP5B     | 1,157275 | 7,50E-06 |
| SMG7      | 1,154996 | 1,41E-06 |
| PAFAH1B3  | 1,154149 | 1,76E-05 |
| MFSD3     | 1,153696 | 6,63E-05 |
| SNRPF     | 1,153479 | 0,000273 |
| CDC25B    | 1,151957 | 0,000461 |
| MZT2B     | 1,150337 | 0,000207 |
| KMT2E     | 1,14956  | 5,89E-05 |
| FLOT2     | 1,148721 | 9,53E-05 |
| RPRD2     | 1,147184 | 5,90E-05 |
| CDK5      | 1,146184 | 0,000277 |
| SEC11A    | 1,144002 | 1,15E-06 |
| MEA1      | 1,142537 | 5,54E-06 |
| ESYT2     | 1,140929 | 4,47E-06 |
| PAAF1     | 1,139943 | 9,14E-05 |
| COX6A1    | 1,138598 | 1,89E-06 |
| UBTD2     | 1,137363 | 7,74E-05 |
| MREG      | 1,137184 | 0,000246 |

|          |          |          |
|----------|----------|----------|
| SLC44A2  | 1,134676 | 0,00036  |
| RUFY1    | 1,133205 | 0,000161 |
| TMEM131  | 1,131929 | 4,40E-05 |
| WDR60    | 1,130749 | 0,000812 |
| SOGA1    | 1,130435 | 0,000132 |
| MAZ      | 1,126788 | 1,63E-05 |
| PDAP1    | 1,126235 | 9,84E-06 |
| SERP1    | 1,120583 | 5,12E-06 |
| G6PC3    | 1,118029 | 0,000104 |
| UQCRB    | 1,116818 | 0,000114 |
| MIDN     | 1,114656 | 0,000241 |
| ZMYND11  | 1,11253  | 0,000169 |
| NDUFB2   | 1,111588 | 2,50E-05 |
| METTL9   | 1,110599 | 9,18E-06 |
| NSD1     | 1,110145 | 0,000189 |
| TCEB2    | 1,106284 | 0,000114 |
| TMED10   | 1,104108 | 2,90E-05 |
| EPB41L5  | 1,103659 | 7,67E-05 |
| RPS14    | 1,103346 | 6,41E-05 |
| KIF14    | 1,102437 | 0,000371 |
| RPS17    | 1,101195 | 0,000305 |
| PPP1R14B | 1,100621 | 4,13E-06 |
| EHMT2    | 1,099958 | 0,000885 |
| TRAF4    | 1,099753 | 9,59E-05 |
| EPN1     | 1,099571 | 0,000453 |
| RPL32    | 1,098999 | 0,000254 |
| BCL7C    | 1,097857 | 8,13E-05 |
| P2RX4    | 1,095654 | 0,000532 |
| ANKIB1   | 1,094538 | 0,000123 |
| SNRPC    | 1,094029 | 5,92E-05 |
| TPX2     | 1,093119 | 2,37E-05 |
| SUV420H1 | 1,089888 | 0,000221 |
| ZC3H3    | 1,083688 | 0,000381 |
| NDUFS8   | 1,082541 | 7,72E-05 |
| PLEKHF2  | 1,082523 | 0,000161 |
| CST3     | 1,081429 | 0,000439 |
| CDKN3    | 1,081273 | 0,000177 |
| IMPA2    | 1,081061 | 0,000272 |
| COX6B1   | 1,080597 | 8,83E-05 |
| TCF25    | 1,078536 | 1,34E-05 |
| CENPE    | 1,078197 | 0,000355 |
| UBQLN4   | 1,07586  | 4,38E-05 |
| PIGT     | 1,074556 | 0,000152 |
| PFDN5    | 1,072165 | 4,23E-05 |
| IMPDH1   | 1,071832 | 0,000928 |
| RNF13    | 1,071703 | 0,000406 |
| MPDU1    | 1,071301 | 0,00017  |
| RNF139   | 1,070091 | 7,37E-05 |
| CERS2    | 1,069505 | 1,89E-05 |
| RARA     | 1,069378 | 0,000857 |

|          |          |          |
|----------|----------|----------|
| ATRAID   | 1,067573 | 0,000454 |
| GPAA1    | 1,067319 | 0,00027  |
| STX6     | 1,0664   | 5,05E-05 |
| CDYL     | 1,065245 | 0,000141 |
| LLPH     | 1,0639   | 2,72E-05 |
| TMEM141  | 1,060288 | 0,000111 |
| MRPS12   | 1,058865 | 0,000149 |
| NDUFB4   | 1,057686 | 8,99E-05 |
| ALDH3A2  | 1,053649 | 2,02E-05 |
| LOC90784 | 1,05364  | 0,000672 |
| PHLPP1   | 1,053546 | 0,000147 |
| NUCB1    | 1,052177 | 0,000185 |
| LRRC45   | 1,043062 | 0,000309 |
| ATP5A1   | 1,041263 | 4,26E-05 |
| GCC1     | 1,041257 | 0,000249 |
| CUL9     | 1,040863 | 0,000781 |
| RAB3IP   | 1,039244 | 4,72E-05 |
| AP2S1    | 1,039215 | 0,000137 |
| FAM195A  | 1,03706  | 0,000262 |
| TOP1MT   | 1,036653 | 0,000728 |
| ECHS1    | 1,03432  | 6,51E-05 |
| IDH3G    | 1,033441 | 9,09E-05 |
| SYPL1    | 1,032682 | 0,000293 |
| GLTSCR2  | 1,028248 | 5,64E-05 |
| RFC2     | 1,027588 | 3,19E-05 |
| TDG      | 1,027117 | 0,000706 |
| PEX11B   | 1,026548 | 0,000923 |
| ZNRF3    | 1,024904 | 2,90E-05 |
| DNPH1    | 1,024556 | 7,45E-05 |
| VPS52    | 1,024554 | 0,000268 |
| ADNP     | 1,022612 | 0,000169 |
| CNOT2    | 1,021947 | 0,000142 |
| GON4L    | 1,021654 | 0,000177 |
| OSTC     | 1,020862 | 0,000677 |
| METTL2A  | 1,020858 | 0,00072  |
| ANAPC11  | 1,017775 | 0,001005 |
| TPGS2    | 1,017709 | 0,000306 |
| ZFP62    | 1,017476 | 0,000486 |
| ARNT     | 1,016907 | 0,00029  |
| C6orf47  | 1,016459 | 0,000741 |
| CYBA     | 1,012695 | 0,000393 |
| CENPN    | 1,010042 | 9,59E-05 |
| PAK2     | 1,006591 | 0,000125 |
| KRIT1    | 1,001478 | 0,000489 |
| MAPKAP1  | 0,996664 | 0,000702 |
| SLC25A39 | 0,996058 | 2,90E-05 |
| NCAPG2   | 0,995039 | 0,001007 |
| RPS15A   | 0,992017 | 0,000601 |
| TUBGCP2  | 0,991597 | 0,000174 |
| BCAP29   | 0,984462 | 0,00081  |



|           |          |          |
|-----------|----------|----------|
| CDK2AP2   | 0,984389 | 0,000416 |
| ZC3H18    | 0,980808 | 0,000242 |
| UBL7      | 0,978634 | 0,000988 |
| ATP5I     | 0,97659  | 8,26E-05 |
| LMNB1     | 0,975967 | 0,000546 |
| MRPL21    | 0,974143 | 0,000667 |
| CCZ1B     | 0,970773 | 0,000676 |
| PIGX      | 0,966721 | 0,000775 |
| NDUFB7    | 0,96622  | 0,000102 |
| PPP2R5E   | 0,965265 | 0,000203 |
| CHCHD3    | 0,964102 | 0,000137 |
| NSDHL     | 0,960821 | 0,000742 |
| PRR13     | 0,95815  | 0,00033  |
| YWHAZ     | 0,956842 | 0,000452 |
| SPATS2    | 0,95621  | 0,000495 |
| FBR5      | 0,955855 | 8,41E-05 |
| TRIM28    | 0,954391 | 5,64E-05 |
| GGCT      | 0,952785 | 0,000174 |
| EIF3E     | 0,952113 | 0,000667 |
| KRTCAP2   | 0,951387 | 0,00048  |
| RPL8      | 0,951011 | 0,000273 |
| PPP1CA    | 0,950711 | 6,44E-05 |
| HNRNPAB   | 0,94831  | 0,00017  |
| ARMT1     | 0,947934 | 0,000976 |
| EIF3H     | 0,938998 | 0,000115 |
| PI4KB     | 0,937409 | 0,00055  |
| HMBS      | 0,933403 | 0,000639 |
| ILVBL     | 0,932742 | 0,000216 |
| KIAA1429  | 0,932644 | 0,00077  |
| NBN       | 0,93235  | 0,000144 |
| SGPL1     | 0,926557 | 0,000485 |
| CPNE3     | 0,926097 | 0,000495 |
| DYM       | 0,920241 | 0,000462 |
| MAP4K4    | 0,915212 | 0,000845 |
| IMP4      | 0,91127  | 0,000896 |
| RAB5A     | 0,910386 | 0,000596 |
| GPX4      | 0,908832 | 0,000242 |
| ATP5C1    | 0,906909 | 0,000768 |
| MRPS34    | 0,906637 | 0,00052  |
| MAPKAPK2  | 0,894728 | 0,000495 |
| ACAA2     | 0,894079 | 0,000566 |
| RALY      | 0,890634 | 0,000742 |
| PABPC1    | 0,883962 | 0,000106 |
| BPTF      | 0,876065 | 0,000534 |
| TOP1      | 0,872743 | 0,00031  |
| GNB2L1    | 0,866841 | 0,00031  |
| C14orf166 | 0,861927 | 0,000749 |
| UQCRCQ    | 0,859634 | 0,000676 |
| PSMC1     | 0,854815 | 0,000484 |
| ITPK1     | 0,842833 | 0,000645 |

|          |          |          |
|----------|----------|----------|
| KIAA1191 | 0,841258 | 0,000929 |
| CHMP4B   | 0,816357 | 0,000935 |
| CSNK2A1  | -0,83341 | 0,00078  |
| SLC20A1  | -0,85711 | 0,001001 |
| DNTTIP2  | -0,86263 | 0,000908 |
| UBR4     | -0,86574 | 0,000767 |
| THOP1    | -0,86635 | 0,000599 |
| TIMM13   | -0,87576 | 0,000871 |
| PBRM1    | -0,87803 | 0,000468 |
| NAP1L4   | -0,87975 | 0,000369 |
| MFN2     | -0,88066 | 0,000355 |
| ITCH     | -0,88232 | 0,000882 |
| CLIP1    | -0,88714 | 0,000571 |
| EML4     | -0,89213 | 0,000717 |
| ODC1     | -0,90438 | 0,000263 |
| MAPK1    | -0,91361 | 0,000604 |
| MAP4     | -0,923   | 0,000167 |
| STK25    | -0,92328 | 0,000412 |
| RNF220   | -0,93016 | 0,000438 |
| ZNF106   | -0,93039 | 0,000376 |
| ATP6V1B2 | -0,93504 | 0,000564 |
| GIGYF2   | -0,9373  | 0,000218 |
| PHIP     | -0,94081 | 0,000449 |
| AK2      | -0,94168 | 0,000252 |
| KAT6A    | -0,94466 | 0,000754 |
| CLSTN1   | -0,94482 | 0,000494 |
| PUM1     | -0,94566 | 0,00035  |
| SUN1     | -0,9501  | 0,000511 |
| POLRMT   | -0,95017 | 0,000954 |
| SETX     | -0,95276 | 0,00057  |
| SBDS     | -0,95284 | 0,000445 |
| QSOX1    | -0,95314 | 0,000407 |
| NISCH    | -0,95431 | 0,000625 |
| CCT8     | -0,95698 | 0,000236 |
| ARHGEF12 | -0,95791 | 0,000494 |
| RBM6     | -0,95838 | 0,000619 |
| PITPNB   | -0,95869 | 0,000339 |
| SENPA6   | -0,96176 | 0,000972 |
| APPL1    | -0,966   | 0,000639 |
| OGFR     | -0,96666 | 0,00091  |
| ERLIN2   | -0,96682 | 0,000432 |
| CYFIP1   | -0,96805 | 0,000905 |
| VPS37B   | -0,9684  | 0,000746 |
| TXNDC12  | -0,97032 | 0,000627 |
| CNOT1    | -0,97038 | 3,78E-05 |
| THRAP3   | -0,97142 | 0,000171 |
| PRKDC    | -0,97204 | 0,000444 |
| FAM3C    | -0,97368 | 0,000418 |
| CEP104   | -0,97675 | 0,000777 |
| SEPN1    | -0,97707 | 0,0007   |

|         |          |          |
|---------|----------|----------|
| ZYX     | -0,97726 | 0,000711 |
| NCL     | -0,97928 | 3,04E-05 |
| WDFY1   | -0,98486 | 0,000543 |
| PCNA    | -0,98715 | 0,000262 |
| TRABD   | -0,99053 | 0,000431 |
| ABLIM1  | -0,99112 | 0,000237 |
| RLIM    | -0,99294 | 0,00032  |
| ALS2    | -0,99403 | 0,000581 |
| MARCKS  | -1,00485 | 0,000694 |
| GIN54   | -1,00522 | 0,000706 |
| URB1    | -1,00528 | 0,000588 |
| MTHFD1L | -1,00661 | 0,000819 |
| EXOSC10 | -1,00674 | 0,000747 |
| PRKD3   | -1,00915 | 0,000409 |
| TOMM34  | -1,01015 | 0,000293 |
| ACBD3   | -1,01059 | 0,000203 |
| TTLL12  | -1,01245 | 0,000438 |
| TMEM2   | -1,01299 | 0,000695 |
| ETNK1   | -1,01569 | 0,000563 |
| TPCN1   | -1,01679 | 0,001007 |
| NOLC1   | -1,02    | 0,000235 |
| OGFOD1  | -1,02132 | 9,49E-05 |
| WASF2   | -1,02351 | 0,000115 |
| USP48   | -1,0245  | 0,000988 |
| TMED5   | -1,02452 | 0,0009   |
| TMEM259 | -1,02469 | 7,51E-05 |
| CTDSPL  | -1,02526 | 0,000231 |
| NDUFA10 | -1,02644 | 0,000108 |
| CUL5    | -1,02828 | 0,000543 |
| NUDT21  | -1,03083 | 9,40E-05 |
| GCH1    | -1,03305 | 0,000696 |
| GMDS    | -1,03384 | 0,000714 |
| AGPAT5  | -1,03469 | 0,0006   |
| P4HA1   | -1,03604 | 0,000236 |
| GOSR1   | -1,03779 | 0,000625 |
| LRRC41  | -1,04221 | 5,97E-05 |
| IBTK    | -1,04457 | 0,000218 |
| COPS2   | -1,04552 | 0,000149 |
| CDK12   | -1,04683 | 0,000742 |
| NHLRC2  | -1,048   | 0,001003 |
| LMAN1   | -1,04998 | 0,000258 |
| UBE3A   | -1,05133 | 2,16E-05 |
| BLMH    | -1,05191 | 0,000954 |
| NDC1    | -1,05418 | 0,000724 |
| TEAD1   | -1,05479 | 8,97E-05 |
| RFC1    | -1,05646 | 4,50E-05 |
| SLC25A6 | -1,05919 | 0,0001   |
| ZFAND5  | -1,05982 | 7,54E-05 |
| DHX30   | -1,06169 | 0,000112 |
| SLC46A1 | -1,06448 | 0,00084  |

|          |          |          |
|----------|----------|----------|
| GPX8     | -1,065   | 0,00096  |
| AGAP1    | -1,06623 | 0,000741 |
| SHROOM3  | -1,06967 | 8,86E-05 |
| TUBGCP3  | -1,0718  | 0,000425 |
| TMC6     | -1,07323 | 0,000603 |
| SRSF11   | -1,07492 | 9,04E-05 |
| FNIP1    | -1,07559 | 0,000204 |
| APBB2    | -1,08022 | 0,000461 |
| CC2D1B   | -1,08036 | 0,000206 |
| NECAP1   | -1,08493 | 0,000182 |
| TCF20    | -1,08631 | 2,24E-05 |
| GTF2H1   | -1,08653 | 4,92E-05 |
| ZNF335   | -1,08748 | 0,000488 |
| YRDC     | -1,08806 | 0,000866 |
| PLEKHA5  | -1,08983 | 0,000871 |
| KHNYN    | -1,09002 | 0,000764 |
| PHF3     | -1,09155 | 0,000135 |
| SIK3     | -1,09249 | 9,89E-05 |
| LRPPRC   | -1,09332 | 3,25E-06 |
| PLP2     | -1,09425 | 4,38E-05 |
| MTF1     | -1,09532 | 0,000172 |
| SHMT1    | -1,0968  | 0,000387 |
| CLEC16A  | -1,097   | 0,000131 |
| ATM      | -1,09834 | 0,000648 |
| RIF1     | -1,10291 | 0,000296 |
| SBNO2    | -1,10345 | 0,000138 |
| GTF2H3   | -1,10604 | 0,000609 |
| TICAM1   | -1,10671 | 0,000745 |
| AP2B1    | -1,11322 | 6,32E-06 |
| EIF3J    | -1,11342 | 2,71E-05 |
| ARHGAP27 | -1,11408 | 0,00044  |
| TRAPPC11 | -1,11627 | 0,000112 |
| VPRBP    | -1,11768 | 3,52E-05 |
| GNA11    | -1,11789 | 1,66E-05 |
| MAST3    | -1,11923 | 0,000546 |
| ZYG11B   | -1,12217 | 0,0005   |
| EBLN3    | -1,12354 | 7,79E-05 |
| RNF138   | -1,12528 | 0,000121 |
| ARFGEF1  | -1,12574 | 8,75E-05 |
| NUP133   | -1,12623 | 0,00046  |
| CKAP4    | -1,12653 | 4,54E-06 |
| PHF13    | -1,12705 | 0,000216 |
| CWC25    | -1,12807 | 0,000533 |
| CELSR1   | -1,13278 | 0,000226 |
| PRPS1    | -1,13306 | 0,000343 |
| EYA3     | -1,13363 | 0,000495 |
| USP9X    | -1,13393 | 0,000479 |
| MARVELD1 | -1,13508 | 0,00041  |
| SERTAD2  | -1,1373  | 0,00021  |
| ORC1     | -1,13757 | 0,000383 |

|          |          |          |
|----------|----------|----------|
| ARHGEF18 | -1,13812 | 4,62E-05 |
| ELK1     | -1,1384  | 0,000132 |
| USP1     | -1,1393  | 0,000603 |
| ENTPD4   | -1,14001 | 0,000735 |
| USP25    | -1,14291 | 0,000368 |
| MTERF4   | -1,14421 | 0,000511 |
| TMEM123  | -1,14531 | 5,16E-06 |
| TBC1D20  | -1,14585 | 0,000182 |
| LDHA     | -1,14682 | 0,000591 |
| LPGAT1   | -1,14967 | 9,74E-05 |
| UBR3     | -1,15015 | 0,000263 |
| C17orf96 | -1,15186 | 7,88E-05 |
| BAP1     | -1,15465 | 1,87E-05 |
| ESCO2    | -1,15587 | 0,000255 |
| EIF3M    | -1,15672 | 1,70E-06 |
| MFAP1    | -1,15688 | 0,000239 |
| SMC1A    | -1,15763 | 1,79E-05 |
| HIGD1A   | -1,1599  | 0,000103 |
| HBS1L    | -1,16111 | 0,000581 |
| PTAR1    | -1,16158 | 0,000787 |
| NF1      | -1,16298 | 0,000327 |
| DOCK9    | -1,1644  | 0,000796 |
| RHPN2    | -1,16519 | 0,00092  |
| BAG4     | -1,16607 | 7,26E-05 |
| MANEAL   | -1,16614 | 1,53E-05 |
| NVL      | -1,16692 | 0,000119 |
| FOXK1    | -1,16705 | 0,000181 |
| KIAA1468 | -1,16818 | 0,000328 |
| INTS10   | -1,16914 | 0,00019  |
| BBS7     | -1,16986 | 0,000428 |
| UFL1     | -1,17144 | 0,000375 |
| RCC1     | -1,17325 | 9,65E-06 |
| BTAF1    | -1,17471 | 0,000101 |
| TRIOBP   | -1,17522 | 0,000445 |
| CAB39    | -1,17526 | 7,50E-06 |
| TFDP1    | -1,17697 | 1,27E-06 |
| CHAF1A   | -1,17829 | 0,000482 |
| PPP1R26  | -1,18049 | 0,0002   |
| QRSL1    | -1,18076 | 6,32E-05 |
| MPP6     | -1,18141 | 0,000578 |
| LYRM7    | -1,18144 | 0,000136 |
| CBL      | -1,18292 | 3,94E-05 |
| LSR      | -1,1836  | 0,00071  |
| ASXL2    | -1,18374 | 0,00011  |
| CORO1C   | -1,18402 | 4,35E-05 |
| BOK      | -1,18597 | 0,000271 |
| COLGALT1 | -1,18616 | 9,02E-05 |
| FUCA2    | -1,18728 | 0,000292 |
| FAM83G   | -1,18939 | 2,43E-05 |
| U2SURP   | -1,19012 | 3,06E-06 |

|          |          |          |
|----------|----------|----------|
| RBFOX2   | -1,19052 | 7,76E-06 |
| C6orf132 | -1,19261 | 1,86E-05 |
| COPRS    | -1,19326 | 0,000236 |
| ROCK2    | -1,19332 | 2,00E-06 |
| FLNB     | -1,19398 | 6,84E-05 |
| C1orf198 | -1,19436 | 0,000525 |
| CD99     | -1,19484 | 7,50E-06 |
| ACSL1    | -1,19611 | 0,000123 |
| CYTH3    | -1,19707 | 0,000262 |
| CD164    | -1,19958 | 1,16E-05 |
| LRRC42   | -1,19978 | 1,48E-05 |
| AIDA     | -1,20067 | 0,000283 |
| TTL      | -1,20221 | 9,24E-05 |
| CEP97    | -1,2032  | 0,000573 |
| HACD2    | -1,20517 | 0,000883 |
| PIDD1    | -1,20582 | 0,000346 |
| EPRS     | -1,20626 | 1,40E-07 |
| SCARA3   | -1,20688 | 0,000825 |
| TCEB3    | -1,20775 | 7,69E-05 |
| SEPT2    | -1,20941 | 1,19E-06 |
| WDR36    | -1,20996 | 0,000118 |
| LRRC40   | -1,21165 | 0,000494 |
| TRMU     | -1,21294 | 0,00028  |
| CSNK2A2  | -1,21354 | 5,16E-06 |
| TRMT6    | -1,21537 | 4,72E-05 |
| STIM1    | -1,21605 | 3,19E-05 |
| DDX52    | -1,21667 | 5,42E-05 |
| USP40    | -1,21742 | 0,000116 |
| RER1     | -1,21988 | 1,86E-06 |
| CDC6     | -1,22287 | 0,000131 |
| EIF4G3   | -1,22509 | 3,77E-07 |
| CCDC186  | -1,22656 | 0,000537 |
| SH3D19   | -1,22658 | 2,38E-05 |
| DCAKD    | -1,22859 | 1,63E-05 |
| CBWD1    | -1,22912 | 0,000629 |
| BAZ2A    | -1,23089 | 3,48E-05 |
| TAF1     | -1,23099 | 0,000229 |
| HIATL1   | -1,23351 | 9,01E-06 |
| AKR1A1   | -1,23369 | 2,67E-06 |
| XPNPEP1  | -1,23512 | 0,000102 |
| ARMC9    | -1,23528 | 0,000209 |
| QSER1    | -1,23606 | 6,40E-07 |
| KCTD9    | -1,23629 | 2,14E-05 |
| UPF3A    | -1,23743 | 5,67E-05 |
| NIPA1    | -1,24377 | 5,64E-05 |
| FRG1     | -1,2452  | 0,000555 |
| CCDC93   | -1,24598 | 8,17E-05 |
| SYMPK    | -1,24691 | 1,75E-07 |
| KLF16    | -1,24695 | 0,00056  |
| EMC3-AS1 | -1,24897 | 0,000174 |

|           |          |          |
|-----------|----------|----------|
| AMD1      | -1,24941 | 0,000175 |
| GALNT7    | -1,24989 | 0,00099  |
| FBXO30    | -1,25307 | 0,000453 |
| KDELC2    | -1,25367 | 0,000256 |
| DSCR3     | -1,25462 | 4,86E-05 |
| SRSF4     | -1,25503 | 9,02E-06 |
| PKN2      | -1,25541 | 7,41E-05 |
| RHOBTB3   | -1,25602 | 4,24E-05 |
| DOCK7     | -1,25744 | 1,86E-05 |
| CASK      | -1,25796 | 5,70E-05 |
| EPB41     | -1,26195 | 6,20E-05 |
| WRN       | -1,26267 | 0,00074  |
| KPNA6     | -1,26274 | 0,00014  |
| SPTBN1    | -1,26419 | 3,78E-08 |
| USP28     | -1,26547 | 0,000116 |
| TNFAIP8L1 | -1,266   | 0,000378 |
| DIS3      | -1,26653 | 1,60E-05 |
| NOL6      | -1,26665 | 0,000651 |
| NUP50     | -1,26881 | 7,46E-05 |
| AHNAK     | -1,26908 | 7,88E-05 |
| C9orf40   | -1,26969 | 0,000256 |
| SLC6A6    | -1,26984 | 0,001003 |
| SLC35F2   | -1,27013 | 0,000282 |
| ago-03    | -1,27072 | 0,000858 |
| TNKS      | -1,27239 | 0,000785 |
| APP       | -1,27266 | 6,30E-08 |
| PRMT3     | -1,27449 | 0,000115 |
| ADAM10    | -1,27493 | 1,12E-05 |
| HIP1      | -1,27547 | 5,59E-07 |
| IPO7      | -1,27872 | 6,86E-08 |
| EPS15     | -1,27875 | 8,84E-06 |
| HAUS6     | -1,27935 | 1,79E-05 |
| MAPKAPK3  | -1,27995 | 0,000106 |
| PISD      | -1,28001 | 9,29E-06 |
| LARS2     | -1,28019 | 6,16E-05 |
| MIEF1     | -1,28027 | 8,14E-07 |
| SOAT1     | -1,28034 | 0,000426 |
| PPTC7     | -1,2829  | 1,60E-05 |
| CASP8     | -1,28628 | 2,31E-05 |
| MTR       | -1,28703 | 0,000438 |
| ACADM     | -1,28784 | 1,15E-05 |
| PTPN3     | -1,28819 | 0,000175 |
| DFFA      | -1,29026 | 2,84E-05 |
| RMDN3     | -1,29082 | 0,000899 |
| ITGAV     | -1,29202 | 1,76E-05 |
| C12orf4   | -1,29237 | 0,000489 |
| PYCR2     | -1,29405 | 0,000809 |
| MT01      | -1,29431 | 2,03E-05 |
| DDX10     | -1,29484 | 5,24E-06 |
| ERI1      | -1,29595 | 1,55E-05 |

|          |          |          |
|----------|----------|----------|
| CDC42EP2 | -1,29992 | 0,000733 |
| LONP2    | -1,3002  | 3,10E-07 |
| HIAT1    | -1,30071 | 6,49E-05 |
| PROSC    | -1,30234 | 3,76E-06 |
| MROH6    | -1,30476 | 0,000806 |
| CNOT6L   | -1,3059  | 3,12E-05 |
| CCDC109B | -1,30602 | 0,000996 |
| DVL1     | -1,30634 | 9,55E-06 |
| SH3PXD2B | -1,30716 | 0,000351 |
| INPP5F   | -1,30831 | 0,000201 |
| LZTR1    | -1,30876 | 2,98E-05 |
| KIAA0040 | -1,30972 | 5,65E-05 |
| PDIA3    | -1,31122 | 1,32E-07 |
| OSGEP    | -1,31152 | 0,000162 |
| TPP1     | -1,31358 | 2,69E-05 |
| SPAG9    | -1,31358 | 0,000102 |
| TRAF3    | -1,31417 | 2,03E-06 |
| STK4     | -1,31469 | 7,96E-07 |
| FAM111A  | -1,32034 | 0,00073  |
| MAK16    | -1,32245 | 0,000211 |
| PAPD5    | -1,32422 | 1,05E-05 |
| MLLT6    | -1,32435 | 1,91E-08 |
| ARFGAP3  | -1,32465 | 0,000265 |
| NOCT     | -1,32481 | 6,17E-05 |
| ZNF770   | -1,32518 | 0,000482 |
| SGK223   | -1,32556 | 0,00051  |
| NDFIP2   | -1,32939 | 8,92E-06 |
| PLS1     | -1,33135 | 0,000118 |
| SLC35D1  | -1,33487 | 0,000219 |
| CHAF1B   | -1,33678 | 2,62E-05 |
| REXO2    | -1,33698 | 0,00089  |
| FDFT1    | -1,33892 | 4,38E-05 |
| JOSD1    | -1,3394  | 2,17E-07 |
| RBM26    | -1,33951 | 1,24E-05 |
| RPUSD4   | -1,34124 | 1,62E-05 |
| MFHAS1   | -1,34204 | 9,45E-08 |
| LAMA3    | -1,34219 | 0,000592 |
| ATP11B   | -1,34365 | 4,57E-07 |
| TRAK1    | -1,34452 | 2,30E-06 |
| CEP57    | -1,34461 | 0,00035  |
| ZNF37A   | -1,34509 | 1,38E-05 |
| ALAS1    | -1,34596 | 3,33E-05 |
| SEPT11   | -1,34703 | 1,58E-08 |
| BAG2     | -1,34785 | 2,91E-05 |
| MCM8     | -1,34851 | 8,35E-05 |
| TOLLIP   | -1,34923 | 0,000708 |
| PTPRU    | -1,3494  | 1,39E-05 |
| SRRM1    | -1,3498  | 2,22E-06 |
| NOC3L    | -1,35069 | 0,000292 |
| TWISTNB  | -1,35219 | 3,12E-06 |



|         |          |          |
|---------|----------|----------|
| DESI2   | -1,35323 | 1,51E-06 |
| BIRC2   | -1,35569 | 0,000264 |
| DCAF12  | -1,35657 | 9,18E-08 |
| VAMP2   | -1,36111 | 1,55E-05 |
| KLHL5   | -1,36134 | 3,19E-05 |
| PIM3    | -1,36311 | 6,31E-05 |
| CLN8    | -1,36422 | 9,29E-06 |
| PIIP5K1 | -1,36493 | 2,19E-06 |
| GSR     | -1,36529 | 7,99E-06 |
| UBA5    | -1,36544 | 4,31E-05 |
| FOXO3   | -1,36623 | 0,000651 |
| RPS6KA1 | -1,36665 | 0,000291 |
| EDEM1   | -1,36713 | 8,55E-06 |
| ANKZF1  | -1,36846 | 0,000375 |
| MGAT5   | -1,36869 | 6,16E-06 |
| ATXN2   | -1,36873 | 1,01E-06 |
| SPOP    | -1,36908 | 5,37E-06 |
| P4HA2   | -1,3695  | 0,000174 |
| PGM2    | -1,37267 | 0,000249 |
| KLHL18  | -1,37486 | 0,000706 |
| BROX    | -1,37549 | 2,95E-07 |
| ERO1A   | -1,37974 | 0,000257 |
| ZMYM6   | -1,37981 | 0,000177 |
| PKD2    | -1,37992 | 6,76E-05 |
| POLM    | -1,38174 | 0,00016  |
| MCFD2   | -1,38191 | 3,65E-07 |
| EHD2    | -1,38517 | 0,000146 |
| CCSAP   | -1,38626 | 0,000188 |
| YIPF6   | -1,3864  | 2,97E-07 |
| SLC35A3 | -1,38908 | 8,39E-06 |
| SSH2    | -1,39063 | 5,73E-05 |
| SACM1L  | -1,39187 | 1,58E-06 |
| ZC3H7B  | -1,3939  | 3,98E-08 |
| DR1     | -1,394   | 1,09E-07 |
| NSRP1   | -1,39488 | 1,59E-05 |
| RANGRF  | -1,39563 | 0,000135 |
| UTP14C  | -1,39701 | 7,85E-05 |
| STX3    | -1,39831 | 4,01E-05 |
| DSG2    | -1,39855 | 1,08E-08 |
| NEMP1   | -1,40028 | 5,23E-06 |
| PBK     | -1,40311 | 8,40E-05 |
| MIA3    | -1,40318 | 9,98E-08 |
| NMNAT1  | -1,40763 | 0,000693 |
| ILKAP   | -1,40867 | 8,97E-05 |
| COASY   | -1,40869 | 3,63E-08 |
| RAB29   | -1,41345 | 8,79E-05 |
| NXN     | -1,41493 | 2,48E-06 |
| KIF1B   | -1,41593 | 4,64E-05 |
| HERC2   | -1,41886 | 5,09E-07 |
| TNPO1   | -1,4212  | 3,03E-09 |

|           |          |          |
|-----------|----------|----------|
| SLBP      | -1,42286 | 2,01E-06 |
| KREMEN1   | -1,42363 | 2,18E-07 |
| GALNT2    | -1,42698 | 1,18E-05 |
| AGFG2     | -1,42866 | 0,000453 |
| H6PD      | -1,42968 | 8,44E-05 |
| AGTPBP1   | -1,42995 | 3,91E-06 |
| MSI2      | -1,43011 | 3,85E-06 |
| REL       | -1,43304 | 2,23E-06 |
| TBX3      | -1,43409 | 2,36E-07 |
| PNP       | -1,43675 | 4,16E-06 |
| DTX3L     | -1,44032 | 0,000318 |
| CMTM4     | -1,4414  | 3,59E-09 |
| NFIA      | -1,44178 | 3,88E-06 |
| ACBD5     | -1,44398 | 8,38E-06 |
| TMEM181   | -1,44651 | 1,02E-06 |
| DPYSL2    | -1,44682 | 0,000775 |
| BBX       | -1,44831 | 1,60E-06 |
| MKNK2     | -1,44862 | 1,03E-06 |
| MORC3     | -1,44997 | 4,54E-05 |
| SCRN1     | -1,45249 | 2,06E-08 |
| HMGA1     | -1,45325 | 1,14E-06 |
| STK39     | -1,454   | 0,000656 |
| RAD54L2   | -1,45414 | 5,86E-05 |
| TARBP1    | -1,4545  | 0,000407 |
| SZT2      | -1,45456 | 0,000355 |
| TACC1     | -1,45653 | 1,18E-07 |
| CYB5RL    | -1,45666 | 0,000423 |
| SORBS3    | -1,45684 | 1,47E-06 |
| PACSIN2   | -1,4574  | 5,01E-07 |
| PRICKLE3  | -1,46473 | 2,28E-05 |
| ABCD3     | -1,46655 | 3,56E-07 |
| MED8      | -1,46946 | 0,000118 |
| COTL1     | -1,46968 | 1,53E-07 |
| METTLL17  | -1,47    | 0,000376 |
| CHD9      | -1,4716  | 1,88E-05 |
| API5      | -1,47192 | 1,33E-07 |
| OTUD3     | -1,47252 | 3,03E-05 |
| WDR81     | -1,47327 | 2,96E-05 |
| B3GALNT2  | -1,47486 | 2,87E-07 |
| RAB3GAP2  | -1,47514 | 3,80E-08 |
| QSOX2     | -1,4766  | 3,64E-05 |
| PQLC1     | -1,47747 | 3,21E-06 |
| SYNJ2     | -1,48132 | 1,47E-05 |
| PGM3      | -1,48214 | 2,12E-05 |
| DNAJC24   | -1,4822  | 0,000833 |
| DOPEY1    | -1,48222 | 0,000338 |
| DDX21     | -1,48226 | 2,59E-07 |
| LOC100506 | -1,48471 | 0,000204 |
| LMF2      | -1,48656 | 2,97E-06 |
| RTCA      | -1,4881  | 2,95E-07 |

|         |          |          |
|---------|----------|----------|
| SH3RF1  | -1,48818 | 0,000877 |
| BMP2K   | -1,4891  | 3,10E-05 |
| SFMBT1  | -1,49115 | 9,36E-05 |
| FOXN2   | -1,49216 | 3,83E-05 |
| USP16   | -1,49262 | 1,19E-08 |
| RRAS2   | -1,49307 | 9,48E-06 |
| P3H1    | -1,49411 | 1,20E-05 |
| TFB1M   | -1,49464 | 0,000652 |
| PDE12   | -1,49468 | 2,00E-08 |
| TYMS    | -1,49672 | 1,50E-09 |
| CCBL2   | -1,50003 | 2,80E-07 |
| YARS    | -1,50083 | 5,64E-06 |
| TTC17   | -1,50374 | 5,21E-09 |
| WDR13   | -1,50837 | 0,000135 |
| CDC14B  | -1,50923 | 0,000119 |
| STX2    | -1,50966 | 0,000246 |
| CTNNAL1 | -1,51114 | 0,000208 |
| POLQ    | -1,51266 | 0,000456 |
| PDZD8   | -1,51276 | 4,37E-10 |
| MORN1   | -1,51344 | 9,94E-05 |
| ENO2    | -1,5141  | 0,00026  |
| HMHA1   | -1,51852 | 3,06E-06 |
| RHOBTB2 | -1,51907 | 6,66E-05 |
| PHF8    | -1,51907 | 4,54E-06 |
| MELK    | -1,52082 | 2,05E-09 |
| IPO5    | -1,52148 | 1,71E-08 |
| CDC25A  | -1,52399 | 1,58E-05 |
| DNAJC16 | -1,52407 | 2,03E-06 |
| PIBF1   | -1,52407 | 0,000954 |
| PRKAR2A | -1,52449 | 3,91E-05 |
| RDX     | -1,52652 | 1,40E-07 |
| NT5DC3  | -1,52829 | 3,12E-05 |
| NPAT    | -1,52927 | 2,60E-06 |
| MYO1B   | -1,52968 | 5,46E-06 |
| ACD     | -1,52981 | 1,89E-07 |
| GPC4    | -1,53098 | 2,96E-05 |
| MCOLN1  | -1,53506 | 2,08E-05 |
| DGKQ    | -1,53839 | 7,22E-05 |
| HLCS    | -1,53841 | 0,000646 |
| S100A6  | -1,53848 | 0,000626 |
| AHCTF1  | -1,53966 | 2,33E-06 |
| OSBP    | -1,54299 | 1,13E-09 |
| GTPBP1  | -1,54314 | 2,04E-07 |
| GART    | -1,54367 | 1,48E-08 |
| ZNF37BP | -1,54547 | 5,81E-05 |
| CRLF3   | -1,54561 | 0,000531 |
| SARM1   | -1,54849 | 0,000223 |
| GLIS2   | -1,54984 | 6,80E-05 |
| TOE1    | -1,5506  | 8,64E-05 |
| ACACA   | -1,55111 | 1,24E-09 |

|          |          |          |
|----------|----------|----------|
| DESI1    | -1,55685 | 4,52E-10 |
| PKP2     | -1,55801 | 8,82E-05 |
| OTUD4    | -1,55845 | 2,56E-07 |
| MYCBP2   | -1,56031 | 5,02E-07 |
| KANK1    | -1,56103 | 1,54E-06 |
| POMZP3   | -1,56775 | 1,81E-05 |
| NKTR     | -1,56787 | 1,39E-07 |
| TGFB1    | -1,56821 | 2,35E-08 |
| TGFBR2   | -1,56853 | 5,59E-05 |
| MGAT4A   | -1,57053 | 0,000101 |
| WRAP73   | -1,57288 | 0,000239 |
| MAP3K10  | -1,57354 | 3,26E-06 |
| RPAP2    | -1,57553 | 5,93E-07 |
| LRP6     | -1,57754 | 1,28E-07 |
| SLC4A3   | -1,57875 | 0,0006   |
| PCNXL2   | -1,57994 | 1,68E-06 |
| TMEM201  | -1,5801  | 5,00E-08 |
| LCOR     | -1,58294 | 6,34E-08 |
| C1orf216 | -1,58303 | 4,86E-07 |
| NUP43    | -1,58312 | 1,75E-06 |
| COBL     | -1,58319 | 4,28E-06 |
| TCF12    | -1,5836  | 1,10E-05 |
| MYSM1    | -1,58435 | 7,25E-05 |
| HDAC6    | -1,58454 | 6,31E-07 |
| RRM2     | -1,58497 | 9,92E-08 |
| CARS2    | -1,58632 | 2,00E-05 |
| GAL      | -1,58838 | 1,21E-07 |
| CBFB     | -1,58868 | 7,98E-09 |
| SSX2IP   | -1,58955 | 2,81E-08 |
| ARIH2    | -1,59134 | 3,98E-09 |
| TIFA     | -1,59154 | 0,000621 |
| TJP1     | -1,59173 | 9,03E-07 |
| ZNF324   | -1,59369 | 2,57E-05 |
| ATF4     | -1,59569 | 1,32E-05 |
| LENG8    | -1,59976 | 2,96E-05 |
| ASRGL1   | -1,60255 | 0,0001   |
| ANKH     | -1,60303 | 6,22E-07 |
| PDP1     | -1,60309 | 8,80E-06 |
| CFAP97   | -1,60311 | 2,29E-06 |
| DONSON   | -1,60474 | 1,07E-05 |
| PIK3C3   | -1,60492 | 7,77E-07 |
| DHRS11   | -1,60533 | 9,47E-05 |
| PARVA    | -1,6054  | 2,45E-06 |
| ACAT1    | -1,6062  | 4,93E-05 |
| FYCO1    | -1,61121 | 9,36E-06 |
| BEND7    | -1,61204 | 0,000906 |
| SYNJ1    | -1,61237 | 0,000232 |
| CLDND1   | -1,61275 | 7,34E-05 |
| STAT3    | -1,61909 | 1,97E-05 |
| PVR      | -1,62101 | 0,000229 |

|           |          |          |
|-----------|----------|----------|
| FAM213B   | -1,62399 | 5,94E-08 |
| JAK1      | -1,62435 | 6,10E-09 |
| KATNB1    | -1,62822 | 7,78E-09 |
| LRRFIP1   | -1,62866 | 8,77E-12 |
| PAQR3     | -1,62926 | 0,000109 |
| MALT1     | -1,63131 | 1,14E-07 |
| LRRC14    | -1,6314  | 2,62E-08 |
| ADCY3     | -1,63469 | 8,07E-09 |
| TMEM51    | -1,6353  | 1,04E-07 |
| SPRED2    | -1,63745 | 1,66E-10 |
| PITPNM2   | -1,64008 | 0,000155 |
| SWAP70    | -1,64072 | 5,23E-07 |
| C16orf70  | -1,64128 | 2,88E-06 |
| CAPRIN2   | -1,6442  | 0,000416 |
| AKAP17A   | -1,64539 | 5,64E-06 |
| HSPA13    | -1,64559 | 0,000327 |
| SKI       | -1,64811 | 2,52E-10 |
| NFKBIE    | -1,64905 | 4,88E-07 |
| CRELD1    | -1,6496  | 0,000314 |
| LGALS1    | -1,65117 | 7,89E-07 |
| PINK1-AS  | -1,65232 | 0,000134 |
| B4GALT6   | -1,65243 | 0,000452 |
| RELT      | -1,65442 | 1,62E-05 |
| ZSCAN12P1 | -1,65604 | 1,54E-05 |
| ETHE1     | -1,65872 | 8,79E-05 |
| TLN2      | -1,65892 | 7,12E-05 |
| PHF19     | -1,66372 | 2,62E-10 |
| SLC9A7    | -1,66648 | 0,0003   |
| EPHA10    | -1,6665  | 0,000906 |
| MT2A      | -1,66714 | 6,26E-09 |
| DFFB      | -1,66894 | 0,000809 |
| SUZ12     | -1,67063 | 1,93E-12 |
| CSPP1     | -1,6707  | 2,31E-06 |
| TMCO3     | -1,67087 | 1,80E-05 |
| JAG2      | -1,67118 | 5,93E-07 |
| PNKD      | -1,67125 | 4,55E-08 |
| PNPLA6    | -1,67435 | 0,000171 |
| MTMR10    | -1,67464 | 7,21E-06 |
| RUSC2     | -1,67474 | 0,000819 |
| TYW3      | -1,67588 | 5,00E-08 |
| MIER1     | -1,68038 | 6,12E-10 |
| PARP10    | -1,68134 | 0,000549 |
| LPIN1     | -1,6827  | 0,000332 |
| BICD1     | -1,68859 | 2,39E-05 |
| FAR1      | -1,68911 | 5,37E-11 |
| EHD4      | -1,68912 | 6,66E-08 |
| CD46      | -1,68925 | 7,51E-09 |
| MYO10     | -1,68949 | 2,05E-09 |
| WDR76     | -1,68988 | 9,73E-07 |
| MAN1A1    | -1,69125 | 6,16E-08 |

|           |          |          |
|-----------|----------|----------|
| OGT       | -1,6922  | 1,15E-05 |
| GNL3      | -1,69465 | 2,82E-07 |
| INF2      | -1,69789 | 8,65E-10 |
| ABCB7     | -1,70262 | 1,11E-06 |
| IGFBP4    | -1,70808 | 3,42E-05 |
| ARHGAP29  | -1,71072 | 4,01E-05 |
| CD59      | -1,71208 | 1,27E-05 |
| HEATR1    | -1,7178  | 9,64E-10 |
| MARC2     | -1,71969 | 0,000155 |
| AMIGO3    | -1,72227 | 0,000254 |
| TMEM63A   | -1,72787 | 3,29E-07 |
| SLC16A1   | -1,72846 | 4,01E-11 |
| CALCOCO2  | -1,73219 | 0,000894 |
| OSBPL5    | -1,73238 | 1,58E-06 |
| CROCCP2   | -1,73267 | 0,000564 |
| NMI       | -1,73368 | 0,000427 |
| ING5      | -1,73396 | 4,31E-05 |
| TAP2      | -1,73418 | 3,08E-07 |
| DENND5A   | -1,7352  | 1,28E-06 |
| SAMD8     | -1,73674 | 2,08E-08 |
| CAMK1D    | -1,73697 | 1,08E-05 |
| SLC12A2   | -1,74052 | 1,83E-12 |
| SRXN1     | -1,74355 | 0,000225 |
| C10orf12  | -1,74458 | 8,90E-07 |
| KDM4C     | -1,74797 | 3,59E-08 |
| KLHL21    | -1,74834 | 9,80E-10 |
| AHI1      | -1,7507  | 2,56E-05 |
| MZF1      | -1,7522  | 1,56E-05 |
| RDH10     | -1,75366 | 9,01E-05 |
| ZDHHC23   | -1,75571 | 2,18E-05 |
| KSR2      | -1,75635 | 7,91E-05 |
| GLB1L2    | -1,75793 | 1,97E-08 |
| FAM8A1    | -1,75834 | 7,24E-09 |
| PRSS22    | -1,75941 | 0,000406 |
| POLR3G    | -1,75989 | 0,00071  |
| ARNT2     | -1,76192 | 9,37E-06 |
| NAB1      | -1,76381 | 8,76E-07 |
| RNF170    | -1,76554 | 1,22E-05 |
| RAB11FIP1 | -1,76652 | 1,80E-11 |
| MICAL1    | -1,76767 | 0,000265 |
| FNDC3A    | -1,76805 | 3,36E-12 |
| PTER      | -1,77503 | 9,32E-07 |
| TMEM41B   | -1,77804 | 1,09E-07 |
| TRPM2     | -1,78221 | 5,07E-08 |
| ST5       | -1,78602 | 5,67E-05 |
| BIK       | -1,78635 | 0,000475 |
| ENPP4     | -1,78846 | 8,89E-06 |
| SDCBP     | -1,79257 | 2,69E-05 |
| CASP3     | -1,79358 | 4,18E-06 |
| PODXL     | -1,80007 | 6,17E-10 |

|           |          |          |
|-----------|----------|----------|
| GANC      | -1,80053 | 9,62E-05 |
| SLC25A25  | -1,80414 | 7,35E-05 |
| BTN2A1    | -1,80523 | 0,000302 |
| HOXB7     | -1,80736 | 8,62E-06 |
| FHL3      | -1,81084 | 8,21E-08 |
| SNX30     | -1,81252 | 1,85E-07 |
| SLC41A2   | -1,81303 | 6,11E-07 |
| MFSD12    | -1,81425 | 7,01E-09 |
| TXNRD1    | -1,81757 | 7,15E-07 |
| NHSL1     | -1,81934 | 0,000492 |
| ZAK       | -1,82216 | 2,19E-11 |
| FUT11     | -1,82291 | 0,000327 |
| CDCA7     | -1,83032 | 8,79E-05 |
| TOX2      | -1,83044 | 7,66E-05 |
| PSIP1     | -1,83113 | 2,51E-06 |
| RAVER2    | -1,83359 | 7,90E-07 |
| ZIC2      | -1,83802 | 3,46E-05 |
| PARP8     | -1,83895 | 0,000226 |
| OSBP2     | -1,83976 | 1,76E-08 |
| RRAGD     | -1,84433 | 3,47E-05 |
| SDE2      | -1,8458  | 3,84E-05 |
| PARP12    | -1,8473  | 0,000186 |
| SLC18B1   | -1,84755 | 2,61E-07 |
| SEMA4F    | -1,84767 | 0,000857 |
| DNAJC3    | -1,84841 | 6,21E-08 |
| UBALD2    | -1,85041 | 0,000818 |
| PTRF      | -1,85236 | 4,30E-11 |
| NOL9      | -1,85263 | 2,24E-07 |
| FNTA      | -1,85479 | 1,09E-11 |
| PPARGC1B  | -1,85501 | 1,70E-05 |
| YAP1      | -1,85507 | 4,29E-12 |
| SCMH1     | -1,8588  | 0,000421 |
| UGGT2     | -1,8596  | 4,63E-07 |
| FKBP14    | -1,86041 | 4,54E-06 |
| FBXO41    | -1,86203 | 2,52E-10 |
| FGFRL1    | -1,86259 | 6,86E-15 |
| SETDB2    | -1,86534 | 5,94E-05 |
| LIN7C     | -1,86784 | 2,69E-08 |
| CCNO      | -1,86849 | 0,000336 |
| DOK3      | -1,87049 | 1,02E-05 |
| DEGS1     | -1,8712  | 4,26E-08 |
| HK2       | -1,87557 | 4,00E-06 |
| TNFRSF10A | -1,87828 | 3,44E-06 |
| DENND4C   | -1,88039 | 8,58E-12 |
| PDP2      | -1,88087 | 2,99E-07 |
| STARD4    | -1,8857  | 1,20E-07 |
| MICAL2    | -1,88587 | 2,47E-07 |
| CASC4     | -1,88768 | 1,31E-13 |
| ADCK3     | -1,88811 | 7,63E-07 |
| PERP      | -1,88849 | 1,63E-07 |

|          |          |          |
|----------|----------|----------|
| LGALS8   | -1,88862 | 6,84E-08 |
| SDCCAG8  | -1,88981 | 1,46E-06 |
| ZNF462   | -1,89238 | 1,06E-08 |
| FABP5    | -1,89292 | 6,62E-07 |
| GPR137B  | -1,89409 | 6,92E-06 |
| EOGT     | -1,89673 | 7,13E-05 |
| ELL2     | -1,89703 | 4,86E-06 |
| EIF2AK4  | -1,90306 | 7,27E-10 |
| IRF1     | -1,90394 | 1,47E-05 |
| DCP1A    | -1,90524 | 3,48E-08 |
| SLC5A3   | -1,90886 | 2,01E-11 |
| RPH3AL   | -1,90995 | 9,23E-06 |
| RABGGTB  | -1,91079 | 1,81E-12 |
| CBARP    | -1,9144  | 1,81E-05 |
| SLC12A8  | -1,91897 | 1,89E-06 |
| ALDH1B1  | -1,92259 | 1,24E-13 |
| ABHD3    | -1,92895 | 3,99E-07 |
| TCIRG1   | -1,93014 | 3,83E-10 |
| SIM2     | -1,93472 | 1,02E-05 |
| TGFA     | -1,9383  | 2,75E-05 |
| STXBP1   | -1,93976 | 4,37E-11 |
| MAFG     | -1,94174 | 5,36E-10 |
| SH2D4A   | -1,94292 | 6,16E-12 |
| HSPA12A  | -1,94604 | 1,00E-05 |
| TUBGCP6  | -1,94614 | 5,57E-08 |
| SHROOM1  | -1,94699 | 9,56E-09 |
| KLF3     | -1,94761 | 9,72E-08 |
| C15orf41 | -1,95844 | 0,000235 |
| MAPK8IP3 | -1,96135 | 0,000768 |
| SQRDL    | -1,96165 | 0,000323 |
| CCDC113  | -1,96389 | 3,89E-08 |
| EXTL2    | -1,96503 | 1,87E-06 |
| SNX9     | -1,96509 | 1,87E-12 |
| NCAPD3   | -1,9655  | 2,63E-10 |
| CBLC     | -1,966   | 3,79E-06 |
| CAMK1    | -1,96648 | 2,26E-05 |
| XRRA1    | -1,96722 | 1,87E-09 |
| APBA3    | -1,96768 | 3,52E-10 |
| FARP2    | -1,96799 | 3,65E-07 |
| PHKA1    | -1,96849 | 4,18E-08 |
| CLTCL1   | -1,97156 | 9,59E-05 |
| SOCS2    | -1,97185 | 0,000563 |
| SMC5     | -1,97293 | 2,15E-12 |
| PIM2     | -1,97365 | 2,80E-08 |
| ELK3     | -1,97376 | 0,000316 |
| TPP2     | -1,97498 | 1,93E-10 |
| ATP11A   | -1,97693 | 1,37E-10 |
| APOBEC3F | -1,97881 | 0,000295 |
| UGDH     | -1,98116 | 1,11E-06 |
| MFSD2A   | -1,98248 | 3,25E-10 |



|           |          |          |
|-----------|----------|----------|
| ZNF319    | -1,98401 | 0,000638 |
| OBSCN     | -1,98473 | 3,55E-05 |
| IFFO2     | -1,98538 | 1,36E-05 |
| POMK      | -1,98688 | 6,47E-05 |
| PTCH1     | -1,98697 | 7,25E-06 |
| SERPINB1  | -1,98713 | 4,30E-09 |
| LRP8      | -1,98771 | 1,50E-07 |
| ENDOD1    | -1,9892  | 5,82E-13 |
| VCL       | -1,99353 | 1,05E-07 |
| B4GALT5   | -1,99658 | 1,60E-14 |
| TXLNA     | -2,00077 | 9,06E-13 |
| PATL1     | -2,00089 | 3,99E-14 |
| ANO9      | -2,00171 | 1,70E-06 |
| SOCS6     | -2,00205 | 2,23E-11 |
| TFR2      | -2,00549 | 6,98E-05 |
| NEDD4L    | -2,00839 | 8,00E-10 |
| SATB2     | -2,01806 | 2,13E-11 |
| SERINC2   | -2,01866 | 2,60E-07 |
| EIF4A2    | -2,02365 | 1,65E-07 |
| ADCY7     | -2,02437 | 1,19E-08 |
| TIMP2     | -2,02544 | 1,88E-09 |
| TGDS      | -2,02626 | 0,000136 |
| MFGE8     | -2,02635 | 1,11E-09 |
| ST6GALNA4 | -2,02664 | 4,50E-10 |
| KPNA5     | -2,02726 | 0,000316 |
| LINC00641 | -2,02816 | 0,000199 |
| ZNF57     | -2,02941 | 4,19E-07 |
| DOCK1     | -2,02963 | 6,64E-10 |
| MYO1E     | -2,03357 | 1,60E-05 |
| ICA1L     | -2,03412 | 0,000135 |
| CAMKK1    | -2,03883 | 3,33E-06 |
| ADRBK2    | -2,04007 | 1,45E-13 |
| FLVCR1    | -2,04705 | 1,37E-08 |
| OXCT1     | -2,04927 | 3,95E-12 |
| LPCAT2    | -2,05493 | 2,59E-06 |
| MAPKBP1   | -2,05686 | 1,11E-06 |
| RNPEPL1   | -2,05722 | 1,50E-12 |
| ECHDC1    | -2,05887 | 8,93E-11 |
| CSRNP1    | -2,06135 | 6,69E-08 |
| INPP5J    | -2,06397 | 6,67E-05 |
| TMX3      | -2,0655  | 8,04E-11 |
| SPIN4     | -2,07781 | 1,04E-06 |
| GAS6      | -2,07809 | 4,53E-09 |
| MOB3C     | -2,08185 | 0,000461 |
| GJA3      | -2,08458 | 2,42E-09 |
| TP73      | -2,08858 | 0,000321 |
| RPS6KA2   | -2,08977 | 0,000764 |
| LTN1      | -2,09048 | 3,95E-08 |
| LPIN2     | -2,09317 | 9,38E-12 |
| BACH1     | -2,09682 | 6,21E-11 |

|          |          |          |
|----------|----------|----------|
| EPDR1    | -2,09963 | 3,14E-08 |
| GATA6    | -2,10082 | 1,06E-06 |
| SH3BGRL2 | -2,10474 | 3,41E-05 |
| SMCO4    | -2,1076  | 0,00068  |
| PMAIP1   | -2,10797 | 0,000106 |
| EPHX1    | -2,11047 | 3,79E-10 |
| GPR180   | -2,11047 | 1,71E-10 |
| STK17B   | -2,11562 | 1,24E-10 |
| CAV2     | -2,11975 | 7,75E-06 |
| GFPT1    | -2,12101 | 1,08E-06 |
| CARNMT1  | -2,12299 | 5,52E-07 |
| CDKL1    | -2,12388 | 0,000254 |
| KLF9     | -2,13118 | 0,000177 |
| ITGA2    | -2,13166 | 1,41E-08 |
| PSAT1    | -2,1337  | 2,26E-05 |
| ZMYM6NB  | -2,13439 | 5,24E-05 |
| CDC42BPA | -2,13712 | 9,01E-09 |
| SNHG3    | -2,13846 | 2,00E-09 |
| PAK1     | -2,14182 | 1,97E-08 |
| EFHD2    | -2,14375 | 3,14E-14 |
| TNS3     | -2,14578 | 1,42E-08 |
| HSD17B6  | -2,14699 | 0,000402 |
| SEL1L3   | -2,15059 | 1,16E-12 |
| PANK4    | -2,15332 | 6,10E-12 |
| SLC25A37 | -2,15529 | 1,49E-09 |
| SLC30A7  | -2,16006 | 4,99E-12 |
| ASIC1    | -2,16053 | 3,90E-05 |
| PDDC1    | -2,16718 | 1,26E-13 |
| SLC25A12 | -2,16763 | 6,64E-08 |
| C4orf32  | -2,17408 | 3,65E-07 |
| LDLRAP1  | -2,17505 | 1,06E-07 |
| EVI5     | -2,17531 | 2,78E-08 |
| CPD      | -2,17749 | 2,51E-18 |
| PPARA    | -2,17949 | 5,85E-09 |
| LOC90768 | -2,18088 | 2,43E-05 |
| PTPN14   | -2,18113 | 2,75E-14 |
| RPS6KA5  | -2,18596 | 5,73E-08 |
| FAM89A   | -2,18733 | 0,000623 |
| HERPUD1  | -2,18739 | 0,00049  |
| DGKD     | -2,19175 | 3,60E-14 |
| KLHL15   | -2,19404 | 9,12E-08 |
| SORL1    | -2,19908 | 1,95E-13 |
| MACC1    | -2,20028 | 0,000233 |
| KCNQ4    | -2,2007  | 0,000982 |
| GRB10    | -2,20273 | 0,000822 |
| DIXDC1   | -2,20464 | 3,18E-06 |
| PRTFDC1  | -2,20524 | 1,15E-07 |
| CHM      | -2,20803 | 7,92E-06 |
| CCDC82   | -2,21088 | 3,78E-05 |
| HYI      | -2,21899 | 1,42E-05 |

|          |          |          |
|----------|----------|----------|
| TIAM1    | -2,2227  | 9,65E-09 |
| SORBS1   | -2,22431 | 5,09E-07 |
| HSD17B12 | -2,22452 | 6,63E-20 |
| TTBK2    | -2,22531 | 2,11E-05 |
| SBF2     | -2,22742 | 4,25E-06 |
| PLEK2    | -2,23215 | 5,77E-08 |
| DUSP7    | -2,23644 | 4,36E-05 |
| GHDC     | -2,23753 | 1,31E-09 |
| FYN      | -2,24886 | 3,26E-05 |
| RIN3     | -2,24894 | 1,23E-07 |
| CAPN10   | -2,25213 | 1,65E-08 |
| SAMHD1   | -2,25383 | 7,51E-06 |
| SLC35G1  | -2,25477 | 0,00021  |
| FAF1     | -2,25649 | 4,92E-09 |
| ABCB10   | -2,25891 | 4,35E-09 |
| SH2D3A   | -2,26073 | 1,15E-08 |
| CTH      | -2,26097 | 1,23E-05 |
| ATAD5    | -2,26456 | 2,03E-07 |
| SOD2     | -2,26528 | 1,13E-12 |
| FAM92A1  | -2,26532 | 6,99E-05 |
| PTPRG    | -2,26543 | 3,14E-15 |
| KCTD17   | -2,26572 | 2,57E-07 |
| GATA2    | -2,2686  | 1,07E-05 |
| BCL2L2   | -2,27085 | 2,39E-12 |
| ABCC4    | -2,27281 | 7,33E-13 |
| CARD10   | -2,27441 | 6,77E-10 |
| CXCL16   | -2,27927 | 3,06E-16 |
| SNAI1    | -2,28002 | 7,51E-05 |
| CORO1A   | -2,28066 | 1,12E-05 |
| NUPL2    | -2,28253 | 1,84E-05 |
| BMP8B    | -2,28714 | 7,99E-07 |
| DAGLA    | -2,28765 | 1,11E-06 |
| ITGA3    | -2,29112 | 1,00E-20 |
| IFNGR2   | -2,29663 | 7,02E-12 |
| OAT      | -2,2987  | 1,14E-06 |
| SFXN3    | -2,30222 | 1,50E-07 |
| KLHL17   | -2,30256 | 8,64E-06 |
| HOOK1    | -2,30447 | 2,37E-18 |
| DUSP2    | -2,30859 | 1,06E-06 |
| ADGRG6   | -2,31599 | 5,32E-15 |
| DGKE     | -2,31772 | 4,39E-11 |
| ANKMY2   | -2,32385 | 4,69E-12 |
| RAB20    | -2,3259  | 4,55E-05 |
| SLC43A1  | -2,32594 | 5,79E-05 |
| MXRA7    | -2,32785 | 7,57E-10 |
| RCBTB1   | -2,33039 | 6,15E-16 |
| CDK6     | -2,3347  | 3,91E-05 |
| FAM160A1 | -2,33951 | 2,88E-07 |
| MRC2     | -2,34043 | 0,000258 |
| IFNGR1   | -2,3445  | 1,48E-09 |

|           |          |          |
|-----------|----------|----------|
| SPRY1     | -2,34492 | 0,00053  |
| DCBLD1    | -2,35436 | 4,09E-10 |
| GALT      | -2,3612  | 0,000396 |
| SNX25     | -2,36325 | 7,66E-12 |
| SMIM3     | -2,36874 | 4,63E-12 |
| ZFP36     | -2,369   | 3,62E-09 |
| BRWD3     | -2,36931 | 2,73E-07 |
| POU6F1    | -2,36943 | 0,00014  |
| CDPF1     | -2,37138 | 1,89E-07 |
| RASSF3    | -2,37473 | 9,23E-13 |
| DOCK5     | -2,38088 | 7,54E-15 |
| SSFA2     | -2,39261 | 9,80E-17 |
| IL27RA    | -2,40028 | 7,09E-16 |
| SCCPDH    | -2,403   | 5,64E-15 |
| KIF13B    | -2,40374 | 4,90E-06 |
| ME2       | -2,40414 | 5,44E-17 |
| SH3BP4    | -2,40591 | 3,70E-18 |
| TUBB2A    | -2,4063  | 4,75E-07 |
| TBC1D8B   | -2,41703 | 0,000304 |
| SLC16A14  | -2,4194  | 7,21E-08 |
| LCA5      | -2,42774 | 9,41E-05 |
| GPAT3     | -2,43031 | 3,45E-06 |
| GLS       | -2,43293 | 6,18E-20 |
| WWC2      | -2,43578 | 1,23E-18 |
| ITPKA     | -2,4373  | 1,17E-06 |
| FURIN     | -2,43915 | 3,84E-15 |
| DDAH1     | -2,44468 | 1,62E-09 |
| IL6ST     | -2,445   | 6,06E-20 |
| TNFRSF10B | -2,44568 | 8,21E-08 |
| ESAM      | -2,44629 | 0,000129 |
| RAPGEFL1  | -2,44815 | 7,79E-07 |
| BTG3      | -2,44883 | 2,15E-07 |
| TUBE1     | -2,44947 | 3,32E-06 |
| SPNS2     | -2,44999 | 0,000162 |
| TUBA8     | -2,45068 | 6,00E-06 |
| RASGRP1   | -2,45978 | 0,000334 |
| TRMT11    | -2,46015 | 3,62E-06 |
| PTGR1     | -2,46358 | 4,19E-09 |
| LIX1L     | -2,46457 | 0,000465 |
| SHROOM2   | -2,46898 | 7,10E-10 |
| FUT1      | -2,47071 | 0,000171 |
| KLHL29    | -2,47291 | 4,50E-06 |
| ADCY9     | -2,4779  | 1,15E-13 |
| NCOA7     | -2,47867 | 2,62E-10 |
| METTTL7B  | -2,47926 | 6,01E-09 |
| SLC1A3    | -2,48221 | 8,35E-05 |
| SLC8B1    | -2,48358 | 2,39E-12 |
| GSDMD     | -2,48867 | 1,37E-06 |
| TNRC6C-AS | -2,49004 | 0,000358 |
| HLA-C     | -2,49288 | 6,60E-06 |

|           |          |          |
|-----------|----------|----------|
| ADAM9     | -2,49602 | 7,93E-27 |
| NKX3-1    | -2,49694 | 4,16E-08 |
| LBX2-AS1  | -2,5025  | 0,000316 |
| PLEKHG1   | -2,50708 | 0,000783 |
| ACSL4     | -2,50783 | 4,54E-14 |
| KBTBD11   | -2,50783 | 2,87E-07 |
| HPSE      | -2,51161 | 9,18E-07 |
| UNC13D    | -2,51212 | 0,000246 |
| PRNP      | -2,51245 | 3,36E-11 |
| SNORA73A  | -2,51625 | 0,000397 |
| APOBEC3B  | -2,518   | 9,23E-13 |
| CPOX      | -2,52658 | 8,38E-08 |
| ARAP2     | -2,53172 | 2,33E-11 |
| SLCO4A1   | -2,53193 | 1,77E-10 |
| MAMDC4    | -2,53587 | 0,000318 |
| HLA-F     | -2,53955 | 4,99E-05 |
| DIAPH2    | -2,53985 | 1,14E-14 |
| MICB      | -2,54665 | 2,35E-07 |
| ADAP2     | -2,54869 | 1,51E-06 |
| SERPINB8  | -2,55944 | 5,51E-05 |
| CHIC1     | -2,56434 | 9,33E-07 |
| FOXD1     | -2,57167 | 0,000325 |
| HSD17B1   | -2,57774 | 2,95E-10 |
| CAMK2D    | -2,57982 | 4,45E-13 |
| KIAA1804  | -2,58011 | 7,44E-09 |
| LBR       | -2,58012 | 5,65E-17 |
| RTN4RL2   | -2,58313 | 0,000913 |
| SLC52A3   | -2,58445 | 1,25E-05 |
| SLC39A14  | -2,58486 | 1,12E-09 |
| KCNK5     | -2,58536 | 2,66E-06 |
| DCBLD2    | -2,5872  | 1,48E-07 |
| GPC1      | -2,59115 | 9,26E-22 |
| NIPAL3    | -2,59295 | 7,80E-11 |
| VPS13C    | -2,60397 | 4,68E-17 |
| ZBTB47    | -2,60437 | 0,000351 |
| MCF2L     | -2,60447 | 8,53E-10 |
| MCF2L-AS1 | -2,60522 | 0,000454 |
| PRPS2     | -2,60582 | 1,69E-19 |
| GK        | -2,60889 | 1,05E-09 |
| CIRBP-AS1 | -2,61801 | 0,000406 |
| ADGRE5    | -2,62016 | 9,68E-12 |
| MYB       | -2,63801 | 2,50E-10 |
| IFIT5     | -2,63849 | 1,73E-08 |
| PAQR5     | -2,64026 | 7,78E-17 |
| MTCL1     | -2,64044 | 1,19E-08 |
| CYP27B1   | -2,64878 | 0,00054  |
| MLXIPL    | -2,65227 | 0,00019  |
| REEP2     | -2,65397 | 2,25E-09 |
| NFKBIA    | -2,66128 | 2,49E-14 |
| AIM1L     | -2,66692 | 0,000105 |

|           |          |          |
|-----------|----------|----------|
| GNPDA2    | -2,66966 | 1,30E-08 |
| ZNF589    | -2,67172 | 6,60E-15 |
| SGMS2     | -2,67581 | 4,89E-09 |
| IFNLR1    | -2,6764  | 3,37E-09 |
| RTTN      | -2,68151 | 1,90E-10 |
| CCDC3     | -2,68749 | 1,19E-06 |
| ABHD6     | -2,68842 | 2,36E-09 |
| COCH      | -2,69262 | 9,09E-07 |
| MX1       | -2,69422 | 7,40E-06 |
| ACOT11    | -2,69824 | 0,000254 |
| LRRC75A   | -2,70716 | 3,82E-05 |
| HDAC4     | -2,71021 | 3,33E-05 |
| TK2       | -2,71341 | 2,05E-09 |
| CNTLN     | -2,71473 | 8,47E-11 |
| GJB2      | -2,71995 | 1,60E-14 |
| LOC284023 | -2,72979 | 1,70E-06 |
| ATP8A1    | -2,73419 | 5,00E-07 |
| SCNN1A    | -2,73479 | 0,00014  |
| SOWAHC    | -2,7375  | 8,25E-12 |
| OPTN      | -2,73816 | 1,60E-06 |
| HBEGF     | -2,74703 | 0,000175 |
| FHOD3     | -2,75206 | 0,000673 |
| SLC25A22  | -2,75922 | 1,05E-17 |
| SEMA3B    | -2,76265 | 1,05E-09 |
| PM20D2    | -2,77115 | 4,65E-15 |
| FOXO1     | -2,77709 | 1,89E-07 |
| TAPBPL    | -2,77882 | 0,000186 |
| RAB11FIP5 | -2,78445 | 1,19E-08 |
| NFKBID    | -2,79229 | 0,000137 |
| ITPRIPL2  | -2,79484 | 6,20E-26 |
| C1orf106  | -2,79535 | 2,88E-11 |
| SGTB      | -2,79858 | 2,41E-10 |
| PLCXD1    | -2,79953 | 5,55E-12 |
| FRAS1     | -2,8084  | 1,85E-28 |
| RAPGEF5   | -2,82033 | 9,32E-09 |
| PRRG4     | -2,82049 | 2,80E-08 |
| CENPV     | -2,82147 | 3,19E-09 |
| SPRY2     | -2,83317 | 1,97E-09 |
| ARPIN     | -2,83718 | 6,19E-10 |
| SNX10     | -2,83828 | 4,95E-14 |
| SUSD1     | -2,8423  | 4,06E-15 |
| TRAF5     | -2,84581 | 1,47E-17 |
| HOOK3     | -2,84585 | 1,79E-20 |
| DNMBP     | -2,84869 | 2,68E-17 |
| C11orf54  | -2,858   | 1,38E-14 |
| TMEM56    | -2,859   | 6,17E-14 |
| CD27-AS1  | -2,86318 | 0,000674 |
| NDRG1     | -2,86498 | 2,99E-12 |
| NMNAT3    | -2,87135 | 6,50E-06 |
| KBTBD8    | -2,87302 | 2,31E-05 |

|          |          |          |
|----------|----------|----------|
| MOCOS    | -2,87379 | 1,35E-10 |
| NUAK2    | -2,87514 | 2,83E-11 |
| ECE1     | -2,87558 | 3,78E-25 |
| CHST3    | -2,87728 | 5,33E-05 |
| KLF12    | -2,8832  | 2,18E-13 |
| GOLM1    | -2,88622 | 4,84E-30 |
| ZC3H12A  | -2,89681 | 6,16E-13 |
| PHLDA2   | -2,9009  | 2,12E-09 |
| DUSP28   | -2,90127 | 0,000711 |
| ANK2     | -2,92312 | 0,000164 |
| TGFBR3   | -2,92655 | 7,77E-05 |
| FERMT1   | -2,92751 | 5,43E-24 |
| SLC16A9  | -2,93583 | 2,40E-14 |
| NFKB1    | -2,93841 | 4,93E-16 |
| CRIM1    | -2,94964 | 5,18E-12 |
| DNHD1    | -2,95237 | 1,77E-05 |
| DSE      | -2,95707 | 4,27E-09 |
| WBSCR27  | -2,96198 | 8,20E-06 |
| INSR     | -2,97487 | 9,52E-19 |
| RAMP1    | -2,97538 | 9,24E-10 |
| TRIP10   | -2,97855 | 7,41E-16 |
| PLIN4    | -2,99543 | 0,000273 |
| ADGRF4   | -2,99625 | 0,000495 |
| LGALS3BP | -2,9996  | 2,24E-06 |
| CRACR2A  | -3,00054 | 4,45E-05 |
| CDC42EP3 | -3,00092 | 6,65E-19 |
| HHEX     | -3,00454 | 3,64E-06 |
| ATF7IP2  | -3,01029 | 8,79E-05 |
| ZNF264   | -3,02699 | 1,65E-09 |
| OAF      | -3,03024 | 1,16E-13 |
| MMP24    | -3,03267 | 9,94E-05 |
| LIPH     | -3,03669 | 1,84E-05 |
| ALDH3B1  | -3,05807 | 1,74E-06 |
| TBC1D4   | -3,06411 | 1,20E-11 |
| MORC4    | -3,06665 | 1,31E-36 |
| PROCR    | -3,0723  | 0,000126 |
| FXYD5    | -3,07312 | 6,42E-27 |
| C19orf66 | -3,07955 | 1,48E-06 |
| ATHL1    | -3,0809  | 1,28E-09 |
| CD83     | -3,08332 | 1,17E-10 |
| GLS2     | -3,09017 | 5,17E-28 |
| STEAP1   | -3,09439 | 1,31E-05 |
| NFAT5    | -3,09756 | 1,09E-20 |
| LYST     | -3,10057 | 1,94E-10 |
| FAM169A  | -3,11048 | 8,84E-10 |
| FNIP2    | -3,1165  | 2,00E-08 |
| ITGA5    | -3,11731 | 6,75E-18 |
| SLC17A5  | -3,11816 | 2,31E-16 |
| PLEKHA2  | -3,12516 | 1,37E-16 |
| FAM63B   | -3,13138 | 1,41E-11 |

|          |          |          |
|----------|----------|----------|
| IGF2BP2  | -3,13908 | 5,26E-21 |
| HSH2D    | -3,14921 | 9,86E-06 |
| F2RL1    | -3,14979 | 2,08E-18 |
| NFKB2    | -3,15197 | 1,31E-32 |
| PLAGL1   | -3,18716 | 8,27E-18 |
| PMP22    | -3,20023 | 2,01E-07 |
| ADM      | -3,21282 | 0,000602 |
| RHEBL1   | -3,21288 | 2,73E-05 |
| FAM171A1 | -3,22029 | 2,03E-20 |
| ATP2A1   | -3,22257 | 0,000617 |
| TIMP1    | -3,22288 | 9,44E-09 |
| PGM1     | -3,22685 | 7,20E-22 |
| XK       | -3,22715 | 2,69E-18 |
| SLC9A5   | -3,22719 | 7,01E-05 |
| IRF5     | -3,24035 | 8,84E-17 |
| IL18     | -3,25941 | 0,000154 |
| HERC5    | -3,27179 | 0,0005   |
| IL15RA   | -3,29544 | 4,92E-13 |
| CBX7     | -3,29778 | 2,25E-07 |
| EHF      | -3,29991 | 1,22E-15 |
| HPGD     | -3,3043  | 0,000968 |
| GULP1    | -3,30507 | 3,19E-14 |
| TAGLN    | -3,3057  | 3,66E-06 |
| BMP4     | -3,30753 | 4,84E-18 |
| PLK3     | -3,31056 | 1,47E-12 |
| VWDE     | -3,31341 | 1,62E-06 |
| ADAP1    | -3,32313 | 4,92E-24 |
| HNRNPU-A | -3,32897 | 1,37E-08 |
| PLBD1    | -3,33387 | 8,59E-17 |
| CLIP2    | -3,33892 | 3,21E-38 |
| TRAF1    | -3,34324 | 1,18E-07 |
| APC2     | -3,34343 | 6,15E-08 |
| MAPRE2   | -3,34568 | 6,92E-17 |
| HSD17B11 | -3,35045 | 1,65E-13 |
| SNX7     | -3,35258 | 1,31E-13 |
| ANXA1    | -3,35367 | 1,80E-11 |
| RILPL2   | -3,35943 | 1,95E-10 |
| CCDC68   | -3,35951 | 4,76E-05 |
| ACO1     | -3,36008 | 4,67E-21 |
| ALOXE3   | -3,37134 | 1,09E-13 |
| SLC12A4  | -3,37478 | 9,32E-08 |
| TFCP2L1  | -3,37772 | 0,000322 |
| PARM1    | -3,38181 | 2,04E-08 |
| FAHD2B   | -3,3833  | 1,16E-14 |
| ADORA2B  | -3,39249 | 2,43E-15 |
| B3GNT9   | -3,39573 | 8,77E-06 |
| FAM149A  | -3,40064 | 0,000948 |
| RBMS2    | -3,40324 | 3,49E-20 |
| LGALS3   | -3,41367 | 3,94E-19 |
| TMEM51-A | -3,41378 | 0,000446 |



|           |          |          |
|-----------|----------|----------|
| CNTD2     | -3,41483 | 7,66E-05 |
| SASH1     | -3,42686 | 4,41E-13 |
| BCL2L15   | -3,42965 | 2,34E-06 |
| CCDC69    | -3,43733 | 8,99E-12 |
| FAM135A   | -3,45014 | 4,66E-21 |
| PDE2A     | -3,45442 | 0,000175 |
| WNT5B     | -3,45532 | 8,06E-08 |
| ZNF814    | -3,47568 | 3,23E-08 |
| SERAC1    | -3,49262 | 2,38E-21 |
| ARNTL2    | -3,49858 | 2,48E-24 |
| SLC22A15  | -3,50259 | 1,07E-05 |
| TSPAN1    | -3,51577 | 3,54E-06 |
| ASPH      | -3,51648 | 2,42E-23 |
| TMEM221   | -3,52256 | 0,000154 |
| UPP1      | -3,52501 | 3,16E-08 |
| GPR63     | -3,53582 | 1,15E-10 |
| SDC4      | -3,53921 | 4,77E-15 |
| FN3K      | -3,55129 | 5,85E-10 |
| SRPX      | -3,55196 | 2,41E-07 |
| RPS6KA6   | -3,5536  | 2,24E-09 |
| ULBP3     | -3,55976 | 4,09E-07 |
| LRRC8C    | -3,56105 | 3,26E-15 |
| FBXO2     | -3,56567 | 2,22E-13 |
| IER3      | -3,57213 | 2,61E-16 |
| SP100     | -3,57286 | 2,59E-05 |
| DPY19L2P2 | -3,57774 | 2,17E-07 |
| SLC30A4   | -3,58284 | 0,000177 |
| C16orf62  | -3,58832 | 5,11E-31 |
| DDN       | -3,6028  | 4,33E-06 |
| IZUMO1    | -3,62035 | 1,18E-12 |
| KLK1      | -3,62895 | 0,000304 |
| ALDH3A1   | -3,63151 | 1,63E-06 |
| SCNN1D    | -3,63319 | 4,12E-09 |
| MCIDAS    | -3,6497  | 3,54E-06 |
| C3        | -3,66677 | 0,000474 |
| CHRNA1    | -3,66762 | 2,05E-12 |
| NAPRT     | -3,67062 | 5,34E-24 |
| C9orf72   | -3,68903 | 1,54E-06 |
| SLC16A2   | -3,70363 | 9,58E-09 |
| HOXA11    | -3,71052 | 1,26E-07 |
| ANXA3     | -3,71222 | 1,16E-20 |
| PLCE1     | -3,71761 | 5,38E-05 |
| TYW1B     | -3,72304 | 3,57E-08 |
| ATAD3B    | -3,72631 | 2,40E-17 |
| SPATA3-AS | -3,72823 | 5,49E-05 |
| ITGA6     | -3,75076 | 6,42E-27 |
| PSMB9     | -3,76306 | 1,24E-07 |
| HERC2P3   | -3,77126 | 1,11E-06 |
| ZNF702P   | -3,77318 | 2,05E-11 |
| JAG1      | -3,77797 | 1,52E-40 |

|           |          |          |
|-----------|----------|----------|
| WLS       | -3,78813 | 8,44E-27 |
| STARD9    | -3,79887 | 6,99E-09 |
| LIMCH1    | -3,79925 | 2,10E-11 |
| CPVL      | -3,80077 | 2,05E-07 |
| BHLHA15   | -3,80353 | 3,52E-08 |
| ERRFI1    | -3,81226 | 1,16E-12 |
| FUT4      | -3,81387 | 5,05E-19 |
| IL4R      | -3,81622 | 3,15E-21 |
| HLA-B     | -3,83615 | 1,91E-12 |
| CEACAM19  | -3,8399  | 8,91E-10 |
| RELB      | -3,84976 | 3,62E-20 |
| RASGRF2   | -3,85115 | 2,36E-05 |
| RNF207    | -3,85203 | 1,19E-11 |
| PXK       | -3,8564  | 2,26E-10 |
| DPYSL3    | -3,85694 | 3,20E-15 |
| FRMD5     | -3,85803 | 9,43E-23 |
| FAM124A   | -3,86999 | 9,67E-05 |
| MAP3K8    | -3,87189 | 1,33E-12 |
| ST3GAL2   | -3,87221 | 1,12E-15 |
| NYAP1     | -3,8749  | 1,01E-06 |
| LINC01315 | -3,89466 | 5,21E-06 |
| TRPV1     | -3,90082 | 7,73E-10 |
| ST6GALNA4 | -3,908   | 4,70E-22 |
| PRKCA     | -3,90984 | 8,95E-22 |
| FER1L4    | -3,92856 | 3,74E-09 |
| FAM13A    | -3,94867 | 1,21E-16 |
| TRIM47    | -3,94969 | 3,96E-30 |
| SERPINE2  | -3,95866 | 2,04E-17 |
| EPHX4     | -3,97181 | 7,37E-09 |
| SPTBN5    | -3,97793 | 0,000144 |
| SOX7      | -3,98097 | 7,77E-07 |
| CADPS2    | -3,9857  | 6,19E-06 |
| EML5      | -3,99709 | 9,87E-12 |
| AKAP12    | -4,00625 | 1,54E-21 |
| APOLD1    | -4,00773 | 2,16E-05 |
| CD74      | -4,01019 | 7,40E-07 |
| KCNQ1     | -4,03685 | 1,64E-06 |
| AKAP7     | -4,04986 | 5,60E-09 |
| JAZF1     | -4,05751 | 7,14E-08 |
| MBP       | -4,05842 | 2,21E-28 |
| TNS4      | -4,06794 | 1,93E-07 |
| SEPT10    | -4,08229 | 2,50E-19 |
| WDR90     | -4,09486 | 1,27E-29 |
| FAM222A-1 | -4,11737 | 7,40E-05 |
| CMTM7     | -4,12574 | 2,50E-26 |
| TGFB111   | -4,13731 | 2,55E-05 |
| SH2B3     | -4,14482 | 5,04E-48 |
| STX11     | -4,14625 | 2,17E-05 |
| LRRK1     | -4,15127 | 2,81E-24 |
| HES7      | -4,15211 | 8,23E-14 |

|           |          |          |
|-----------|----------|----------|
| IL20RA    | -4,15677 | 2,16E-14 |
| FUT3      | -4,15867 | 7,49E-09 |
| GABARAPL  | -4,17218 | 6,39E-09 |
| IGFL2     | -4,17539 | 7,01E-12 |
| RGL3      | -4,17665 | 1,52E-06 |
| C3orf52   | -4,17721 | 2,72E-07 |
| C3orf18   | -4,18737 | 9,49E-08 |
| F3        | -4,22096 | 4,52E-24 |
| PLA2G16   | -4,2254  | 7,92E-18 |
| FAT1      | -4,23718 | 2,04E-40 |
| CYP4V2    | -4,24917 | 3,61E-11 |
| HLA-A     | -4,25773 | 2,38E-43 |
| ARHGAP23  | -4,27516 | 1,13E-16 |
| UBASH3B   | -4,27805 | 1,09E-24 |
| FAM83F    | -4,32035 | 1,02E-12 |
| EPHA2     | -4,32446 | 2,40E-28 |
| PPM1K     | -4,33079 | 8,47E-15 |
| QPCT      | -4,33256 | 1,18E-26 |
| BDKRB2    | -4,3335  | 8,84E-07 |
| ANKRD29   | -4,34766 | 3,89E-10 |
| FHL2      | -4,3606  | 1,47E-12 |
| B3GNT5    | -4,37197 | 1,19E-09 |
| NRP2      | -4,3783  | 1,20E-12 |
| PDE8B     | -4,37917 | 6,76E-06 |
| IGFL4     | -4,41236 | 0,000447 |
| SH3RF2    | -4,41276 | 2,40E-20 |
| VWA5B2    | -4,41858 | 0,000445 |
| VWA2      | -4,4226  | 1,56E-13 |
| ZNF513    | -4,4409  | 2,03E-12 |
| HOXA7     | -4,4542  | 4,19E-09 |
| SEC31B    | -4,50459 | 0,000396 |
| RASIP1    | -4,52925 | 5,50E-10 |
| ANKRD33B  | -4,55089 | 1,08E-07 |
| SERPINE1  | -4,56709 | 7,27E-07 |
| LINC00673 | -4,57462 | 5,69E-06 |
| PLAUR     | -4,57582 | 1,55E-14 |
| TESC      | -4,58217 | 1,07E-39 |
| SPRED1    | -4,60164 | 3,31E-24 |
| NR4A3     | -4,61093 | 2,25E-10 |
| STAMBPL1  | -4,63879 | 4,88E-19 |
| KHDRBS3   | -4,64457 | 2,65E-06 |
| PELI1     | -4,64988 | 1,04E-30 |
| C14orf159 | -4,65358 | 8,60E-31 |
| SLC1A1    | -4,65977 | 4,15E-15 |
| SNORD30   | -4,66946 | 0,000857 |
| MYH15     | -4,67273 | 3,09E-05 |
| NOD2      | -4,68202 | 2,26E-08 |
| ARHGAP40  | -4,71015 | 5,66E-05 |
| XDH       | -4,71497 | 0,000457 |
| ULBP2     | -4,71536 | 2,33E-10 |

|           |          |          |
|-----------|----------|----------|
| HOXC8     | -4,73061 | 3,96E-11 |
| CNTNAP1   | -4,74536 | 4,29E-38 |
| IL22RA1   | -4,77275 | 2,93E-06 |
| MCOLN2    | -4,78203 | 2,69E-18 |
| AMPD3     | -4,78806 | 5,67E-32 |
| LOC10013C | -4,79081 | 2,62E-15 |
| EVA1C     | -4,84    | 5,85E-26 |
| LAMC2     | -4,8471  | 2,35E-32 |
| CAPN2     | -4,8514  | 2,99E-26 |
| HOXA13    | -4,87311 | 1,35E-05 |
| PDE10A    | -4,89094 | 0,000138 |
| HOXD11    | -4,89873 | 1,23E-07 |
| PITX2     | -4,94484 | 2,43E-31 |
| TUBA4A    | -4,95151 | 1,90E-19 |
| GJB3      | -4,975   | 8,55E-18 |
| SGPP2     | -4,98018 | 2,86E-32 |
| ARHGEF40  | -4,986   | 1,00E-16 |
| DUSP6     | -4,99319 | 5,00E-08 |
| KIFC3     | -5,00167 | 5,15E-18 |
| KLF15     | -5,01642 | 1,59E-14 |
| PDCL3P4   | -5,02593 | 8,19E-06 |
| GNB3      | -5,05157 | 0,000155 |
| TOR4A     | -5,05999 | 4,03E-58 |
| SLC45A1   | -5,06775 | 0,000512 |
| EGFR      | -5,07421 | 4,57E-53 |
| PLAC8     | -5,09172 | 2,89E-05 |
| CORO2B    | -5,09953 | 1,15E-10 |
| TRANK1    | -5,11314 | 3,16E-08 |
| SERPINB9  | -5,11534 | 1,61E-33 |
| HCP5      | -5,12198 | 2,17E-07 |
| HNF4G     | -5,13741 | 1,45E-20 |
| GNAL      | -5,16116 | 6,80E-45 |
| PNMA2     | -5,18261 | 2,70E-18 |
| MID1      | -5,18538 | 1,06E-21 |
| GFI1      | -5,21092 | 2,86E-12 |
| MAFF      | -5,21393 | 7,51E-09 |
| CD274     | -5,22275 | 1,30E-05 |
| LIF       | -5,2846  | 6,19E-18 |
| TNFAIP3   | -5,29813 | 1,72E-40 |
| STK32A    | -5,32547 | 0,000194 |
| TNNC1     | -5,32597 | 6,04E-11 |
| FOSL1     | -5,33083 | 2,72E-38 |
| RIN1      | -5,35273 | 1,89E-37 |
| TMEM98    | -5,36971 | 5,50E-36 |
| DAPK1     | -5,37567 | 3,70E-10 |
| SCG5      | -5,38662 | 1,43E-05 |
| PIK3AP1   | -5,40227 | 3,63E-19 |
| KIF7      | -5,4074  | 0,000259 |
| SATB1     | -5,43115 | 8,27E-10 |
| NCR3LG1   | -5,43222 | 8,97E-43 |

|           |          |          |
|-----------|----------|----------|
| FAM184A   | -5,43231 | 1,67E-06 |
| NPHS1     | -5,44178 | 3,04E-14 |
| NAP1L5    | -5,47704 | 1,12E-07 |
| PROS1     | -5,48901 | 5,21E-20 |
| CA2       | -5,49616 | 4,63E-16 |
| HOXB13    | -5,51505 | 1,57E-15 |
| SLC2A3    | -5,51639 | 1,59E-17 |
| LAT2      | -5,53163 | 8,06E-08 |
| PLEKHA4   | -5,55802 | 3,56E-27 |
| PCSK5     | -5,55836 | 1,20E-05 |
| MPP1      | -5,58069 | 8,72E-21 |
| SRMS      | -5,59012 | 1,99E-09 |
| ILDR2     | -5,59481 | 4,80E-09 |
| YOD1      | -5,60098 | 7,23E-24 |
| CRYBG3    | -5,63652 | 6,12E-37 |
| EPB41L2   | -5,63705 | 1,52E-79 |
| MEIS2     | -5,67206 | 8,08E-09 |
| PLCL2     | -5,67506 | 5,64E-08 |
| ETV4      | -5,67571 | 4,24E-18 |
| TPM2      | -5,6791  | 4,34E-27 |
| CR2       | -5,68404 | 1,14E-27 |
| ACOT2     | -5,69552 | 3,74E-14 |
| MTAP      | -5,71326 | 5,08E-26 |
| SH3RF3    | -5,7168  | 3,69E-11 |
| PRRT3-AS1 | -5,74534 | 2,56E-07 |
| MOB3B     | -5,75927 | 3,56E-09 |
| TLE6      | -5,76722 | 0,000455 |
| GSTM2     | -5,77807 | 0,000197 |
| ME3       | -5,78285 | 1,11E-17 |
| CX3CL1    | -5,7859  | 2,49E-10 |
| SGSM1     | -5,8132  | 3,57E-09 |
| LYN       | -5,84898 | 4,00E-40 |
| CRAT      | -5,85987 | 1,91E-25 |
| APOL6     | -5,8817  | 3,44E-37 |
| EMP1      | -5,89723 | 0,000791 |
| CASP10    | -5,90242 | 2,40E-20 |
| ANKRD22   | -5,90689 | 1,25E-09 |
| CLMP      | -5,91883 | 3,41E-07 |
| DPP4      | -5,92046 | 2,51E-11 |
| AMN       | -5,92084 | 1,22E-05 |
| GAL3ST2   | -5,9316  | 3,53E-09 |
| C6orf223  | -5,93908 | 9,47E-13 |
| BZRAP1    | -5,95224 | 3,54E-09 |
| EPAS1     | -5,95409 | 1,16E-25 |
| ETV7      | -5,965   | 1,51E-17 |
| MST1R     | -5,97141 | 9,81E-49 |
| ELFN1-AS1 | -5,9836  | 1,31E-17 |
| SPRY4     | -6,0046  | 1,58E-43 |
| RASSF6    | -6,01148 | 3,00E-06 |
| TLR2      | -6,03156 | 1,66E-10 |

|           |          |           |
|-----------|----------|-----------|
| SNPH      | -6,03297 | 3,40E-06  |
| CSF1      | -6,06801 | 3,79E-61  |
| SOX8      | -6,09434 | 2,94E-06  |
| NFKBIZ    | -6,09456 | 1,12E-31  |
| RGS11     | -6,10403 | 7,48E-05  |
| ERAP2     | -6,11696 | 5,29E-36  |
| NPIPA5    | -6,17999 | 1,52E-09  |
| UCA1      | -6,18489 | 0,000283  |
| ARSJ      | -6,18637 | 1,20E-06  |
| HOXB6     | -6,20374 | 2,40E-22  |
| ZBTB18    | -6,22223 | 8,23E-28  |
| DGKG      | -6,22389 | 3,40E-05  |
| PAK6      | -6,23015 | 2,88E-39  |
| PPP1R14C  | -6,26818 | 1,04E-09  |
| INPP1     | -6,27813 | 5,94E-19  |
| HOXD10    | -6,29922 | 2,25E-05  |
| NLRC5     | -6,3077  | 5,40E-29  |
| SPTB      | -6,31074 | 7,60E-25  |
| ZC3H12C   | -6,33273 | 7,30E-41  |
| TRIM38    | -6,35262 | 3,26E-13  |
| HOXB4     | -6,41528 | 8,38E-11  |
| TRABD2A   | -6,4191  | 1,21E-17  |
| CACNB4    | -6,41992 | 2,45E-22  |
| KLK10     | -6,42881 | 6,64E-09  |
| ARMCX4    | -6,54363 | 1,14E-10  |
| HOXB9     | -6,56804 | 1,91E-06  |
| GLI2      | -6,60472 | 1,03E-11  |
| TMEM173   | -6,63724 | 1,72E-15  |
| PALD1     | -6,64418 | 1,25E-110 |
| COL4A2    | -6,65634 | 1,02E-28  |
| FAM65B    | -6,68324 | 0,000753  |
| HNF4A     | -6,68926 | 1,25E-29  |
| MCTP2     | -6,71872 | 7,47E-20  |
| RNF217    | -6,74076 | 3,63E-09  |
| ERO1B     | -6,77837 | 8,73E-24  |
| ACY3      | -6,79439 | 0,000821  |
| OSBPL3    | -6,795   | 1,00E-30  |
| ZDHHC2    | -6,79659 | 3,40E-46  |
| STAT5A    | -6,82889 | 2,68E-05  |
| ZNF71     | -6,88119 | 5,29E-07  |
| BIN1      | -6,89757 | 6,66E-76  |
| LCN2      | -6,92761 | 2,66E-07  |
| BIRC3     | -6,93893 | 1,59E-30  |
| TMEM200E  | -6,94078 | 9,30E-18  |
| LINC01138 | -7,02913 | 1,67E-07  |
| PEAR1     | -7,15015 | 0,000138  |
| RAET1L    | -7,17447 | 0,00013   |
| C1QTNF1   | -7,21212 | 1,91E-16  |
| ZNF426    | -7,24091 | 1,69E-16  |
| APOBEC3C  | -7,24194 | 3,06E-23  |

|           |          |          |
|-----------|----------|----------|
| USP32P1   | -7,27813 | 8,32E-05 |
| TLE4      | -7,2969  | 9,55E-05 |
| ETV5      | -7,32036 | 3,07E-53 |
| CD14      | -7,37847 | 1,19E-08 |
| JSRP1     | -7,3902  | 0,000119 |
| TNC       | -7,40136 | 8,65E-05 |
| ZC4H2     | -7,42415 | 4,80E-09 |
| TFCP2     | -7,42555 | 0,000816 |
| ZNF717    | -7,45689 | 9,75E-09 |
| ALDH1L1   | -7,56361 | 1,59E-25 |
| LINC00857 | -7,5881  | 3,00E-09 |
| CTGLF12P  | -7,59247 | 0,000563 |
| EPHA1-AS1 | -7,606   | 0,00052  |
| ZNF69     | -7,60861 | 0,00053  |
| CARD6     | -7,6145  | 0,000502 |
| TMEM200A  | -7,61538 | 0,000785 |
| C2orf70   | -7,61614 | 0,000489 |
| NEK9      | -7,6174  | 1,47E-05 |
| IL32      | -7,62591 | 1,11E-08 |
| ERICH5    | -7,64403 | 3,28E-17 |
| DPYD      | -7,72141 | 0,000349 |
| ONECUT3   | -7,72414 | 0,000353 |
| BTBD19    | -7,72546 | 1,32E-05 |
| NPR2      | -7,74339 | 2,22E-05 |
| OSR1      | -7,74425 | 1,24E-05 |
| DEPDC7    | -7,76641 | 0,000258 |
| FOXQ1     | -7,78447 | 1,33E-19 |
| GRIN2B    | -7,78938 | 0,000273 |
| TNFRSF14  | -7,79536 | 3,70E-10 |
| FBLN7     | -7,81248 | 0,000461 |
| HS3ST1    | -7,82129 | 9,19E-06 |
| SLC38A8   | -7,86371 | 0,000421 |
| LOC389602 | -7,88205 | 0,000154 |
| TRIM15    | -7,89495 | 1,23E-35 |
| CA9       | -7,90636 | 6,00E-19 |
| LIPE      | -7,92448 | 1,75E-10 |
| PVRL3     | -7,9329  | 0,000129 |
| ICAM1     | -7,93354 | 8,98E-49 |
| KCNE3     | -7,98363 | 5,11E-06 |
| HOXD-AS2  | -7,99688 | 9,19E-05 |
| ADAM21    | -8,01326 | 0,000101 |
| CTS2      | -8,01832 | 4,61E-55 |
| RARRES1   | -8,01874 | 0,00015  |
| CD6       | -8,03076 | 0,000138 |
| BHLHE41   | -8,04984 | 5,00E-06 |
| ITGAX     | -8,08215 | 0,000107 |
| ACSL5     | -8,08725 | 2,33E-53 |
| C8orf31   | -8,1095  | 5,49E-05 |
| MIR31HG   | -8,11873 | 5,33E-05 |
| PDZK1IP1  | -8,12724 | 5,52E-05 |

|           |          |          |
|-----------|----------|----------|
| ALDH2     | -8,13648 | 6,50E-74 |
| MUC13     | -8,15354 | 4,97E-05 |
| HLA-H     | -8,16899 | 1,55E-11 |
| LYPD5     | -8,17355 | 3,18E-06 |
| PTPRD     | -8,19554 | 3,82E-05 |
| HRCT1     | -8,20227 | 3,87E-05 |
| TLR6      | -8,20556 | 3,62E-05 |
| SBSPON    | -8,21177 | 5,34E-05 |
| WNT16     | -8,23852 | 5,06E-05 |
| UGT8      | -8,24737 | 4,94E-05 |
| FGFBP1    | -8,26869 | 2,50E-05 |
| FEZF1-AS1 | -8,27696 | 2,41E-05 |
| MDFIC     | -8,28892 | 1,01E-16 |
| CES4A     | -8,30432 | 2,11E-05 |
| LINC01152 | -8,30545 | 6,47E-05 |
| WIPF3     | -8,31139 | 3,55E-20 |
| CSF2RA    | -8,31714 | 6,24E-05 |
| EBI3      | -8,32174 | 7,48E-05 |
| SOX9      | -8,33228 | 1,25E-80 |
| GPR35     | -8,34304 | 6,31E-31 |
| NEURL3    | -8,34779 | 3,97E-05 |
| NPR1      | -8,35184 | 2,85E-11 |
| CDHR5     | -8,37315 | 0,000113 |
| HOXB8     | -8,37974 | 1,14E-21 |
| P3H3      | -8,38897 | 2,84E-06 |
| C1RL      | -8,41005 | 1,36E-20 |
| LINC00899 | -8,43489 | 1,40E-05 |
| GBP3      | -8,48357 | 4,61E-07 |
| PHLDB2    | -8,49304 | 9,71E-38 |
| TMBIM1    | -8,52309 | 3,13E-69 |
| ICAM4     | -8,52957 | 8,52E-06 |
| TLDC2     | -8,53159 | 6,75E-06 |
| DUSP5P1   | -8,54734 | 7,87E-06 |
| ZNF280A   | -8,54888 | 7,61E-06 |
| CCL26     | -8,57952 | 8,48E-06 |
| ZFP57     | -8,58487 | 1,26E-23 |
| CDH12     | -8,59284 | 5,41E-06 |
| ZC3H12B   | -8,62411 | 4,20E-06 |
| RARRES2   | -8,63341 | 8,19E-06 |
| ADAMTSL2  | -8,63781 | 9,04E-06 |
| ZNF559    | -8,69511 | 5,00E-06 |
| LONRF3    | -8,6963  | 2,35E-13 |
| ZNF470    | -8,73891 | 2,96E-06 |
| ZNF649    | -8,74064 | 2,29E-06 |
| EVX1      | -8,75056 | 9,99E-06 |
| STEAP2    | -8,75167 | 5,01E-06 |
| RRN3P1    | -8,77623 | 1,94E-06 |
| LTB       | -8,78645 | 7,26E-13 |
| VSNL1     | -8,82621 | 5,09E-14 |
| C4BPB     | -8,83303 | 4,78E-06 |



|           |          |          |
|-----------|----------|----------|
| SLC7A7    | -8,83462 | 3,03E-20 |
| CSF2      | -8,842   | 3,30E-06 |
| TLR3      | -8,85649 | 1,25E-06 |
| CST7      | -8,87556 | 1,25E-06 |
| GIPR      | -8,88083 | 1,08E-06 |
| AKT3      | -8,89928 | 1,07E-06 |
| LRRN4     | -8,91101 | 5,58E-06 |
| KLK6      | -8,91989 | 6,99E-25 |
| LOC72997C | -8,97149 | 7,01E-07 |
| TMEM220   | -8,98193 | 1,34E-06 |
| LAMA1     | -9,01195 | 5,34E-07 |
| ADGRG5    | -9,04198 | 4,53E-07 |
| HOXD13    | -9,04472 | 7,45E-07 |
| ZNF175    | -9,06723 | 3,99E-07 |
| SERP2     | -9,06891 | 4,22E-07 |
| TIMP4     | -9,07039 | 7,85E-07 |
| PAX6      | -9,0772  | 3,75E-07 |
| DMRTA2    | -9,10424 | 2,53E-08 |
| CDH17     | -9,12607 | 2,19E-06 |
| SLC6A20   | -9,12668 | 3,13E-07 |
| LOC10192E | -9,13019 | 1,12E-06 |
| C11orf45  | -9,14255 | 2,97E-07 |
| HOXB3     | -9,15027 | 4,18E-22 |
| NOS2      | -9,15848 | 1,93E-08 |
| NRN1      | -9,17241 | 2,78E-07 |
| PRKCQ-AS1 | -9,17257 | 2,35E-07 |
| FGF2      | -9,18857 | 7,64E-29 |
| PSMB8     | -9,19339 | 4,86E-27 |
| C7orf31   | -9,20478 | 2,55E-07 |
| GATA2-AS1 | -9,21726 | 1,85E-08 |
| LRRC34    | -9,22335 | 2,14E-07 |
| TNFSF12   | -9,22502 | 1,69E-07 |
| DLX6      | -9,22845 | 4,83E-07 |
| LINC00941 | -9,28622 | 1,22E-07 |
| SH3GL2    | -9,29798 | 3,22E-08 |
| HOXB-AS3  | -9,32047 | 5,86E-07 |
| ABCB1     | -9,38316 | 2,59E-86 |
| CCL28     | -9,38556 | 7,85E-08 |
| FAM27E3   | -9,40992 | 1,78E-07 |
| CELF2     | -9,42568 | 5,61E-08 |
| DMD       | -9,43736 | 5,36E-08 |
| C1RL-AS1  | -9,44296 | 5,16E-08 |
| ICAM2     | -9,45128 | 5,92E-09 |
| HOTTIP    | -9,49677 | 3,92E-08 |
| CADPS     | -9,51276 | 1,25E-14 |
| TMSB4Y    | -9,52524 | 3,51E-08 |
| TMEM52B   | -9,52644 | 2,84E-07 |
| PRKCQ     | -9,56007 | 4,46E-08 |
| LOC11511C | -9,581   | 4,57E-08 |
| FRG1CP    | -9,62767 | 1,79E-08 |

|           |          |           |
|-----------|----------|-----------|
| MAP1LC3A  | -9,68045 | 1,36E-08  |
| GSDMA     | -9,71269 | 3,89E-07  |
| AGPS      | -9,77338 | 1,50E-54  |
| BCL11A    | -9,81767 | 6,57E-09  |
| CCAT1     | -9,86901 | 9,09E-09  |
| KLK7      | -9,90803 | 2,75E-08  |
| HOXD9     | -9,91462 | 3,64E-09  |
| LINC01224 | -9,93851 | 3,27E-09  |
| PRKY      | -10,0719 | 2,90E-09  |
| TTY15     | -10,0812 | 1,41E-09  |
| ABO       | -10,0842 | 1,47E-09  |
| NUDT16P1  | -10,1288 | 1,35E-09  |
| DPEP1     | -10,1403 | 7,38E-18  |
| RAB38     | -10,156  | 9,52E-10  |
| CA13      | -10,2112 | 6,86E-10  |
| ETS1      | -10,2174 | 2,20E-09  |
| FAM71E1   | -10,2175 | 8,35E-10  |
| HOXA9     | -10,2491 | 5,52E-10  |
| ARHGAP31  | -10,2607 | 9,02E-11  |
| TRIM10    | -10,2821 | 4,76E-10  |
| PLAT      | -10,3271 | 7,50E-10  |
| EREG      | -10,3476 | 1,00E-13  |
| LDHB      | -10,3483 | 0,000573  |
| ARSE      | -10,365  | 2,83E-10  |
| GPRIN2    | -10,4004 | 2,73E-10  |
| MT1A      | -10,4332 | 1,28E-09  |
| GSTP1     | -10,4442 | 6,66E-122 |
| FOXA3     | -10,4469 | 1,96E-10  |
| PDX1      | -10,4553 | 1,84E-10  |
| HRH1      | -10,5017 | 2,88E-10  |
| HMGA2     | -10,523  | 7,97E-11  |
| UTY       | -10,6317 | 6,54E-11  |
| ZNF215    | -10,6922 | 4,44E-11  |
| TNFRSF1B  | -10,694  | 4,31E-11  |
| NT5E      | -10,7104 | 1,73E-10  |
| GJB6      | -10,7497 | 3,86E-11  |
| EPS8L3    | -10,8307 | 3,08E-11  |
| TRIM58    | -10,8347 | 1,11E-10  |
| ZC3HAV1L  | -10,857  | 2,42E-11  |
| HOXB5     | -10,8728 | 1,56E-11  |
| CYB5R2    | -10,893  | 1,67E-11  |
| ZNF280B   | -10,9092 | 1,34E-11  |
| SDHAF3    | -10,989  | 8,76E-12  |
| ZFY       | -11,0521 | 9,53E-12  |
| CCL20     | -11,0895 | 7,84E-05  |
| GDA       | -11,1007 | 2,87E-11  |
| TNFSF15   | -11,1344 | 1,81E-05  |
| SAMD5     | -11,167  | 3,56E-12  |
| RAC2      | -11,1725 | 7,02E-12  |
| KCNJ5     | -11,2668 | 4,84E-11  |

|           |          |          |
|-----------|----------|----------|
| HOXA10-A' | -11,402  | 6,95E-13 |
| AASS      | -11,4903 | 5,85E-13 |
| TNFRSF9   | -11,5652 | 2,73E-13 |
| HOXA10    | -11,6178 | 1,99E-13 |
| TNFRSF10C | -11,6206 | 2,45E-13 |
| TXLNGY    | -11,6929 | 1,25E-13 |
| PRSS3     | -11,7796 | 7,37E-14 |
| ZNF320    | -11,8209 | 5,82E-14 |
| FUT2      | -11,8411 | 7,23E-14 |
| PLAU      | -11,8602 | 1,06E-13 |
| TCEAL8    | -11,8624 | 4,63E-14 |
| CXCL3     | -11,8737 | 1,58E-12 |
| TINAGL1   | -11,8843 | 6,94E-14 |
| GSPT2     | -11,8991 | 3,93E-14 |
| KDM5D     | -11,9224 | 7,64E-14 |
| ZNF518B   | -11,9282 | 3,13E-14 |
| C5orf42   | -11,9633 | 2,63E-14 |
| CYBRD1    | -12,0441 | 2,02E-14 |
| HNF1B     | -12,0528 | 1,64E-14 |
| KIRREL    | -12,0532 | 1,67E-14 |
| EIF1AY    | -12,0881 | 1,41E-14 |
| USP9Y     | -12,0882 | 1,20E-14 |
| SLCO1B3   | -12,1433 | 1,29E-14 |
| WBP5      | -12,2765 | 4,12E-15 |
| GALNT5    | -12,2822 | 1,17E-05 |
| VIL1      | -12,4378 | 2,88E-15 |
| TMEM246   | -12,5519 | 8,80E-16 |
| GNE       | -12,5863 | 1,26E-15 |
| NLRP2     | -12,6137 | 1,02E-15 |
| CXCL1     | -12,6815 | 3,94E-09 |
| SIGMAR1   | -12,7846 | 5,91E-32 |
| C16orf96  | -12,8441 | 1,28E-16 |
| C2CD2     | -12,857  | 1,75E-16 |
| ZCCHC11   | -12,949  | 7,98E-17 |
| IGF2BP3   | -13,1502 | 1,78E-17 |
| CXCL2     | -13,4363 | 4,70E-08 |
| GPX1      | -13,5091 | 3,40E-18 |
| CXCL5     | -13,5715 | 1,25E-18 |
| CNN3      | -13,5781 | 6,12E-19 |
| DDX3Y     | -13,7174 | 1,60E-18 |
| MT1E      | -13,8595 | 3,61E-19 |
| EMC10     | -14,1193 | 5,21E-20 |
| CLDN2     | -14,4213 | 6,32E-21 |
| OLR1      | -15,9408 | 4,61E-25 |
| AFAP1-AS1 | -17,1271 | 1,52E-29 |

HCT116

| Gene     | log2FoldCh | FDR       |
|----------|------------|-----------|
| AKAP12   | -8,45032   | 7,69E-144 |
| TPM2     | -9,35571   | 5,80E-124 |
| GSTP1    | -10,5241   | 8,57E-113 |
| RHOBTB1  | 7,331974   | 2,17E-110 |
| ANXA1    | -6,75054   | 3,35E-110 |
| SOX9     | -8,57732   | 7,28E-99  |
| SPRY4    | -8,17914   | 3,72E-88  |
| SERPINE2 | -6,38873   | 4,65E-74  |
| EPB41L2  | -5,46721   | 8,57E-70  |
| PALD1    | -6,18134   | 1,15E-68  |
| FOXA1    | 5,410203   | 3,25E-67  |
| HOMER2   | 7,621033   | 1,07E-66  |
| RBP1     | -9,25166   | 2,88E-66  |
| CTS2     | -8,88751   | 4,24E-64  |
| COL12A1  | -8,26702   | 8,61E-63  |
| ETV5     | -8,04297   | 3,99E-61  |
| STC1     | 6,744312   | 1,43E-60  |
| BIN1     | -6,70767   | 4,02E-60  |
| ACSL5    | -9,20434   | 5,76E-60  |
| TMBIM1   | -8,33587   | 3,00E-59  |
| EGFR     | -5,66357   | 1,56E-58  |
| TENM3    | 7,060486   | 1,96E-58  |
| MAGEB2   | -9,56922   | 2,98E-58  |
| ADAM19   | -6,30449   | 1,37E-57  |
| VCAN     | -9,05153   | 1,60E-57  |
| PRSS23   | 6,220383   | 7,12E-57  |
| ZNF703   | 4,814344   | 5,70E-56  |
| PHLDB2   | -10,4676   | 4,85E-55  |
| MEX3A    | 4,343738   | 5,35E-54  |
| NPW      | -4,9696    | 2,25E-53  |
| FLRT3    | 6,528264   | 2,60E-53  |
| OSBPL3   | -8,41833   | 2,44E-51  |
| ANO1     | -10,3897   | 3,99E-51  |
| FAM101B  | -4,93268   | 4,93E-50  |
| IGF2BP2  | -4,58798   | 5,19E-50  |
| PRMT6    | 4,246137   | 6,08E-50  |
| AGPS     | -9,61246   | 6,21E-50  |
| MID1     | -6,88042   | 9,15E-50  |
| PIK3R3   | 6,533346   | 6,09E-49  |
| SLC38A5  | -9,098     | 1,99E-48  |
| YBX2     | 7,825385   | 4,99E-48  |
| CD109    | -5,70311   | 4,82E-47  |
| CD24     | 5,901124   | 1,71E-46  |
| CMTM7    | -5,36566   | 2,22E-46  |
| RIN1     | -6,09716   | 2,33E-46  |
| MYEOV    | -5,90676   | 6,06E-46  |
| STAP2    | 7,046507   | 2,29E-45  |
| BMP7     | 3,831037   | 1,07E-44  |

|          |          |          |
|----------|----------|----------|
| FRMD5    | -5,08709 | 3,49E-44 |
| LYN      | -6,11729 | 5,69E-44 |
| ITGA5    | -5,3316  | 8,49E-44 |
| ARHGAP29 | -4,90908 | 1,64E-43 |
| SULF2    | 4,924137 | 1,68E-43 |
| FAM213A  | 5,481121 | 4,44E-43 |
| JAG1     | -5,02959 | 6,61E-43 |
| CRIP1    | -5,91774 | 1,18E-42 |
| EPAS1    | -6,84569 | 1,55E-42 |
| BAMBI    | 4,043334 | 3,76E-42 |
| TNFRSF19 | 5,473121 | 4,71E-42 |
| MSX1     | -5,20373 | 5,84E-42 |
| SLC9A2   | 5,374113 | 9,99E-42 |
| ALDH2    | -7,36833 | 2,01E-41 |
| UNC13A   | -6,58406 | 1,92E-40 |
| TOR4A    | -5,11299 | 7,05E-40 |
| FBXO2    | -5,76396 | 2,07E-39 |
| PDP1     | -4,86571 | 3,56E-39 |
| EMP3     | -7,70822 | 8,15E-39 |
| SERPINB9 | -5,60564 | 9,30E-39 |
| GATA3    | 5,742156 | 1,49E-38 |
| SYTL3    | -5,68415 | 2,22E-38 |
| BCAS3    | 4,68029  | 2,56E-38 |
| KLK6     | -11,4496 | 4,87E-38 |
| ASPH     | -4,40935 | 1,10E-37 |
| PSMD6    | 3,616195 | 3,79E-37 |
| UCP2     | 4,821463 | 9,50E-37 |
| CKB      | -3,86434 | 1,09E-36 |
| NCOA3    | 3,78466  | 1,29E-36 |
| PODXL2   | 4,333654 | 1,39E-36 |
| TUSC3    | 6,17928  | 9,53E-36 |
| ADORA2B  | -5,23019 | 1,13E-35 |
| NDRG1    | -6,12467 | 2,84E-35 |
| TFAP2C   | 4,486281 | 9,05E-35 |
| MTAP     | -6,5787  | 1,01E-34 |
| TACSTD2  | 6,268508 | 1,31E-34 |
| MCC      | -4,30489 | 1,69E-34 |
| HAS3     | -5,53911 | 3,35E-34 |
| SPRED1   | -5,34821 | 5,66E-34 |
| AKR1B1   | -8,7481  | 5,81E-34 |
| EPHA2    | -5,43957 | 9,43E-34 |
| PAK6     | -5,95892 | 9,76E-34 |
| CDKN2A   | -7,7481  | 1,99E-33 |
| RUNX3    | -10,0062 | 3,46E-33 |
| ADM      | -7,65462 | 3,58E-33 |
| ZDHHC2   | -6,24466 | 6,45E-33 |
| CAV2     | -4,54411 | 7,63E-33 |
| CDC42EP3 | -4,2604  | 1,42E-32 |
| PROM2    | 6,191901 | 2,08E-32 |
| CLDND1   | -3,53515 | 2,43E-32 |

|           |          |          |
|-----------|----------|----------|
| ZBTB20    | -7,52767 | 5,32E-32 |
| GNAI1     | -5,68202 | 1,18E-31 |
| TRIM47    | -4,29893 | 1,30E-31 |
| FOSL1     | -6,65976 | 1,70E-31 |
| F3        | -5,33092 | 2,22E-31 |
| DPYSL3    | -4,94325 | 6,53E-31 |
| DCBLD2    | -4,48482 | 1,06E-30 |
| ANXA3     | -4,68788 | 1,24E-30 |
| ZNF217    | 3,508752 | 2,54E-30 |
| BRIP1     | 3,341347 | 2,74E-30 |
| ITGA6     | -3,73236 | 2,86E-30 |
| SELM      | -4,05125 | 3,94E-30 |
| M1AP      | -7,66513 | 5,14E-30 |
| ACAA2     | 3,495835 | 8,19E-30 |
| GJC1      | -9,54859 | 1,23E-29 |
| IRX5      | 5,037391 | 1,31E-29 |
| SH2B3     | -3,7852  | 1,70E-29 |
| WIPF3     | -9,50611 | 3,64E-29 |
| NXN       | -3,35205 | 4,22E-29 |
| IGSF9     | 3,729142 | 5,25E-29 |
| NOTCH3    | 3,436623 | 5,97E-29 |
| IGFBP5    | 7,008357 | 6,75E-29 |
| LIX1L     | -4,80686 | 9,19E-29 |
| SIGMAR1   | -12,2412 | 1,70E-28 |
| DMKN      | -3,34494 | 2,49E-28 |
| CA2       | -6,16229 | 2,66E-28 |
| GREB1     | 3,683955 | 2,69E-28 |
| CAV1      | -5,09871 | 3,47E-28 |
| SH3PXD2A  | -4,75922 | 5,47E-28 |
| SSFA2     | -4,16056 | 5,47E-28 |
| DCLK1     | 5,201957 | 6,13E-28 |
| LINC01234 | -7,1141  | 7,43E-28 |
| MUC1      | 6,63167  | 7,45E-28 |
| GULP1     | -4,37101 | 7,66E-28 |
| SRPX      | -5,35103 | 7,66E-28 |
| DNMBP     | -3,74975 | 8,99E-28 |
| LCP1      | 6,574197 | 9,02E-28 |
| TRIM24    | 3,243025 | 9,46E-28 |
| RLTPR     | -3,82787 | 9,68E-28 |
| KCNQ2     | -6,04813 | 9,89E-28 |
| CAPN2     | -5,34617 | 1,13E-27 |
| APPBP2    | 2,972044 | 1,13E-27 |
| CD44      | -3,29639 | 1,32E-27 |
| LHX4      | 4,882162 | 1,37E-27 |
| SIPA1     | -3,8601  | 1,67E-27 |
| ROR2      | -7,35609 | 2,10E-27 |
| APOBEC3C  | -8,27721 | 5,23E-27 |
| ZNF264    | -4,48603 | 5,25E-27 |
| RASEF     | 6,676843 | 6,68E-27 |
| SPATC1L   | 5,778134 | 7,44E-27 |

|         |          |          |
|---------|----------|----------|
| FAM50B  | 6,034679 | 7,44E-27 |
| BCL11B  | 4,528967 | 7,85E-27 |
| SPDEF   | 10,11223 | 1,69E-26 |
| SEMA3C  | 3,089919 | 1,91E-26 |
| CUEDC1  | -3,40695 | 2,49E-26 |
| ZC3H12C | -5,57831 | 2,52E-26 |
| C9orf64 | 8,309194 | 6,13E-26 |
| HTR7    | -6,25137 | 6,92E-26 |
| FAT1    | -3,74159 | 1,01E-25 |
| PFDN4   | 3,240912 | 1,40E-25 |
| APCDD1  | 16,04617 | 1,44E-25 |
| RAB34   | 8,292254 | 1,53E-25 |
| MEX3B   | 3,942088 | 1,62E-25 |
| CLIP4   | -8,4354  | 2,65E-25 |
| PHF14   | 3,652511 | 2,73E-25 |
| RBBP8NL | 6,590617 | 3,06E-25 |
| RTN4RL2 | -5,34788 | 3,18E-25 |
| NEB     | 6,694938 | 3,31E-25 |
| TNFAIP2 | -6,12292 | 3,51E-25 |
| AXL     | -9,80586 | 4,23E-25 |
| FHL2    | -6,28147 | 4,47E-25 |
| FGF9    | -8,33075 | 5,48E-25 |
| HOXC10  | 3,740864 | 9,04E-25 |
| NAGS    | -6,16814 | 9,72E-25 |
| TFF1    | 11,92    | 9,72E-25 |
| MAPRE2  | -3,92627 | 1,00E-24 |
| DSE     | -3,87408 | 2,44E-24 |
| ACSS3   | 11,35095 | 3,06E-24 |
| FRMD4A  | 6,238785 | 3,37E-24 |
| IGFBP4  | 8,291469 | 3,40E-24 |
| ECE1    | -3,317   | 4,10E-24 |
| SEPT10  | -4,83452 | 4,82E-24 |
| GLUL    | 2,64768  | 6,94E-24 |
| HSD3B7  | 3,927364 | 7,12E-24 |
| PARM1   | -4,97611 | 8,53E-24 |
| DHRS3   | -4,21217 | 1,57E-23 |
| ZNF595  | 4,431709 | 2,01E-23 |
| TIAM1   | -3,81902 | 2,08E-23 |
| TNS4    | -5,3542  | 2,15E-23 |
| HUNK    | 7,685096 | 2,93E-23 |
| TUBA1A  | 2,942995 | 3,26E-23 |
| ELK3    | -4,09242 | 3,30E-23 |
| SLC1A2  | 7,876029 | 4,46E-23 |
| LAMC2   | -5,75916 | 5,84E-23 |
| UBASH3B | -4,5867  | 7,76E-23 |
| F2RL1   | -4,0449  | 8,06E-23 |
| FABP5   | -2,71787 | 8,06E-23 |
| CPOX    | -4,8823  | 8,58E-23 |
| ESR1    | 10,98328 | 8,64E-23 |
| P3H3    | -8,06862 | 1,05E-22 |

|          |          |          |
|----------|----------|----------|
| POF1B    | 7,50362  | 1,13E-22 |
| TRPS1    | 15,07716 | 1,20E-22 |
| ANKRD33B | -6,87811 | 1,51E-22 |
| PMP22    | -5,2859  | 1,75E-22 |
| SOCS6    | -3,09343 | 1,75E-22 |
| AP1S3    | -3,59409 | 1,88E-22 |
| NANOS1   | 4,492214 | 2,57E-22 |
| HOXB8    | -9,05429 | 2,89E-22 |
| RTBDN    | -7,0152  | 3,09E-22 |
| KYNU     | 8,170548 | 3,12E-22 |
| TMEM98   | -5,00143 | 3,40E-22 |
| ABCA3    | 4,046015 | 3,45E-22 |
| SLC17A9  | -5,3538  | 3,45E-22 |
| FREM2    | 14,91066 | 3,60E-22 |
| COL6A1   | -2,78864 | 3,60E-22 |
| SLC25A13 | 3,248782 | 3,75E-22 |
| ZMYM2    | 2,884059 | 4,14E-22 |
| EVA1C    | -4,59498 | 4,32E-22 |
| COL6A2   | -3,83169 | 5,09E-22 |
| P2RY2    | 3,745829 | 5,09E-22 |
| ZNF254   | 3,760248 | 5,27E-22 |
| TBC1D9   | 3,201633 | 5,27E-22 |
| B4GALT5  | -3,09881 | 6,92E-22 |
| S100A4   | -4,05627 | 7,22E-22 |
| IGFBP6   | -5,69255 | 7,73E-22 |
| FBLN1    | -7,73845 | 8,66E-22 |
| BCAR3    | -3,54884 | 9,87E-22 |
| CLDN3    | 3,728433 | 1,06E-21 |
| EHD2     | -2,95619 | 1,07E-21 |
| NRCAM    | 6,497223 | 1,08E-21 |
| DYNC1I1  | 9,098525 | 1,14E-21 |
| SNAI1    | -4,07438 | 1,37E-21 |
| CYP1B1   | 5,478553 | 1,46E-21 |
| FLNC     | -14,6957 | 1,86E-21 |
| GOLM1    | -2,76429 | 1,87E-21 |
| MXRA7    | -3,50541 | 1,93E-21 |
| AK7      | 4,346185 | 2,41E-21 |
| TEAD2    | 3,349325 | 2,61E-21 |
| RIMKLB   | 6,37893  | 3,24E-21 |
| CIART    | 8,242678 | 3,28E-21 |
| DLX3     | 9,325012 | 4,07E-21 |
| GPAT2    | -6,88297 | 4,07E-21 |
| IGF1R    | 3,351238 | 4,26E-21 |
| GPX1     | -14,5526 | 4,47E-21 |
| PVRL4    | 4,594132 | 4,62E-21 |
| ICAM5    | -4,84813 | 4,97E-21 |
| BDNF     | -5,77926 | 5,15E-21 |
| ETV4     | -6,17122 | 5,47E-21 |
| GLI2     | -7,89506 | 5,62E-21 |
| LEF1     | 14,6186  | 6,30E-21 |



|           |          |          |
|-----------|----------|----------|
| PCSK1N    | 8,174622 | 6,44E-21 |
| PRSS12    | -9,14011 | 7,68E-21 |
| ZFH3      | 2,851719 | 8,55E-21 |
| QPR1      | 8,483407 | 9,64E-21 |
| IDH2      | 3,267473 | 1,15E-20 |
| COBLL1    | 3,628121 | 1,26E-20 |
| CILP2     | -4,19472 | 1,37E-20 |
| SUMO3     | 2,88134  | 1,57E-20 |
| MT1E      | -14,508  | 1,95E-20 |
| SPPL2A    | 2,769484 | 1,98E-20 |
| GJB3      | -5,86145 | 2,19E-20 |
| KLK8      | -8,43645 | 2,19E-20 |
| GPC1      | -3,0429  | 2,29E-20 |
| TGFA      | -3,89576 | 2,40E-20 |
| MAOB      | -4,62463 | 2,40E-20 |
| SMIM22    | 7,192785 | 3,60E-20 |
| COTL1     | -2,75869 | 3,63E-20 |
| IRX3      | 5,668276 | 3,86E-20 |
| LDOC1     | 14,28976 | 4,02E-20 |
| EHF       | -3,75755 | 4,31E-20 |
| GRHL3     | 5,886222 | 4,50E-20 |
| STON2     | 3,350853 | 4,69E-20 |
| TSPYL5    | 14,16023 | 4,86E-20 |
| FOXC1     | -2,81584 | 4,97E-20 |
| TRIP10    | -3,40648 | 7,18E-20 |
| KCNH3     | -3,6523  | 7,24E-20 |
| GTSF1     | -14,1016 | 7,62E-20 |
| MBP       | -3,79233 | 8,03E-20 |
| EMC10     | -14,0465 | 1,20E-19 |
| CRIP2     | 3,145782 | 1,81E-19 |
| PREX1     | 2,92929  | 1,82E-19 |
| LIN7A     | 4,133451 | 1,94E-19 |
| CGREF1    | 3,509714 | 2,11E-19 |
| SCN5A     | -4,41451 | 2,14E-19 |
| KIAA1324  | 5,382971 | 2,14E-19 |
| MEPCE     | 2,482219 | 2,58E-19 |
| SLC16A3   | -4,37455 | 2,93E-19 |
| CHST6     | -6,31134 | 3,08E-19 |
| FBP1      | 13,27354 | 3,38E-19 |
| SIRPA     | -3,47082 | 3,88E-19 |
| AMPD3     | -4,48464 | 4,18E-19 |
| LARGE     | 4,796048 | 4,60E-19 |
| C15orf59  | 5,189806 | 4,91E-19 |
| C14orf159 | -4,06448 | 4,98E-19 |
| ARAP3     | -4,56496 | 5,85E-19 |
| ZNF467    | 3,240069 | 6,98E-19 |
| ZNF518B   | -13,7419 | 9,48E-19 |
| C3orf14   | 13,76133 | 9,85E-19 |
| MAFB      | 5,233475 | 1,01E-18 |
| ARHGAP23  | -4,49515 | 1,20E-18 |

|           |          |          |
|-----------|----------|----------|
| TMPRSS13  | 5,777784 | 1,29E-18 |
| SOX4      | 3,200378 | 1,32E-18 |
| USP32     | 3,509597 | 1,33E-18 |
| SMARCA1   | -3,9803  | 1,43E-18 |
| OR51B5    | -13,6653 | 1,50E-18 |
| POPDC3    | -6,14227 | 1,60E-18 |
| STAT5B    | 3,413752 | 1,63E-18 |
| KIFC3     | -5,30279 | 1,69E-18 |
| HSPB8     | 4,135698 | 1,90E-18 |
| WLS       | -3,48852 | 1,98E-18 |
| NT5E      | -13,7789 | 2,30E-18 |
| PRKCA     | -3,91116 | 2,34E-18 |
| RAC2      | -13,5908 | 2,45E-18 |
| MRVI1     | -7,88213 | 3,06E-18 |
| PPP1R14C  | -8,25426 | 3,26E-18 |
| INHBB     | 4,700124 | 3,30E-18 |
| DDN       | -4,71762 | 3,36E-18 |
| PLEK2     | -3,46651 | 3,64E-18 |
| RDH16     | 5,662736 | 3,67E-18 |
| TINAGL1   | -13,5917 | 4,30E-18 |
| LIF       | -4,78528 | 4,63E-18 |
| EFEMP1    | 13,46721 | 4,80E-18 |
| FXYD5     | -3,15823 | 5,21E-18 |
| IER3      | -4,70574 | 5,21E-18 |
| ST6GALNA4 | -3,83227 | 6,41E-18 |
| CRYBG3    | -4,6326  | 6,84E-18 |
| FAM46A    | -3,77148 | 7,03E-18 |
| CXorf57   | -4,39055 | 8,01E-18 |
| GRIN2D    | -3,6416  | 8,38E-18 |
| CLIP2     | -2,69686 | 8,79E-18 |
| PDE9A     | -3,44449 | 1,02E-17 |
| MST1R     | -4,87635 | 1,16E-17 |
| CIB2      | -4,78597 | 1,31E-17 |
| SLC27A3   | 3,195433 | 1,32E-17 |
| MATK      | 13,28504 | 1,48E-17 |
| HLA-A     | -3,32619 | 1,58E-17 |
| PRPS2     | -2,7138  | 1,64E-17 |
| TNFAIP8L3 | 5,278145 | 1,74E-17 |
| TGM2      | -5,53891 | 1,74E-17 |
| HBE1      | -13,3432 | 1,85E-17 |
| ACSL4     | -2,82367 | 1,91E-17 |
| IGF2BP3   | -13,2321 | 2,08E-17 |
| DDAH2     | 2,922835 | 2,28E-17 |
| TUBD1     | 3,132613 | 2,29E-17 |
| CAMK2D    | -3,50962 | 2,62E-17 |
| SLC6A17   | -9,98437 | 3,02E-17 |
| SPTBN2    | 2,941214 | 3,67E-17 |
| TRIM37    | 2,596188 | 3,86E-17 |
| ITGA3     | -3,32722 | 4,18E-17 |
| CNN3      | -12,9824 | 4,59E-17 |

|           |          |          |
|-----------|----------|----------|
| SYTL2     | 3,153903 | 5,98E-17 |
| PROCR     | -5,39794 | 7,16E-17 |
| KLK7      | -13,2395 | 7,90E-17 |
| NPR3      | 4,820671 | 7,90E-17 |
| STARD10   | 3,472984 | 8,07E-17 |
| TMEM30B   | 13,02118 | 8,31E-17 |
| PLAU      | -13,4944 | 9,57E-17 |
| HOXB13    | -5,69096 | 9,88E-17 |
| NCOR1     | 2,344956 | 1,10E-16 |
| DYRK1B    | 3,400556 | 1,14E-16 |
| C1RL      | -7,8612  | 1,21E-16 |
| FRMD6     | 2,905162 | 1,31E-16 |
| GFRA1     | 13,08007 | 1,32E-16 |
| MSLN      | -5,96806 | 1,38E-16 |
| PLK3      | -3,55629 | 1,39E-16 |
| TUBB4A    | -3,51218 | 1,58E-16 |
| TNNI3     | -4,16007 | 1,59E-16 |
| HLA-B     | -4,31868 | 1,59E-16 |
| FAM13A    | -4,15254 | 1,68E-16 |
| KRBA1     | 7,23295  | 1,70E-16 |
| CARD10    | -3,1236  | 1,73E-16 |
| LRRC8C    | -3,77083 | 1,96E-16 |
| PROM1     | -12,8746 | 1,96E-16 |
| C10orf54  | -6,5773  | 2,06E-16 |
| CBR1      | 12,91963 | 2,06E-16 |
| SSH1      | -2,5055  | 2,11E-16 |
| GSTM3     | 13,22374 | 2,12E-16 |
| ZNF260    | 12,85028 | 2,25E-16 |
| ELFN1-AS1 | -6,07198 | 2,44E-16 |
| ABHD10    | -2,62265 | 3,78E-16 |
| ZCCHC11   | -12,7687 | 3,79E-16 |
| PRSS3     | -12,835  | 3,94E-16 |
| FAM171A1  | -3,18801 | 4,06E-16 |
| ARMC4     | -5,64916 | 4,11E-16 |
| CACNA1D   | 4,483648 | 4,15E-16 |
| EVL       | 2,785415 | 4,24E-16 |
| TRIM7     | -4,32342 | 4,30E-16 |
| SMAP1     | 3,248835 | 4,51E-16 |
| PRR36     | 3,060541 | 4,54E-16 |
| ACKR3     | 12,70119 | 4,82E-16 |
| CADM1     | 9,344468 | 4,88E-16 |
| TMEM200/  | -12,846  | 4,96E-16 |
| GEM       | -6,26572 | 5,01E-16 |
| C14orf169 | 3,279582 | 5,36E-16 |
| KRT8      | 3,118281 | 5,40E-16 |
| PRKAR1B   | 2,444534 | 5,62E-16 |
| SEMA6B    | -2,53476 | 6,18E-16 |
| SELENBP1  | 12,69385 | 6,26E-16 |
| VWA5B2    | -6,33753 | 6,61E-16 |
| DSC3      | -9,41681 | 7,20E-16 |

|           |          |          |
|-----------|----------|----------|
| CYP26B1   | -5,45396 | 7,35E-16 |
| MICB      | -3,71402 | 7,53E-16 |
| HSPA12A   | -3,35999 | 7,81E-16 |
| TYMP      | -4,11505 | 9,11E-16 |
| PKIB      | 3,610183 | 9,16E-16 |
| TNFRSF10C | -13,1344 | 9,16E-16 |
| PLA2G16   | -4,02256 | 9,18E-16 |
| ELFN2     | -4,51182 | 9,28E-16 |
| FSTL1     | -5,29289 | 9,60E-16 |
| NLRP2     | -12,954  | 1,02E-15 |
| CREB3L4   | 3,698574 | 1,09E-15 |
| PTPRO     | 7,045422 | 1,09E-15 |
| MYL9      | -12,6756 | 1,19E-15 |
| GRIP1     | 6,701999 | 1,24E-15 |
| TMEM246   | -12,5746 | 1,39E-15 |
| PLAUR     | -4,83844 | 1,43E-15 |
| FAM127C   | 12,52595 | 1,44E-15 |
| HMGA2     | -12,3969 | 1,46E-15 |
| THOC7     | 2,300273 | 1,55E-15 |
| NFIB      | 2,656282 | 1,62E-15 |
| HDGFRP3   | 12,67636 | 1,70E-15 |
| RNF217    | -8,12313 | 1,82E-15 |
| TIMP2     | -2,55626 | 1,90E-15 |
| CHD6      | 2,530226 | 2,00E-15 |
| DHTKD1    | 2,492196 | 2,03E-15 |
| KCNJ8     | 12,47773 | 2,05E-15 |
| PCDHA6    | 12,45601 | 2,16E-15 |
| ZNF43     | 12,44169 | 2,18E-15 |
| LPAR3     | -12,4732 | 2,22E-15 |
| NHP2      | 2,130014 | 2,22E-15 |
| PRRX2     | -5,40287 | 2,27E-15 |
| EMP1      | -9,43869 | 2,41E-15 |
| ZNF469    | -4,88129 | 2,44E-15 |
| GPAT3     | -3,96932 | 2,63E-15 |
| VAV3      | 12,42828 | 2,64E-15 |
| ADAMTS14  | -6,96468 | 2,64E-15 |
| XXYLT1    | 2,764025 | 2,93E-15 |
| ERV3-1    | 3,507525 | 3,14E-15 |
| TCEAL8    | -12,4197 | 3,27E-15 |
| KIAA1462  | -4,18793 | 3,43E-15 |
| ADGRB1    | 3,443055 | 3,47E-15 |
| CPNE7     | -2,57274 | 3,49E-15 |
| FAM3C     | -2,49585 | 3,62E-15 |
| SNPH      | -8,1019  | 3,80E-15 |
| RAB3B     | -3,55996 | 4,06E-15 |
| MYEF2     | 12,48624 | 4,28E-15 |
| BRSK2     | -3,55084 | 4,45E-15 |
| PRLR      | 12,34846 | 4,72E-15 |
| NNT       | 12,32883 | 5,36E-15 |
| ISOC2     | 2,510002 | 5,57E-15 |

|           |          |          |
|-----------|----------|----------|
| PALLD     | -2,91373 | 5,87E-15 |
| ACO1      | -3,17517 | 6,23E-15 |
| SMO       | -8,21074 | 6,33E-15 |
| GFY       | -7,89173 | 6,35E-15 |
| WBP5      | -12,2961 | 6,45E-15 |
| SP5       | 3,074371 | 7,63E-15 |
| MSH3      | 3,196722 | 7,77E-15 |
| IRX2      | 12,23696 | 8,29E-15 |
| FAM63A    | 4,384289 | 8,48E-15 |
| KRT18     | 3,34224  | 8,55E-15 |
| PRR15L    | 12,31181 | 1,01E-14 |
| POLR3G    | -2,75556 | 1,06E-14 |
| CPA4      | -8,69509 | 1,25E-14 |
| RBP7      | -12,1827 | 1,30E-14 |
| KIRREL    | -12,3786 | 1,32E-14 |
| INPP1     | -5,94156 | 1,62E-14 |
| MCTP2     | -6,30175 | 1,68E-14 |
| TRAPPC6A  | 3,265039 | 1,76E-14 |
| HHEX      | -3,85866 | 1,79E-14 |
| PVRL3     | -12,1741 | 1,89E-14 |
| NUCKS1    | 2,120856 | 1,98E-14 |
| CSDE1     | 2,445982 | 2,05E-14 |
| KIF1A     | 12,0737  | 2,14E-14 |
| TRNP1     | -3,31737 | 2,16E-14 |
| FHL1      | -4,02923 | 2,20E-14 |
| MUC3A     | -3,64263 | 2,35E-14 |
| FERMT1    | -2,70224 | 2,46E-14 |
| TRIM72    | -12,1187 | 2,50E-14 |
| ULBP3     | -4,59439 | 2,53E-14 |
| ERBB3     | 2,369775 | 3,09E-14 |
| MBNL3     | 2,648909 | 3,16E-14 |
| MDFI      | -12,1579 | 3,32E-14 |
| C2CD2     | -12,2496 | 3,33E-14 |
| LRP2      | 7,50025  | 3,53E-14 |
| GALNT18   | -2,65325 | 3,59E-14 |
| PIK3AP1   | -5,1199  | 3,60E-14 |
| TMEM200E  | -6,68841 | 3,68E-14 |
| TTYH2     | -2,91889 | 3,77E-14 |
| LRAT      | -4,91374 | 3,98E-14 |
| RMND5B    | 2,285385 | 4,07E-14 |
| HOXA10-AS | -12,0262 | 4,21E-14 |
| MSRB2     | 2,969371 | 4,25E-14 |
| WDR83OS   | 2,227787 | 4,30E-14 |
| DCDC2     | 7,239014 | 4,32E-14 |
| ALG1L     | 6,186678 | 4,33E-14 |
| CBS       | 11,92037 | 4,83E-14 |
| HIPK1     | 2,201096 | 4,84E-14 |
| NRSN2     | 5,364383 | 5,21E-14 |
| SERTAD4   | 9,044891 | 5,43E-14 |
| LRRK1     | -3,67665 | 5,47E-14 |

|           |          |          |
|-----------|----------|----------|
| SLC45A1   | -8,06192 | 5,54E-14 |
| SPG20     | 11,8994  | 5,56E-14 |
| ERRFI1    | -5,19042 | 6,02E-14 |
| ZNF737    | 12,1459  | 6,16E-14 |
| PHLDA2    | -4,10805 | 6,26E-14 |
| S100A6    | -2,83843 | 6,29E-14 |
| ADGRF1    | -12,3252 | 6,29E-14 |
| SOWAHC    | -3,71083 | 6,36E-14 |
| TP53TG1   | 11,94973 | 6,41E-14 |
| DOC2B     | -8,907   | 7,09E-14 |
| HOXB6     | -5,53873 | 7,09E-14 |
| DOCK3     | -5,41609 | 7,15E-14 |
| SNX10     | -3,17045 | 7,49E-14 |
| FAM3B     | 7,665279 | 7,57E-14 |
| TBX2      | 8,840533 | 8,02E-14 |
| EMILIN2   | -4,64078 | 8,30E-14 |
| ALDH3B2   | 12,13349 | 8,72E-14 |
| ZBED2     | -12,0249 | 9,03E-14 |
| BCAS2     | 2,28844  | 9,11E-14 |
| RTTN      | -3,32017 | 9,75E-14 |
| KLHL29    | -3,80573 | 9,78E-14 |
| PROS1     | -4,96408 | 1,01E-13 |
| FAM135A   | -3,13316 | 1,01E-13 |
| ZNF93     | 11,78333 | 1,11E-13 |
| BST2      | 6,310001 | 1,12E-13 |
| CNIH2     | 4,979673 | 1,21E-13 |
| PCDHA11   | 11,83027 | 1,21E-13 |
| PCDHB2    | 11,81061 | 1,23E-13 |
| CKMT1B    | 2,805494 | 1,24E-13 |
| KLK10     | -7,66732 | 1,24E-13 |
| AUTS2     | 11,75618 | 1,24E-13 |
| EFNB3     | 5,627112 | 1,27E-13 |
| MUM1L1    | -5,11802 | 1,33E-13 |
| RPL39L    | 11,73601 | 1,37E-13 |
| HS3ST1    | -11,6202 | 1,39E-13 |
| GDA       | -11,8855 | 1,41E-13 |
| PCDHB13   | 7,618172 | 1,44E-13 |
| CCDC170   | 9,226247 | 1,46E-13 |
| PSMG3-AS1 | 5,032644 | 1,49E-13 |
| HAPLN3    | -6,78316 | 1,55E-13 |
| ZBTB42    | 2,723898 | 1,56E-13 |
| LINC01315 | -5,17136 | 1,56E-13 |
| TARS2     | 2,609954 | 1,57E-13 |
| FOXP1     | 3,161842 | 1,61E-13 |
| RUNX2     | 2,895352 | 1,64E-13 |
| ATXN7L3B  | 2,081571 | 1,66E-13 |
| TRIB1     | -2,34417 | 1,67E-13 |
| DLX5      | 11,72409 | 1,67E-13 |
| DUOX1     | -7,77472 | 1,85E-13 |
| ZFHX4     | -11,9107 | 1,85E-13 |

|           |          |          |
|-----------|----------|----------|
| LPAR1     | -11,7622 | 1,85E-13 |
| MALT1     | -2,46409 | 1,87E-13 |
| ERICH5    | -7,21705 | 1,92E-13 |
| HOXA10    | -11,8476 | 1,94E-13 |
| IMPA1     | -2,53365 | 1,98E-13 |
| PCSK5     | -7,22714 | 2,06E-13 |
| PCDHGC3   | 8,727161 | 2,10E-13 |
| NREP      | 3,299718 | 2,15E-13 |
| C16orf45  | -3,81084 | 2,18E-13 |
| ZNF140    | 11,67392 | 2,26E-13 |
| TMEM59L   | -5,18766 | 2,34E-13 |
| IL4R      | -3,29361 | 2,44E-13 |
| PCDHB3    | 11,68853 | 2,44E-13 |
| ARL4D     | -3,24151 | 2,45E-13 |
| NAPRT     | -3,01841 | 2,50E-13 |
| SORT1     | 2,529101 | 2,50E-13 |
| OLFM1     | 3,487212 | 2,51E-13 |
| ULBP2     | -5,49527 | 2,53E-13 |
| S1PR3     | 11,44113 | 3,06E-13 |
| SOX8      | -7,81824 | 3,18E-13 |
| AP4B1-AS1 | 7,567884 | 3,19E-13 |
| KLC3      | -2,92264 | 3,38E-13 |
| VSNL1     | -9,67338 | 3,44E-13 |
| TCEA3     | 2,704578 | 3,51E-13 |
| HEATR6    | 2,259131 | 3,58E-13 |
| ADCY1     | 11,60285 | 3,61E-13 |
| SDHAF3    | -11,7736 | 3,77E-13 |
| C9orf152  | 11,69427 | 3,91E-13 |
| ETS1      | -12,1133 | 3,96E-13 |
| PMAIP1    | -3,3779  | 4,08E-13 |
| ZNF280B   | -11,6047 | 4,38E-13 |
| CORO2A    | -3,27404 | 4,43E-13 |
| DUSP4     | -4,98526 | 4,44E-13 |
| ZFP69B    | 5,898499 | 4,49E-13 |
| PYCARD    | 11,64076 | 4,50E-13 |
| SPEG      | -3,40417 | 4,55E-13 |
| LTBP1     | 2,775054 | 4,61E-13 |
| DGKA      | -4,19874 | 4,70E-13 |
| RPS4Y1    | -11,5708 | 4,79E-13 |
| KREMEN2   | 2,609274 | 4,80E-13 |
| NFKB2     | -3,33954 | 4,99E-13 |
| ARHGAP4   | -2,93435 | 5,00E-13 |
| PLXDC2    | 11,54161 | 5,03E-13 |
| MCM3AP-/- | 3,888322 | 5,54E-13 |
| PCDHB16   | 11,60451 | 5,59E-13 |
| CALD1     | -3,94791 | 5,66E-13 |
| ADAMTS19  | 10,88311 | 5,74E-13 |
| HENMT1    | 11,47973 | 5,83E-13 |
| PGM2L1    | 2,677797 | 6,02E-13 |
| TMEM25    | -11,5337 | 6,05E-13 |

|          |          |          |
|----------|----------|----------|
| NAALADL2 | 5,764304 | 6,29E-13 |
| CD40     | -11,6323 | 6,38E-13 |
| YOD1     | -5,00543 | 7,17E-13 |
| BIRC3    | -5,68434 | 7,39E-13 |
| STK39    | -2,92103 | 8,20E-13 |
| CAPG     | -2,27119 | 8,24E-13 |
| ECHS1    | 2,128151 | 8,45E-13 |
| ZNF320   | -11,4746 | 8,45E-13 |
| RAB38    | -11,6169 | 8,53E-13 |
| TRIML2   | -5,67261 | 8,53E-13 |
| TMEM45A  | -4,89253 | 8,55E-13 |
| ZNF608   | 3,385393 | 9,06E-13 |
| ZNF829   | 11,48325 | 9,10E-13 |
| IL18     | -5,14539 | 9,35E-13 |
| TMEM178f | 6,981072 | 9,44E-13 |
| C1orf56  | 5,448495 | 9,74E-13 |
| ARTN     | -3,43226 | 9,81E-13 |
| ZNF253   | 10,76746 | 1,02E-12 |
| STEAP1   | -3,97064 | 1,09E-12 |
| RIMS4    | 7,742497 | 1,18E-12 |
| MDFIC    | -7,60464 | 1,19E-12 |
| HOXB4    | -7,17326 | 1,21E-12 |
| WNT5A    | 11,46682 | 1,23E-12 |
| DTX3     | 11,34728 | 1,23E-12 |
| PCDHB8   | 11,36375 | 1,23E-12 |
| EFNB2    | -3,01028 | 1,23E-12 |
| MPP1     | -5,06117 | 1,32E-12 |
| CNTNAP1  | -3,53213 | 1,34E-12 |
| NUP210L  | 8,532645 | 1,36E-12 |
| TMEM45B  | 11,32477 | 1,39E-12 |
| PCDH18   | 11,84248 | 1,40E-12 |
| BMP2     | 10,72257 | 1,41E-12 |
| CPNE8    | -11,4644 | 1,41E-12 |
| CYB561   | 1,941339 | 1,43E-12 |
| CPS1     | -2,53059 | 1,48E-12 |
| GGT6     | 11,07097 | 1,48E-12 |
| SCG2     | -11,3923 | 1,48E-12 |
| ZMIZ1    | 2,366659 | 1,55E-12 |
| SEMA4A   | 11,31692 | 1,56E-12 |
| GLIPR2   | -3,19006 | 1,57E-12 |
| AR       | 11,3025  | 1,62E-12 |
| GPNMB    | 5,079953 | 1,72E-12 |
| DTNA     | 3,14926  | 1,72E-12 |
| ZIC1     | 11,42183 | 1,76E-12 |
| CHFR     | 11,29398 | 1,80E-12 |
| SIAH2    | 2,838498 | 1,81E-12 |
| ARHGAP22 | -5,89348 | 1,85E-12 |
| PPARG    | -3,28104 | 1,86E-12 |
| GUCY1A2  | 11,29109 | 1,87E-12 |
| CAP2     | 2,908784 | 1,90E-12 |



|                       |          |          |
|-----------------------|----------|----------|
| ENDOD1                | -2,22301 | 2,11E-12 |
| C17orf51              | -3,86885 | 2,16E-12 |
| ZNF736                | 11,25414 | 2,28E-12 |
| AFAP1L1               | -8,50849 | 2,40E-12 |
| NCAM2                 | 11,36713 | 2,54E-12 |
| GLUD2                 | 4,370908 | 2,55E-12 |
| NRXN2                 | 3,941501 | 2,60E-12 |
| ST3GAL2               | -3,73564 | 2,62E-12 |
| SALL2                 | 11,21685 | 2,62E-12 |
| FAM222A- <del>l</del> | -5,39949 | 2,93E-12 |
| HOOK2                 | 2,144808 | 2,95E-12 |
| ICA1                  | 2,7244   | 2,97E-12 |
| TRIM15                | -5,74125 | 3,00E-12 |
| GRAMD1B               | -11,527  | 3,05E-12 |
| GNE                   | -11,3374 | 3,06E-12 |
| KITLG                 | -2,74975 | 3,14E-12 |
| GNPDA2                | -3,07857 | 3,15E-12 |
| DLG4                  | -3,73568 | 3,16E-12 |
| SLC25A22              | -2,32116 | 3,20E-12 |
| ZNF836                | 11,22624 | 3,28E-12 |
| PRNP                  | -2,92357 | 3,31E-12 |
| ZNF569                | 11,27038 | 3,33E-12 |
| EFHD1                 | 4,834432 | 3,33E-12 |
| ZNF429                | 11,17207 | 3,44E-12 |
| CHN1                  | 3,285688 | 3,46E-12 |
| ST6GAL1               | -3,88869 | 3,65E-12 |
| CRISPLD1              | 11,40441 | 3,73E-12 |
| EREG                  | -10,5891 | 3,80E-12 |
| SLC1A1                | -4,48019 | 3,83E-12 |
| RHBDF1                | 2,586804 | 3,84E-12 |
| ZNF681                | 11,13803 | 3,96E-12 |
| YAP1                  | -2,18588 | 4,16E-12 |
| TFAP2A                | 2,022446 | 4,20E-12 |
| WNT16                 | -11,6391 | 4,20E-12 |
| STAMBPL1              | -4,69643 | 4,30E-12 |
| OR51B4                | -11,3375 | 4,30E-12 |
| SLC10A4               | -8,41543 | 4,30E-12 |
| ZNF3                  | 2,22264  | 4,52E-12 |
| CABYR                 | 7,77318  | 4,67E-12 |
| TUBB2B                | 4,478789 | 4,69E-12 |
| PPM1D                 | 2,764958 | 4,78E-12 |
| CACNG4                | 10,51638 | 4,80E-12 |
| ELOVL2                | 5,984108 | 5,02E-12 |
| PAK1                  | -2,73746 | 5,49E-12 |
| FKBP11                | 3,672787 | 5,52E-12 |
| KCNJ12                | -11,2463 | 5,52E-12 |
| PCP4                  | 11,09588 | 5,69E-12 |
| TSPAN18               | -10,9152 | 5,97E-12 |
| RAPGEF5               | -3,47953 | 5,98E-12 |
| ADAM9                 | -2,24415 | 6,36E-12 |

|          |          |          |
|----------|----------|----------|
| PTRF     | -2,18849 | 6,42E-12 |
| PGM1     | -2,56053 | 6,49E-12 |
| CHD3     | 2,884938 | 6,54E-12 |
| DLC1     | 11,08037 | 6,64E-12 |
| PTPRM    | -11,1105 | 6,92E-12 |
| CA13     | -11,1089 | 7,16E-12 |
| PDZD4    | 5,617185 | 7,23E-12 |
| ASCL4    | 11,04836 | 7,36E-12 |
| PKP1     | 5,01429  | 7,68E-12 |
| C5orf38  | 11,10424 | 7,68E-12 |
| HBEGF    | -4,44605 | 8,11E-12 |
| KDM5B    | 2,450383 | 8,22E-12 |
| CNTNAP3B | -6,95317 | 8,35E-12 |
| TCEAL1   | 11,08384 | 8,39E-12 |
| DEF6     | -2,35262 | 8,59E-12 |
| TUBA4A   | -4,03402 | 8,61E-12 |
| OSBP2    | -2,35646 | 8,70E-12 |
| KCTD1    | 2,617638 | 8,70E-12 |
| C5       | 5,168708 | 8,85E-12 |
| HSD17B11 | -3,34304 | 8,89E-12 |
| TRIM33   | 2,014988 | 8,98E-12 |
| MAP9     | 11,05136 | 9,23E-12 |
| MIB2     | -2,43786 | 9,29E-12 |
| FAM3A    | 2,287626 | 9,29E-12 |
| PLEKHA4  | -4,1925  | 1,01E-11 |
| SH3RF2   | -4,49985 | 1,03E-11 |
| CR2      | -4,65141 | 1,09E-11 |
| ARHGDIG  | 10,95255 | 1,16E-11 |
| ABCB1    | -5,4807  | 1,25E-11 |
| NRAS     | 2,220258 | 1,25E-11 |
| SYN2     | -11,0478 | 1,28E-11 |
| RNF115   | 2,030407 | 1,32E-11 |
| OSMR     | -2,97279 | 1,32E-11 |
| RASSF3   | -2,29011 | 1,33E-11 |
| FGF2     | -7,44999 | 1,34E-11 |
| CFD      | -2,59558 | 1,36E-11 |
| CYTH2    | 2,043909 | 1,36E-11 |
| ASCL2    | 11,11481 | 1,40E-11 |
| FAM83F   | -4,19593 | 1,40E-11 |
| HOXB7    | -2,41256 | 1,41E-11 |
| TMCC3    | -4,1588  | 1,45E-11 |
| TDRD1    | 10,9041  | 1,50E-11 |
| TUG1     | 2,067018 | 1,50E-11 |
| CCDC3    | -3,22255 | 1,51E-11 |
| EFS      | 10,92228 | 1,52E-11 |
| PTP4A1   | -1,86041 | 1,54E-11 |
| RNF44    | 2,115074 | 1,59E-11 |
| ZP3      | 2,690277 | 1,61E-11 |
| HMGA1    | -2,37136 | 1,67E-11 |
| EFR3B    | 3,541953 | 1,76E-11 |

|           |          |          |
|-----------|----------|----------|
| CRMP1     | 10,91431 | 1,80E-11 |
| ZNF718    | 10,87713 | 1,80E-11 |
| ITGB1     | -1,95023 | 1,81E-11 |
| ZNF215    | -11,175  | 1,82E-11 |
| ATP6V0E2  | 2,550738 | 1,82E-11 |
| PLEKHO1   | 3,115719 | 1,87E-11 |
| IL27RA    | -2,4254  | 1,93E-11 |
| C16orf62  | -2,53191 | 1,96E-11 |
| ELL2      | -3,07486 | 2,01E-11 |
| FGFR2     | -2,64953 | 2,16E-11 |
| MEST      | 2,213713 | 2,20E-11 |
| LDHA      | -1,88176 | 2,23E-11 |
| CNPY4     | 3,793862 | 2,29E-11 |
| C2orf15   | 3,155564 | 2,32E-11 |
| CORO2B    | -5,44413 | 2,33E-11 |
| ZKSCAN1   | 1,946109 | 2,37E-11 |
| HOXC11    | 5,559583 | 2,46E-11 |
| DOCK11    | 5,342834 | 2,51E-11 |
| HIST2H2BE | 3,957239 | 2,53E-11 |
| TSPEAR    | 7,246436 | 2,56E-11 |
| RPS6KB1   | 2,270086 | 2,57E-11 |
| PAQR5     | -2,66229 | 2,62E-11 |
| SAMD5     | -10,8657 | 2,83E-11 |
| GUCY1A3   | 10,80245 | 2,90E-11 |
| ZNF813    | 10,8221  | 3,14E-11 |
| ZNF385B   | -4,03924 | 3,21E-11 |
| SPATA17   | 3,203401 | 3,33E-11 |
| TDRD5     | 7,220216 | 3,44E-11 |
| FLJ10038  | 2,784476 | 3,59E-11 |
| CRAT      | -3,59059 | 3,62E-11 |
| KCNK15    | 10,76651 | 3,76E-11 |
| DGKG      | -8,21844 | 4,23E-11 |
| MDK       | 1,878741 | 4,39E-11 |
| RGL3      | -5,19019 | 4,42E-11 |
| C5AR2     | 8,267219 | 4,47E-11 |
| TUSC1     | 10,70291 | 4,62E-11 |
| SEPN1     | -1,8717  | 4,67E-11 |
| C1QTNF9B  | 4,072267 | 4,89E-11 |
| APH1A     | 1,867201 | 4,93E-11 |
| KLK5      | -11,3291 | 5,02E-11 |
| ANXA9     | 3,99016  | 5,03E-11 |
| TRIM9     | -5,57122 | 5,26E-11 |
| GTF2IRD2B | 3,039445 | 5,26E-11 |
| CST1      | 10,69885 | 5,35E-11 |
| THNSL2    | 10,7595  | 5,54E-11 |
| NOS3      | -4,75212 | 5,67E-11 |
| PLAGL1    | -3,1507  | 5,85E-11 |
| LINC00665 | 10,04574 | 5,96E-11 |
| FOXA3     | -10,7404 | 6,07E-11 |
| ZNF793    | 10,66373 | 6,08E-11 |

|           |          |          |
|-----------|----------|----------|
| FAM174B   | 10,26047 | 6,09E-11 |
| ZFP3      | 10,03441 | 6,13E-11 |
| GPC4      | -2,41442 | 6,25E-11 |
| CYB5R2    | -10,7272 | 6,61E-11 |
| NOD2      | -4,74765 | 6,65E-11 |
| STK33     | -10,9046 | 6,75E-11 |
| FRG1CP    | -10,7184 | 6,76E-11 |
| HCG11     | 10,65442 | 7,18E-11 |
| GLI3      | 10,67472 | 7,20E-11 |
| RRAS      | -3,51107 | 7,29E-11 |
| CYBRD1    | -10,6994 | 7,73E-11 |
| SKAP1     | -10,6893 | 8,00E-11 |
| TSPAN5    | -2,99294 | 8,18E-11 |
| DPP4      | -6,17432 | 8,24E-11 |
| MAP2K6    | 5,378467 | 8,31E-11 |
| IFFO2     | -2,62044 | 8,46E-11 |
| CACNB3    | 2,138327 | 9,03E-11 |
| NPY1R     | 9,999126 | 9,14E-11 |
| GABRD     | -3,9352  | 9,19E-11 |
| RRBP1     | 2,351455 | 9,95E-11 |
| MPDZ      | 10,6193  | 1,04E-10 |
| TCEAL4    | 2,23975  | 1,04E-10 |
| AMOT      | 2,432876 | 1,09E-10 |
| FAM92A1   | -3,48553 | 1,10E-10 |
| LIMA1     | -2,64162 | 1,19E-10 |
| FGF12     | 10,61243 | 1,19E-10 |
| ST8SIA4   | 10,89405 | 1,25E-10 |
| CHD5      | -3,96576 | 1,26E-10 |
| ZNF331    | 10,76899 | 1,29E-10 |
| ITPKA     | -3,45364 | 1,34E-10 |
| NFAT5     | -2,40535 | 1,40E-10 |
| SYK       | 2,381224 | 1,44E-10 |
| RERG      | 5,562196 | 1,46E-10 |
| CHRM1     | 5,629867 | 1,52E-10 |
| HRH1      | -10,8233 | 1,53E-10 |
| FXD3      | 4,177195 | 1,53E-10 |
| FIS1      | 2,051355 | 1,53E-10 |
| FAM109B   | 6,105245 | 1,54E-10 |
| ENPP1     | -4,1837  | 1,57E-10 |
| CACNA2D1  | 4,149972 | 1,60E-10 |
| PDE4A     | -2,64381 | 1,62E-10 |
| LINC00941 | -10,9454 | 1,63E-10 |
| MCOLN2    | -4,04906 | 1,67E-10 |
| HOXA9     | -10,6713 | 1,68E-10 |
| ONECUT3   | -10,5921 | 1,69E-10 |
| SEC14L4   | -10,6095 | 1,72E-10 |
| FZD1      | 2,297711 | 1,75E-10 |
| TXNIP     | 13,33574 | 1,82E-10 |
| RUSC2     | -2,85179 | 1,84E-10 |
| NETO2     | 2,188264 | 1,86E-10 |

|           |          |          |
|-----------|----------|----------|
| PCDHB14   | 9,853789 | 1,87E-10 |
| ZNF606    | 10,53965 | 1,96E-10 |
| TFAP2E    | -5,61389 | 2,02E-10 |
| APBB1     | -3,59205 | 2,04E-10 |
| ZNF84     | 2,232072 | 2,09E-10 |
| CEACAM21  | 7,922992 | 2,09E-10 |
| PTGR1     | -2,82058 | 2,12E-10 |
| SPTB      | -5,142   | 2,13E-10 |
| PER1      | -2,41182 | 2,17E-10 |
| FAM131C   | -3,13684 | 2,21E-10 |
| PLXNA4    | 10,51262 | 2,27E-10 |
| TBX18     | -10,5103 | 2,30E-10 |
| ANKMY2    | -2,37594 | 2,36E-10 |
| C7orf50   | 2,046165 | 2,38E-10 |
| RORA      | 9,776096 | 2,44E-10 |
| ABLIM3    | -3,25261 | 2,65E-10 |
| ZNF433    | 10,39398 | 2,70E-10 |
| SGCE      | -10,4788 | 2,72E-10 |
| ANKH      | -2,18062 | 2,74E-10 |
| ZNF513    | -4,36109 | 2,84E-10 |
| PTPRG-AS1 | 5,598335 | 2,88E-10 |
| SORBS3    | -1,89944 | 2,95E-10 |
| MIR100HG  | -10,0955 | 3,07E-10 |
| MYRIP     | 4,309292 | 3,08E-10 |
| TCEAL3    | 9,781142 | 3,12E-10 |
| CAMK2B    | 5,118112 | 3,21E-10 |
| ZC4H2     | -7,87346 | 3,30E-10 |
| RNASEH2A  | 1,991426 | 3,35E-10 |
| DLGAP3    | 5,835799 | 3,55E-10 |
| SCCPDH    | 10,3586  | 3,56E-10 |
| TOX2      | -3,00156 | 3,58E-10 |
| FAM110C   | -4,12397 | 3,59E-10 |
| FAHD2B    | -3,22365 | 3,81E-10 |
| ODAM      | 10,32209 | 3,92E-10 |
| PLCG1     | 2,323092 | 3,93E-10 |
| CDA       | -10,5569 | 4,03E-10 |
| TGIF2     | 2,426455 | 4,26E-10 |
| ZMYND8    | 2,001815 | 4,29E-10 |
| EXO5      | 3,85125  | 4,40E-10 |
| PPP4R4    | -5,22528 | 4,40E-10 |
| SULT2B1   | 3,222378 | 4,51E-10 |
| EMP2      | 2,394297 | 4,53E-10 |
| ABCA7     | -2,22935 | 4,53E-10 |
| TIMP1     | -3,9747  | 4,54E-10 |
| C3orf52   | -4,93347 | 4,54E-10 |
| SDC2      | 9,662444 | 4,59E-10 |
| FAM53B    | 2,224632 | 4,75E-10 |
| CACNA2D2  | -3,4203  | 4,96E-10 |
| HOXB3     | -7,1358  | 5,01E-10 |
| AGMAT     | 10,3097  | 5,09E-10 |

|           |          |          |
|-----------|----------|----------|
| ABHD6     | -2,92235 | 5,14E-10 |
| KMT2C     | 1,916468 | 5,15E-10 |
| GAS6      | -2,46423 | 5,16E-10 |
| MB        | 4,820228 | 5,20E-10 |
| KRT222    | -10,5566 | 5,22E-10 |
| LINC00857 | -7,87    | 5,25E-10 |
| CDC42BPA  | -2,15169 | 5,34E-10 |
| OAF       | -2,6213  | 5,37E-10 |
| SGSM1     | -6,06804 | 5,46E-10 |
| EFNA5     | 3,590871 | 5,46E-10 |
| VWDE      | -4,06291 | 5,46E-10 |
| HEYL      | -3,08809 | 5,50E-10 |
| AHR       | 1,809939 | 5,63E-10 |
| SEC14L2   | -3,12474 | 5,76E-10 |
| TMEM173   | -6,05575 | 5,76E-10 |
| XBP1      | 2,856248 | 5,85E-10 |
| GSTM4     | 2,057406 | 5,99E-10 |
| PCDH7     | -2,52368 | 6,17E-10 |
| ARNTL2    | -2,6031  | 6,22E-10 |
| RDX       | -1,98493 | 6,32E-10 |
| GRHL2     | 2,304149 | 6,34E-10 |
| P3H1      | -2,12499 | 6,48E-10 |
| LETM2     | -4,50214 | 6,82E-10 |
| PBXIP1    | 4,062461 | 7,02E-10 |
| C3orf18   | -4,65949 | 7,09E-10 |
| SLC35F3   | -10,3119 | 7,16E-10 |
| CASC4     | -1,84239 | 7,20E-10 |
| DSCAM-AS  | 12,86646 | 7,23E-10 |
| CROT      | 10,47678 | 7,30E-10 |
| SERTAD2   | -2,09234 | 7,41E-10 |
| CSAG3     | -10,3762 | 7,74E-10 |
| CDC42SE1  | 1,893085 | 7,76E-10 |
| SFXN3     | -2,52453 | 7,96E-10 |
| TCN1      | -10,3158 | 8,12E-10 |
| AKR1C2    | 5,229524 | 8,12E-10 |
| CXCL16    | -2,01544 | 8,23E-10 |
| PPDPF     | 2,06442  | 8,23E-10 |
| SH3RF1    | -2,70766 | 8,23E-10 |
| SLC8A1    | 10,18213 | 8,38E-10 |
| MESP1     | -6,33205 | 8,44E-10 |
| AIF1L     | 1,880397 | 8,44E-10 |
| GDF15     | -3,53707 | 8,73E-10 |
| PGR       | 10,72354 | 8,94E-10 |
| HTR1D     | -3,93408 | 9,09E-10 |
| ANKIB1    | 1,849523 | 9,09E-10 |
| TRIOBP    | -2,4532  | 9,26E-10 |
| PCDHA10   | 10,19271 | 9,37E-10 |
| RBMS2     | -2,7487  | 9,46E-10 |
| TWF2      | -1,88005 | 9,71E-10 |
| EDN1      | 4,679466 | 9,96E-10 |

|           |          |          |
|-----------|----------|----------|
| ZNF420    | 10,18213 | 1,04E-09 |
| MANSC1    | 9,598229 | 1,04E-09 |
| SYNE1     | -4,44583 | 1,05E-09 |
| ENSA      | 1,939353 | 1,07E-09 |
| BTG3      | -3,01966 | 1,09E-09 |
| ITPRIPL1  | -9,92222 | 1,09E-09 |
| WDR72     | 2,399273 | 1,09E-09 |
| SNX9      | -1,91127 | 1,10E-09 |
| ZFPM2-AS1 | -10,2552 | 1,11E-09 |
| MEIS2     | -5,90482 | 1,12E-09 |
| NR1D1     | -2,39084 | 1,18E-09 |
| AP4E1     | 2,117218 | 1,18E-09 |
| ITPRIPL2  | -2,38329 | 1,18E-09 |
| POLE4     | 2,293708 | 1,18E-09 |
| ALOX15    | 9,914015 | 1,20E-09 |
| TRIP6     | 1,784935 | 1,20E-09 |
| LINC00839 | -10,327  | 1,21E-09 |
| FRAT2     | 3,705513 | 1,22E-09 |
| CDIP1     | -10,2092 | 1,27E-09 |
| ZNF783    | 2,562534 | 1,30E-09 |
| GALNT16   | 10,25475 | 1,32E-09 |
| CCDC92    | 2,854919 | 1,34E-09 |
| MFI2      | -2,56038 | 1,36E-09 |
| STARD13   | 2,646804 | 1,46E-09 |
| HOXB5     | -10,2536 | 1,46E-09 |
| RIN3      | -2,65944 | 1,48E-09 |
| ZNF362    | 2,599538 | 1,55E-09 |
| STXBP6    | 6,178001 | 1,55E-09 |
| SPRED2    | -1,80989 | 1,56E-09 |
| TTC9      | 2,592793 | 1,58E-09 |
| AARD      | 10,06503 | 1,62E-09 |
| ZNF117    | 2,807851 | 1,62E-09 |
| SH2D5     | -3,40676 | 1,64E-09 |
| EZR       | -2,026   | 1,65E-09 |
| WSCD1     | 10,08866 | 1,65E-09 |
| RAD51C    | 1,814054 | 1,67E-09 |
| NR4A2     | -3,12812 | 1,68E-09 |
| SHISA9    | 10,10757 | 1,73E-09 |
| VTI1B     | 2,018681 | 1,78E-09 |
| C7orf13   | 3,811607 | 1,79E-09 |
| ZNF287    | 10,03735 | 1,86E-09 |
| ZNF570    | 10,04642 | 1,86E-09 |
| TSHZ3     | 10,4942  | 1,88E-09 |
| P2RY6     | 8,627831 | 1,90E-09 |
| ERBB4     | 6,180831 | 1,96E-09 |
| GADD45G   | 4,633238 | 1,97E-09 |
| HPDL      | 10,03728 | 1,98E-09 |
| TDG       | 1,744736 | 1,99E-09 |
| GUSBP1    | 5,011143 | 2,02E-09 |
| ZNF256    | 10,02653 | 2,02E-09 |

|           |          |          |
|-----------|----------|----------|
| VLDLR     | 10,4626  | 2,04E-09 |
| NKAIN1    | 3,162889 | 2,05E-09 |
| EHD3      | 10,10059 | 2,05E-09 |
| ZNF688    | 3,280347 | 2,06E-09 |
| INPP5F    | -2,04873 | 2,09E-09 |
| PPAP2C    | -1,8989  | 2,17E-09 |
| BLVRA     | 2,100931 | 2,20E-09 |
| SASH1     | -3,19627 | 2,20E-09 |
| ASPHD2    | -2,91914 | 2,22E-09 |
| FOXRED2   | 2,011704 | 2,25E-09 |
| ADGRL2    | 6,678928 | 2,29E-09 |
| HNF1B     | -10,1716 | 2,29E-09 |
| PCDHA12   | 10,05006 | 2,30E-09 |
| ERI1      | -1,85543 | 2,33E-09 |
| KHDRBS3   | -5,43735 | 2,36E-09 |
| DAB2      | -5,11286 | 2,36E-09 |
| TMEM180   | -2,27574 | 2,37E-09 |
| ZNF785    | 9,990072 | 2,39E-09 |
| ITPKB     | 2,659777 | 2,44E-09 |
| PLEKHF2   | 2,113913 | 2,44E-09 |
| PRDM4     | 1,894095 | 2,51E-09 |
| DEPDC7    | -10,0856 | 2,56E-09 |
| PLOD1     | -2,09801 | 2,57E-09 |
| C2orf68   | 2,25322  | 2,58E-09 |
| PLCB3     | -1,85191 | 2,58E-09 |
| FAM71E1   | -10,0851 | 2,58E-09 |
| TMEM229E  | 3,881488 | 2,60E-09 |
| MAP4K2    | -2,18615 | 2,62E-09 |
| PRDX2     | 1,791747 | 2,65E-09 |
| GNAS      | 1,643304 | 2,69E-09 |
| PCSK6     | 2,73556  | 2,72E-09 |
| NSUN7     | 9,971846 | 2,75E-09 |
| LINC00460 | -10,1672 | 2,77E-09 |
| GJB2      | -2,93443 | 2,88E-09 |
| MAZ       | 1,736031 | 2,88E-09 |
| ETHE1     | -2,57736 | 2,90E-09 |
| MYLIP     | 2,813805 | 2,90E-09 |
| SRPX2     | -10,1111 | 2,93E-09 |
| USH1C     | -9,65535 | 2,97E-09 |
| FAM179B   | 3,257734 | 3,05E-09 |
| DEGS2     | 4,932816 | 3,08E-09 |
| AP4M1     | 2,203673 | 3,11E-09 |
| ZNF514    | 2,619152 | 3,11E-09 |
| ZNF682    | 9,942601 | 3,17E-09 |
| SLC12A4   | -3,7301  | 3,30E-09 |
| GRK5      | -3,20683 | 3,31E-09 |
| ZNF841    | 9,260573 | 3,32E-09 |
| TLR6      | -10,035  | 3,40E-09 |
| PNMA1     | 2,13076  | 3,43E-09 |
| A1BG-AS1  | 9,941424 | 3,45E-09 |



|           |          |          |
|-----------|----------|----------|
| GOLGA8B   | -4,00872 | 3,45E-09 |
| GNAL      | -3,22038 | 3,54E-09 |
| DCLRE1B   | 2,140602 | 3,60E-09 |
| PLA2G7    | -10,037  | 3,63E-09 |
| PAQR3     | -2,13648 | 3,74E-09 |
| MYOM3     | -10,2031 | 3,79E-09 |
| TYSND1    | 2,027593 | 3,84E-09 |
| ALDH6A1   | 2,261391 | 3,95E-09 |
| LYPD1     | 6,716244 | 3,97E-09 |
| TFF3      | 9,93152  | 4,03E-09 |
| DDX60L    | -2,98527 | 4,18E-09 |
| MAN1A1    | -2,27309 | 4,18E-09 |
| ITM2C     | -2,38583 | 4,30E-09 |
| SETMAR    | 2,228544 | 4,30E-09 |
| SOX2      | 9,224737 | 4,34E-09 |
| TDRKH     | 2,947813 | 4,45E-09 |
| C22orf34  | -10,0852 | 4,45E-09 |
| C18orf63  | 9,924395 | 4,45E-09 |
| STXBP1    | -1,97841 | 4,47E-09 |
| RASL11B   | 9,221306 | 4,54E-09 |
| RAB11FIP5 | -3,00058 | 4,61E-09 |
| NCKAP5    | 5,526153 | 4,71E-09 |
| GRAMD2    | -10,0555 | 4,84E-09 |
| TNFSF9    | -3,81411 | 4,87E-09 |
| GALC      | 9,956345 | 4,98E-09 |
| CPD       | -1,94309 | 5,00E-09 |
| HSD17B12  | -1,75029 | 5,04E-09 |
| NMNAT2    | 9,886784 | 5,15E-09 |
| FAM214A   | 3,940034 | 5,19E-09 |
| SHROOM2   | -2,44359 | 5,19E-09 |
| KNOP1     | 1,887842 | 5,33E-09 |
| CHPT1     | 2,382204 | 5,33E-09 |
| LONRF3    | -7,59073 | 5,50E-09 |
| SLCO1B3   | -10,0468 | 5,54E-09 |
| ETV1      | -9,51568 | 5,56E-09 |
| SMIM3     | -2,26626 | 5,60E-09 |
| LINC00925 | 9,845905 | 5,74E-09 |
| TMEM56    | -2,72315 | 6,03E-09 |
| ZNF365    | -5,02981 | 6,39E-09 |
| PDCD4     | 2,765784 | 6,49E-09 |
| SSTR5     | -9,92169 | 6,49E-09 |
| TCF7      | -2,19724 | 6,68E-09 |
| TMEM151   | -3,93421 | 6,69E-09 |
| LZTS1     | -9,9183  | 6,69E-09 |
| EMC3      | 2,251829 | 6,78E-09 |
| TESC      | -2,89551 | 6,81E-09 |
| SPTSSB    | 3,290964 | 7,01E-09 |
| HNF4A     | -4,79706 | 7,01E-09 |
| B3GNT5    | -4,25692 | 7,05E-09 |
| ALAS1     | -1,91799 | 7,15E-09 |

|           |          |          |
|-----------|----------|----------|
| LAMA2     | -4,1632  | 7,36E-09 |
| SLC24A3   | 9,779913 | 7,64E-09 |
| PLAT      | -9,9387  | 7,73E-09 |
| MCAM      | -2,98274 | 7,95E-09 |
| ENTPD1    | 4,848459 | 8,01E-09 |
| ZYG11A    | 9,930993 | 8,15E-09 |
| RABIF     | 2,390583 | 8,20E-09 |
| GAREML    | -2,43865 | 8,28E-09 |
| ADAP2     | -3,04532 | 8,39E-09 |
| PPP1R13B  | 2,050257 | 8,46E-09 |
| EHD4      | -1,92183 | 8,49E-09 |
| GCDH      | 1,913674 | 8,54E-09 |
| ZBED9     | 7,440357 | 8,65E-09 |
| KLHL2     | -2,18635 | 8,70E-09 |
| WDR90     | -2,80533 | 8,86E-09 |
| SHISA8    | -4,01094 | 8,89E-09 |
| TLE3      | 1,633884 | 9,08E-09 |
| HPN       | 9,114277 | 9,21E-09 |
| CGN       | 2,08862  | 9,23E-09 |
| ZNF790-AS | 9,749057 | 9,40E-09 |
| ZNF747    | 2,644983 | 9,43E-09 |
| ACOX2     | -6,94886 | 9,86E-09 |
| FKBP10    | 1,781273 | 9,91E-09 |
| ARHGEF10  | -2,48991 | 9,98E-09 |
| SLC6A8    | -2,47343 | 9,99E-09 |
| CPVL      | -4,14445 | 1,02E-08 |
| RDH10     | -2,79265 | 1,02E-08 |
| FUT8      | 1,975949 | 1,02E-08 |
| CCAT1     | -9,97463 | 1,03E-08 |
| PAM       | -2,06329 | 1,03E-08 |
| PLEKHA2   | -2,55742 | 1,06E-08 |
| NGFR      | -3,63126 | 1,07E-08 |
| ZNF503    | -2,34379 | 1,09E-08 |
| TLX3      | -9,82887 | 1,10E-08 |
| TRPM7     | 2,312427 | 1,10E-08 |
| SKIDA1    | 4,989646 | 1,13E-08 |
| TTC30B    | 4,551786 | 1,14E-08 |
| GSTA4     | 4,104191 | 1,14E-08 |
| C2orf70   | -9,8477  | 1,18E-08 |
| PARD3B    | 4,348136 | 1,18E-08 |
| EXOC4     | 1,892986 | 1,18E-08 |
| C21orf33  | 2,00481  | 1,19E-08 |
| AHI1      | -2,19541 | 1,19E-08 |
| ACOT11    | -3,73568 | 1,21E-08 |
| SNX7      | -3,19604 | 1,23E-08 |
| AP4B1     | 2,163967 | 1,24E-08 |
| TNFSF12   | -9,80701 | 1,25E-08 |
| C1orf233  | 2,740595 | 1,27E-08 |
| FAM89A    | -3,36446 | 1,27E-08 |
| SLAIN1    | 9,752107 | 1,28E-08 |

|            |          |          |
|------------|----------|----------|
| DGKD       | -2,05299 | 1,29E-08 |
| ZNF732     | 9,775242 | 1,31E-08 |
| C12orf56   | 9,686908 | 1,32E-08 |
| HOXA7      | -4,53382 | 1,33E-08 |
| CENPB      | 1,82637  | 1,35E-08 |
| EPHA6      | 9,674417 | 1,36E-08 |
| SERINC2    | -2,6526  | 1,44E-08 |
| RASGRP2    | -4,37511 | 1,44E-08 |
| RABGGTB    | -1,76775 | 1,44E-08 |
| MAGEH1     | 9,717176 | 1,45E-08 |
| CAMK4      | -4,09892 | 1,48E-08 |
| SPESP1     | 9,043149 | 1,51E-08 |
| RNF157     | 4,518528 | 1,51E-08 |
| TPBG       | 1,78918  | 1,52E-08 |
| ARL14EPL   | -10,0916 | 1,56E-08 |
| PHAX       | 1,667411 | 1,56E-08 |
| SYT12      | 3,200889 | 1,57E-08 |
| SLC26A4-A' | 9,647384 | 1,58E-08 |
| BATF       | 9,749078 | 1,58E-08 |
| MAFG       | -1,8236  | 1,58E-08 |
| CD274      | -6,77598 | 1,59E-08 |
| LXN        | 10,17949 | 1,62E-08 |
| C6orf223   | -5,35127 | 1,62E-08 |
| JPH3       | 6,439798 | 1,63E-08 |
| RGS10      | -1,81359 | 1,64E-08 |
| ZNF486     | 7,302662 | 1,64E-08 |
| EFNA4      | 1,984843 | 1,66E-08 |
| ASCL1      | 9,739251 | 1,68E-08 |
| CYP2J2     | 3,341183 | 1,72E-08 |
| CXCL12     | 9,645271 | 1,72E-08 |
| ANKRD18B   | 9,650536 | 1,72E-08 |
| ADGRE5     | -2,3827  | 1,75E-08 |
| DDX3Y      | -9,79609 | 1,75E-08 |
| SEL1L3     | -1,89135 | 1,75E-08 |
| TRMT2B     | 2,140339 | 1,75E-08 |
| TRHDE      | -9,93298 | 1,92E-08 |
| CHST10     | 9,101843 | 1,93E-08 |
| NMU        | -2,25717 | 1,97E-08 |
| DCBLD1     | -2,38764 | 1,98E-08 |
| ASRGL1     | -2,30575 | 1,99E-08 |
| FUT4       | -2,87907 | 2,01E-08 |
| GAS7       | -7,47853 | 2,05E-08 |
| NOTUM      | -2,68759 | 2,10E-08 |
| ZNF559     | -9,70794 | 2,20E-08 |
| LINC01405  | -9,7163  | 2,22E-08 |
| DECR2      | 2,091113 | 2,27E-08 |
| RNF141     | -2,35303 | 2,27E-08 |
| ANKRD19P   | -9,79436 | 2,27E-08 |
| SLC30A3    | -2,61664 | 2,33E-08 |
| NEDD4L     | -2,19001 | 2,34E-08 |

|           |          |          |
|-----------|----------|----------|
| MYO5C     | 1,87486  | 2,37E-08 |
| TSPAN13   | 2,046396 | 2,38E-08 |
| CHST8     | 9,555086 | 2,55E-08 |
| LINC00052 | 9,925515 | 2,59E-08 |
| ZNF687    | 1,874562 | 2,61E-08 |
| ZNF175    | -9,6982  | 2,66E-08 |
| CECR2     | -3,91673 | 2,72E-08 |
| PLCL2     | -5,91234 | 2,77E-08 |
| ELOVL3    | -6,58948 | 2,77E-08 |
| ZFP62     | 1,753824 | 2,77E-08 |
| SLC2A1    | -2,14455 | 2,81E-08 |
| HPCAL4    | -9,29894 | 2,85E-08 |
| FAM198B   | 3,148541 | 2,87E-08 |
| IFNGR2    | -2,11514 | 2,89E-08 |
| PEAR1     | -9,51512 | 2,89E-08 |
| HEXA      | 1,686515 | 2,89E-08 |
| PNRC1     | 2,131793 | 2,99E-08 |
| DAPK1     | -4,99087 | 3,06E-08 |
| MAMDC2    | -9,68266 | 3,11E-08 |
| TMED3     | 1,793289 | 3,13E-08 |
| LOC28333E | 2,792935 | 3,14E-08 |
| LIPE      | -7,37626 | 3,17E-08 |
| MLH1      | 2,778959 | 3,18E-08 |
| RAB15     | 2,729477 | 3,23E-08 |
| SDK1      | 7,223527 | 3,23E-08 |
| EPN3      | 2,67355  | 3,33E-08 |
| BCAR1     | 2,253433 | 3,34E-08 |
| CHGA      | 8,803906 | 3,39E-08 |
| ME2       | -1,73458 | 3,39E-08 |
| MSN       | -9,63986 | 3,44E-08 |
| C9orf3    | 2,228483 | 3,44E-08 |
| ADI1      | 2,141894 | 3,48E-08 |
| TNFRSF21  | -1,61184 | 3,57E-08 |
| ADAP1     | -2,17598 | 3,60E-08 |
| KSR1      | -2,74078 | 3,72E-08 |
| SAYSD1    | 1,864175 | 3,77E-08 |
| HKR1      | 2,24124  | 3,83E-08 |
| RGL2      | 1,935081 | 3,90E-08 |
| ZNF529    | 9,477409 | 3,91E-08 |
| CRACR2B   | 2,833831 | 4,07E-08 |
| CACNB4    | -4,77269 | 4,08E-08 |
| CLN6      | 1,727275 | 4,10E-08 |
| DAAM1     | 2,301614 | 4,12E-08 |
| ZNF738    | 2,345098 | 4,12E-08 |
| HKDC1     | -7,31257 | 4,29E-08 |
| SYT13     | -4,87105 | 4,30E-08 |
| ACSS1     | 9,525366 | 4,31E-08 |
| DFNA5     | -9,69195 | 4,32E-08 |
| PLK2      | -2,45119 | 4,34E-08 |
| EDNRA     | -9,59826 | 4,40E-08 |

|           |          |          |
|-----------|----------|----------|
| NOVA1     | 9,512227 | 4,44E-08 |
| TBCK      | 1,936815 | 4,49E-08 |
| LRRC75B   | 3,103118 | 4,51E-08 |
| PTPRH     | -4,58919 | 4,67E-08 |
| ACOX3     | 2,268667 | 4,67E-08 |
| CLCC1     | 2,014618 | 4,68E-08 |
| ECHDC1    | -1,96399 | 4,83E-08 |
| RAB27B    | 2,482879 | 4,90E-08 |
| ERVMER34  | -2,52862 | 4,91E-08 |
| ATP9A     | 2,069349 | 5,05E-08 |
| DDX10     | -1,69015 | 5,08E-08 |
| CBX2      | 2,24423  | 5,21E-08 |
| TGFB1     | -1,88461 | 5,22E-08 |
| TMX3      | -1,95153 | 5,29E-08 |
| METTL9    | 1,708945 | 5,31E-08 |
| ZNF605    | 9,566085 | 5,42E-08 |
| ZNF85     | 3,03658  | 5,43E-08 |
| NPM2      | -9,5451  | 5,45E-08 |
| LINC01296 | 3,074238 | 5,49E-08 |
| ZNF480    | 1,960362 | 5,49E-08 |
| ZFP69     | 9,446151 | 5,66E-08 |
| RAB37     | -9,63633 | 5,70E-08 |
| ADGRG5    | -9,54377 | 5,71E-08 |
| AGRN      | 2,124906 | 5,71E-08 |
| SLC9A5    | -3,90886 | 5,75E-08 |
| CDYL2     | 8,780957 | 5,75E-08 |
| SCARB2    | 1,717776 | 5,75E-08 |
| A1BG      | 5,288871 | 5,77E-08 |
| BEND5     | 9,441253 | 5,82E-08 |
| BACH1     | -2,12541 | 5,98E-08 |
| MALRD1    | 9,524656 | 6,03E-08 |
| CBLB      | 2,239312 | 6,03E-08 |
| DNER      | -6,62186 | 6,14E-08 |
| HOOK3     | -1,98628 | 6,18E-08 |
| ARMCX6    | 2,024245 | 6,20E-08 |
| ZMYND11   | 1,946272 | 6,22E-08 |
| PRSS8     | 1,913119 | 6,34E-08 |
| RFTN1     | -3,27317 | 6,37E-08 |
| MRPS25    | 1,743917 | 6,52E-08 |
| SH2D4A    | -1,873   | 6,74E-08 |
| KIAA1549  | 2,032946 | 6,80E-08 |
| DISP2     | -7,25807 | 6,93E-08 |
| AMN1      | -2,5042  | 7,03E-08 |
| ANXA2     | -1,48404 | 7,13E-08 |
| EFHD2     | -1,83665 | 7,16E-08 |
| EN2       | 3,745561 | 7,22E-08 |
| RBPMS2    | -2,34354 | 7,36E-08 |
| FAM195A   | 1,754915 | 7,41E-08 |
| CTSF      | 9,406006 | 7,42E-08 |
| NUDT16P1  | -9,50787 | 7,50E-08 |

|          |          |          |
|----------|----------|----------|
| PCDHB6   | 9,391271 | 7,52E-08 |
| LUCAT1   | -5,503   | 7,52E-08 |
| SDC4     | -2,95833 | 7,55E-08 |
| CCT8     | -1,46849 | 7,56E-08 |
| ASS1     | 2,957946 | 7,56E-08 |
| TTC28    | 4,016185 | 7,61E-08 |
| CADPS2   | -4,51254 | 7,61E-08 |
| FAM124A  | -4,60249 | 7,73E-08 |
| LIN7C    | -1,97813 | 7,89E-08 |
| TMEM183  | 1,653863 | 7,90E-08 |
| ZNF347   | 8,699581 | 8,01E-08 |
| HECW1    | -9,4763  | 8,03E-08 |
| TUBA3E   | 9,425213 | 8,09E-08 |
| ITFG3    | 2,099152 | 8,11E-08 |
| KCNQ1    | -3,79296 | 8,16E-08 |
| OSBPL5   | -1,97249 | 8,18E-08 |
| WWOX     | 2,059285 | 8,22E-08 |
| SLC22A23 | 1,63803  | 8,26E-08 |
| RAB30    | 2,281207 | 8,33E-08 |
| CECR7    | -7,24748 | 8,33E-08 |
| GSTZ1    | 2,141121 | 8,39E-08 |
| YIF1A    | 1,762522 | 8,45E-08 |
| TBX2-AS1 | 7,109945 | 8,56E-08 |
| ATP8B3   | -4,81593 | 8,63E-08 |
| CBFB     | -1,60534 | 8,76E-08 |
| ERC2     | 9,323958 | 8,76E-08 |
| PITX2    | -3,25187 | 8,78E-08 |
| RAB31    | -2,51749 | 8,93E-08 |
| ZNF311   | 9,542774 | 8,94E-08 |
| NF1      | 1,965234 | 9,03E-08 |
| PRICKLE2 | 10,51538 | 9,06E-08 |
| MEIS3P1  | 8,661691 | 9,07E-08 |
| JAK1     | -1,7092  | 9,13E-08 |
| CHRM3    | 9,315749 | 9,25E-08 |
| SLC25A24 | 1,681187 | 9,38E-08 |
| CCL2     | 9,538318 | 9,62E-08 |
| ARPP19   | 1,538054 | 9,63E-08 |
| ZNF790   | 9,34993  | 9,73E-08 |
| HLA-C    | -3,12473 | 9,73E-08 |
| ZNF710   | 1,873154 | 9,76E-08 |
| PTPRE    | -3,65169 | 9,79E-08 |
| XPNPEP1  | -1,77098 | 9,86E-08 |
| NYAP1    | -4,17569 | 9,86E-08 |
| GLT8D2   | -9,50065 | 1,01E-07 |
| PIK3CD   | -3,41553 | 1,01E-07 |
| SH3BP5   | 1,714315 | 1,04E-07 |
| NLRC5    | -4,13293 | 1,05E-07 |
| OR51B2   | -9,4242  | 1,06E-07 |
| C19orf43 | 1,456915 | 1,06E-07 |
| SIDT1    | 8,610801 | 1,07E-07 |

|           |          |          |
|-----------|----------|----------|
| TEX15     | 9,284698 | 1,08E-07 |
| CASP6     | 1,926381 | 1,09E-07 |
| TNFSF13   | 5,758712 | 1,09E-07 |
| TNFRSF10B | -2,61686 | 1,10E-07 |
| CKMT1A    | 2,355711 | 1,10E-07 |
| ZNF649    | -9,47761 | 1,10E-07 |
| PAX6      | -9,45952 | 1,11E-07 |
| UNC5A     | -2,71415 | 1,11E-07 |
| NYNRIN    | 6,260787 | 1,11E-07 |
| SLC39A14  | -2,34903 | 1,12E-07 |
| TMC8      | -4,19618 | 1,12E-07 |
| ALDH5A1   | 2,111923 | 1,13E-07 |
| LINC01004 | 3,927868 | 1,15E-07 |
| GTF3A     | 1,733543 | 1,15E-07 |
| PSD4      | 2,149147 | 1,16E-07 |
| APRT      | 1,665382 | 1,17E-07 |
| PCDHB9    | 8,566209 | 1,18E-07 |
| GRIN2B    | -9,73315 | 1,19E-07 |
| PLCH1     | 1,835688 | 1,19E-07 |
| SLITRK4   | 9,311774 | 1,19E-07 |
| FRAS1     | -1,84247 | 1,21E-07 |
| SAMD3     | -9,39986 | 1,22E-07 |
| HSPB1     | 1,741955 | 1,24E-07 |
| RUNX1     | -1,89485 | 1,27E-07 |
| HLA-DRA   | -9,56206 | 1,28E-07 |
| FOXO3     | -2,12285 | 1,32E-07 |
| ZNF630    | 9,243833 | 1,34E-07 |
| LINC01116 | 9,235918 | 1,41E-07 |
| SLC17A5   | -2,48405 | 1,41E-07 |
| CYP1A1    | 6,361402 | 1,42E-07 |
| RBM8A     | 1,552107 | 1,42E-07 |
| DARS2     | 1,668677 | 1,42E-07 |
| ADAT1     | 1,69774  | 1,45E-07 |
| ZNF568    | 9,43699  | 1,47E-07 |
| PCDHGB5   | 9,2236   | 1,49E-07 |
| RMI2      | 2,188479 | 1,50E-07 |
| RNLS      | 8,523526 | 1,51E-07 |
| C5orf42   | -9,36039 | 1,51E-07 |
| AASS      | -9,38713 | 1,51E-07 |
| ITPRIP    | -3,85989 | 1,52E-07 |
| WDR17     | 9,217789 | 1,55E-07 |
| ADAMTSL5  | -2,47271 | 1,56E-07 |
| ARHGEF4   | -2,3756  | 1,56E-07 |
| USP8      | 1,491606 | 1,56E-07 |
| SLC35E4   | -2,66164 | 1,58E-07 |
| SLC38A2   | -2,00339 | 1,61E-07 |
| LINC01128 | -2,39993 | 1,61E-07 |
| PACSIN3   | 1,569698 | 1,65E-07 |
| MKRN3     | -9,40991 | 1,65E-07 |
| FUT9      | 9,203601 | 1,65E-07 |

|           |          |          |
|-----------|----------|----------|
| AKAP9     | 1,927959 | 1,66E-07 |
| LYSMD1    | 2,272687 | 1,66E-07 |
| ACOT4     | 9,232998 | 1,74E-07 |
| FAM19A5   | 9,258364 | 1,75E-07 |
| IRF5      | -2,56725 | 1,79E-07 |
| CCDC113   | -2,10629 | 1,80E-07 |
| NRG1      | -9,68195 | 1,81E-07 |
| NNT-AS1   | 8,650487 | 1,81E-07 |
| AGPAT4    | -3,49739 | 1,82E-07 |
| LEO1      | 1,827221 | 1,82E-07 |
| ZNF432    | 3,683542 | 1,82E-07 |
| PCDHGB1   | 8,484323 | 1,84E-07 |
| NFIL3     | -3,63209 | 1,86E-07 |
| PRKCQ-AS1 | -9,32186 | 1,87E-07 |
| SYNPO2    | 3,389678 | 1,90E-07 |
| RTN4RL1   | 2,50351  | 1,91E-07 |
| TBC1D8B   | -3,11373 | 1,92E-07 |
| GABPB1    | 2,100995 | 1,92E-07 |
| SULT4A1   | -9,33294 | 1,94E-07 |
| TIPARP    | -1,77041 | 1,94E-07 |
| MORC4     | -1,63007 | 1,96E-07 |
| SCARA3    | -2,0367  | 1,97E-07 |
| BMP4      | -3,07711 | 1,99E-07 |
| NUDT4     | 1,822538 | 2,01E-07 |
| TMPRSS2   | 9,233351 | 2,07E-07 |
| COL9A3    | -2,26361 | 2,08E-07 |
| DUSP7     | -2,48783 | 2,10E-07 |
| SMAD3     | -2,14474 | 2,12E-07 |
| MET       | -1,85896 | 2,14E-07 |
| EML1      | 1,977893 | 2,14E-07 |
| DOCK8     | 5,693179 | 2,14E-07 |
| GPR27     | 9,182907 | 2,15E-07 |
| GNB2      | 1,509207 | 2,18E-07 |
| PLBD1     | 9,217509 | 2,19E-07 |
| DDX43     | 9,189127 | 2,19E-07 |
| FHAD1     | -4,95665 | 2,19E-07 |
| MATN2     | 2,619744 | 2,22E-07 |
| TK2       | -2,35708 | 2,24E-07 |
| SLC35G2   | -9,55876 | 2,24E-07 |
| SEMA4C    | 1,883226 | 2,25E-07 |
| USB1      | -2,06396 | 2,25E-07 |
| PKIA      | -9,37491 | 2,26E-07 |
| KHK       | 1,879917 | 2,31E-07 |
| ZNF492    | 9,368543 | 2,32E-07 |
| ZNF91     | 1,97455  | 2,32E-07 |
| TMEM37    | 3,602128 | 2,32E-07 |
| GFPT2     | -2,44304 | 2,34E-07 |
| SNX14     | -1,59618 | 2,34E-07 |
| IL12A     | -5,85471 | 2,41E-07 |
| ZNF219    | 1,927092 | 2,42E-07 |



|           |          |          |
|-----------|----------|----------|
| SPINK5    | 9,359182 | 2,47E-07 |
| CD99L2    | 2,684981 | 2,47E-07 |
| MMAB      | 2,536147 | 2,53E-07 |
| PFKP      | -1,70791 | 2,54E-07 |
| RAET1E    | -9,28224 | 2,56E-07 |
| PDE4DIP   | 2,23327  | 2,58E-07 |
| STK4      | -1,53851 | 2,61E-07 |
| SSX2IP    | -1,80484 | 2,62E-07 |
| SGK223    | -1,90474 | 2,65E-07 |
| KRT81     | 4,7064   | 2,66E-07 |
| RNASEH2C  | 2,146267 | 2,71E-07 |
| BHLHE41   | -9,04123 | 2,72E-07 |
| COX6C     | 1,541953 | 2,75E-07 |
| HMGB3     | 1,880214 | 2,76E-07 |
| LOXL2     | -3,6978  | 2,76E-07 |
| TENM4     | 9,192565 | 2,76E-07 |
| KCTD20    | 1,556077 | 2,77E-07 |
| MFAP2     | -1,86344 | 2,77E-07 |
| LAMC3     | -2,68393 | 2,77E-07 |
| SLC16A7   | -4,05091 | 2,80E-07 |
| DLGAP1-AS | -4,10966 | 2,83E-07 |
| GLIS3     | -5,93284 | 2,85E-07 |
| NRXN3     | 8,609661 | 2,86E-07 |
| HBP1      | 3,046594 | 2,87E-07 |
| L3MBTL3   | -2,78943 | 2,87E-07 |
| TUBB2A    | -2,70548 | 2,90E-07 |
| PCDHA7    | 9,096418 | 2,91E-07 |
| EXTL2     | -2,23395 | 2,93E-07 |
| SLC35F5   | 2,028123 | 2,93E-07 |
| TRIB2     | -2,75099 | 2,94E-07 |
| SRRM3     | -2,54403 | 2,94E-07 |
| ARHGAP18  | -2,03035 | 2,95E-07 |
| MAPKBP1   | -2,2041  | 2,96E-07 |
| NME4      | 1,488699 | 2,99E-07 |
| POU3F3    | 9,199277 | 3,02E-07 |
| ZG16B     | 9,390358 | 3,04E-07 |
| TGFBR2    | -2,05029 | 3,04E-07 |
| SRMS      | -5,09989 | 3,05E-07 |
| TUBA3D    | 9,182269 | 3,05E-07 |
| CD68      | -3,25765 | 3,05E-07 |
| SLC35E3   | 2,063095 | 3,06E-07 |
| SUN3      | -9,2672  | 3,07E-07 |
| PRKCDBP   | -9,37374 | 3,08E-07 |
| PTPRU     | -1,6887  | 3,08E-07 |
| RBM4      | 1,634383 | 3,09E-07 |
| PEG10     | -3,96843 | 3,10E-07 |
| GABRQ     | -5,94736 | 3,13E-07 |
| CSNK2A1   | -1,45333 | 3,13E-07 |
| TNFRSF9   | -9,91175 | 3,16E-07 |
| ICK       | 2,152458 | 3,16E-07 |

|            |          |          |
|------------|----------|----------|
| TYRP1      | 6,962508 | 3,16E-07 |
| PPIC       | 1,741756 | 3,20E-07 |
| ZNF549     | 9,136305 | 3,20E-07 |
| RPSAP58    | 1,583874 | 3,22E-07 |
| PIK3CD-AS1 | -4,1005  | 3,26E-07 |
| NPAS2      | -2,1476  | 3,27E-07 |
| CRLF3      | -2,23457 | 3,27E-07 |
| SQRDL      | -2,67638 | 3,28E-07 |
| PHLPP1     | 1,865059 | 3,28E-07 |
| SERAC1     | -2,29861 | 3,31E-07 |
| PRUNE      | 1,774061 | 3,34E-07 |
| LMNB1      | 1,604023 | 3,42E-07 |
| RAB11FIP1  | -1,55723 | 3,42E-07 |
| RPRD2      | 1,513213 | 3,42E-07 |
| FUT11      | -2,25647 | 3,46E-07 |
| ZNF444     | 1,713764 | 3,47E-07 |
| PFKFB4     | -2,55463 | 3,52E-07 |
| AP5S1      | 1,873426 | 3,59E-07 |
| HPCAL1     | -2,10337 | 3,62E-07 |
| MMP16      | 9,108885 | 3,62E-07 |
| FUT2       | -9,19932 | 3,63E-07 |
| HTT        | 1,841837 | 3,65E-07 |
| ZNF697     | -2,57515 | 3,72E-07 |
| ZNF879     | 9,052249 | 3,72E-07 |
| ARHGAP31   | -8,65447 | 3,72E-07 |
| ZNRF3      | 2,114478 | 3,73E-07 |
| HIGD2A     | 1,469376 | 3,83E-07 |
| AIMP2      | 1,77489  | 3,85E-07 |
| DSP        | 1,499621 | 3,85E-07 |
| CAB39      | -1,51179 | 4,04E-07 |
| ZNF354C    | 9,049931 | 4,08E-07 |
| ZNF730     | 9,04158  | 4,11E-07 |
| PLS1       | -1,736   | 4,12E-07 |
| MUC5B      | 4,025338 | 4,27E-07 |
| SMCO4      | -3,09386 | 4,28E-07 |
| SERPINB5   | -3,91067 | 4,33E-07 |
| SLC4A11    | -2,65568 | 4,33E-07 |
| ATOH8      | 3,377525 | 4,35E-07 |
| SLC8B1     | -2,04993 | 4,41E-07 |
| MYL12A     | 1,61744  | 4,43E-07 |
| CBLC       | -2,51862 | 4,52E-07 |
| BCL2L2     | -1,85565 | 4,53E-07 |
| GLS2       | 8,285341 | 4,64E-07 |
| IAH1       | 1,907766 | 4,64E-07 |
| ZNF461     | 5,754477 | 4,67E-07 |
| CUX1       | 1,558002 | 4,68E-07 |
| ERO1B      | -4,99896 | 4,69E-07 |
| MGMT       | 2,00252  | 4,72E-07 |
| DNMT3A     | 2,081398 | 4,75E-07 |
| YRDC       | -1,7619  | 4,88E-07 |

|           |          |          |
|-----------|----------|----------|
| VASH1     | -2,72128 | 4,89E-07 |
| ZDHC24    | 2,240921 | 4,89E-07 |
| FAM110B   | 8,317516 | 4,91E-07 |
| INPP5J    | -2,64171 | 5,00E-07 |
| ZSCAN2    | 1,885709 | 5,02E-07 |
| CCDC69    | -3,25152 | 5,02E-07 |
| SLC27A6   | -3,72359 | 5,07E-07 |
| ZFP30     | 2,265902 | 5,16E-07 |
| LHX5      | -9,14195 | 5,18E-07 |
| LINC00623 | -2,81154 | 5,19E-07 |
| SGMS2     | -2,44311 | 5,19E-07 |
| CD22      | -5,89978 | 5,26E-07 |
| TEAD1     | -1,44303 | 5,31E-07 |
| LAT2      | -5,84704 | 5,41E-07 |
| THNSL1    | 1,712902 | 5,42E-07 |
| RABEP2    | 2,02285  | 5,43E-07 |
| FAM49B    | -1,44666 | 5,47E-07 |
| NTSR1     | -8,97437 | 5,54E-07 |
| RNASEL    | 2,318317 | 5,59E-07 |
| RBM20     | -3,32865 | 5,61E-07 |
| NPL       | 4,287969 | 5,67E-07 |
| GPR89A    | 2,147053 | 5,85E-07 |
| CHST3     | -3,31941 | 5,98E-07 |
| MECOM     | 2,553037 | 6,08E-07 |
| KLHL25    | 2,073694 | 6,11E-07 |
| ZNF141    | 9,005475 | 6,21E-07 |
| MB21D2    | 2,36369  | 6,22E-07 |
| PYGL      | -6,4857  | 6,28E-07 |
| CD99P1    | -3,74026 | 6,41E-07 |
| ANK3      | 1,959438 | 6,41E-07 |
| CHRNA1    | -2,59371 | 6,42E-07 |
| NGFRAP1   | 1,453684 | 6,55E-07 |
| RGS2      | -3,12599 | 6,64E-07 |
| RAB39B    | 9,654959 | 6,70E-07 |
| SLC4A3    | -2,26972 | 6,71E-07 |
| CCDC88A   | -1,90661 | 6,72E-07 |
| RGS20     | -9,08341 | 6,79E-07 |
| C14orf132 | 3,094059 | 6,83E-07 |
| VPS37B    | -1,86402 | 6,86E-07 |
| DR1       | -1,56417 | 6,96E-07 |
| GLS       | -1,68773 | 6,96E-07 |
| SUV420H2  | 2,084258 | 6,97E-07 |
| INPPL1    | 1,506216 | 7,03E-07 |
| MYH15     | -7,89818 | 7,04E-07 |
| ABHD11    | 1,725303 | 7,12E-07 |
| GNB4      | 8,17655  | 7,12E-07 |
| KIF20A    | 1,666874 | 7,13E-07 |
| ACTL10    | 8,925595 | 7,16E-07 |
| ATP11A    | -1,79009 | 7,45E-07 |
| CASP10    | -4,41288 | 7,46E-07 |

|           |          |          |
|-----------|----------|----------|
| PIGM      | 1,957669 | 7,48E-07 |
| ADGRE2    | -2,49843 | 7,51E-07 |
| JTB       | 1,503959 | 7,52E-07 |
| IDNK      | 3,918461 | 7,54E-07 |
| TMEM9     | 1,507252 | 7,55E-07 |
| CCDC88B   | -2,94288 | 7,70E-07 |
| POLRMT    | -1,71522 | 7,72E-07 |
| SH3BP4    | -1,76953 | 7,81E-07 |
| MAPK6     | 1,409954 | 7,82E-07 |
| FAR2      | 1,999445 | 7,87E-07 |
| NFATC1    | -2,00133 | 7,87E-07 |
| PSTPIP2   | -1,68456 | 7,92E-07 |
| CCZ1B     | 1,68709  | 8,01E-07 |
| RFX2      | -2,21855 | 8,14E-07 |
| CLDN2     | -9,11267 | 8,19E-07 |
| CNGB3     | 8,93504  | 8,24E-07 |
| HES6      | -2,4531  | 8,39E-07 |
| ST6GALNA4 | -9,08392 | 8,44E-07 |
| KIAA1551  | -1,49516 | 8,53E-07 |
| TMEM123   | -1,38663 | 8,57E-07 |
| KLRG2     | 5,609701 | 8,62E-07 |
| CCNYL2    | -9,10518 | 8,68E-07 |
| SLCO4A1   | -2,1404  | 8,71E-07 |
| SRXN1     | -2,53297 | 8,80E-07 |
| PRF1      | -9,04839 | 8,87E-07 |
| NR3C1     | 1,752949 | 8,90E-07 |
| TET2      | 2,049921 | 8,96E-07 |
| C2orf74   | 8,874604 | 9,26E-07 |
| PAQR4     | 1,694541 | 9,28E-07 |
| SGTB      | -2,91078 | 9,30E-07 |
| SLC1A3    | -2,77957 | 9,52E-07 |
| WIBG      | 1,751354 | 9,75E-07 |
| CDKN1C    | -6,26863 | 9,92E-07 |
| PNPLA5    | -9,16009 | 9,93E-07 |
| KCNJ3     | 5,390524 | 9,95E-07 |
| PACS2     | 1,456672 | 9,96E-07 |
| OLFML2A   | -3,23621 | 1,00E-06 |
| ZNF876P   | 8,857573 | 1,00E-06 |
| PRTFDC1   | 5,374482 | 1,01E-06 |
| CSF1      | -3,17485 | 1,01E-06 |
| ZC3HAV1L  | -9,18038 | 1,04E-06 |
| HCP5      | -5,36149 | 1,08E-06 |
| BOLA1     | 1,863883 | 1,08E-06 |
| ZNF502    | -9,03816 | 1,09E-06 |
| UPK2      | 7,119217 | 1,11E-06 |
| RIC3      | 8,917654 | 1,11E-06 |
| RND2      | 2,943894 | 1,11E-06 |
| LOC100507 | -9,04248 | 1,11E-06 |
| ATP5S     | 2,666272 | 1,11E-06 |
| IPO5P1    | 3,060541 | 1,11E-06 |

|           |          |          |
|-----------|----------|----------|
| GNL3      | -1,75638 | 1,12E-06 |
| C10orf82  | 4,431474 | 1,12E-06 |
| ECSIT     | 1,565681 | 1,12E-06 |
| RPF1      | -1,60503 | 1,14E-06 |
| TUB       | 8,829049 | 1,16E-06 |
| ANO5      | -8,98757 | 1,18E-06 |
| PTPRG     | -1,91447 | 1,18E-06 |
| SLC35A4   | 1,653571 | 1,18E-06 |
| B3GNT7    | -5,34439 | 1,19E-06 |
| PLEKHA7   | 2,541842 | 1,19E-06 |
| ARMC10    | 1,535503 | 1,21E-06 |
| NKX1-2    | -5,64095 | 1,21E-06 |
| COL27A1   | -2,93941 | 1,22E-06 |
| ZNF503-AS | -8,97938 | 1,22E-06 |
| PSMC2     | 1,431146 | 1,23E-06 |
| ZNF675    | 2,042465 | 1,25E-06 |
| HIC1      | 6,077444 | 1,27E-06 |
| HCN2      | 2,464451 | 1,27E-06 |
| GCNT3     | -8,97114 | 1,27E-06 |
| PTPRN2    | -5,36201 | 1,28E-06 |
| PDE2A     | -3,65184 | 1,29E-06 |
| TNFAIP3   | -3,46244 | 1,30E-06 |
| LOC100125 | 2,806201 | 1,33E-06 |
| ANO6      | -1,65875 | 1,33E-06 |
| ARSJ      | -6,36641 | 1,35E-06 |
| RAVER2    | -1,99409 | 1,38E-06 |
| EYA2      | 8,991706 | 1,38E-06 |
| LGALS3    | -2,24452 | 1,39E-06 |
| ST6GALNA4 | -1,80035 | 1,39E-06 |
| C17orf104 | 9,025804 | 1,39E-06 |
| ITGA2     | -2,07468 | 1,39E-06 |
| PRDM6     | 5,140298 | 1,42E-06 |
| ATF6B     | 1,556878 | 1,42E-06 |
| CACFD1    | 2,045288 | 1,42E-06 |
| ABCG1     | 2,662456 | 1,42E-06 |
| ZNF818P   | 5,003212 | 1,43E-06 |
| ZNF618    | 1,802342 | 1,45E-06 |
| TNIK      | -1,99769 | 1,45E-06 |
| PBLD      | 3,14164  | 1,47E-06 |
| NRG3      | 8,846041 | 1,51E-06 |
| HK2       | -1,96455 | 1,51E-06 |
| BRPF3     | 1,496435 | 1,53E-06 |
| F12       | 1,479671 | 1,54E-06 |
| PELI1     | -2,82871 | 1,56E-06 |
| CTXN1     | 1,608207 | 1,58E-06 |
| ACBD7     | 2,62327  | 1,62E-06 |
| SHANK3    | -2,08262 | 1,62E-06 |
| AARS2     | 1,665331 | 1,62E-06 |
| SMARCA2   | 1,897539 | 1,62E-06 |
| ZNF282    | 1,703791 | 1,65E-06 |

|           |          |          |
|-----------|----------|----------|
| ALDH4A1   | 2,789989 | 1,66E-06 |
| EFNB1     | -1,92207 | 1,66E-06 |
| CYTH4     | -9,02969 | 1,67E-06 |
| BASP1     | 8,921334 | 1,70E-06 |
| CHST2     | -8,91119 | 1,70E-06 |
| TUBGCP3   | -1,52776 | 1,72E-06 |
| MYO1E     | -2,22548 | 1,73E-06 |
| RINL      | -2,32194 | 1,74E-06 |
| ELMOD1    | -4,50527 | 1,74E-06 |
| PLCG2     | -1,73128 | 1,75E-06 |
| BHLHA15   | -3,54454 | 1,76E-06 |
| TMBIM4    | 1,930866 | 1,77E-06 |
| KAZN      | -1,83738 | 1,81E-06 |
| ANKRD29   | -3,8866  | 1,81E-06 |
| RAMP1     | -2,62425 | 1,81E-06 |
| POLR2J3   | 2,601126 | 1,82E-06 |
| MCTP1     | 3,660848 | 1,82E-06 |
| INSR      | -2,07757 | 1,85E-06 |
| UBE2W     | -1,60383 | 1,85E-06 |
| ACOT7     | -1,6865  | 1,87E-06 |
| CCDC68    | -3,79829 | 1,88E-06 |
| SLC2A10   | 8,010824 | 1,88E-06 |
| COBL      | -1,79315 | 1,88E-06 |
| DECR1     | 1,614877 | 1,90E-06 |
| MALL      | -8,74137 | 1,90E-06 |
| ZEB1      | -4,19026 | 1,92E-06 |
| SLC9A4    | 8,22982  | 1,93E-06 |
| IFITM1    | 3,899939 | 1,94E-06 |
| SOS2      | 1,953883 | 1,95E-06 |
| CTPS2     | 1,614984 | 1,96E-06 |
| LINC00491 | -8,88698 | 1,96E-06 |
| CACNA1B   | -4,66408 | 1,98E-06 |
| GMPR      | -2,85668 | 2,01E-06 |
| FZD2      | 2,098541 | 2,04E-06 |
| C14orf80  | 1,655637 | 2,04E-06 |
| ZNF827    | -2,2203  | 2,07E-06 |
| CPE       | -2,31209 | 2,09E-06 |
| PSEN1     | 1,513561 | 2,11E-06 |
| PGM5      | 8,769142 | 2,11E-06 |
| SERINC5   | 1,9414   | 2,11E-06 |
| DBN1      | 1,332571 | 2,14E-06 |
| SHISA2    | 8,785183 | 2,15E-06 |
| DOCK5     | -1,93327 | 2,16E-06 |
| AP3S1     | -1,71031 | 2,17E-06 |
| LDLRAP1   | -1,96841 | 2,17E-06 |
| DNLZ      | 1,674277 | 2,21E-06 |
| FUNDC2    | 1,556629 | 2,25E-06 |
| BICD1     | -1,86876 | 2,25E-06 |
| ACTG2     | 6,366272 | 2,25E-06 |
| MFGE8     | -1,93706 | 2,28E-06 |

|           |          |          |
|-----------|----------|----------|
| FAM89B    | 1,633534 | 2,29E-06 |
| KRIT1     | 1,564076 | 2,29E-06 |
| ITGB4     | -1,39594 | 2,31E-06 |
| FAM222A   | 1,75391  | 2,31E-06 |
| LYST      | -2,82665 | 2,34E-06 |
| SLC41A1   | -1,79165 | 2,38E-06 |
| KSR2      | -2,38236 | 2,40E-06 |
| HTR2C     | 8,692065 | 2,41E-06 |
| RNF150    | 8,704324 | 2,44E-06 |
| IL20RB    | -4,49197 | 2,53E-06 |
| SF3B4     | 1,305137 | 2,54E-06 |
| SLC15A1   | -9,02814 | 2,54E-06 |
| BCKDHA    | 1,739045 | 2,55E-06 |
| OSR1      | -8,21656 | 2,56E-06 |
| PCDHB4    | 8,887223 | 2,60E-06 |
| SCUBE1    | -8,8344  | 2,60E-06 |
| CEP112    | -2,97305 | 2,61E-06 |
| ASNA1     | 1,338255 | 2,63E-06 |
| SPOP      | -1,6187  | 2,68E-06 |
| LINC00858 | 8,780598 | 2,80E-06 |
| CNNM1     | 8,656769 | 2,82E-06 |
| CHRNA7    | -3,46446 | 2,83E-06 |
| OBSL1     | 2,045983 | 2,84E-06 |
| ENO2      | -2,28422 | 2,86E-06 |
| USP53     | -1,88709 | 2,86E-06 |
| COPS6     | 1,334021 | 2,94E-06 |
| CXCL2     | -9,43556 | 2,94E-06 |
| PCDHA5    | 8,654106 | 2,96E-06 |
| GSAP      | 6,007495 | 2,97E-06 |
| C11orf54  | -2,15989 | 2,98E-06 |
| LINC00152 | -3,2161  | 3,00E-06 |
| NAV1      | -2,40565 | 3,00E-06 |
| MAOA      | -4,75771 | 3,00E-06 |
| RASGRF1   | 2,554569 | 3,02E-06 |
| SEMA3F    | 1,713493 | 3,05E-06 |
| UCA1      | -9,19119 | 3,09E-06 |
| ADGRG6    | -1,75112 | 3,09E-06 |
| OAT       | -2,36418 | 3,10E-06 |
| TMEM163   | 8,686476 | 3,11E-06 |
| FAM102B   | 1,53318  | 3,14E-06 |
| GSE1      | 1,389334 | 3,14E-06 |
| S100A13   | 1,66505  | 3,16E-06 |
| PPP3CA    | -1,61483 | 3,17E-06 |
| GATA2-AS1 | -8,19409 | 3,19E-06 |
| MCOLN3    | -5,07157 | 3,23E-06 |
| TUBGCP2   | 1,389458 | 3,25E-06 |
| TLE6      | -6,88173 | 3,25E-06 |
| SLC35B2   | 1,681533 | 3,28E-06 |
| PROSER1   | 1,362871 | 3,33E-06 |
| C1QTNF1   | -5,44116 | 3,35E-06 |

|          |          |          |
|----------|----------|----------|
| GLDC     | -2,61321 | 3,45E-06 |
| NHSL1    | -1,88585 | 3,48E-06 |
| FURIN    | -1,69132 | 3,49E-06 |
| SLC2A4RG | 1,51454  | 3,51E-06 |
| TLCD1    | 1,817714 | 3,51E-06 |
| CHMP1B   | 1,534021 | 3,54E-06 |
| ZNF804A  | -8,86825 | 3,54E-06 |
| GAS6-AS1 | -4,68525 | 3,54E-06 |
| EML2     | -1,762   | 3,58E-06 |
| KRT80    | 3,113603 | 3,63E-06 |
| HOXC-AS3 | 6,616748 | 3,67E-06 |
| LBR      | -1,79401 | 3,69E-06 |
| AMZ1     | 8,707235 | 3,71E-06 |
| EIF4EBP2 | 1,782781 | 3,78E-06 |
| PIAS3    | 1,517865 | 3,80E-06 |
| SALL4    | 3,198808 | 3,83E-06 |
| PPM1E    | 9,148739 | 3,84E-06 |
| CRABP1   | 8,765796 | 3,85E-06 |
| KATNAL2  | 3,677577 | 3,88E-06 |
| SLC47A1  | 7,892261 | 3,90E-06 |
| MAFIP    | 2,283877 | 3,95E-06 |
| PDXP     | -1,51433 | 3,95E-06 |
| TAGLN2   | 1,604652 | 3,96E-06 |
| MARCH1   | 6,67208  | 3,96E-06 |
| AEBP1    | 8,651378 | 3,96E-06 |
| MRAS     | -2,05583 | 3,97E-06 |
| MCCC1    | 1,776943 | 3,97E-06 |
| EDA2R    | 7,956292 | 3,98E-06 |
| RAC3     | -1,66158 | 3,98E-06 |
| ARFGAP2  | 1,438499 | 4,00E-06 |
| GBAP1    | 2,487141 | 4,05E-06 |
| PDZD7    | -3,58458 | 4,15E-06 |
| TJP3     | 2,283568 | 4,26E-06 |
| FHDC1    | 2,673241 | 4,36E-06 |
| ITFG2    | 2,3151   | 4,38E-06 |
| SLC38A6  | 3,108874 | 4,49E-06 |
| H2AFJ    | 2,340529 | 4,51E-06 |
| FBXO31   | 1,411238 | 4,65E-06 |
| TUBE1    | -2,38096 | 4,69E-06 |
| ASAH2    | 3,057955 | 4,70E-06 |
| CBX5     | 2,197094 | 4,71E-06 |
| STUB1    | 1,388227 | 4,75E-06 |
| LPCAT4   | -2,21232 | 4,76E-06 |
| SLC44A2  | 1,385557 | 4,83E-06 |
| TPTE     | 8,573038 | 4,83E-06 |
| PGBD5    | 5,649867 | 4,85E-06 |
| TCF7L1   | -1,93949 | 4,88E-06 |
| HBA1     | 5,48991  | 4,93E-06 |
| CHUK     | -1,57485 | 5,00E-06 |
| C17orf58 | -2,01668 | 5,00E-06 |



|            |          |          |
|------------|----------|----------|
| ADAMTS19   | 8,54891  | 5,00E-06 |
| MTCL1      | -2,04216 | 5,03E-06 |
| WNT3A      | -6,6349  | 5,08E-06 |
| PI4KB      | 1,499853 | 5,08E-06 |
| COMMD7     | 1,641913 | 5,09E-06 |
| PYCR1      | 1,635283 | 5,17E-06 |
| ZNF32      | 1,871537 | 5,21E-06 |
| CABLES1    | 1,992999 | 5,21E-06 |
| OAS1       | 6,233914 | 5,39E-06 |
| HOXD8      | -3,6337  | 5,44E-06 |
| FGFBP1     | -8,81414 | 5,44E-06 |
| ALKBH4     | 1,702681 | 5,54E-06 |
| PXK        | -2,8654  | 5,55E-06 |
| RASSF8     | 2,033504 | 5,60E-06 |
| ZNF10      | 8,52212  | 5,60E-06 |
| CASC9      | 2,861135 | 5,67E-06 |
| NOCT       | -1,76166 | 5,67E-06 |
| MAN2B1     | 1,521365 | 5,73E-06 |
| PLXNB3     | 2,225389 | 5,74E-06 |
| SMAD6      | 2,823018 | 5,77E-06 |
| LRRC37A3   | 2,692554 | 5,79E-06 |
| CD8A       | 3,701627 | 5,81E-06 |
| LRRN1      | 6,557419 | 5,81E-06 |
| LMBRD2     | 3,333561 | 5,85E-06 |
| TAF6       | 1,374451 | 5,94E-06 |
| ZBTB18     | -4,17612 | 6,04E-06 |
| CENPV      | -2,55815 | 6,16E-06 |
| CBARP      | -2,26687 | 6,17E-06 |
| RCBTB1     | -1,66115 | 6,25E-06 |
| PRICKLE2-A | 8,516266 | 6,25E-06 |
| LOC644915  | 8,561049 | 6,27E-06 |
| NHLRC1     | 8,664189 | 6,27E-06 |
| LINC01132  | 8,735969 | 6,30E-06 |
| GRIK3      | 8,727538 | 6,34E-06 |
| LRCH4      | 1,442354 | 6,54E-06 |
| ATAD3B     | -2,27975 | 6,57E-06 |
| BMP1       | -1,60122 | 6,68E-06 |
| ARHGAP26   | -2,75068 | 6,70E-06 |
| RRAS2      | -1,673   | 6,73E-06 |
| NUPR1      | 6,177079 | 6,76E-06 |
| SARM1      | 3,675925 | 6,81E-06 |
| FITM2      | 2,03763  | 6,81E-06 |
| MB21D1     | 8,501188 | 6,82E-06 |
| BANK1      | -8,00947 | 6,94E-06 |
| PORCN      | -2,30748 | 6,96E-06 |
| ANTXR2     | -4,48999 | 6,98E-06 |
| DYNC2H1    | 2,298876 | 6,98E-06 |
| KCNN2      | 8,477195 | 7,06E-06 |
| NEK11      | 2,836691 | 7,08E-06 |
| PCDHA13    | 8,48192  | 7,08E-06 |

|           |          |          |
|-----------|----------|----------|
| ADAMTS9   | 8,767127 | 7,18E-06 |
| GATA2     | -2,3761  | 7,29E-06 |
| TMEM74B   | -8,01986 | 7,40E-06 |
| SRPK2     | 1,492042 | 7,42E-06 |
| APP       | -1,26073 | 7,43E-06 |
| SNORD25   | -3,55195 | 7,50E-06 |
| KCNV1     | 8,626659 | 7,58E-06 |
| NSDHL     | 1,435904 | 7,67E-06 |
| SNAI2     | -8,8722  | 7,75E-06 |
| IFT22     | 1,771363 | 7,85E-06 |
| PCSK9     | -2,79942 | 7,90E-06 |
| ATXN1L    | 1,558516 | 7,91E-06 |
| FRS2      | 1,870783 | 7,95E-06 |
| RILPL2    | -2,73865 | 8,01E-06 |
| TENM1     | 8,523561 | 8,07E-06 |
| CDC25B    | 1,401324 | 8,11E-06 |
| FGFRL1    | -1,42863 | 8,12E-06 |
| PRTG      | 8,445683 | 8,33E-06 |
| NDST1     | 1,904488 | 8,46E-06 |
| IFNLR1    | -2,3979  | 8,47E-06 |
| TMEM206   | -2,1491  | 8,49E-06 |
| MYBL2     | 1,271319 | 8,58E-06 |
| ELOVL4    | 8,577448 | 8,63E-06 |
| C4orf19   | 8,458651 | 8,69E-06 |
| COX5B     | 1,272279 | 8,70E-06 |
| SLC18B1   | -1,8234  | 8,71E-06 |
| DNAJC24   | -1,95621 | 8,75E-06 |
| PBX1      | 2,666949 | 8,83E-06 |
| SIKE1     | 1,335795 | 8,87E-06 |
| PIM2      | -1,75776 | 8,92E-06 |
| PMVK      | 1,834344 | 9,04E-06 |
| RHOB      | 1,507428 | 9,04E-06 |
| PDX1      | -8,60277 | 9,10E-06 |
| CBX7      | -3,14221 | 9,15E-06 |
| ECH1      | 1,501929 | 9,16E-06 |
| F2R       | -1,72413 | 9,16E-06 |
| MTA2      | 1,252611 | 9,29E-06 |
| ZNF212    | 1,855906 | 9,29E-06 |
| GABARAPL  | -3,64775 | 9,36E-06 |
| RIT1      | 2,310416 | 9,40E-06 |
| CCDC83    | 8,479962 | 9,46E-06 |
| MICAL1    | -2,15841 | 9,56E-06 |
| WISP2     | 9,043356 | 9,56E-06 |
| DSCAM     | 8,543961 | 9,62E-06 |
| SP100     | -3,77314 | 9,71E-06 |
| CRIM1     | -2,32449 | 9,79E-06 |
| FBXW4     | 1,792166 | 9,83E-06 |
| HDAC4     | -2,94275 | 9,95E-06 |
| LINC01138 | -6,55047 | 9,95E-06 |
| IL15RA    | -2,83076 | 1,00E-05 |

|           |          |          |
|-----------|----------|----------|
| SSR2      | 1,468823 | 1,00E-05 |
| SH3YL1    | 1,591226 | 1,01E-05 |
| MRPL41    | 1,388165 | 1,02E-05 |
| TMEM191   | 2,244144 | 1,02E-05 |
| ELFN1     | -3,32746 | 1,02E-05 |
| IMPA2     | 1,515734 | 1,03E-05 |
| ARNTL     | -2,55442 | 1,03E-05 |
| ABHD8     | -3,75934 | 1,03E-05 |
| COA3      | 1,864689 | 1,04E-05 |
| CDKN2C    | 1,913765 | 1,06E-05 |
| EPHB4     | 1,610479 | 1,07E-05 |
| DACH1     | 8,390247 | 1,08E-05 |
| INPP4B    | 1,959051 | 1,08E-05 |
| MPPED2    | 8,585285 | 1,09E-05 |
| CHST7     | -2,7037  | 1,09E-05 |
| LINC00664 | 8,499531 | 1,09E-05 |
| AP1S1     | 2,023872 | 1,09E-05 |
| COL5A1    | 7,73084  | 1,09E-05 |
| MCCC2     | 1,509625 | 1,10E-05 |
| AMIGO1    | 7,585775 | 1,11E-05 |
| ZNF443    | 2,273701 | 1,11E-05 |
| AREG      | -5,38531 | 1,12E-05 |
| CCDC82    | -2,45203 | 1,14E-05 |
| ROBO3     | -2,85107 | 1,14E-05 |
| EXTL3     | -1,57311 | 1,14E-05 |
| LOC102724 | -8,887   | 1,15E-05 |
| MEGF11    | -5,44611 | 1,15E-05 |
| C2orf88   | -7,86852 | 1,15E-05 |
| IRAK1     | 1,290983 | 1,15E-05 |
| LOC728735 | 8,393262 | 1,16E-05 |
| TAF11     | 1,607644 | 1,17E-05 |
| FNTA      | -1,49621 | 1,18E-05 |
| LANCL3    | -8,54322 | 1,19E-05 |
| SMARCA4   | 1,575913 | 1,19E-05 |
| ZNF107    | 1,64141  | 1,19E-05 |
| FAM63B    | -2,7185  | 1,20E-05 |
| WRAP73    | -1,96632 | 1,20E-05 |
| FOXD1     | -3,37404 | 1,20E-05 |
| MT2A      | -2,50931 | 1,20E-05 |
| PLA2G4A   | -4,32246 | 1,21E-05 |
| DUSP16    | 1,641096 | 1,21E-05 |
| FKBP1B    | -3,22683 | 1,22E-05 |
| HLA-H     | -6,49322 | 1,22E-05 |
| FMO5      | 8,363107 | 1,24E-05 |
| LRRFIP1   | -1,27487 | 1,24E-05 |
| CSRNP1    | -2,7327  | 1,25E-05 |
| PRDM16    | -3,02287 | 1,28E-05 |
| CDK6      | -3,07552 | 1,28E-05 |
| FXD1      | -5,42851 | 1,30E-05 |
| EFNA2     | -2,17101 | 1,31E-05 |

|           |          |          |
|-----------|----------|----------|
| SLC39A1   | 1,788782 | 1,33E-05 |
| CRLF1     | -2,26578 | 1,34E-05 |
| PLA2G3    | 8,623793 | 1,34E-05 |
| STMN3     | -1,42731 | 1,35E-05 |
| LTK       | -7,83331 | 1,35E-05 |
| TPST1     | -2,1895  | 1,36E-05 |
| UPK1A-AS1 | -6,62941 | 1,37E-05 |
| LOC728554 | 1,979647 | 1,37E-05 |
| S100P     | 5,771672 | 1,37E-05 |
| SEPHS1    | 1,483667 | 1,37E-05 |
| CYP4F11   | -2,2902  | 1,38E-05 |
| C1RL-AS1  | -8,53559 | 1,39E-05 |
| MT1X      | -2,28556 | 1,40E-05 |
| BLACAT1   | -4,35168 | 1,40E-05 |
| LOC374443 | 4,377092 | 1,41E-05 |
| DUSP6     | -7,85393 | 1,41E-05 |
| DNASE2    | 1,649504 | 1,41E-05 |
| GFI1      | -4,37885 | 1,41E-05 |
| EPS15     | -1,46542 | 1,42E-05 |
| INAFM2    | -2,23211 | 1,42E-05 |
| ZIC4      | 8,335446 | 1,42E-05 |
| LOC90768  | 8,355633 | 1,42E-05 |
| NPR2      | -7,99235 | 1,43E-05 |
| NUMA1     | 1,251075 | 1,43E-05 |
| TRIM56    | 1,72109  | 1,45E-05 |
| PRDM1     | -6,48424 | 1,46E-05 |
| STAT4     | -6,69513 | 1,46E-05 |
| EFR3A     | -1,71022 | 1,47E-05 |
| NIPSNAP3A | 2,318927 | 1,48E-05 |
| NAB1      | -1,88504 | 1,48E-05 |
| TLR3      | -8,59153 | 1,48E-05 |
| SRGAP2D   | -2,35094 | 1,49E-05 |
| MICAL2    | -1,94599 | 1,49E-05 |
| DPP3      | 1,552689 | 1,50E-05 |
| PDZRN3    | 8,32228  | 1,51E-05 |
| MYL12B    | 1,279992 | 1,51E-05 |
| NCMAP     | -8,49292 | 1,52E-05 |
| MAP10     | 8,379677 | 1,52E-05 |
| ARSD      | 1,989769 | 1,52E-05 |
| STEAP2    | -8,3324  | 1,53E-05 |
| PQLC1     | -1,4845  | 1,53E-05 |
| RPP40     | 1,624519 | 1,54E-05 |
| WDR83     | 1,669967 | 1,55E-05 |
| BMP8B     | -2,20983 | 1,56E-05 |
| PCLO      | 2,272117 | 1,56E-05 |
| ROGDI     | 1,947309 | 1,57E-05 |
| CRYM      | -7,9214  | 1,57E-05 |
| RHOV      | 2,206321 | 1,57E-05 |
| SNRNP48   | -1,36988 | 1,58E-05 |
| ANKDD1A   | -4,42063 | 1,60E-05 |

|           |          |          |
|-----------|----------|----------|
| MPP5      | 1,474774 | 1,62E-05 |
| HNRNPAB   | 1,20613  | 1,62E-05 |
| C7orf31   | -8,62723 | 1,62E-05 |
| HMGN1     | 1,245043 | 1,65E-05 |
| PGLS      | 1,493785 | 1,66E-05 |
| AQP3      | 3,435858 | 1,68E-05 |
| NPDC1     | 1,334511 | 1,69E-05 |
| RAB3D     | 1,941058 | 1,69E-05 |
| MMD       | -2,23207 | 1,73E-05 |
| RRAGD     | -2,04482 | 1,73E-05 |
| IFI44L    | 8,830638 | 1,73E-05 |
| SH2D3A    | -1,89923 | 1,75E-05 |
| VPS72     | 1,676568 | 1,77E-05 |
| ATP5G2    | 1,274874 | 1,78E-05 |
| FBXO15    | 5,584093 | 1,80E-05 |
| KARS      | 1,248558 | 1,81E-05 |
| DMTN      | -1,51472 | 1,81E-05 |
| CDON      | -2,46998 | 1,81E-05 |
| ABLM1     | -1,78569 | 1,82E-05 |
| FRAT1     | 8,282728 | 1,84E-05 |
| LTBP4     | -1,47128 | 1,85E-05 |
| KLHL15    | -2,03968 | 1,85E-05 |
| DNAAF3    | -1,38288 | 1,86E-05 |
| LOC10013C | -8,47982 | 1,86E-05 |
| SYT7      | 1,282051 | 1,88E-05 |
| GLRX      | -3,79997 | 1,88E-05 |
| IRAK2     | -4,9108  | 1,88E-05 |
| SETDB1    | 1,607248 | 1,92E-05 |
| PPP1R9B   | -1,45414 | 1,92E-05 |
| QPCT      | 8,344938 | 1,97E-05 |
| HID1      | 1,955926 | 2,02E-05 |
| DNM3      | -4,37019 | 2,03E-05 |
| RPP25     | 1,632911 | 2,05E-05 |
| GSR       | -1,51095 | 2,09E-05 |
| RPL17     | 1,576593 | 2,10E-05 |
| PITX3     | -5,39574 | 2,10E-05 |
| CCNG2     | 2,226827 | 2,10E-05 |
| ABHD16A   | 1,441088 | 2,11E-05 |
| MLYCD     | 1,815852 | 2,13E-05 |
| EEPD1     | -3,13046 | 2,13E-05 |
| CNOT2     | 1,264966 | 2,14E-05 |
| COL4A4    | -3,22265 | 2,14E-05 |
| ZNF701    | 1,853952 | 2,15E-05 |
| HIP1R     | -1,34167 | 2,15E-05 |
| WDR73     | 1,549156 | 2,16E-05 |
| RECQL4    | -1,47208 | 2,17E-05 |
| AGR2      | 8,683433 | 2,18E-05 |
| ATG16L1   | -1,40178 | 2,19E-05 |
| RASL10B   | 8,260485 | 2,22E-05 |
| TNFRSF10C | -8,47286 | 2,23E-05 |

|          |          |          |
|----------|----------|----------|
| JAZF1    | -3,71489 | 2,27E-05 |
| LYNX1    | -8,42598 | 2,28E-05 |
| PTGS1    | -4,55863 | 2,28E-05 |
| TNPO2    | 1,735335 | 2,28E-05 |
| CDCA3    | 1,469299 | 2,31E-05 |
| KIAA1522 | 1,268727 | 2,31E-05 |
| TMOD1    | -2,82903 | 2,33E-05 |
| GADD45A  | -2,50411 | 2,33E-05 |
| SAP130   | 1,261294 | 2,35E-05 |
| HIPK2    | -1,76703 | 2,35E-05 |
| DVL1     | -1,38883 | 2,36E-05 |
| FES      | -2,39117 | 2,36E-05 |
| KRTAP3-1 | 4,625566 | 2,36E-05 |
| SFMBT2   | 7,508127 | 2,37E-05 |
| DACT3    | -4,32259 | 2,38E-05 |
| RASSF6   | -6,06146 | 2,41E-05 |
| SMARCD3  | -1,81647 | 2,41E-05 |
| SLFN11   | 8,251655 | 2,41E-05 |
| BATF3    | -7,94342 | 2,43E-05 |
| PIK3C2B  | 1,504952 | 2,44E-05 |
| SLC22A31 | -2,10622 | 2,45E-05 |
| TET3     | 1,807276 | 2,45E-05 |
| TTC29    | 8,227696 | 2,45E-05 |
| KREMEN1  | -1,3469  | 2,45E-05 |
| PROCA1   | 6,153812 | 2,47E-05 |
| APOBEC3F | -2,32845 | 2,48E-05 |
| NKX2-8   | -5,34666 | 2,49E-05 |
| DIS3     | -1,35342 | 2,50E-05 |
| ZNF704   | 2,010345 | 2,50E-05 |
| P4HA1    | -1,8412  | 2,50E-05 |
| BMF      | 4,452336 | 2,53E-05 |
| CTSB     | -1,66977 | 2,53E-05 |
| FLOT2    | 1,902127 | 2,54E-05 |
| MIER1    | -1,42405 | 2,56E-05 |
| TXNDC9   | 1,617286 | 2,59E-05 |
| NEIL2    | -2,04486 | 2,59E-05 |
| TERF2    | -1,81242 | 2,59E-05 |
| DSG2     | -1,31517 | 2,59E-05 |
| ERO1A    | -1,38737 | 2,60E-05 |
| PYCR2    | -1,76508 | 2,60E-05 |
| TMEM183F | 2,07472  | 2,60E-05 |
| B3GALT4  | 5,246618 | 2,61E-05 |
| INHA     | 8,934155 | 2,62E-05 |
| MEF2C    | -2,51648 | 2,63E-05 |
| PRKCI    | 1,296766 | 2,64E-05 |
| MRPL28   | 1,486248 | 2,65E-05 |
| RBFOX2   | -1,43746 | 2,65E-05 |
| ADGRB2   | -2,35917 | 2,67E-05 |
| ST3GAL6  | -7,68623 | 2,68E-05 |
| TAMM41   | 1,545064 | 2,68E-05 |

|           |          |          |
|-----------|----------|----------|
| KLF3      | -1,62176 | 2,69E-05 |
| CDH1      | 1,803905 | 2,70E-05 |
| TNFRSF18  | -2,90639 | 2,73E-05 |
| RFTN2     | 8,282502 | 2,73E-05 |
| ZNF354A   | 1,851628 | 2,73E-05 |
| ABCB4     | 8,427931 | 2,80E-05 |
| ARMCX1    | 8,287873 | 2,81E-05 |
| SLC16A9   | -1,93218 | 2,81E-05 |
| CASZ1     | 2,045663 | 2,85E-05 |
| RAI14     | -1,49119 | 2,86E-05 |
| VPS52     | 1,24686  | 2,87E-05 |
| RASSF10   | 7,431332 | 2,88E-05 |
| TMEM170F  | 2,868578 | 2,89E-05 |
| EIF2AK4   | -1,70419 | 2,89E-05 |
| ZKSCAN5   | 1,426027 | 2,90E-05 |
| ZCWPW1    | 2,644004 | 2,91E-05 |
| UBL3      | 1,561985 | 2,92E-05 |
| LGALS3BP  | -2,7812  | 2,93E-05 |
| NMUR2     | 8,184898 | 2,94E-05 |
| TRAPPC2L  | 1,289844 | 2,96E-05 |
| DHFRL1    | 2,087313 | 2,98E-05 |
| TMEM168   | 1,439124 | 3,00E-05 |
| C4orf32   | -2,18425 | 3,04E-05 |
| GAB1      | 2,108222 | 3,04E-05 |
| TMEM181   | -1,53484 | 3,05E-05 |
| EXD2      | 1,394025 | 3,06E-05 |
| IFIT5     | -2,22518 | 3,08E-05 |
| RPRM      | 5,322835 | 3,09E-05 |
| GALNT2    | -1,38908 | 3,11E-05 |
| USP16     | -1,35054 | 3,13E-05 |
| LOC403323 | -7,6331  | 3,17E-05 |
| FCGR1A    | 7,60662  | 3,17E-05 |
| BEX2      | -2,5006  | 3,18E-05 |
| ZYX       | -1,6074  | 3,24E-05 |
| RAI2      | 8,24684  | 3,24E-05 |
| PRADC1    | 2,168977 | 3,25E-05 |
| RAB27A    | 2,042766 | 3,26E-05 |
| RYR1      | -4,84391 | 3,26E-05 |
| ADAM21    | -8,44711 | 3,32E-05 |
| SNRPE     | 1,251715 | 3,34E-05 |
| ABCC4     | -1,63847 | 3,38E-05 |
| RNF126    | -1,51337 | 3,38E-05 |
| S100A10   | 1,443627 | 3,40E-05 |
| FBXW9     | 1,651992 | 3,40E-05 |
| SFN       | -1,52685 | 3,41E-05 |
| TBC1D7    | 1,750189 | 3,41E-05 |
| BHMG1     | -6,48116 | 3,44E-05 |
| PLOD3     | 1,260989 | 3,46E-05 |
| TPPP      | -2,45894 | 3,48E-05 |
| HSPA1A    | 7,121308 | 3,49E-05 |

|           |          |          |
|-----------|----------|----------|
| ZNF563    | 8,139161 | 3,61E-05 |
| AP3B2     | 4,1582   | 3,61E-05 |
| LLPH-AS1  | 8,138617 | 3,62E-05 |
| IL6R      | -3,24449 | 3,68E-05 |
| RARA-AS1  | -8,79029 | 3,70E-05 |
| TTC7B     | -1,40316 | 3,73E-05 |
| ZNF398    | 1,292258 | 3,73E-05 |
| GALNT3    | 2,101619 | 3,80E-05 |
| LINC01604 | -2,77886 | 3,82E-05 |
| PHTF1     | 2,138363 | 3,85E-05 |
| CDH15     | -3,46231 | 3,91E-05 |
| GSDMD     | -2,27672 | 3,99E-05 |
| WBSCR16   | 1,27295  | 4,00E-05 |
| ZNF33A    | 1,345396 | 4,02E-05 |
| HEATR1    | -1,32849 | 4,03E-05 |
| GATA5     | 8,133711 | 4,03E-05 |
| MTG1      | 1,800333 | 4,05E-05 |
| ABCA12    | 2,375515 | 4,05E-05 |
| RBM47     | 1,552048 | 4,05E-05 |
| STARD8    | -2,61521 | 4,08E-05 |
| ZNRF1     | 1,258661 | 4,08E-05 |
| PSMA1     | -1,2306  | 4,09E-05 |
| C9orf72   | -3,45692 | 4,13E-05 |
| NIPA1     | -1,35756 | 4,16E-05 |
| WASF3     | 2,345619 | 4,20E-05 |
| RFWD2     | 1,287583 | 4,22E-05 |
| KIF5A     | -3,2283  | 4,25E-05 |
| BCYRN1    | 1,286497 | 4,29E-05 |
| FAH       | 1,50828  | 4,31E-05 |
| ZNF610    | 8,10402  | 4,33E-05 |
| LIPH      | -3,21673 | 4,35E-05 |
| ZNF577    | -8,28258 | 4,39E-05 |
| ABCG4     | -4,67872 | 4,40E-05 |
| PHLDA1    | -2,40259 | 4,40E-05 |
| HTRA1     | 8,225693 | 4,40E-05 |
| MTRF1L    | -1,42816 | 4,42E-05 |
| BAG4      | -1,36775 | 4,42E-05 |
| NRP1      | 1,976479 | 4,43E-05 |
| PVR       | -1,88715 | 4,44E-05 |
| LOC100128 | 8,094733 | 4,46E-05 |
| ABHD3     | -1,79293 | 4,52E-05 |
| S1PR2     | -1,74047 | 4,52E-05 |
| RIPPLY3   | 8,101789 | 4,53E-05 |
| SDCBP     | -1,60978 | 4,55E-05 |
| C17orf97  | 2,23137  | 4,56E-05 |
| MPZ       | -4,80687 | 4,58E-05 |
| CYB5A     | 1,607658 | 4,60E-05 |
| SMG7      | 1,152245 | 4,63E-05 |
| SCAMP5    | 2,102751 | 4,64E-05 |
| PSAT1     | -2,23387 | 4,66E-05 |



|           |          |          |
|-----------|----------|----------|
| GATS      | 2,940858 | 4,70E-05 |
| PRKCE     | -2,47592 | 4,74E-05 |
| RAB13     | 1,439478 | 4,77E-05 |
| PGF       | -3,39538 | 4,78E-05 |
| CHORDC1   | -1,87752 | 4,80E-05 |
| LPPR4     | -8,29102 | 4,80E-05 |
| TSPAN7    | -8,26893 | 4,81E-05 |
| RHBDL3    | -3,22355 | 4,82E-05 |
| ANKRD22   | -5,25539 | 4,82E-05 |
| SLC6A14   | 8,088205 | 4,84E-05 |
| FAF1      | -1,81853 | 4,84E-05 |
| ARID4A    | 1,892755 | 4,93E-05 |
| RASA3     | -1,62142 | 4,95E-05 |
| CNTNAP3P  | -8,30356 | 5,01E-05 |
| FLCN      | 1,438878 | 5,04E-05 |
| LOC10013C | -3,98417 | 5,06E-05 |
| CACNA1G   | -8,27772 | 5,06E-05 |
| MROH6     | -1,52152 | 5,08E-05 |
| DDA1      | -1,30586 | 5,15E-05 |
| BTN3A2    | -3,12258 | 5,16E-05 |
| EMC1      | -1,18358 | 5,17E-05 |
| F10       | -8,2479  | 5,18E-05 |
| SPG21     | 1,217641 | 5,19E-05 |
| LHFPL2    | -1,37121 | 5,21E-05 |
| TAP2      | -1,5323  | 5,23E-05 |
| THEMIS2   | -2,77676 | 5,27E-05 |
| LPAR2     | 1,3085   | 5,30E-05 |
| THEM6     | 1,529811 | 5,30E-05 |
| HDHD2     | 1,682381 | 5,35E-05 |
| DBI       | 1,188065 | 5,36E-05 |
| MYO10     | -1,28324 | 5,37E-05 |
| CST6      | -8,28635 | 5,38E-05 |
| GUCY1B3   | 8,092151 | 5,38E-05 |
| SERPINE1  | -6,68751 | 5,38E-05 |
| PPFIBP2   | 2,194084 | 5,42E-05 |
| SNX25     | -1,95852 | 5,42E-05 |
| ASB8      | 1,791802 | 5,46E-05 |
| PARD6G    | -1,89712 | 5,49E-05 |
| NLRP1     | -7,57349 | 5,58E-05 |
| FHOD3     | -3,16836 | 5,60E-05 |
| CETN2     | 1,495013 | 5,62E-05 |
| TRIM45    | 2,853589 | 5,64E-05 |
| CITED1    | -4,07503 | 5,69E-05 |
| RHOF      | -1,40081 | 5,73E-05 |
| FRMD6-AS: | 4,565219 | 5,76E-05 |
| SLC16A1   | -1,28021 | 5,78E-05 |
| USP51     | 8,116321 | 5,80E-05 |
| PGK1      | -1,17705 | 5,82E-05 |
| ARHGEF40  | -2,94532 | 5,84E-05 |
| KCNQ5     | 8,15685  | 5,86E-05 |

|           |          |          |
|-----------|----------|----------|
| PCDHB10   | 5,527581 | 5,94E-05 |
| BMPR2     | 1,629598 | 5,95E-05 |
| PVALB     | 8,188867 | 5,96E-05 |
| CYP4V2    | -2,96516 | 5,99E-05 |
| EIF1AY    | -8,21588 | 6,02E-05 |
| KCNMA1    | 5,420729 | 6,03E-05 |
| ZNF786    | 1,467551 | 6,04E-05 |
| LINC01123 | -1,88763 | 6,04E-05 |
| PRTN3     | -8,34786 | 6,04E-05 |
| BVES      | -8,32809 | 6,04E-05 |
| SNCAIP    | 4,265904 | 6,08E-05 |
| AKT2      | 1,322302 | 6,12E-05 |
| RLF       | -1,32101 | 6,12E-05 |
| SH3GL3    | 4,305255 | 6,12E-05 |
| SH3BP1    | -1,83681 | 6,14E-05 |
| LINC00649 | 8,027765 | 6,14E-05 |
| PCDH9     | 8,119576 | 6,15E-05 |
| CCDC149   | 1,854708 | 6,15E-05 |
| EPG5      | 1,975417 | 6,16E-05 |
| BCCIP     | -1,18315 | 6,18E-05 |
| SLC25A29  | 1,543333 | 6,21E-05 |
| FAHD1     | 1,262798 | 6,22E-05 |
| MYH7B     | 5,384963 | 6,22E-05 |
| TGDS      | -2,19869 | 6,22E-05 |
| B4GAT1    | 2,232005 | 6,25E-05 |
| BAG2      | -1,60608 | 6,26E-05 |
| TPD52L1   | 1,680552 | 6,26E-05 |
| AP5Z1     | 1,402835 | 6,28E-05 |
| ZDHHC9    | 1,424303 | 6,33E-05 |
| LOX       | 8,032231 | 6,34E-05 |
| HIST1H2BH | 8,0307   | 6,34E-05 |
| KCNK13    | -3,69941 | 6,38E-05 |
| EDC3      | 1,375323 | 6,39E-05 |
| PAPSS2    | -3,19486 | 6,41E-05 |
| RHOT2     | 1,227298 | 6,50E-05 |
| ZNF726    | 8,175617 | 6,51E-05 |
| BGN       | 9,666876 | 6,51E-05 |
| ABCA1     | -8,19556 | 6,55E-05 |
| CSPP1     | -1,89347 | 6,57E-05 |
| ABCB6     | 1,555614 | 6,57E-05 |
| AKIRIN1   | -1,2308  | 6,57E-05 |
| GSDMB     | -3,40653 | 6,65E-05 |
| ARAP2     | -1,84395 | 6,66E-05 |
| KLF15     | -3,31359 | 6,72E-05 |
| MPDU1     | 1,351502 | 6,74E-05 |
| MORC3     | -1,58068 | 6,76E-05 |
| SIM2      | -1,99577 | 6,77E-05 |
| LAMA4     | -8,1844  | 6,79E-05 |
| MRPL10    | -1,22176 | 6,79E-05 |
| PLCE1     | -3,72203 | 6,80E-05 |

|           |          |          |
|-----------|----------|----------|
| GPRC5B    | -3,04532 | 6,82E-05 |
| B4GALNT3  | -2,43497 | 6,86E-05 |
| EGLN3     | -2,09379 | 6,87E-05 |
| TM7SF2    | 1,990882 | 6,91E-05 |
| BMP2K     | -1,41711 | 6,93E-05 |
| FAM117B   | 1,66532  | 6,96E-05 |
| LRRC61    | 1,820497 | 7,04E-05 |
| CHML      | 1,493304 | 7,07E-05 |
| S100A11   | 1,672506 | 7,08E-05 |
| DES12     | -1,26048 | 7,08E-05 |
| JOSD1     | -1,49735 | 7,10E-05 |
| IQCH-AS1  | 1,883409 | 7,15E-05 |
| LOC100506 | -4,96249 | 7,18E-05 |
| PDE4B     | -6,0886  | 7,21E-05 |
| ATP6AP1L  | -2,60687 | 7,21E-05 |
| SPNS1     | 1,410491 | 7,25E-05 |
| IFI30     | 1,603275 | 7,26E-05 |
| TNNT1     | 1,176975 | 7,26E-05 |
| BHLHE40   | -2,08858 | 7,26E-05 |
| SHFM1     | 1,176263 | 7,28E-05 |
| CAMK2N1   | -1,93411 | 7,37E-05 |
| KCNQ1OT1  | 3,300937 | 7,37E-05 |
| XPOT      | 1,361868 | 7,40E-05 |
| NEURL1B   | 1,775043 | 7,47E-05 |
| GNA11     | -1,21329 | 7,56E-05 |
| CYP39A1   | -6,05525 | 7,66E-05 |
| PEX10     | 1,351023 | 7,70E-05 |
| GDI2      | 1,178064 | 7,73E-05 |
| SLC22A11  | 8,192066 | 7,77E-05 |
| ABCD3     | -1,5865  | 7,95E-05 |
| MS4A15    | -8,24867 | 7,95E-05 |
| DNAJB4    | -2,77754 | 8,01E-05 |
| CASP4     | -4,12262 | 8,02E-05 |
| EFHC1     | 2,373475 | 8,04E-05 |
| NIPSNAP1  | 1,317142 | 8,07E-05 |
| LAMTOR2   | 1,298321 | 8,09E-05 |
| TMEM51    | -1,61842 | 8,09E-05 |
| KLHDC9    | 4,895662 | 8,21E-05 |
| RNF128    | -8,00744 | 8,24E-05 |
| KLHL17    | -2,06664 | 8,29E-05 |
| TRIP11    | 1,273608 | 8,29E-05 |
| CFAP74    | -8,31747 | 8,41E-05 |
| ITPR2     | 1,781885 | 8,43E-05 |
| DNAJC16   | -1,6117  | 8,51E-05 |
| DSTYK     | 1,818693 | 8,63E-05 |
| KBTBD8    | -2,85729 | 8,67E-05 |
| ZIC2      | -1,85022 | 8,71E-05 |
| NSD1      | 1,701283 | 8,78E-05 |
| RELL1     | -1,63134 | 8,79E-05 |
| ZNF646    | 1,31497  | 8,85E-05 |

|            |          |          |
|------------|----------|----------|
| RHBDD1     | -1,67052 | 8,87E-05 |
| RRAD       | -8,2414  | 8,93E-05 |
| CDC14B     | -1,79826 | 8,98E-05 |
| SLC27A1    | -2,10504 | 9,00E-05 |
| LEMD2      | 1,363421 | 9,00E-05 |
| TIGD6      | 1,919054 | 9,01E-05 |
| DLEU2      | -2,63755 | 9,02E-05 |
| RNPEPL1    | -1,45037 | 9,05E-05 |
| SH3TC2     | -3,59309 | 9,09E-05 |
| ZNF98      | 8,046301 | 9,13E-05 |
| CAP1       | -1,24732 | 9,19E-05 |
| RRN3P1     | -8,14287 | 9,32E-05 |
| FBXL16     | -1,61416 | 9,35E-05 |
| ZAK        | -1,26705 | 9,60E-05 |
| NIPAL2     | 1,961704 | 9,71E-05 |
| CBWD5      | -1,3339  | 9,74E-05 |
| HOXC13-AS1 | 4,39096  | 9,74E-05 |
| PAK2       | 1,196554 | 9,74E-05 |
| WRB        | 1,486874 | 9,76E-05 |
| TMEM63C    | -2,7071  | 9,82E-05 |
| GALNT5     | -12,2885 | 9,82E-05 |
| DMXL2      | 1,482909 | 9,94E-05 |
| HDDC3      | 1,490304 | 9,94E-05 |
| SEPT2      | -1,15972 | 9,95E-05 |
| NUPL1      | -1,40956 | 0,0001   |
| APOE       | 2,920654 | 0,000101 |
| NIT2       | 1,337467 | 0,000101 |
| TMPO-AS1   | 2,008284 | 0,000102 |
| CTTNBP2    | -4,29791 | 0,000102 |
| ZMAT2      | 1,222559 | 0,000103 |
| ULK1       | 1,738511 | 0,000104 |
| ZFP1       | 1,396072 | 0,000104 |
| VAMP8      | 2,021231 | 0,000104 |
| NFE2       | 2,521933 | 0,000104 |
| ADAMTS16   | -8,23002 | 0,000104 |
| MED20      | 1,488322 | 0,000104 |
| ALOXE3     | -2,76291 | 0,000105 |
| PRPS1      | -1,31073 | 0,000105 |
| LOC100996  | 3,053108 | 0,000105 |
| GPR68      | 7,922437 | 0,000105 |
| CTNNAL1    | -1,57283 | 0,000105 |
| LDLRAD3    | -1,65378 | 0,000106 |
| PART1      | 7,935652 | 0,000106 |
| CORO1B     | 1,665713 | 0,000108 |
| CDC27      | -1,13814 | 0,000108 |
| AFF3       | 7,11611  | 0,000108 |
| THBS3      | 2,375641 | 0,000108 |
| ADCY7      | -1,48065 | 0,000108 |
| PSMD7      | 1,11296  | 0,000108 |
| RPTOR      | -1,20859 | 0,000108 |

|           |          |          |
|-----------|----------|----------|
| GPATCH2   | 1,348191 | 0,000109 |
| LOC339803 | 6,171354 | 0,000109 |
| NRM       | 1,737446 | 0,000109 |
| CPM       | -3,00123 | 0,00011  |
| EXOSC9    | -1,3289  | 0,00011  |
| C15orf52  | -5,16265 | 0,00011  |
| LINC00869 | -2,78808 | 0,000111 |
| SMAD7     | 2,00805  | 0,000111 |
| DTD1      | 1,321262 | 0,000111 |
| TUBB3     | 1,093223 | 0,000112 |
| NEK9      | -6,82939 | 0,000112 |
| THUMPD3   | 2,305446 | 0,000113 |
| MPP7      | -1,209   | 0,000114 |
| CD164L2   | -3,28624 | 0,000115 |
| MTIF3     | 1,55921  | 0,000115 |
| MTSS1L    | 1,343276 | 0,000115 |
| RAB22A    | 1,259267 | 0,000116 |
| HIST1H2BK | 2,534228 | 0,000116 |
| DENND5A   | -1,55528 | 0,000116 |
| CA12      | 2,661863 | 0,000116 |
| OLFML3    | 6,449629 | 0,000116 |
| HDAC9     | -4,4118  | 0,000118 |
| CASK      | -1,24888 | 0,000119 |
| LPCAT2    | -1,87239 | 0,00012  |
| SEMA7A    | -1,62111 | 0,00012  |
| EVI5      | -1,73777 | 0,00012  |
| GTF2H3    | -1,35807 | 0,00012  |
| TOP2B     | 1,266157 | 0,000121 |
| UGT8      | -7,88682 | 0,000121 |
| LEMD1     | -8,11845 | 0,000122 |
| PPL       | 1,654963 | 0,000122 |
| TC2N      | 1,695654 | 0,000122 |
| MEF2D     | -1,53024 | 0,000122 |
| DVL3      | 1,146237 | 0,000123 |
| GJA3      | -1,67958 | 0,000123 |
| JAG2      | -1,53185 | 0,000123 |
| VPS45     | 1,29332  | 0,000123 |
| CYB5B     | -1,65187 | 0,000123 |
| ALDH3A2   | 1,149511 | 0,000123 |
| FAM196A   | 8,056727 | 0,000124 |
| GART      | -1,14181 | 0,000124 |
| PSMB3     | -1,12638 | 0,000124 |
| NT5DC3    | -1,55331 | 0,000124 |
| PPP1R3F   | 2,58774  | 0,000125 |
| GAL       | -1,15152 | 0,000125 |
| P3H2      | 2,253551 | 0,000125 |
| MIR4458H  | 7,881769 | 0,000125 |
| KHDC1L    | -8,05167 | 0,000126 |
| GRAMD1A   | -1,19886 | 0,000127 |
| KLF4      | -1,88473 | 0,000127 |

|           |          |          |
|-----------|----------|----------|
| MPG       | 1,281403 | 0,000128 |
| SDE2      | -1,82639 | 0,000128 |
| CPNE2     | -1,83563 | 0,000128 |
| SLC7A5    | 1,186324 | 0,000128 |
| SPRYD7    | -1,72902 | 0,000128 |
| SHISA4    | -2,50452 | 0,000129 |
| CAPRIN2   | -1,6739  | 0,000129 |
| MARCKS    | -1,30644 | 0,00013  |
| TMEM255E  | -4,31954 | 0,00013  |
| SH3BGRL   | -1,74742 | 0,000131 |
| TFCP2     | -8,52861 | 0,000131 |
| CSPG4     | -7,85725 | 0,000131 |
| DGKQ      | -1,61867 | 0,000132 |
| LOC100506 | -1,42337 | 0,000132 |
| SYNJ2     | -1,34469 | 0,000132 |
| DNAJC2    | 1,270546 | 0,000133 |
| GTF2IP1   | 2,107946 | 0,000133 |
| FOXI3     | 7,868964 | 0,000134 |
| KLHDC3    | 1,816488 | 0,000134 |
| PIGN      | 1,834475 | 0,000134 |
| CBLL1     | 1,242221 | 0,000134 |
| STRIP2    | -2,24242 | 0,000134 |
| TRIM10    | -8,03765 | 0,000135 |
| PIGQ      | 1,965257 | 0,000135 |
| LINC00920 | -8,03595 | 0,000135 |
| TRIL      | 7,927841 | 0,000135 |
| TUBA1B    | 1,063615 | 0,000136 |
| HDGF      | 1,140424 | 0,000136 |
| DOCK9     | -1,61875 | 0,000136 |
| OTUD7B    | 1,183674 | 0,000136 |
| SMYD3     | -1,67141 | 0,000136 |
| ZNF611    | 1,667386 | 0,000137 |
| CCDC90B   | 1,301752 | 0,000137 |
| BACE1     | 1,723937 | 0,000138 |
| ACTL6A    | 1,23359  | 0,000138 |
| KCTD15    | 1,870751 | 0,000139 |
| NBPF15    | 1,768423 | 0,000139 |
| TMEM61    | -8,09055 | 0,000139 |
| OS9       | 1,213693 | 0,000139 |
| TWISTNB   | -1,31091 | 0,00014  |
| RAET1L    | -7,82162 | 0,00014  |
| ASPM      | 1,35761  | 0,00014  |
| S100A9    | 8,683857 | 0,000141 |
| LIMCH1    | -2,6867  | 0,000141 |
| KIF3C     | 1,514155 | 0,000142 |
| DES       | -8,09886 | 0,000142 |
| MGC72080  | 1,507328 | 0,000143 |
| NR4A3     | -3,05975 | 0,000143 |
| DENND2D   | 1,328675 | 0,000144 |
| ATG2B     | 1,685977 | 0,000144 |

|           |          |          |
|-----------|----------|----------|
| POU6F2    | 7,856448 | 0,000144 |
| ARV1      | 2,068186 | 0,000144 |
| CFAP97    | -1,32914 | 0,000144 |
| TFB1M     | -1,85185 | 0,000144 |
| ROBO4     | -8,51516 | 0,000144 |
| HADH      | 1,525641 | 0,000145 |
| NUDT1     | 1,702145 | 0,000146 |
| EPN2      | -1,38385 | 0,000146 |
| GADD45GII | 1,454046 | 0,000146 |
| PON3      | -8,07527 | 0,000147 |
| TXNDC12   | -1,39485 | 0,000147 |
| MYSM1     | -1,63893 | 0,000147 |
| KLHDC2    | 1,603766 | 0,000148 |
| HOXA11    | -3,03427 | 0,000148 |
| AMOTL2    | 2,173817 | 0,000149 |
| NELFCD    | 1,515755 | 0,000149 |
| PDZD8     | -1,30249 | 0,000149 |
| MMP1      | -8,21858 | 0,000149 |
| ITPR3     | -1,24177 | 0,00015  |
| TNFRSF10A | -1,65436 | 0,00015  |
| ELMO3     | 1,377384 | 0,000151 |
| TCF12     | -1,51713 | 0,000151 |
| FRRS1     | -2,64311 | 0,000151 |
| NPAS3     | 7,902289 | 0,000151 |
| DBNDD1    | 1,288131 | 0,000151 |
| FOXO1     | -2,37561 | 0,000151 |
| ZNF442    | 7,822419 | 0,000152 |
| GHR       | 7,8258   | 0,000152 |
| SEPT11    | -1,13439 | 0,000152 |
| SNX27     | 1,477015 | 0,000152 |
| NADSYN1   | 1,45897  | 0,000153 |
| COLCA1    | 7,843676 | 0,000154 |
| HIST1H3G  | 7,827151 | 0,000154 |
| DUXAP8    | 2,200388 | 0,000154 |
| CD83      | -1,88703 | 0,000154 |
| ATP8B1    | 1,315155 | 0,000155 |
| REPIN1    | 1,134402 | 0,000156 |
| SNRNP25   | 1,591082 | 0,000156 |
| RHOBTB2   | -1,59203 | 0,000157 |
| DHDH      | -3,63092 | 0,000159 |
| CYS1      | -7,26372 | 0,00016  |
| WIF1      | 8,115369 | 0,00016  |
| HOXD12    | 8,035163 | 0,000161 |
| ACTL8     | 3,387138 | 0,000161 |
| FAM169A   | -2,14705 | 0,000161 |
| IGSF11    | 7,80839  | 0,000161 |
| PSMB2     | -1,08611 | 0,000162 |
| MKNK2     | -1,42592 | 0,000163 |
| CGNL1     | -3,38412 | 0,000163 |
| FLT4      | 7,150035 | 0,000163 |

|           |          |          |
|-----------|----------|----------|
| ALDH1A3   | -5,24579 | 0,000165 |
| PARP2     | -1,22298 | 0,000165 |
| BLNK      | 7,448747 | 0,000166 |
| CLCF1     | -3,26653 | 0,000167 |
| IRF2BPL   | -1,5648  | 0,000167 |
| ATP5A1    | 1,166753 | 0,000168 |
| PNPLA3    | -5,37812 | 0,000169 |
| TAF12     | -1,38702 | 0,000169 |
| RCN3      | 6,076797 | 0,000169 |
| CDH18     | 7,828236 | 0,000169 |
| SPATS2L   | -1,25753 | 0,00017  |
| TIMM17B   | 1,575642 | 0,000172 |
| PRELID1   | 1,129336 | 0,000172 |
| POGZ      | 1,432596 | 0,000172 |
| ZFP36L1   | -1,43544 | 0,000173 |
| BMPR1B    | 7,793532 | 0,000173 |
| PRRG4     | -2,24716 | 0,000176 |
| C21orf58  | 2,044335 | 0,000177 |
| ZBTB1     | 1,255319 | 0,000178 |
| PMEPA1    | 2,875988 | 0,000178 |
| HOTAIRM1  | -3,27593 | 0,000178 |
| LRRC42    | -1,2759  | 0,000178 |
| ELF5      | 3,248214 | 0,000178 |
| MRPL9     | 1,70521  | 0,000179 |
| TRAK2     | 1,218645 | 0,000179 |
| ZCCHC24   | -2,18122 | 0,000179 |
| TMPRSS4   | 4,449219 | 0,00018  |
| GABPB2    | 1,685298 | 0,00018  |
| RAB9B     | 7,801799 | 0,00018  |
| GBA       | 1,771914 | 0,00018  |
| DDX11L2   | -3,82707 | 0,000181 |
| SYNE4     | 1,300773 | 0,000182 |
| AXIN2     | 1,759592 | 0,000182 |
| EGLN1     | -1,2193  | 0,000183 |
| SLC30A7   | -1,54847 | 0,000183 |
| F7        | 8,004526 | 0,000183 |
| ATP6V1C2  | 1,952745 | 0,000183 |
| ACTR3C    | 4,092123 | 0,000183 |
| SLC2A9    | -7,9766  | 0,000183 |
| C1QL4     | -4,50933 | 0,000184 |
| IL6ST     | -1,34    | 0,000184 |
| ZNF345    | 7,779217 | 0,000184 |
| TMEM19    | 1,476921 | 0,000184 |
| DNAJC22   | -1,82176 | 0,000185 |
| KRT23     | -1,87923 | 0,000185 |
| LINC00674 | 1,670943 | 0,000185 |
| CALCOCO2  | -1,83775 | 0,000185 |
| MRAP2     | -8,05432 | 0,000186 |
| GOLIM4    | 1,476256 | 0,000187 |
| LAMB3     | -5,84963 | 0,000187 |



|           |          |          |
|-----------|----------|----------|
| MBD6      | 1,384643 | 0,000187 |
| PSD3      | -1,30734 | 0,000188 |
| PIBF1     | -2,01403 | 0,000189 |
| RNF103    | 1,595338 | 0,00019  |
| PARP8     | -1,91179 | 0,000191 |
| ZNF418    | 7,788684 | 0,000191 |
| MXI1      | -1,43162 | 0,000192 |
| SCAND1    | 1,242482 | 0,000197 |
| SLC12A5   | 5,063688 | 0,000197 |
| CABLES2   | 1,44422  | 0,000197 |
| TBCC      | 1,393995 | 0,000197 |
| PLEKHG1   | -1,84723 | 0,000197 |
| C17orf96  | -1,18583 | 0,000202 |
| CALB2     | -2,98246 | 0,000202 |
| GYG2      | 7,799461 | 0,000202 |
| FSTL3     | -1,97094 | 0,000202 |
| CHAF1B    | -1,32357 | 0,000202 |
| GGCT      | 1,219938 | 0,000202 |
| MSH6      | 1,24653  | 0,000202 |
| ZC3H18    | 1,140471 | 0,000203 |
| PEX26     | 1,210538 | 0,000203 |
| ABHD14B   | -1,2415  | 0,000203 |
| BBX       | -1,28648 | 0,000203 |
| SLC20A1   | -1,13194 | 0,000205 |
| S100A3    | -7,15598 | 0,000205 |
| TARP      | 7,987363 | 0,000206 |
| LNX2      | 1,396648 | 0,000207 |
| EFNA1     | 2,010208 | 0,000208 |
| SAV1      | -1,37985 | 0,000208 |
| SLC30A4   | -3,69214 | 0,000209 |
| KIAA0040  | -1,52203 | 0,00021  |
| LOC11323C | 1,639988 | 0,00021  |
| CTSO      | 2,638029 | 0,00021  |
| NFKB1     | -1,54435 | 0,00021  |
| G6PD      | 2,428719 | 0,00021  |
| PDLIM5    | -1,5354  | 0,000211 |
| TRAM1L1   | 7,908018 | 0,000211 |
| IGF1      | 6,915792 | 0,000212 |
| LGALS1    | -1,7706  | 0,000212 |
| ZNF572    | 2,365891 | 0,000212 |
| ALDOC     | -1,75615 | 0,000213 |
| RELB      | -2,5584  | 0,000213 |
| ZBTB12    | 2,24018  | 0,000213 |
| MED14     | -1,17586 | 0,000215 |
| RRM2      | -1,18776 | 0,000218 |
| TRIM2     | -1,42971 | 0,00022  |
| ATP6V0E1  | 1,599937 | 0,00022  |
| LRRC6     | -3,08223 | 0,00022  |
| MAPKAPK3  | -1,27125 | 0,000221 |
| PPP1R1C   | -2,90397 | 0,000222 |

|            |          |          |
|------------|----------|----------|
| GABPB1-AS1 | 2,137004 | 0,000223 |
| PHC2       | -1,53038 | 0,000225 |
| WIZ        | 1,097014 | 0,000225 |
| FUCA1      | -1,51076 | 0,000227 |
| ZNF772     | 2,821856 | 0,000227 |
| ZNHIT1     | 1,576604 | 0,000229 |
| GATA3-AS1  | 7,745435 | 0,00023  |
| ZNF33B     | 1,376075 | 0,00023  |
| SYT1       | -1,58743 | 0,00023  |
| ZDHHC1     | -2,42808 | 0,000231 |
| G6PC3      | 1,273717 | 0,000231 |
| APPL2      | 1,30989  | 0,000232 |
| COLGALT2   | 5,690752 | 0,000232 |
| RNF180     | 7,783805 | 0,000233 |
| NFATC4     | 2,616738 | 0,000234 |
| ADAM10     | -1,27151 | 0,000234 |
| CYFIP2     | -1,84772 | 0,000234 |
| ATP5J2     | 1,418659 | 0,000237 |
| LINC01006  | 6,88718  | 0,000237 |
| MCF2L      | -1,82701 | 0,000238 |
| NRTN       | -3,00181 | 0,000238 |
| FARS2      | 1,487976 | 0,000239 |
| C11orf45   | -7,96517 | 0,000239 |
| INTS3      | 1,32878  | 0,00024  |
| AKIP1      | -1,48828 | 0,00024  |
| EPM2AIP1   | 1,596023 | 0,00024  |
| CDCA7L     | -1,71281 | 0,000241 |
| STX4       | 1,431361 | 0,000241 |
| TOMM20     | -1,05454 | 0,000241 |
| FMNL3      | 1,744939 | 0,000241 |
| PCDHGA5    | 7,730632 | 0,000242 |
| ADORA1     | -2,45996 | 0,000243 |
| MYADM      | -1,55606 | 0,000243 |
| CNTN1      | -7,13439 | 0,000244 |
| SEC31B     | -4,64018 | 0,000245 |
| LOC101927  | -7,97425 | 0,000245 |
| C7orf73    | 1,129832 | 0,000245 |
| FBN2       | 3,038028 | 0,000248 |
| MON1B      | 1,25105  | 0,000248 |
| MXD4       | 2,82854  | 0,000249 |
| DNAJC30    | 1,573997 | 0,00025  |
| SFR1       | -2,23428 | 0,00025  |
| SAMHD1     | -1,96599 | 0,00025  |
| PCDHGA6    | 7,731072 | 0,000251 |
| CDC42EP5   | 3,922306 | 0,000252 |
| AURKA      | 1,37134  | 0,000252 |
| SCIN       | 5,995094 | 0,000252 |
| HAUS6      | -1,19271 | 0,000253 |
| CHIC1      | 7,71831  | 0,000253 |
| TINCR      | 2,343545 | 0,000253 |

|           |          |          |
|-----------|----------|----------|
| SLC12A9   | 1,76445  | 0,000255 |
| CHPF      | -1,61005 | 0,000256 |
| RSPH3     | -1,60884 | 0,000256 |
| SEC16A    | 1,131889 | 0,000256 |
| PIM3      | -1,32006 | 0,000256 |
| MCPH1     | -1,27322 | 0,000256 |
| METT15    | -1,34715 | 0,000258 |
| CBFA2T2   | 1,354565 | 0,000258 |
| STK31     | 7,749728 | 0,000258 |
| LOC100996 | -7,49232 | 0,000259 |
| INPP5B    | -1,76882 | 0,000264 |
| CXCL3     | -7,99974 | 0,000264 |
| RAB24     | 2,187532 | 0,000264 |
| KBTBD11   | -2,05341 | 0,000265 |
| RELT      | -1,72206 | 0,000266 |
| NR2F1-AS1 | -2,3055  | 0,000267 |
| TAF7      | 1,233966 | 0,000267 |
| DPY19L3   | 1,61317  | 0,00027  |
| SEC11A    | 1,07767  | 0,00027  |
| DEGS1     | -1,52653 | 0,000271 |
| ABAT      | 2,450192 | 0,000272 |
| PSMD5-AS1 | 2,15913  | 0,000274 |
| PARP10    | 2,913883 | 0,000275 |
| FN1       | -2,00156 | 0,000277 |
| MZT2B     | 1,257055 | 0,000277 |
| FLVCR2    | 2,423763 | 0,000279 |
| TMEM52    | -1,48615 | 0,000281 |
| ISL1      | -7,90777 | 0,000283 |
| CTSV      | -2,03476 | 0,000283 |
| HSPA2     | 2,46663  | 0,000285 |
| LOC389602 | -7,91456 | 0,000286 |
| MLXIPL    | -2,11775 | 0,000287 |
| ARL11     | 7,685289 | 0,000287 |
| ICOS      | 7,688723 | 0,000288 |
| XKR7      | 7,767884 | 0,000288 |
| GPR89B    | 2,26489  | 0,000288 |
| SYNE2     | 1,61963  | 0,000288 |
| S100A2    | -3,38423 | 0,000291 |
| KRT17     | 3,577595 | 0,000292 |
| NDFIP2    | -1,26866 | 0,000297 |
| ZSCAN21   | 1,497193 | 0,000299 |
| PLRG1     | -1,0812  | 0,0003   |
| NUP43     | -1,40645 | 0,0003   |
| CDK14     | -2,04819 | 0,000301 |
| PATZ1     | 1,361898 | 0,000302 |
| PLP2      | -1,14218 | 0,000302 |
| PTP4A2    | -1,14446 | 0,000303 |
| COMTD1    | 1,247905 | 0,000303 |
| MYH16     | -7,09048 | 0,000304 |
| RCAN1     | -1,87192 | 0,000304 |

|           |          |          |
|-----------|----------|----------|
| ACD       | -1,22518 | 0,000305 |
| ADAMTSL3  | 7,713189 | 0,000305 |
| C1GALT1   | -1,26071 | 0,000306 |
| STK24     | -1,24829 | 0,000307 |
| STARD9    | -3,01784 | 0,000316 |
| KCTD9     | -1,21642 | 0,000316 |
| IQSEC2    | -1,86421 | 0,000316 |
| ARF3      | 1,120852 | 0,000316 |
| TAF1A     | -2,01219 | 0,000317 |
| CSRP1     | 1,403305 | 0,000319 |
| HP55      | -1,36995 | 0,000319 |
| PLEKHA1   | -1,38645 | 0,000319 |
| FAM27E3   | -7,87006 | 0,000322 |
| TH        | 7,722977 | 0,000322 |
| ZNF607    | 1,466014 | 0,000322 |
| PRRG1     | -2,22126 | 0,000322 |
| CARS      | -1,31569 | 0,000322 |
| RSBN1     | 1,358974 | 0,000323 |
| PTTG1IP   | 1,270535 | 0,000324 |
| HIST1H2AE | 7,913205 | 0,000324 |
| NADK2     | 1,51485  | 0,000324 |
| RASD1     | 3,808596 | 0,000324 |
| ZNF280A   | -7,84266 | 0,000324 |
| CARNMT1   | -1,82379 | 0,000324 |
| MOCOS     | -1,93336 | 0,000324 |
| SLC35F2   | -1,36703 | 0,000327 |
| ESPN      | -1,9263  | 0,000327 |
| RABGAP1   | 1,275029 | 0,000327 |
| POLR2J    | 1,465465 | 0,00033  |
| SNHG16    | -1,10437 | 0,000331 |
| SLC25A1   | 1,259903 | 0,000331 |
| COPG2     | 1,34166  | 0,000333 |
| CALM1     | 1,261528 | 0,000335 |
| DUS4L     | 1,721234 | 0,000336 |
| MDN1      | -1,32133 | 0,000336 |
| TGFB1I1   | -3,80246 | 0,000337 |
| FGF19     | -9,25011 | 0,000338 |
| C12orf75  | -1,42815 | 0,000339 |
| GNB2L1    | 1,00051  | 0,000341 |
| MGC50722  | -7,85224 | 0,000343 |
| PRKCQ     | -7,86209 | 0,000345 |
| MYRF      | -5,61865 | 0,000347 |
| DHRS13    | 1,529105 | 0,000347 |
| LPIN3     | 2,301532 | 0,000347 |
| ADCK1     | 1,658049 | 0,00035  |
| ZNF764    | 1,622793 | 0,00035  |
| AP5M1     | 1,298765 | 0,00035  |
| ZSCAN16   | 2,441216 | 0,000351 |
| HSF2      | -1,35601 | 0,000354 |
| FAM185A   | 2,469464 | 0,000354 |

|           |          |          |
|-----------|----------|----------|
| CHRD      | -3,5378  | 0,000355 |
| PSMD4     | 1,123902 | 0,000355 |
| PANK2     | -1,29087 | 0,000357 |
| LOC101928 | -7,91789 | 0,000359 |
| KIAA1324L | 1,294357 | 0,000362 |
| ZIC5      | -2,77885 | 0,000362 |
| SPATA18   | 4,945817 | 0,000363 |
| UBE2Q2    | 1,342529 | 0,000363 |
| SQLE      | 1,4548   | 0,000363 |
| SH3GL1    | -1,27668 | 0,000365 |
| GPM6B     | 7,617074 | 0,000365 |
| METTLL10  | -1,46432 | 0,000366 |
| SRP68     | -1,17415 | 0,000366 |
| OVOL2     | 3,098504 | 0,000366 |
| EPHB6     | -2,17685 | 0,000367 |
| PKN3      | -1,45426 | 0,000367 |
| TACO1     | 1,126641 | 0,000371 |
| RNF122    | 1,785468 | 0,000371 |
| COX14     | 1,36152  | 0,000372 |
| LHX6      | -2,36834 | 0,000373 |
| APBB2     | -1,257   | 0,000375 |
| RAB1B     | 1,439161 | 0,000376 |
| FLNB      | -1,23866 | 0,000378 |
| PUS10     | 2,027068 | 0,000382 |
| TMEM132f  | 8,27195  | 0,000382 |
| RNF125    | -2,23645 | 0,000382 |
| NSMF      | -1,56897 | 0,000384 |
| ID4       | 5,712585 | 0,000384 |
| CCPG1     | 2,81537  | 0,000385 |
| IGSF5     | 4,011027 | 0,000387 |
| ZNF571    | 5,471635 | 0,000388 |
| UTP6      | -1,1439  | 0,00039  |
| HOXB9     | -5,50163 | 0,000392 |
| AP2A2     | -1,11261 | 0,000392 |
| GIPR      | -7,8159  | 0,000392 |
| SULT1C2   | -7,8159  | 0,000392 |
| FER1L4    | -3,01909 | 0,000395 |
| KCNU1     | 7,61238  | 0,000396 |
| POMT1     | 1,555221 | 0,000403 |
| SRGAP2    | 1,069908 | 0,000405 |
| GSTO2     | -1,1609  | 0,000406 |
| PRRT3-AS1 | -4,96134 | 0,000408 |
| ATP1A3    | -1,77301 | 0,000409 |
| GPX3      | 10,42365 | 0,000409 |
| TMEM14C   | 1,192599 | 0,000409 |
| ORMDL2    | 1,700898 | 0,00041  |
| TMEM254   | 3,147194 | 0,000411 |
| GRB14     | 1,705775 | 0,000411 |
| SEC31A    | 1,265814 | 0,000412 |
| LCOR      | -1,28117 | 0,000416 |

|           |          |          |
|-----------|----------|----------|
| GDE1      | 1,149899 | 0,000422 |
| DIAPH2    | -1,50132 | 0,000423 |
| BLOC1S3   | 1,405552 | 0,000423 |
| CSK       | 1,482662 | 0,000424 |
| MGC32805  | 7,759047 | 0,000425 |
| AHDC1     | -1,37437 | 0,000427 |
| ZNF100    | 1,344153 | 0,000428 |
| APBA3     | -1,4078  | 0,000428 |
| ZFP36     | -2,36094 | 0,000429 |
| TMEM135   | -1,50459 | 0,000432 |
| HLX       | -5,99792 | 0,000435 |
| CEP170    | -1,15582 | 0,000435 |
| UVRAG     | 1,415553 | 0,000435 |
| KIAA1804  | -1,92788 | 0,000436 |
| MYD88     | 1,457596 | 0,000436 |
| ZNF766    | 1,171545 | 0,000436 |
| MAGOH     | -1,13801 | 0,000437 |
| FOXM1     | 1,071656 | 0,000437 |
| TMEM221   | -3,56153 | 0,000441 |
| AGBL2     | 7,570375 | 0,000442 |
| WDFY1     | -1,13084 | 0,000442 |
| SPX       | -6,06185 | 0,000447 |
| KIAA1841  | 2,076327 | 0,000447 |
| SLC52A1   | 7,759766 | 0,000447 |
| FGB       | 5,981685 | 0,000448 |
| BOP1      | -1,01088 | 0,000448 |
| H3F3AP4   | 1,180223 | 0,000448 |
| COASY     | -1,05025 | 0,000448 |
| LINC01098 | -7,78901 | 0,000449 |
| SEC22B    | 1,212266 | 0,000449 |
| CD163L1   | -3,22018 | 0,00045  |
| TNKS2     | 1,301821 | 0,00045  |
| CAND1     | 1,079113 | 0,000454 |
| TXNRD1    | -1,44355 | 0,000455 |
| DNAJC15   | 1,31981  | 0,000455 |
| DNASE1L1  | 1,585317 | 0,000455 |
| LOC100134 | 4,465646 | 0,000456 |
| FAM111B   | 1,405784 | 0,000456 |
| EAPP      | 1,270795 | 0,00046  |
| BIRC2     | -1,63155 | 0,000461 |
| PM20D2    | -1,63996 | 0,000461 |
| ZNF426    | -4,96848 | 0,000461 |
| ZCCHC7    | -1,32453 | 0,000461 |
| TSPAN31   | 1,8642   | 0,000461 |
| C11orf80  | 1,539044 | 0,000465 |
| LYPD3     | 1,805386 | 0,000466 |
| PDCD11    | -1,20714 | 0,000467 |
| GINS2     | 1,183061 | 0,000472 |
| TET1      | 2,152043 | 0,000474 |
| BTBD11    | -1,70009 | 0,000476 |

|           |          |          |
|-----------|----------|----------|
| PPT1      | 1,272594 | 0,000481 |
| ADRA2C    | 1,324482 | 0,000484 |
| CLSTN1    | -1,11953 | 0,000485 |
| B3GALNT1  | 1,478649 | 0,000487 |
| NKX6-1    | -2,24822 | 0,000487 |
| LCMT2     | 1,5221   | 0,000488 |
| ZNRF2     | 1,50141  | 0,000488 |
| PIP5K1B   | 6,688401 | 0,000488 |
| RNF130    | 1,203287 | 0,000488 |
| FAM81B    | 5,211369 | 0,000489 |
| SIRT5     | 1,323986 | 0,00049  |
| XKR8      | -1,68945 | 0,00049  |
| ZC2HC1A   | -2,03288 | 0,00049  |
| FAM178B   | 5,317604 | 0,000494 |
| MXD3      | 1,526651 | 0,000494 |
| KLHL5     | -1,51055 | 0,000495 |
| COMT      | 1,603921 | 0,000497 |
| TMEM92    | -3,83539 | 0,000497 |
| MAK16     | -1,35875 | 0,0005   |
| EHMT2     | 1,389037 | 0,000503 |
| ATG13     | 1,318872 | 0,000504 |
| ASH1L-AS1 | 3,183145 | 0,000506 |
| FKBP14    | -1,49876 | 0,000508 |
| FMN1      | 2,83861  | 0,000509 |
| CMTR1     | 1,135397 | 0,000509 |
| RPS6KB2   | 1,204627 | 0,000517 |
| COX6A1    | 0,997369 | 0,000521 |
| SGK1      | -1,89882 | 0,000527 |
| GALNT6    | 1,504524 | 0,000527 |
| MYOM2     | -7,82138 | 0,000528 |
| SAXO2     | -7,7296  | 0,000528 |
| MAP3K11   | 1,578146 | 0,000529 |
| TBC1D4    | -1,98959 | 0,000529 |
| MAP3K5    | -1,99073 | 0,000531 |
| DPYD      | -7,7233  | 0,000532 |
| RNF145    | -1,62178 | 0,000532 |
| DLG1      | 1,13687  | 0,000535 |
| NDUFB2    | 1,12968  | 0,000536 |
| MSI2      | -1,21928 | 0,000536 |
| LHX2      | -1,96872 | 0,000537 |
| TFPT      | 1,818777 | 0,00054  |
| HLA-DRB5  | 5,301254 | 0,000542 |
| ARHGAP24  | -2,63245 | 0,000545 |
| ACACB     | 1,441445 | 0,000547 |
| POLD3     | 1,189763 | 0,000547 |
| FEZF1-AS1 | -7,74739 | 0,000548 |
| MYL6      | 1,112655 | 0,000551 |
| SBF2      | -1,84926 | 0,000554 |
| RNF207    | -2,31589 | 0,000557 |
| ZNF891    | 7,545464 | 0,000557 |

|           |          |          |
|-----------|----------|----------|
| LOC389641 | -1,55861 | 0,000559 |
| PRKD1     | 7,55984  | 0,00056  |
| SLC44A5   | -6,88423 | 0,000562 |
| PLEC      | -1,65294 | 0,000568 |
| ATXN7L1   | 1,527115 | 0,000568 |
| NBPF11    | 2,105192 | 0,00057  |
| DYM       | 1,228316 | 0,000572 |
| PPP2R2D   | 1,146057 | 0,000576 |
| KRT86     | 4,023839 | 0,000577 |
| LYPD5     | -6,93532 | 0,00058  |
| ANGPTL4   | -5,68795 | 0,00058  |
| CSTA      | -2,08894 | 0,000581 |
| CCDC167   | 1,668751 | 0,000585 |
| NAA60     | 1,086328 | 0,000586 |
| CORIN     | -7,7986  | 0,000586 |
| ENDOG     | 1,264275 | 0,000586 |
| PTPN14    | -1,85032 | 0,000588 |
| LAMA5     | 1,041139 | 0,000588 |
| CEP85L    | -2,16575 | 0,000593 |
| TCHHL1    | 8,172988 | 0,000596 |
| TTC6      | 7,51459  | 0,000596 |
| C20orf27  | 1,031265 | 0,000596 |
| CHPF2     | 1,780749 | 0,000596 |
| IGFL1     | 8,116563 | 0,000596 |
| BRD4      | 1,335718 | 0,000597 |
| SMKR1     | 1,773827 | 0,000599 |
| GLIDR     | 2,830413 | 0,000599 |
| SLAMF7    | -7,70104 | 0,000602 |
| LRP8      | -1,40892 | 0,000603 |
| WWP1      | 1,533205 | 0,000604 |
| SDCCAG8   | -1,79565 | 0,000604 |
| LRRK2     | 6,649609 | 0,000605 |
| AGL       | -1,30712 | 0,000606 |
| CALCR     | 4,02029  | 0,000608 |
| C8orf48   | 7,511556 | 0,000609 |
| PSMB4     | 1,075678 | 0,000617 |
| C21orf59  | -1,16055 | 0,000618 |
| TRIM26    | 1,11415  | 0,000618 |
| ARPIN     | -2,02245 | 0,000625 |
| LINC00673 | -6,21389 | 0,000626 |
| FOXA2     | 5,683235 | 0,000626 |
| SUV420H1  | 1,135315 | 0,00063  |
| SLC16A14  | -1,82461 | 0,000631 |
| NODAL     | 5,044257 | 0,000631 |
| TRPM2     | -1,39949 | 0,000631 |
| CALML5    | 7,569104 | 0,000631 |
| KIAA1217  | 2,244667 | 0,000632 |
| MIR614    | -6,88347 | 0,000632 |
| PPTC7     | -1,19078 | 0,000633 |
| ZNF510    | 1,543221 | 0,000633 |



|          |          |          |
|----------|----------|----------|
| ZNF268   | 1,378906 | 0,000634 |
| KDM2A    | 1,20125  | 0,000634 |
| MARCH3   | -3,60714 | 0,000636 |
| CYB5R3   | -1,2444  | 0,000636 |
| FAM46C   | 2,394627 | 0,000637 |
| PDIA3    | -1,00704 | 0,000637 |
| ERGIC1   | 1,146697 | 0,000637 |
| AGPAT5   | -1,28075 | 0,000648 |
| STX16    | 1,341112 | 0,000649 |
| RPL22L1  | -1,49503 | 0,00065  |
| SLC45A3  | -1,69467 | 0,000656 |
| PIP4K2A  | -1,13071 | 0,000656 |
| CYSTM1   | -1,32849 | 0,000656 |
| RSPO4    | -5,07233 | 0,000656 |
| PLXND1   | -1,43722 | 0,000657 |
| CATSPER1 | -7,93151 | 0,000657 |
| IL21R    | -3,5792  | 0,000657 |
| ZC3H4    | 1,14636  | 0,000659 |
| IFI6     | 2,593652 | 0,000661 |
| TMEM145  | -4,38037 | 0,000661 |
| KCNC3    | 1,533675 | 0,000663 |
| PCGF6    | -1,66333 | 0,000665 |
| AHCTF1   | -1,20875 | 0,000667 |
| TBC1D20  | -1,13884 | 0,000667 |
| PSMB9    | -3,17268 | 0,000667 |
| PPAT     | -1,3717  | 0,000668 |
| PLCB1    | 1,490393 | 0,000669 |
| CEP85    | -1,62786 | 0,00067  |
| COL4A6   | -6,85083 | 0,000673 |
| DENND3   | -2,51937 | 0,000674 |
| SEL1L    | 1,168251 | 0,000677 |
| SLC29A2  | 1,451889 | 0,000677 |
| AATBC    | 7,475633 | 0,00068  |
| TYW3     | -1,40938 | 0,00068  |
| STK38    | 1,189965 | 0,00068  |
| LAMTOR1  | 1,130218 | 0,000681 |
| PPM1K    | -2,58901 | 0,000682 |
| EPB41L4A | -2,39193 | 0,000682 |
| PFKFB3   | -1,52106 | 0,000684 |
| DLD      | 1,313985 | 0,000684 |
| PCCB     | 1,028536 | 0,000693 |
| PLCXD2   | -2,93917 | 0,000693 |
| CAPN9    | 7,494649 | 0,000694 |
| SLC25A37 | -1,34766 | 0,000694 |
| OAS2     | 5,060692 | 0,000694 |
| TYMS     | -1,3858  | 0,000694 |
| ZNF519   | 1,999769 | 0,000694 |
| PHOSPHO1 | -3,08299 | 0,000695 |
| AOC2     | -3,08314 | 0,000698 |
| EPB41L5  | 1,57625  | 0,000699 |

|           |          |          |
|-----------|----------|----------|
| SNAR-E    | 5,798747 | 0,000703 |
| INSIG1    | 1,699162 | 0,000703 |
| VPS37A    | -1,13657 | 0,000703 |
| BEX5      | 7,63965  | 0,000703 |
| ITGA1     | -6,83008 | 0,000704 |
| MOB3B     | -4,70064 | 0,000705 |
| TMEM134   | 1,414956 | 0,000707 |
| LPPR3     | 7,728433 | 0,000713 |
| PRKAR2A   | -1,74214 | 0,000713 |
| LOC441666 | 7,479079 | 0,000723 |
| ENPP4     | -1,57999 | 0,000723 |
| A4GALT    | -2,31884 | 0,000724 |
| ZNF114    | 1,549986 | 0,000729 |
| PLXNB1    | 1,381617 | 0,000729 |
| ING4      | 2,662632 | 0,00073  |
| TAPT1-AS1 | 3,96002  | 0,00073  |
| DIRAS3    | -11,5853 | 0,00073  |
| LINC00880 | -7,68517 | 0,000731 |
| SERPINF2  | -4,09541 | 0,000732 |
| SSBP2     | 2,650005 | 0,000732 |
| VAX2      | 4,18439  | 0,000732 |
| GAREM     | -1,47607 | 0,000734 |
| CACNA1A   | -7,68835 | 0,000734 |
| FAR2P1    | 2,869039 | 0,00074  |
| SLC43A2   | 1,41194  | 0,00074  |
| ZSWIM4    | 1,811731 | 0,00074  |
| MAP7D1    | -1,21277 | 0,000743 |
| YBX3      | -1,01992 | 0,000744 |
| CTR9      | -1,64224 | 0,000745 |
| WNT10B    | -1,55609 | 0,000745 |
| C2orf54   | 4,350308 | 0,000747 |
| SYCE1L    | -4,45576 | 0,000747 |
| UNC5C     | 5,834953 | 0,000747 |
| CCDC53    | 1,478133 | 0,000755 |
| SUCLG1    | 1,054226 | 0,000757 |
| ATP2B1    | -1,26251 | 0,000762 |
| ZKSCAN2   | -1,2509  | 0,000762 |
| PTPN18    | 1,111526 | 0,000762 |
| NR6A1     | -1,80636 | 0,000762 |
| SNHG3     | -1,43402 | 0,000762 |
| BTNL9     | -3,37271 | 0,000763 |
| RBM15B    | 1,065071 | 0,000763 |
| JAM2      | 4,038849 | 0,000766 |
| CDC37L1   | -1,30824 | 0,000767 |
| C3orf80   | -3,7604  | 0,000771 |
| KANSL1L   | 1,701884 | 0,000776 |
| PEX11B    | 1,620089 | 0,000779 |
| MRC2      | -2,28708 | 0,000781 |
| ARIH2     | -1,04358 | 0,000783 |
| GATSL2    | 2,207468 | 0,000783 |

|           |          |          |
|-----------|----------|----------|
| WWC2      | -1,23601 | 0,000787 |
| SHF       | 2,045725 | 0,000787 |
| ZNF394    | 1,561077 | 0,000793 |
| TMEM87B   | 1,338885 | 0,000795 |
| HOPX      | 7,657735 | 0,000797 |
| ACTB      | 1,302973 | 0,000797 |
| MRPS11    | 1,291088 | 0,000801 |
| CSF2RA    | -7,78772 | 0,000803 |
| ATP6V1B1- | -7,61677 | 0,000803 |
| TRABD2A   | -4,00359 | 0,000803 |
| PDGFB     | -2,0261  | 0,000809 |
| PROSC     | -1,11548 | 0,000809 |
| FHL3      | -1,50711 | 0,000809 |
| KCTD17    | -1,81634 | 0,00081  |
| AZIN2     | -3,21359 | 0,00081  |
| ARHGAP12  | -1,28644 | 0,00081  |
| PBK       | -1,34743 | 0,00081  |
| GBE1      | -1,26305 | 0,000811 |
| BBS7      | -1,28515 | 0,000818 |
| SGCG      | 7,567556 | 0,000818 |
| VGLL4     | 1,051728 | 0,000818 |
| ZNF709    | 5,624394 | 0,000819 |
| ARC       | -2,62213 | 0,00082  |
| NDUFS8    | 1,026979 | 0,000822 |
| DYNLL1    | 1,001261 | 0,000826 |
| ZNF627    | 1,336576 | 0,000829 |
| YPEL1     | 4,013251 | 0,000833 |
| C7orf26   | 1,078111 | 0,000835 |
| OPN3      | 1,836421 | 0,000836 |
| LAMTOR4   | 1,12251  | 0,000838 |
| C2CD4D    | 6,560771 | 0,000839 |
| LOC101928 | -4,41704 | 0,00084  |
| P2RY1     | -5,76046 | 0,000843 |
| PPP4R3A   | 1,147217 | 0,000847 |
| OXGR1     | 7,458291 | 0,00085  |
| CD96      | -6,76752 | 0,00085  |
| GPR63     | -2,30801 | 0,000851 |
| JHDM1D-A  | 2,800448 | 0,000852 |
| EPC1      | 1,122748 | 0,000853 |
| TMEM254   | 1,508633 | 0,000854 |
| IFI27     | 3,827664 | 0,000859 |
| RFXANK    | 1,219726 | 0,000862 |
| SPRY2     | -2,05758 | 0,000864 |
| SERPINH1  | 1,255795 | 0,000864 |
| YIPF6     | -1,14464 | 0,000868 |
| DDX52     | -1,1322  | 0,000869 |
| KIF13B    | -1,96708 | 0,000869 |
| TRMT61A   | 1,334256 | 0,000872 |
| VAPB      | 1,116814 | 0,000874 |
| RUFY1     | 1,147307 | 0,000881 |

|           |          |          |
|-----------|----------|----------|
| CERS1     | 4,507423 | 0,000883 |
| JUP       | 1,505871 | 0,000887 |
| FBXO41    | -1,51528 | 0,000887 |
| PPIEL     | -5,74967 | 0,000893 |
| LYSMD2    | 1,574008 | 0,000893 |
| C10orf10  | -5,73823 | 0,000895 |
| PNMA6A    | 7,441092 | 0,000897 |
| CDK7      | -1,06226 | 0,000899 |
| ZNF74     | 1,27061  | 0,000905 |
| LINC00885 | 7,659283 | 0,000905 |
| PLA2G4F   | 4,076638 | 0,000907 |
| PCDHGA4   | 6,513609 | 0,000908 |
| IFT46     | 1,502763 | 0,000909 |
| IBSP      | 7,394631 | 0,000909 |
| SCD5      | -1,31161 | 0,000927 |
| FER       | -1,22687 | 0,000927 |
| TICAM1    | -1,20187 | 0,000928 |
| SYMPK     | -1,0869  | 0,000928 |
| CCDC88C   | 1,451313 | 0,000931 |
| RN7SK     | 3,335847 | 0,000933 |
| PIGB      | 1,632087 | 0,000939 |
| NDUFA12   | 1,181625 | 0,00094  |
| UGGT2     | -1,54288 | 0,000941 |
| BMP8A     | -2,61174 | 0,000941 |
| SAMD15    | 2,641378 | 0,000941 |
| ITPR1     | -1,67223 | 0,000943 |
| GUSBP4    | 2,166702 | 0,000944 |
| KANK3     | -3,20751 | 0,000946 |
| PITPNM2   | -1,50203 | 0,000954 |
| STX2      | -1,49741 | 0,000955 |
| PAGR1     | 1,05042  | 0,000957 |
| RTFDC1    | 1,083233 | 0,00096  |
| CACHD1    | -1,90027 | 0,000961 |
| TM4SF18   | -7,68446 | 0,000965 |
| ATF4      | -1,30942 | 0,000966 |
| TBCCD1    | -1,29633 | 0,000969 |
| MLF1      | -1,42152 | 0,000973 |
| CLCN3     | -1,22773 | 0,000975 |
| ATMIN     | 1,064958 | 0,000976 |
| NBN       | 0,999804 | 0,000978 |
| OSER1     | 1,148199 | 0,000981 |
| TARBP2    | 1,093676 | 0,000988 |
| PKN2      | -1,18313 | 0,000991 |
| P2RX4     | 1,685863 | 0,000992 |
| FAM193B   | 1,43879  | 0,000992 |
| NME1      | -1,05327 | 0,000994 |
| TBL1XR1   | -1,21948 | 0,000996 |
| LDHB      | -10,0745 | 0,001001 |
| KCNK3     | -5,87716 | 0,001001 |
| GDPD1     | -2,00763 | 0,001004 |

|         |          |          |
|---------|----------|----------|
| FAM149A | -3,45221 | 0,001004 |
| ONECUT1 | 2,994159 | 0,001004 |
| KDM5D   | -7,62681 | 0,001005 |
| PPIE    | -1,05426 | 0,001005 |
| PPP2R5B | -1,8832  | 0,00101  |

RFX393

| Gene      | log2FoldCh | FDR      |
|-----------|------------|----------|
| APCDD1    | 15,97544   | 1,65E-26 |
| CDH1      | 15,9393    | 3,15E-26 |
| MYH14     | 15,05027   | 1,28E-22 |
| GATA3     | 14,91681   | 4,62E-23 |
| FBP1      | 14,63437   | 3,39E-22 |
| HID1      | 14,26106   | 2,81E-20 |
| TSPYL5    | 14,09069   | 7,90E-21 |
| GRHL2     | 13,78605   | 1,45E-19 |
| KCTD15    | 13,7853    | 9,10E-19 |
| ACSS3     | 13,6889    | 1,17E-19 |
| IGFBP2    | 13,51841   | 4,21E-19 |
| SPDEF     | 13,51532   | 3,34E-10 |
| EPN3      | 13,43565   | 9,37E-19 |
| TJP3      | 13,24836   | 3,01E-17 |
| TMEM30B   | 12,95434   | 1,73E-17 |
| ATAD1     | 12,91144   | 1,58E-17 |
| MSI1      | 12,87385   | 2,84E-17 |
| DSCAM-AS1 | 12,80709   | 5,38E-10 |
| MSX2      | 12,65199   | 1,96E-16 |
| GAL       | 12,56971   | 1,32E-16 |
| SLC27A2   | 12,56716   | 1,62E-16 |
| CDH3      | 12,45552   | 1,28E-45 |
| GGT6      | 12,43375   | 5,45E-15 |
| PCDHA6    | 12,38586   | 4,35E-16 |
| PPM1E     | 12,28458   | 1,73E-09 |
| LINGO1    | 12,25237   | 1,08E-15 |
| ADAMTS19  | 12,24773   | 1,05E-15 |
| PRR15L    | 12,24731   | 2,82E-15 |
| IRX2      | 12,16643   | 1,75E-15 |
| FXYD3     | 12,11972   | 2,37E-08 |
| ALDH3B2   | 12,07213   | 3,28E-14 |
| SPTSSB    | 12,05193   | 5,33E-14 |
| EMB       | 11,97689   | 4,89E-15 |
| WNK2      | 11,96096   | 7,86E-15 |
| POF1B     | 11,92583   | 5,29E-14 |
| CACNG4    | 11,88115   | 1,09E-14 |
| PCDHA11   | 11,76471   | 3,32E-14 |
| PCDHB2    | 11,74461   | 3,28E-14 |
| TMEM150C  | 11,73412   | 3,75E-14 |
| CBFA2T3   | 11,72536   | 2,22E-14 |
| RBBP8NL   | 11,69948   | 4,07E-14 |
| TNFAIP8L3 | 11,66176   | 2,85E-13 |
| DLX5      | 11,65328   | 3,91E-14 |
| GATS      | 11,64457   | 3,63E-13 |
| LIN7A     | 11,64058   | 6,13E-14 |
| C15orf59  | 11,63864   | 2,32E-13 |
| PTP4A3    | 11,61437   | 4,42E-14 |
| CCDC170   | 11,57212   | 9,57E-13 |

|          |          |           |
|----------|----------|-----------|
| SLC1A2   | 11,56487 | 6,59E-14  |
| S100A14  | 11,54958 | 2,36E-10  |
| ADCY1    | 11,53153 | 8,79E-14  |
| SULT2B1  | 11,52374 | 1,33E-13  |
| PCSK1N   | 11,50922 | 8,09E-14  |
| OLFM1    | 11,50058 | 8,05E-14  |
| GLB1L2   | 11,48892 | 8,86E-14  |
| LRFN4    | 11,46212 | 2,97E-16  |
| HENMT1   | 11,41139 | 1,40E-13  |
| ZIC1     | 11,34805 | 5,27E-13  |
| CRISPLD1 | 11,32855 | 1,34E-12  |
| NCAM2    | 11,30336 | 8,72E-13  |
| ESPN     | 11,30165 | 3,23E-12  |
| ALOX15   | 11,27582 | 9,27E-12  |
| TMEM45B  | 11,25578 | 3,36E-13  |
| AR       | 11,23266 | 3,93E-13  |
| ZNF569   | 11,19733 | 9,65E-13  |
| ERBB3    | 11,16316 | 2,52E-36  |
| SMIM22   | 11,16211 | 8,83E-13  |
| EPHA1    | 11,13204 | 1,03E-12  |
| MNX1     | 11,11334 | 8,21E-13  |
| ASCL2    | 11,03969 | 4,88E-12  |
| C5orf38  | 11,03155 | 2,22E-12  |
| PCP4     | 11,02888 | 1,55E-12  |
| MNX1-AS1 | 10,994   | 4,10E-12  |
| ASCL4    | 10,98128 | 2,02E-12  |
| NUP210   | 10,91268 | 1,82E-65  |
| PACSIN1  | 10,89891 | 1,47E-11  |
| ENTPD2   | 10,89427 | 8,15E-12  |
| RNF43    | 10,88282 | 9,15E-11  |
| ARHGDIG  | 10,8827  | 2,96E-12  |
| NUP210L  | 10,85694 | 3,72E-12  |
| EFS      | 10,85139 | 4,00E-12  |
| DLX3     | 10,84673 | 6,00E-14  |
| TDRD1    | 10,8345  | 3,82E-12  |
| ST8SIA4  | 10,83418 | 6,28E-11  |
| SBK1     | 10,82154 | 1,98E-23  |
| ARHGEF26 | 10,79318 | 5,01E-12  |
| RDH16    | 10,78598 | 6,73E-12  |
| KRT8     | 10,77064 | 6,07E-188 |
| RANBP17  | 10,7565  | 1,00E-11  |
| CACNA1D  | 10,71404 | 7,49E-12  |
| MED12L   | 10,68748 | 2,61E-11  |
| HS6ST2   | 10,6606  | 1,75E-13  |
| PGR      | 10,64303 | 5,36E-10  |
| CST1     | 10,63197 | 1,52E-11  |
| C5AR2    | 10,62868 | 6,39E-11  |
| FAM155B  | 10,6137  | 1,46E-11  |
| ZNF793   | 10,59621 | 1,67E-11  |
| FAM3B    | 10,59103 | 1,56E-11  |

|          |          |          |
|----------|----------|----------|
| MPDZ     | 10,55379 | 3,25E-11 |
| NAALADL2 | 10,53386 | 3,17E-11 |
| LAD1     | 10,51462 | 1,72E-48 |
| VHL      | 10,40108 | 7,51E-30 |
| SPESP1   | 10,40089 | 8,06E-11 |
| TMEM125  | 10,33577 | 6,63E-11 |
| HES2     | 10,32485 | 3,11E-09 |
| ODAM     | 10,25357 | 1,05E-10 |
| CEACAM21 | 10,24467 | 1,22E-10 |
| PCDHB3   | 10,22133 | 1,32E-12 |
| TDRD5    | 10,21998 | 1,93E-10 |
| HDHD1    | 10,2152  | 1,97E-10 |
| TSPEAR   | 10,21316 | 3,33E-10 |
| MYRIP    | 10,21051 | 3,13E-10 |
| C9orf152 | 10,21046 | 2,48E-12 |
| RTN4RL1  | 10,1929  | 6,41E-21 |
| CHGA     | 10,17584 | 1,59E-10 |
| EFNB3    | 10,17486 | 1,66E-10 |
| DPYSL4   | 10,15114 | 5,69E-10 |
| SLC9B2   | 10,14817 | 2,25E-10 |
| PCDHA10  | 10,12635 | 2,83E-10 |
| ABCG1    | 10,10235 | 1,58E-12 |
| KCNJ11   | 10,10148 | 7,06E-10 |
| CASC9    | 10,05205 | 3,22E-10 |
| NYNRIN   | 10,04999 | 2,37E-08 |
| RAB25    | 10,03756 | 6,93E-45 |
| FREM2    | 10,02204 | 3,32E-91 |
| LRRC26   | 10,01228 | 4,02E-10 |
| AARD     | 9,996854 | 4,47E-10 |
| EPHX2    | 9,991915 | 8,17E-10 |
| NFE2     | 9,987011 | 9,13E-10 |
| PCDHA12  | 9,984583 | 7,48E-10 |
| MYO5C    | 9,98282  | 1,77E-65 |
| CHRM1    | 9,97669  | 2,12E-09 |
| ZNF570   | 9,976164 | 5,10E-10 |
| HIST3H2A | 9,9669   | 5,20E-10 |
| SIDT1    | 9,966327 | 6,43E-10 |
| HLA-DQB1 | 9,957333 | 2,71E-08 |
| PTEN     | 9,948171 | 3,42E-51 |
| RNF223   | 9,942623 | 7,45E-10 |
| KRTAP3-1 | 9,883615 | 4,20E-09 |
| PRR15    | 9,879456 | 1,26E-09 |
| PRRG2    | 9,878964 | 1,81E-09 |
| C18orf63 | 9,852165 | 1,37E-09 |
| RERG     | 9,843537 | 1,03E-09 |
| SALL4    | 9,829514 | 2,07E-09 |
| STS      | 9,823508 | 2,25E-09 |
| OVOL2    | 9,7665   | 2,49E-08 |
| ERBB4    | 9,765947 | 2,49E-09 |
| MLXIPL   | 9,76218  | 2,62E-09 |



|           |          |           |
|-----------|----------|-----------|
| ZNF732    | 9,701412 | 4,56E-09  |
| ZNF790-AS | 9,681709 | 2,79E-09  |
| RUNDC3A-  | 9,676425 | 1,80E-08  |
| NOTCH3    | 9,668522 | 1,03E-124 |
| ASCL1     | 9,665095 | 6,03E-09  |
| ADGRL2    | 9,641219 | 3,64E-09  |
| CDKN2B    | 9,623516 | 6,26E-09  |
| FAR2P1    | 9,595467 | 3,13E-08  |
| ELF5      | 9,577022 | 4,20E-08  |
| DEGS2     | 9,576988 | 5,88E-09  |
| GNB4      | 9,552122 | 5,15E-09  |
| STXBP6    | 9,540514 | 5,71E-09  |
| ZNF818P   | 9,531062 | 5,85E-09  |
| SYT3      | 9,519156 | 2,69E-08  |
| ZNF704    | 9,502241 | 1,65E-24  |
| CHST8     | 9,486553 | 7,44E-09  |
| SYT17     | 9,480654 | 5,51E-11  |
| S100P     | 9,454517 | 1,29E-06  |
| PCSK9     | 9,450355 | 1,15E-07  |
| NOVA1     | 9,44733  | 1,56E-08  |
| TMPRSS13  | 9,42122  | 1,40E-10  |
| JPH3      | 9,407293 | 1,16E-08  |
| KLLN      | 9,401508 | 9,10E-08  |
| VIPR1     | 9,366299 | 1,17E-07  |
| MAPK4     | 9,358247 | 2,60E-07  |
| TUBA3E    | 9,351443 | 2,87E-08  |
| ZG16B     | 9,331266 | 1,74E-07  |
| SLC16A14  | 9,32614  | 4,19E-08  |
| NFATC4    | 9,323664 | 2,00E-08  |
| ENPP5     | 9,316832 | 3,87E-08  |
| FSD1      | 9,308084 | 2,28E-08  |
| C10orf82  | 9,307468 | 3,27E-08  |
| MUC5B     | 9,300814 | 2,16E-08  |
| DPYSL5    | 9,293799 | 2,63E-10  |
| CBLC      | 9,287005 | 2,87E-08  |
| PKP2      | 9,286406 | 7,71E-21  |
| TEX19     | 9,28594  | 2,72E-08  |
| SPINK5    | 9,281785 | 1,19E-07  |
| DOCK8     | 9,273276 | 2,56E-08  |
| TYRP1     | 9,26941  | 2,69E-08  |
| ERC2      | 9,255166 | 2,63E-08  |
| SLC47A1   | 9,237772 | 4,41E-08  |
| MYT1      | 9,23213  | 3,04E-08  |
| MANSC4    | 9,231071 | 3,50E-06  |
| TFF1      | 9,224533 | 8,98E-53  |
| MB        | 9,222074 | 2,69E-10  |
| GPR158    | 9,215829 | 3,59E-08  |
| IRX4      | 9,20963  | 6,87E-08  |
| FAM19A5   | 9,193827 | 6,41E-08  |
| ICA1      | 9,187911 | 1,94E-35  |

|           |          |          |
|-----------|----------|----------|
| GDPD1     | 9,18196  | 9,03E-08 |
| PCDHGB5   | 9,154395 | 4,52E-08 |
| PBX1      | 9,148541 | 1,09E-22 |
| LOC148705 | 9,145146 | 5,05E-08 |
| EOMES     | 9,138573 | 5,47E-08 |
| DDX43     | 9,123634 | 7,62E-08 |
| AQP3      | 9,123612 | 1,76E-05 |
| GPR27     | 9,116953 | 7,29E-08 |
| VPS9D1-AS | 9,108391 | 4,75E-06 |
| GYLTL1B   | 9,106885 | 1,63E-34 |
| C2orf54   | 9,063702 | 8,88E-07 |
| PLA2G4F   | 9,062513 | 3,92E-06 |
| KCNK5     | 9,061931 | 3,42E-07 |
| LRRC3     | 9,050911 | 9,59E-08 |
| LMX1B     | 9,04411  | 7,40E-10 |
| TC2N      | 9,042076 | 1,12E-31 |
| EGR3      | 9,038839 | 1,85E-06 |
| KLRG2     | 9,029619 | 1,19E-07 |
| ACTL8     | 9,01931  | 2,01E-07 |
| ZNF730    | 8,97477  | 1,38E-07 |
| SELENBP1  | 8,97377  | 4,06E-33 |
| LYPD6B    | 8,967811 | 1,37E-07 |
| C17orf104 | 8,947897 | 7,17E-07 |
| EMID1     | 8,937782 | 1,65E-07 |
| LOC100505 | 8,932349 | 2,24E-07 |
| LRP3      | 8,922783 | 4,01E-12 |
| HBA1      | 8,920295 | 3,84E-07 |
| ONECUT1   | 8,901736 | 4,20E-07 |
| LGR6      | 8,895304 | 2,87E-07 |
| CA8       | 8,894837 | 2,97E-07 |
| BSPRY     | 8,88377  | 2,90E-32 |
| COL4A5    | 8,882935 | 4,61E-07 |
| KIAA1324L | 8,877359 | 1,01E-27 |
| CNGB3     | 8,869793 | 3,02E-07 |
| LOC339862 | 8,863963 | 2,49E-07 |
| LRRN1     | 8,85573  | 3,02E-07 |
| SFMBT2    | 8,850203 | 4,05E-07 |
| RIC3      | 8,843573 | 4,28E-07 |
| GALNT16   | 8,831498 | 9,16E-05 |
| PCDHB4    | 8,827213 | 1,37E-06 |
| PALM3     | 8,822815 | 2,78E-07 |
| FSTL4     | 8,809996 | 5,71E-07 |
| BLNK      | 8,802171 | 1,02E-05 |
| DNAH3     | 8,793318 | 4,92E-07 |
| LINC00992 | 8,793057 | 3,64E-07 |
| CXXC4     | 8,791314 | 4,41E-07 |
| NRG3      | 8,782026 | 6,01E-07 |
| ZNF467    | 8,768198 | 1,87E-44 |
| PCAT7     | 8,766369 | 3,65E-07 |
| TUB       | 8,759854 | 3,78E-07 |

|            |          |          |
|------------|----------|----------|
| PTCHD2     | 8,759753 | 2,01E-06 |
| GNG13      | 8,747119 | 1,16E-06 |
| C1orf210   | 8,735275 | 8,31E-07 |
| LINC00858  | 8,718416 | 1,26E-06 |
| GSG1L      | 8,713328 | 5,24E-07 |
| KLHDC9     | 8,705142 | 5,81E-07 |
| PGM5       | 8,704737 | 8,23E-07 |
| H2AFY2     | 8,704398 | 4,25E-50 |
| FAM110C    | 8,698379 | 3,11E-06 |
| SLC22A17   | 8,696749 | 5,80E-07 |
| CRABP1     | 8,688865 | 1,84E-06 |
| ZMAT1      | 8,6844   | 1,76E-05 |
| SPSB4      | 8,678932 | 1,34E-06 |
| LINC01132  | 8,67671  | 3,48E-06 |
| FAM83B     | 8,66518  | 6,36E-21 |
| ESR1       | 8,664982 | 0,000227 |
| SOWAHB     | 8,660432 | 7,81E-07 |
| GRIK3      | 8,649132 | 3,38E-06 |
| HOXC13-AS1 | 8,636514 | 9,77E-07 |
| LOC100996  | 8,636243 | 9,78E-07 |
| S100A9     | 8,632312 | 0,000146 |
| TNFRSF18   | 8,622678 | 6,42E-06 |
| HTR2C      | 8,621764 | 8,11E-07 |
| SLC2A4     | 8,596062 | 1,01E-06 |
| CNNM1      | 8,587668 | 9,39E-07 |
| RADIL      | 8,584878 | 3,78E-06 |
| PCDHA5     | 8,583658 | 9,98E-07 |
| NPDC1      | 8,581063 | 3,46E-12 |
| LRP2       | 8,578604 | 9,36E-05 |
| CERS6      | 8,574557 | 4,48E-55 |
| LOC100288  | 8,573547 | 1,23E-06 |
| KCNMB2-A   | 8,571721 | 1,02E-06 |
| TERT       | 8,568882 | 4,44E-06 |
| SNCAIP     | 8,566004 | 1,06E-06 |
| KCNV1      | 8,565895 | 3,74E-06 |
| PLA2G3     | 8,565589 | 7,95E-06 |
| METTL7A    | 8,559011 | 4,24E-06 |
| ACE        | 8,537557 | 5,95E-06 |
| SERPINB5   | 8,534566 | 2,74E-05 |
| TMPRSS4    | 8,524818 | 2,24E-06 |
| INPP5D     | 8,509441 | 0,000109 |
| MPPED2     | 8,507409 | 5,57E-06 |
| EDAR       | 8,502445 | 5,53E-06 |
| TPTE       | 8,501247 | 1,71E-06 |
| LOC644915  | 8,487253 | 2,44E-06 |
| ANXA9      | 8,484291 | 9,08E-17 |
| FLT4       | 8,4839   | 5,93E-06 |
| DSCAM      | 8,482368 | 4,49E-06 |
| ADAMTS19   | 8,481411 | 1,72E-06 |
| RAB11FIP4  | 8,480488 | 9,02E-37 |

|           |          |          |
|-----------|----------|----------|
| TENM1     | 8,460122 | 3,34E-06 |
| STMND1    | 8,458081 | 2,03E-06 |
| PVRL4     | 8,450129 | 3,87E-19 |
| MARK1     | 8,448374 | 2,26E-05 |
| C19orf81  | 8,431728 | 2,16E-06 |
| KRT23     | 8,427986 | 2,17E-06 |
| SEMA3D    | 8,426853 | 7,35E-06 |
| LINC00664 | 8,423848 | 4,80E-06 |
| FRMPD1    | 8,417716 | 2,67E-06 |
| CCDC83    | 8,416124 | 3,84E-06 |
| PCDHA13   | 8,414683 | 2,47E-06 |
| KCNN2     | 8,407571 | 2,40E-06 |
| C4orf19   | 8,392872 | 3,20E-06 |
| ADAMTSL5  | 8,375062 | 3,23E-06 |
| TMEM139   | 8,357632 | 6,45E-06 |
| GOLT1A    | 8,353735 | 3,07E-08 |
| SPATA17   | 8,325901 | 2,88E-13 |
| DACH1     | 8,321702 | 3,74E-06 |
| LOC728735 | 8,321603 | 4,19E-06 |
| FAM81B    | 8,29645  | 6,14E-06 |
| TLE2      | 8,282682 | 1,90E-28 |
| SUSD2     | 8,279066 | 1,77E-09 |
| ZIC4      | 8,267616 | 5,05E-06 |
| AK7       | 8,261966 | 3,15E-05 |
| PCDH19    | 8,255853 | 1,17E-05 |
| VAX2      | 8,254919 | 6,46E-06 |
| PDZRN3    | 8,252642 | 5,31E-06 |
| MYO7A     | 8,246231 | 5,49E-06 |
| FAM83E    | 8,237969 | 1,43E-05 |
| CYP1A1    | 8,229605 | 5,86E-10 |
| LOC100128 | 8,218728 | 6,42E-06 |
| GLS2      | 8,209653 | 6,43E-08 |
| RFTN2     | 8,207418 | 1,19E-05 |
| WNT6      | 8,1951   | 7,05E-06 |
| C12orf56  | 8,190084 | 7,89E-08 |
| TMEM132F  | 8,186127 | 0,000374 |
| RAI2      | 8,184203 | 1,44E-05 |
| EDA       | 8,163528 | 8,29E-06 |
| SESN3     | 8,161599 | 4,21E-11 |
| TTC29     | 8,16056  | 8,96E-06 |
| MPP2      | 8,154055 | 3,19E-07 |
| SLC22A11  | 8,133476 | 4,48E-05 |
| PVALB     | 8,128652 | 3,07E-05 |
| ATP2C2    | 8,127678 | 2,31E-37 |
| CES3      | 8,125198 | 1,32E-05 |
| XKRX      | 8,123033 | 2,11E-05 |
| TCHHL1    | 8,121114 | 0,000558 |
| NMUR2     | 8,117267 | 1,08E-05 |
| PCDH18    | 8,116304 | 3,29E-18 |
| ITGA2B    | 8,109182 | 4,46E-07 |

|           |          |           |
|-----------|----------|-----------|
| FAM95C    | 8,108635 | 1,17E-05  |
| ACBD7     | 8,108509 | 2,25E-12  |
| ZNF613    | 8,075791 | 1,34E-05  |
| IGFL1     | 8,064333 | 0,000539  |
| SNAR-E    | 8,057571 | 3,37E-05  |
| KIAA0319  | 8,057478 | 2,85E-05  |
| NODAL     | 8,045129 | 2,81E-05  |
| WIF1      | 8,034056 | 0,000108  |
| LYPD6     | 8,031415 | 1,83E-07  |
| RIPPLY3   | 8,030678 | 1,70E-05  |
| LOC102723 | 8,028991 | 1,78E-05  |
| SLC6A14   | 8,021629 | 1,84E-05  |
| KCNH3     | 8,019082 | 1,76E-05  |
| PRLR      | 8,002006 | 4,00E-32  |
| FAM196A   | 7,997608 | 6,90E-05  |
| SCD5      | 7,996059 | 2,16E-16  |
| TRPM2-AS  | 7,98075  | 2,04E-05  |
| ZNF98     | 7,970014 | 4,37E-05  |
| HIST1H2BH | 7,964349 | 2,47E-05  |
| LINC00649 | 7,95993  | 2,31E-05  |
| MYO15B    | 7,952081 | 2,59E-05  |
| HS6ST3    | 7,946601 | 2,79E-05  |
| CKMT1A    | 7,945939 | 6,97E-21  |
| PCDHB6    | 7,932089 | 4,20E-07  |
| TARP      | 7,929655 | 0,000127  |
| F7        | 7,924704 | 0,000112  |
| TBC1D30   | 7,919083 | 3,39E-65  |
| ATP2A3    | 7,91755  | 6,46E-06  |
| KLHL35    | 7,904701 | 3,34E-05  |
| FAR2      | 7,873114 | 1,15E-24  |
| PART1     | 7,870717 | 4,40E-05  |
| SLC16A10  | 7,867742 | 3,56E-05  |
| HOXC13    | 7,864382 | 5,23E-15  |
| NKX6-1    | 7,861121 | 4,21E-05  |
| LOC100996 | 7,857308 | 4,90E-05  |
| PRR36     | 7,853714 | 3,61E-116 |
| FLT3      | 7,843298 | 3,98E-05  |
| ZNF492    | 7,841094 | 1,85E-06  |
| TRPV6     | 7,839458 | 4,26E-05  |
| FAM117A   | 7,831434 | 2,05E-19  |
| MIR4458H  | 7,815645 | 5,06E-05  |
| MPZL2     | 7,806334 | 3,38E-10  |
| FOXI3     | 7,803027 | 5,46E-05  |
| PLEKHB1   | 7,783899 | 5,57E-10  |
| HIST1H3G  | 7,760431 | 6,28E-05  |
| GHR       | 7,758397 | 6,12E-05  |
| CDH18     | 7,755186 | 7,27E-05  |
| IGSF11    | 7,739097 | 6,44E-05  |
| TTYH1     | 7,732668 | 0,00029   |
| XKR7      | 7,706455 | 0,000146  |

|           |          |           |
|-----------|----------|-----------|
| LOC100495 | 7,703927 | 8,30E-05  |
| KIF1A     | 7,701857 | 2,95E-32  |
| SLC52A1   | 7,701503 | 0,000268  |
| MGC32805  | 7,700419 | 0,00025   |
| NPY1R     | 7,696399 | 9,07E-23  |
| STK31     | 7,686371 | 0,000121  |
| GATA3-AS1 | 7,679904 | 9,90E-05  |
| LAMC3     | 7,635508 | 0,000107  |
| PCDHB13   | 7,635282 | 2,29E-14  |
| TMEM105   | 7,631475 | 0,000183  |
| LOC440461 | 7,621685 | 0,000252  |
| ARL11     | 7,619124 | 0,000124  |
| ICOS      | 7,616717 | 0,000125  |
| MIR4720   | 7,616464 | 0,000498  |
| NRARP     | 7,610288 | 2,50E-06  |
| EMCN      | 7,605789 | 0,000137  |
| BMP7      | 7,605634 | 3,15E-206 |
| PCDHAC1   | 7,604953 | 0,000248  |
| LINC00885 | 7,603152 | 0,000614  |
| POTEF     | 7,590039 | 0,000145  |
| EWSAT1    | 7,588461 | 0,00023   |
| IGSF1     | 7,587363 | 0,000638  |
| KCNF1     | 7,582982 | 0,000159  |
| GSC       | 7,577927 | 0,00045   |
| ASAH2     | 7,575202 | 8,09E-15  |
| LRRC10B   | 7,571337 | 0,000273  |
| NXPH3     | 7,56973  | 0,000232  |
| DLG2      | 7,568322 | 0,000143  |
| ATP8A1    | 7,565042 | 0,000195  |
| GPM6B     | 7,54746  | 0,000154  |
| KCNU1     | 7,540378 | 0,000174  |
| TFF3      | 7,533683 | 1,04E-09  |
| TDGF1     | 7,526115 | 0,000981  |
| ALG1L     | 7,523868 | 3,19E-16  |
| SEPP1     | 7,519956 | 0,000633  |
| CYP4F22   | 7,51708  | 0,000237  |
| VAV3      | 7,512661 | 1,31E-44  |
| GJB5      | 7,508207 | 0,000928  |
| CALML5    | 7,507674 | 0,000327  |
| CCSER1    | 7,503569 | 0,000234  |
| NRK       | 7,503225 | 0,000658  |
| CACNA2D2  | 7,485417 | 0,000269  |
| TLX1NB    | 7,483169 | 0,000206  |
| ZNF853    | 7,482133 | 0,000255  |
| UCP2      | 7,482108 | 3,69E-12  |
| CD36      | 7,461541 | 0,000474  |
| MISP      | 7,458585 | 1,78E-30  |
| NDNF      | 7,449916 | 0,000238  |
| MARVELD3  | 7,449304 | 4,23E-24  |
| ASIC1     | 7,447499 | 1,87E-08  |

|           |          |          |
|-----------|----------|----------|
| C8orf48   | 7,446323 | 0,000278 |
| ARHGEF38  | 7,435964 | 0,00033  |
| CAPN9     | 7,42082  | 0,000332 |
| LOC441666 | 7,414795 | 0,000343 |
| DEFB126   | 7,41459  | 0,000278 |
| VANGL2    | 7,408307 | 0,000302 |
| SNAR-G1   | 7,399427 | 0,00039  |
| OXGR1     | 7,383426 | 0,000426 |
| PKIB      | 7,383362 | 3,30E-54 |
| NPTX1     | 7,378993 | 0,000831 |
| RIMS4     | 7,373767 | 1,30E-13 |
| CELF3     | 7,368203 | 0,000518 |
| ADIRF     | 7,339199 | 0,000436 |
| WNT9A     | 7,332159 | 0,000605 |
| IBSP      | 7,323665 | 0,000416 |
| SLC5A5    | 7,321496 | 0,000896 |
| GRID2IP   | 7,312824 | 0,000424 |
| IGSF5     | 7,310567 | 8,26E-06 |
| CEACAM5   | 7,303705 | 0,001005 |
| KCNJ4     | 7,301908 | 0,000485 |
| OVOL1     | 7,30019  | 1,65E-16 |
| URAHP     | 7,297494 | 0,000536 |
| PARM1     | 7,293774 | 0,000674 |
| ZNF350    | 7,292806 | 5,45E-09 |
| TMC5      | 7,288107 | 2,56E-12 |
| NAP1L2    | 7,281376 | 0,000931 |
| RGMA      | 7,274685 | 5,94E-15 |
| C19orf45  | 7,272505 | 0,000499 |
| PLIN5     | 7,26845  | 0,000614 |
| CA4       | 7,258167 | 0,000656 |
| SRRM2-AS1 | 7,255796 | 0,000791 |
| GRTP1     | 7,248506 | 2,05E-18 |
| MYH10     | 7,239945 | 3,66E-06 |
| TIMP3     | 7,236697 | 8,33E-09 |
| PDE9A     | 7,219836 | 1,27E-05 |
| PRKG2     | 7,210574 | 0,000652 |
| NPW       | 7,204505 | 1,13E-05 |
| HUNK      | 7,199516 | 7,61E-31 |
| ZNF385C   | 7,183095 | 1,25E-05 |
| NMNAT3    | 7,177669 | 0,000957 |
| KDF1      | 7,15215  | 4,89E-23 |
| KIAA1257  | 7,147947 | 2,08E-05 |
| ZNF793-AS | 7,136727 | 0,000861 |
| RAP1GAP2  | 7,135852 | 5,02E-35 |
| EVPL      | 7,119684 | 8,46E-68 |
| FA2H      | 7,082957 | 5,54E-09 |
| SLC9A4    | 7,05969  | 2,05E-07 |
| YBX2      | 7,056466 | 2,27E-66 |
| WNT11     | 7,023685 | 2,16E-10 |
| MYLIP     | 7,016305 | 3,24E-42 |

|           |          |           |
|-----------|----------|-----------|
| DEF6      | 7,008592 | 1,49E-11  |
| MUC3A     | 7,002574 | 3,70E-05  |
| SYNE4     | 6,991769 | 5,37E-36  |
| PPL       | 6,981754 | 6,31E-59  |
| TMEM254-  | 6,975341 | 1,75E-07  |
| KRT19     | 6,963958 | 4,10E-86  |
| CLDN3     | 6,960838 | 7,19E-62  |
| SCN4A     | 6,957427 | 5,69E-12  |
| CLDN7     | 6,953666 | 5,04E-115 |
| IL17RB    | 6,895841 | 3,40E-10  |
| SHF       | 6,85221  | 3,62E-10  |
| PLEKHG6   | 6,848796 | 7,65E-14  |
| RAB26     | 6,831142 | 3,18E-10  |
| FRAT1     | 6,826997 | 6,35E-05  |
| FIRRE     | 6,814962 | 1,16E-06  |
| TUBA3D    | 6,806951 | 5,46E-07  |
| FAM83G    | 6,80323  | 1,65E-33  |
| NAT8L     | 6,793479 | 4,11E-31  |
| PALM      | 6,778632 | 3,36E-21  |
| PADI2     | 6,76915  | 2,01E-07  |
| MAPT      | 6,762347 | 2,12E-36  |
| UPK2      | 6,738369 | 4,21E-07  |
| UNC5C     | 6,730906 | 0,000278  |
| KCNQ5     | 6,700083 | 0,000214  |
| ADSSL1    | 6,694036 | 1,30E-06  |
| FCGR1A    | 6,684635 | 6,99E-06  |
| NRXN2     | 6,684038 | 2,08E-18  |
| PRSS22    | 6,668443 | 7,10E-07  |
| MACC1     | 6,652126 | 1,88E-07  |
| PDE3B     | 6,6488   | 5,13E-14  |
| CRLF1     | 6,623011 | 4,88E-07  |
| DBNDD1    | 6,622369 | 1,08E-37  |
| LDHD      | 6,62224  | 4,71E-06  |
| PCDHB8    | 6,61743  | 2,15E-21  |
| B3GNT3    | 6,60778  | 3,37E-13  |
| RORC      | 6,575663 | 0,000232  |
| HIST1H2AC | 6,569431 | 0,0002    |
| PRSS8     | 6,567871 | 3,72E-111 |
| C2orf15   | 6,564041 | 1,13E-21  |
| DLGAP3    | 6,562335 | 1,15E-11  |
| KIAA1324  | 6,553657 | 1,50E-25  |
| FAM46C    | 6,551078 | 2,63E-13  |
| HPN       | 6,53984  | 1,19E-16  |
| ESRP1     | 6,500024 | 1,04E-107 |
| ENPP4     | 6,484821 | 1,89E-11  |
| AMIGO1    | 6,460151 | 1,02E-06  |
| GLDN      | 6,446814 | 0,000329  |
| TFAP2C    | 6,429285 | 8,06E-71  |
| IGSF9     | 6,423122 | 3,43E-98  |
| SLC22A31  | 6,422454 | 1,59E-06  |



|           |          |           |
|-----------|----------|-----------|
| RASAL1    | 6,402642 | 7,24E-06  |
| ITGB4     | 6,402459 | 3,87E-87  |
| KCNJ8     | 6,401005 | 4,08E-48  |
| SLAIN1    | 6,400853 | 5,35E-10  |
| COLCA1    | 6,398284 | 0,000438  |
| HPDL      | 6,36353  | 2,48E-12  |
| GPX2      | 6,35236  | 0,000433  |
| RNF150    | 6,337871 | 5,60E-06  |
| EPHB3     | 6,335718 | 1,23E-22  |
| CALCR     | 6,290504 | 1,14E-05  |
| GPC2      | 6,285325 | 6,04E-11  |
| C2CD4C    | 6,274163 | 0,000834  |
| FUT9      | 6,260379 | 5,44E-08  |
| FCHO1     | 6,244449 | 2,10E-68  |
| CD8A      | 6,243818 | 6,32E-08  |
| KCNJ3     | 6,209144 | 5,82E-08  |
| MYB       | 6,200487 | 2,50E-09  |
| STK26     | 6,174214 | 1,01E-47  |
| HTR6      | 6,148404 | 0,000885  |
| SLC7A8    | 6,137788 | 4,92E-22  |
| RHOV      | 6,137754 | 1,10E-23  |
| SFN       | 6,131731 | 3,36E-61  |
| GRHL3     | 6,130752 | 4,10E-26  |
| CACNA1H   | 6,120562 | 4,96E-55  |
| LRRC37A8F | 6,100995 | 1,08E-05  |
| LODC1     | 6,072222 | 5,29E-75  |
| GSTO2     | 6,061528 | 6,25E-37  |
| GREB1     | 6,054238 | 9,36E-35  |
| RASGRF1   | 6,048602 | 4,17E-25  |
| FAM174B   | 6,039983 | 1,26E-20  |
| DLX4      | 6,019329 | 1,23E-05  |
| FGD3      | 6,015655 | 4,43E-17  |
| ST14      | 6,00813  | 2,70E-63  |
| EPPK1     | 5,992505 | 1,97E-26  |
| CALHM2    | 5,98076  | 3,28E-15  |
| FBXO15    | 5,958603 | 2,60E-05  |
| SLC30A3   | 5,956975 | 3,66E-05  |
| MYO1D     | 5,927141 | 7,10E-49  |
| LYPD3     | 5,92403  | 6,39E-23  |
| TACSTD2   | 5,900003 | 3,92E-75  |
| CKMT1B    | 5,894785 | 4,55E-29  |
| TEX15     | 5,872006 | 4,93E-09  |
| SYT7      | 5,843926 | 5,41E-101 |
| ALDH3A1   | 5,782161 | 0,000184  |
| ACTG2     | 5,763303 | 8,44E-06  |
| SLC27A5   | 5,757769 | 3,87E-32  |
| WDR72     | 5,743129 | 1,40E-19  |
| HOXD12    | 5,738307 | 0,000887  |
| SYT1      | 5,726794 | 2,69E-20  |
| CNTNAP2   | 5,719705 | 1,23E-10  |

|           |          |           |
|-----------|----------|-----------|
| LINC00052 | 5,719585 | 8,73E-09  |
| JUP       | 5,705703 | 4,95E-48  |
| ENTPD1    | 5,678805 | 2,29E-11  |
| PLD6      | 5,673847 | 3,17E-20  |
| CADM4     | 5,638491 | 1,73E-31  |
| AIF1L     | 5,635415 | 2,71E-86  |
| C2CD4D    | 5,632863 | 0,000329  |
| TM7SF2    | 5,628177 | 5,36E-35  |
| ADRA2C    | 5,621313 | 2,07E-37  |
| TIAM1     | 5,619338 | 8,64E-07  |
| ALDH6A1   | 5,619078 | 7,69E-42  |
| PROM2     | 5,602315 | 7,56E-24  |
| NSUN7     | 5,594387 | 1,87E-11  |
| FAM171A2  | 5,578442 | 6,49E-45  |
| SLC9A2    | 5,568993 | 2,45E-68  |
| MATK      | 5,562463 | 1,82E-57  |
| C1orf115  | 5,547056 | 2,40E-15  |
| HLA-DRB5  | 5,543358 | 0,00039   |
| LLGL2     | 5,538    | 3,33E-92  |
| RSPH1     | 5,515934 | 1,32E-05  |
| SYTL4     | 5,513617 | 1,12E-05  |
| FAM83H-A  | 5,499665 | 5,32E-54  |
| BCAS3     | 5,498152 | 8,67E-76  |
| PCDHA7    | 5,46731  | 2,93E-07  |
| SLC15A2   | 5,465479 | 7,51E-05  |
| BGN       | 5,427068 | 0,000132  |
| KRT18     | 5,42308  | 6,89E-48  |
| TUBD1     | 5,416469 | 4,88E-45  |
| TMC4      | 5,412348 | 7,29E-29  |
| GATSL2    | 5,407112 | 4,60E-60  |
| TOX2      | 5,384028 | 3,81E-11  |
| LOC11323C | 5,383386 | 7,07E-23  |
| CCDC3     | 5,378616 | 0,001003  |
| TEX14     | 5,374436 | 0,000322  |
| FOXO4     | 5,366722 | 0,000513  |
| ZFP14     | 5,36657  | 4,39E-16  |
| ZNF711    | 5,361319 | 1,46E-18  |
| GAMT      | 5,352391 | 1,41E-25  |
| ZSWIM5    | 5,350294 | 1,61E-07  |
| NEURL1B   | 5,344856 | 4,39E-24  |
| ABAT      | 5,337216 | 4,52E-14  |
| SEMA6B    | 5,315315 | 1,10E-17  |
| LRRC73    | 5,313704 | 2,46E-09  |
| UNC5A     | 5,313405 | 0,000813  |
| CBX2      | 5,294903 | 5,74E-100 |
| TINCR     | 5,286307 | 4,98E-13  |
| ADGRB1    | 5,279603 | 9,76E-24  |
| REEP6     | 5,264875 | 4,08E-41  |
| ELOVL4    | 5,264289 | 0,000313  |
| CHDH      | 5,26392  | 6,60E-14  |

|           |          |           |
|-----------|----------|-----------|
| KCNC3     | 5,25792  | 2,87E-33  |
| NKD1      | 5,250168 | 3,40E-59  |
| GNG7      | 5,242476 | 1,40E-07  |
| ATP1A3    | 5,200715 | 6,61E-18  |
| MAP2K6    | 5,200068 | 2,27E-09  |
| CGN       | 5,188384 | 1,56E-56  |
| FZD9      | 5,18477  | 1,02E-05  |
| TFAP2A    | 5,17402  | 4,02E-131 |
| SYTL1     | 5,170581 | 1,26E-26  |
| ADGRL1    | 5,13893  | 4,49E-105 |
| MALRD1    | 5,1299   | 4,52E-05  |
| FLRT3     | 5,12521  | 3,21E-41  |
| KYNU      | 5,118848 | 6,46E-23  |
| VAV1      | 5,112282 | 8,27E-11  |
| MBNL3     | 5,089653 | 1,94E-56  |
| GPLD1     | 5,082525 | 2,06E-05  |
| BCL11B    | 5,068808 | 5,28E-48  |
| SP6       | 5,06322  | 1,24E-32  |
| TMEM52    | 5,049082 | 7,26E-08  |
| PPM1D     | 5,043954 | 6,33E-90  |
| TMEM121   | 5,028557 | 1,56E-06  |
| ADGRV1    | 5,011908 | 6,55E-05  |
| LINC01006 | 5,009341 | 0,000114  |
| B3GALT4   | 5,009023 | 1,85E-05  |
| C1orf226  | 5,001692 | 1,27E-07  |
| ETNK2     | 4,99316  | 4,35E-27  |
| LOC283335 | 4,9891   | 7,06E-13  |
| AKR1E2    | 4,978732 | 8,77E-08  |
| KRT86     | 4,966228 | 0,000316  |
| RTN1      | 4,952543 | 0,000827  |
| RAPGEF5   | 4,949417 | 0,001006  |
| CDC42BPG  | 4,945263 | 4,98E-19  |
| ADAM22    | 4,943616 | 3,50E-12  |
| RPRM      | 4,926919 | 1,39E-05  |
| HCN4      | 4,909942 | 1,89E-07  |
| CEACAM1   | 4,907804 | 2,95E-12  |
| ATP6V0E2  | 4,898355 | 3,58E-42  |
| LMO2      | 4,874094 | 0,000486  |
| C17orf97  | 4,866706 | 7,47E-17  |
| FGFR3     | 4,860981 | 1,36E-17  |
| RCN3      | 4,857763 | 0,000301  |
| CACFD1    | 4,853187 | 2,88E-13  |
| B4GALNT4  | 4,849504 | 1,51E-24  |
| DHRS2     | 4,847815 | 5,12E-23  |
| METTTL7B  | 4,843293 | 0,000104  |
| RAB17     | 4,842643 | 2,81E-14  |
| KLHL13    | 4,839232 | 1,16E-08  |
| FAM178B   | 4,82877  | 0,000904  |
| HSD11B2   | 4,827987 | 7,14E-11  |
| TMEM229E  | 4,818356 | 4,36E-13  |

|           |          |           |
|-----------|----------|-----------|
| ILDR1     | 4,814599 | 3,99E-21  |
| EPCAM     | 4,810609 | 1,19E-102 |
| FDXR      | 4,79753  | 7,03E-18  |
| KREMEN2   | 4,793282 | 2,21E-54  |
| FAM222A   | 4,779299 | 5,53E-42  |
| COBL      | 4,750235 | 2,77E-20  |
| BATF      | 4,722619 | 7,86E-09  |
| SOX2      | 4,715705 | 9,30E-13  |
| AKR1C2    | 4,710315 | 5,69E-09  |
| SLC45A4   | 4,704796 | 3,72E-18  |
| DYNC1I1   | 4,704233 | 1,57E-31  |
| MEST      | 4,703507 | 1,10E-107 |
| TLCD1     | 4,69639  | 1,06E-52  |
| SHH       | 4,685144 | 1,29E-06  |
| AP4B1-AS1 | 4,682127 | 2,45E-13  |
| SLC7A2    | 4,674546 | 1,11E-33  |
| MEX3A     | 4,671064 | 2,80E-121 |
| C1orf233  | 4,663559 | 1,47E-40  |
| NOTUM     | 4,645438 | 7,20E-13  |
| SLC4A8    | 4,643012 | 3,09E-08  |
| EEF1A2    | 4,626863 | 1,99E-54  |
| RHPN1     | 4,61842  | 1,66E-32  |
| BRIP1     | 4,587243 | 8,39E-70  |
| JAG2      | 4,568022 | 2,19E-29  |
| CNIH2     | 4,565897 | 8,49E-15  |
| DNAAF3    | 4,556084 | 4,92E-22  |
| FLJ10038  | 4,551074 | 2,39E-18  |
| TESC      | 4,545337 | 0,000782  |
| ZCCHC12   | 4,544474 | 5,97E-06  |
| NEB       | 4,540066 | 1,46E-32  |
| CLMN      | 4,533954 | 1,58E-25  |
| MARC1     | 4,520978 | 1,68E-36  |
| FAM69B    | 4,494782 | 3,43E-07  |
| RPS6KB1   | 4,491079 | 2,70E-117 |
| ARL15     | 4,490302 | 1,82E-09  |
| CNFN      | 4,483039 | 0,000303  |
| ZDHHC23   | 4,477086 | 1,22E-16  |
| ARTN      | 4,476726 | 6,50E-05  |
| LHX4      | 4,463645 | 2,83E-34  |
| SLC29A2   | 4,460179 | 1,38E-35  |
| SCAMP5    | 4,453413 | 1,05E-17  |
| SORT1     | 4,437623 | 2,74E-36  |
| ALDH5A1   | 4,430792 | 9,59E-39  |
| FAM213A   | 4,425294 | 3,71E-41  |
| TP53TG1   | 4,421458 | 5,36E-27  |
| DHTKD1    | 4,418975 | 7,07E-71  |
| ZNF497    | 4,417796 | 3,67E-10  |
| CREB3L4   | 4,416843 | 6,49E-16  |
| PTPN6     | 4,416448 | 5,04E-10  |
| TRIM37    | 4,403863 | 1,13E-125 |

|           |          |           |
|-----------|----------|-----------|
| AXIN2     | 4,402852 | 7,10E-90  |
| ZNF385A   | 4,400757 | 2,27E-66  |
| GREB1L    | 4,396537 | 0,000601  |
| ALDH3A2   | 4,388437 | 1,63E-83  |
| LINC01003 | 4,380055 | 2,52E-07  |
| PCDHGB2   | 4,378987 | 0,000165  |
| FRMD6-AS1 | 4,360294 | 7,87E-06  |
| PRRT4     | 4,34984  | 0,000115  |
| CAMK2B    | 4,344628 | 6,27E-11  |
| L2HGDH    | 4,312912 | 2,61E-34  |
| SMPDL3B   | 4,304967 | 1,03E-36  |
| TMEM97    | 4,304326 | 4,77E-65  |
| ZNF879    | 4,301368 | 4,09E-06  |
| CA11      | 4,280363 | 5,75E-06  |
| PREX1     | 4,277033 | 1,65E-51  |
| CELF5     | 4,27689  | 7,03E-06  |
| ERV3-1    | 4,259793 | 1,60E-22  |
| APPBP2    | 4,259401 | 3,15E-112 |
| DTX3      | 4,247482 | 7,21E-27  |
| EHF       | 4,239268 | 0,00025   |
| LRFN1     | 4,237592 | 1,73E-08  |
| USP32     | 4,230191 | 2,43E-43  |
| EFHD1     | 4,226231 | 3,63E-12  |
| KRTCAP3   | 4,224448 | 4,84E-20  |
| PRDM6     | 4,221887 | 4,40E-07  |
| LYRM9     | 4,218861 | 7,43E-08  |
| BDH1      | 4,218031 | 1,33E-54  |
| MTL5      | 4,215757 | 6,80E-18  |
| HEATR6    | 4,200054 | 8,91E-75  |
| RMI2      | 4,197429 | 5,05E-28  |
| FAM171B   | 4,193317 | 3,16E-23  |
| RHOBTB1   | 4,193118 | 1,03E-80  |
| HOOK1     | 4,18456  | 7,00E-16  |
| PCDH7     | 4,176863 | 9,84E-09  |
| ADAMTS13  | 4,171878 | 2,56E-05  |
| BCAS1     | 4,167976 | 1,81E-05  |
| MTMR4     | 4,154596 | 4,44E-61  |
| CPT1C     | 4,15065  | 1,75E-05  |
| DHFRL1    | 4,148432 | 6,95E-15  |
| ADAM11    | 4,146964 | 5,24E-07  |
| SP5       | 4,142276 | 1,27E-39  |
| LINC00925 | 4,137209 | 6,42E-08  |
| TNRC6C    | 4,133269 | 2,28E-49  |
| FOXA1     | 4,131224 | 3,72E-88  |
| NDRG2     | 4,129026 | 1,88E-14  |
| KBTBD7    | 4,119314 | 6,97E-11  |
| RAD51C    | 4,115075 | 4,55E-74  |
| ELMO3     | 4,100785 | 3,30E-41  |
| ARHGAP39  | 4,089179 | 2,94E-27  |
| CRMP1     | 4,070618 | 5,53E-08  |

|             |          |          |
|-------------|----------|----------|
| SIM2        | 4,059076 | 0,000649 |
| PODXL2      | 4,054086 | 4,05E-48 |
| SIX4        | 4,053182 | 1,59E-24 |
| CYP1B1      | 4,041483 | 1,79E-05 |
| CTSF        | 4,03573  | 6,63E-08 |
| PRKCZ       | 4,027294 | 2,14E-28 |
| SLC26A4-A'  | 4,01697  | 6,54E-10 |
| CXADR       | 4,01587  | 7,71E-20 |
| PRICKLE2-A' | 3,998501 | 4,43E-05 |
| ASH1L-AS1   | 3,992103 | 0,000918 |
| IQCH-AS1    | 3,987963 | 3,51E-15 |
| FAM227B     | 3,98745  | 4,94E-05 |
| HIST2H2BE   | 3,986552 | 3,27E-13 |
| CLU         | 3,970964 | 2,11E-24 |
| EFR3B       | 3,962512 | 4,70E-19 |
| JMY         | 3,953759 | 3,02E-10 |
| GAA         | 3,936595 | 4,89E-34 |
| COLEC12     | 3,924531 | 1,19E-14 |
| EFNA4       | 3,915648 | 1,97E-19 |
| VASH2       | 3,912098 | 4,44E-07 |
| ADGRE2      | 3,910704 | 6,79E-05 |
| CYP2J2      | 3,909647 | 1,27E-14 |
| PARD6B      | 3,902396 | 1,97E-28 |
| DCXR        | 3,888978 | 4,51E-38 |
| KNDC1       | 3,853255 | 9,21E-06 |
| BTG2        | 3,845164 | 1,01E-13 |
| PBXIP1      | 3,840873 | 4,79E-09 |
| FGFR2       | 3,833107 | 2,69E-05 |
| ZNF821      | 3,826942 | 7,86E-15 |
| IL17RE      | 3,813704 | 2,15E-06 |
| CGREF1      | 3,808037 | 2,96E-29 |
| DNMT3A      | 3,806559 | 4,39E-50 |
| LOC100506   | 3,79364  | 1,72E-09 |
| PRSS23      | 3,79134  | 5,38E-33 |
| CEMIP       | 3,78381  | 9,90E-15 |
| REEP1       | 3,771066 | 1,04E-05 |
| GALNT12     | 3,762374 | 1,17E-19 |
| ANKRD34A    | 3,757896 | 6,13E-14 |
| SPINT1      | 3,757106 | 5,84E-42 |
| HYKK        | 3,75374  | 3,35E-06 |
| DGKE        | 3,753429 | 8,41E-13 |
| TMEM191A    | 3,751327 | 1,14E-14 |
| RAC3        | 3,746616 | 2,75E-30 |
| FAM214A     | 3,725923 | 4,43E-10 |
| KCNK15      | 3,724737 | 1,72E-15 |
| ARHGEF4     | 3,724649 | 3,79E-05 |
| PRRT3       | 3,722094 | 8,93E-06 |
| FOXO6       | 3,717833 | 0,000375 |
| SRRM3       | 3,714597 | 0,000427 |
| MOCS1       | 3,711164 | 7,80E-09 |

|          |          |          |
|----------|----------|----------|
| PITPNC1  | 3,707705 | 9,00E-33 |
| BRSK1    | 3,693827 | 1,51E-10 |
| PCDHB16  | 3,688994 | 5,36E-17 |
| PXN-AS1  | 3,688119 | 1,03E-14 |
| TMEM187  | 3,672888 | 9,69E-13 |
| ACVR2B   | 3,67051  | 1,39E-10 |
| STARD10  | 3,667832 | 3,81E-23 |
| CNKS1    | 3,666537 | 0,000444 |
| PCDHB14  | 3,666126 | 1,80E-18 |
| AGAP2    | 3,665993 | 3,99E-17 |
| ICK      | 3,665751 | 1,68E-40 |
| CSPG5    | 3,665329 | 1,60E-08 |
| KRBA2    | 3,659739 | 4,20E-06 |
| PCDHB9   | 3,653752 | 1,23E-10 |
| FASN     | 3,65103  | 2,44E-24 |
| PTPRO    | 3,649014 | 3,60E-10 |
| MANSC1   | 3,639365 | 2,26E-09 |
| SPATA7   | 3,636598 | 5,33E-10 |
| OLFM2    | 3,636255 | 3,57E-26 |
| SLC46A3  | 3,634212 | 0,00019  |
| TEX9     | 3,633694 | 7,45E-10 |
| LONRF2   | 3,601273 | 6,48E-14 |
| PSMD6    | 3,600829 | 5,37E-63 |
| MAFB     | 3,598815 | 9,55E-14 |
| CPLX1    | 3,598445 | 7,25E-13 |
| IRF6     | 3,595374 | 5,35E-17 |
| FAM117B  | 3,594135 | 1,68E-22 |
| PCSK6    | 3,57954  | 1,73E-25 |
| PPFIBP2  | 3,55452  | 7,27E-14 |
| CTXN1    | 3,53785  | 2,15E-41 |
| ASCL5    | 3,529406 | 0,000433 |
| RGL2     | 3,52251  | 8,75E-23 |
| HOXC11   | 3,522415 | 7,48E-09 |
| NRGN     | 3,513856 | 2,18E-09 |
| HSD17B8  | 3,508756 | 4,00E-07 |
| YPEL1    | 3,507376 | 0,000684 |
| HSD17B7  | 3,499974 | 1,68E-09 |
| PPAPDC2  | 3,486642 | 4,95E-10 |
| SUSD3    | 3,477727 | 4,37E-07 |
| CFAP53   | 3,472445 | 0,000174 |
| FAM102B  | 3,470913 | 3,97E-38 |
| CASKIN1  | 3,462457 | 1,35E-12 |
| ASS1     | 3,460361 | 4,72E-18 |
| CACNA2D1 | 3,452833 | 2,70E-10 |
| MAP3K14- | 3,450185 | 1,93E-07 |
| DUSP9    | 3,448888 | 7,36E-09 |
| TSPAN15  | 3,446096 | 5,95E-18 |
| LRRC24   | 3,444403 | 1,34E-06 |
| ATP5S    | 3,430793 | 7,76E-12 |
| PLCH1    | 3,425678 | 3,83E-31 |

|           |          |          |
|-----------|----------|----------|
| EPHB4     | 3,419799 | 5,66E-68 |
| FAM72D    | 3,418325 | 7,10E-11 |
| XYLT1     | 3,41826  | 1,12E-08 |
| C4orf48   | 3,411681 | 1,84E-15 |
| FBXL16    | 3,409745 | 2,37E-12 |
| BOLA1     | 3,404325 | 5,32E-20 |
| LOC101927 | 3,401406 | 6,34E-15 |
| PFDN4     | 3,394908 | 8,41E-63 |
| TSTD1     | 3,393185 | 1,19E-19 |
| P2RY6     | 3,386927 | 0,000331 |
| EFNA2     | 3,376858 | 0,000338 |
| TP53I11   | 3,373529 | 2,50E-34 |
| NKAIN1    | 3,371403 | 4,32E-17 |
| C2orf81   | 3,371363 | 1,90E-07 |
| FRAS1     | 3,364255 | 5,09E-20 |
| TET1      | 3,347367 | 1,39E-09 |
| GLUD2     | 3,33963  | 1,85E-08 |
| LMTK3     | 3,339602 | 1,64E-08 |
| CELSR3    | 3,331421 | 5,92E-19 |
| ZNF703    | 3,330719 | 3,72E-56 |
| ANKRD18A  | 3,32568  | 2,55E-05 |
| TTC25     | 3,325481 | 0,000569 |
| SUV420H2  | 3,323913 | 1,56E-19 |
| G6PD      | 3,317617 | 0,000743 |
| BCAM      | 3,308112 | 7,42E-28 |
| SFXN2     | 3,305444 | 5,15E-19 |
| SUOX      | 3,301373 | 7,00E-11 |
| CHRM3     | 3,301025 | 4,55E-05 |
| CRHR1-IT1 | 3,296608 | 0,000113 |
| SMIM14    | 3,294669 | 1,46E-06 |
| RNF44     | 3,294247 | 2,84E-44 |
| DOC2A     | 3,293501 | 3,18E-06 |
| KSR2      | 3,29055  | 8,55E-06 |
| NCOA3     | 3,285236 | 9,65E-45 |
| SOX4      | 3,283663 | 4,75E-40 |
| IGFLR1    | 3,279726 | 7,41E-08 |
| CDKN1A    | 3,277401 | 9,08E-11 |
| NANOS1    | 3,269817 | 3,74E-15 |
| ISYNA1    | 3,26653  | 2,02E-41 |
| THNSL1    | 3,265854 | 3,40E-16 |
| NUDT7     | 3,265024 | 0,000414 |
| TMTC2     | 3,255038 | 1,97E-09 |
| AP4S1     | 3,251664 | 2,26E-09 |
| UNC13D    | 3,249047 | 4,72E-05 |
| AP1M2     | 3,237128 | 3,01E-42 |
| EPHA6     | 3,236467 | 7,54E-08 |
| GDPD3     | 3,235521 | 0,000501 |
| SRCIN1    | 3,233343 | 0,000111 |
| C11orf71  | 3,230252 | 1,08E-05 |
| TBX2-AS1  | 3,228777 | 3,47E-05 |



|            |          |          |
|------------|----------|----------|
| NIPSNAP1   | 3,22665  | 3,32E-42 |
| DDIT4L     | 3,224486 | 1,19E-08 |
| C6orf52    | 3,220141 | 0,000286 |
| TKFC       | 3,218874 | 1,74E-20 |
| C17orf96   | 3,204066 | 1,77E-28 |
| ID1        | 3,199436 | 2,70E-14 |
| DHCR7      | 3,199255 | 9,36E-28 |
| RPRD1A     | 3,197652 | 2,89E-45 |
| POLG2      | 3,197056 | 3,14E-09 |
| NDRG4      | 3,196447 | 3,72E-07 |
| UFSP1      | 3,190312 | 1,16E-05 |
| KRT81      | 3,188341 | 0,000234 |
| ZBTB42     | 3,187639 | 4,45E-27 |
| THNSL2     | 3,185984 | 1,29E-10 |
| ALDH4A1    | 3,185943 | 3,72E-08 |
| XK         | 3,185405 | 0,000199 |
| PIK3C2B    | 3,183123 | 3,38E-28 |
| LENG9      | 3,174205 | 3,40E-10 |
| CCNG2      | 3,173829 | 1,57E-10 |
| PIK3R3     | 3,17162  | 8,09E-18 |
| AMZ2P1     | 3,16836  | 7,09E-07 |
| TP53INP1   | 3,164382 | 8,76E-07 |
| EFNA3      | 3,157236 | 1,98E-15 |
| FMO5       | 3,15639  | 0,000484 |
| PLEKHH1    | 3,155548 | 4,42E-24 |
| MAP7       | 3,151964 | 4,07E-33 |
| DYRK1B     | 3,150195 | 1,37E-22 |
| SAMD12     | 3,148388 | 1,58E-09 |
| SEPT3      | 3,139472 | 4,42E-14 |
| RAB30      | 3,110869 | 1,65E-17 |
| SEMA4G     | 3,109343 | 0,000366 |
| ZSCAN16    | 3,105809 | 7,79E-18 |
| IPO5P1     | 3,096521 | 9,47E-11 |
| TRAPPC6A   | 3,094219 | 5,34E-17 |
| MIR5047    | 3,090186 | 1,94E-05 |
| TDRKH      | 3,084433 | 6,42E-13 |
| TMC6       | 3,081516 | 7,17E-19 |
| ZNF253     | 3,071887 | 1,69E-26 |
| EXPH5      | 3,064038 | 6,75E-19 |
| ACADSB     | 3,056451 | 3,55E-12 |
| PROCA1     | 3,051769 | 0,000228 |
| SYNPO2     | 3,047143 | 8,21E-09 |
| ATXN7L3B   | 3,047066 | 1,75E-46 |
| DHRS13     | 3,040992 | 4,58E-10 |
| RALGPS1    | 3,03936  | 7,37E-12 |
| UNG        | 3,035691 | 2,25E-42 |
| HBP1       | 3,033918 | 1,04E-10 |
| ELL3       | 3,03273  | 5,19E-12 |
| GABPB1-AS1 | 3,03033  | 3,71E-09 |
| ZNF837     | 3,024929 | 6,62E-07 |

|           |          |          |
|-----------|----------|----------|
| ZBTB12    | 3,016013 | 6,14E-08 |
| SERINC5   | 3,011158 | 1,77E-18 |
| NUDT16L1  | 3,007989 | 6,03E-15 |
| HR        | 3,007782 | 5,49E-13 |
| SLC27A3   | 3,004443 | 4,46E-31 |
| DSP       | 2,990561 | 1,03E-45 |
| LIPT2     | 2,989156 | 0,000772 |
| SLC25A10  | 2,988291 | 1,99E-42 |
| ZNF287    | 2,986738 | 5,28E-09 |
| SORL1     | 2,982038 | 2,27E-09 |
| STOX1     | 2,970118 | 0,000122 |
| SOX13     | 2,968994 | 2,75E-14 |
| PARD6A    | 2,967669 | 0,000154 |
| ARID5B    | 2,964913 | 3,08E-27 |
| SH3YL1    | 2,964035 | 1,49E-22 |
| PCYOX1L   | 2,963953 | 1,44E-12 |
| GLUL      | 2,962135 | 2,22E-67 |
| HOOK2     | 2,959838 | 2,19E-41 |
| IFT140    | 2,955675 | 8,81E-07 |
| MTMR7     | 2,954551 | 0,000596 |
| ZNF19     | 2,948621 | 4,19E-05 |
| DDR1      | 2,948465 | 4,74E-13 |
| SMKR1     | 2,945895 | 3,37E-09 |
| FAM131A   | 2,94445  | 2,68E-06 |
| ZP3       | 2,940165 | 1,04E-14 |
| MDM2      | 2,934547 | 4,57E-14 |
| HCN2      | 2,934166 | 7,19E-10 |
| FRAT2     | 2,933956 | 4,20E-08 |
| PRMT6     | 2,933145 | 2,84E-46 |
| ZNF204P   | 2,931461 | 0,000205 |
| STRA13    | 2,930603 | 2,56E-33 |
| SYNGR1    | 2,928829 | 2,74E-05 |
| NIPBL-AS1 | 2,924041 | 3,29E-10 |
| TMEM38A   | 2,917689 | 1,39E-05 |
| C21orf33  | 2,916151 | 1,33E-22 |
| RGS6      | 2,912671 | 0,000232 |
| SLC29A4   | 2,911311 | 5,42E-14 |
| PLXDC2    | 2,910112 | 1,86E-15 |
| NUDT2     | 2,909024 | 6,32E-08 |
| MSI2      | 2,906011 | 8,89E-15 |
| FAM201A   | 2,905726 | 8,47E-05 |
| PDZD4     | 2,903828 | 1,27E-06 |
| FBXL20    | 2,898123 | 2,44E-06 |
| CCM2L     | 2,894093 | 9,03E-05 |
| PLEKHA7   | 2,892196 | 2,13E-21 |
| EFNA1     | 2,888585 | 1,33E-10 |
| CFAP44    | 2,888167 | 0,000979 |
| EMP2      | 2,884242 | 4,07E-18 |
| TRPS1     | 2,878529 | 8,96E-45 |
| ZNF721    | 2,878317 | 3,21E-25 |

|                      |          |          |
|----------------------|----------|----------|
| ATXN7L1              | 2,873738 | 3,04E-16 |
| ZNF652               | 2,865432 | 1,11E-25 |
| UNKL                 | 2,855208 | 2,71E-13 |
| GDF11                | 2,852826 | 2,71E-12 |
| ZNF217               | 2,847627 | 2,30E-53 |
| SCML2                | 2,847216 | 1,73E-08 |
| BFSP1                | 2,8465   | 2,57E-06 |
| MAML3                | 2,84633  | 6,72E-06 |
| ZNRF3                | 2,844808 | 5,69E-45 |
| SH3BP5               | 2,841552 | 3,89E-38 |
| ALKBH4               | 2,837539 | 2,00E-23 |
| DUSP2                | 2,834022 | 1,47E-05 |
| ADI1                 | 2,832865 | 3,56E-26 |
| SYNE2                | 2,831285 | 9,63E-19 |
| KAZALD1              | 2,830611 | 0,000222 |
| PAIP2B               | 2,824564 | 7,73E-08 |
| PXMP4                | 2,818698 | 6,25E-07 |
| MAN1A1               | 2,816276 | 4,30E-13 |
| FAM72A               | 2,806229 | 6,55E-05 |
| ATP6V1E2             | 2,791382 | 0,000327 |
| CFD                  | 2,788668 | 2,53E-06 |
| NMNAT2               | 2,784532 | 5,26E-06 |
| CYP24A1              | 2,783908 | 0,000214 |
| SARM1                | 2,782903 | 1,41E-06 |
| RNASEL               | 2,781734 | 3,36E-08 |
| SVIP                 | 2,778076 | 8,53E-13 |
| D2HGDH               | 2,777821 | 4,64E-16 |
| MEPCE                | 2,776305 | 1,56E-49 |
| ROGDI                | 2,767255 | 2,06E-10 |
| CCDC85C              | 2,753491 | 4,90E-36 |
| PSMG3-AS1            | 2,752711 | 2,28E-09 |
| CELSR2               | 2,745222 | 3,65E-27 |
| PRKAR2B              | 2,739588 | 1,97E-07 |
| PIF1                 | 2,733856 | 0,000109 |
| NUDT12               | 2,733451 | 8,16E-06 |
| DTWD1                | 2,732164 | 7,04E-18 |
| STARD5               | 2,725723 | 0,000257 |
| SMARCD2              | 2,715145 | 9,72E-36 |
| KDM5B                | 2,710088 | 2,25E-18 |
| ZNF815P              | 2,704942 | 0,00045  |
| FAAH                 | 2,698683 | 1,26E-12 |
| SLC46A1              | 2,695357 | 1,33E-13 |
| FZD3                 | 2,693712 | 1,73E-12 |
| FLJ37453             | 2,684489 | 7,16E-05 |
| FAM86C2P             | 2,683803 | 1,17E-06 |
| PEX1                 | 2,683396 | 6,25E-19 |
| CSDE1                | 2,676035 | 9,64E-31 |
| MCM3AP- <del>1</del> | 2,6751   | 2,22E-10 |
| PCDHB10              | 2,674175 | 0,000614 |
| FZD2                 | 2,67124  | 6,91E-13 |

|           |          |          |
|-----------|----------|----------|
| TRIM33    | 2,668185 | 4,95E-34 |
| E2F2      | 2,66477  | 2,05E-05 |
| INTS2     | 2,663598 | 4,99E-10 |
| JHDM1D-A  | 2,655123 | 3,31E-09 |
| MACROD1   | 2,653416 | 4,07E-14 |
| MPZL3     | 2,652744 | 8,95E-09 |
| LAMA5     | 2,650172 | 3,08E-32 |
| SIAE      | 2,649546 | 1,75E-09 |
| ADCY6     | 2,646084 | 5,08E-12 |
| EPHA10    | 2,644792 | 8,07E-05 |
| ZKSCAN1   | 2,640108 | 2,45E-24 |
| FAM46B    | 2,638257 | 7,81E-08 |
| CEBPA     | 2,635732 | 1,17E-06 |
| LAGE3     | 2,632313 | 6,27E-21 |
| C6orf226  | 2,630161 | 2,34E-05 |
| ZFP90     | 2,629165 | 1,33E-20 |
| C5        | 2,62631  | 1,64E-06 |
| ZNF595    | 2,625787 | 7,41E-14 |
| KIAA2018  | 2,610906 | 3,12E-13 |
| MXD4      | 2,608826 | 1,82E-09 |
| ACTR6     | 2,608781 | 3,40E-14 |
| ZNF397    | 2,604951 | 3,04E-07 |
| MKL2      | 2,603084 | 2,27E-23 |
| BTB       | 2,596648 | 0,000214 |
| FGFR4     | 2,591241 | 3,73E-13 |
| NHP2      | 2,580577 | 1,02E-42 |
| SLX4IP    | 2,578716 | 3,10E-05 |
| HOXC-AS3  | 2,577343 | 0,000414 |
| DANCR     | 2,577322 | 5,36E-19 |
| PTPRS     | 2,576965 | 1,98E-30 |
| FAM149B1  | 2,575786 | 2,22E-10 |
| KANSL1L   | 2,567684 | 2,34E-08 |
| RIMKLA    | 2,563227 | 0,000109 |
| LEF1      | 2,562536 | 2,21E-18 |
| MBTD1     | 2,558886 | 1,11E-11 |
| SPA17     | 2,55885  | 1,31E-07 |
| CCDC88C   | 2,556605 | 6,67E-13 |
| SLC29A3   | 2,555627 | 4,29E-09 |
| ZNF512B   | 2,554433 | 1,17E-21 |
| MCTS2P    | 2,553339 | 2,23E-08 |
| CCDC120   | 2,552838 | 2,59E-08 |
| TRIM41    | 2,550487 | 7,35E-25 |
| CRABP2    | 2,547083 | 1,28E-08 |
| DNPH1     | 2,546381 | 2,96E-33 |
| FAM212B   | 2,546327 | 1,03E-05 |
| LINC01004 | 2,541812 | 0,000377 |
| SPPL2A    | 2,53898  | 7,08E-29 |
| DOLPP1    | 2,537035 | 3,03E-13 |
| ZNF713    | 2,535318 | 9,65E-08 |
| SNX27     | 2,533902 | 1,20E-29 |

|            |          |          |
|------------|----------|----------|
| ZSCAN21    | 2,530847 | 1,91E-19 |
| TMEM238    | 2,530626 | 2,09E-06 |
| PDE4D      | 2,52708  | 2,63E-10 |
| USP30      | 2,525014 | 5,08E-11 |
| WNT10B     | 2,523555 | 0,000145 |
| GPR153     | 2,516307 | 2,60E-09 |
| TRIM24     | 2,516287 | 2,07E-31 |
| MIR600HG   | 2,515701 | 4,11E-06 |
| TMEM168    | 2,511042 | 8,79E-22 |
| SLC9A3R1   | 2,507766 | 3,35E-18 |
| VPS26B     | 2,504643 | 3,39E-11 |
| ALG10      | 2,500727 | 1,10E-05 |
| G2E3       | 2,49835  | 7,82E-15 |
| CYB561     | 2,483762 | 2,31E-40 |
| MARVELD2   | 2,482745 | 5,43E-11 |
| HMMR       | 2,479541 | 9,26E-15 |
| ABCB6      | 2,476358 | 3,57E-14 |
| FITM2      | 2,47524  | 9,96E-09 |
| WDR34      | 2,474593 | 2,72E-36 |
| OSBP2      | 2,470901 | 0,000133 |
| SECTM1     | 2,468875 | 2,61E-05 |
| ATOH8      | 2,46586  | 1,04E-05 |
| ZFP62      | 2,465664 | 4,28E-27 |
| PAXIP1-AS1 | 2,46563  | 2,16E-06 |
| DLGAP5     | 2,464704 | 7,50E-31 |
| PYGO2      | 2,462759 | 5,01E-25 |
| NUDT4      | 2,460376 | 2,82E-19 |
| DMXL2      | 2,458869 | 3,91E-27 |
| ATG10      | 2,457487 | 1,11E-06 |
| KIF27      | 2,455552 | 0,000181 |
| SLC39A11   | 2,451406 | 5,61E-08 |
| SEMA3F     | 2,451309 | 2,05E-15 |
| ERVMER34   | 2,449118 | 7,07E-05 |
| EARS2      | 2,448296 | 1,22E-25 |
| ZNF785     | 2,443504 | 1,11E-06 |
| SOBP       | 2,441052 | 0,00037  |
| RNFT2      | 2,44053  | 6,75E-05 |
| XPC        | 2,43871  | 5,96E-21 |
| ZNF138     | 2,436094 | 5,50E-10 |
| ZNF117     | 2,433573 | 4,17E-07 |
| OR7E14P    | 2,43311  | 0,000174 |
| DYNLL2     | 2,431858 | 9,11E-37 |
| OARD1      | 2,43043  | 2,44E-18 |
| TRIM45     | 2,4284   | 6,48E-08 |
| LOC90784   | 2,428161 | 5,74E-20 |
| SETMAR     | 2,425052 | 2,10E-14 |
| ZNF76      | 2,417117 | 2,09E-13 |
| FAM185A    | 2,414733 | 8,80E-09 |
| FAM172A    | 2,412629 | 5,45E-08 |
| PP7080     | 2,406461 | 8,47E-10 |

|          |          |          |
|----------|----------|----------|
| GSTA4    | 2,405666 | 3,27E-07 |
| ZNF687   | 2,403817 | 2,88E-34 |
| ZMYM2    | 2,399234 | 1,03E-30 |
| LRRC45   | 2,398548 | 1,30E-21 |
| ZBTB41   | 2,397348 | 5,85E-15 |
| ABCA2    | 2,393398 | 9,27E-15 |
| SNHG25   | 2,390219 | 2,02E-05 |
| DET1     | 2,386704 | 4,69E-05 |
| SYT12    | 2,380696 | 1,59E-08 |
| GOLPH3L  | 2,379669 | 2,48E-10 |
| SCRN2    | 2,376527 | 2,70E-05 |
| SLC12A9  | 2,375397 | 3,75E-09 |
| EPM2AIP1 | 2,372516 | 5,00E-11 |
| NBPF3    | 2,369725 | 3,93E-05 |
| TMEM256  | 2,36712  | 9,95E-06 |
| DCAF7    | 2,36482  | 1,03E-26 |
| ZNF48    | 2,35861  | 4,87E-08 |
| TMEM184  | 2,358176 | 2,15E-08 |
| ALPK1    | 2,356604 | 8,08E-05 |
| CLDN4    | 2,354052 | 3,82E-12 |
| CHD6     | 2,351676 | 1,77E-29 |
| ARHGAP19 | 2,351598 | 1,61E-08 |
| COG7     | 2,34981  | 2,87E-13 |
| NQO1     | 2,346836 | 4,43E-05 |
| PPA2     | 2,345855 | 3,19E-16 |
| ADCK3    | 2,344968 | 0,000374 |
| GSTZ1    | 2,343687 | 8,36E-20 |
| CCNG1    | 2,342651 | 2,48E-07 |
| STXBP4   | 2,340323 | 4,56E-05 |
| HES6     | 2,340209 | 0,000624 |
| NDUFB10  | 2,337887 | 1,16E-29 |
| KHK      | 2,337053 | 4,39E-14 |
| PPM1L    | 2,333581 | 0,000137 |
| EFEMP1   | 2,331765 | 1,45E-22 |
| CMTM8    | 2,330094 | 3,94E-09 |
| DTNB     | 2,325707 | 1,35E-13 |
| DTD2     | 2,325165 | 2,37E-09 |
| BPTF     | 2,322454 | 8,29E-37 |
| ESRP2    | 2,321653 | 2,29E-21 |
| PTRH2    | 2,31606  | 1,35E-19 |
| SEMA4A   | 2,315749 | 4,61E-11 |
| CACNB3   | 2,314858 | 4,04E-23 |
| PRDX2    | 2,312474 | 2,38E-26 |
| GMCL1    | 2,308947 | 2,41E-11 |
| ZNF219   | 2,307645 | 4,56E-13 |
| MMAB     | 2,306469 | 9,67E-26 |
| SH2D3A   | 2,30561  | 1,86E-05 |
| OSCP1    | 2,300715 | 0,000199 |
| F11R     | 2,296762 | 7,55E-22 |
| PUS7     | 2,2953   | 2,26E-16 |

|          |          |          |
|----------|----------|----------|
| ALAD     | 2,28842  | 4,12E-10 |
| DHX40    | 2,287201 | 2,57E-17 |
| AP3B1    | 2,281147 | 1,06E-22 |
| MMACHC   | 2,280126 | 1,56E-06 |
| ARHGAP44 | 2,278925 | 4,01E-08 |
| MYO5B    | 2,278373 | 5,17E-17 |
| GLCE     | 2,276647 | 1,42E-13 |
| DMKN     | 2,276326 | 3,74E-06 |
| PCDHGB1  | 2,274047 | 1,58E-05 |
| TEAD3    | 2,273826 | 9,79E-13 |
| SIAH2    | 2,273816 | 6,69E-17 |
| MMP24-AS | 2,272159 | 1,18E-08 |
| TCAF1    | 2,271056 | 1,92E-13 |
| SERTAD4  | 2,270469 | 4,99E-06 |
| MCM9     | 2,267919 | 1,09E-09 |
| DENND6A  | 2,265217 | 4,59E-12 |
| RSAD1    | 2,262291 | 4,29E-13 |
| FHDC1    | 2,261309 | 2,33E-05 |
| ZSCAN2   | 2,260519 | 6,79E-16 |
| TMEM37   | 2,260472 | 1,85E-06 |
| KIAA0586 | 2,259601 | 6,70E-12 |
| FAM86EP  | 2,257879 | 1,44E-05 |
| TSPAN6   | 2,256491 | 1,09E-12 |
| MIS18BP1 | 2,255365 | 1,16E-07 |
| SPR      | 2,254647 | 1,57E-22 |
| HDHC3    | 2,253072 | 1,29E-12 |
| LHPP     | 2,252961 | 1,36E-10 |
| RASGEF1A | 2,251175 | 3,78E-09 |
| ZNF771   | 2,250384 | 1,50E-06 |
| IDUA     | 2,249851 | 3,76E-05 |
| GCHFR    | 2,2479   | 0,000681 |
| RMI1     | 2,241176 | 1,93E-07 |
| HIPK1    | 2,241114 | 2,23E-29 |
| MAGI1    | 2,24108  | 7,16E-11 |
| CPNE7    | 2,23719  | 4,16E-06 |
| FTSJ3    | 2,235419 | 6,96E-19 |
| ABCC5    | 2,23332  | 1,24E-09 |
| ZNF276   | 2,233034 | 2,24E-17 |
| THUMPD3- | 2,232422 | 6,24E-05 |
| PHLPP1   | 2,23239  | 1,09E-18 |
| SURF1    | 2,231948 | 4,12E-10 |
| RBM47    | 2,231602 | 1,60E-10 |
| NEBL     | 2,226872 | 3,36E-13 |
| ARRB2    | 2,224137 | 2,94E-17 |
| TOB1     | 2,221588 | 6,98E-12 |
| TNFRSF19 | 2,220615 | 3,03E-18 |
| ZNF362   | 2,218784 | 2,30E-08 |
| GAREM    | 2,214658 | 9,03E-05 |
| SNAPC5   | 2,211369 | 6,81E-12 |
| LTBP1    | 2,210877 | 1,90E-13 |

|           |          |          |
|-----------|----------|----------|
| NR1D2     | 2,206529 | 2,10E-15 |
| DAAM1     | 2,204861 | 4,61E-17 |
| STX6      | 2,19832  | 4,93E-20 |
| ERMP1     | 2,198015 | 1,13E-07 |
| PSRC1     | 2,19496  | 1,63E-11 |
| PATZ1     | 2,19383  | 1,01E-14 |
| C1QTNF9B  | 2,19253  | 9,80E-06 |
| ARID2     | 2,191102 | 4,12E-16 |
| TBC1D9    | 2,1907   | 1,20E-17 |
| MED13     | 2,190665 | 5,75E-25 |
| PDF       | 2,189832 | 7,85E-06 |
| TET2      | 2,186594 | 9,54E-17 |
| GSE1      | 2,182786 | 9,53E-27 |
| H1FX      | 2,181721 | 4,89E-15 |
| IL17RD    | 2,178513 | 1,90E-06 |
| EHMT2     | 2,176384 | 3,62E-25 |
| DLD       | 2,176135 | 2,71E-13 |
| CD9       | 2,175448 | 7,67E-17 |
| C3orf14   | 2,17539  | 1,04E-15 |
| KNOP1     | 2,174659 | 3,35E-24 |
| ZFH3      | 2,172832 | 1,97E-21 |
| THOC7     | 2,17244  | 1,47E-27 |
| ARSG      | 2,170585 | 1,12E-07 |
| RAB3A     | 2,169848 | 0,000122 |
| NT5C      | 2,169451 | 2,61E-10 |
| CDC25C    | 2,168814 | 4,39E-06 |
| KIAA1958  | 2,167692 | 1,14E-11 |
| EGFL7     | 2,164945 | 1,00E-10 |
| SLC22A23  | 2,156183 | 4,23E-16 |
| BCDIN3D   | 2,155933 | 2,93E-05 |
| IVD       | 2,154676 | 2,07E-15 |
| CRYL1     | 2,154594 | 4,62E-05 |
| TMEM183   | 2,154071 | 7,60E-25 |
| MGC57346  | 2,15258  | 1,34E-05 |
| BBS4      | 2,152037 | 3,62E-07 |
| LINC00938 | 2,149128 | 7,18E-07 |
| PYCRL     | 2,148207 | 3,62E-11 |
| OLMALINC  | 2,148042 | 4,62E-05 |
| CNOT6     | 2,143538 | 1,30E-20 |
| AHR       | 2,141976 | 2,74E-24 |
| EAPP      | 2,140104 | 6,32E-13 |
| IQCK      | 2,13866  | 5,68E-10 |
| IDH2      | 2,134446 | 1,58E-23 |
| UBN2      | 2,131958 | 1,35E-12 |
| APRT      | 2,131371 | 6,26E-30 |
| FANCE     | 2,125991 | 0,000645 |
| ISOC1     | 2,124165 | 1,46E-19 |
| THEM6     | 2,121643 | 1,68E-16 |
| H1FO      | 2,121306 | 2,75E-06 |
| RSBN1     | 2,118846 | 1,65E-14 |



|           |          |          |
|-----------|----------|----------|
| LIG3      | 2,113982 | 8,41E-18 |
| OSR2      | 2,113933 | 0,000106 |
| WDR17     | 2,107635 | 0,000573 |
| RNF122    | 2,106671 | 2,77E-06 |
| MPND      | 2,105402 | 2,46E-11 |
| SPICE1    | 2,102798 | 5,57E-10 |
| KIF20A    | 2,100358 | 1,69E-18 |
| NOL11     | 2,097412 | 1,77E-28 |
| RCOR2     | 2,092604 | 7,34E-05 |
| ATPAF2    | 2,092085 | 6,06E-09 |
| AP1S1     | 2,091149 | 9,57E-10 |
| ACTR3B    | 2,089261 | 3,90E-13 |
| C2orf68   | 2,08673  | 4,27E-17 |
| CARHSP1   | 2,082649 | 3,72E-19 |
| MED20     | 2,080032 | 3,18E-08 |
| MUT       | 2,079136 | 1,21E-08 |
| PI4K2B    | 2,07909  | 6,05E-12 |
| MED13L    | 2,078596 | 1,66E-17 |
| KIF14     | 2,078207 | 3,88E-19 |
| PCLO      | 2,076885 | 1,11E-10 |
| MRPS25    | 2,076017 | 1,18E-20 |
| AP4M1     | 2,073632 | 4,44E-12 |
| C14orf2   | 2,070575 | 1,61E-22 |
| TOP2B     | 2,070374 | 4,10E-26 |
| MDM1      | 2,066916 | 3,44E-05 |
| MUC1      | 2,06627  | 0,000226 |
| DFNB31    | 2,065129 | 5,08E-07 |
| TEAD2     | 2,063764 | 5,44E-13 |
| TRIM4     | 2,06282  | 2,91E-14 |
| EPB41L4A- | 2,060202 | 1,77E-06 |
| TTC8      | 2,058287 | 7,10E-11 |
| INTS4     | 2,056741 | 5,35E-12 |
| ANGEL1    | 2,056503 | 2,77E-10 |
| PARPBP    | 2,056435 | 2,67E-12 |
| DNAJC19   | 2,056042 | 6,49E-10 |
| LNX2      | 2,055337 | 4,79E-15 |
| FAM50B    | 2,054642 | 9,76E-08 |
| ZBTB5     | 2,053959 | 2,52E-11 |
| EIF5AL1   | 2,053593 | 4,36E-08 |
| USP8      | 2,053147 | 1,03E-25 |
| WDR54     | 2,052941 | 3,21E-08 |
| ANKS1A    | 2,05273  | 3,43E-17 |
| CETN3     | 2,051963 | 3,38E-07 |
| ARPP19    | 2,050835 | 2,54E-25 |
| C9orf116  | 2,050161 | 1,47E-05 |
| NCBP2-AS2 | 2,048272 | 2,08E-10 |
| CTNNBIP1  | 2,046523 | 8,16E-10 |
| THAP9     | 2,046201 | 0,00086  |
| LINC01521 | 2,045241 | 0,000151 |
| TMPO-AS1  | 2,037517 | 5,56E-05 |

|           |          |          |
|-----------|----------|----------|
| ZNF3      | 2,031505 | 2,27E-18 |
| PANK3     | 2,029899 | 1,29E-15 |
| RNF208    | 2,029619 | 5,03E-08 |
| BTBD6     | 2,02554  | 6,67E-08 |
| PRKX      | 2,025419 | 8,66E-11 |
| CINP      | 2,023568 | 6,01E-08 |
| MDM4      | 2,022631 | 3,35E-09 |
| EIF4B     | 2,02175  | 3,49E-31 |
| ZNF252P   | 2,020998 | 1,28E-18 |
| ILF3-AS1  | 2,020644 | 1,03E-07 |
| ZMYND11   | 2,01959  | 4,00E-20 |
| HMBS      | 2,018393 | 2,14E-19 |
| TBC1D5    | 2,018124 | 6,77E-19 |
| IFT27     | 2,017629 | 9,88E-08 |
| MCCC2     | 2,015866 | 6,40E-16 |
| SCAI      | 2,014994 | 3,55E-07 |
| NMU       | 2,014965 | 0,000607 |
| TPRN      | 2,014202 | 6,12E-12 |
| SCAND2P   | 2,013952 | 0,000946 |
| CNOT8     | 2,01389  | 4,48E-18 |
| SMURF2    | 2,01382  | 2,77E-11 |
| ALG6      | 2,012594 | 0,000112 |
| DEPDC1B   | 2,011123 | 1,17E-08 |
| MGAT4A    | 2,008719 | 4,05E-05 |
| IFT22     | 2,007305 | 2,81E-18 |
| MKS1      | 2,006108 | 1,16E-10 |
| EZH2      | 2,004043 | 4,08E-10 |
| TAMM41    | 2,002768 | 3,23E-12 |
| BBS2      | 2,002129 | 3,67E-10 |
| NSD1      | 2,000123 | 1,54E-29 |
| ZNF624    | 1,998038 | 5,31E-05 |
| SLC25A29  | 1,997946 | 4,32E-17 |
| SKIDA1    | 1,996079 | 0,000239 |
| HIST1H2BD | 1,995616 | 0,000298 |
| DENND2D   | 1,994185 | 1,50E-13 |
| RFX5      | 1,994028 | 8,05E-08 |
| ZMIZ1     | 1,99375  | 1,10E-13 |
| PRUNE     | 1,993064 | 5,49E-09 |
| ZNF618    | 1,991568 | 3,29E-23 |
| NR1H3     | 1,991531 | 0,000252 |
| ZNF74     | 1,987459 | 5,20E-16 |
| GSTM3     | 1,98596  | 3,48E-05 |
| LINC00674 | 1,983378 | 1,03E-12 |
| IST1      | 1,983333 | 9,47E-17 |
| SCD       | 1,982163 | 2,03E-29 |
| FAM210B   | 1,981829 | 1,48E-09 |
| MCM2      | 1,981739 | 4,38E-25 |
| TMEM198f  | 1,980963 | 3,60E-05 |
| ARHGEF3   | 1,979968 | 2,64E-09 |
| SULF2     | 1,97995  | 5,79E-13 |

|            |          |          |
|------------|----------|----------|
| ZNF18      | 1,978354 | 0,000492 |
| INSR       | 1,974233 | 0,000998 |
| LYSMD2     | 1,97422  | 4,72E-11 |
| SLC9A3R2   | 1,97058  | 1,13E-15 |
| SETDB1     | 1,970197 | 1,11E-12 |
| PSMD5-AS1  | 1,969318 | 4,98E-06 |
| DPH1       | 1,969282 | 0,000102 |
| CEP97      | 1,968487 | 1,21E-05 |
| WDR6       | 1,966503 | 1,76E-13 |
| ASMTL      | 1,965056 | 3,22E-08 |
| LOC101927  | 1,96489  | 7,24E-05 |
| PITPNA-AS1 | 1,963224 | 0,000243 |
| ADAT1      | 1,962836 | 4,95E-17 |
| SIGIRR     | 1,961264 | 4,66E-13 |
| ARHGEF9    | 1,96125  | 3,08E-05 |
| LMNB1      | 1,957719 | 4,93E-19 |
| GDE1       | 1,954254 | 3,55E-15 |
| SNHG19     | 1,951393 | 0,000162 |
| IL27RA     | 1,951365 | 1,72E-05 |
| TBCK       | 1,950823 | 9,46E-12 |
| RPRD2      | 1,950583 | 4,66E-23 |
| HSPA1A     | 1,950424 | 5,31E-06 |
| CLNS1A     | 1,949675 | 5,86E-22 |
| LOC730101  | 1,949147 | 0,000902 |
| HMG20B     | 1,945369 | 4,69E-23 |
| TMEM106C   | 1,944796 | 3,93E-13 |
| COA3       | 1,944114 | 2,21E-10 |
| FIS1       | 1,943142 | 1,00E-18 |
| NUDT16     | 1,942676 | 3,52E-06 |
| GIN1       | 1,940487 | 2,23E-06 |
| C16orf46   | 1,93705  | 4,34E-05 |
| GALNT3     | 1,936891 | 1,72E-06 |
| ANKRD50    | 1,936362 | 3,55E-19 |
| DCP2       | 1,936169 | 8,46E-14 |
| ZCWPW1     | 1,936132 | 6,32E-05 |
| DDX6       | 1,934929 | 5,78E-23 |
| H2AFX      | 1,93456  | 4,60E-23 |
| LMBRD1     | 1,931546 | 0,000382 |
| BCAS2      | 1,928126 | 8,13E-19 |
| ZNF845     | 1,928078 | 5,76E-09 |
| SLC24A1    | 1,927858 | 1,47E-08 |
| LOC645513  | 1,925706 | 0,000425 |
| CENPBD1    | 1,925454 | 4,12E-10 |
| ZNF277     | 1,925222 | 6,00E-11 |
| MYEF2      | 1,922917 | 3,49E-07 |
| SIKE1      | 1,922111 | 1,21E-20 |
| PC         | 1,922052 | 0,000941 |
| CDKN3      | 1,917677 | 1,02E-15 |
| MVK        | 1,91755  | 4,90E-05 |
| HIP1       | 1,916506 | 3,84E-12 |

|          |          |          |
|----------|----------|----------|
| ENSA     | 1,916195 | 2,31E-25 |
| ZNF354A  | 1,91538  | 1,50E-08 |
| MTHFD2   | 1,912545 | 3,65E-06 |
| WDR89    | 1,912352 | 1,70E-10 |
| NUCKS1   | 1,91186  | 4,73E-18 |
| NEK11    | 1,911817 | 0,000461 |
| ONECUT2  | 1,911399 | 2,72E-08 |
| NEO1     | 1,90769  | 2,97E-14 |
| P2RY2    | 1,907019 | 1,09E-08 |
| UBL7-AS1 | 1,905989 | 0,000506 |
| ZNF839   | 1,905101 | 1,72E-05 |
| ZNF688   | 1,904465 | 2,29E-06 |
| HAUS4    | 1,902657 | 9,93E-06 |
| RPAIN    | 1,899882 | 7,96E-12 |
| PDK2     | 1,89936  | 0,000438 |
| RNF182   | 1,899269 | 0,000939 |
| KIAA0100 | 1,899039 | 3,93E-10 |
| TRNT1    | 1,898837 | 2,22E-07 |
| TMEM161  | 1,898144 | 3,52E-08 |
| ACACB    | 1,895755 | 8,80E-08 |
| ZFP1     | 1,895073 | 5,48E-11 |
| TRRAP    | 1,894061 | 5,95E-26 |
| CSAD     | 1,892558 | 0,000329 |
| C11orf30 | 1,892064 | 2,43E-12 |
| ZBED6    | 1,890034 | 0,000101 |
| SPATA2L  | 1,886766 | 6,59E-11 |
| ADRBK2   | 1,8863   | 0,00033  |
| SUPT4H1  | 1,886089 | 6,53E-18 |
| PGBD2    | 1,88535  | 5,71E-05 |
| HOMEZ    | 1,884982 | 2,45E-07 |
| TIGD2    | 1,88469  | 0,0008   |
| GAN      | 1,882314 | 7,67E-06 |
| PIGM     | 1,881763 | 5,62E-07 |
| KLHDC3   | 1,878681 | 6,47E-11 |
| CHURC1   | 1,878365 | 3,75E-11 |
| KAT2A    | 1,877984 | 5,16E-20 |
| BRWD1    | 1,877667 | 1,19E-10 |
| FAM53B   | 1,876941 | 8,19E-17 |
| OCLN     | 1,875707 | 1,25E-06 |
| MAPK6    | 1,87364  | 8,08E-22 |
| DDX59    | 1,873324 | 3,11E-06 |
| NOA1     | 1,872962 | 3,27E-10 |
| TRMT5    | 1,872895 | 2,03E-10 |
| DHODH    | 1,87246  | 2,33E-10 |
| CBLB     | 1,870345 | 2,92E-10 |
| C6orf120 | 1,870185 | 7,34E-10 |
| KCTD1    | 1,8701   | 2,69E-08 |
| CD24     | 1,869747 | 2,66E-13 |
| PVRL1    | 1,869125 | 6,94E-07 |
| ZNF619   | 1,866254 | 0,000371 |

|          |          |          |
|----------|----------|----------|
| BRCA2    | 1,865189 | 1,66E-06 |
| PCMTD2   | 1,864824 | 2,66E-07 |
| GAS8     | 1,864658 | 3,69E-12 |
| PLXNB1   | 1,864245 | 1,47E-13 |
| TNS2     | 1,863907 | 2,08E-05 |
| C12orf66 | 1,862493 | 6,58E-05 |
| C10orf35 | 1,861893 | 0,000212 |
| MAPK3    | 1,861204 | 5,58E-08 |
| LEO1     | 1,860617 | 5,03E-23 |
| CBR4     | 1,858207 | 5,60E-10 |
| GCH1     | 1,857495 | 3,85E-08 |
| PGM2L1   | 1,855357 | 5,89E-10 |
| CLTC     | 1,85472  | 3,74E-14 |
| CBX8     | 1,854249 | 4,62E-06 |
| ZNF510   | 1,850307 | 3,35E-08 |
| DCTPP1   | 1,848254 | 3,34E-16 |
| PIGO     | 1,84817  | 6,86E-07 |
| RPS3     | 1,84653  | 2,09E-15 |
| C1QBP    | 1,844614 | 6,59E-19 |
| AMOT     | 1,840886 | 3,19E-09 |
| C12orf57 | 1,839899 | 1,56E-09 |
| SIVA1    | 1,839305 | 7,48E-12 |
| SNHG4    | 1,834751 | 0,000904 |
| NUDT3    | 1,834494 | 6,05E-07 |
| PAXIP1   | 1,832357 | 1,32E-11 |
| C14orf93 | 1,831975 | 2,87E-05 |
| GLRX5    | 1,830839 | 1,52E-13 |
| AGFG2    | 1,830608 | 0,000559 |
| ZNF552   | 1,828207 | 0,000167 |
| COX7C    | 1,825253 | 2,60E-20 |
| MRPL41   | 1,825119 | 2,10E-15 |
| PAQR8    | 1,823404 | 2,69E-05 |
| TMEM129  | 1,823043 | 6,46E-06 |
| ZNF212   | 1,822999 | 4,12E-09 |
| COIL     | 1,821578 | 1,30E-06 |
| TGIF2    | 1,821516 | 1,54E-08 |
| ARMC10   | 1,821151 | 1,30E-15 |
| TMEM64   | 1,819807 | 6,58E-19 |
| TMTC4    | 1,819782 | 7,15E-06 |
| LRFN3    | 1,81922  | 2,01E-05 |
| POLI     | 1,817593 | 0,000605 |
| PAIP2    | 1,817553 | 1,94E-10 |
| PAPOLG   | 1,817524 | 4,99E-05 |
| CCP110   | 1,817135 | 9,10E-06 |
| PGAP2    | 1,816811 | 1,31E-09 |
| SLC35B2  | 1,815717 | 3,07E-10 |
| EFCAB11  | 1,814845 | 9,84E-07 |
| IMPACT   | 1,814725 | 3,46E-12 |
| DDAH2    | 1,813744 | 6,02E-11 |
| ELMOD2   | 1,81354  | 1,19E-06 |

|                       |          |          |
|-----------------------|----------|----------|
| RAB15                 | 1,811328 | 9,28E-11 |
| PIAS3                 | 1,811046 | 1,63E-11 |
| ZNF480                | 1,810523 | 1,67E-10 |
| MTUS1                 | 1,809785 | 6,56E-10 |
| CIRBP                 | 1,809545 | 2,91E-07 |
| BRMS1L                | 1,809079 | 2,11E-06 |
| ATP6V1C2              | 1,809021 | 0,00054  |
| LMTK2                 | 1,808107 | 5,57E-15 |
| DHRS4                 | 1,807398 | 9,76E-08 |
| POGZ                  | 1,805812 | 4,23E-10 |
| OMA1                  | 1,805486 | 4,62E-05 |
| ZNF629                | 1,804484 | 1,27E-17 |
| MPP7                  | 1,804331 | 5,22E-11 |
| BCL7A                 | 1,802896 | 3,22E-12 |
| RNASEH1- <del>A</del> | 1,801181 | 3,00E-08 |
| DBP                   | 1,798736 | 5,60E-06 |
| ATP5A1                | 1,798665 | 2,82E-20 |
| PAQR4                 | 1,798326 | 1,64E-20 |
| PLK1                  | 1,798269 | 4,99E-10 |
| AP4E1                 | 1,796751 | 8,16E-09 |
| CDH24                 | 1,796579 | 5,60E-11 |
| ZNF33B                | 1,79585  | 1,00E-09 |
| ARID4A                | 1,79581  | 2,30E-07 |
| WDR83                 | 1,795148 | 6,11E-07 |
| SAYS1                 | 1,794276 | 1,07E-12 |
| LRCH4                 | 1,793514 | 2,25E-13 |
| ZNF254                | 1,790305 | 8,39E-09 |
| RPS25                 | 1,787901 | 2,01E-15 |
| FANCM                 | 1,787473 | 7,91E-05 |
| PRICKLE2              | 1,787447 | 1,36E-05 |
| METTL2A               | 1,787083 | 5,17E-14 |
| HEXDC                 | 1,786851 | 1,34E-06 |
| DHFR                  | 1,785347 | 2,04E-11 |
| CBS                   | 1,784097 | 3,93E-07 |
| LAMTOR4               | 1,78365  | 5,29E-14 |
| ATXN1L                | 1,781752 | 3,54E-10 |
| TMEM144               | 1,781664 | 0,000229 |
| IDH1                  | 1,781036 | 3,17E-21 |
| SNHG8                 | 1,780525 | 0,000336 |
| IDI1                  | 1,779901 | 3,96E-08 |
| NME4                  | 1,777864 | 2,24E-17 |
| ACAT2                 | 1,776825 | 1,87E-11 |
| DMTF1                 | 1,77649  | 3,30E-05 |
| RMND5B                | 1,775296 | 4,63E-17 |
| ISOC2                 | 1,773746 | 3,54E-14 |
| ZNF184                | 1,772642 | 2,41E-08 |
| ZNF286A               | 1,771197 | 5,46E-12 |
| SHPK                  | 1,770773 | 9,10E-09 |
| RPP25                 | 1,770128 | 3,27E-08 |
| NLN                   | 1,769957 | 1,34E-18 |

|          |          |          |
|----------|----------|----------|
| PRADC1   | 1,769858 | 0,000741 |
| PPCDC    | 1,768577 | 1,24E-06 |
| HSD17B4  | 1,76796  | 2,59E-10 |
| EZH1     | 1,767788 | 0,000243 |
| SNRNP25  | 1,767131 | 3,03E-07 |
| LMBR1    | 1,762024 | 6,62E-14 |
| PDCD6    | 1,760457 | 5,21E-14 |
| CCNF     | 1,758709 | 2,71E-15 |
| TMEM183f | 1,756443 | 9,69E-05 |
| PAGR1    | 1,752512 | 5,68E-17 |
| ZNF337   | 1,752309 | 0,000142 |
| RAB3IP   | 1,750124 | 1,29E-16 |
| ACAD8    | 1,749876 | 0,000214 |
| HADH     | 1,748878 | 3,58E-08 |
| MSRB1    | 1,748159 | 1,49E-06 |
| C9orf114 | 1,746066 | 6,47E-11 |
| ATXN3    | 1,745476 | 8,62E-08 |
| ARHGEF39 | 1,744788 | 0,000862 |
| KIF26A   | 1,743921 | 8,57E-05 |
| C15orf61 | 1,743277 | 4,82E-05 |
| WIBG     | 1,740556 | 8,21E-12 |
| C14orf79 | 1,739315 | 0,000333 |
| KLHDC2   | 1,737971 | 6,09E-06 |
| HSPA1B   | 1,735859 | 7,07E-05 |
| RNF169   | 1,733528 | 4,30E-09 |
| ZSWIM7   | 1,733474 | 2,90E-07 |
| IFT122   | 1,73175  | 7,29E-06 |
| ABHD11   | 1,73108  | 1,06E-09 |
| COPG2    | 1,730685 | 1,16E-09 |
| NELFA    | 1,730384 | 6,93E-14 |
| CASZ1    | 1,728421 | 1,34E-05 |
| CYB5D2   | 1,726978 | 9,42E-06 |
| FBXL19   | 1,72624  | 1,15E-12 |
| MFSD3    | 1,72609  | 4,06E-12 |
| TMPO     | 1,726011 | 5,55E-09 |
| FBXO31   | 1,724073 | 8,83E-13 |
| RGS12    | 1,72406  | 3,31E-08 |
| NMRAL1   | 1,72365  | 1,60E-14 |
| CORO1B   | 1,721865 | 6,12E-06 |
| ARMCX6   | 1,7204   | 1,79E-08 |
| C8orf82  | 1,719251 | 5,12E-12 |
| RPS29    | 1,71895  | 4,45E-10 |
| PLEKHA6  | 1,718805 | 1,15E-09 |
| SLMAP    | 1,718589 | 1,35E-09 |
| HSP90AA1 | 1,718451 | 7,50E-11 |
| HEATR5A  | 1,717347 | 1,75E-09 |
| HSDL1    | 1,716708 | 2,92E-08 |
| ACSF2    | 1,715126 | 0,000357 |
| TARBP2   | 1,712335 | 1,55E-12 |
| CCPG1    | 1,711003 | 7,45E-05 |

|           |          |          |
|-----------|----------|----------|
| PLEKHF2   | 1,709645 | 3,50E-12 |
| CHCHD6    | 1,708917 | 5,88E-05 |
| CCDC47    | 1,706468 | 2,23E-15 |
| TBX3      | 1,706466 | 1,16E-06 |
| FBXW9     | 1,704415 | 2,68E-08 |
| BAG5      | 1,703326 | 5,79E-12 |
| MCM7      | 1,703263 | 1,23E-14 |
| CAND1     | 1,700891 | 7,48E-16 |
| TARS2     | 1,698113 | 1,89E-10 |
| HMGCS1    | 1,697279 | 2,22E-07 |
| NFS1      | 1,696606 | 5,98E-09 |
| NOP14-AS1 | 1,696443 | 2,69E-05 |
| RSBN1L    | 1,695889 | 1,40E-07 |
| KIAA1467  | 1,695826 | 0,000375 |
| TRPM7     | 1,695769 | 9,14E-18 |
| SSH3      | 1,694805 | 5,32E-08 |
| RBSN      | 1,693486 | 8,98E-12 |
| SMAD6     | 1,692367 | 0,000556 |
| ZNF766    | 1,691099 | 3,70E-11 |
| ZNF490    | 1,690533 | 9,28E-05 |
| INPP4B    | 1,690199 | 3,69E-06 |
| ULK1      | 1,69015  | 2,84E-07 |
| NCBP2     | 1,689002 | 1,85E-14 |
| PPM1A     | 1,68636  | 5,34E-08 |
| SCAMP1    | 1,683781 | 3,02E-09 |
| RALGAPA2  | 1,683431 | 2,90E-05 |
| TMEM254   | 1,683095 | 5,60E-08 |
| TMEM216   | 1,68018  | 0,000229 |
| LOC93622  | 1,679393 | 3,74E-08 |
| ZFP3      | 1,676905 | 1,20E-07 |
| WWOX      | 1,676722 | 3,34E-08 |
| GLTSCR1L  | 1,674471 | 1,01E-09 |
| PPP1R9A   | 1,670392 | 4,41E-07 |
| GABPB2    | 1,670117 | 1,68E-05 |
| RPL17     | 1,668092 | 2,98E-09 |
| TMEM134   | 1,66688  | 1,59E-06 |
| BCL2L1    | 1,666191 | 4,51E-08 |
| PIGQ      | 1,665733 | 5,84E-09 |
| GABPB1    | 1,664993 | 2,17E-09 |
| TP53      | 1,664072 | 2,30E-09 |
| FAM175A   | 1,66393  | 1,15E-07 |
| PODXL     | 1,66379  | 6,70E-08 |
| ITPKB     | 1,663447 | 1,39E-06 |
| LOC148413 | 1,662514 | 8,30E-07 |
| FRMD6     | 1,658215 | 5,74E-10 |
| SAPCD2    | 1,656808 | 2,13E-08 |
| TRAF7     | 1,656195 | 2,82E-17 |
| TACO1     | 1,656149 | 3,55E-15 |
| ARNT      | 1,656114 | 3,50E-12 |
| ZNF433    | 1,654812 | 0,000126 |



|           |          |          |
|-----------|----------|----------|
| FAM111B   | 1,654396 | 1,07E-08 |
| NAT1      | 1,654198 | 0,000473 |
| PSTPIP2   | 1,652361 | 8,16E-06 |
| TMCO6     | 1,651225 | 5,25E-05 |
| ZNF500    | 1,649299 | 0,000716 |
| ZNF282    | 1,646948 | 4,05E-14 |
| MYO6      | 1,645444 | 1,66E-12 |
| MAZ       | 1,645281 | 6,94E-16 |
| PHACTR2   | 1,640453 | 1,39E-08 |
| IRX5      | 1,640102 | 5,60E-08 |
| GIGYF1    | 1,638922 | 0,000133 |
| LOC728554 | 1,637712 | 3,09E-07 |
| BTBD9     | 1,637574 | 0,00016  |
| SECISBP2  | 1,63661  | 1,16E-08 |
| ETFA      | 1,635494 | 1,72E-09 |
| EEF2K     | 1,635415 | 5,83E-12 |
| ATP11C    | 1,633504 | 2,44E-08 |
| GTF2I     | 1,633442 | 5,53E-18 |
| POP7      | 1,633241 | 1,87E-07 |
| LRP5      | 1,633206 | 1,67E-11 |
| C14orf80  | 1,632247 | 1,24E-09 |
| NDUFAB1   | 1,630624 | 3,59E-08 |
| AASDH     | 1,629913 | 0,000668 |
| UQCRH     | 1,629495 | 1,32E-16 |
| DIRAS1    | 1,628618 | 9,93E-09 |
| MRE11A    | 1,627931 | 1,33E-06 |
| SOS2      | 1,627651 | 1,49E-09 |
| LRRC75A-A | 1,627301 | 1,39E-06 |
| NCAPD2    | 1,625919 | 1,20E-13 |
| CECR5     | 1,625478 | 1,00E-10 |
| FKBP3     | 1,624826 | 1,18E-10 |
| POLR3K    | 1,623104 | 8,59E-06 |
| NDUFB1    | 1,622386 | 1,07E-09 |
| RALBP1    | 1,620907 | 5,64E-10 |
| KBTBD4    | 1,620712 | 4,71E-07 |
| ZNF786    | 1,620182 | 1,40E-05 |
| MECOM     | 1,619245 | 1,66E-06 |
| VGLL4     | 1,618019 | 2,50E-09 |
| ZMYM3     | 1,617032 | 1,01E-10 |
| NELFCD    | 1,616881 | 1,16E-12 |
| ZNF33A    | 1,616562 | 1,39E-10 |
| DNAAF2    | 1,616156 | 2,41E-10 |
| INVS      | 1,615904 | 2,20E-07 |
| NDC80     | 1,611135 | 2,95E-05 |
| TMOD3     | 1,611064 | 2,87E-18 |
| SPINT2    | 1,61073  | 4,61E-17 |
| DICER1    | 1,610548 | 1,91E-07 |
| WDR73     | 1,608068 | 5,86E-10 |
| CYB561D1  | 1,60537  | 5,48E-06 |
| TRMT10A   | 1,603902 | 0,000216 |

|          |          |          |
|----------|----------|----------|
| SKA2     | 1,603899 | 4,94E-11 |
| FKBPL    | 1,6036   | 5,50E-07 |
| RMND5A   | 1,603574 | 6,27E-12 |
| SRPK2    | 1,599865 | 1,08E-12 |
| SMG8     | 1,599627 | 8,06E-10 |
| JRK      | 1,599064 | 1,82E-07 |
| VPS72    | 1,598049 | 8,98E-08 |
| MTERF1   | 1,596817 | 1,95E-05 |
| IMPDH2   | 1,596411 | 2,47E-10 |
| FBXO21   | 1,595206 | 2,35E-10 |
| EXOC3    | 1,595074 | 7,30E-09 |
| CAMSAP3  | 1,595057 | 7,26E-12 |
| TAPT1    | 1,593933 | 0,000458 |
| ZNF680   | 1,590513 | 3,94E-06 |
| CHD3     | 1,588036 | 2,61E-13 |
| IFT88    | 1,586817 | 2,06E-05 |
| CRBN     | 1,585955 | 1,16E-05 |
| NFIA     | 1,584741 | 5,60E-06 |
| DLG3     | 1,584053 | 1,36E-11 |
| AEN      | 1,58384  | 9,09E-10 |
| ZNF429   | 1,583687 | 7,74E-05 |
| KLHL12   | 1,58227  | 4,91E-09 |
| AP1G1    | 1,580792 | 2,31E-08 |
| NAPEPLD  | 1,580116 | 0,000806 |
| SLC25A11 | 1,579914 | 5,77E-12 |
| DECR1    | 1,579235 | 3,75E-11 |
| KLF5     | 1,578457 | 4,63E-13 |
| ZDHHC24  | 1,578153 | 2,52E-05 |
| IER5L    | 1,573655 | 8,72E-05 |
| GSK3B    | 1,57347  | 3,79E-13 |
| AKT1     | 1,572954 | 1,38E-08 |
| ZKSCAN5  | 1,572951 | 2,05E-09 |
| PANK1    | 1,572893 | 1,05E-07 |
| BRD8     | 1,572561 | 7,13E-07 |
| TIMELESS | 1,570645 | 8,30E-10 |
| RALGAPA1 | 1,570056 | 1,33E-08 |
| CBX1     | 1,568354 | 1,45E-10 |
| TMEM260  | 1,567449 | 5,86E-05 |
| YEATS4   | 1,566484 | 1,78E-05 |
| TMEM14A  | 1,566232 | 6,60E-06 |
| THAP5    | 1,565833 | 2,75E-07 |
| ADGRA3   | 1,56565  | 7,77E-06 |
| UBE3C    | 1,565538 | 5,59E-09 |
| TATDN2   | 1,565316 | 5,56E-09 |
| TOR3A    | 1,56394  | 7,79E-10 |
| NET1     | 1,563598 | 6,19E-05 |
| FUT8     | 1,562643 | 1,47E-11 |
| G6PC3    | 1,561988 | 6,01E-10 |
| C21orf58 | 1,560576 | 0,000691 |
| FGD5-AS1 | 1,559635 | 9,09E-12 |

|         |          |          |
|---------|----------|----------|
| GINS2   | 1,559329 | 3,51E-12 |
| PRDM15  | 1,558076 | 1,90E-06 |
| CDS1    | 1,557831 | 9,69E-08 |
| GNPNAT1 | 1,557579 | 6,42E-12 |
| RPS3A   | 1,557509 | 3,45E-07 |
| NCOA2   | 1,557459 | 8,46E-06 |
| CTCF    | 1,557412 | 3,36E-13 |
| HARS2   | 1,556996 | 6,75E-12 |
| MTX3    | 1,55645  | 0,000833 |
| UQCRC2  | 1,552832 | 1,42E-15 |
| SMARCC1 | 1,552275 | 4,06E-17 |
| UBTF    | 1,551935 | 2,15E-08 |
| FUK     | 1,551481 | 0,000536 |
| DCAF11  | 1,550907 | 4,03E-06 |
| THUMPD1 | 1,550876 | 9,65E-11 |
| ARFIP1  | 1,550876 | 3,79E-08 |
| CTU2    | 1,54964  | 3,95E-09 |
| RPL13   | 1,549544 | 3,70E-12 |
| LRBA    | 1,546792 | 1,92E-07 |
| ATP5D   | 1,546325 | 1,86E-16 |
| CAMK2G  | 1,545143 | 1,14E-08 |
| COQ7    | 1,544863 | 0,000165 |
| FRS2    | 1,543178 | 1,58E-06 |
| STYX    | 1,542021 | 3,47E-08 |
| PBX2    | 1,541452 | 3,92E-15 |
| MVD     | 1,541358 | 0,000105 |
| SLC19A1 | 1,541313 | 6,39E-08 |
| NBEAL2  | 1,540958 | 4,64E-07 |
| PPAP2C  | 1,540694 | 5,81E-07 |
| NUDCD2  | 1,540145 | 1,62E-08 |
| ZDHHC12 | 1,539971 | 2,38E-07 |
| BAMBI   | 1,538751 | 2,31E-15 |
| MPV17L2 | 1,536652 | 2,93E-09 |
| TAF11   | 1,536219 | 6,52E-10 |
| KAT7    | 1,534244 | 1,77E-10 |
| NRAS    | 1,533787 | 2,57E-09 |
| MED28   | 1,532675 | 3,03E-08 |
| ENTPD5  | 1,532599 | 0,000139 |
| N4BP2   | 1,532472 | 1,10E-05 |
| PSKH1   | 1,531849 | 3,60E-09 |
| IREB2   | 1,531447 | 2,92E-14 |
| NAA40   | 1,530941 | 2,03E-07 |
| ATP5L   | 1,530691 | 7,79E-17 |
| OXLD1   | 1,53001  | 7,18E-05 |
| NARS2   | 1,528458 | 3,59E-07 |
| CRIP2   | 1,528151 | 9,56E-13 |
| SYPL1   | 1,527971 | 8,32E-09 |
| CIPC    | 1,526829 | 1,43E-06 |
| UNK     | 1,526779 | 2,59E-06 |
| NDUFA5  | 1,526553 | 3,62E-07 |

|          |          |          |
|----------|----------|----------|
| NIPAL2   | 1,526329 | 0,001005 |
| TRIAP1   | 1,521321 | 1,05E-07 |
| DPAGT1   | 1,52034  | 1,03E-08 |
| PRKRIR   | 1,51842  | 1,27E-10 |
| ZC3H10   | 1,518136 | 0,000101 |
| SNX18    | 1,51802  | 5,41E-06 |
| C2CD3    | 1,517796 | 1,51E-08 |
| BRF1     | 1,514499 | 6,08E-06 |
| HAUS1    | 1,511718 | 2,52E-06 |
| DBF4     | 1,511018 | 1,42E-10 |
| PRIM1    | 1,508136 | 6,58E-06 |
| SPAG5    | 1,507444 | 3,77E-09 |
| NFIB     | 1,507135 | 1,03E-07 |
| WDR59    | 1,506864 | 7,09E-08 |
| SF3B3    | 1,506316 | 3,53E-10 |
| SDHA     | 1,505773 | 1,84E-07 |
| HELLS    | 1,505555 | 1,15E-07 |
| WRB      | 1,504805 | 1,91E-06 |
| CEP131   | 1,503016 | 2,51E-05 |
| GBAP1    | 1,501805 | 0,000309 |
| LYPLAL1  | 1,499304 | 0,000141 |
| FAM83D   | 1,499034 | 1,68E-08 |
| MEX3B    | 1,498633 | 6,27E-07 |
| SRCAP    | 1,498364 | 7,39E-17 |
| ACOT13   | 1,497944 | 2,37E-07 |
| EAF1     | 1,497713 | 1,96E-07 |
| TOP2A    | 1,497585 | 3,47E-08 |
| POLD3    | 1,496776 | 8,68E-10 |
| COA5     | 1,496459 | 3,70E-07 |
| SPATA33  | 1,495411 | 1,59E-07 |
| KCTD3    | 1,494785 | 3,87E-10 |
| C9orf156 | 1,49197  | 1,45E-05 |
| IFT74    | 1,491646 | 0,000151 |
| HMGB3    | 1,490049 | 5,58E-12 |
| KIAA0195 | 1,487168 | 1,35E-10 |
| ZC3H6    | 1,486784 | 0,000698 |
| TMEM132/ | 1,485725 | 1,31E-05 |
| INTS5    | 1,485337 | 8,93E-06 |
| RPUSD3   | 1,485247 | 5,66E-09 |
| DCAF8    | 1,485166 | 1,54E-08 |
| ARF3     | 1,484554 | 6,16E-11 |
| SLC37A4  | 1,481307 | 2,73E-12 |
| CBLL1    | 1,481154 | 8,20E-11 |
| LYSMD1   | 1,4811   | 5,10E-05 |
| C2CD2L   | 1,480729 | 0,000287 |
| C11orf73 | 1,480689 | 6,64E-07 |
| MTHFD1   | 1,480355 | 2,14E-17 |
| MTIF3    | 1,48026  | 5,61E-07 |
| PAN3     | 1,479539 | 1,14E-05 |
| H3F3B    | 1,478748 | 1,36E-16 |

|          |          |          |
|----------|----------|----------|
| NLK      | 1,477695 | 3,06E-06 |
| FBXO22   | 1,477249 | 5,25E-09 |
| RPS15A   | 1,47702  | 4,02E-11 |
| NAA50    | 1,475677 | 2,31E-15 |
| STRBP    | 1,475344 | 3,67E-10 |
| TCF25    | 1,474642 | 9,13E-11 |
| TM7SF3   | 1,472773 | 8,17E-07 |
| SEL1L    | 1,472073 | 9,23E-10 |
| SMAD1    | 1,472049 | 4,96E-09 |
| TRIM65   | 1,470091 | 0,000936 |
| XPOT     | 1,469803 | 7,86E-09 |
| ZNF165   | 1,468712 | 2,15E-06 |
| CNIH1    | 1,467036 | 4,96E-10 |
| SGOL1    | 1,466652 | 6,10E-07 |
| EBPL     | 1,466524 | 0,000339 |
| TMA16    | 1,465188 | 4,00E-06 |
| BRD3     | 1,464941 | 1,22E-08 |
| PIGS     | 1,463319 | 0,00056  |
| ORC5     | 1,462211 | 4,33E-05 |
| ALG8     | 1,461654 | 4,25E-05 |
| ZNF43    | 1,461442 | 8,16E-06 |
| GCDH     | 1,460469 | 8,29E-08 |
| SREBF1   | 1,460291 | 4,48E-08 |
| ASPM     | 1,459763 | 7,99E-08 |
| C3orf38  | 1,459485 | 3,16E-08 |
| TMEM186  | 1,457195 | 8,45E-05 |
| ADCK1    | 1,45629  | 0,000102 |
| RHOD     | 1,456277 | 0,000347 |
| NFRKB    | 1,456031 | 3,02E-08 |
| TMOD2    | 1,45544  | 0,000564 |
| RALGDS   | 1,45498  | 7,52E-09 |
| UBFD1    | 1,454744 | 3,44E-09 |
| TRAPPC13 | 1,453642 | 4,70E-07 |
| INSIG1   | 1,453364 | 1,95E-05 |
| AKAP9    | 1,450365 | 3,10E-05 |
| HMGB2    | 1,449195 | 2,42E-05 |
| SIN3A    | 1,44846  | 3,15E-14 |
| C17orf62 | 1,448233 | 1,44E-10 |
| MPHOSPH8 | 1,447105 | 2,03E-09 |
| GSKIP    | 1,446683 | 1,66E-06 |
| TPX2     | 1,44655  | 3,73E-13 |
| XRCC3    | 1,44542  | 0,000754 |
| ZBTB22   | 1,444922 | 2,93E-05 |
| GATAD1   | 1,44465  | 2,65E-06 |
| ATG7     | 1,443812 | 0,000202 |
| NARF     | 1,443655 | 0,000376 |
| POLR2J   | 1,442296 | 1,16E-08 |
| DHX29    | 1,441889 | 3,84E-08 |
| PPP1R13B | 1,441111 | 8,33E-07 |
| ERCC4    | 1,440013 | 0,000252 |

|          |          |          |
|----------|----------|----------|
| TRIM28   | 1,439081 | 1,26E-12 |
| TOP1     | 1,438726 | 1,01E-14 |
| FAM134C  | 1,438041 | 8,71E-08 |
| DHPS     | 1,437503 | 2,26E-10 |
| ATP5I    | 1,437483 | 4,35E-13 |
| TSPAN17  | 1,437025 | 1,14E-06 |
| TMEM231  | 1,435783 | 1,06E-05 |
| GEMIN5   | 1,435278 | 4,88E-12 |
| WWP1     | 1,434779 | 0,000158 |
| KBTBD6   | 1,434659 | 4,74E-08 |
| GPN3     | 1,433713 | 7,67E-06 |
| ATP8B1   | 1,433191 | 2,41E-07 |
| PRMT5    | 1,432221 | 4,70E-12 |
| DDB1     | 1,431467 | 3,12E-07 |
| TSC22D1  | 1,431329 | 1,25E-06 |
| ZNF273   | 1,431183 | 0,00041  |
| MGMT     | 1,43071  | 1,86E-05 |
| SLC5A6   | 1,430352 | 9,36E-06 |
| PRDM4    | 1,428717 | 6,97E-15 |
| ZNRF1    | 1,427932 | 2,28E-11 |
| OAZ2     | 1,424151 | 4,13E-07 |
| ATG14    | 1,423419 | 0,000155 |
| TUFM     | 1,422227 | 3,02E-11 |
| ALKBH7   | 1,422226 | 2,52E-08 |
| SGPL1    | 1,420991 | 2,44E-10 |
| INCENP   | 1,420979 | 2,46E-09 |
| CNNM3    | 1,420368 | 4,90E-08 |
| PACS2    | 1,415982 | 3,21E-11 |
| CMTR2    | 1,415341 | 3,00E-07 |
| AP5S1    | 1,415166 | 2,23E-07 |
| RBM8A    | 1,414625 | 7,82E-12 |
| SLC25A1  | 1,413472 | 6,83E-07 |
| GCA      | 1,412324 | 4,78E-05 |
| EIF4EBP2 | 1,412174 | 4,76E-06 |
| NUBP2    | 1,410217 | 2,30E-10 |
| SETD6    | 1,409432 | 0,000369 |
| ATIC     | 1,408811 | 1,75E-14 |
| CYP51A1  | 1,407572 | 3,63E-13 |
| RINT1    | 1,404787 | 3,33E-06 |
| ACAA1    | 1,404219 | 0,000197 |
| DPY19L3  | 1,403122 | 2,22E-06 |
| CLCC1    | 1,401977 | 5,14E-07 |
| PNPO     | 1,399825 | 1,72E-09 |
| FANCL    | 1,398884 | 0,000885 |
| RXRβ     | 1,39617  | 0,000356 |
| MARCKSL1 | 1,395911 | 5,36E-15 |
| USP38    | 1,393694 | 5,37E-06 |
| KIAA0556 | 1,393675 | 1,89E-07 |
| HRSP12   | 1,3936   | 0,000282 |
| PRR11    | 1,393008 | 2,12E-08 |

|          |          |          |
|----------|----------|----------|
| RCOR1    | 1,390702 | 3,24E-08 |
| TSPYL1   | 1,390692 | 3,16E-07 |
| KIZ      | 1,390021 | 0,000562 |
| NRDE2    | 1,389538 | 2,32E-05 |
| PCGF3    | 1,388204 | 1,44E-10 |
| CCDC117  | 1,386835 | 8,77E-05 |
| PAK2     | 1,385159 | 1,59E-11 |
| REST     | 1,384547 | 3,51E-06 |
| GSTCD    | 1,383693 | 0,000106 |
| ACSL3    | 1,38337  | 4,51E-05 |
| DECR2    | 1,383308 | 2,25E-06 |
| FXR1     | 1,381582 | 1,12E-07 |
| LANCL1   | 1,380735 | 5,62E-07 |
| PAX8-AS1 | 1,380526 | 4,90E-05 |
| VMP1     | 1,379565 | 4,71E-07 |
| FAM168A  | 1,379073 | 2,75E-06 |
| C14orf1  | 1,377467 | 0,000711 |
| SNRPE    | 1,375647 | 1,55E-13 |
| CASP6    | 1,374165 | 1,32E-05 |
| UBB      | 1,371921 | 3,99E-11 |
| RPL35A   | 1,371857 | 2,89E-08 |
| MDH2     | 1,368961 | 1,01E-09 |
| THOC6    | 1,36739  | 0,000137 |
| SARAF    | 1,367111 | 3,94E-08 |
| CAPN7    | 1,365735 | 5,85E-08 |
| METTTL14 | 1,365124 | 0,000302 |
| POLR3GL  | 1,364345 | 6,12E-05 |
| NUBPL    | 1,362999 | 0,000143 |
| PYCARD   | 1,362753 | 0,000665 |
| APOA1BP  | 1,362523 | 7,48E-09 |
| TMEM101  | 1,360488 | 1,24E-06 |
| HEXIM1   | 1,35982  | 8,03E-06 |
| BCL6     | 1,358281 | 0,000185 |
| NDUFC1   | 1,358095 | 3,65E-07 |
| SLC19A2  | 1,357057 | 0,000528 |
| KIAA0101 | 1,355734 | 1,34E-07 |
| MAPK8IP1 | 1,355351 | 2,03E-06 |
| BIRC5    | 1,354321 | 3,94E-05 |
| HS6ST1   | 1,352794 | 1,39E-07 |
| PAPOLA   | 1,352557 | 1,05E-11 |
| NOM1     | 1,349502 | 1,01E-06 |
| CHTF8    | 1,348731 | 1,16E-09 |
| TYSND1   | 1,348544 | 3,47E-08 |
| CHD8     | 1,348377 | 3,38E-08 |
| MXD3     | 1,347869 | 0,000107 |
| TCTN1    | 1,347641 | 6,86E-06 |
| TMEM251  | 1,347494 | 4,84E-07 |
| CHMP2B   | 1,346928 | 1,30E-08 |
| COX14    | 1,346842 | 5,21E-06 |
| PEX13    | 1,346404 | 0,000255 |

|          |          |          |
|----------|----------|----------|
| HYAL2    | 1,34626  | 3,31E-09 |
| PPP2R5E  | 1,345812 | 1,43E-11 |
| BBS10    | 1,345413 | 0,000381 |
| TRAF4    | 1,344913 | 1,72E-10 |
| ZBTB6    | 1,344903 | 0,000189 |
| TRIP11   | 1,342515 | 2,01E-08 |
| NCAPG2   | 1,341047 | 2,71E-08 |
| PSMD4    | 1,340787 | 3,66E-11 |
| SS18L1   | 1,340449 | 0,000361 |
| HECTD1   | 1,340403 | 2,85E-11 |
| GPATCH2  | 1,339136 | 3,41E-06 |
| SREBF2   | 1,338984 | 6,24E-10 |
| LTA4H    | 1,337675 | 2,83E-07 |
| ZNF592   | 1,337101 | 7,65E-07 |
| XXYL1    | 1,332432 | 1,27E-09 |
| NUMA1    | 1,331581 | 2,42E-11 |
| SLF1     | 1,330417 | 0,000406 |
| NAAA     | 1,329781 | 0,001001 |
| FBXO34   | 1,329406 | 8,75E-07 |
| ETNK1    | 1,328154 | 3,60E-05 |
| FADS2    | 1,327203 | 0,000199 |
| TAF6L    | 1,326101 | 3,46E-05 |
| ECE2     | 1,325018 | 2,38E-05 |
| SLC25A40 | 1,324173 | 0,000182 |
| NDUFB5   | 1,323333 | 1,75E-05 |
| TRAP1    | 1,322545 | 4,57E-11 |
| TELO2    | 1,321965 | 3,51E-07 |
| SORD     | 1,321902 | 1,75E-11 |
| KIAA0141 | 1,321662 | 7,65E-07 |
| P4HTM    | 1,321523 | 1,50E-05 |
| ZNF718   | 1,320868 | 0,000192 |
| AURKA    | 1,320276 | 1,17E-08 |
| LMLN     | 1,320231 | 0,000122 |
| ARL6IP1  | 1,319145 | 3,12E-10 |
| CDCA4    | 1,319108 | 0,000265 |
| TECPR2   | 1,318749 | 2,30E-05 |
| ZNF783   | 1,318257 | 0,00015  |
| WDR83OS  | 1,316517 | 3,52E-10 |
| ACOX3    | 1,315738 | 0,000236 |
| TRMT2B   | 1,314075 | 1,52E-05 |
| EDC3     | 1,313587 | 1,12E-06 |
| ADIPOR1  | 1,313432 | 2,27E-05 |
| RIOK2    | 1,313322 | 6,91E-08 |
| KIF22    | 1,313112 | 6,99E-05 |
| FLYWCH2  | 1,312794 | 1,46E-06 |
| SLC20A2  | 1,310602 | 3,74E-06 |
| GPD1L    | 1,310551 | 6,76E-05 |
| HNRNP1L  | 1,310284 | 1,04E-07 |
| ALDOC    | 1,30971  | 0,0007   |
| RNMTL1   | 1,308092 | 6,80E-06 |



|          |          |          |
|----------|----------|----------|
| CPSF2    | 1,307952 | 3,55E-10 |
| PCCB     | 1,307547 | 1,29E-07 |
| SOCS7    | 1,306699 | 0,000976 |
| DCUN1D1  | 1,306432 | 3,60E-05 |
| CENPH    | 1,305474 | 0,000608 |
| SNHG16   | 1,303693 | 9,11E-11 |
| ARHGEF16 | 1,302929 | 0,000536 |
| EVL      | 1,302679 | 2,09E-06 |
| HMGCR    | 1,301461 | 2,82E-08 |
| YLPM1    | 1,301027 | 1,36E-09 |
| HMGN1    | 1,300111 | 5,69E-12 |
| AKAP1    | 1,299846 | 4,02E-07 |
| POLR2A   | 1,299807 | 1,67E-12 |
| ITFG3    | 1,299671 | 9,97E-06 |
| RBMX     | 1,297676 | 9,97E-08 |
| ARFIP2   | 1,296568 | 8,71E-06 |
| ALKBH2   | 1,296374 | 1,15E-06 |
| EEF1G    | 1,296362 | 1,31E-13 |
| GALK1    | 1,296142 | 1,74E-05 |
| CRNKL1   | 1,295099 | 1,28E-05 |
| ADPRHL1  | 1,294181 | 0,000865 |
| THAP11   | 1,294111 | 1,78E-05 |
| ZNF607   | 1,2936   | 0,000413 |
| TNRC6A   | 1,292037 | 7,75E-07 |
| SLC7A5   | 1,291531 | 8,91E-10 |
| COX17    | 1,29045  | 0,000355 |
| MIDN     | 1,290098 | 4,62E-09 |
| GFOD2    | 1,289355 | 3,72E-05 |
| PGP      | 1,288156 | 7,16E-08 |
| METTL16  | 1,287127 | 1,88E-08 |
| PLA2G12A | 1,285576 | 1,57E-05 |
| ZBTB1    | 1,284149 | 2,15E-08 |
| SLC25A38 | 1,283504 | 3,23E-07 |
| AMZ2     | 1,282364 | 4,90E-05 |
| COX11    | 1,281683 | 0,000299 |
| VPS25    | 1,281216 | 1,35E-08 |
| CISD3    | 1,280727 | 0,000255 |
| ZBTB9    | 1,280236 | 2,98E-07 |
| MAP2K5   | 1,279888 | 4,04E-06 |
| CMC1     | 1,279533 | 0,000256 |
| ATP5J2   | 1,27656  | 1,55E-05 |
| HIF1A    | 1,275344 | 2,71E-10 |
| TOMM6    | 1,275223 | 3,73E-11 |
| CBWD2    | 1,272563 | 1,95E-05 |
| CPSF4    | 1,272375 | 0,000429 |
| ARMT1    | 1,27085  | 6,44E-08 |
| NCBP1    | 1,269894 | 8,21E-10 |
| LPCAT1   | 1,268922 | 8,22E-07 |
| SUCLG1   | 1,267811 | 1,30E-09 |
| ZNF322   | 1,267427 | 0,000253 |

|         |          |          |
|---------|----------|----------|
| ZNF614  | 1,265344 | 0,000385 |
| RPS27   | 1,265331 | 3,27E-05 |
| STIM2   | 1,264542 | 1,31E-06 |
| ATXN7   | 1,263339 | 4,75E-06 |
| PLCB1   | 1,26273  | 0,000611 |
| GEMIN2  | 1,262287 | 0,000267 |
| CLOCK   | 1,262274 | 1,72E-06 |
| TET3    | 1,260659 | 1,13E-08 |
| VPS13A  | 1,259199 | 4,95E-05 |
| NARFL   | 1,258766 | 5,68E-05 |
| SCAP    | 1,255135 | 5,59E-06 |
| EMC9    | 1,255015 | 0,000231 |
| PIGX    | 1,254955 | 8,96E-08 |
| CHCHD10 | 1,254216 | 9,72E-09 |
| MAPK13  | 1,253686 | 2,81E-07 |
| ATF6B   | 1,25243  | 7,87E-08 |
| RHNO1   | 1,252408 | 2,63E-05 |
| FAM122B | 1,251379 | 1,52E-06 |
| SHFM1   | 1,251091 | 3,74E-10 |
| NUSAP1  | 1,251022 | 8,03E-06 |
| FDFT1   | 1,250176 | 1,45E-05 |
| MAML1   | 1,249439 | 1,86E-06 |
| LEMD3   | 1,249196 | 1,85E-07 |
| UBR7    | 1,248824 | 7,38E-08 |
| C1orf43 | 1,248756 | 2,18E-09 |
| TRAPPC9 | 1,248003 | 0,000617 |
| CNOT2   | 1,247177 | 1,09E-09 |
| ITPK1   | 1,246647 | 2,91E-11 |
| RNF115  | 1,246283 | 2,66E-08 |
| HDHD2   | 1,245454 | 0,000252 |
| MAL2    | 1,245304 | 4,55E-08 |
| PROSER3 | 1,244905 | 9,50E-05 |
| TRMT10C | 1,243779 | 6,59E-07 |
| CUL7    | 1,243416 | 5,30E-05 |
| HAGHL   | 1,243169 | 2,12E-05 |
| POMT1   | 1,242573 | 0,000977 |
| SH2B1   | 1,242175 | 0,000876 |
| GEMIN4  | 1,241332 | 8,46E-08 |
| OXNAD1  | 1,24086  | 5,13E-05 |
| GATC    | 1,239344 | 4,06E-08 |
| MSRB2   | 1,237691 | 8,42E-07 |
| FANCD2  | 1,237158 | 1,58E-05 |
| SUMO3   | 1,236086 | 7,68E-11 |
| MSH3    | 1,235645 | 3,10E-06 |
| MREG    | 1,23485  | 2,75E-06 |
| FAM217B | 1,233699 | 1,38E-05 |
| PMS2P1  | 1,233199 | 0,000255 |
| CCNB1   | 1,232873 | 1,83E-08 |
| MTSS1L  | 1,232725 | 1,27E-05 |
| UBP1    | 1,232712 | 6,30E-08 |

|          |          |          |
|----------|----------|----------|
| ATP5G2   | 1,232457 | 1,59E-10 |
| RASA1    | 1,230847 | 4,70E-05 |
| THOC3    | 1,230315 | 0,000123 |
| JMJD8    | 1,230209 | 1,66E-07 |
| LAMTOR2  | 1,229904 | 7,34E-07 |
| RNF168   | 1,229775 | 1,69E-08 |
| AUTS2    | 1,229445 | 0,000215 |
| MKI67    | 1,228997 | 6,13E-09 |
| PDCD4    | 1,228866 | 3,20E-06 |
| DPY19L1  | 1,225994 | 0,000306 |
| RNF123   | 1,225713 | 7,18E-05 |
| PRKAR1A  | 1,22448  | 5,20E-09 |
| SPATS2   | 1,223352 | 1,53E-06 |
| LETMD1   | 1,222458 | 3,32E-07 |
| POLR2G   | 1,220925 | 8,23E-09 |
| DIS3L    | 1,220881 | 4,46E-05 |
| GTF2A1   | 1,219848 | 1,20E-07 |
| RFK      | 1,217075 | 1,22E-05 |
| LRCH3    | 1,216121 | 8,63E-05 |
| CENPE    | 1,214382 | 7,56E-05 |
| ARF5     | 1,213618 | 4,62E-10 |
| NDUFS2   | 1,210834 | 3,09E-05 |
| NSF      | 1,210545 | 0,000489 |
| MRPL12   | 1,210074 | 2,84E-09 |
| ACSF3    | 1,210067 | 3,02E-07 |
| PYCR1    | 1,20859  | 1,74E-05 |
| ARVCF    | 1,206094 | 0,000351 |
| PAFAH1B3 | 1,205097 | 9,37E-06 |
| IFT46    | 1,204674 | 5,61E-07 |
| CHRNA5   | 1,204471 | 1,84E-06 |
| IER5     | 1,204003 | 4,53E-05 |
| SMYD5    | 1,199818 | 4,18E-07 |
| CDC42SE1 | 1,199488 | 6,21E-07 |
| STX17    | 1,198314 | 3,94E-06 |
| TMED3    | 1,196104 | 2,97E-06 |
| VPRBP    | 1,194958 | 8,07E-07 |
| SMARCC2  | 1,194805 | 1,31E-09 |
| SCAF8    | 1,193184 | 0,000229 |
| SFXN1    | 1,191878 | 3,69E-06 |
| PCDH1    | 1,191505 | 0,000202 |
| SOS1     | 1,190686 | 5,96E-06 |
| CHMP1B   | 1,190306 | 4,92E-07 |
| ZNF740   | 1,189712 | 0,000994 |
| CUL3     | 1,188929 | 6,72E-08 |
| PHF10    | 1,18739  | 8,53E-05 |
| NDUFAF7  | 1,185858 | 0,000477 |
| SCOC     | 1,185115 | 0,000257 |
| ZNF646   | 1,184286 | 8,87E-07 |
| RNF40    | 1,184128 | 7,96E-07 |
| KDM3B    | 1,183471 | 1,31E-07 |

|          |          |          |
|----------|----------|----------|
| PRR14L   | 1,182613 | 4,17E-08 |
| ELF2     | 1,181337 | 0,000159 |
| GTF3C1   | 1,181256 | 0,000126 |
| TXN2     | 1,181197 | 0,000157 |
| LSM3     | 1,180799 | 2,69E-06 |
| SLC25A13 | 1,179708 | 1,13E-05 |
| ZNF260   | 1,17958  | 5,04E-05 |
| UQCC2    | 1,179546 | 8,72E-05 |
| MAVS     | 1,179132 | 2,43E-06 |
| CSTF2T   | 1,178265 | 1,38E-05 |
| TNK1     | 1,177751 | 9,90E-05 |
| FAM120B  | 1,173693 | 0,000113 |
| TMEM241  | 1,173473 | 0,000555 |
| COA4     | 1,173259 | 9,42E-09 |
| TMEM2    | 1,17293  | 2,92E-05 |
| PPM1B    | 1,172509 | 6,01E-05 |
| ATMIN    | 1,172473 | 8,39E-09 |
| ZBTB33   | 1,17208  | 0,00054  |
| PREPL    | 1,171741 | 4,46E-06 |
| LSG1     | 1,171601 | 7,94E-08 |
| WDR48    | 1,170793 | 0,000635 |
| CCBL2    | 1,168214 | 0,000651 |
| BCKDHA   | 1,166088 | 2,08E-05 |
| RBM4     | 1,165711 | 3,92E-07 |
| MRPS27   | 1,165555 | 5,20E-08 |
| SNRNP48  | 1,165134 | 4,47E-05 |
| MRPL42   | 1,164356 | 3,55E-05 |
| RECQL5   | 1,161213 | 3,19E-05 |
| RPL32    | 1,16078  | 2,57E-07 |
| FANCG    | 1,160681 | 0,000289 |
| HIGD2A   | 1,158269 | 1,91E-06 |
| KCTD13   | 1,156896 | 0,000453 |
| NAA38    | 1,156185 | 1,22E-06 |
| SLC35E2B | 1,156015 | 9,81E-06 |
| H3F3AP4  | 1,15543  | 3,75E-06 |
| SMTN     | 1,154575 | 7,79E-07 |
| JTB      | 1,152911 | 1,54E-06 |
| PRPF8    | 1,15152  | 7,35E-08 |
| GPSM2    | 1,150346 | 1,74E-07 |
| PSMC5    | 1,149171 | 4,20E-06 |
| NUDT14   | 1,14489  | 6,98E-05 |
| NBR1     | 1,1435   | 0,000422 |
| TRAPPC4  | 1,143156 | 1,27E-05 |
| TRIM56   | 1,143143 | 0,000676 |
| ZNF627   | 1,142445 | 1,11E-05 |
| ZMYND8   | 1,141562 | 1,33E-07 |
| ZNF346   | 1,141179 | 0,000573 |
| SLC25A15 | 1,140864 | 5,64E-06 |
| DHX8     | 1,140549 | 0,000209 |
| PPP4R3A  | 1,140546 | 3,74E-09 |

|          |          |          |
|----------|----------|----------|
| C16orf13 | 1,139215 | 2,91E-06 |
| AVL9     | 1,138983 | 4,44E-08 |
| RFX7     | 1,137923 | 8,65E-05 |
| RPL21    | 1,137358 | 2,61E-07 |
| DARS2    | 1,13711  | 3,91E-08 |
| POLR1D   | 1,136978 | 1,73E-08 |
| TNRC18   | 1,136708 | 1,49E-07 |
| SETD5    | 1,135578 | 3,11E-05 |
| SETD1A   | 1,13506  | 6,15E-06 |
| GPHN     | 1,133969 | 2,65E-05 |
| DCTN5    | 1,133418 | 0,000173 |
| ELP5     | 1,133122 | 9,99E-07 |
| PIK3R4   | 1,130281 | 5,31E-05 |
| LDLR     | 1,130251 | 2,01E-06 |
| UBE2T    | 1,129872 | 7,79E-07 |
| DNAJC2   | 1,129665 | 3,04E-07 |
| POP5     | 1,129207 | 0,000516 |
| MED21    | 1,129081 | 0,000181 |
| CHCHD4   | 1,128929 | 0,000988 |
| ZNF689   | 1,127103 | 0,000348 |
| IMP3     | 1,127061 | 2,32E-07 |
| DNAJC30  | 1,127015 | 1,56E-05 |
| SNRPA1   | 1,12647  | 1,00E-07 |
| TDG      | 1,126411 | 1,60E-06 |
| BCL9L    | 1,126139 | 0,000102 |
| ETFB     | 1,124818 | 0,000715 |
| CRACR2B  | 1,12473  | 0,000724 |
| SNN      | 1,123573 | 0,000431 |
| DAG1     | 1,123188 | 2,23E-05 |
| FAM195A  | 1,121782 | 1,25E-06 |
| MRPL53   | 1,121691 | 0,000761 |
| METTL9   | 1,121533 | 2,03E-08 |
| PDE7A    | 1,121482 | 0,000263 |
| KITLG    | 1,121068 | 4,95E-06 |
| OPA1     | 1,119001 | 1,43E-06 |
| STRN3    | 1,117751 | 1,51E-05 |
| CTDSPL   | 1,117594 | 0,000102 |
| ATP2C1   | 1,116917 | 3,10E-08 |
| WDR20    | 1,115811 | 1,59E-05 |
| TRPT1    | 1,115072 | 0,000869 |
| MRPL57   | 1,114994 | 2,43E-07 |
| SFXN4    | 1,114673 | 4,20E-06 |
| C20orf27 | 1,114515 | 5,35E-07 |
| THOC2    | 1,114303 | 6,66E-07 |
| ZNF701   | 1,11233  | 0,000878 |
| METAP1   | 1,110596 | 2,91E-06 |
| ALDH7A1  | 1,110244 | 1,23E-06 |
| SNAPIN   | 1,108446 | 2,78E-05 |
| NCAPD3   | 1,108087 | 0,000265 |
| RPIA     | 1,107928 | 6,99E-05 |

|          |          |          |
|----------|----------|----------|
| PPP4R2   | 1,10526  | 1,47E-06 |
| COQ2     | 1,104729 | 4,75E-05 |
| TRMT112  | 1,104185 | 4,68E-05 |
| MSH6     | 1,103499 | 1,45E-08 |
| HMGN3    | 1,103493 | 5,91E-05 |
| MCM4     | 1,103443 | 3,70E-07 |
| MAT2B    | 1,103419 | 0,000825 |
| C19orf54 | 1,103302 | 0,000197 |
| VEZF1    | 1,102749 | 6,34E-06 |
| ABCE1    | 1,102423 | 5,79E-07 |
| BTBD3    | 1,101842 | 0,00065  |
| AP5M1    | 1,100788 | 0,000686 |
| ZNF638   | 1,100458 | 9,26E-07 |
| ATPAF1   | 1,099165 | 4,17E-05 |
| NTHL1    | 1,098877 | 0,000214 |
| CENPU    | 1,098731 | 0,00096  |
| FAM110A  | 1,098349 | 0,000491 |
| TAF8     | 1,097753 | 0,000523 |
| C17orf85 | 1,096165 | 9,66E-06 |
| ANP32B   | 1,096142 | 4,92E-06 |
| CDK8     | 1,09555  | 5,91E-06 |
| ANKRD28  | 1,0941   | 1,44E-06 |
| RRBP1    | 1,093572 | 0,000642 |
| AHCY     | 1,091541 | 4,38E-05 |
| BCL9     | 1,090854 | 2,47E-05 |
| TACC3    | 1,089866 | 0,00012  |
| CBX5     | 1,089753 | 9,92E-06 |
| GOT2     | 1,088644 | 1,45E-05 |
| ARFGAP2  | 1,087873 | 5,16E-06 |
| SFI1     | 1,087567 | 0,000686 |
| DCAF16   | 1,08713  | 0,000173 |
| C16orf58 | 1,084876 | 1,07E-07 |
| CMTM4    | 1,084477 | 2,78E-07 |
| SPRYD3   | 1,082825 | 1,44E-05 |
| NUP160   | 1,081675 | 8,21E-06 |
| PDS5A    | 1,081151 | 2,78E-06 |
| PMVK     | 1,080662 | 5,34E-05 |
| RPSAP58  | 1,080164 | 7,53E-06 |
| PMPCB    | 1,078867 | 1,19E-07 |
| PSMB4    | 1,078137 | 3,27E-06 |
| CLUH     | 1,075497 | 5,61E-07 |
| DHX38    | 1,075474 | 2,51E-06 |
| POLR1A   | 1,074099 | 8,08E-06 |
| CKB      | 1,072861 | 0,000757 |
| TCF3     | 1,072688 | 5,32E-08 |
| FAF2     | 1,072512 | 5,56E-07 |
| NADK2    | 1,07246  | 4,75E-05 |
| SPIDR    | 1,071744 | 5,01E-05 |
| AFG3L1P  | 1,069227 | 0,000622 |
| IMPA2    | 1,069203 | 1,21E-05 |

|         |          |          |
|---------|----------|----------|
| SPAST   | 1,063121 | 0,00052  |
| ASH1L   | 1,062572 | 1,87E-07 |
| CFDP1   | 1,061949 | 2,64E-06 |
| FANCA   | 1,061018 | 7,71E-06 |
| MCM3    | 1,059622 | 8,77E-06 |
| C5orf22 | 1,058821 | 4,71E-05 |
| TMEM5   | 1,058431 | 6,27E-06 |
| IPO4    | 1,057625 | 3,67E-06 |
| CCND1   | 1,056248 | 9,44E-05 |
| MEAF6   | 1,055935 | 0,00078  |
| QTRTD1  | 1,055452 | 7,01E-05 |
| CHMP1A  | 1,054981 | 0,000102 |
| PPIL1   | 1,054627 | 2,53E-06 |
| RPS18   | 1,0543   | 0,000518 |
| USP22   | 1,053916 | 1,33E-06 |
| PAPSS1  | 1,052014 | 0,00039  |
| PSPC1   | 1,051442 | 5,17E-06 |
| EXD2    | 1,051429 | 5,82E-06 |
| RPL15   | 1,05007  | 7,76E-08 |
| SNX5    | 1,049908 | 2,78E-05 |
| CCAR2   | 1,049541 | 3,09E-05 |
| MAGEF1  | 1,04911  | 8,20E-06 |
| KPNA2   | 1,048603 | 9,43E-07 |
| EHMT1   | 1,048385 | 3,95E-05 |
| DEPDC5  | 1,047005 | 0,000209 |
| TRIM36  | 1,04516  | 0,000955 |
| NKRF    | 1,044793 | 1,49E-05 |
| STON2   | 1,043812 | 8,16E-05 |
| CSTF1   | 1,040708 | 4,04E-06 |
| ZNF398  | 1,039126 | 1,64E-06 |
| TNNT1   | 1,038009 | 5,22E-07 |
| PDAP1   | 1,03787  | 2,64E-07 |
| ANP32E  | 1,037738 | 3,87E-06 |
| METTL6  | 1,037665 | 6,40E-05 |
| KLHDC4  | 1,037369 | 1,44E-05 |
| KMT2C   | 1,036212 | 4,03E-07 |
| GRB2    | 1,035887 | 5,76E-08 |
| RAB4A   | 1,035526 | 0,0001   |
| LIG1    | 1,035297 | 2,08E-06 |
| AGGF1   | 1,034894 | 1,47E-05 |
| MRFAP1  | 1,033714 | 1,27E-06 |
| MTA2    | 1,03322  | 2,16E-07 |
| TATDN1  | 1,033108 | 5,47E-06 |
| ERI2    | 1,032915 | 0,00031  |
| ZNF616  | 1,032787 | 0,000191 |
| RPL23A  | 1,032174 | 1,51E-07 |
| UBQLN4  | 1,031384 | 1,50E-06 |
| TSFM    | 1,029812 | 6,43E-05 |
| SLC7A11 | 1,028523 | 0,000447 |
| SP1     | 1,027297 | 3,68E-06 |

|          |          |          |
|----------|----------|----------|
| ERBB2IP  | 1,026729 | 1,14E-05 |
| TCTN3    | 1,025199 | 7,84E-05 |
| NDUFA2   | 1,023191 | 0,000148 |
| SUPT16H  | 1,022944 | 2,37E-08 |
| THADA    | 1,022529 | 0,000173 |
| FAHD1    | 1,02243  | 2,66E-06 |
| POLB     | 1,020936 | 0,000806 |
| SLC25A39 | 1,020862 | 6,03E-08 |
| SDHD     | 1,020516 | 0,000209 |
| C6orf136 | 1,018946 | 0,000697 |
| NFYA     | 1,017656 | 0,000255 |
| TSEN54   | 1,017545 | 0,00011  |
| SLC50A1  | 1,014836 | 3,15E-05 |
| MRPL10   | 1,01411  | 7,15E-05 |
| TOMM70A  | 1,01328  | 1,12E-06 |
| DYM      | 1,01294  | 1,27E-05 |
| CDC25B   | 1,012934 | 1,60E-05 |
| ZNF764   | 1,012443 | 0,000904 |
| CCNA2    | 1,011935 | 4,35E-06 |
| FBXO9    | 1,011894 | 2,16E-05 |
| WWP2     | 1,011845 | 0,00027  |
| IQSEC1   | 1,011795 | 6,34E-05 |
| PSMD12   | 1,010826 | 0,0003   |
| GRHPR    | 1,009347 | 0,000781 |
| RPP30    | 1,009223 | 0,000664 |
| DCLRE1B  | 1,007766 | 0,000175 |
| NDUFA3   | 1,007697 | 0,000236 |
| MBD4     | 1,00757  | 0,00019  |
| RAF1     | 1,006101 | 4,62E-06 |
| FBXO45   | 1,005607 | 0,000691 |
| ZCCHC14  | 1,005412 | 1,37E-06 |
| HNRNPH1  | 1,005066 | 8,54E-05 |
| RPSA     | 1,004963 | 2,54E-07 |
| FLOT2    | 1,004713 | 0,000226 |
| TRAPPC2L | 1,004521 | 9,67E-06 |
| TUBG1    | 1,002882 | 1,43E-05 |
| ACTL6A   | 1,002552 | 1,24E-05 |
| TMEM184C | 1,001715 | 4,98E-05 |
| GRK6     | 1,001278 | 0,000204 |
| USP19    | 1,000682 | 0,000643 |
| DUS1L    | 1,000559 | 8,59E-05 |
| PSMD7    | 0,998745 | 4,98E-07 |
| SOCS4    | 0,99533  | 0,000903 |
| C7orf73  | 0,994679 | 6,75E-06 |
| TROVE2   | 0,993835 | 0,000962 |
| RPL34    | 0,993274 | 1,13E-05 |
| C5orf30  | 0,992758 | 0,000338 |
| SUV420H1 | 0,99239  | 1,14E-05 |
| SEPHS1   | 0,992285 | 0,000119 |
| WDR60    | 0,991881 | 0,000275 |



|          |          |          |
|----------|----------|----------|
| NFATC3   | 0,991524 | 1,66E-05 |
| ZNF148   | 0,990391 | 1,32E-05 |
| ZCRB1    | 0,990386 | 8,96E-05 |
| MRPS7    | 0,99021  | 6,17E-05 |
| TBC1D24  | 0,988809 | 0,000782 |
| XPO1     | 0,988672 | 1,72E-05 |
| FAM189B  | 0,987079 | 0,000634 |
| HACD3    | 0,986369 | 1,59E-07 |
| RNASEH2A | 0,986225 | 1,85E-06 |
| ARRDC1   | 0,983377 | 5,64E-05 |
| HNRNPAB  | 0,981211 | 1,82E-07 |
| RPL4     | 0,978881 | 3,19E-07 |
| NSDHL    | 0,977942 | 3,55E-05 |
| IP6K2    | 0,976103 | 0,000989 |
| ATL3     | 0,975518 | 2,04E-06 |
| NPM1     | 0,974338 | 1,50E-07 |
| USP6NL   | 0,973844 | 3,44E-05 |
| CPSF6    | 0,973359 | 2,14E-07 |
| MSH2     | 0,973338 | 1,15E-05 |
| TBK1     | 0,973136 | 0,000916 |
| MLST8    | 0,972182 | 7,06E-06 |
| UBAC1    | 0,97205  | 2,65E-05 |
| HNRNPA0  | 0,969564 | 2,39E-05 |
| TTLL5    | 0,969136 | 3,15E-05 |
| RPS2     | 0,968945 | 1,15E-07 |
| KIF2A    | 0,968795 | 4,39E-06 |
| SYTL2    | 0,968772 | 0,000517 |
| CDT1     | 0,968347 | 0,000905 |
| UBR2     | 0,968076 | 5,82E-05 |
| TTC19    | 0,967264 | 5,41E-05 |
| KIF11    | 0,966865 | 5,52E-06 |
| KRIT1    | 0,964069 | 0,000577 |
| ZFYVE21  | 0,961989 | 0,000141 |
| LDB1     | 0,958544 | 2,62E-05 |
| G3BP2    | 0,9578   | 0,000321 |
| PIP5K1A  | 0,955671 | 0,000555 |
| SETD3    | 0,955643 | 8,41E-06 |
| ASUN     | 0,955639 | 6,99E-05 |
| SF3B4    | 0,955397 | 5,34E-08 |
| HNRNPA1  | 0,955043 | 4,16E-07 |
| TMEM167  | 0,952657 | 0,000319 |
| RMND1    | 0,952212 | 0,000126 |
| SMG7     | 0,952203 | 2,69E-07 |
| CETN2    | 0,951547 | 6,33E-05 |
| VPS37C   | 0,950809 | 0,000253 |
| KLHL42   | 0,950041 | 0,000553 |
| USP39    | 0,947852 | 1,12E-06 |
| RCN2     | 0,947265 | 3,86E-05 |
| ATP5H    | 0,947121 | 7,07E-05 |
| APH1A    | 0,946785 | 5,41E-06 |

|          |          |          |
|----------|----------|----------|
| KDM1A    | 0,946242 | 5,99E-06 |
| SLC25A5  | 0,946022 | 0,000665 |
| PHKG2    | 0,945826 | 0,000125 |
| PCF11    | 0,945778 | 0,000665 |
| CLCN3    | 0,945623 | 3,30E-05 |
| ILF2     | 0,944779 | 1,30E-07 |
| GMPR2    | 0,943688 | 0,00039  |
| CREBBP   | 0,941467 | 0,000148 |
| SLC6A6   | 0,940249 | 2,22E-05 |
| CMTM6    | 0,939202 | 0,000443 |
| HOXC10   | 0,937456 | 0,000291 |
| METRNL   | 0,937411 | 0,00027  |
| NIT2     | 0,93741  | 0,000132 |
| SUMO2    | 0,936673 | 1,24E-06 |
| CUX1     | 0,935975 | 1,14E-05 |
| FXR2     | 0,935114 | 6,04E-05 |
| ERAL1    | 0,934722 | 1,83E-05 |
| PIGG     | 0,934679 | 0,001012 |
| NDUFB4   | 0,9337   | 1,78E-05 |
| TBC1D9B  | 0,933636 | 9,05E-06 |
| MATR3    | 0,932048 | 5,04E-07 |
| TBC1D14  | 0,932007 | 0,000104 |
| CUL9     | 0,931709 | 0,000299 |
| USP42    | 0,930455 | 0,000398 |
| POLR3E   | 0,928508 | 0,000137 |
| PPP2R5C  | 0,928219 | 2,02E-05 |
| FAM120AC | 0,92715  | 0,000135 |
| PNMA1    | 0,92702  | 0,000539 |
| NDUFV3   | 0,926618 | 1,18E-05 |
| DGCR6L   | 0,926341 | 3,64E-05 |
| PLK4     | 0,925722 | 0,000535 |
| MARCH6   | 0,925395 | 0,000268 |
| UBE2K    | 0,924441 | 0,000236 |
| SLC3A2   | 0,923597 | 6,02E-06 |
| ARPC1A   | 0,923558 | 0,000248 |
| PELP1    | 0,921783 | 9,66E-05 |
| RANBP9   | 0,921616 | 0,000178 |
| ZNF24    | 0,91892  | 1,84E-05 |
| THUMPD3  | 0,916723 | 3,78E-05 |
| PTK7     | 0,915465 | 4,94E-05 |
| LDOC1L   | 0,915269 | 1,69E-05 |
| AKAP11   | 0,913476 | 2,64E-05 |
| NDUFS3   | 0,913096 | 3,56E-05 |
| TEX2     | 0,912744 | 1,65E-05 |
| DSC2     | 0,91132  | 0,000194 |
| VPS33B   | 0,910764 | 0,000954 |
| HDGF     | 0,908729 | 2,69E-07 |
| CDCA3    | 0,908422 | 0,000115 |
| CCDC90B  | 0,907717 | 0,00057  |
| USP7     | 0,906089 | 8,78E-07 |

|           |          |          |
|-----------|----------|----------|
| TPBG      | 0,905978 | 2,80E-05 |
| ATP5B     | 0,904058 | 2,09E-05 |
| CLPX      | 0,903883 | 0,000177 |
| SPG21     | 0,903283 | 1,76E-06 |
| MTA3      | 0,901535 | 0,000125 |
| FAM120A   | 0,89682  | 0,000182 |
| CPNE3     | 0,896782 | 3,89E-05 |
| SNRPF     | 0,896608 | 3,97E-05 |
| BRPF3     | 0,894383 | 6,61E-05 |
| MANEAL    | 0,893085 | 0,000911 |
| CSNK1G2   | 0,892617 | 0,000149 |
| PPP6R3    | 0,889418 | 1,09E-05 |
| QARS      | 0,889079 | 1,94E-05 |
| POLA1     | 0,887416 | 0,000612 |
| UQCC3     | 0,887072 | 0,00021  |
| BRCA1     | 0,886475 | 0,000339 |
| RMDN1     | 0,886435 | 0,000434 |
| CCNI      | 0,884386 | 1,69E-06 |
| CKAP5     | 0,884333 | 0,000293 |
| RPL41     | 0,884149 | 1,29E-05 |
| STK38     | 0,883626 | 0,000127 |
| MRPS34    | 0,881822 | 7,74E-06 |
| BCL7C     | 0,881185 | 0,000181 |
| ZNF609    | 0,880111 | 0,000298 |
| DHX9      | 0,87904  | 6,25E-06 |
| NEDD1     | 0,878604 | 0,000122 |
| RBM12     | 0,87801  | 0,000617 |
| MCL1      | 0,877619 | 1,33E-06 |
| SCO1      | 0,877402 | 0,00037  |
| TDP1      | 0,875681 | 0,000202 |
| ACAD9     | 0,875293 | 0,00096  |
| ZNF664    | 0,875195 | 0,000186 |
| PEMT      | 0,874931 | 0,000476 |
| MDC1      | 0,874467 | 3,59E-05 |
| PSMC2     | 0,872628 | 1,40E-05 |
| INPPL1    | 0,872358 | 1,43E-05 |
| SMARCA5   | 0,871532 | 5,19E-06 |
| RHOT2     | 0,871464 | 9,43E-05 |
| POLR2B    | 0,871054 | 1,43E-05 |
| INTS3     | 0,870949 | 4,47E-05 |
| RNF181    | 0,870684 | 0,000657 |
| C14orf166 | 0,870147 | 1,49E-05 |
| CYTH2     | 0,869585 | 7,34E-05 |
| XPO7      | 0,866672 | 0,000238 |
| FBL       | 0,866303 | 1,97E-06 |
| DHX15     | 0,865379 | 0,000162 |
| ECSIT     | 0,865244 | 0,000402 |
| CSNK1G3   | 0,864845 | 0,00072  |
| KCTD20    | 0,864471 | 2,11E-05 |
| BCLAF1    | 0,860609 | 4,41E-06 |

|          |          |          |
|----------|----------|----------|
| AGAP3    | 0,860475 | 0,000741 |
| RPL27    | 0,858281 | 5,84E-06 |
| SENP5    | 0,857994 | 0,000225 |
| ZNF444   | 0,857207 | 0,000761 |
| FAM64A   | 0,855691 | 0,000772 |
| APEX1    | 0,855536 | 7,20E-05 |
| GTF3A    | 0,855228 | 8,52E-06 |
| SUDS3    | 0,853151 | 0,000528 |
| TCEA3    | 0,853033 | 0,000444 |
| GPS1     | 0,852831 | 0,000135 |
| RABGAP1  | 0,851494 | 0,000135 |
| SRPK1    | 0,84989  | 3,02E-05 |
| NAA30    | 0,84675  | 0,000577 |
| AK3      | 0,845702 | 0,000471 |
| MAD2L1   | 0,845141 | 0,000428 |
| RABL6    | 0,843943 | 0,000139 |
| ATP5F1   | 0,84367  | 9,06E-05 |
| F12      | 0,841397 | 0,000453 |
| MRFAP1L1 | 0,839793 | 0,000108 |
| SHROOM3  | 0,839258 | 0,000981 |
| GTPBP6   | 0,838257 | 0,000716 |
| SFPQ     | 0,837331 | 6,45E-06 |
| GNPTAB   | 0,835864 | 0,000557 |
| XRN2     | 0,835717 | 2,92E-05 |
| RNF26    | 0,832892 | 0,000505 |
| TBCD     | 0,827394 | 0,000245 |
| OXA1L    | 0,826768 | 0,000167 |
| GCSH     | 0,825808 | 0,000872 |
| VPS45    | 0,822875 | 0,000855 |
| CTPS2    | 0,821583 | 0,000681 |
| STAG2    | 0,820721 | 6,16E-05 |
| PTMA     | 0,820173 | 6,17E-05 |
| ASPSCR1  | 0,819895 | 0,000651 |
| NDUFS6   | 0,81697  | 0,000482 |
| FANCI    | 0,814383 | 0,000669 |
| GPX4     | 0,812326 | 0,00016  |
| RPL26    | 0,812281 | 6,34E-05 |
| UMPS     | 0,810887 | 0,00033  |
| PRR12    | 0,81044  | 0,000399 |
| FUNDC2   | 0,808983 | 0,000546 |
| RBM28    | 0,808209 | 0,000481 |
| CDC42BPB | 0,807512 | 9,79E-05 |
| MRRF     | 0,807127 | 0,000828 |
| SRGAP2   | 0,806911 | 0,000103 |
| COX6C    | 0,806694 | 0,000332 |
| CNOT7    | 0,803589 | 0,000157 |
| ILVBL    | 0,802567 | 9,55E-05 |
| CASC3    | 0,802126 | 0,000669 |
| UQCRRF51 | 0,800936 | 6,76E-05 |
| JAGN1    | 0,796114 | 0,000702 |

|          |          |          |
|----------|----------|----------|
| GID8     | 0,795571 | 0,000153 |
| EIF4E    | 0,793637 | 0,000546 |
| HTATSF1  | 0,79299  | 0,000484 |
| BTBD7    | 0,792613 | 0,000641 |
| IGF1R    | 0,792179 | 0,000397 |
| KMT2D    | 0,791545 | 4,58E-05 |
| SIPA1L1  | 0,78944  | 0,000175 |
| RBBP5    | 0,788088 | 0,000473 |
| BAG1     | 0,788033 | 0,000316 |
| RTN3     | 0,785221 | 0,00097  |
| AFG3L2   | 0,784678 | 0,000343 |
| BRK1     | 0,783872 | 0,000418 |
| VPS52    | 0,78311  | 8,05E-05 |
| NT5C3B   | 0,780127 | 0,000909 |
| RFWD2    | 0,779421 | 0,000918 |
| MDK      | 0,778592 | 0,000246 |
| SMARCB1  | 0,775794 | 0,000843 |
| BTBD2    | 0,775457 | 0,000159 |
| CANX     | 0,771887 | 0,000138 |
| KARS     | 0,769304 | 0,000267 |
| COX6A1   | 0,768972 | 7,05E-05 |
| PSMB6    | 0,768404 | 0,000689 |
| GON4L    | 0,768254 | 0,000719 |
| MLLT6    | 0,760466 | 0,000431 |
| FGFRL1   | 0,75295  | 0,000941 |
| HN1L     | 0,752686 | 8,35E-05 |
| COPS6    | 0,752608 | 0,000213 |
| SMIM7    | 0,751516 | 0,000757 |
| NOTCH1   | 0,749299 | 0,000351 |
| MAPK1IP1 | 0,742314 | 0,000641 |
| SRRM2    | 0,740818 | 0,000141 |
| MRPS18B  | 0,740362 | 0,000644 |
| CNBP     | 0,740316 | 0,000499 |
| RCC1     | 0,738706 | 0,000611 |
| TLE3     | 0,736123 | 0,000161 |
| SKP1     | 0,7339   | 0,000979 |
| MBTPS1   | 0,733454 | 0,000938 |
| ANKIB1   | 0,732342 | 0,000739 |
| ESYT2    | 0,722508 | 0,000391 |
| RPL7A    | 0,720842 | 6,57E-05 |
| PSME3    | 0,720129 | 0,000265 |
| H2AFZ    | 0,719822 | 0,000874 |
| MORF4L1  | 0,719511 | 0,000688 |
| ATXN7L3  | 0,718595 | 0,000312 |
| SMCHD1   | 0,718125 | 0,000705 |
| ANKRD17  | 0,717851 | 0,000238 |
| CCDC85B  | 0,715672 | 0,000641 |
| PHB      | 0,713663 | 0,000154 |
| ZC3H18   | 0,712665 | 0,000869 |
| TAF15    | 0,712628 | 0,000365 |

|          |          |          |
|----------|----------|----------|
| SRSF9    | 0,71175  | 0,000545 |
| USP3     | 0,708795 | 0,000668 |
| KPNB1    | 0,706643 | 0,0001   |
| PRKCI    | 0,702541 | 0,000794 |
| LLPH     | 0,70053  | 0,00068  |
| COX8A    | 0,699362 | 0,000308 |
| TUBB3    | 0,691647 | 0,000225 |
| TADA3    | 0,689322 | 0,000936 |
| RAD21    | 0,689247 | 0,000144 |
| CASP2    | 0,688629 | 0,000871 |
| SRSF2    | 0,68846  | 0,000482 |
| RPL24    | 0,681562 | 0,000583 |
| STUB1    | 0,676637 | 0,000741 |
| MRPS21   | 0,675957 | 0,00066  |
| ATP9A    | 0,674121 | 0,000984 |
| ALYREF   | 0,671819 | 0,000459 |
| CCT2     | 0,670583 | 0,000688 |
| COX4I1   | 0,662996 | 0,000185 |
| FDPS     | 0,656284 | 0,000633 |
| PSMC1    | 0,648895 | 0,000954 |
| SEC11A   | 0,647627 | 0,000715 |
| DBN1     | 0,640073 | 0,000555 |
| TAF7     | 0,637412 | 0,000989 |
| RPL14    | 0,637393 | 0,000819 |
| SMARCE1  | 0,635747 | 0,00102  |
| HNRNPK   | 0,634571 | 0,000964 |
| HNRNPA2B | 0,631167 | 0,000643 |
| PCBP2    | 0,617454 | 0,000655 |
| EIF2S3   | -0,61485 | 0,000861 |
| CHCHD2   | -0,62629 | 0,000829 |
| EPRS     | -0,62738 | 0,000534 |
| RPS20    | -0,63637 | 0,000261 |
| HUWE1    | -0,63796 | 0,000656 |
| MAPK1    | -0,65251 | 0,000973 |
| AES      | -0,66191 | 0,000646 |
| PPIF     | -0,67387 | 0,000845 |
| YWHAH    | -0,67707 | 0,000267 |
| DDX1     | -0,67779 | 0,00033  |
| AATF     | -0,68195 | 0,000707 |
| MRPS15   | -0,6842  | 0,00052  |
| RAP1B    | -0,68503 | 0,000653 |
| BFAR     | -0,68815 | 0,000776 |
| C11orf58 | -0,69501 | 0,000232 |
| MORF4L2  | -0,6957  | 0,000288 |
| GTF2F1   | -0,70567 | 0,000793 |
| SLTM     | -0,71003 | 0,000439 |
| SGTA     | -0,71186 | 0,000164 |
| EDF1     | -0,71355 | 0,00041  |
| TBCB     | -0,71569 | 0,000668 |
| PTK2     | -0,71847 | 0,000188 |

|         |          |          |
|---------|----------|----------|
| ESYT1   | -0,72109 | 7,55E-05 |
| HDAC1   | -0,72261 | 0,000232 |
| TMEM259 | -0,72388 | 0,000628 |
| DNAJC11 | -0,72565 | 0,000385 |
| COPB1   | -0,72616 | 0,000368 |
| TMEM248 | -0,72971 | 0,000693 |
| SERP1   | -0,73248 | 3,90E-05 |
| PYGB    | -0,73362 | 0,000188 |
| ZDHHC5  | -0,73408 | 0,000333 |
| PKN1    | -0,7398  | 0,000337 |
| MANF    | -0,74221 | 0,000582 |
| AZIN1   | -0,74352 | 4,01E-05 |
| CHMP4B  | -0,74463 | 0,000721 |
| CCT8    | -0,74787 | 4,98E-05 |
| SERF2   | -0,75862 | 0,000169 |
| NUP62   | -0,7598  | 0,000954 |
| ADRM1   | -0,76559 | 8,64E-05 |
| EIF3G   | -0,7665  | 3,90E-05 |
| ROCK2   | -0,76943 | 0,000394 |
| RLIM    | -0,76978 | 0,000286 |
| KHSRP   | -0,77218 | 5,37E-05 |
| CENPO   | -0,77327 | 0,000487 |
| SNX19   | -0,77566 | 0,000535 |
| TACC1   | -0,77582 | 0,000867 |
| NUDCD3  | -0,77887 | 0,000498 |
| ZDHHC7  | -0,77921 | 0,000561 |
| GFM1    | -0,78045 | 0,000119 |
| MTX2    | -0,78265 | 0,000567 |
| MTMR2   | -0,78537 | 0,000878 |
| VIMP    | -0,78692 | 0,000139 |
| CLSPN   | -0,79071 | 0,000296 |
| ARAP1   | -0,79082 | 0,000769 |
| PSMD13  | -0,79232 | 6,85E-05 |
| BAK1    | -0,79894 | 0,000768 |
| ANXA7   | -0,79946 | 3,13E-05 |
| TSTA3   | -0,80014 | 2,60E-05 |
| PISD    | -0,80319 | 0,000401 |
| BRMS1   | -0,80324 | 0,000471 |
| ZNF579  | -0,80327 | 0,000143 |
| METRNL  | -0,8039  | 0,000977 |
| COMMD7  | -0,80857 | 0,000936 |
| AK2     | -0,81133 | 1,32E-05 |
| PPP1R37 | -0,81227 | 0,000735 |
| SLC52A2 | -0,81328 | 0,000211 |
| EIF3I   | -0,81597 | 0,000169 |
| NSMAF   | -0,81705 | 0,000647 |
| UBA52   | -0,82257 | 3,67E-06 |
| OSGIN2  | -0,82422 | 0,00097  |
| ST13    | -0,82465 | 8,89E-05 |
| DCTD    | -0,82597 | 0,000161 |

|          |          |          |
|----------|----------|----------|
| DDX39A   | -0,82719 | 1,79E-05 |
| PLOD3    | -0,82748 | 0,000287 |
| PPP1R9B  | -0,82789 | 1,77E-05 |
| NCKAP1   | -0,82815 | 3,70E-05 |
| BLOC1S3  | -0,82869 | 0,000665 |
| SMC6     | -0,82903 | 0,000934 |
| MED14    | -0,83186 | 0,00018  |
| SERPINH1 | -0,83679 | 0,000139 |
| LTBP3    | -0,83724 | 0,000565 |
| SSSCA1   | -0,83823 | 0,000246 |
| ATXN10   | -0,83849 | 1,86E-05 |
| RBM42    | -0,83936 | 0,000472 |
| DPM1     | -0,84092 | 0,000176 |
| GDI1     | -0,84093 | 2,95E-05 |
| ELOVL5   | -0,84213 | 0,000125 |
| CC2D1B   | -0,84448 | 0,000727 |
| SBNO2    | -0,84485 | 0,000454 |
| RPTOR    | -0,84507 | 3,46E-05 |
| NDOR1    | -0,84709 | 0,000391 |
| EIF3D    | -0,84882 | 0,000124 |
| PPP6R1   | -0,84976 | 0,000104 |
| SHCBP1   | -0,85109 | 0,000756 |
| ELOF1    | -0,85163 | 0,000104 |
| SLC4A1AP | -0,8525  | 0,000775 |
| ARID1B   | -0,85309 | 0,000505 |
| MAP4     | -0,85342 | 1,71E-06 |
| ASCC2    | -0,85378 | 7,69E-05 |
| AKR1A1   | -0,85751 | 0,000107 |
| TMEM70   | -0,86202 | 0,000317 |
| TSSC4    | -0,8636  | 0,000431 |
| CAB39    | -0,865   | 0,000405 |
| FAR1     | -0,86559 | 0,000667 |
| DPP7     | -0,86855 | 8,11E-06 |
| TOR1B    | -0,86933 | 0,000243 |
| SLC26A2  | -0,87008 | 0,000518 |
| SUPT7L   | -0,87433 | 0,000374 |
| ATP2B1   | -0,87459 | 0,000552 |
| C6orf132 | -0,87641 | 0,000215 |
| PIN1     | -0,87726 | 0,000333 |
| FASTKD5  | -0,87822 | 0,000711 |
| APEX2    | -0,87834 | 0,000247 |
| USP4     | -0,8785  | 0,000377 |
| SEPT11   | -0,87978 | 6,76E-06 |
| PFN1     | -0,88142 | 9,75E-07 |
| C11orf24 | -0,88169 | 5,39E-06 |
| DTL      | -0,88229 | 9,11E-05 |
| NDUFAF3  | -0,88435 | 0,000308 |
| MARS     | -0,88437 | 9,94E-07 |
| CWC15    | -0,88445 | 0,000546 |
| ZNF410   | -0,88486 | 1,53E-05 |



|          |          |          |
|----------|----------|----------|
| HMGXB3   | -0,88552 | 7,17E-06 |
| FNDC3A   | -0,88701 | 0,000245 |
| GPAA1    | -0,88837 | 1,29E-05 |
| TMUB1    | -0,88984 | 0,000368 |
| PTP4A1   | -0,89241 | 2,16E-05 |
| EBNA1BP2 | -0,89292 | 3,19E-06 |
| SCRN1    | -0,89414 | 5,90E-06 |
| HEATR1   | -0,89467 | 7,74E-05 |
| PIGT     | -0,89516 | 0,000215 |
| RAB3GAP1 | -0,89614 | 8,17E-06 |
| KIAA0196 | -0,89642 | 9,96E-06 |
| COPRS    | -0,89659 | 0,000374 |
| MAP4K4   | -0,89727 | 2,34E-06 |
| SMG5     | -0,89744 | 3,99E-05 |
| MAGT1    | -0,89983 | 8,76E-05 |
| PSMG3    | -0,90029 | 0,000155 |
| FAM219B  | -0,90257 | 0,000667 |
| PKM      | -0,90347 | 4,98E-05 |
| TTYH3    | -0,90396 | 0,000107 |
| DNM2     | -0,90433 | 5,60E-06 |
| MBOAT7   | -0,90457 | 0,000496 |
| ELMO2    | -0,9047  | 0,000447 |
| XAB2     | -0,90592 | 0,000403 |
| EIF2S2   | -0,90626 | 0,000322 |
| FKBP10   | -0,90828 | 7,76E-07 |
| NOP10    | -0,90971 | 3,30E-05 |
| RNF216   | -0,91097 | 0,000214 |
| TACC2    | -0,91331 | 0,000254 |
| PFN2     | -0,91605 | 1,94E-06 |
| TRAPPC3  | -0,91635 | 0,000275 |
| SHC1     | -0,91701 | 9,38E-07 |
| LAS1L    | -0,91704 | 0,000382 |
| CEP164   | -0,9174  | 9,66E-05 |
| TRIP13   | -0,91893 | 0,000289 |
| SLC9A1   | -0,91937 | 2,65E-05 |
| BICD2    | -0,92113 | 2,13E-05 |
| ORMDL1   | -0,92223 | 0,000129 |
| ZNF358   | -0,92249 | 6,53E-05 |
| FAM21A   | -0,92302 | 6,10E-06 |
| RHOQ     | -0,9238  | 0,000553 |
| POP1     | -0,92539 | 0,00046  |
| RBM3     | -0,92737 | 4,92E-06 |
| RASEF    | -0,9277  | 0,000272 |
| ENTPD6   | -0,92966 | 4,76E-05 |
| USP1     | -0,93152 | 0,000841 |
| FOXP1    | -0,93195 | 0,000298 |
| EP300    | -0,93683 | 0,000204 |
| STRADB   | -0,93719 | 0,000566 |
| OLA1     | -0,93807 | 5,33E-06 |
| AKAP8L   | -0,93953 | 0,000823 |

|           |          |          |
|-----------|----------|----------|
| TSG101    | -0,93962 | 0,000258 |
| ACADM     | -0,94012 | 0,000392 |
| C19orf47  | -0,94205 | 0,000721 |
| PDIA6     | -0,94322 | 0,000373 |
| MBD2      | -0,94391 | 3,56E-05 |
| FLCN      | -0,94399 | 2,69E-05 |
| CDC42     | -0,9449  | 1,86E-05 |
| MRTO4     | -0,94608 | 1,06E-06 |
| TPP2      | -0,94655 | 0,000129 |
| USP47     | -0,94742 | 3,02E-05 |
| GNL1      | -0,9479  | 1,51E-05 |
| SRSF4     | -0,94842 | 0,000113 |
| LRRC47    | -0,95107 | 0,000993 |
| ZC3H3     | -0,95365 | 0,000345 |
| DDHD2     | -0,95481 | 6,07E-05 |
| ARHGEF18  | -0,95704 | 0,000139 |
| NCOA1     | -0,95785 | 0,00057  |
| TULP3     | -0,95889 | 0,000962 |
| TRIM25    | -0,96243 | 0,000116 |
| NOL9      | -0,96294 | 0,000794 |
| PPFIBP1   | -0,96383 | 2,46E-05 |
| KIDINS220 | -0,96398 | 9,83E-07 |
| ACSL1     | -0,96437 | 0,000172 |
| RPS6KA4   | -0,96767 | 1,31E-05 |
| WARS      | -0,96876 | 0,000605 |
| TWSG1     | -0,96951 | 0,000153 |
| PEF1      | -0,96962 | 3,35E-06 |
| RGS10     | -0,97024 | 0,000178 |
| EIF3M     | -0,97073 | 1,14E-06 |
| SPIRE1    | -0,97204 | 1,46E-06 |
| PRKRA     | -0,9722  | 1,86E-06 |
| TMEM184F  | -0,97241 | 1,70E-05 |
| FIBP      | -0,97306 | 1,48E-06 |
| ZHX2      | -0,97473 | 9,46E-05 |
| EIF4ENIF1 | -0,9773  | 0,000125 |
| TMED4     | -0,97743 | 2,38E-06 |
| PBDC1     | -0,97982 | 8,15E-05 |
| PPP2CB    | -0,98126 | 1,69E-05 |
| MPC2      | -0,98149 | 0,000135 |
| SRP14     | -0,98188 | 1,34E-05 |
| MRPS22    | -0,98199 | 1,24E-05 |
| SEC23A    | -0,98495 | 0,000531 |
| RAB27A    | -0,98508 | 0,00055  |
| RAC1      | -0,98571 | 5,85E-08 |
| ATP11B    | -0,98592 | 7,89E-06 |
| ZHX1      | -0,98604 | 5,92E-05 |
| MTRF1L    | -0,98703 | 0,000459 |
| OSBPL9    | -0,98782 | 5,14E-07 |
| BNIP2     | -0,9893  | 0,000228 |
| NFU1      | -0,99087 | 0,00039  |

|           |          |          |
|-----------|----------|----------|
| CYP20A1   | -0,99242 | 0,000463 |
| PXN       | -0,99416 | 0,000703 |
| BLZF1     | -0,99552 | 0,000246 |
| YIF1B     | -0,99694 | 0,000137 |
| YAP1      | -0,99808 | 5,88E-05 |
| JMJD1C    | -0,99877 | 5,88E-05 |
| OPLAH     | -0,99978 | 0,000162 |
| EFCAB14   | -1,00051 | 9,41E-07 |
| ACBD3     | -1,00195 | 1,45E-05 |
| IBTK      | -1,00235 | 5,95E-06 |
| NT5C2     | -1,00357 | 0,000283 |
| HERPUD2   | -1,00566 | 2,85E-05 |
| NAP1L4    | -1,00631 | 4,19E-07 |
| SUN1      | -1,00862 | 6,56E-07 |
| NEDD4     | -1,01027 | 0,000211 |
| CEP63     | -1,01207 | 1,31E-05 |
| POMT2     | -1,01311 | 1,57E-05 |
| HTRA2     | -1,01363 | 0,000119 |
| RBM34     | -1,01392 | 2,40E-06 |
| RAB11B    | -1,01415 | 6,67E-05 |
| LGMN      | -1,01472 | 2,71E-05 |
| SCAF1     | -1,01582 | 4,61E-05 |
| ST7       | -1,01616 | 0,000556 |
| ARHGEF10I | -1,01813 | 0,000317 |
| SUGT1     | -1,01887 | 0,000552 |
| PPIE      | -1,02115 | 1,66E-06 |
| SUV39H1   | -1,02157 | 6,32E-05 |
| WDR4      | -1,02181 | 7,17E-05 |
| COPA      | -1,0221  | 3,16E-06 |
| IAH1      | -1,0223  | 7,50E-06 |
| ENDOD1    | -1,02535 | 0,000107 |
| CREM      | -1,02613 | 6,22E-05 |
| PSMF1     | -1,02653 | 6,08E-05 |
| SKI       | -1,02692 | 4,57E-07 |
| BCCIP     | -1,02726 | 2,94E-07 |
| ATPIF1    | -1,02777 | 5,74E-06 |
| FAM188A   | -1,02818 | 0,000279 |
| HMGN4     | -1,02848 | 2,20E-05 |
| GOLIM4    | -1,02903 | 3,10E-07 |
| LAP3      | -1,02951 | 5,82E-05 |
| IQGAP1    | -1,03004 | 3,60E-06 |
| ASB6      | -1,03052 | 7,25E-05 |
| PSMD14    | -1,03202 | 2,38E-06 |
| GORASP2   | -1,03206 | 1,39E-08 |
| RABAC1    | -1,03433 | 0,000521 |
| UPF3A     | -1,03483 | 5,96E-05 |
| TIMM44    | -1,03916 | 2,26E-06 |
| NFKBIB    | -1,03972 | 0,00064  |
| PHF8      | -1,04017 | 0,000105 |
| MESDC1    | -1,04017 | 0,000142 |

|           |          |          |
|-----------|----------|----------|
| ARHGAP1   | -1,04034 | 0,000606 |
| NSMCE2    | -1,04048 | 1,15E-05 |
| HIAT1     | -1,04137 | 8,90E-06 |
| RNF126    | -1,04164 | 0,000396 |
| MAFK      | -1,04215 | 3,83E-05 |
| IGF2R     | -1,04248 | 0,000139 |
| RUFY3     | -1,04292 | 0,000497 |
| GUCY1A3   | -1,04643 | 0,000421 |
| SSX2IP    | -1,04769 | 2,09E-05 |
| JADE3     | -1,0479  | 0,000103 |
| PHRF1     | -1,0489  | 4,21E-07 |
| CWC22     | -1,04907 | 3,85E-05 |
| SLC35E1   | -1,04926 | 8,11E-07 |
| UTP11L    | -1,05052 | 1,94E-05 |
| GTF2A2    | -1,05083 | 2,33E-06 |
| USP9X     | -1,05536 | 2,66E-05 |
| TPD52     | -1,05617 | 1,30E-06 |
| EIF3J     | -1,05626 | 2,12E-06 |
| GCC2      | -1,05672 | 0,00041  |
| PCNXL2    | -1,05729 | 0,000383 |
| HIVEP1    | -1,06002 | 2,66E-06 |
| CEP104    | -1,06212 | 1,62E-06 |
| DYNLRB1   | -1,06222 | 6,00E-06 |
| LASP1     | -1,06255 | 0,000274 |
| PCGF5     | -1,06294 | 2,65E-05 |
| EIF6      | -1,06363 | 1,03E-07 |
| NUP35     | -1,06694 | 0,000297 |
| ACAP3     | -1,06802 | 1,23E-05 |
| DES12     | -1,06873 | 1,24E-05 |
| HSP90B1   | -1,06982 | 3,53E-07 |
| ATF2      | -1,07113 | 7,93E-05 |
| OTUD5     | -1,07243 | 3,24E-05 |
| PEX3      | -1,07255 | 0,000916 |
| TCEB1     | -1,07389 | 3,36E-07 |
| ABHD12    | -1,07391 | 2,99E-07 |
| RAD51     | -1,07398 | 3,08E-05 |
| LTBR      | -1,0741  | 3,09E-09 |
| GNA11     | -1,07544 | 1,34E-07 |
| MEGF8     | -1,07553 | 1,64E-06 |
| LINC00116 | -1,07738 | 0,000829 |
| SLC35A3   | -1,0788  | 0,000631 |
| KATNAL1   | -1,07901 | 0,00025  |
| VPS37B    | -1,08066 | 8,08E-06 |
| TLN1      | -1,08069 | 7,05E-07 |
| GET4      | -1,08087 | 2,68E-06 |
| SACS      | -1,08228 | 4,83E-07 |
| DOCK7     | -1,08324 | 2,72E-06 |
| KIAA2013  | -1,08522 | 2,36E-06 |
| TPRA1     | -1,08556 | 5,80E-06 |
| YIPF6     | -1,08657 | 5,84E-06 |

|          |          |          |
|----------|----------|----------|
| SDHB     | -1,08705 | 1,10E-06 |
| FAM3C    | -1,08774 | 5,91E-06 |
| GSTO1    | -1,08877 | 0,000148 |
| ITSN1    | -1,08947 | 3,01E-06 |
| TANK     | -1,08991 | 9,53E-06 |
| FER      | -1,09108 | 0,000206 |
| SHB      | -1,09162 | 2,10E-06 |
| CHSY1    | -1,09208 | 6,46E-05 |
| OSBPL2   | -1,09392 | 9,49E-06 |
| DSG2     | -1,0941  | 3,44E-09 |
| SIRT6    | -1,09441 | 5,21E-05 |
| UBA3     | -1,09476 | 0,000113 |
| GNL2     | -1,09477 | 2,63E-07 |
| TFPT     | -1,09525 | 0,00041  |
| ARL2     | -1,09558 | 4,52E-06 |
| TMEM54   | -1,0958  | 3,15E-07 |
| ABRACL   | -1,0959  | 1,88E-05 |
| HPS1     | -1,09731 | 3,94E-06 |
| MAGOHB   | -1,0982  | 0,000128 |
| NCOR2    | -1,09875 | 3,60E-07 |
| TRIO     | -1,09959 | 1,18E-06 |
| TBRG1    | -1,09963 | 1,30E-05 |
| SH3BP4   | -1,10023 | 1,35E-05 |
| DSCC1    | -1,1008  | 0,000124 |
| TXNDC12  | -1,10137 | 4,64E-07 |
| TEAD1    | -1,10197 | 2,64E-07 |
| ARHGAP27 | -1,10336 | 2,98E-05 |
| HPS3     | -1,10337 | 6,06E-06 |
| IL17RA   | -1,10444 | 1,31E-05 |
| MAGOH    | -1,10539 | 2,63E-07 |
| PTPN3    | -1,10637 | 4,30E-06 |
| SMARCAL1 | -1,10737 | 2,41E-05 |
| CLCN7    | -1,10739 | 9,24E-07 |
| PEPD     | -1,10784 | 1,24E-05 |
| SF3B2    | -1,10796 | 3,74E-10 |
| YBX1     | -1,109   | 4,64E-05 |
| C20orf24 | -1,11083 | 3,73E-06 |
| GBE1     | -1,1109  | 0,000375 |
| POLA2    | -1,11215 | 0,000268 |
| ANXA11   | -1,11306 | 1,53E-06 |
| HEXB     | -1,11343 | 9,15E-06 |
| SLC36A1  | -1,11359 | 0,000125 |
| CSPP1    | -1,11544 | 0,000352 |
| RPN1     | -1,11666 | 2,24E-06 |
| MIER1    | -1,11785 | 0,000154 |
| GTPBP1   | -1,11939 | 1,43E-05 |
| SMC4     | -1,11965 | 1,11E-06 |
| NIPA2    | -1,12263 | 2,38E-05 |
| VPS37A   | -1,12313 | 6,76E-06 |
| TBC1D12  | -1,12473 | 0,000272 |

|          |          |          |
|----------|----------|----------|
| BBS7     | -1,12478 | 0,000151 |
| LY6E     | -1,12556 | 0,000719 |
| RHPN2    | -1,12812 | 3,10E-05 |
| DNAJC1   | -1,12936 | 1,01E-08 |
| ZNF343   | -1,12993 | 6,89E-05 |
| CUTA     | -1,13194 | 2,30E-07 |
| DVL1     | -1,13308 | 1,07E-06 |
| HSF1     | -1,13514 | 2,64E-09 |
| CBR1     | -1,13564 | 6,87E-05 |
| ZSWIM8   | -1,13595 | 5,10E-05 |
| MKL1     | -1,13602 | 2,43E-07 |
| RPS6KC1  | -1,13605 | 1,79E-05 |
| RTKN     | -1,13714 | 2,48E-08 |
| PITPNB   | -1,13958 | 2,25E-08 |
| GNB1     | -1,13962 | 1,36E-09 |
| TRMT6    | -1,14055 | 1,19E-07 |
| SEMA4D   | -1,14068 | 0,000896 |
| MACF1    | -1,14071 | 6,11E-09 |
| BABAM1   | -1,14133 | 3,14E-07 |
| MCFD2    | -1,14296 | 2,67E-08 |
| PRKAR2A  | -1,14539 | 0,00064  |
| NUDC     | -1,1455  | 0,00025  |
| SLC39A10 | -1,14586 | 0,000813 |
| MYL6     | -1,14726 | 1,43E-10 |
| CD81     | -1,1499  | 4,35E-08 |
| CEP290   | -1,15109 | 3,34E-05 |
| ADGRG1   | -1,15286 | 5,41E-08 |
| ACTN4    | -1,15286 | 1,43E-05 |
| KDSR     | -1,1556  | 7,00E-08 |
| AKIRIN1  | -1,15566 | 5,13E-08 |
| PLGRKT   | -1,15568 | 0,000166 |
| ZDHHC8   | -1,15719 | 1,90E-05 |
| PGLS     | -1,15872 | 7,21E-07 |
| ZNF414   | -1,15896 | 7,06E-05 |
| KIAA0355 | -1,15927 | 0,00034  |
| SAMD8    | -1,15941 | 0,000156 |
| NFKBIA   | -1,16229 | 1,35E-06 |
| HPS5     | -1,16279 | 1,85E-05 |
| STOM     | -1,16341 | 1,02E-05 |
| PHF1     | -1,16381 | 0,000176 |
| ADAM17   | -1,16447 | 1,05E-05 |
| CHST12   | -1,16533 | 0,000459 |
| ZNF395   | -1,16547 | 7,96E-08 |
| BAG2     | -1,16561 | 1,20E-05 |
| NUCB1    | -1,16604 | 7,54E-07 |
| MAP3K2   | -1,16615 | 5,59E-07 |
| M6PR     | -1,16787 | 1,54E-05 |
| QDPR     | -1,16868 | 3,07E-06 |
| MED15    | -1,17019 | 6,24E-09 |
| ASAP2    | -1,17105 | 1,89E-08 |

|          |          |          |
|----------|----------|----------|
| MIEF1    | -1,17233 | 2,04E-07 |
| POFUT2   | -1,17311 | 0,000715 |
| GLUD1    | -1,17335 | 1,53E-09 |
| KANSL3   | -1,17355 | 8,51E-07 |
| TYRO3    | -1,17434 | 3,34E-08 |
| VAMP4    | -1,17451 | 0,000801 |
| SLC25A28 | -1,17562 | 0,000304 |
| RPS6KA3  | -1,17591 | 6,58E-08 |
| EIF2B2   | -1,177   | 8,30E-09 |
| SLC41A1  | -1,17761 | 2,37E-06 |
| LZTS2    | -1,17768 | 9,41E-09 |
| FMNL2    | -1,17812 | 2,68E-06 |
| MAP2K1   | -1,18025 | 3,84E-08 |
| CHN1     | -1,18026 | 0,000656 |
| EHBP1    | -1,18029 | 1,29E-06 |
| FERMT1   | -1,18274 | 0,000132 |
| USP16    | -1,18345 | 2,44E-06 |
| SAMD4B   | -1,18367 | 2,61E-05 |
| CLIP1    | -1,18375 | 7,33E-09 |
| PPP2R3A  | -1,18457 | 0,000194 |
| RBFOX2   | -1,18489 | 5,27E-09 |
| ZMIZ2    | -1,18619 | 1,55E-10 |
| CFL1     | -1,18649 | 1,82E-09 |
| RASA3    | -1,18653 | 0,000763 |
| SF3B6    | -1,18698 | 1,86E-05 |
| DERL1    | -1,18761 | 2,50E-06 |
| HAT1     | -1,18817 | 3,71E-09 |
| FAU      | -1,19009 | 2,06E-11 |
| SCARB1   | -1,1921  | 3,16E-05 |
| EHD1     | -1,19245 | 0,000829 |
| HK1      | -1,19247 | 6,76E-05 |
| SRPRB    | -1,19349 | 7,97E-10 |
| TMCO3    | -1,19358 | 0,000546 |
| ARF4     | -1,19383 | 0,000811 |
| RECQL    | -1,19547 | 7,48E-08 |
| ITPA     | -1,19558 | 9,49E-06 |
| ZNF584   | -1,19788 | 8,31E-06 |
| RBM19    | -1,19874 | 0,000903 |
| GNAI2    | -1,19902 | 0,000125 |
| SRM      | -1,19914 | 1,96E-05 |
| PSMB2    | -1,1993  | 3,23E-11 |
| LRRFIP2  | -1,19983 | 2,53E-08 |
| DMTN     | -1,2002  | 4,74E-06 |
| IQCB1    | -1,20046 | 2,17E-05 |
| MTDH     | -1,20052 | 5,80E-06 |
| ZCCHC17  | -1,20531 | 8,78E-06 |
| LRRC41   | -1,20542 | 3,82E-08 |
| TFE3     | -1,20555 | 9,33E-09 |
| DLGAP4   | -1,20607 | 3,03E-08 |
| ATP13A2  | -1,20699 | 1,49E-05 |

|          |          |          |
|----------|----------|----------|
| TRIT1    | -1,20719 | 9,82E-05 |
| SEC61A1  | -1,20752 | 0,000177 |
| CTNNAL1  | -1,20879 | 0,00044  |
| ZDHHC13  | -1,20932 | 4,44E-05 |
| KLF4     | -1,21018 | 8,77E-05 |
| RABGEF1  | -1,2111  | 1,58E-07 |
| SVIL     | -1,21149 | 1,73E-05 |
| TWISTNB  | -1,21278 | 2,58E-06 |
| MOSPD1   | -1,21304 | 7,78E-06 |
| SLC2A8   | -1,21333 | 0,000238 |
| UGGT2    | -1,21385 | 0,000992 |
| BTBD10   | -1,2182  | 2,06E-06 |
| NCAPH2   | -1,21841 | 7,23E-09 |
| ARHGEF7  | -1,22052 | 2,69E-06 |
| CSNK2A1  | -1,22162 | 5,45E-10 |
| ENAH     | -1,22244 | 1,26E-07 |
| ACAT1    | -1,22314 | 0,000138 |
| RSU1     | -1,22585 | 6,12E-10 |
| RCBTB1   | -1,22684 | 5,25E-05 |
| DNAJC8   | -1,22704 | 3,15E-07 |
| SBF1     | -1,2274  | 1,31E-08 |
| CEBPD    | -1,22742 | 0,000123 |
| ATP6V1E1 | -1,22862 | 2,67E-06 |
| SLC16A1  | -1,22988 | 1,29E-08 |
| GFRA1    | -1,23008 | 0,000153 |
| MCM8     | -1,23012 | 1,09E-07 |
| C1orf52  | -1,23029 | 1,53E-05 |
| NENF     | -1,23239 | 5,04E-08 |
| ACVR1    | -1,23346 | 0,000161 |
| HAUS8    | -1,23507 | 2,48E-06 |
| CERS5    | -1,23609 | 1,88E-06 |
| UACA     | -1,23639 | 6,38E-06 |
| CCT6A    | -1,23652 | 6,63E-11 |
| NXPH4    | -1,23733 | 2,46E-07 |
| KCTD11   | -1,23744 | 0,000759 |
| MPZL1    | -1,23762 | 3,69E-11 |
| RPS6KA1  | -1,23784 | 0,000234 |
| YIF1A    | -1,23823 | 5,93E-09 |
| ERCC1    | -1,23881 | 3,81E-08 |
| TM2D1    | -1,23969 | 0,00024  |
| ECI2     | -1,24034 | 3,92E-06 |
| LDLRAP1  | -1,24057 | 0,000933 |
| STAT2    | -1,24279 | 2,90E-06 |
| ATAD3A   | -1,24286 | 4,42E-10 |
| DEDD2    | -1,24288 | 0,000169 |
| ATP6V1C1 | -1,24339 | 0,00053  |
| LPGAT1   | -1,24399 | 9,51E-07 |
| SLC10A3  | -1,24435 | 6,41E-08 |
| TMEM230  | -1,24521 | 3,22E-08 |
| ZBTB43   | -1,24619 | 4,31E-07 |



|           |          |          |
|-----------|----------|----------|
| MED27     | -1,24652 | 1,38E-06 |
| RHOG      | -1,24684 | 2,68E-09 |
| LOC100125 | -1,2473  | 7,75E-05 |
| TYK2      | -1,24904 | 6,39E-05 |
| AGTPBP1   | -1,24925 | 1,56E-05 |
| MRPL13    | -1,25207 | 9,32E-08 |
| DMPK      | -1,25224 | 3,57E-05 |
| TMEM87A   | -1,25254 | 1,36E-08 |
| STK24     | -1,25431 | 1,18E-09 |
| TYMS      | -1,25446 | 4,58E-09 |
| CD276     | -1,25467 | 9,04E-06 |
| STAM2     | -1,25519 | 2,99E-07 |
| AGRN      | -1,25552 | 1,26E-06 |
| RAB29     | -1,25829 | 5,66E-05 |
| SPAG9     | -1,2589  | 1,14E-06 |
| BZW1      | -1,25989 | 2,41E-09 |
| PIGK      | -1,26132 | 2,86E-05 |
| LAMB1     | -1,26203 | 2,34E-11 |
| SASS6     | -1,26268 | 0,000786 |
| PTS       | -1,26389 | 0,000542 |
| TMEM63A   | -1,26512 | 0,000133 |
| SELK      | -1,26708 | 0,00074  |
| CRY1      | -1,26847 | 1,38E-06 |
| MAP2K7    | -1,27137 | 6,38E-09 |
| STXBP2    | -1,27154 | 1,25E-08 |
| DPM2      | -1,27172 | 1,40E-05 |
| RB1       | -1,27178 | 3,35E-07 |
| STXBP5    | -1,27189 | 1,03E-05 |
| OPHN1     | -1,2756  | 0,000736 |
| PIK3C3    | -1,27578 | 4,62E-05 |
| MYSM1     | -1,27579 | 0,000976 |
| ELMSAN1   | -1,27642 | 7,17E-05 |
| LUZP1     | -1,27643 | 0,000499 |
| BET1L     | -1,27873 | 8,50E-07 |
| QKI       | -1,27915 | 2,01E-05 |
| EXO5      | -1,27972 | 6,77E-05 |
| RAB3GAP2  | -1,27974 | 4,24E-09 |
| LFNG      | -1,28021 | 9,43E-05 |
| FBXO27    | -1,28086 | 9,11E-08 |
| CD99      | -1,28092 | 5,76E-08 |
| B4GALT5   | -1,28162 | 7,35E-09 |
| DMAP1     | -1,28189 | 0,00036  |
| CDS2      | -1,28417 | 3,27E-07 |
| BLOC1S6   | -1,28448 | 1,47E-08 |
| LMAN2L    | -1,2852  | 4,12E-07 |
| PATL1     | -1,28552 | 1,83E-10 |
| LRRC42    | -1,28665 | 4,89E-09 |
| SATB2     | -1,28677 | 2,28E-06 |
| SLC31A1   | -1,28697 | 8,14E-11 |
| ZFAND2A   | -1,28745 | 3,26E-06 |

|          |          |          |
|----------|----------|----------|
| FOKK1    | -1,28919 | 3,40E-08 |
| GPX8     | -1,28945 | 1,53E-06 |
| CPD      | -1,29042 | 2,74E-09 |
| FLNB     | -1,29055 | 2,17E-06 |
| DHDDS    | -1,29069 | 0,000288 |
| EXOSC10  | -1,29135 | 5,06E-09 |
| SIPA1L2  | -1,29151 | 2,47E-09 |
| CXorf40B | -1,29239 | 0,000468 |
| CLTA     | -1,2926  | 5,92E-10 |
| ARHGAP21 | -1,29268 | 7,01E-09 |
| COPS8    | -1,2928  | 4,70E-07 |
| RCN1     | -1,29337 | 8,02E-12 |
| ZNF335   | -1,29343 | 3,66E-06 |
| ZNF841   | -1,29462 | 7,97E-07 |
| CA5BP1   | -1,29512 | 2,37E-05 |
| CLIC1    | -1,29629 | 1,74E-07 |
| PHC2     | -1,29726 | 8,24E-07 |
| NOTCH2   | -1,29787 | 8,21E-12 |
| TTPAL    | -1,29866 | 1,40E-07 |
| YKT6     | -1,29892 | 2,17E-11 |
| PITHD1   | -1,29899 | 4,47E-08 |
| CDC37    | -1,29909 | 8,36E-07 |
| TMEM201  | -1,30176 | 4,17E-07 |
| SAT2     | -1,30199 | 1,96E-05 |
| EMC1     | -1,30252 | 7,66E-10 |
| VDR      | -1,30307 | 0,000393 |
| SNX12    | -1,30345 | 0,00027  |
| LIMK1    | -1,30404 | 6,33E-06 |
| TRIOBP   | -1,30421 | 4,77E-09 |
| STAT3    | -1,30568 | 0,000471 |
| ACTB     | -1,30668 | 2,44E-06 |
| S100A11  | -1,30885 | 2,67E-05 |
| RNH1     | -1,30956 | 6,26E-06 |
| GFPT1    | -1,30982 | 2,44E-11 |
| TWF2     | -1,30987 | 1,21E-08 |
| MARK4    | -1,31026 | 7,00E-06 |
| RHBDF2   | -1,3105  | 1,09E-08 |
| BMP2K    | -1,31073 | 5,29E-07 |
| PITPNM3  | -1,31207 | 0,000502 |
| MAFG     | -1,31355 | 5,88E-09 |
| MAP7D3   | -1,3136  | 1,13E-09 |
| RRP12    | -1,31567 | 6,76E-11 |
| TPCN1    | -1,31591 | 7,85E-09 |
| SDF4     | -1,31606 | 1,51E-05 |
| HEBP2    | -1,31681 | 3,74E-07 |
| FAM110B  | -1,317   | 0,000928 |
| INTS6    | -1,31885 | 5,29E-05 |
| SEC14L1  | -1,31913 | 9,93E-08 |
| CXXC5    | -1,32074 | 0,000162 |
| ZRSR2    | -1,32121 | 1,85E-07 |

|          |          |          |
|----------|----------|----------|
| EDEM1    | -1,32208 | 1,58E-07 |
| RAPH1    | -1,32444 | 1,02E-05 |
| PNPLA2   | -1,32646 | 9,37E-06 |
| SKAP2    | -1,32661 | 2,93E-07 |
| RPAP1    | -1,32886 | 5,90E-10 |
| ZBTB17   | -1,32942 | 6,57E-07 |
| HAUS2    | -1,32971 | 0,000656 |
| RNF144A  | -1,33016 | 3,57E-05 |
| FBXL6    | -1,33113 | 0,000522 |
| KIF1B    | -1,33123 | 1,88E-05 |
| NCLN     | -1,33255 | 8,34E-12 |
| USP18    | -1,33704 | 0,000731 |
| MELK     | -1,33716 | 2,48E-11 |
| RNF213   | -1,33852 | 0,000215 |
| NDUFA11  | -1,33873 | 1,62E-11 |
| PEX14    | -1,33912 | 1,98E-06 |
| PHF19    | -1,33972 | 2,23E-09 |
| RAB23    | -1,33984 | 2,02E-08 |
| TRAM1    | -1,34018 | 5,00E-05 |
| SCRN3    | -1,34025 | 0,000143 |
| RPF1     | -1,34644 | 4,82E-08 |
| LAMB2    | -1,34656 | 5,92E-09 |
| PTPN9    | -1,34676 | 1,06E-08 |
| HDAC7    | -1,34677 | 1,47E-09 |
| TRIM44   | -1,34741 | 8,84E-13 |
| YPEL5    | -1,34816 | 8,44E-05 |
| U2SURP   | -1,35045 | 3,43E-11 |
| TRIM35   | -1,35313 | 7,15E-06 |
| KIAA1715 | -1,35333 | 2,18E-06 |
| PPARA    | -1,35517 | 0,000377 |
| LRCH1    | -1,35636 | 4,49E-09 |
| ZNF706   | -1,35792 | 1,36E-12 |
| CEP89    | -1,35856 | 1,05E-06 |
| PSMA1    | -1,35951 | 4,52E-12 |
| PWWP2B   | -1,35957 | 6,20E-11 |
| C11orf95 | -1,35959 | 1,05E-08 |
| TJAP1    | -1,35967 | 0,000126 |
| HMGCL    | -1,36034 | 9,04E-07 |
| B4GALT6  | -1,36455 | 0,000905 |
| SDCCAG8  | -1,36481 | 8,96E-05 |
| ILK      | -1,36535 | 1,02E-07 |
| UFM1     | -1,36664 | 2,09E-10 |
| ENC1     | -1,36711 | 1,41E-05 |
| NVL      | -1,36903 | 3,76E-08 |
| WDFY2    | -1,37049 | 7,19E-05 |
| CAPN1    | -1,37119 | 0,000695 |
| CCDC9    | -1,37148 | 2,58E-10 |
| CDK16    | -1,37246 | 6,36E-11 |
| EPS15L1  | -1,373   | 3,92E-08 |
| TRMT1    | -1,3752  | 1,19E-08 |

|          |          |          |
|----------|----------|----------|
| DUSP14   | -1,37542 | 9,27E-09 |
| NSFL1C   | -1,37702 | 3,50E-10 |
| UBE2E3   | -1,38043 | 3,78E-09 |
| TCIRG1   | -1,38134 | 5,60E-06 |
| ZNF823   | -1,38145 | 9,12E-05 |
| WDR91    | -1,38239 | 3,50E-07 |
| SGCB     | -1,38392 | 7,81E-07 |
| STX2     | -1,38455 | 3,18E-06 |
| EPS15    | -1,38482 | 1,58E-09 |
| SSFA2    | -1,38497 | 6,47E-11 |
| POFUT1   | -1,3855  | 2,01E-09 |
| ALKBH3   | -1,38641 | 3,13E-08 |
| YARS     | -1,3871  | 7,76E-08 |
| CCDC50   | -1,38726 | 3,63E-07 |
| CLSTN1   | -1,38821 | 2,65E-08 |
| MAP1S    | -1,38887 | 1,43E-06 |
| CASC4    | -1,38968 | 1,49E-08 |
| STK10    | -1,39058 | 9,02E-11 |
| PTDSS2   | -1,39142 | 0,000435 |
| GNA12    | -1,3916  | 5,92E-11 |
| AAED1    | -1,39187 | 0,000508 |
| TTC13    | -1,39248 | 0,000117 |
| DNAJC3   | -1,3936  | 4,35E-05 |
| ADAM10   | -1,39376 | 4,20E-09 |
| GTF2H1   | -1,39455 | 5,90E-11 |
| CRISPLD2 | -1,39602 | 3,36E-06 |
| MAPK11   | -1,39931 | 4,37E-05 |
| TRIM8    | -1,4005  | 2,04E-09 |
| ZNF114   | -1,40063 | 2,47E-06 |
| CNPY2    | -1,4033  | 9,71E-13 |
| SGK223   | -1,40442 | 3,62E-08 |
| GHDC     | -1,40499 | 0,000288 |
| VAC14    | -1,40514 | 1,45E-13 |
| FBXO28   | -1,40622 | 8,23E-06 |
| SLC12A7  | -1,40658 | 5,74E-11 |
| NRBF2    | -1,4078  | 7,91E-10 |
| PLCG2    | -1,40937 | 3,59E-07 |
| TSPYL2   | -1,41019 | 5,67E-05 |
| LRRC57   | -1,41274 | 0,000387 |
| IFI30    | -1,41443 | 1,82E-05 |
| GNPDA1   | -1,41742 | 8,54E-07 |
| ATF4     | -1,41757 | 9,07E-07 |
| KLHL7    | -1,41763 | 9,27E-06 |
| NECAP2   | -1,41814 | 5,55E-09 |
| DCLK1    | -1,41863 | 6,11E-09 |
| SDC3     | -1,41987 | 1,14E-07 |
| PLD3     | -1,41999 | 3,26E-06 |
| HEBP1    | -1,42058 | 2,05E-10 |
| DYNC1I2  | -1,42458 | 2,70E-10 |
| PNPLA6   | -1,42503 | 0,000208 |

|           |          |          |
|-----------|----------|----------|
| NPC1      | -1,42561 | 4,93E-10 |
| NEK1      | -1,42809 | 0,000873 |
| TNFRSF1A  | -1,42824 | 9,67E-08 |
| LPP       | -1,42831 | 1,36E-08 |
| EXTL3     | -1,42935 | 8,44E-10 |
| LAMP1     | -1,43031 | 6,47E-09 |
| TBC1D20   | -1,43068 | 7,13E-10 |
| MLF1      | -1,4328  | 6,88E-06 |
| SP140L    | -1,43363 | 2,55E-08 |
| PGAM1     | -1,43456 | 3,12E-07 |
| VAMP3     | -1,43484 | 6,36E-05 |
| USP11     | -1,43624 | 2,34E-10 |
| RELA      | -1,43833 | 7,09E-13 |
| NCSTN     | -1,43872 | 7,84E-12 |
| CCDC183-A | -1,43985 | 0,000156 |
| TXLNA     | -1,44072 | 4,17E-09 |
| KCNH2     | -1,44121 | 3,71E-06 |
| SPTAN1    | -1,44126 | 4,24E-12 |
| TMEM65    | -1,44147 | 2,48E-07 |
| XPNPEP1   | -1,44194 | 2,40E-08 |
| RIC8A     | -1,44553 | 1,46E-13 |
| PVRL2     | -1,44761 | 1,82E-09 |
| PACSIN2   | -1,44766 | 1,80E-09 |
| ANKLE2    | -1,44786 | 1,47E-11 |
| KIF3C     | -1,44806 | 2,27E-07 |
| EDEM2     | -1,45361 | 8,69E-09 |
| FKBP9     | -1,45611 | 7,40E-13 |
| TUBA1C    | -1,46016 | 9,82E-14 |
| SLC12A8   | -1,46074 | 1,23E-05 |
| PDCD5     | -1,4612  | 1,09E-14 |
| B3GALNT1  | -1,46238 | 4,51E-08 |
| UAP1      | -1,46276 | 6,37E-07 |
| FIGNL1    | -1,46348 | 6,75E-10 |
| B3GNT4    | -1,46367 | 0,000472 |
| ZBTB8OS   | -1,46486 | 1,84E-07 |
| CTU1      | -1,46753 | 0,000327 |
| WDR13     | -1,46755 | 0,000124 |
| FZD6      | -1,46782 | 3,31E-08 |
| FAXC      | -1,46864 | 5,67E-05 |
| CREB3     | -1,47004 | 1,72E-05 |
| HSPA5     | -1,47073 | 2,98E-17 |
| ARNT2     | -1,47076 | 1,23E-07 |
| ZNF41     | -1,47259 | 5,50E-07 |
| DBNL      | -1,47307 | 2,89E-06 |
| PSMD8     | -1,47405 | 9,30E-17 |
| ERO1A     | -1,47446 | 1,95E-10 |
| LAPTM4A   | -1,47465 | 9,10E-14 |
| SLC25A32  | -1,4749  | 1,88E-07 |
| CALU      | -1,475   | 1,45E-11 |
| TOM1      | -1,47536 | 1,29E-07 |

|          |          |          |
|----------|----------|----------|
| ZNF275   | -1,47563 | 2,69E-09 |
| BTN2A2   | -1,47568 | 1,47E-05 |
| CLK1     | -1,47653 | 0,000133 |
| CDC42BPA | -1,47768 | 1,86E-07 |
| ZNF44    | -1,47937 | 6,84E-06 |
| CCZ1     | -1,4818  | 6,46E-09 |
| FBXO42   | -1,48342 | 8,48E-07 |
| EMC7     | -1,4853  | 4,17E-08 |
| HDAC6    | -1,48536 | 6,00E-09 |
| ATP1B3   | -1,48633 | 1,29E-16 |
| PDIA5    | -1,48638 | 3,75E-10 |
| GLRX3    | -1,48768 | 2,80E-13 |
| ANO6     | -1,48794 | 5,92E-09 |
| INAFM1   | -1,48987 | 5,59E-06 |
| FTL      | -1,49055 | 6,72E-05 |
| CNDP2    | -1,49076 | 2,89E-10 |
| B3GLCT   | -1,49181 | 6,18E-05 |
| PLXNA3   | -1,49261 | 1,18E-08 |
| NFATC1   | -1,49308 | 0,000219 |
| USP40    | -1,49337 | 3,16E-09 |
| RASAL2   | -1,49351 | 6,08E-09 |
| MAST2    | -1,49679 | 9,66E-13 |
| PIGH     | -1,49844 | 3,44E-09 |
| PRPS1    | -1,49911 | 8,76E-09 |
| FMNL3    | -1,50049 | 4,12E-08 |
| CST3     | -1,50079 | 2,39E-09 |
| PNKD     | -1,50128 | 5,48E-08 |
| SERAC1   | -1,50153 | 0,00058  |
| LGR4     | -1,5026  | 0,000108 |
| STAM     | -1,50522 | 5,98E-08 |
| NRSN2    | -1,50665 | 3,57E-06 |
| CREB3L2  | -1,50674 | 9,33E-08 |
| RAB7A    | -1,50967 | 3,49E-06 |
| TRNAU1AP | -1,51032 | 2,67E-06 |
| PRKAG2   | -1,51094 | 1,16E-11 |
| ATP6AP2  | -1,51103 | 5,58E-09 |
| PPP1R12C | -1,51173 | 6,84E-11 |
| CAPZB    | -1,51271 | 8,82E-08 |
| EOGT     | -1,51336 | 0,000319 |
| CCDC130  | -1,51597 | 0,00012  |
| DNTTIP2  | -1,51606 | 1,01E-14 |
| ENO1     | -1,51706 | 2,05E-08 |
| DPF2     | -1,52109 | 2,26E-12 |
| SMAP2    | -1,52351 | 0,000543 |
| POMGNT1  | -1,52589 | 0,000191 |
| KIAA1671 | -1,52718 | 7,10E-11 |
| ITPR3    | -1,52789 | 1,48E-10 |
| RNPEPL1  | -1,5303  | 4,35E-08 |
| RTN4     | -1,53075 | 4,59E-13 |
| RNF24    | -1,53382 | 8,21E-06 |

|          |          |          |
|----------|----------|----------|
| SNX3     | -1,53435 | 5,00E-10 |
| FAM210A  | -1,53521 | 2,83E-06 |
| CCDC91   | -1,53727 | 4,86E-06 |
| ATP6V0B  | -1,53864 | 3,50E-16 |
| COL9A2   | -1,54052 | 6,33E-05 |
| GNB1L    | -1,54105 | 4,72E-06 |
| ST3GAL4  | -1,54124 | 5,75E-05 |
| RILPL1   | -1,5421  | 1,03E-07 |
| HSPBAP1  | -1,54376 | 0,000116 |
| NUAK1    | -1,54571 | 8,06E-10 |
| RIT1     | -1,5462  | 8,64E-10 |
| ACOT9    | -1,54627 | 9,08E-08 |
| TRPV3    | -1,54665 | 0,000129 |
| ARFGEF1  | -1,54694 | 4,08E-12 |
| TBC1D17  | -1,54848 | 2,86E-06 |
| TXN      | -1,54978 | 4,75E-07 |
| BNIP3L   | -1,55369 | 0,000146 |
| CD151    | -1,55485 | 1,63E-13 |
| TDRD7    | -1,55515 | 0,000907 |
| PRELID2  | -1,55756 | 9,79E-07 |
| SLC35C1  | -1,55932 | 3,04E-13 |
| SH3RF1   | -1,56015 | 0,000129 |
| EXT2     | -1,56032 | 1,45E-07 |
| EIF1AD   | -1,56041 | 2,64E-14 |
| TMED5    | -1,56057 | 8,27E-08 |
| PTP4A2   | -1,56112 | 5,56E-14 |
| SNX25    | -1,56156 | 1,55E-05 |
| SOD2     | -1,5622  | 9,78E-12 |
| PLD1     | -1,56222 | 2,88E-06 |
| WHAMM    | -1,56247 | 9,77E-09 |
| ARMC9    | -1,56479 | 4,73E-09 |
| RMDN3    | -1,5648  | 1,01E-06 |
| DR1      | -1,56578 | 1,96E-14 |
| DNTTIP1  | -1,56988 | 3,31E-10 |
| ARL2BP   | -1,57031 | 4,98E-12 |
| FAM49B   | -1,57072 | 1,72E-16 |
| TRIM14   | -1,57164 | 0,000239 |
| SEPT7    | -1,57332 | 1,77E-13 |
| GNPTG    | -1,57603 | 1,78E-09 |
| DCBLD1   | -1,57609 | 0,000172 |
| SLC2A10  | -1,57642 | 4,22E-05 |
| WDFY1    | -1,57646 | 4,52E-13 |
| ARHGEF10 | -1,57653 | 0,000125 |
| PIP5K1C  | -1,57943 | 3,15E-07 |
| SPRYD7   | -1,58049 | 1,18E-06 |
| PLEKHG2  | -1,5813  | 2,65E-12 |
| PLEKHA5  | -1,58335 | 3,21E-10 |
| ACADVL   | -1,58615 | 3,84E-08 |
| UBQLN2   | -1,5866  | 3,28E-14 |
| AP2A2    | -1,58679 | 1,54E-12 |

|           |          |          |
|-----------|----------|----------|
| TPD52L2   | -1,58919 | 1,92E-15 |
| TAF2      | -1,59016 | 2,14E-16 |
| PARP3     | -1,59027 | 4,71E-07 |
| BCL2L2    | -1,59082 | 2,41E-08 |
| ATP11A    | -1,59119 | 5,48E-09 |
| SEMA7A    | -1,592   | 1,48E-07 |
| ITSN2     | -1,59268 | 3,94E-09 |
| ZNF274    | -1,59319 | 1,33E-08 |
| STK40     | -1,59382 | 9,84E-09 |
| MAD1L1    | -1,59445 | 1,03E-17 |
| DNAJC10   | -1,59604 | 9,53E-13 |
| ITGAV     | -1,5961  | 1,30E-09 |
| UBA5      | -1,59635 | 2,79E-09 |
| CABLES1   | -1,59699 | 1,51E-07 |
| DMWD      | -1,59701 | 1,76E-10 |
| ZNF530    | -1,59725 | 0,00071  |
| JMJD6     | -1,59756 | 2,91E-06 |
| PARP8     | -1,5977  | 1,18E-06 |
| RNF19A    | -1,59882 | 3,32E-09 |
| NEK6      | -1,59949 | 6,43E-12 |
| FLVCR1    | -1,6     | 8,35E-06 |
| CTSC      | -1,60513 | 3,13E-13 |
| CNIH4     | -1,60622 | 2,25E-12 |
| ABL2      | -1,60726 | 2,92E-16 |
| WWC2      | -1,60843 | 2,19E-10 |
| FBXL12    | -1,60879 | 2,18E-06 |
| CARS      | -1,60973 | 6,37E-09 |
| RDH10     | -1,61137 | 5,52E-05 |
| BACH1     | -1,61149 | 3,17E-05 |
| PLEKHM1   | -1,61211 | 3,41E-06 |
| ATP6V1D   | -1,61655 | 7,58E-05 |
| AP1M1     | -1,61696 | 5,93E-08 |
| RNF216P1  | -1,62124 | 5,58E-09 |
| TMEM198   | -1,62162 | 0,000126 |
| GARS      | -1,62213 | 3,77E-17 |
| PHF20L1   | -1,6239  | 1,78E-17 |
| GUK1      | -1,62612 | 1,32E-08 |
| CCNL1     | -1,62678 | 0,000327 |
| DIXDC1    | -1,62825 | 2,78E-06 |
| NCS1      | -1,62959 | 5,67E-16 |
| ATP10D    | -1,62996 | 0,000614 |
| ANXA2     | -1,6311  | 1,51E-21 |
| NR6A1     | -1,6314  | 3,62E-05 |
| CKAP2L    | -1,63141 | 9,66E-06 |
| QRICH2    | -1,63554 | 0,000118 |
| IER3      | -1,63589 | 2,19E-11 |
| LOC646762 | -1,63651 | 6,00E-05 |
| GPR108    | -1,63779 | 1,22E-09 |
| PFDN2     | -1,63839 | 1,14E-12 |
| FZD7      | -1,63951 | 6,47E-09 |



|           |          |          |
|-----------|----------|----------|
| CHCHD7    | -1,64108 | 2,19E-06 |
| LINC01278 | -1,64132 | 1,12E-10 |
| PLEKHN1   | -1,64385 | 5,27E-06 |
| C19orf12  | -1,64457 | 7,40E-09 |
| ZNF440    | -1,64483 | 3,08E-05 |
| CYP2R1    | -1,64492 | 0,000374 |
| TESK1     | -1,64663 | 1,45E-10 |
| SNTB1     | -1,64725 | 5,16E-18 |
| CALR      | -1,6478  | 5,24E-07 |
| ATP6V1H   | -1,65031 | 2,52E-11 |
| DOCK5     | -1,65045 | 1,03E-08 |
| RASSF3    | -1,65046 | 1,83E-08 |
| FZD5      | -1,65237 | 2,75E-11 |
| ZC3H12A   | -1,65244 | 1,54E-05 |
| MYDGF     | -1,65289 | 2,57E-11 |
| FGF11     | -1,65361 | 0,000287 |
| CAST      | -1,65442 | 1,83E-14 |
| PQLC1     | -1,65462 | 4,80E-09 |
| TBCE      | -1,65603 | 4,62E-11 |
| COL18A1   | -1,65668 | 2,35E-17 |
| REXO2     | -1,65728 | 1,09E-06 |
| ATP9B     | -1,65741 | 1,91E-06 |
| SIPA1L3   | -1,65749 | 5,64E-16 |
| WDR47     | -1,65762 | 2,74E-07 |
| RER1      | -1,65773 | 1,25E-16 |
| JAK3      | -1,65853 | 0,000109 |
| CNKSR3    | -1,65938 | 2,16E-08 |
| ADCY3     | -1,66074 | 1,69E-14 |
| JRKL      | -1,66138 | 3,50E-05 |
| RASA2     | -1,66404 | 1,86E-05 |
| CFLAR     | -1,66547 | 1,39E-13 |
| MAP2      | -1,66593 | 3,91E-05 |
| SHARPIN   | -1,6676  | 8,56E-19 |
| SETD4     | -1,6683  | 0,000589 |
| ANXA5     | -1,66855 | 1,19E-22 |
| AKIP1     | -1,67022 | 2,44E-09 |
| BCL10     | -1,67106 | 1,16E-07 |
| PQBP1     | -1,67194 | 1,99E-13 |
| BTG1      | -1,67213 | 2,14E-17 |
| ALS2      | -1,67369 | 3,33E-12 |
| CELSR1    | -1,67407 | 6,64E-17 |
| MORC4     | -1,67452 | 4,38E-13 |
| INAFM2    | -1,67532 | 0,000686 |
| MARVELD1  | -1,67638 | 6,19E-13 |
| ARFGAP1   | -1,67644 | 6,80E-16 |
| ECHDC3    | -1,67655 | 3,85E-07 |
| AGPAT2    | -1,67804 | 1,11E-13 |
| ELK1      | -1,67886 | 1,25E-14 |
| LOC100133 | -1,67939 | 0,000858 |
| NIPA1     | -1,68107 | 6,08E-14 |

|           |          |          |
|-----------|----------|----------|
| JOSD1     | -1,68133 | 1,07E-16 |
| KLC2      | -1,68159 | 1,09E-17 |
| TCF19     | -1,68183 | 1,54E-16 |
| HGSNAT    | -1,68444 | 3,77E-06 |
| HSPA13    | -1,68518 | 7,93E-08 |
| PLEKHA1   | -1,68803 | 2,39E-09 |
| KLF3      | -1,68904 | 5,89E-09 |
| SETDB2    | -1,6901  | 5,14E-06 |
| NOCT      | -1,69141 | 1,49E-09 |
| DONSON    | -1,69409 | 2,29E-10 |
| NCK2      | -1,69494 | 3,60E-20 |
| RGS19     | -1,69888 | 1,15E-06 |
| MPRIP     | -1,69954 | 2,99E-13 |
| CTNS      | -1,70036 | 1,02E-12 |
| ZNHIT6    | -1,7004  | 4,21E-05 |
| PPP3CC    | -1,70111 | 1,88E-06 |
| RIPK2     | -1,70276 | 3,77E-20 |
| C1GALT1   | -1,70284 | 2,15E-08 |
| FAM129B   | -1,70475 | 5,00E-14 |
| CXorf38   | -1,70477 | 2,29E-08 |
| LATS2     | -1,7048  | 2,65E-12 |
| RUNX1     | -1,70678 | 5,65E-17 |
| LRRFIP1   | -1,70701 | 1,70E-19 |
| ACOT7     | -1,70714 | 6,06E-11 |
| SLC35A2   | -1,70755 | 1,98E-11 |
| SLC20A1   | -1,71007 | 4,41E-20 |
| PTPN21    | -1,7101  | 3,41E-09 |
| CASP3     | -1,7108  | 2,12E-07 |
| DPP9      | -1,71366 | 1,35E-13 |
| PLCB4     | -1,71373 | 3,02E-09 |
| SPG20     | -1,71466 | 4,14E-14 |
| PTPRG     | -1,71477 | 6,96E-10 |
| SLFN5     | -1,71586 | 4,27E-08 |
| PARVB     | -1,71785 | 5,92E-11 |
| ARRDC3    | -1,71881 | 9,26E-09 |
| MAGED2    | -1,71888 | 4,48E-17 |
| SZT2      | -1,7192  | 1,29E-08 |
| UXT       | -1,71925 | 7,52E-09 |
| FNTA      | -1,72161 | 6,13E-14 |
| TSPO      | -1,72301 | 4,55E-18 |
| PGK1      | -1,72591 | 8,97E-18 |
| WASF2     | -1,72641 | 6,53E-19 |
| MTFR2     | -1,7277  | 0,000497 |
| SNAPC2    | -1,72813 | 1,90E-08 |
| GPKOW     | -1,72843 | 1,00E-10 |
| FAM65A    | -1,72846 | 3,18E-16 |
| TMEM178f  | -1,72871 | 9,33E-09 |
| DYNLT1    | -1,72958 | 3,89E-15 |
| ST6GALNAc | -1,73059 | 2,20E-08 |
| HIVEP2    | -1,73146 | 4,60E-14 |

|          |          |          |
|----------|----------|----------|
| HIC1     | -1,73181 | 0,00064  |
| PPIL3    | -1,73194 | 3,17E-12 |
| WDR45    | -1,73518 | 1,20E-09 |
| SLC25A12 | -1,73615 | 1,58E-08 |
| HIPK2    | -1,73925 | 1,96E-06 |
| ABCC4    | -1,74016 | 8,97E-14 |
| FUCA1    | -1,7418  | 7,34E-08 |
| TOLLIP   | -1,74287 | 2,03E-06 |
| SYNJ1    | -1,74442 | 4,68E-06 |
| ZNFX1    | -1,74458 | 7,89E-09 |
| ST3GAL3  | -1,745   | 4,70E-05 |
| SSR3     | -1,74569 | 5,80E-15 |
| OGFR     | -1,74574 | 6,59E-13 |
| C19orf33 | -1,74623 | 1,08E-07 |
| PI4K2A   | -1,74914 | 1,21E-10 |
| EPS8L2   | -1,75173 | 1,57E-07 |
| NFKB1    | -1,75235 | 5,22E-08 |
| NAPRT    | -1,75346 | 2,45E-05 |
| FBXO17   | -1,75467 | 7,32E-07 |
| LPCAT4   | -1,75649 | 1,11E-05 |
| MBOAT2   | -1,76141 | 6,68E-10 |
| CSRP2    | -1,7618  | 1,70E-11 |
| FAIM     | -1,76428 | 1,45E-09 |
| TIPARP   | -1,76436 | 2,16E-10 |
| EGLN1    | -1,76457 | 1,01E-16 |
| RHOC     | -1,76473 | 9,39E-10 |
| PDGFB    | -1,76554 | 2,13E-08 |
| MGAT5    | -1,76665 | 3,52E-13 |
| EML2     | -1,76831 | 3,83E-08 |
| SRGAP2D  | -1,76899 | 0,000671 |
| HCFC2    | -1,76916 | 0,00013  |
| SGMS2    | -1,76991 | 0,00027  |
| LENG8    | -1,7725  | 3,28E-11 |
| CD63     | -1,77527 | 7,91E-10 |
| UBE2J2   | -1,77563 | 4,46E-19 |
| CASP7    | -1,7795  | 2,61E-08 |
| PCBP4    | -1,77958 | 1,98E-12 |
| TIGD7    | -1,7798  | 0,000134 |
| ZNF563   | -1,78003 | 0,000149 |
| CASP8    | -1,78033 | 1,53E-13 |
| FAM198B  | -1,78115 | 9,44E-12 |
| WDR90    | -1,78208 | 0,000261 |
| TOMM34   | -1,78225 | 7,27E-19 |
| EVI5     | -1,7829  | 6,12E-07 |
| CPTP     | -1,78392 | 2,85E-12 |
| PLEKHA3  | -1,78494 | 3,69E-10 |
| AP5Z1    | -1,7854  | 1,26E-17 |
| NOD1     | -1,78695 | 1,88E-07 |
| TPP1     | -1,78809 | 4,24E-12 |
| RNF185   | -1,79014 | 4,66E-15 |

|           |          |          |
|-----------|----------|----------|
| PDLIM5    | -1,79061 | 3,01E-09 |
| AHNAK     | -1,79125 | 3,03E-12 |
| FADS3     | -1,79158 | 4,90E-13 |
| PLEKHM2   | -1,79202 | 4,44E-17 |
| FAAP20    | -1,7923  | 5,59E-15 |
| SNTA1     | -1,79302 | 4,23E-10 |
| NAPA      | -1,7931  | 3,92E-08 |
| PCED1A    | -1,79592 | 1,44E-10 |
| VPS13C    | -1,79725 | 1,94E-08 |
| ZNF644    | -1,79795 | 2,33E-17 |
| RBMS1     | -1,79826 | 2,50E-11 |
| EPHX1     | -1,79969 | 3,66E-08 |
| SEMA6A    | -1,79986 | 1,40E-08 |
| TMEM62    | -1,80214 | 4,48E-11 |
| CFL2      | -1,80732 | 2,08E-12 |
| ABHD5     | -1,80748 | 8,93E-15 |
| RALB      | -1,80917 | 0,00016  |
| ETV6      | -1,80951 | 2,40E-11 |
| BACE2     | -1,81084 | 6,21E-12 |
| MYO10     | -1,81105 | 5,99E-17 |
| UBA6      | -1,81231 | 4,14E-18 |
| CHST14    | -1,81273 | 3,57E-08 |
| FJX1      | -1,81344 | 0,000284 |
| RDX       | -1,81362 | 1,30E-12 |
| ITGB1BP1  | -1,81423 | 6,07E-14 |
| STK4      | -1,81477 | 2,71E-16 |
| SLC17A5   | -1,81747 | 1,88E-05 |
| SMS       | -1,81943 | 5,44E-13 |
| SERTAD2   | -1,8199  | 3,29E-17 |
| KDELC1    | -1,82237 | 3,22E-07 |
| MXD1      | -1,82276 | 1,45E-07 |
| FURIN     | -1,82549 | 2,43E-13 |
| KCNC4     | -1,82555 | 9,81E-05 |
| CDC42EP5  | -1,82796 | 9,15E-05 |
| PTER      | -1,82803 | 5,76E-13 |
| ZFP36L1   | -1,82966 | 4,36E-13 |
| PACS1     | -1,83025 | 2,72E-17 |
| GIN5      | -1,83184 | 1,85E-07 |
| RELL2     | -1,83319 | 2,90E-08 |
| RAPGEF1   | -1,83419 | 5,61E-14 |
| ARPIN     | -1,83463 | 4,27E-05 |
| F2R       | -1,83678 | 4,13E-07 |
| FAM76A    | -1,83679 | 2,25E-05 |
| DIAPH2    | -1,83705 | 1,58E-07 |
| AKAP17A   | -1,83856 | 1,19E-08 |
| UXS1      | -1,83893 | 5,02E-21 |
| FRMD8     | -1,84284 | 4,36E-13 |
| MIR4435-2 | -1,8429  | 1,80E-09 |
| ITPRIPL2  | -1,84461 | 6,03E-15 |
| LRIG1     | -1,84567 | 4,57E-12 |

|          |          |          |
|----------|----------|----------|
| C4orf32  | -1,84659 | 4,53E-06 |
| GNPDA2   | -1,84909 | 0,000165 |
| ZFPL1    | -1,85215 | 6,10E-18 |
| LPIN2    | -1,8525  | 1,60E-11 |
| PJA1     | -1,85391 | 1,95E-09 |
| MT2A     | -1,85427 | 4,61E-17 |
| NABP1    | -1,85435 | 7,36E-09 |
| AMPD2    | -1,85442 | 2,37E-12 |
| TTLL11   | -1,8551  | 0,000127 |
| MYO9B    | -1,85745 | 3,66E-10 |
| TK2      | -1,85912 | 7,06E-06 |
| ATRNL1   | -1,86258 | 0,000136 |
| VOPP1    | -1,86417 | 2,80E-12 |
| KDM5C    | -1,86476 | 2,47E-21 |
| KDEL3    | -1,86645 | 2,39E-05 |
| KLF10    | -1,86728 | 8,23E-07 |
| SDC1     | -1,86927 | 8,32E-16 |
| ADAM9    | -1,87035 | 1,54E-21 |
| UBA6-AS1 | -1,8706  | 2,04E-07 |
| ANKRD13C | -1,87261 | 1,81E-12 |
| CAPN10   | -1,87335 | 1,08E-06 |
| DGKD     | -1,87388 | 6,83E-12 |
| RLTPR    | -1,87482 | 1,86E-06 |
| CD58     | -1,87563 | 3,66E-08 |
| FKBP1A   | -1,876   | 8,33E-16 |
| OXCT1    | -1,87621 | 4,49E-15 |
| DES1     | -1,87639 | 6,75E-22 |
| IL13RA1  | -1,87677 | 1,83E-11 |
| EIF5A2   | -1,87807 | 1,32E-13 |
| ZNF827   | -1,88352 | 2,21E-05 |
| SPRED2   | -1,88552 | 1,05E-19 |
| SLC33A1  | -1,88603 | 1,05E-15 |
| DOK3     | -1,88689 | 2,76E-06 |
| PRAF2    | -1,89002 | 2,06E-07 |
| RNF149   | -1,89314 | 1,72E-22 |
| DAPK3    | -1,89437 | 1,48E-20 |
| SIN3B    | -1,89618 | 1,29E-19 |
| TNIP1    | -1,89797 | 4,67E-08 |
| SLC35F6  | -1,89902 | 1,53E-14 |
| APH1B    | -1,90003 | 8,21E-06 |
| SLC8A1   | -1,90484 | 4,24E-12 |
| RP9P     | -1,90533 | 1,43E-05 |
| SNX9     | -1,90686 | 8,54E-18 |
| OAT      | -1,90811 | 5,25E-06 |
| SLC31A2  | -1,90955 | 0,000617 |
| MROH1    | -1,91145 | 9,95E-16 |
| SNX21    | -1,91221 | 1,57E-10 |
| AIDA     | -1,91278 | 1,20E-10 |
| IFI27L1  | -1,91349 | 1,22E-06 |
| BTG3     | -1,91477 | 5,45E-05 |

|          |          |          |
|----------|----------|----------|
| HECTD3   | -1,91586 | 2,60E-09 |
| SLC15A4  | -1,91751 | 2,23E-15 |
| ZNF558   | -1,91764 | 2,27E-08 |
| TAPBP    | -1,91969 | 9,57E-09 |
| LGALS8   | -1,92327 | 2,33E-14 |
| AAK1     | -1,92646 | 1,72E-10 |
| NFIX     | -1,92728 | 3,70E-08 |
| CNTLN    | -1,92801 | 1,84E-05 |
| TCEA1    | -1,9306  | 5,80E-15 |
| CHIC1    | -1,93317 | 0,00077  |
| FAM107B  | -1,93339 | 2,09E-06 |
| GPR161   | -1,93359 | 7,09E-11 |
| PDIA3    | -1,93439 | 3,83E-24 |
| NBEA     | -1,93757 | 3,25E-08 |
| USB1     | -1,93812 | 2,13E-08 |
| RAB8B    | -1,93899 | 8,59E-07 |
| PHF11    | -1,93919 | 1,25E-09 |
| CD82     | -1,93939 | 4,25E-10 |
| FLOT1    | -1,93995 | 3,76E-18 |
| SEC61A2  | -1,94168 | 1,62E-07 |
| LIN37    | -1,94326 | 6,84E-09 |
| CMIP     | -1,94447 | 5,55E-16 |
| GLI3     | -1,94459 | 2,30E-10 |
| IMPA1    | -1,94842 | 4,84E-09 |
| CORO1C   | -1,95116 | 1,88E-26 |
| SEL1L3   | -1,9517  | 6,73E-13 |
| CPOX     | -1,95364 | 7,84E-07 |
| DOCK9    | -1,95501 | 5,26E-15 |
| FARP1    | -1,9551  | 4,67E-18 |
| MGST3    | -1,95644 | 2,72E-10 |
| SH3GL1   | -1,95887 | 2,17E-17 |
| TEX30    | -1,95922 | 2,64E-09 |
| MFSD12   | -1,96027 | 1,12E-23 |
| PLBD2    | -1,96062 | 6,72E-10 |
| ELF4     | -1,96312 | 1,00E-10 |
| FTSJ1    | -1,96389 | 1,35E-22 |
| ANXA2P2  | -1,96402 | 0,000139 |
| NPC2     | -1,96539 | 3,07E-19 |
| PKD1     | -1,96617 | 0,000117 |
| SHISA2   | -1,96675 | 2,60E-05 |
| C1orf198 | -1,96726 | 1,18E-12 |
| CTSA     | -1,97017 | 1,35E-07 |
| ECHDC1   | -1,97204 | 4,30E-11 |
| HIC2     | -1,9729  | 6,37E-07 |
| CBR3     | -1,97388 | 1,43E-05 |
| PTPRJ    | -1,97421 | 3,68E-14 |
| ITM2B    | -1,97478 | 7,32E-18 |
| DRAM1    | -1,97534 | 4,96E-11 |
| C12orf4  | -1,97573 | 2,07E-13 |
| CYTH3    | -1,97653 | 1,02E-15 |

|          |          |          |
|----------|----------|----------|
| RCAN3    | -1,97749 | 9,16E-06 |
| C15orf41 | -1,97916 | 2,30E-05 |
| PRKXP1   | -1,97963 | 0,000183 |
| CDC42EP2 | -1,98022 | 3,11E-13 |
| LEPROT   | -1,98334 | 3,37E-15 |
| GCLM     | -1,98645 | 2,31E-07 |
| P4HA1    | -1,98656 | 1,18E-21 |
| HOXB7    | -1,99075 | 2,18E-10 |
| XRRA1    | -1,99176 | 1,14E-10 |
| PRKACB   | -1,99374 | 1,04E-13 |
| GADD45B  | -1,99403 | 0,000991 |
| KCNJ14   | -1,99697 | 2,52E-05 |
| VAT1     | -1,99821 | 1,51E-10 |
| EFNB1    | -2,00207 | 7,37E-12 |
| SLC39A8  | -2,00432 | 1,18E-09 |
| EIF2AK4  | -2,00433 | 1,89E-22 |
| GRAMD1A  | -2,00711 | 1,18E-26 |
| HCCS     | -2,00891 | 3,55E-14 |
| ME2      | -2,00978 | 1,14E-20 |
| CHFR     | -2,01176 | 2,04E-17 |
| IFNAR2   | -2,01204 | 4,66E-12 |
| USE1     | -2,01417 | 4,05E-15 |
| PAK1     | -2,01611 | 1,01E-08 |
| KIF13B   | -2,01622 | 0,000208 |
| NUMBL    | -2,01772 | 2,32E-19 |
| BIRC2    | -2,0197  | 6,86E-11 |
| GALE     | -2,02584 | 2,79E-09 |
| CAMK1    | -2,026   | 2,16E-06 |
| SNAPC1   | -2,02644 | 2,74E-11 |
| SYVN1    | -2,02815 | 4,14E-16 |
| ZNF486   | -2,0285  | 1,66E-07 |
| MITD1    | -2,02874 | 2,11E-17 |
| GOLGA7B  | -2,03181 | 0,00011  |
| PCDHGB7  | -2,03201 | 0,000221 |
| RIOK3    | -2,03215 | 1,04E-20 |
| SLC39A13 | -2,03244 | 2,17E-16 |
| PDGFA    | -2,03383 | 2,24E-16 |
| SEC61G   | -2,0345  | 1,76E-08 |
| TPK1     | -2,03565 | 6,54E-06 |
| IQCG     | -2,03605 | 2,00E-07 |
| OSTM1    | -2,03668 | 0,000202 |
| KLF13    | -2,03732 | 4,87E-23 |
| SORBS1   | -2,03979 | 7,58E-07 |
| SLC23A2  | -2,04121 | 1,84E-19 |
| PBX3     | -2,04195 | 1,27E-13 |
| TRIB3    | -2,04319 | 7,92E-05 |
| SOCS6    | -2,04324 | 1,70E-14 |
| ADPRHL2  | -2,04332 | 2,74E-22 |
| GATA6    | -2,04367 | 2,50E-07 |
| RBMS2    | -2,0451  | 2,32E-07 |

|           |          |          |
|-----------|----------|----------|
| SLC1A4    | -2,04931 | 2,53E-06 |
| TTC28     | -2,05017 | 1,74E-11 |
| LOC90768  | -2,05136 | 3,05E-06 |
| ASPHD1    | -2,05192 | 6,04E-08 |
| CLDN23    | -2,05309 | 1,22E-07 |
| TICAM1    | -2,05319 | 1,57E-21 |
| RALA      | -2,05362 | 4,53E-28 |
| SCN8A     | -2,05412 | 0,000154 |
| CASK      | -2,05495 | 6,67E-23 |
| SCYL1     | -2,05591 | 1,92E-20 |
| TMEM106/  | -2,05627 | 0,000149 |
| TRIM21    | -2,05627 | 0,000503 |
| QSOX1     | -2,06057 | 2,53E-24 |
| CDK2AP2   | -2,0607  | 1,41E-26 |
| TBKBP1    | -2,0661  | 7,25E-06 |
| TCF12     | -2,06663 | 4,20E-13 |
| MID2      | -2,06767 | 3,93E-12 |
| ITGB1     | -2,0689  | 9,43E-30 |
| NCEH1     | -2,07003 | 2,69E-11 |
| TNFRSF10B | -2,07117 | 1,07E-20 |
| EFR3A     | -2,07161 | 4,42E-10 |
| MT1X      | -2,07215 | 1,10E-12 |
| PAM       | -2,07263 | 6,23E-15 |
| DOCK1     | -2,07299 | 4,18E-16 |
| TSHZ1     | -2,07563 | 8,00E-12 |
| SH3GLB1   | -2,07579 | 3,65E-21 |
| BTN2A1    | -2,07687 | 5,19E-06 |
| ARID5A    | -2,08004 | 5,68E-10 |
| FKBP14    | -2,08126 | 6,71E-11 |
| CCM2      | -2,08378 | 7,84E-18 |
| PIP4K2A   | -2,0843  | 1,32E-24 |
| CHRNA1    | -2,08442 | 7,35E-06 |
| PHLDB1    | -2,08764 | 1,18E-21 |
| DENND5B   | -2,08849 | 2,44E-09 |
| SRC       | -2,08948 | 2,62E-20 |
| NRBP2     | -2,09174 | 8,00E-12 |
| RTN2      | -2,09344 | 1,34E-09 |
| S1PR2     | -2,09393 | 7,65E-11 |
| ELOVL2    | -2,09415 | 3,35E-10 |
| C18orf54  | -2,09502 | 9,18E-13 |
| TRAM2     | -2,09855 | 6,07E-28 |
| PANK2     | -2,10015 | 5,49E-20 |
| CAMKK1    | -2,10165 | 6,11E-09 |
| BCL3      | -2,1023  | 6,24E-12 |
| CCNJL     | -2,10299 | 1,22E-06 |
| UBTD1     | -2,10332 | 5,54E-06 |
| SPTBN1    | -2,10619 | 4,63E-36 |
| MET       | -2,10722 | 8,88E-32 |
| SH3D21    | -2,11202 | 1,12E-05 |
| MIB2      | -2,11273 | 3,79E-14 |



|           |          |          |
|-----------|----------|----------|
| ZNF605    | -2,11342 | 2,92E-06 |
| SH2D4A    | -2,11343 | 6,66E-19 |
| ATP6V1B2  | -2,11453 | 1,24E-24 |
| PPP1R13L  | -2,11526 | 8,40E-13 |
| PGM3      | -2,11552 | 1,39E-12 |
| SCCPDH    | -2,1175  | 2,27E-14 |
| XKR8      | -2,11988 | 6,92E-09 |
| E2F7      | -2,12008 | 1,18E-14 |
| PKD2      | -2,12418 | 4,45E-14 |
| TTL       | -2,12949 | 3,07E-22 |
| HPCAL1    | -2,13004 | 1,27E-23 |
| PLK2      | -2,13132 | 1,26E-08 |
| ACTR3     | -2,13342 | 4,05E-18 |
| MOB3A     | -2,1353  | 1,04E-20 |
| ZNF512    | -2,1371  | 5,60E-17 |
| CAMK1D    | -2,13738 | 3,59E-11 |
| EHBP1L1   | -2,14082 | 4,83E-08 |
| HOOK3     | -2,14357 | 3,98E-14 |
| KCTD12    | -2,14408 | 8,26E-07 |
| GPAT3     | -2,14464 | 3,55E-05 |
| ZAK       | -2,14513 | 1,88E-27 |
| LINC00869 | -2,14517 | 0,000321 |
| NXPE3     | -2,14568 | 0,000133 |
| SBDS      | -2,14574 | 1,57E-27 |
| CDV3      | -2,14708 | 1,73E-20 |
| SHANK3    | -2,14748 | 1,02E-09 |
| DTX3L     | -2,14876 | 1,97E-09 |
| STOML1    | -2,14889 | 1,44E-07 |
| LRRC61    | -2,15028 | 3,41E-13 |
| HTRA1     | -2,15139 | 1,17E-21 |
| RCBTB2    | -2,15302 | 4,23E-08 |
| RPL13P5   | -2,1577  | 0,000837 |
| CLCN6     | -2,15776 | 3,04E-05 |
| UROD      | -2,15848 | 7,38E-19 |
| SDCBP     | -2,15925 | 4,62E-11 |
| CAMK2N1   | -2,1595  | 2,81E-08 |
| CPNE2     | -2,16049 | 5,59E-08 |
| MAP1LC3B  | -2,16269 | 1,19E-26 |
| SLC39A14  | -2,16575 | 2,47E-08 |
| KRBOX4    | -2,17068 | 5,68E-10 |
| KLHL15    | -2,17126 | 4,96E-09 |
| HSD17B12  | -2,1723  | 1,90E-21 |
| GNG12     | -2,17266 | 8,13E-21 |
| HSPB11    | -2,17338 | 5,11E-12 |
| FGD1      | -2,17456 | 8,39E-22 |
| RRAS2     | -2,17535 | 4,64E-15 |
| ANO10     | -2,17604 | 3,83E-10 |
| CSTB      | -2,17751 | 1,79E-20 |
| GPATCH11  | -2,17758 | 7,66E-13 |
| CITED2    | -2,17824 | 2,16E-14 |

|           |          |          |
|-----------|----------|----------|
| ZNF319    | -2,18059 | 2,37E-05 |
| BRI3      | -2,18163 | 1,82E-33 |
| PFKFB4    | -2,18266 | 2,79E-06 |
| CCDC109B  | -2,19228 | 1,45E-15 |
| MAPKBP1   | -2,19234 | 5,57E-10 |
| TGFB1     | -2,19359 | 3,17E-21 |
| DOPEY2    | -2,19482 | 8,97E-32 |
| IKBIP     | -2,20227 | 1,66E-06 |
| BIVM      | -2,20253 | 2,31E-05 |
| STPG1     | -2,20408 | 1,56E-09 |
| SH3BGRL3  | -2,20544 | 4,93E-09 |
| SLC16A9   | -2,20547 | 6,32E-11 |
| GLDC      | -2,20736 | 7,17E-05 |
| STARD3NL  | -2,20767 | 1,87E-11 |
| CDON      | -2,20948 | 2,99E-05 |
| ASAP1     | -2,21095 | 4,57E-31 |
| HSF4      | -2,2131  | 2,55E-09 |
| TSPAN9    | -2,2167  | 5,66E-07 |
| FAHD2B    | -2,21722 | 4,75E-05 |
| MKNK2     | -2,21836 | 3,07E-24 |
| SYNJ2     | -2,21904 | 4,72E-23 |
| CASP9     | -2,22023 | 4,93E-07 |
| FCRLB     | -2,22527 | 0,000418 |
| HERC3     | -2,22542 | 0,000146 |
| MEIS1     | -2,22709 | 0,000644 |
| TNS3      | -2,22807 | 5,68E-11 |
| PRKAA2    | -2,23176 | 4,45E-16 |
| BNIP3     | -2,23653 | 1,52E-30 |
| TUBB6     | -2,23705 | 3,46E-21 |
| LRRC37B   | -2,23843 | 1,29E-07 |
| STK17A    | -2,23896 | 9,72E-22 |
| DDA1      | -2,23903 | 4,74E-24 |
| ITPR1     | -2,23918 | 4,33E-12 |
| FOXC1     | -2,2395  | 1,62E-19 |
| PDLIM7    | -2,2425  | 5,09E-23 |
| EPHB2     | -2,24268 | 3,47E-25 |
| CCDC150   | -2,24296 | 8,69E-10 |
| SHOX2     | -2,24343 | 8,68E-07 |
| ARSA      | -2,24366 | 3,52E-06 |
| RAB9A     | -2,24394 | 5,93E-20 |
| ZNF296    | -2,24439 | 2,86E-22 |
| HS3ST3B1  | -2,24679 | 2,74E-09 |
| SLC30A7   | -2,24943 | 2,37E-12 |
| RGS14     | -2,25129 | 1,87E-19 |
| SHROOM1   | -2,25194 | 6,14E-16 |
| GSDMD     | -2,2544  | 7,85E-06 |
| APBA3     | -2,25612 | 2,06E-18 |
| LOC100415 | -2,25625 | 2,63E-12 |
| ADCY7     | -2,25728 | 1,19E-18 |
| GDPD5     | -2,25951 | 0,000601 |

|           |          |          |
|-----------|----------|----------|
| TSHZ3     | -2,26171 | 0,000115 |
| QPCTL     | -2,26199 | 3,15E-14 |
| SHISA4    | -2,26763 | 0,000315 |
| C2orf74   | -2,27215 | 5,87E-10 |
| ZDHHHC14  | -2,27469 | 4,40E-10 |
| C20orf194 | -2,27605 | 1,44E-11 |
| FAM50A    | -2,27732 | 1,79E-36 |
| BEND7     | -2,27891 | 1,48E-08 |
| CUEDC1    | -2,28575 | 6,05E-21 |
| MAP3K10   | -2,28578 | 2,79E-18 |
| CCDC15    | -2,28821 | 3,86E-06 |
| GPR180    | -2,29362 | 8,31E-18 |
| SP110     | -2,2959  | 0,000521 |
| FLNA      | -2,29967 | 3,05E-28 |
| PAQR5     | -2,30009 | 2,10E-16 |
| NEDD4L    | -2,30019 | 4,25E-17 |
| IRF9      | -2,30158 | 1,18E-08 |
| RASSF2    | -2,30248 | 8,86E-08 |
| OTUB2     | -2,30309 | 3,96E-05 |
| MAPK12    | -2,30866 | 3,03E-12 |
| PRKD1     | -2,30993 | 6,52E-05 |
| SMYD3     | -2,31113 | 2,18E-11 |
| SNX8      | -2,31183 | 4,41E-19 |
| TNIK      | -2,31325 | 3,65E-13 |
| GALNT10   | -2,31694 | 1,74E-29 |
| CHST10    | -2,32097 | 4,62E-09 |
| TMEM51    | -2,32369 | 1,33E-22 |
| PRPS2     | -2,32449 | 1,51E-21 |
| PDLIM1    | -2,33302 | 3,71E-35 |
| STK39     | -2,33427 | 1,38E-10 |
| TRIM46    | -2,33478 | 5,95E-05 |
| SMPD1     | -2,33573 | 7,96E-06 |
| CYB5R3    | -2,3363  | 4,16E-19 |
| MYO1B     | -2,33763 | 5,19E-41 |
| MUS81     | -2,33787 | 1,63E-09 |
| ZC2HC1A   | -2,34182 | 4,78E-08 |
| STEAP3    | -2,34245 | 1,93E-16 |
| TNFRSF11A | -2,34303 | 5,19E-09 |
| FOXO3     | -2,34496 | 1,82E-12 |
| TP53BP2   | -2,3465  | 6,49E-22 |
| ZNF266    | -2,34695 | 3,50E-15 |
| FAF1      | -2,34826 | 2,14E-11 |
| KIAA0930  | -2,34827 | 3,23E-16 |
| IL20RB    | -2,35011 | 1,08E-05 |
| HECTD2    | -2,35201 | 1,73E-09 |
| FAM13A    | -2,35207 | 0,000155 |
| NIPAL3    | -2,35329 | 7,63E-09 |
| SPEG      | -2,35655 | 1,12E-06 |
| EFNA5     | -2,36004 | 8,75E-16 |
| KIF5A     | -2,36095 | 0,000445 |

|           |          |          |
|-----------|----------|----------|
| DNMBP     | -2,36798 | 7,23E-13 |
| TRIB2     | -2,37042 | 3,25E-09 |
| MAPRE3    | -2,37115 | 5,20E-08 |
| IPO13     | -2,37322 | 1,93E-13 |
| EML5      | -2,37998 | 0,000703 |
| CHM       | -2,38102 | 2,48E-07 |
| NFKBIE    | -2,38391 | 8,90E-20 |
| PDE4A     | -2,38561 | 9,23E-17 |
| MICALL1   | -2,38861 | 1,38E-30 |
| TBC1D25   | -2,38992 | 3,62E-10 |
| VEGFB     | -2,39201 | 1,96E-16 |
| GPNMB     | -2,39214 | 2,80E-14 |
| MIR22HG   | -2,39514 | 7,90E-08 |
| ZNF462    | -2,39642 | 9,46E-16 |
| ACTN1     | -2,39804 | 1,65E-20 |
| ADM2      | -2,39961 | 7,34E-06 |
| SLC25A16  | -2,40006 | 7,30E-12 |
| FMN1      | -2,40089 | 3,21E-06 |
| PRTFDC1   | -2,40165 | 4,35E-10 |
| GNG5      | -2,40343 | 1,94E-40 |
| STIM1     | -2,40409 | 6,73E-27 |
| BEX4      | -2,40541 | 4,26E-10 |
| MEGF6     | -2,40612 | 7,59E-10 |
| SH3KBP1   | -2,40949 | 5,13E-14 |
| LOC100506 | -2,40963 | 0,000685 |
| PLK3      | -2,41061 | 8,63E-09 |
| ARNTL     | -2,41204 | 8,36E-08 |
| DDAH1     | -2,41281 | 1,29E-11 |
| PELI1     | -2,41346 | 4,19E-06 |
| DUSP7     | -2,41627 | 1,66E-08 |
| CARD10    | -2,42015 | 8,25E-12 |
| C3orf67   | -2,42287 | 7,77E-06 |
| SLC4A3    | -2,42498 | 3,50E-12 |
| HECW2     | -2,4291  | 1,26E-22 |
| LACC1     | -2,43127 | 5,79E-08 |
| GLIS2     | -2,43292 | 2,59E-28 |
| CCDC88B   | -2,43307 | 0,000116 |
| ETHE1     | -2,43322 | 6,49E-16 |
| RAI14     | -2,43596 | 2,56E-21 |
| SMARCD3   | -2,43745 | 2,96E-12 |
| SLC25A22  | -2,43835 | 5,73E-32 |
| DENND5A   | -2,43887 | 1,71E-15 |
| FSCN1     | -2,43912 | 5,90E-32 |
| SEMA4B    | -2,4418  | 1,35E-29 |
| LOC100130 | -2,44296 | 7,40E-06 |
| TMCC1-AS1 | -2,44358 | 5,89E-05 |
| FAM57A    | -2,44454 | 8,09E-18 |
| C11orf68  | -2,44794 | 7,52E-31 |
| KLF12     | -2,4482  | 3,03E-12 |
| CCDC93    | -2,44859 | 2,72E-25 |

|           |          |          |
|-----------|----------|----------|
| MAPK8IP3  | -2,45092 | 3,45E-06 |
| NAB1      | -2,4575  | 8,29E-14 |
| ANKRD13A  | -2,46023 | 1,98E-11 |
| DPY19L2P1 | -2,46046 | 0,000122 |
| ARMCX1    | -2,4627  | 3,63E-06 |
| SRGAP1    | -2,4644  | 1,60E-14 |
| APP       | -2,46509 | 2,21E-48 |
| CHST15    | -2,46834 | 4,00E-30 |
| KLHL21    | -2,47145 | 4,03E-32 |
| FERMT2    | -2,47289 | 9,53E-30 |
| TENM4     | -2,47373 | 4,04E-09 |
| PQLC2     | -2,47717 | 1,82E-18 |
| SERINC2   | -2,4824  | 6,94E-13 |
| SDC2      | -2,48263 | 2,92E-22 |
| WSCD1     | -2,48619 | 4,25E-15 |
| EHD4      | -2,48952 | 1,99E-27 |
| SIRT2     | -2,49063 | 2,31E-15 |
| LRRC8E    | -2,4919  | 3,25E-19 |
| TPST2     | -2,49713 | 3,94E-14 |
| UNC13A    | -2,50031 | 0,000545 |
| CAP1      | -2,50033 | 1,05E-26 |
| CHST11    | -2,50162 | 6,60E-18 |
| CXCR4     | -2,50355 | 1,58E-15 |
| WWTR1     | -2,5054  | 3,24E-39 |
| MYH9      | -2,50774 | 7,58E-26 |
| IFI27L2   | -2,51135 | 0,000244 |
| CCDC18    | -2,51569 | 2,61E-08 |
| SUSD6     | -2,51809 | 2,15E-17 |
| CAPRIN2   | -2,51882 | 7,32E-17 |
| KLF6      | -2,52358 | 1,44E-07 |
| CLIP2     | -2,52888 | 2,50E-27 |
| LHFPL2    | -2,53131 | 3,77E-29 |
| CSRNP1    | -2,53316 | 8,53E-17 |
| RBCK1     | -2,53409 | 4,96E-47 |
| INSIG2    | -2,53468 | 1,37E-12 |
| GANC      | -2,53785 | 1,97E-12 |
| STK17B    | -2,54061 | 4,92E-17 |
| SWAP70    | -2,54358 | 2,59E-24 |
| FAH       | -2,54714 | 4,86E-31 |
| WDR66     | -2,54979 | 2,87E-05 |
| HDAC4     | -2,55449 | 0,000105 |
| PLEC      | -2,55463 | 1,10E-09 |
| GALNT14   | -2,55758 | 2,17E-36 |
| GALNT2    | -2,55775 | 5,62E-28 |
| GALNT18   | -2,56064 | 5,97E-21 |
| GPC1      | -2,56575 | 7,56E-20 |
| STXBP1    | -2,56668 | 1,25E-28 |
| GPR157    | -2,57136 | 4,87E-05 |
| PML       | -2,57494 | 8,57E-10 |
| IFNLR1    | -2,57532 | 1,14E-10 |

|          |          |          |
|----------|----------|----------|
| KLHL5    | -2,57565 | 3,55E-27 |
| MED8     | -2,57625 | 1,07E-29 |
| ZBED6CL  | -2,58468 | 1,96E-14 |
| MAMLD1   | -2,58716 | 4,36E-09 |
| DOCK10   | -2,58738 | 5,28E-07 |
| PITPNM2  | -2,59049 | 5,22E-16 |
| VASP     | -2,59498 | 2,62E-42 |
| LRP1     | -2,59809 | 4,20E-06 |
| DRAP1    | -2,59829 | 4,11E-38 |
| ERAP1    | -2,60139 | 9,15E-30 |
| KAZN     | -2,60151 | 2,44E-20 |
| PRSS53   | -2,61254 | 1,01E-08 |
| CAMK2D   | -2,61362 | 4,15E-21 |
| RAB31    | -2,61597 | 9,22E-10 |
| TNS1     | -2,61812 | 1,14E-12 |
| PDP1     | -2,61875 | 3,39E-30 |
| SLC22A4  | -2,61976 | 4,37E-07 |
| ATP2B4   | -2,61986 | 5,85E-14 |
| TMEM44   | -2,62214 | 1,50E-15 |
| PAQR3    | -2,62623 | 7,82E-24 |
| HOMER3   | -2,62736 | 4,08E-43 |
| TMEM86B  | -2,62816 | 8,39E-09 |
| TRAF5    | -2,63019 | 1,18E-15 |
| TPM4     | -2,63072 | 8,80E-58 |
| SCMH1    | -2,63218 | 1,85E-08 |
| NTN1     | -2,63289 | 2,50E-13 |
| FAM114A1 | -2,63331 | 2,92E-09 |
| MAP7D1   | -2,63337 | 6,22E-26 |
| FOLR1    | -2,6386  | 1,46E-05 |
| FGF18    | -2,63972 | 1,19E-06 |
| PLOD1    | -2,65961 | 3,26E-29 |
| SPAG4    | -2,66077 | 4,55E-08 |
| SPTBN4   | -2,66094 | 2,22E-07 |
| SYBU     | -2,66483 | 2,85E-11 |
| LBX2-AS1 | -2,66602 | 1,88E-05 |
| COLGALT1 | -2,66764 | 1,96E-52 |
| RBPMS    | -2,67241 | 4,17E-40 |
| CKAP4    | -2,67605 | 5,13E-44 |
| TAP2     | -2,67853 | 2,31E-21 |
| MALT1    | -2,68128 | 6,15E-40 |
| PTGER4   | -2,68872 | 2,26E-06 |
| PMEPA1   | -2,68978 | 1,64E-31 |
| TMX3     | -2,69207 | 1,16E-23 |
| RTTN     | -2,69378 | 1,59E-13 |
| TREX1    | -2,69503 | 4,28E-11 |
| LIMA1    | -2,69699 | 3,77E-13 |
| VCL      | -2,69864 | 3,08E-16 |
| ST5      | -2,69901 | 2,03E-12 |
| PALLD    | -2,70032 | 4,51E-21 |
| ABHD6    | -2,70045 | 8,80E-11 |

|           |          |          |
|-----------|----------|----------|
| SLC41A2   | -2,7039  | 1,21E-16 |
| TGFBR2    | -2,70499 | 1,33E-16 |
| LOC103091 | -2,70529 | 2,18E-07 |
| ZIC5      | -2,7054  | 0,000361 |
| BTBD11    | -2,70651 | 8,07E-12 |
| DDX58     | -2,70727 | 7,60E-07 |
| CDR2L     | -2,7076  | 5,90E-16 |
| PEA15     | -2,70937 | 3,70E-33 |
| AMIGO3    | -2,71419 | 6,65E-17 |
| RTCA      | -2,71518 | 4,41E-38 |
| BOLA3-AS1 | -2,71676 | 1,44E-06 |
| HTATSF1P2 | -2,71999 | 8,60E-07 |
| IFNGR2    | -2,73052 | 2,82E-19 |
| AK4       | -2,73263 | 9,03E-42 |
| LRP4      | -2,73281 | 4,90E-12 |
| CTSB      | -2,7355  | 1,31E-17 |
| IFFO2     | -2,73621 | 1,82E-25 |
| BMP1      | -2,73821 | 3,26E-33 |
| SMAD3     | -2,73841 | 7,13E-17 |
| LINC01128 | -2,73896 | 1,94E-13 |
| NKX3-1    | -2,74438 | 2,29E-11 |
| COTL1     | -2,74916 | 9,08E-38 |
| ACSL4     | -2,74925 | 4,98E-23 |
| PLP2      | -2,75094 | 5,20E-44 |
| MATN2     | -2,75513 | 1,33E-31 |
| ISM1      | -2,75863 | 5,19E-10 |
| ALDH3B1   | -2,7593  | 9,87E-06 |
| AMIGO2    | -2,76059 | 9,03E-25 |
| CDK14     | -2,76096 | 6,42E-10 |
| INHBB     | -2,76422 | 6,45E-24 |
| PRKCE     | -2,76736 | 1,59E-07 |
| FNDC3B    | -2,7679  | 5,24E-47 |
| LOC171391 | -2,76794 | 8,94E-05 |
| ANKMY2    | -2,76851 | 3,33E-24 |
| RAB3B     | -2,77158 | 1,23E-12 |
| LDHA      | -2,7985  | 1,40E-54 |
| LRRC6     | -2,79877 | 2,38E-05 |
| LMF2      | -2,79974 | 2,32E-31 |
| HSPG2     | -2,81322 | 4,06E-28 |
| GUCY1B3   | -2,8134  | 2,33E-10 |
| SOAT1     | -2,81369 | 1,62E-28 |
| IL6ST     | -2,8188  | 6,51E-26 |
| EVA1B     | -2,82872 | 2,93E-09 |
| PTGR1     | -2,82996 | 1,21E-12 |
| VLDLR     | -2,83332 | 3,65E-07 |
| PRDM11    | -2,83432 | 9,61E-10 |
| RP2       | -2,83448 | 1,09E-12 |
| FYN       | -2,83681 | 3,86E-12 |
| OSMR      | -2,8371  | 1,17E-14 |
| CD59      | -2,83893 | 2,03E-15 |

|           |          |          |
|-----------|----------|----------|
| FAM129A   | -2,83946 | 5,00E-07 |
| PDGFC     | -2,84193 | 1,54E-07 |
| SGPP2     | -2,84448 | 9,16E-11 |
| SGTB      | -2,84631 | 6,10E-18 |
| GBX2      | -2,84935 | 0,000335 |
| PITPNM1   | -2,85052 | 1,34E-23 |
| SH3TC1    | -2,85303 | 2,16E-13 |
| CACNA2D3  | -2,85416 | 0,00019  |
| DPY19L2P2 | -2,85453 | 0,000412 |
| ARL9      | -2,85706 | 4,05E-05 |
| CXCL12    | -2,85954 | 3,75E-24 |
| PLA2G4C   | -2,86306 | 0,000903 |
| GPR68     | -2,86745 | 3,51E-12 |
| SH3BGRL   | -2,86787 | 2,76E-17 |
| RPS6KA2   | -2,86861 | 5,87E-19 |
| CD27-AS1  | -2,87064 | 0,000601 |
| COL23A1   | -2,87293 | 0,000117 |
| C16orf62  | -2,87389 | 1,54E-21 |
| SLC8B1    | -2,87433 | 2,27E-20 |
| CARS2     | -2,87832 | 1,33E-45 |
| MCOLN1    | -2,88047 | 7,01E-26 |
| HNRNPU-A  | -2,88309 | 2,59E-07 |
| C9orf72   | -2,88311 | 0,000981 |
| ABTB2     | -2,88496 | 6,41E-36 |
| PPAP2B    | -2,88509 | 3,28E-14 |
| ZNF155    | -2,88994 | 1,96E-08 |
| SASH1     | -2,89258 | 2,46E-09 |
| LINC01116 | -2,89575 | 3,97E-21 |
| FUT4      | -2,89591 | 4,17E-12 |
| SDC4      | -2,89702 | 4,73E-24 |
| NUPL2     | -2,89781 | 7,30E-10 |
| SNHG15    | -2,89983 | 4,77E-07 |
| LAMA3     | -2,90023 | 4,08E-28 |
| LDLRAD4   | -2,90699 | 0,001006 |
| CYLD      | -2,90948 | 2,08E-07 |
| ALDH1A3   | -2,91122 | 3,09E-05 |
| FSTL3     | -2,91175 | 2,23E-15 |
| ACO1      | -2,9146  | 1,07E-16 |
| RRAGC     | -2,92488 | 6,31E-36 |
| FAM89A    | -2,93067 | 4,57E-07 |
| SPAG1     | -2,93209 | 9,19E-13 |
| ZNF774    | -2,9341  | 6,90E-05 |
| BICD1     | -2,94013 | 7,29E-29 |
| PPP1R18   | -2,94463 | 4,25E-35 |
| FHL3      | -2,94484 | 3,37E-35 |
| GOLM1     | -2,94561 | 1,61E-49 |
| IFITM3    | -2,95377 | 1,07E-13 |
| THEMIS2   | -2,9549  | 2,16E-06 |
| KLF8      | -2,95922 | 1,66E-08 |
| APBA1     | -2,9664  | 8,05E-14 |



|           |          |          |
|-----------|----------|----------|
| MICB      | -2,97034 | 2,32E-14 |
| ADGRE5    | -2,97274 | 5,12E-16 |
| LOC730102 | -2,9745  | 5,78E-05 |
| SLC2A1    | -2,9753  | 3,27E-19 |
| ERRFI1    | -2,97756 | 3,28E-18 |
| DNM1      | -2,98098 | 1,68E-31 |
| GATA2     | -2,98746 | 3,13E-24 |
| FAM126A   | -2,98995 | 6,33E-24 |
| DYRK3     | -2,9955  | 4,55E-30 |
| LOC100507 | -2,99731 | 0,000176 |
| SLC37A2   | -3,00083 | 1,40E-05 |
| RIMS2     | -3,00285 | 1,50E-09 |
| DCLK2     | -3,00513 | 3,76E-08 |
| ALS2CL    | -3,00845 | 1,24E-11 |
| ARFGAP3   | -3,01659 | 5,66E-35 |
| PLXNC1    | -3,02377 | 0,000571 |
| PPARG     | -3,02461 | 6,49E-14 |
| CTSL      | -3,03016 | 1,45E-18 |
| PFKP      | -3,03103 | 2,08E-29 |
| OGFRL1    | -3,03242 | 1,71E-32 |
| LYPD1     | -3,03531 | 8,04E-20 |
| FILIP1L   | -3,03838 | 2,50E-09 |
| RNF207    | -3,03928 | 1,44E-10 |
| NES       | -3,04004 | 4,36E-37 |
| DSE       | -3,04032 | 1,29E-17 |
| BHLHE40   | -3,0436  | 1,69E-41 |
| SH3PXD2B  | -3,04375 | 1,20E-42 |
| SORBS3    | -3,04524 | 1,58E-55 |
| ICAM5     | -3,04841 | 8,88E-07 |
| CYSTM1    | -3,0531  | 2,68E-54 |
| RAET1K    | -3,05491 | 0,000242 |
| FUT11     | -3,05731 | 5,85E-25 |
| KCNS3     | -3,05809 | 1,57E-10 |
| TCF7      | -3,05815 | 7,96E-28 |
| ADCY9     | -3,06389 | 8,70E-21 |
| MTSS1     | -3,06804 | 3,64E-07 |
| CCNYL1    | -3,06988 | 1,04E-24 |
| ZNF697    | -3,07069 | 4,91E-24 |
| PORCN     | -3,07213 | 2,22E-15 |
| LINC00623 | -3,07267 | 4,29E-16 |
| HOXA4     | -3,07521 | 9,14E-11 |
| RIN3      | -3,07673 | 1,28E-15 |
| PXDN      | -3,07753 | 1,20E-31 |
| NXN       | -3,081   | 1,09E-39 |
| LPCAT2    | -3,08471 | 5,16E-16 |
| DCBLD2    | -3,08525 | 1,20E-26 |
| MCC       | -3,09118 | 1,20E-20 |
| TPST1     | -3,09191 | 1,08E-18 |
| RENBP     | -3,09281 | 5,98E-10 |
| GPR39     | -3,09634 | 2,21E-10 |

|           |          |          |
|-----------|----------|----------|
| TAP1      | -3,09844 | 1,85E-11 |
| CDK6      | -3,10065 | 5,45E-09 |
| POU3F3    | -3,10152 | 6,51E-14 |
| ZMYM6NB   | -3,10208 | 1,16E-13 |
| ELL2      | -3,10239 | 3,94E-22 |
| OTUD1     | -3,10392 | 9,49E-15 |
| ARNTL2    | -3,10904 | 2,60E-22 |
| MB21D1    | -3,11018 | 6,99E-19 |
| PDK1      | -3,11392 | 1,19E-17 |
| ULBP3     | -3,11737 | 0,000136 |
| HOXC4     | -3,11782 | 2,16E-09 |
| MXRA7     | -3,12052 | 4,92E-22 |
| HES4      | -3,12361 | 1,60E-33 |
| CA12      | -3,12425 | 4,26E-09 |
| CEP112    | -3,1272  | 1,91E-11 |
| NFIL3     | -3,1274  | 1,24E-09 |
| ALOXE3    | -3,12784 | 2,28E-12 |
| TRPM2     | -3,13351 | 7,48E-36 |
| OCIAD2    | -3,1338  | 4,69E-40 |
| ARHGAP26  | -3,13426 | 4,05E-10 |
| MARCKS    | -3,13469 | 8,96E-26 |
| TMEM163   | -3,1535  | 2,45E-17 |
| GPRC5B    | -3,155   | 3,74E-12 |
| JAK1      | -3,15504 | 7,04E-43 |
| HACD1     | -3,15536 | 8,87E-23 |
| TSPAN10   | -3,157   | 0,000312 |
| LIMS1     | -3,15856 | 1,79E-46 |
| CCDC82    | -3,16242 | 6,83E-12 |
| SPRY2     | -3,16755 | 4,72E-14 |
| FOSL2     | -3,17175 | 4,65E-40 |
| WWC3      | -3,1748  | 2,27E-52 |
| NAGS      | -3,17595 | 0,000471 |
| PHLDA2    | -3,1786  | 3,35E-11 |
| TSPAN4    | -3,18118 | 1,75E-21 |
| HLA-F-AS1 | -3,18152 | 0,000182 |
| TFEB      | -3,18288 | 2,84E-10 |
| SNAI1     | -3,18378 | 1,07E-11 |
| DYNLT3    | -3,18473 | 2,34E-13 |
| C12orf75  | -3,18614 | 1,28E-51 |
| PFKFB3    | -3,18918 | 1,04E-19 |
| FABP5     | -3,19366 | 1,29E-60 |
| TRIM7     | -3,19383 | 2,98E-10 |
| SPNS2     | -3,19536 | 6,74E-16 |
| PVR       | -3,19907 | 1,74E-18 |
| AP1S2     | -3,20064 | 1,08E-27 |
| ZCCHC24   | -3,2011  | 4,24E-12 |
| PMAIP1    | -3,20118 | 4,48E-19 |
| EHD3      | -3,20378 | 6,40E-22 |
| HNMT      | -3,20448 | 1,64E-08 |
| PAOX      | -3,21252 | 1,42E-10 |

|           |          |          |
|-----------|----------|----------|
| LOC101927 | -3,21283 | 1,41E-09 |
| HSD17B14  | -3,21335 | 2,23E-23 |
| KLF7      | -3,2245  | 1,22E-40 |
| A4GALT    | -3,22462 | 1,62E-08 |
| WHAMMP    | -3,22512 | 5,80E-06 |
| CDKL1     | -3,22719 | 2,37E-15 |
| HERC6     | -3,22915 | 1,43E-07 |
| MACROD2   | -3,23321 | 8,42E-13 |
| ANXA3     | -3,24017 | 1,92E-20 |
| TBC1D2    | -3,25323 | 5,49E-13 |
| ADPRH     | -3,25871 | 1,37E-10 |
| ZYX       | -3,25978 | 2,68E-42 |
| LRP12     | -3,26014 | 3,64E-60 |
| STARD8    | -3,27107 | 1,67E-11 |
| LETM2     | -3,27344 | 2,44E-07 |
| PPP2R5B   | -3,27996 | 1,20E-33 |
| TMEM249   | -3,28346 | 0,000376 |
| FMNL1     | -3,28494 | 3,19E-40 |
| MT1F      | -3,28807 | 1,82E-16 |
| CRIM1     | -3,28814 | 6,51E-26 |
| SCN1B     | -3,29344 | 4,42E-07 |
| OSBPL6    | -3,29354 | 1,36E-09 |
| BARX2     | -3,2999  | 6,36E-06 |
| TRIM6     | -3,30621 | 0,000896 |
| ZNF441    | -3,30683 | 4,44E-07 |
| SEC14L1P1 | -3,30812 | 0,000643 |
| LGALS1    | -3,31619 | 3,36E-26 |
| RIPK4     | -3,31676 | 9,88E-46 |
| SEC14L2   | -3,32418 | 1,01E-13 |
| P3H2      | -3,32586 | 2,28E-46 |
| EFNB2     | -3,34394 | 5,38E-42 |
| ITPRIP    | -3,34405 | 9,29E-14 |
| RCAN1     | -3,34755 | 4,36E-24 |
| IFIH1     | -3,34899 | 1,04E-09 |
| SLCO3A1   | -3,35273 | 3,54E-36 |
| THBD      | -3,3541  | 8,60E-26 |
| C3orf18   | -3,35629 | 0,000102 |
| NFKBID    | -3,35689 | 4,04E-07 |
| FOXD1     | -3,35914 | 1,35E-07 |
| ELK3      | -3,35989 | 7,86E-18 |
| ZBTB47    | -3,37594 | 3,17E-07 |
| STAT1     | -3,37675 | 1,68E-19 |
| IRF5      | -3,37919 | 2,62E-19 |
| PTPN14    | -3,37921 | 2,68E-58 |
| CHST7     | -3,38078 | 4,06E-12 |
| GADD45A   | -3,38153 | 5,46E-42 |
| KIAA0226L | -3,38266 | 0,000239 |
| TMEM55A   | -3,38482 | 5,80E-37 |
| SMARCA1   | -3,38546 | 9,77E-16 |
| ISG20     | -3,38888 | 2,35E-16 |

|          |          |          |
|----------|----------|----------|
| DAGLA    | -3,39193 | 2,89E-22 |
| TLN2     | -3,39251 | 7,44E-29 |
| APOBEC3B | -3,39403 | 5,16E-35 |
| ZBTB38   | -3,39482 | 2,68E-48 |
| PARVA    | -3,39582 | 1,53E-40 |
| DLX2     | -3,39792 | 4,23E-33 |
| GLB1L    | -3,40119 | 1,16E-16 |
| VSTM2L   | -3,40295 | 4,75E-15 |
| CILP2    | -3,40355 | 3,27E-13 |
| PLOD2    | -3,40504 | 3,88E-58 |
| CTH      | -3,40521 | 1,91E-17 |
| PPP1R3B  | -3,40536 | 2,05E-53 |
| TMEM133  | -3,40601 | 0,000752 |
| MOCOS    | -3,40741 | 2,35E-19 |
| IGF2BP2  | -3,40791 | 5,64E-40 |
| SPATS2L  | -3,41126 | 2,26E-56 |
| ENPEP    | -3,41377 | 2,12E-28 |
| IFI35    | -3,41587 | 6,67E-13 |
| ELFN2    | -3,41657 | 2,64E-08 |
| GPC4     | -3,41688 | 1,05E-44 |
| HOXC8    | -3,42685 | 0,000539 |
| IRS2     | -3,43127 | 4,60E-20 |
| TMEM56   | -3,43551 | 6,67E-20 |
| RNASET2  | -3,44018 | 5,18E-41 |
| FNIP2    | -3,44692 | 1,73E-10 |
| EBF4     | -3,45019 | 0,000268 |
| LTBP2    | -3,45045 | 4,92E-16 |
| BDKRB2   | -3,45169 | 0,000702 |
| TTN-AS1  | -3,45209 | 3,20E-17 |
| CD44     | -3,45936 | 9,96E-59 |
| FRMD3    | -3,46712 | 3,20E-10 |
| POU6F1   | -3,46787 | 8,78E-14 |
| FRMPD3   | -3,4727  | 1,21E-06 |
| GLS      | -3,47524 | 2,80E-43 |
| GBP2     | -3,47648 | 7,45E-05 |
| CCDC106  | -3,48118 | 1,28E-08 |
| TUBB2B   | -3,48203 | 1,85E-19 |
| KCNIP3   | -3,48209 | 3,14E-44 |
| SLFN11   | -3,48717 | 1,43E-21 |
| CCDC88A  | -3,48851 | 2,85E-38 |
| SIX2     | -3,49488 | 3,36E-10 |
| STRIP2   | -3,49565 | 2,03E-18 |
| MFSD1    | -3,50692 | 4,79E-33 |
| TGFA     | -3,51301 | 4,45E-21 |
| HOTAIRM1 | -3,51703 | 1,12E-06 |
| SLC2A6   | -3,51966 | 5,53E-12 |
| NAV1     | -3,52044 | 6,38E-16 |
| GOLGA8B  | -3,52476 | 5,54E-08 |
| IL1R2    | -3,5267  | 1,50E-06 |
| PLXNA2   | -3,52881 | 1,37E-07 |

|           |          |          |
|-----------|----------|----------|
| SOX7      | -3,53517 | 5,85E-05 |
| NFKBIZ    | -3,54171 | 1,01E-17 |
| EGLN3     | -3,54247 | 7,74E-35 |
| PHYH      | -3,54669 | 6,56E-34 |
| NFKB2     | -3,54892 | 3,15E-48 |
| MIRLET7B+ | -3,55038 | 5,53E-07 |
| TMEM217   | -3,55466 | 2,78E-09 |
| STAMBPL1  | -3,55602 | 1,60E-09 |
| IL1RAP    | -3,55696 | 1,55E-12 |
| DEGS1     | -3,55929 | 5,69E-37 |
| ZNF513    | -3,55999 | 1,41E-06 |
| LINC01508 | -3,56587 | 7,53E-07 |
| FAM219A   | -3,5719  | 1,85E-22 |
| GRB10     | -3,57563 | 7,60E-10 |
| RAB6B     | -3,57583 | 5,87E-26 |
| BHLHA15   | -3,57664 | 3,25E-08 |
| TMSB4X    | -3,58301 | 1,24E-92 |
| EPB41L4A  | -3,5862  | 3,62E-15 |
| ZNF532    | -3,58973 | 2,53E-52 |
| PTPRE     | -3,59245 | 6,13E-08 |
| WNT5B     | -3,59403 | 8,70E-10 |
| HOXB6     | -3,59753 | 0,000239 |
| BISPR     | -3,5984  | 3,90E-10 |
| MAPK8IP2  | -3,59929 | 3,87E-16 |
| HELZ2     | -3,60513 | 4,25E-15 |
| FKBP9P1   | -3,61066 | 2,60E-06 |
| SAMD14    | -3,61502 | 5,92E-07 |
| ST3GAL1   | -3,62455 | 7,28E-22 |
| PRNP      | -3,62643 | 2,79E-41 |
| KLHL29    | -3,62696 | 1,61E-20 |
| PKP1      | -3,62913 | 6,78E-13 |
| APOL2     | -3,63248 | 1,35E-09 |
| CDK5R2    | -3,63279 | 0,000993 |
| FAM63B    | -3,63419 | 1,87E-20 |
| CD83      | -3,63918 | 3,73E-36 |
| SLCO4A1   | -3,64491 | 1,82E-26 |
| FAM71F2   | -3,64598 | 1,60E-05 |
| PPM1K     | -3,65188 | 1,54E-11 |
| LIMD2     | -3,65768 | 6,69E-20 |
| PLA2R1    | -3,66763 | 0,000291 |
| SAMHD1    | -3,66853 | 6,41E-18 |
| HAGLR     | -3,67348 | 2,98E-34 |
| FGFR1     | -3,67545 | 1,11E-86 |
| SLC35E4   | -3,67677 | 1,03E-37 |
| LINC01410 | -3,68062 | 5,48E-05 |
| SNX10     | -3,68271 | 1,74E-22 |
| P3H1      | -3,68319 | 2,14E-67 |
| SERPINB8  | -3,68411 | 2,00E-20 |
| HSPA12A   | -3,68468 | 1,56E-37 |
| PXDC1     | -3,69329 | 7,08E-51 |

|           |          |           |
|-----------|----------|-----------|
| MTCL1     | -3,70296 | 4,65E-30  |
| RUSC2     | -3,70324 | 1,72E-25  |
| ADORA1    | -3,70649 | 2,12E-18  |
| LGALS3BP  | -3,71644 | 0,000391  |
| IFITM1    | -3,72066 | 1,40E-10  |
| ADORA2B   | -3,73045 | 2,86E-25  |
| HYAL3     | -3,73359 | 2,31E-12  |
| EFHD2     | -3,74344 | 7,17E-56  |
| RRAGD     | -3,7497  | 7,52E-26  |
| UBE2L6    | -3,75192 | 6,03E-15  |
| ARL4C     | -3,75282 | 1,49E-77  |
| GGT1      | -3,75518 | 1,24E-62  |
| LIMCH1    | -3,76166 | 5,07E-11  |
| SYDE1     | -3,76373 | 2,41E-42  |
| PITX2     | -3,77118 | 2,34E-13  |
| THRB      | -3,77451 | 2,62E-23  |
| IFIT5     | -3,7805  | 4,31E-18  |
| PLSCR1    | -3,78337 | 2,13E-68  |
| IL11      | -3,78715 | 1,51E-05  |
| DGCR5     | -3,8003  | 3,42E-26  |
| RASGRP1   | -3,80199 | 5,14E-15  |
| ATAD3B    | -3,80655 | 9,33E-27  |
| LOXL1     | -3,80977 | 6,91E-36  |
| POU2F2    | -3,80983 | 2,73E-05  |
| FOXO1     | -3,81389 | 5,35E-21  |
| IL4R      | -3,82119 | 2,46E-26  |
| HOXA11    | -3,8215  | 3,72E-08  |
| PROCR     | -3,82802 | 5,05E-08  |
| GLIPR2    | -3,83006 | 1,33E-30  |
| ENO2      | -3,83424 | 2,90E-33  |
| CREG2     | -3,83527 | 7,44E-05  |
| ADAMTS9   | -3,83826 | 1,15E-10  |
| LZTS3     | -3,84147 | 2,81E-15  |
| C14orf159 | -3,84216 | 3,82E-20  |
| TPM1      | -3,85105 | 8,61E-109 |
| PTRF      | -3,85112 | 4,41E-61  |
| GAB3      | -3,85161 | 0,000408  |
| AMZ1      | -3,85306 | 3,12E-20  |
| COL5A2    | -3,85724 | 1,16E-39  |
| HYI       | -3,86201 | 1,33E-20  |
| THBS3     | -3,86318 | 1,62E-61  |
| PLEKHA2   | -3,8658  | 2,24E-32  |
| TRNP1     | -3,87669 | 1,96E-37  |
| GFPT2     | -3,87983 | 1,61E-30  |
| RHEBL1    | -3,8819  | 6,41E-09  |
| FAM228B   | -3,89046 | 8,43E-11  |
| CLCF1     | -3,8915  | 4,98E-09  |
| VEPH1     | -3,89705 | 4,32E-11  |
| UAP1L1    | -3,89759 | 2,31E-72  |
| IRF1      | -3,89962 | 1,72E-40  |

|           |          |          |
|-----------|----------|----------|
| SPSB1     | -3,90769 | 5,79E-18 |
| CTTNBP2   | -3,90945 | 0,000862 |
| NPAS2     | -3,91099 | 8,52E-37 |
| TRANK1    | -3,91207 | 6,54E-06 |
| BST2      | -3,91639 | 2,96E-12 |
| CDKL5     | -3,91644 | 1,10E-12 |
| ODF3B     | -3,91727 | 5,16E-09 |
| ITPKA     | -3,92387 | 1,95E-22 |
| SMIM3     | -3,92884 | 9,72E-68 |
| FLT3LG    | -3,93842 | 1,65E-12 |
| LYST      | -3,94039 | 1,03E-24 |
| ROBO3     | -3,94525 | 4,23E-18 |
| TIMP2     | -3,95413 | 1,88E-81 |
| TNFSF9    | -3,95821 | 2,28E-10 |
| GABARAPL  | -3,95988 | 1,61E-07 |
| SETBP1    | -3,96193 | 7,06E-13 |
| SLC6A8    | -3,96851 | 8,50E-26 |
| ARL4D     | -3,97109 | 4,11E-38 |
| RAB11FIP5 | -3,97715 | 8,49E-20 |
| MYLK      | -3,98047 | 8,96E-41 |
| HBEGF     | -3,98426 | 3,94E-26 |
| FAM92A1   | -3,98506 | 2,87E-16 |
| IRF7      | -3,98793 | 1,65E-24 |
| ST6GALNA4 | -3,99399 | 1,77E-26 |
| RRAS      | -3,99673 | 1,93E-28 |
| APBB1     | -4,00106 | 6,64E-19 |
| ADAP2     | -4,00335 | 1,13E-32 |
| ITGA6     | -4,00574 | 7,03E-53 |
| ANK2      | -4,00591 | 1,01E-13 |
| PLBD1     | -4,0096  | 2,41E-33 |
| LMO1      | -4,01005 | 2,09E-06 |
| SLC16A3   | -4,01052 | 4,68E-18 |
| SFXN3     | -4,01117 | 7,18E-47 |
| ISPD      | -4,01144 | 5,64E-06 |
| GPB1      | -4,02083 | 7,31E-18 |
| PLEK2     | -4,02171 | 3,97E-67 |
| TGFB2     | -4,02192 | 1,12E-10 |
| COL14A1   | -4,02457 | 9,47E-10 |
| DDX11L2   | -4,02767 | 3,94E-06 |
| ASPHD2    | -4,02798 | 1,14E-34 |
| CYP4V2    | -4,03026 | 9,96E-13 |
| EREG      | -4,03227 | 8,94E-05 |
| KBTBD11   | -4,03699 | 1,40E-22 |
| HOXD8     | -4,04133 | 1,63E-13 |
| SUSD1     | -4,04255 | 5,36E-55 |
| GRK5      | -4,04567 | 1,16E-23 |
| PGM1      | -4,05402 | 1,29E-50 |
| PTGES     | -4,05583 | 4,51E-21 |
| MICAL1    | -4,05894 | 3,94E-32 |
| NCALD     | -4,06069 | 4,13E-08 |

|          |          |           |
|----------|----------|-----------|
| CRAT     | -4,06085 | 1,94E-17  |
| OAS3     | -4,06853 | 0,000103  |
| BCL2L15  | -4,06914 | 6,37E-12  |
| IL6R     | -4,0769  | 4,83E-09  |
| TBX19    | -4,07822 | 0,000846  |
| B3GNT5   | -4,07938 | 4,64E-08  |
| MAPRE2   | -4,09006 | 1,01E-37  |
| LCP1     | -4,09159 | 5,00E-18  |
| CMTM7    | -4,09415 | 1,91E-28  |
| GNAI1    | -4,09852 | 9,75E-27  |
| HPGD     | -4,11329 | 3,35E-08  |
| BTN3A3   | -4,11369 | 1,99E-09  |
| DNAH17   | -4,11601 | 5,26E-08  |
| CLTCL1   | -4,12191 | 1,62E-41  |
| CAMK4    | -4,13368 | 1,49E-10  |
| ARHGAP29 | -4,13388 | 3,52E-37  |
| SH3RF2   | -4,1354  | 3,53E-17  |
| MYADM    | -4,14164 | 3,30E-34  |
| PCOLCE2  | -4,14741 | 3,56E-41  |
| S100A6   | -4,15312 | 1,82E-37  |
| SCARF2   | -4,159   | 2,28E-40  |
| AMPD3    | -4,15996 | 3,67E-24  |
| PPP1R15A | -4,16071 | 4,60E-50  |
| NMI      | -4,16379 | 1,60E-29  |
| WTIP     | -4,16393 | 2,62E-34  |
| P4HA2    | -4,17683 | 2,39E-43  |
| CMTM3    | -4,17871 | 2,83E-33  |
| RND3     | -4,18262 | 4,74E-66  |
| DENND3   | -4,18443 | 7,17E-19  |
| ECE1     | -4,18809 | 2,59E-102 |
| PARP12   | -4,18835 | 3,97E-27  |
| FABP6    | -4,18981 | 3,03E-24  |
| CPQ      | -4,19062 | 1,61E-18  |
| TOR4A    | -4,19066 | 1,94E-43  |
| REC8     | -4,20882 | 8,41E-06  |
| KIF26B   | -4,21314 | 7,57E-36  |
| CCDC68   | -4,21676 | 4,14E-09  |
| FAM171A1 | -4,21895 | 1,31E-69  |
| DDX60L   | -4,22185 | 4,08E-26  |
| ERO1B    | -4,22286 | 4,38E-05  |
| L1CAM    | -4,22378 | 3,13E-37  |
| NUAK2    | -4,2269  | 3,07E-61  |
| STEAP1   | -4,23967 | 8,45E-17  |
| CPM      | -4,25133 | 3,48E-15  |
| ADRA2A   | -4,25863 | 5,06E-06  |
| ASPH     | -4,26162 | 1,34E-52  |
| COLEC11  | -4,26291 | 0,000217  |
| HLA-C    | -4,26559 | 1,55E-15  |
| MTAP     | -4,2717  | 8,80E-13  |
| TBXAS1   | -4,27478 | 3,93E-08  |



|            |          |          |
|------------|----------|----------|
| SERPING1   | -4,28084 | 1,67E-05 |
| C10orf54   | -4,28087 | 0,000279 |
| GPR3       | -4,28101 | 0,000967 |
| ADGRF4     | -4,28482 | 3,02E-13 |
| VAMP5      | -4,28985 | 5,95E-11 |
| TNFRSF11B  | -4,29417 | 2,49E-27 |
| HHEX       | -4,29537 | 6,92E-26 |
| FAM101B    | -4,3004  | 2,71E-51 |
| SIK1       | -4,31395 | 3,00E-06 |
| HIVEP3     | -4,31934 | 2,12E-12 |
| JAG1       | -4,32246 | 2,70E-73 |
| MDGA1      | -4,3305  | 7,89E-20 |
| P4HA3      | -4,3335  | 0,000773 |
| RASD2      | -4,34206 | 4,48E-18 |
| AFF3       | -4,34401 | 1,01E-43 |
| RASGEF1B   | -4,34818 | 1,08E-15 |
| SPTLC3     | -4,34862 | 2,73E-09 |
| SLC12A4    | -4,35097 | 1,62E-13 |
| MFGE8      | -4,35213 | 2,11E-69 |
| EPDR1      | -4,36043 | 9,89E-49 |
| UBASH3B    | -4,36718 | 1,65E-28 |
| AHNAK2     | -4,36908 | 3,27E-83 |
| TRIP10     | -4,37082 | 6,84E-44 |
| LGALS3     | -4,37709 | 8,02E-35 |
| C3orf52    | -4,37786 | 1,76E-08 |
| PBX4       | -4,37929 | 1,95E-25 |
| FAM20C     | -4,38347 | 4,25E-95 |
| B3GNT9     | -4,38534 | 1,62E-11 |
| ADAMTSL3   | -4,38861 | 7,27E-28 |
| DLGAP1-AS  | -4,38945 | 4,57E-16 |
| PXK        | -4,39073 | 7,13E-21 |
| RGAG1      | -4,39937 | 8,93E-09 |
| DMBX1      | -4,40311 | 6,28E-08 |
| BTN3A2     | -4,40724 | 1,09E-12 |
| SLC30A4    | -4,41739 | 1,53E-08 |
| HSPB6      | -4,41999 | 5,99E-08 |
| ZNF257     | -4,4204  | 2,83E-11 |
| LPXN       | -4,4213  | 2,08E-56 |
| SLC16A1-A' | -4,4333  | 1,91E-06 |
| CLCN4      | -4,43591 | 4,34E-27 |
| GNG4       | -4,44031 | 2,39E-25 |
| KIAA2022   | -4,45098 | 2,44E-07 |
| LRR8C      | -4,45219 | 2,75E-31 |
| ARHGAP23   | -4,45527 | 1,86E-21 |
| NAV2       | -4,45548 | 1,17E-78 |
| TMEM140    | -4,46493 | 8,06E-14 |
| HOXA7      | -4,46598 | 2,31E-09 |
| NOD2       | -4,46961 | 4,15E-11 |
| MGLL       | -4,47081 | 8,77E-28 |
| MAP1B      | -4,47226 | 3,63E-33 |

|           |          |           |
|-----------|----------|-----------|
| LINC00152 | -4,47282 | 1,53E-27  |
| CUBN      | -4,47489 | 8,97E-06  |
| B2M       | -4,47811 | 3,18E-44  |
| ISG15     | -4,48094 | 5,19E-05  |
| SIPA1     | -4,48323 | 3,88E-58  |
| RPS2P32   | -4,4871  | 3,48E-05  |
| SYNM      | -4,49129 | 2,56E-49  |
| PALM2     | -4,49296 | 3,89E-17  |
| DLK2      | -4,49974 | 8,32E-09  |
| FAM189A2  | -4,5014  | 6,65E-14  |
| NAP1L5    | -4,50286 | 0,000258  |
| FRMD5     | -4,50468 | 2,87E-50  |
| SEMA5B    | -4,50902 | 0,000949  |
| FNDCC4    | -4,51068 | 1,66E-10  |
| TLL2      | -4,51163 | 9,04E-19  |
| STARD9    | -4,52753 | 6,98E-17  |
| ARAP3     | -4,53007 | 1,89E-25  |
| RGS2      | -4,53276 | 4,96E-27  |
| ALDH1L2   | -4,54258 | 0,000864  |
| IFI6      | -4,54294 | 1,41E-05  |
| AKAP12    | -4,54535 | 2,38E-49  |
| IL10RA    | -4,5463  | 0,000382  |
| LOC440028 | -4,55184 | 0,000215  |
| EDIL3     | -4,56276 | 3,63E-12  |
| NCR3LG1   | -4,57213 | 2,95E-32  |
| RIN2      | -4,58192 | 3,09E-28  |
| MYO1E     | -4,58261 | 3,20E-37  |
| TIMP1     | -4,58479 | 1,11E-18  |
| EVC2      | -4,58687 | 7,11E-23  |
| SOX9      | -4,59726 | 1,54E-22  |
| EXT1      | -4,60437 | 4,32E-89  |
| PGF       | -4,60908 | 6,38E-11  |
| AOX1      | -4,63116 | 5,27E-08  |
| LIF       | -4,63719 | 5,95E-19  |
| LRRK1     | -4,6392  | 4,60E-37  |
| LIX1L     | -4,64081 | 7,47E-38  |
| PRKCA     | -4,65297 | 8,75E-49  |
| ABCB1     | -4,65831 | 7,38E-11  |
| MAP3K8    | -4,65962 | 2,45E-23  |
| CHST1     | -4,66203 | 2,51E-12  |
| TM4SF1    | -4,66965 | 4,29E-38  |
| CYP26B1   | -4,6753  | 2,75E-10  |
| ITGA3     | -4,67977 | 6,31E-139 |
| TAPBPL    | -4,68386 | 1,15E-18  |
| CNTNAP1   | -4,69867 | 1,86E-55  |
| DSEL      | -4,705   | 1,55E-22  |
| ZNF264    | -4,71778 | 9,74E-44  |
| CACNB4    | -4,73512 | 2,77E-08  |
| NUDT11    | -4,73645 | 7,37E-19  |
| ROR1      | -4,74582 | 4,81E-55  |

|           |          |           |
|-----------|----------|-----------|
| SERPINB9  | -4,74587 | 8,00E-35  |
| MRAS      | -4,75403 | 5,03E-63  |
| CD163L1   | -4,75412 | 3,28E-11  |
| SYNE1     | -4,75481 | 7,00E-23  |
| PLEKHF1   | -4,75519 | 2,03E-26  |
| XKR6      | -4,75697 | 4,50E-06  |
| FAT2      | -4,75804 | 0,000266  |
| PGBD5     | -4,75944 | 6,85E-60  |
| ULBP2     | -4,76375 | 5,61E-11  |
| TRIM47    | -4,78666 | 5,95E-56  |
| CHST3     | -4,78742 | 1,62E-16  |
| PTGS1     | -4,79839 | 1,22E-06  |
| EPHA2     | -4,80074 | 2,31E-41  |
| PPP4R4    | -4,81081 | 6,12E-09  |
| TMCC3     | -4,81427 | 6,93E-29  |
| TRPC1     | -4,82096 | 1,04E-34  |
| SMOX      | -4,82449 | 0,000123  |
| SQRDL     | -4,82973 | 6,62E-40  |
| CAV2      | -4,83502 | 5,21E-63  |
| SH2B3     | -4,83738 | 9,83E-90  |
| CFB       | -4,84075 | 9,27E-12  |
| ARMC4     | -4,84987 | 2,82E-09  |
| ECM1      | -4,85087 | 1,11E-14  |
| CD74      | -4,85108 | 4,65E-12  |
| MID1      | -4,85288 | 2,76E-21  |
| SPTBN5    | -4,85575 | 9,45E-10  |
| ZNF382    | -4,86884 | 5,61E-16  |
| PAK3      | -4,87323 | 8,67E-05  |
| SPRED1    | -4,87491 | 1,85E-32  |
| CREB5     | -4,88    | 0,000506  |
| RELB      | -4,88351 | 1,39E-42  |
| HERC5     | -4,88408 | 1,09E-09  |
| TUBB2A    | -4,91018 | 5,27E-33  |
| SPHK1     | -4,91308 | 2,96E-102 |
| ME3       | -4,91796 | 3,12E-11  |
| SNX7      | -4,92406 | 1,00E-52  |
| OAF       | -4,93579 | 1,36E-90  |
| DIRC3     | -4,95669 | 7,83E-07  |
| FAM46A    | -4,96007 | 7,95E-54  |
| CRIP1     | -4,96218 | 1,12E-35  |
| EMILIN2   | -4,96226 | 5,67E-21  |
| LINC00862 | -4,9625  | 1,45E-07  |
| PARP10    | -4,97862 | 9,88E-46  |
| GPR176    | -4,98754 | 9,91E-32  |
| OLFML2A   | -4,99539 | 2,34E-32  |
| S100A2    | -5,00645 | 5,90E-14  |
| CCDC80    | -5,01356 | 2,24E-26  |
| GFRA2     | -5,01896 | 4,30E-23  |
| SH2D5     | -5,02914 | 2,87E-45  |
| CNR1      | -5,02985 | 1,09E-16  |

|           |          |           |
|-----------|----------|-----------|
| SEPT10    | -5,0373  | 6,69E-36  |
| CD22      | -5,04261 | 0,000293  |
| FXVD5     | -5,06157 | 1,94E-96  |
| MBP       | -5,062   | 6,43E-59  |
| MN1       | -5,06762 | 1,57E-07  |
| CALD1     | -5,06879 | 9,76E-24  |
| ENPP1     | -5,0897  | 1,56E-28  |
| FAM149A   | -5,10117 | 2,36E-10  |
| LAMB3     | -5,10612 | 0,000573  |
| YOD1      | -5,11006 | 3,32E-22  |
| IL1R1     | -5,11752 | 5,97E-18  |
| CAV1      | -5,11891 | 2,41E-71  |
| GCNT2     | -5,12946 | 0,000835  |
| PLEK      | -5,13118 | 3,41E-08  |
| PROS1     | -5,13442 | 1,41E-17  |
| GULP1     | -5,14202 | 4,37E-61  |
| ETV4      | -5,15537 | 3,74E-13  |
| ANKRD29   | -5,15598 | 2,63E-18  |
| PLBD1-AS1 | -5,16359 | 0,000569  |
| ZNF702P   | -5,17291 | 5,58E-41  |
| IRAK2     | -5,1755  | 2,03E-06  |
| SYNC      | -5,18347 | 1,27E-44  |
| COPZ2     | -5,19287 | 2,11E-54  |
| CPED1     | -5,19554 | 1,92E-06  |
| IQCA1     | -5,19762 | 1,87E-05  |
| CPEB1     | -5,19802 | 1,05E-46  |
| HOXA-AS2  | -5,19862 | 1,01E-10  |
| BCAR3     | -5,20593 | 2,62E-118 |
| NOV       | -5,21107 | 0,000317  |
| TUBA4A    | -5,21356 | 1,69E-21  |
| KIF7      | -5,22834 | 0,000269  |
| IFI44L    | -5,23985 | 0,00012   |
| LGALS9    | -5,24126 | 2,06E-11  |
| PRUNE2    | -5,24301 | 4,69E-23  |
| CORO2B    | -5,24787 | 9,46E-13  |
| IL15RA    | -5,24801 | 8,11E-66  |
| CAPG      | -5,25327 | 1,95E-181 |
| MAP7D2    | -5,25728 | 5,15E-07  |
| ARHGEF6   | -5,26152 | 5,33E-57  |
| MMP24     | -5,26309 | 3,67E-30  |
| RTN4RL2   | -5,26339 | 4,89E-31  |
| QPCT      | -5,26371 | 6,89E-47  |
| ITGAM     | -5,26399 | 7,07E-05  |
| CMRK2     | -5,27252 | 1,00E-22  |
| KCNMA1    | -5,27324 | 5,41E-34  |
| PRRT3-AS1 | -5,27558 | 1,53E-05  |
| SOWAHC    | -5,28819 | 1,09E-60  |
| ETV7      | -5,29173 | 2,53E-12  |
| PPP1R1A   | -5,30395 | 2,36E-28  |
| CRYBG3    | -5,30956 | 1,69E-31  |

|          |          |           |
|----------|----------|-----------|
| DUSP6    | -5,3149  | 3,50E-10  |
| ZBTB18   | -5,33338 | 1,38E-17  |
| COL16A1  | -5,34473 | 3,43E-48  |
| TAGLN    | -5,35458 | 1,26E-51  |
| HLA-F    | -5,36138 | 1,64E-31  |
| GJB2     | -5,36227 | 1,36E-68  |
| HOXB4    | -5,37709 | 8,48E-06  |
| MICAL2   | -5,38548 | 4,01E-100 |
| C19orf66 | -5,3874  | 4,08E-29  |
| WIPF1    | -5,39381 | 8,45E-77  |
| EHD2     | -5,42174 | 2,80E-158 |
| COL27A1  | -5,42268 | 3,06E-41  |
| DNM3     | -5,4322  | 1,15E-12  |
| ZNF883   | -5,43657 | 0,000127  |
| HEG1     | -5,44047 | 0,000351  |
| FHAD1    | -5,44439 | 7,46E-12  |
| CDC42EP3 | -5,4455  | 5,86E-116 |
| ST3GAL2  | -5,45098 | 2,62E-58  |
| STX11    | -5,45381 | 2,96E-11  |
| PLEKHG4B | -5,45772 | 3,02E-32  |
| ARMCX4   | -5,468   | 3,16E-06  |
| MRC2     | -5,4686  | 2,96E-42  |
| TMEM52B  | -5,47684 | 1,21E-06  |
| SPX      | -5,5081  | 0,000311  |
| NOG      | -5,52022 | 9,42E-12  |
| LGI2     | -5,53814 | 1,05E-13  |
| UPP1     | -5,53824 | 9,97E-23  |
| SP100    | -5,54397 | 5,66E-05  |
| OAS2     | -5,54673 | 7,82E-06  |
| CD68     | -5,54854 | 3,50E-31  |
| TLR2     | -5,55723 | 1,30E-07  |
| EMP1     | -5,5581  | 0,000727  |
| MAGEB2   | -5,57337 | 1,92E-11  |
| NLRP3    | -5,57464 | 0,000715  |
| UGT2B4   | -5,57581 | 0,00065   |
| C10orf11 | -5,5786  | 1,64E-21  |
| MSRB3    | -5,58027 | 1,84E-83  |
| C8orf34  | -5,58088 | 1,18E-07  |
| PRR5L    | -5,5855  | 9,52E-70  |
| PTPN22   | -5,58756 | 2,61E-18  |
| PAG1     | -5,59953 | 1,20E-73  |
| C17orf51 | -5,60827 | 1,18E-45  |
| MARCH3   | -5,61592 | 4,44E-17  |
| AGPAT4   | -5,62437 | 3,24E-51  |
| TRPM8    | -5,62841 | 0,000902  |
| PTPRH    | -5,63415 | 5,45E-19  |
| C1QTNF2  | -5,64047 | 9,27E-12  |
| NPIPA5   | -5,6627  | 4,69E-08  |
| PLCE1    | -5,66815 | 8,22E-22  |
| PNMA2    | -5,70033 | 6,00E-22  |

|          |          |           |
|----------|----------|-----------|
| PRDM1    | -5,70066 | 0,000405  |
| GNG2     | -5,71999 | 6,57E-10  |
| SORCS2   | -5,7223  | 3,24E-47  |
| PLIN2    | -5,7225  | 2,43E-95  |
| EPB41L2  | -5,72558 | 7,04E-137 |
| SHC3     | -5,72774 | 5,99E-26  |
| OPTN     | -5,72967 | 9,31E-30  |
| EPHB1    | -5,73356 | 7,61E-56  |
| TRIM67   | -5,73502 | 5,49E-11  |
| CECR1    | -5,74456 | 1,11E-06  |
| MATN3    | -5,74675 | 1,08E-46  |
| TTLL6    | -5,7508  | 0,000306  |
| TMEM45A  | -5,76479 | 3,99E-27  |
| TRAF1    | -5,76594 | 1,66E-51  |
| SERPINE2 | -5,8139  | 1,21E-94  |
| HLA-A    | -5,81819 | 3,41E-114 |
| PLA2G16  | -5,82185 | 1,96E-75  |
| PIK3AP1  | -5,83349 | 1,36E-26  |
| KIFC3    | -5,84135 | 1,30E-27  |
| CASP10   | -5,84448 | 6,85E-20  |
| SLIT3    | -5,85343 | 6,89E-07  |
| SYN1     | -5,85809 | 9,05E-19  |
| HOXB8    | -5,85851 | 3,70E-07  |
| PAPSS2   | -5,86209 | 1,87E-06  |
| ZC3H12C  | -5,87206 | 9,00E-40  |
| CD109    | -5,87409 | 2,73E-88  |
| TRIM54   | -5,88403 | 8,76E-06  |
| ADAM8    | -5,89371 | 4,34E-56  |
| C2       | -5,90495 | 4,38E-64  |
| STAT5A   | -5,90738 | 2,83E-13  |
| C3orf80  | -5,91035 | 1,24E-22  |
| PTHLH    | -5,93282 | 1,94E-82  |
| HLA-DPA1 | -5,9514  | 8,25E-10  |
| POPDC3   | -5,95141 | 3,25E-19  |
| PQLC2L   | -5,96873 | 3,91E-43  |
| SLC2A3   | -5,9708  | 6,42E-23  |
| VIM-AS1  | -5,97382 | 1,92E-74  |
| LYN      | -5,97898 | 1,82E-51  |
| F3       | -5,98449 | 1,61E-80  |
| HOXA2    | -5,9853  | 1,05E-12  |
| OLFML2B  | -5,9868  | 3,25E-21  |
| RBMS3    | -5,99062 | 2,41E-20  |
| PMP22    | -5,99615 | 8,71E-56  |
| FBLN1    | -6,00005 | 1,47E-09  |
| ADAM19   | -6,00092 | 1,02E-125 |
| SH3PXD2A | -6,01954 | 4,55E-82  |
| DYSF     | -6,03617 | 4,29E-30  |
| APLN     | -6,03773 | 7,59E-20  |
| SLC22A15 | -6,04318 | 3,53E-42  |
| GBP4     | -6,04946 | 9,77E-05  |

|           |          |           |
|-----------|----------|-----------|
| MLLT11    | -6,05195 | 6,00E-69  |
| LCAT      | -6,05211 | 1,08E-11  |
| SH3RF3    | -6,05816 | 6,53E-15  |
| FHL1      | -6,06665 | 7,48E-75  |
| RSAD2     | -6,06678 | 0,000666  |
| LOC101928 | -6,07185 | 2,15E-11  |
| STEAP2    | -6,07734 | 8,62E-11  |
| GBP5      | -6,07879 | 1,00E-09  |
| KCNH1     | -6,07939 | 3,75E-14  |
| ZDHHC2    | -6,0978  | 4,44E-37  |
| PTPRB     | -6,11654 | 3,06E-22  |
| PYGL      | -6,11993 | 1,69E-06  |
| MFSD7     | -6,12009 | 1,95E-06  |
| IGFBP6    | -6,12066 | 1,73E-41  |
| SPRY4     | -6,12531 | 3,40E-57  |
| P2RX7     | -6,12727 | 5,80E-11  |
| ABLIM3    | -6,13277 | 9,02E-65  |
| BICC1     | -6,14401 | 7,89E-56  |
| ZNF415    | -6,15082 | 4,19E-12  |
| ZNF439    | -6,1773  | 2,47E-05  |
| MCAM      | -6,1818  | 1,04E-58  |
| EGFLAM    | -6,20155 | 1,99E-39  |
| MX2       | -6,20391 | 6,82E-67  |
| ZBTB20    | -6,20965 | 9,26E-17  |
| ADAMTS6   | -6,21347 | 2,02E-05  |
| RFTN1     | -6,21381 | 8,07E-82  |
| HAVCR2    | -6,2343  | 3,92E-07  |
| TNFAIP3   | -6,24248 | 1,05E-78  |
| PLAC8     | -6,2592  | 7,13E-11  |
| PRICKLE1  | -6,26015 | 2,85E-39  |
| DISP2     | -6,26021 | 1,47E-05  |
| SIRPB1    | -6,26053 | 3,23E-10  |
| DAB2      | -6,26706 | 3,52E-21  |
| CPA4      | -6,27064 | 3,33E-07  |
| CLDN1     | -6,27983 | 1,60E-06  |
| PIK3CD    | -6,28941 | 1,21E-52  |
| AEBP1     | -6,29959 | 3,23E-90  |
| C15orf52  | -6,30119 | 7,84E-12  |
| ARHGEF40  | -6,30797 | 9,54E-43  |
| XDH       | -6,31145 | 2,70E-12  |
| PLTP      | -6,31586 | 2,43E-74  |
| DAPK1     | -6,31966 | 1,47E-21  |
| CFH       | -6,32111 | 9,07E-06  |
| KIAA1462  | -6,3275  | 3,14E-56  |
| COL1A1    | -6,33679 | 7,29E-183 |
| GLIPR1    | -6,33733 | 2,42E-48  |
| ABHD8     | -6,34709 | 1,02E-40  |
| HCG4      | -6,35492 | 2,11E-15  |
| COL12A1   | -6,35543 | 2,04E-41  |
| GRASP     | -6,36542 | 6,81E-08  |

|           |          |           |
|-----------|----------|-----------|
| ITGB8     | -6,38821 | 8,13E-22  |
| BDNF      | -6,38939 | 8,11E-35  |
| ZNF469    | -6,3962  | 5,75E-44  |
| NPB       | -6,40113 | 5,63E-14  |
| MEFV      | -6,40123 | 1,35E-17  |
| CAPN2     | -6,4034  | 5,77E-52  |
| NCF2      | -6,41194 | 2,50E-05  |
| EGFR      | -6,42485 | 2,58E-141 |
| SLC6A17   | -6,42859 | 8,60E-06  |
| LINC01605 | -6,42865 | 4,46E-34  |
| TRIM22    | -6,4324  | 2,27E-26  |
| FBXO32    | -6,4377  | 7,65E-49  |
| VEGFC     | -6,4443  | 3,31E-48  |
| SLCO2A1   | -6,44609 | 2,90E-07  |
| MAFF      | -6,46658 | 6,92E-05  |
| ZNF528    | -6,49482 | 1,30E-21  |
| SELM      | -6,50593 | 7,75E-177 |
| LOC100133 | -6,53425 | 0,000723  |
| HAPLN3    | -6,53734 | 6,74E-14  |
| CGNL1     | -6,54739 | 3,79E-34  |
| SDPR      | -6,56507 | 4,31E-14  |
| TRABD2A   | -6,56901 | 3,86E-05  |
| JAZF1     | -6,56989 | 6,05E-42  |
| ABI3      | -6,59217 | 1,49E-06  |
| COL6A1    | -6,59629 | 6,18E-267 |
| BATF2     | -6,61076 | 1,00E-08  |
| PLEKHA4   | -6,62031 | 4,22E-48  |
| CA2       | -6,63891 | 3,11E-44  |
| FHOD3     | -6,65047 | 4,80E-34  |
| LOXL4     | -6,65369 | 2,63E-11  |
| IL12A     | -6,65553 | 3,67E-13  |
| TNIP3     | -6,66107 | 1,75E-06  |
| JPH2      | -6,67717 | 0,000437  |
| SLC16A2   | -6,67785 | 1,26E-71  |
| SIRPA     | -6,6889  | 1,69E-230 |
| MMP13     | -6,69342 | 3,69E-18  |
| BANK1     | -6,70332 | 0,000509  |
| GLI2      | -6,7039  | 3,51E-13  |
| ZNF788    | -6,7064  | 3,83E-09  |
| IFI27     | -6,71177 | 7,34E-10  |
| LOC101927 | -6,72252 | 0,000385  |
| TRIM9     | -6,72854 | 5,16E-29  |
| TNF       | -6,73672 | 3,04E-23  |
| CCDC144A  | -6,74747 | 0,000596  |
| PLAUR     | -6,75645 | 1,19E-49  |
| HS3ST1    | -6,75971 | 0,000324  |
| TMEM200E  | -6,77735 | 8,14E-17  |
| ZNF365    | -6,77996 | 9,74E-33  |
| VILL      | -6,78133 | 2,98E-09  |
| TBX15     | -6,78437 | 2,15E-27  |



|           |          |           |
|-----------|----------|-----------|
| PTGER1    | -6,78842 | 0,000409  |
| SLC15A3   | -6,79461 | 6,96E-08  |
| RASSF4    | -6,7978  | 1,73E-48  |
| HCP5      | -6,80553 | 6,59E-21  |
| BCL2A1    | -6,81447 | 5,46E-07  |
| HOXD1     | -6,82638 | 4,51E-09  |
| MCTP2     | -6,83554 | 1,95E-22  |
| GNB3      | -6,84384 | 5,79E-18  |
| GEM       | -6,84727 | 1,75E-112 |
| TRABD2B   | -6,8494  | 6,13E-06  |
| TSPAN2    | -6,88041 | 5,28E-32  |
| RAB32     | -6,88325 | 1,37E-83  |
| GPR146    | -6,88644 | 0,000246  |
| LINC00622 | -6,88892 | 4,62E-07  |
| PEG10     | -6,89564 | 1,80E-09  |
| SEC16B    | -6,90322 | 3,36E-10  |
| TCAF2     | -6,91996 | 7,95E-17  |
| FAM26F    | -6,92621 | 1,44E-07  |
| ROBO1     | -6,9349  | 1,58E-77  |
| DMGDH     | -6,95521 | 0,000193  |
| MIR614    | -6,95631 | 0,00015   |
| ETV5      | -6,96321 | 2,03E-78  |
| ACOT2     | -6,96516 | 1,77E-30  |
| ANTXR2    | -6,96778 | 1,58E-29  |
| PEAR1     | -6,98174 | 0,000146  |
| IL15      | -7,00768 | 8,46E-11  |
| SRSF12    | -7,02436 | 3,62E-13  |
| FHL2      | -7,0526  | 2,28E-38  |
| APOL3     | -7,07555 | 1,03E-13  |
| ZEB1      | -7,07702 | 8,17E-50  |
| ANGPTL4   | -7,09851 | 2,34E-51  |
| ILDR2     | -7,11246 | 2,23E-23  |
| MALL      | -7,13991 | 3,69E-19  |
| ANXA1     | -7,17067 | 1,43E-218 |
| FAM49A    | -7,19008 | 1,25E-51  |
| DKK3      | -7,19605 | 6,95E-95  |
| KIRREL3   | -7,19874 | 7,34E-05  |
| BST1      | -7,20463 | 6,75E-12  |
| PXDNL     | -7,22108 | 5,71E-05  |
| LOX       | -7,23882 | 6,81E-180 |
| LOC79160  | -7,24939 | 1,23E-08  |
| NLRC5     | -7,25047 | 2,32E-63  |
| CDKN1C    | -7,25959 | 3,88E-12  |
| STAT4     | -7,2652  | 1,01E-08  |
| SMO       | -7,2704  | 3,63E-12  |
| CRYM      | -7,2705  | 4,75E-05  |
| TYMP      | -7,27586 | 1,85E-158 |
| C1RL      | -7,28959 | 1,86E-15  |
| ZNF426    | -7,29667 | 2,07E-18  |
| DUSP10    | -7,32242 | 1,39E-89  |

|            |          |           |
|------------|----------|-----------|
| CABP4      | -7,32583 | 4,69E-05  |
| IGF2BP1    | -7,33034 | 6,45E-71  |
| INPP1      | -7,33212 | 1,33E-07  |
| SRPX       | -7,33267 | 4,43E-89  |
| RIN1       | -7,33391 | 1,82E-110 |
| CD6        | -7,3509  | 0,001     |
| SLC6A12    | -7,3595  | 0,00092   |
| MFNG       | -7,3595  | 0,00092   |
| CPA6       | -7,36622 | 1,83E-08  |
| FOXQ1      | -7,36803 | 5,24E-18  |
| IL2RG      | -7,37691 | 0,000867  |
| GPR85      | -7,38416 | 2,74E-05  |
| LINC00702  | -7,38885 | 0,001008  |
| LOC154761  | -7,39304 | 3,84E-05  |
| S100A3     | -7,39406 | 3,14E-05  |
| CLDN14     | -7,39418 | 0,000862  |
| BNC2       | -7,39715 | 4,21E-19  |
| NLRP1      | -7,39798 | 2,69E-05  |
| KCNQ3      | -7,39971 | 0,000787  |
| KIAA1755   | -7,42215 | 0,000715  |
| SYNPO      | -7,42417 | 9,78E-71  |
| ZNF717     | -7,42661 | 2,78E-09  |
| CNTN6      | -7,42765 | 0,000707  |
| CALCB      | -7,42813 | 2,68E-09  |
| BPIFC      | -7,43304 | 0,000748  |
| PILRA      | -7,43849 | 2,75E-05  |
| DUSP5P1    | -7,44155 | 0,00067   |
| PTN        | -7,44425 | 0,000654  |
| LOC101928  | -7,44425 | 0,000654  |
| SERPINE1   | -7,4517  | 7,73E-07  |
| MAF        | -7,45309 | 8,87E-97  |
| ITGA5      | -7,45464 | 3,87E-257 |
| RELN       | -7,45539 | 1,73E-22  |
| NEK9       | -7,4576  | 8,40E-06  |
| FAM26E     | -7,45807 | 0,00067   |
| SPON2      | -7,45823 | 1,11E-90  |
| UBQLNL     | -7,46335 | 0,000612  |
| AJAP1      | -7,46587 | 0,00033   |
| ACP5       | -7,46901 | 3,96E-07  |
| SLC16A12   | -7,47135 | 0,000602  |
| ITGA11     | -7,47397 | 0,000618  |
| HS1BP3-IT1 | -7,47397 | 0,000618  |
| PADI1      | -7,47654 | 0,000646  |
| SOGA3      | -7,47842 | 4,11E-20  |
| ZNF660     | -7,47905 | 0,000684  |
| ARHGAP22   | -7,48096 | 1,20E-34  |
| EVA1A      | -7,48506 | 6,09E-71  |
| THSD1      | -7,48958 | 0,000124  |
| PLSCR4     | -7,48962 | 3,11E-05  |
| MIR31HG    | -7,49781 | 0,000601  |

|            |          |           |
|------------|----------|-----------|
| ST3GAL6    | -7,50371 | 1,89E-05  |
| AFP        | -7,50495 | 0,000758  |
| CSF1       | -7,52177 | 2,21E-140 |
| TMEM255E   | -7,52763 | 9,47E-33  |
| FBXL21     | -7,52943 | 0,00046   |
| DPY19L2    | -7,5296  | 1,39E-13  |
| BIN1       | -7,53605 | 1,34E-112 |
| PLAG1      | -7,53709 | 1,78E-12  |
| INSC       | -7,53941 | 0,000521  |
| DGKG       | -7,54873 | 1,02E-09  |
| POSTN      | -7,54882 | 0,000692  |
| LINC01094  | -7,55549 | 0,000499  |
| INHBA-AS1  | -7,56027 | 0,000431  |
| LOXL2      | -7,56212 | 7,18E-17  |
| SPINK13    | -7,56273 | 0,00041   |
| ACSM5      | -7,56307 | 0,000958  |
| CTSS       | -7,56487 | 0,00012   |
| CP         | -7,56723 | 2,77E-45  |
| GPR132     | -7,57097 | 1,31E-05  |
| PHYHIP     | -7,57332 | 0,000491  |
| SPOCK1     | -7,58112 | 4,69E-132 |
| GNGT2      | -7,5821  | 0,000491  |
| AICDA      | -7,58525 | 0,000363  |
| PKLR       | -7,59318 | 0,00044   |
| COL5A1     | -7,59382 | 2,43E-95  |
| KRT222     | -7,605   | 0,000332  |
| TMEM173    | -7,60541 | 3,03E-05  |
| MYH13      | -7,60743 | 0,00033   |
| IGFBP7-AS1 | -7,61057 | 0,000435  |
| IL18R1     | -7,61357 | 1,10E-38  |
| LOC102477  | -7,6146  | 0,000353  |
| LINC01358  | -7,61504 | 0,000364  |
| SYTL3      | -7,61782 | 1,95E-105 |
| SPOCD1     | -7,61906 | 2,22E-06  |
| CARD16     | -7,62132 | 0,000433  |
| SYT11      | -7,62261 | 1,76E-24  |
| HRASLS     | -7,62343 | 0,000476  |
| LOC39971E  | -7,62779 | 0,000433  |
| LINC01583  | -7,63394 | 0,000329  |
| FBXL7      | -7,63394 | 0,000329  |
| IGFBP3     | -7,63682 | 2,15E-48  |
| COL7A1     | -7,63824 | 1,27E-116 |
| LOC40094C  | -7,63917 | 0,000664  |
| ACOT1      | -7,65467 | 9,53E-06  |
| IL36G      | -7,65803 | 0,000269  |
| MPP1       | -7,66402 | 3,42E-70  |
| ENG        | -7,6656  | 4,73E-111 |
| CDH16      | -7,66963 | 0,000273  |
| COL8A1     | -7,67167 | 3,46E-10  |
| TP73-AS1   | -7,67259 | 0,000364  |

|           |          |           |
|-----------|----------|-----------|
| MESP2     | -7,67453 | 0,000256  |
| TFCP2     | -7,68298 | 0,000358  |
| PIK3R6    | -7,68374 | 0,00024   |
| NFE4      | -7,68601 | 0,000246  |
| ARPP21    | -7,68825 | 0,000254  |
| TLL1      | -7,68825 | 0,000254  |
| ITGAX     | -7,6931  | 0,000234  |
| ROR2      | -7,71778 | 9,31E-38  |
| UCA1      | -7,72513 | 1,31E-18  |
| ITGBL1    | -7,73097 | 0,000275  |
| SLC4A4    | -7,7339  | 1,01E-21  |
| CCL26     | -7,73686 | 0,00025   |
| CDH4      | -7,73827 | 0,000436  |
| ARL10     | -7,74407 | 5,67E-06  |
| MAEL      | -7,74524 | 0,000186  |
| FAM212A   | -7,74548 | 0,000424  |
| CA9       | -7,74589 | 4,29E-18  |
| C1QL1     | -7,75434 | 2,10E-172 |
| NOX4      | -7,77003 | 0,000304  |
| SLC26A7   | -7,77306 | 0,000829  |
| TTC22     | -7,77374 | 0,000166  |
| DPYSL3    | -7,77501 | 4,97E-167 |
| TM6SF2    | -7,78187 | 0,000212  |
| ADAMTS14  | -7,78354 | 7,60E-26  |
| LOC10106C | -7,7847  | 0,000149  |
| LINC01138 | -7,78854 | 1,27E-10  |
| KRT75     | -7,79144 | 0,000168  |
| HOXB3     | -7,79369 | 4,80E-15  |
| LIPG      | -7,79631 | 0,000826  |
| ANO3      | -7,79767 | 0,000143  |
| LOC100131 | -7,80093 | 0,00022   |
| F2        | -7,80272 | 0,000244  |
| TRIM38    | -7,81618 | 0,000186  |
| MMP7      | -7,81684 | 0,000129  |
| PLB1      | -7,82547 | 0,000139  |
| TSHZ2     | -7,82749 | 0,000131  |
| PCDH20    | -7,82954 | 0,000125  |
| LAMC2     | -7,83604 | 2,10E-172 |
| CYS1      | -7,83721 | 3,99E-06  |
| CCIN      | -7,84188 | 0,000127  |
| COL6A2    | -7,84663 | 1,69E-230 |
| LINC01160 | -7,87854 | 0,000127  |
| ERAP2     | -7,87878 | 3,02E-74  |
| NR1H4     | -7,88035 | 0,000138  |
| LINC00857 | -7,88189 | 6,91E-11  |
| IGFBP1    | -7,9031  | 9,10E-05  |
| CD300LB   | -7,90531 | 9,38E-05  |
| ZNF69     | -7,90877 | 0,000106  |
| TNFAIP2   | -7,91088 | 1,51E-69  |
| ENPP2     | -7,91188 | 9,22E-24  |

|           |          |           |
|-----------|----------|-----------|
| PSMB9     | -7,91417 | 2,74E-106 |
| XAF1      | -7,91851 | 8,27E-07  |
| PSORS1C3  | -7,92114 | 8,58E-05  |
| SFTA1P    | -7,92273 | 9,35E-05  |
| C1R       | -7,92996 | 4,38E-142 |
| CDH13     | -7,93082 | 7,61E-05  |
| ST6GAL2   | -7,9322  | 2,17E-27  |
| KCTD16    | -7,94508 | 9,73E-05  |
| NDUFA4L2  | -7,95081 | 4,10E-128 |
| ZNF521    | -7,95733 | 5,86E-20  |
| GRPR      | -7,95896 | 0,000106  |
| PAX8      | -7,97394 | 8,69E-120 |
| RGS4      | -7,97417 | 0,000101  |
| NTNG1     | -7,98784 | 1,12E-20  |
| ANKRD30B  | -7,9884  | 5,71E-05  |
| TAGLN3    | -7,98902 | 7,96E-05  |
| RFX8      | -7,99575 | 6,24E-05  |
| SLC17A9   | -7,99667 | 1,56E-91  |
| MME       | -7,99893 | 2,49E-06  |
| LOC101928 | -8,0007  | 8,93E-05  |
| ADAD2     | -8,00184 | 1,87E-06  |
| ZNF625-ZN | -8,01062 | 5,88E-05  |
| HOXD11    | -8,026   | 1,30E-39  |
| PPP1R3G   | -8,03438 | 1,57E-06  |
| TMBIM1    | -8,03608 | 2,06E-67  |
| LOC101448 | -8,03643 | 4,80E-05  |
| PID1      | -8,03788 | 8,74E-17  |
| HLA-B     | -8,04375 | 1,46E-73  |
| LOC100289 | -8,04377 | 4,36E-05  |
| LOC102723 | -8,04455 | 6,57E-05  |
| BIRC3     | -8,0554  | 4,51E-54  |
| RNF217    | -8,05782 | 7,40E-16  |
| DNER      | -8,06751 | 3,49E-16  |
| SLC2A9    | -8,0794  | 4,01E-05  |
| ACSL5     | -8,07959 | 1,11E-61  |
| FOSL1     | -8,08288 | 5,74E-99  |
| ACTBL2    | -8,08435 | 4,76E-05  |
| SLC22A3   | -8,08435 | 4,76E-05  |
| APOBEC3C  | -8,08582 | 2,35E-36  |
| IL12RB1   | -8,09004 | 3,56E-05  |
| LINC00524 | -8,0901  | 0,000127  |
| BAIAP2L2  | -8,09089 | 9,04E-27  |
| HDAC9     | -8,10938 | 1,69E-40  |
| HOXB5     | -8,12408 | 5,03E-05  |
| HS3ST3A1  | -8,14046 | 8,46E-55  |
| ALDH2     | -8,14741 | 4,77E-82  |
| SAMD9L    | -8,14743 | 0,00025   |
| FBN1      | -8,14796 | 5,69E-161 |
| ABCC9     | -8,15428 | 1,40E-10  |
| GAPLINC   | -8,15433 | 4,06E-05  |

|            |          |           |
|------------|----------|-----------|
| KCNJ15     | -8,15847 | 2,64E-05  |
| ANKRD33B   | -8,15963 | 2,72E-58  |
| IFFO1      | -8,1642  | 3,31E-17  |
| PPP1R14C   | -8,17142 | 1,14E-22  |
| TMEM200C   | -8,17492 | 2,73E-05  |
| FAM71E1    | -8,17682 | 2,25E-05  |
| LINC01444  | -8,17901 | 3,10E-05  |
| DAW1       | -8,18201 | 2,63E-05  |
| C10orf90   | -8,18381 | 2,08E-06  |
| SCG2       | -8,18652 | 2,46E-05  |
| PTGS2      | -8,20156 | 5,19E-22  |
| HAS2       | -8,22263 | 4,35E-24  |
| LYNX1      | -8,22396 | 1,85E-05  |
| COL6A3     | -8,22409 | 6,06E-41  |
| FZD8       | -8,23455 | 8,33E-94  |
| CD177      | -8,23667 | 1,72E-05  |
| FAM27B     | -8,23667 | 1,72E-05  |
| RTL1       | -8,24043 | 2,38E-05  |
| RAB7B      | -8,24551 | 7,51E-07  |
| SLC7A7     | -8,24555 | 1,15E-17  |
| CH25H      | -8,26794 | 1,43E-05  |
| COL4A2-AS  | -8,27217 | 3,45E-05  |
| ARSJ       | -8,27544 | 8,76E-18  |
| CHRNA1     | -8,28469 | 2,51E-05  |
| C8orf34-AS | -8,28495 | 1,34E-05  |
| VSIG1      | -8,30316 | 1,19E-05  |
| FAM150B    | -8,31072 | 1,14E-05  |
| NRP2       | -8,31153 | 1,28E-122 |
| PTGFR      | -8,31614 | 4,13E-17  |
| TM4SF19    | -8,33818 | 1,62E-05  |
| GALNT5     | -8,34187 | 1,06E-05  |
| LOC101928  | -8,34602 | 1,24E-05  |
| ZKSCAN7    | -8,35092 | 1,05E-05  |
| BCHE       | -8,37421 | 1,58E-05  |
| MARCO      | -8,37537 | 1,75E-05  |
| MMP10      | -8,38073 | 1,08E-05  |
| TGFB111    | -8,38377 | 6,77E-09  |
| TRIM55     | -8,39356 | 2,84E-07  |
| TRPC4      | -8,39809 | 1,40E-05  |
| APOL6      | -8,40295 | 5,70E-106 |
| DMBT1      | -8,41542 | 8,12E-06  |
| MAP1LC3A   | -8,42077 | 6,59E-06  |
| C2orf88    | -8,42204 | 2,48E-07  |
| GGT8P      | -8,43263 | 9,65E-06  |
| TENM2      | -8,43743 | 0,000655  |
| SNPH       | -8,43907 | 1,84E-18  |
| SCG5       | -8,43995 | 2,53E-07  |
| LOC11511C  | -8,45102 | 5,84E-06  |
| SRGN       | -8,45177 | 5,25E-07  |
| DRGX       | -8,45814 | 6,43E-06  |

|           |          |           |
|-----------|----------|-----------|
| USP32P1   | -8,47445 | 4,98E-07  |
| GRIA3     | -8,50201 | 4,34E-06  |
| MX1       | -8,5024  | 2,88E-107 |
| ZNF844    | -8,51774 | 1,57E-07  |
| TNFSF12   | -8,52036 | 3,81E-06  |
| C11orf45  | -8,52165 | 3,86E-06  |
| ICAM2     | -8,52249 | 2,59E-07  |
| ICAM1     | -8,53645 | 9,91E-97  |
| ZNF559    | -8,53648 | 5,16E-06  |
| LOC100507 | -8,53847 | 3,42E-06  |
| C22orf34  | -8,53878 | 4,39E-06  |
| SERP2     | -8,54365 | 3,52E-06  |
| PHLDB2    | -8,54761 | 8,96E-41  |
| C10orf67  | -8,55887 | 3,07E-06  |
| GABRE     | -8,56073 | 4,80E-06  |
| SOX2-OT   | -8,56327 | 1,95E-07  |
| OSR1      | -8,57743 | 1,18E-07  |
| GLIS3     | -8,58328 | 2,24E-06  |
| CD274     | -8,58397 | 5,26E-26  |
| UCHL1     | -8,5876  | 1,68E-17  |
| B3GALT1   | -8,59884 | 2,50E-06  |
| ENPP3     | -8,60434 | 3,57E-06  |
| LINC00899 | -8,60815 | 3,46E-06  |
| SGK2      | -8,61127 | 4,39E-06  |
| AMPH      | -8,61149 | 1,46E-07  |
| TLR6      | -8,61409 | 3,31E-06  |
| SRPX2     | -8,61569 | 2,93E-06  |
| GBP3      | -8,61739 | 9,90E-08  |
| CD69      | -8,62823 | 2,37E-06  |
| NPFFR2    | -8,63057 | 2,18E-06  |
| LINC01111 | -8,64455 | 2,62E-06  |
| ARHGAP25  | -8,65811 | 3,42E-06  |
| OSBPL3    | -8,66993 | 1,74E-70  |
| APOL1     | -8,67175 | 1,20E-09  |
| ADM       | -8,68636 | 5,87E-107 |
| SCN9A     | -8,69062 | 3,65E-14  |
| CTHRC1    | -8,69691 | 2,06E-142 |
| PSG5      | -8,71415 | 1,90E-06  |
| SIGLEC15  | -8,72163 | 1,31E-06  |
| NTRK3     | -8,72736 | 1,38E-06  |
| LOC101928 | -8,75049 | 1,36E-06  |
| LINC01436 | -8,7598  | 1,27E-06  |
| CLDN11    | -8,76781 | 6,60E-08  |
| ZBED2     | -8,77936 | 1,02E-06  |
| DNAH12    | -8,78255 | 9,24E-07  |
| BMPER     | -8,78255 | 9,24E-07  |
| KLRC1     | -8,78447 | 1,12E-06  |
| IL36B     | -8,78578 | 8,98E-07  |
| KRT34     | -8,78833 | 1,44E-06  |
| ZNF385D   | -8,80114 | 1,05E-06  |

|           |          |           |
|-----------|----------|-----------|
| PINLYP    | -8,80633 | 1,46E-06  |
| FSTL1     | -8,81057 | 4,09E-97  |
| ABI3BP    | -8,81114 | 1,07E-06  |
| PTPRD-AS1 | -8,8179  | 7,51E-07  |
| LOC100506 | -8,82398 | 1,00E-14  |
| CCL20     | -8,82739 | 7,17E-07  |
| ITK       | -8,83894 | 6,92E-07  |
| ASB2      | -8,84202 | 3,11E-21  |
| C14orf105 | -8,84916 | 7,42E-07  |
| HOXA9     | -8,8506  | 1,67E-06  |
| OLAH      | -8,87513 | 6,42E-07  |
| DEPDC7    | -8,89085 | 6,59E-07  |
| GSTM1     | -8,89231 | 4,44E-15  |
| HECW1     | -8,89618 | 4,88E-07  |
| NUDT16P1  | -8,90727 | 5,12E-07  |
| FAM43B    | -8,92693 | 4,12E-07  |
| AQP9      | -8,92774 | 4,85E-07  |
| LINC01224 | -8,93275 | 4,24E-07  |
| ZNF625    | -8,93379 | 4,00E-07  |
| C15orf48  | -8,93396 | 5,32E-08  |
| GJC1      | -8,9419  | 2,88E-27  |
| FSD2      | -8,95609 | 3,54E-07  |
| ADAMTS2   | -8,96023 | 2,84E-15  |
| GPR1      | -8,96944 | 3,39E-07  |
| RRN3P1    | -8,97135 | 6,04E-07  |
| NEXN      | -8,97437 | 4,89E-22  |
| FAM27E3   | -9,00562 | 4,01E-07  |
| PPP1R3C   | -9,01163 | 2,64E-15  |
| CLIP4     | -9,01169 | 5,09E-36  |
| RTP4      | -9,02221 | 3,20E-07  |
| PAPPA2    | -9,02501 | 1,34E-08  |
| CDH2      | -9,04026 | 1,31E-111 |
| PRDM8     | -9,05923 | 2,30E-07  |
| GIPC2     | -9,06311 | 2,75E-07  |
| SPRR2D    | -9,06923 | 2,80E-07  |
| BRINP1    | -9,07128 | 9,29E-16  |
| DOCK2     | -9,07582 | 1,23E-22  |
| NEFM      | -9,07682 | 1,88E-07  |
| KHDRBS3   | -9,07721 | 1,12E-07  |
| HABP2     | -9,08301 | 1,79E-07  |
| CR1L      | -9,08569 | 1,68E-07  |
| LINC01411 | -9,08925 | 1,75E-07  |
| PHACTR1   | -9,09051 | 8,04E-16  |
| ECM2      | -9,1032  | 1,59E-07  |
| LOC541472 | -9,11338 | 1,71E-07  |
| KLHDC7A   | -9,11679 | 5,49E-16  |
| LZTS1     | -9,1324  | 1,30E-07  |
| LBH       | -9,1356  | 5,51E-16  |
| S1PR1     | -9,16268 | 1,14E-07  |
| LRRC15    | -9,18874 | 1,31E-07  |



|           |          |           |
|-----------|----------|-----------|
| PSG1      | -9,192   | 1,98E-07  |
| IL7       | -9,19322 | 9,26E-08  |
| CARD6     | -9,19489 | 9,33E-08  |
| PRKCQ-AS1 | -9,1998  | 9,43E-08  |
| CLMP      | -9,20236 | 2,74E-30  |
| MYO7B     | -9,2078  | 8,92E-08  |
| FOX L1    | -9,20873 | 1,40E-07  |
| LOC72997C | -9,21273 | 8,65E-08  |
| SKAP1     | -9,22086 | 1,26E-07  |
| ZNF71     | -9,23207 | 1,95E-16  |
| FGF2      | -9,23322 | 9,41E-31  |
| LUM       | -9,23467 | 1,04E-15  |
| ZMIZ1-AS1 | -9,24294 | 6,96E-08  |
| PDE10A    | -9,26493 | 1,50E-08  |
| MSR1      | -9,27723 | 5,65E-08  |
| ACTN2     | -9,27738 | 6,55E-08  |
| EPAS1     | -9,28374 | 5,62E-181 |
| SLFN13    | -9,28715 | 5,68E-08  |
| NID1      | -9,29614 | 6,23E-08  |
| SLAMF7    | -9,30322 | 5,16E-08  |
| GAL3ST1   | -9,33549 | 4,75E-08  |
| LINC01320 | -9,33556 | 7,60E-08  |
| IL34      | -9,33753 | 4,06E-08  |
| HLA-H     | -9,35696 | 8,69E-17  |
| C10orf10  | -9,37166 | 5,78E-17  |
| MUC12     | -9,37258 | 3,39E-08  |
| TIMP4     | -9,39717 | 2,06E-09  |
| CXCL3     | -9,40901 | 6,71E-09  |
| NACAD     | -9,42116 | 3,19E-08  |
| GBP1P1    | -9,42278 | 2,61E-08  |
| DKFZp434J | -9,42354 | 2,47E-08  |
| IL1A      | -9,43289 | 3,09E-08  |
| ATP6V0D2  | -9,43667 | 2,30E-08  |
| ZNF501    | -9,4442  | 2,31E-08  |
| ADCY8     | -9,44617 | 2,48E-08  |
| SP140     | -9,45109 | 2,10E-08  |
| LINC00958 | -9,46926 | 1,67E-32  |
| LONRF3    | -9,47076 | 1,89E-17  |
| TNFSF14   | -9,47481 | 1,89E-08  |
| GCNT4     | -9,47481 | 1,89E-08  |
| ASB5      | -9,48638 | 2,11E-08  |
| LHFP      | -9,48759 | 3,30E-61  |
| HLA-G     | -9,50453 | 2,26E-08  |
| C3        | -9,50736 | 1,11E-87  |
| BATF3     | -9,51196 | 1,32E-09  |
| SERPINB4  | -9,51271 | 1,72E-08  |
| IL32      | -9,51626 | 1,93E-16  |
| ITPRIPL1  | -9,5182  | 1,42E-09  |
| GDF6      | -9,51884 | 1,30E-09  |
| HLA-DPB1  | -9,53463 | 1,10E-17  |

|           |          |           |
|-----------|----------|-----------|
| ZC3HAV1L  | -9,55093 | 1,56E-08  |
| MT1G      | -9,56075 | 1,15E-08  |
| PNMAL1    | -9,56105 | 1,50E-08  |
| TSLP      | -9,56835 | 1,07E-08  |
| CATSPER1  | -9,57899 | 1,01E-08  |
| KY        | -9,58091 | 1,10E-09  |
| WFDC21P   | -9,58325 | 5,58E-18  |
| LINC00900 | -9,58719 | 1,56E-08  |
| UCN2      | -9,58807 | 7,91E-10  |
| CASP1     | -9,58895 | 9,57E-09  |
| APOBEC3D  | -9,59517 | 9,26E-09  |
| LOC283683 | -9,60145 | 9,96E-09  |
| ARHGAP6   | -9,61118 | 1,32E-08  |
| CXCL6     | -9,61182 | 9,00E-09  |
| SSC5D     | -9,62852 | 1,32E-55  |
| CNN1      | -9,6312  | 7,86E-09  |
| KCNIP1    | -9,64255 | 7,00E-09  |
| TMEM47    | -9,65611 | 8,62E-18  |
| GALNT9    | -9,6715  | 9,13E-09  |
| ZNF665    | -9,67497 | 6,11E-09  |
| CCBE1     | -9,67681 | 9,62E-10  |
| TNFRSF14  | -9,68371 | 3,68E-18  |
| ADGRE1    | -9,69051 | 9,00E-09  |
| CYP7B1    | -9,69362 | 5,18E-09  |
| TFPI2     | -9,69891 | 2,56E-08  |
| IL31RA    | -9,70642 | 5,55E-09  |
| IL6       | -9,72794 | 4,91E-93  |
| GATA2-AS1 | -9,73578 | 3,98E-10  |
| CYB5R2    | -9,754   | 3,83E-09  |
| TLR3      | -9,75424 | 5,96E-09  |
| TPM2      | -9,81023 | 1,38E-197 |
| C1RL-AS1  | -9,82789 | 4,48E-09  |
| MIOX      | -9,83678 | 2,32E-09  |
| GPC6      | -9,8413  | 3,73E-27  |
| LOC554223 | -9,84343 | 2,49E-09  |
| PAQR9     | -9,85094 | 2,21E-09  |
| LINC00520 | -9,856   | 2,03E-09  |
| LTK       | -9,89294 | 2,70E-10  |
| SUN3      | -9,89818 | 1,57E-09  |
| MDFIC     | -9,90491 | 1,51E-27  |
| ITGA1     | -9,90915 | 1,50E-10  |
| MIR155HG  | -9,92744 | 1,33E-09  |
| TKTL1     | -9,92985 | 1,32E-09  |
| ZNF215    | -9,94842 | 1,22E-09  |
| ZNF528-AS | -9,95847 | 1,53E-09  |
| HOXD3     | -9,96653 | 1,55E-09  |
| SULT1C2   | -9,97327 | 1,40E-09  |
| HACD4     | -9,97922 | 1,55E-09  |
| ARHGAP28  | -9,98121 | 1,07E-09  |
| PTPRR     | -9,98295 | 1,10E-09  |

|                       |          |           |
|-----------------------|----------|-----------|
| HLX                   | -10,0079 | 1,06E-19  |
| IL4I1                 | -10,0141 | 6,20E-07  |
| SLC43A3               | -10,0206 | 2,56E-05  |
| SPAG16                | -10,031  | 9,76E-10  |
| PTX3                  | -10,0337 | 2,49E-08  |
| CARD11                | -10,038  | 1,40E-09  |
| KCNE4                 | -10,0492 | 6,50E-10  |
| PSG4                  | -10,057  | 9,67E-10  |
| ZNF502                | -10,0587 | 2,44E-09  |
| C8orf31               | -10,0729 | 7,60E-10  |
| LIMS2                 | -10,0812 | 4,34E-38  |
| CREB3L1               | -10,0874 | 9,89E-126 |
| TNFSF15               | -10,0892 | 5,14E-10  |
| C1QTNF1               | -10,1053 | 1,78E-08  |
| PRKCQ                 | -10,1062 | 4,65E-10  |
| ZNF826P               | -10,1151 | 5,13E-10  |
| APCDD1L- <del>A</del> | -10,1203 | 3,20E-20  |
| KCNS1                 | -10,1464 | 3,67E-10  |
| EDNRA                 | -10,169  | 3,23E-10  |
| LINC00460             | -10,1702 | 3,22E-10  |
| ZNF280B               | -10,1715 | 6,65E-10  |
| KMO                   | -10,1769 | 3,15E-10  |
| CGB8                  | -10,177  | 3,52E-10  |
| GLT8D2                | -10,1847 | 3,67E-10  |
| DOK6                  | -10,1955 | 3,33E-10  |
| TGFBI                 | -10,2152 | 1,66E-99  |
| VCAN                  | -10,2231 | 7,96E-154 |
| TMEM220               | -10,2282 | 2,36E-10  |
| EBF1                  | -10,2351 | 2,80E-10  |
| HOXD10                | -10,2404 | 1,52E-20  |
| GBP1                  | -10,2409 | 1,19E-16  |
| BDKRB1                | -10,2418 | 2,19E-10  |
| HOXD4                 | -10,2606 | 1,90E-10  |
| CD209                 | -10,2748 | 1,86E-10  |
| ZNF470                | -10,2838 | 1,71E-10  |
| GRIN2A                | -10,2885 | 1,75E-10  |
| LINC01426             | -10,2885 | 1,75E-10  |
| ZNF280A               | -10,2899 | 2,55E-10  |
| ADAMTS5               | -10,2999 | 1,67E-10  |
| TNFRSF10C             | -10,3013 | 1,48E-10  |
| SYT13                 | -10,3019 | 7,63E-15  |
| KANK4                 | -10,3133 | 1,67E-10  |
| CA13                  | -10,3146 | 1,59E-10  |
| ALOX5                 | -10,3227 | 1,79E-11  |
| POU5F1                | -10,3355 | 1,31E-10  |
| ADAMTS16              | -10,3635 | 1,06E-10  |
| SLAMF8                | -10,3637 | 1,11E-10  |
| MEOX2                 | -10,3798 | 9,44E-11  |
| SPNS3                 | -10,3875 | 1,03E-10  |
| ARSE                  | -10,3911 | 8,96E-11  |

|          |          |           |
|----------|----------|-----------|
| NTF3     | -10,393  | 8,84E-11  |
| HAS2-AS1 | -10,394  | 1,29E-10  |
| PDCD1LG2 | -10,4014 | 8,31E-11  |
| AGPS     | -10,4021 | 4,45E-68  |
| TLR4     | -10,4043 | 8,21E-11  |
| TDRP     | -10,4044 | 1,57E-10  |
| SEC14L6  | -10,4099 | 7,92E-11  |
| GDNF     | -10,4103 | 7,86E-11  |
| SDHAF3   | -10,4314 | 9,56E-11  |
| UBA7     | -10,452  | 6,59E-11  |
| TDRD9    | -10,4738 | 8,62E-12  |
| MT1L     | -10,4751 | 6,42E-11  |
| MMP14    | -10,5038 | 1,90E-05  |
| IL7R     | -10,521  | 9,10E-11  |
| ZNF334   | -10,5317 | 3,82E-11  |
| PPARGC1A | -10,5532 | 4,07E-11  |
| SERPINB3 | -10,5615 | 3,26E-11  |
| DENND2A  | -10,5678 | 3,60E-11  |
| KCP      | -10,5827 | 3,32E-11  |
| IPW      | -10,6055 | 3,19E-11  |
| EMP3     | -10,6067 | 4,77E-111 |
| LRRC34   | -10,6093 | 2,40E-11  |
| DMD      | -10,6214 | 2,24E-11  |
| HOXD-AS2 | -10,6372 | 2,39E-11  |
| SLCO2B1  | -10,6412 | 2,11E-11  |
| GLIS1    | -10,644  | 2,31E-11  |
| TLE4     | -10,6626 | 2,83E-12  |
| RARRES1  | -10,6767 | 2,15E-11  |
| C1S      | -10,6989 | 3,65E-87  |
| APOBEC3G | -10,7152 | 1,65E-11  |
| FGF5     | -10,7213 | 1,63E-11  |
| MSN      | -10,7261 | 1,62E-10  |
| NCAM1    | -10,7301 | 4,74E-71  |
| ZNF90    | -10,7445 | 1,11E-11  |
| GNE      | -10,7755 | 9,68E-12  |
| DPYD     | -10,7774 | 8,87E-12  |
| ROBO4    | -10,7797 | 1,87E-11  |
| NTM      | -10,7891 | 9,45E-12  |
| C3AR1    | -10,8021 | 8,00E-12  |
| ZFP82    | -10,8237 | 7,44E-12  |
| RAB33A   | -10,8389 | 6,77E-12  |
| CCNYL2   | -10,8847 | 5,52E-12  |
| CLEC2B   | -10,8919 | 4,45E-12  |
| C1orf186 | -10,9004 | 4,25E-12  |
| FABP3    | -10,9012 | 4,23E-12  |
| CSF2     | -10,926  | 3,98E-12  |
| LY96     | -10,9265 | 6,12E-12  |
| SERPINB7 | -10,9401 | 5,35E-12  |
| EBI3     | -10,9431 | 3,61E-12  |
| NGF      | -10,9494 | 3,56E-12  |

|           |          |           |
|-----------|----------|-----------|
| HOXA10-A  | -10,9594 | 3,02E-12  |
| HOXD13    | -10,981  | 2,70E-12  |
| P3H3      | -10,9982 | 2,40E-12  |
| KL        | -11,0334 | 9,06E-24  |
| MXRA5     | -11,0383 | 7,11E-09  |
| ADAMTS3   | -11,0572 | 2,18E-12  |
| PLA1A     | -11,0711 | 1,54E-12  |
| SLC35F3   | -11,0757 | 1,57E-12  |
| PTGIS     | -11,0815 | 2,91E-12  |
| TSPAN18   | -11,0863 | 3,37E-13  |
| MAMDC2    | -11,1102 | 1,24E-12  |
| CDH11     | -11,1139 | 1,21E-12  |
| ZFPM2-AS1 | -11,1205 | 1,18E-12  |
| FBLN7     | -11,1312 | 1,77E-12  |
| CCL28     | -11,1365 | 1,04E-12  |
| NPR2      | -11,1387 | 2,16E-13  |
| MYOM3     | -11,1409 | 1,07E-12  |
| AIM2      | -11,161  | 9,28E-13  |
| CXCL1     | -11,1668 | 8,76E-13  |
| NRN1      | -11,2129 | 8,65E-13  |
| COL4A2    | -11,2133 | 5,60E-144 |
| RAB42     | -11,2237 | 7,09E-13  |
| LINC00941 | -11,2272 | 6,15E-13  |
| ADAM12    | -11,2464 | 7,59E-70  |
| LINC00944 | -11,2555 | 5,11E-13  |
| TNFSF10   | -11,2596 | 1,63E-13  |
| CXCL2     | -11,269  | 5,01E-13  |
| C7orf31   | -11,2722 | 5,31E-13  |
| ANKRD1    | -11,289  | 9,39E-14  |
| PKIA      | -11,2906 | 4,20E-13  |
| TINAGL1   | -11,2909 | 4,51E-13  |
| ZNF518B   | -11,3181 | 4,47E-13  |
| BHLHE41   | -11,3221 | 7,41E-14  |
| CYBRD1    | -11,3236 | 3,88E-13  |
| ZNF626    | -11,3271 | 4,07E-13  |
| PAPPA     | -11,3358 | 3,41E-13  |
| MMP3      | -11,3363 | 3,26E-13  |
| RGS20     | -11,3378 | 3,32E-13  |
| ZNF175    | -11,3405 | 3,59E-13  |
| IL1RL2    | -11,3545 | 2,90E-13  |
| MT1A      | -11,3556 | 4,58E-13  |
| ARHGAP31  | -11,3585 | 5,88E-14  |
| LOC613266 | -11,3618 | 2,89E-13  |
| HRH1      | -11,3675 | 3,02E-13  |
| C2CD2     | -11,386  | 2,35E-13  |
| PDZK1IP1  | -11,3986 | 2,40E-13  |
| GSTP1     | -11,4077 | 2,08E-169 |
| GSPT2     | -11,4082 | 2,08E-13  |
| WT1       | -11,4267 | 2,32E-13  |
| AFAP1L1   | -11,4294 | 3,17E-26  |

|           |          |           |
|-----------|----------|-----------|
| CPNE8     | -11,4374 | 1,73E-13  |
| TGM2      | -11,4375 | 4,92E-173 |
| COL11A1   | -11,4379 | 2,07E-13  |
| LINC00942 | -11,489  | 2,83E-14  |
| TOX       | -11,5192 | 1,77E-13  |
| PSMB8     | -11,5212 | 8,31E-51  |
| EPSTI1    | -11,5383 | 8,90E-27  |
| ZNF506    | -11,5523 | 1,11E-13  |
| MYHAS     | -11,5796 | 8,90E-14  |
| PLAT      | -11,5847 | 7,05E-14  |
| HAVCR1    | -11,5903 | 7,02E-14  |
| FRG1CP    | -11,5959 | 6,59E-14  |
| HKDC1     | -11,6067 | 1,22E-39  |
| FIGN      | -11,6099 | 6,07E-14  |
| ZNF300    | -11,6234 | 6,28E-14  |
| ZNF542P   | -11,6235 | 5,84E-14  |
| THBS2     | -11,6306 | 5,39E-14  |
| DPP4      | -11,6348 | 5,25E-75  |
| TCF4      | -11,6415 | 9,15E-14  |
| SAA1      | -11,6434 | 6,79E-14  |
| HOXD9     | -11,6537 | 1,19E-13  |
| LOC100126 | -11,6614 | 4,51E-14  |
| GCNT3     | -11,6817 | 4,00E-14  |
| UGT2B7    | -11,684  | 8,06E-14  |
| BAALC     | -11,6905 | 3,77E-14  |
| NEURL3    | -11,7099 | 3,35E-14  |
| LY6K      | -11,7178 | 3,46E-14  |
| HMGA2     | -11,737  | 7,03E-15  |
| KCNJ12    | -11,7463 | 2,87E-14  |
| CTSZ      | -11,7917 | 8,56E-162 |
| CDIP1     | -11,8046 | 1,86E-14  |
| CLEC4E    | -11,8118 | 2,51E-14  |
| GPX7      | -11,8156 | 1,79E-14  |
| TNC       | -11,8294 | 3,83E-105 |
| DGKI      | -11,8809 | 1,20E-14  |
| STK33     | -11,8861 | 1,25E-14  |
| SIGMAR1   | -11,8976 | 1,27E-28  |
| SPINK1    | -11,9095 | 1,53E-14  |
| CACNA1C   | -11,9211 | 2,59E-15  |
| GNG11     | -11,9392 | 9,04E-29  |
| C5orf42   | -11,9482 | 8,09E-15  |
| CNRIP1    | -11,9495 | 7,78E-15  |
| HOXA10    | -11,9647 | 6,96E-15  |
| FLG       | -11,9655 | 7,89E-15  |
| ZCCHC11   | -11,9802 | 7,81E-15  |
| HSPB2     | -11,9985 | 5,80E-15  |
| RAB38     | -12,0208 | 5,27E-15  |
| COL5A3    | -12,0254 | 6,60E-15  |
| ZNF773    | -12,0318 | 5,32E-15  |
| SERPINB2  | -12,0419 | 8,12E-15  |

|           |          |          |
|-----------|----------|----------|
| AFAP1-AS1 | -12,0562 | 4,04E-15 |
| CDHR1     | -12,0832 | 4,80E-15 |
| TRPA1     | -12,1117 | 2,83E-15 |
| AXL       | -12,1402 | 1,85E-43 |
| SPP1      | -12,1505 | 1,75E-09 |
| SEMA5A    | -12,156  | 2,18E-15 |
| CDK15     | -12,1574 | 2,59E-15 |
| ADRA1B    | -12,1612 | 2,10E-15 |
| CD40      | -12,1758 | 1,99E-15 |
| PVRL3     | -12,1773 | 2,16E-15 |
| LINC01322 | -12,1952 | 1,86E-15 |
| MARCH4    | -12,1975 | 1,75E-15 |
| KCNK3     | -12,2106 | 4,47E-30 |
| PDPN      | -12,2136 | 1,85E-15 |
| SMIM10    | -12,2334 | 1,46E-15 |
| SNHG18    | -12,24   | 1,68E-15 |
| MSC-AS1   | -12,297  | 9,07E-16 |
| C8orf88   | -12,306  | 8,47E-16 |
| PPAPDC1A  | -12,3076 | 8,87E-16 |
| LPAR1     | -12,3167 | 7,95E-16 |
| SLITRK2   | -12,3389 | 6,89E-16 |
| LINC00667 | -12,348  | 6,56E-16 |
| DZIP1     | -12,3689 | 6,01E-16 |
| ITGB3     | -12,3767 | 1,68E-16 |
| ZFHX4     | -12,385  | 5,92E-16 |
| ZNF320    | -12,4327 | 4,14E-16 |
| MAGI2-AS3 | -12,4382 | 5,16E-16 |
| PTPRD     | -12,4712 | 3,81E-16 |
| CDH6      | -12,5229 | 8,53E-17 |
| AGT       | -12,5602 | 2,16E-16 |
| TCEAL8    | -12,5792 | 1,87E-16 |
| RUNX1T1   | -12,5902 | 1,54E-16 |
| CHRD1     | -12,655  | 1,00E-16 |
| C10orf128 | -12,6674 | 8,93E-17 |
| CST7      | -12,7402 | 6,73E-17 |
| MOXD1     | -12,7699 | 5,13E-17 |
| MT1M      | -12,8442 | 2,94E-17 |
| NRG1      | -12,8681 | 2,50E-17 |
| VCAM1     | -12,8701 | 3,75E-17 |
| SFRP2     | -12,8766 | 2,44E-17 |
| LINC00839 | -12,8942 | 2,24E-17 |
| CD70      | -12,8984 | 1,52E-33 |
| NID2      | -12,9062 | 2,63E-17 |
| IFI16     | -12,9866 | 4,48E-34 |
| COL4A1    | -13,0038 | 6,25E-50 |
| AKT3      | -13,0789 | 6,91E-18 |
| RRAD      | -13,0799 | 6,57E-18 |
| PRKCDBP   | -13,0801 | 6,61E-18 |
| ZEB2      | -13,0848 | 6,33E-18 |
| LAMA1     | -13,1172 | 9,05E-18 |

|          |          |           |
|----------|----------|-----------|
| VSTM4    | -13,1245 | 4,91E-18  |
| PAX6     | -13,1605 | 4,09E-18  |
| AK5      | -13,1737 | 3,70E-18  |
| IGF2BP3  | -13,1822 | 3,40E-18  |
| SLC35G2  | -13,2084 | 2,87E-18  |
| NRIP3    | -13,2106 | 3,11E-18  |
| EVC      | -13,2346 | 2,43E-18  |
| IGFBP7   | -13,2746 | 2,41E-18  |
| MMP2     | -13,2778 | 2,56E-52  |
| MT1E     | -13,3191 | 1,45E-18  |
| ADAMTS1  | -13,3417 | 4,13E-19  |
| ABCA1    | -13,4328 | 8,21E-19  |
| GOS2     | -13,4424 | 6,32E-19  |
| CHST2    | -13,4509 | 6,01E-19  |
| SALL1    | -13,4516 | 6,04E-19  |
| SGCE     | -13,4661 | 5,46E-19  |
| NT5E     | -13,5257 | 3,70E-19  |
| COL1A2   | -13,5417 | 3,98E-19  |
| PREX2    | -13,5597 | 2,96E-19  |
| STAC     | -13,6085 | 2,22E-19  |
| LAYN     | -13,6136 | 2,06E-19  |
| KIAA1644 | -13,6265 | 1,91E-19  |
| STK32B   | -13,6277 | 1,91E-19  |
| MMP1     | -13,6351 | 1,80E-19  |
| DFNA5    | -13,7717 | 9,23E-20  |
| BHMT2    | -13,8131 | 5,89E-20  |
| PLAU     | -13,821  | 7,77E-20  |
| APCDD1L  | -13,831  | 5,24E-20  |
| NIPAL4   | -13,9025 | 3,04E-20  |
| ATP10A   | -13,9469 | 2,33E-20  |
| AKR1B1   | -13,9741 | 3,08E-109 |
| EPB41L3  | -13,975  | 1,88E-20  |
| GJB6     | -14,0054 | 1,60E-20  |
| GPX1     | -14,0139 | 1,59E-20  |
| RAC2     | -14,0753 | 9,69E-21  |
| PTPRM    | -14,079  | 1,05E-20  |
| MSC      | -14,1435 | 6,27E-21  |
| CXCL5    | -14,3169 | 2,47E-21  |
| HNF1B    | -14,3342 | 1,66E-21  |
| EMC10    | -14,343  | 2,02E-21  |
| RARRES2  | -14,5124 | 5,19E-22  |
| ALPK2    | -14,5369 | 4,10E-22  |
| MXRA8    | -14,5795 | 3,28E-22  |
| CNN3     | -14,5938 | 9,24E-23  |
| NNMT     | -14,6016 | 2,74E-22  |
| SNAI2    | -14,6086 | 2,50E-22  |
| EFEMP2   | -14,7732 | 9,09E-23  |
| APBB1IP  | -14,9877 | 2,23E-23  |
| WBP5     | -15,1818 | 4,36E-24  |
| KIRREL   | -15,1852 | 4,27E-24  |



|         |          |          |
|---------|----------|----------|
| ETS1    | -15,1972 | 3,95E-24 |
| GYPC    | -15,2451 | 2,79E-24 |
| ANGPTL2 | -15,2539 | 2,83E-24 |
| SPARC   | -15,2721 | 2,30E-24 |
| INHBA   | -15,3525 | 2,01E-24 |
| LRRN4   | -15,3565 | 1,24E-24 |
| NEFL    | -15,4352 | 7,02E-25 |
| GREM1   | -15,4358 | 6,98E-25 |
| CRYAB   | -15,6792 | 1,16E-25 |
| TNFRSF9 | -15,8655 | 3,56E-26 |
| IGFN1   | -16,1128 | 4,70E-27 |
| MYL9    | -16,3182 | 9,98E-28 |
| FLNC    | -16,9895 | 6,22E-30 |
| ANPEP   | -17,3129 | 4,62E-31 |

SF539

| Gene       | log2FoldCh FDR |          |
|------------|----------------|----------|
| CDH1       | 16,24549       | 3,32E-27 |
| MYH14      | 15,35603       | 1,56E-23 |
| FREM2      | 15,14729       | 6,40E-24 |
| FBP1       | 14,94056       | 4,52E-23 |
| TFF1       | 14,61192       | 4,69E-16 |
| MEST       | 14,59194       | 2,96E-22 |
| CLDN7      | 14,58601       | 3,29E-22 |
| LDOC1      | 14,53042       | 1,19E-21 |
| FOXA1      | 14,5052        | 5,34E-22 |
| ST14       | 14,45569       | 3,13E-21 |
| PROM2      | 14,43087       | 1,62E-13 |
| TSPYL5     | 14,39724       | 1,15E-21 |
| PTEN       | 14,25457       | 4,15E-21 |
| TACSTD2    | 14,24217       | 5,33E-21 |
| ABCA3      | 14,10189       | 5,63E-20 |
| PRSS8      | 14,09338       | 8,85E-21 |
| GRHL2      | 14,09299       | 2,21E-20 |
| RAB25      | 14,05204       | 1,78E-20 |
| FAM83H     | 14,04163       | 3,38E-21 |
| EVPL       | 13,75986       | 1,30E-19 |
| EPN3       | 13,74184       | 1,51E-19 |
| TJP3       | 13,55396       | 5,14E-18 |
| SBK1       | 13,48524       | 4,96E-19 |
| FLRT3      | 13,26207       | 2,57E-18 |
| TMEM30B    | 13,26057       | 3,03E-18 |
| ZNF467     | 13,24221       | 2,97E-18 |
| CLDN3      | 13,14161       | 1,16E-18 |
| DSCAM-AS1  | 13,11244       | 2,10E-10 |
| RHOD       | 13,08213       | 3,59E-17 |
| CAMSAP3    | 13,0443        | 8,95E-18 |
| TC2N       | 13,01729       | 3,38E-17 |
| VPS9D1-AS1 | 12,89786       | 6,72E-18 |
| RTN4RL1    | 12,88886       | 2,46E-17 |
| SLC27A2    | 12,87346       | 3,07E-17 |
| BSPRY      | 12,84256       | 4,64E-17 |
| LRRC61     | 12,74533       | 1,47E-16 |
| GGT6       | 12,73926       | 1,09E-15 |
| WDR72      | 12,71727       | 7,32E-17 |
| CDH3       | 12,6764        | 9,27E-48 |
| DLX3       | 12,55459       | 6,46E-16 |
| PRR15L     | 12,55326       | 5,68E-16 |
| KIAA1324L  | 12,52434       | 2,50E-16 |
| MGMT       | 12,50213       | 5,40E-16 |
| LONRF2     | 12,47675       | 2,04E-15 |
| IRX2       | 12,4731        | 3,56E-16 |
| MAL2       | 12,42992       | 3,90E-31 |
| AK7        | 12,38216       | 6,38E-16 |
| ALDH3B2    | 12,37771       | 6,87E-15 |

|           |          |          |
|-----------|----------|----------|
| KCNC3     | 12,33815 | 1,38E-15 |
| SYK       | 12,24432 | 1,52E-15 |
| TSTD1     | 12,22836 | 1,43E-15 |
| KIF26A    | 12,14861 | 1,05E-14 |
| KREMEN2   | 12,10932 | 8,30E-16 |
| KRTAP5-AS | 12,09343 | 1,46E-05 |
| PCDHA11   | 12,07078 | 7,17E-15 |
| GALNT6    | 12,03779 | 3,04E-15 |
| CBFA2T3   | 12,03195 | 4,87E-15 |
| RHPN1     | 12,0286  | 6,39E-15 |
| RBBP8NL   | 12,00634 | 9,02E-15 |
| CDC42BPG  | 12,00387 | 1,34E-14 |
| SHANK2    | 11,98659 | 6,24E-15 |
| OPLAH     | 11,94905 | 9,26E-15 |
| CYP2S1    | 11,92965 | 9,65E-14 |
| ARHGEF5   | 11,86049 | 2,77E-14 |
| DNAJA4    | 11,83448 | 2,83E-14 |
| SULT2B1   | 11,82982 | 3,01E-14 |
| PCSK1N    | 11,81584 | 1,86E-14 |
| OLFM1     | 11,8071  | 1,85E-14 |
| SCN4A     | 11,80472 | 2,86E-05 |
| GLB1L2    | 11,79534 | 2,04E-14 |
| ATAD1     | 11,77741 | 3,71E-15 |
| SULT1A1   | 11,73659 | 3,38E-07 |
| HENMT1    | 11,7178  | 3,25E-14 |
| HOOK1     | 11,69374 | 3,64E-14 |
| FAM213A   | 11,62268 | 1,28E-36 |
| BCAS1     | 11,62091 | 0,000106 |
| NCAM2     | 11,60922 | 2,09E-13 |
| ESPN      | 11,60716 | 8,04E-13 |
| ACTA2     | 11,58733 | 0,000115 |
| ALOX15    | 11,58112 | 2,39E-12 |
| TMEM45B   | 11,56227 | 8,02E-14 |
| KDF1      | 11,56133 | 9,79E-14 |
| RASGEF1A  | 11,51015 | 1,68E-13 |
| GALNT14   | 11,50929 | 1,10E-13 |
| ATP6V0E2  | 11,48138 | 1,12E-35 |
| SMIM22    | 11,46826 | 2,15E-13 |
| EPHA1     | 11,43819 | 2,54E-13 |
| ALG1L     | 11,42674 | 1,34E-12 |
| MINPP1    | 11,42559 | 2,06E-13 |
| MNX1      | 11,41998 | 2,03E-13 |
| EPCAM     | 11,36311 | 7,94E-97 |
| ASCL2     | 11,34691 | 1,26E-12 |
| C5orf38   | 11,33847 | 5,62E-13 |
| PCP4      | 11,33512 | 3,90E-13 |
| FGD3      | 11,30596 | 2,94E-12 |
| MNX1-AS1  | 11,30108 | 1,06E-12 |
| OVOL1     | 11,2161  | 2,06E-12 |
| PACSIN1   | 11,2046  | 3,87E-12 |

|          |          |           |
|----------|----------|-----------|
| SYT17    | 11,20404 | 6,80E-13  |
| CRB3     | 11,20301 | 2,04E-12  |
| ENTPD2   | 11,20015 | 2,14E-12  |
| ARHGDIG  | 11,18929 | 7,66E-13  |
| BMP7     | 11,1617  | 1,28E-98  |
| TMPRSS13 | 11,14819 | 1,74E-12  |
| TDRD1    | 11,14106 | 9,97E-13  |
| ILDR1    | 11,13534 | 1,05E-12  |
| RDH16    | 11,09279 | 1,80E-12  |
| PKP2     | 11,06412 | 9,06E-13  |
| RANBP17  | 11,06342 | 2,72E-12  |
| DPYSL5   | 11,02111 | 3,35E-12  |
| CACNA1D  | 11,02053 | 2,02E-12  |
| KCNK15   | 11,00214 | 2,73E-12  |
| SUSD3    | 10,99938 | 4,34E-11  |
| FXD3     | 10,98706 | 9,05E-12  |
| CST1     | 10,9382  | 4,11E-12  |
| C5AR2    | 10,93437 | 1,79E-11  |
| MB       | 10,92883 | 3,48E-12  |
| ELF3     | 10,90146 | 8,93E-12  |
| RGMA     | 10,88557 | 8,01E-12  |
| ESRP1    | 10,87263 | 7,92E-79  |
| KNDC1    | 10,84753 | 8,00E-11  |
| SPDEF    | 10,84685 | 1,28E-10  |
| LRP2     | 10,81226 | 3,10E-06  |
| MAPT     | 10,80644 | 1,45E-12  |
| PLEKHG6  | 10,80455 | 3,67E-11  |
| HPN      | 10,79524 | 1,28E-11  |
| POF1B    | 10,78759 | 5,43E-12  |
| ARHGAP44 | 10,7714  | 9,38E-12  |
| RET      | 10,76546 | 9,36E-11  |
| EPPK1    | 10,74729 | 7,05E-20  |
| PLXNA4   | 10,74637 | 2,05E-11  |
| DSP      | 10,72046 | 3,70E-23  |
| BCL11B   | 10,71768 | 5,11E-23  |
| SPESP1   | 10,70694 | 2,31E-11  |
| KCNH2    | 10,69945 | 1,35E-11  |
| CCDC64B  | 10,68501 | 2,65E-11  |
| RAB17    | 10,66524 | 3,08E-11  |
| KRT19    | 10,65595 | 0,000397  |
| ERBB3    | 10,6468  | 3,99E-53  |
| TMEM125  | 10,64219 | 1,91E-11  |
| FUOM     | 10,58554 | 3,09E-11  |
| PDE3B    | 10,56627 | 3,63E-11  |
| ODAM     | 10,56    | 3,08E-11  |
| CEACAM21 | 10,55097 | 3,60E-11  |
| ARHGEF35 | 10,5462  | 5,20E-11  |
| CLDN4    | 10,5436  | 4,39E-12  |
| KRT8     | 10,53244 | 9,07E-214 |
| TDRD5    | 10,52688 | 5,81E-11  |

|           |          |          |
|-----------|----------|----------|
| TSPEAR    | 10,51904 | 1,01E-10 |
| MYRIP     | 10,51759 | 9,54E-11 |
| FAM83B    | 10,50541 | 4,95E-12 |
| TMC5      | 10,4947  | 6,08E-11 |
| SH2D3A    | 10,47394 | 1,05E-10 |
| MPZL2     | 10,43594 | 1,47E-10 |
| PCDHA10   | 10,43252 | 8,62E-11 |
| LXN       | 10,42774 | 3,84E-09 |
| PLEKHB1   | 10,41082 | 2,03E-10 |
| KCNJ11    | 10,40865 | 2,24E-10 |
| DEF6      | 10,39038 | 8,19E-11 |
| ABCG1     | 10,38103 | 1,01E-11 |
| CASC9     | 10,35849 | 9,97E-11 |
| LAD1      | 10,35666 | 6,90E-09 |
| WSCD1     | 10,32848 | 1,57E-10 |
| EPHX2     | 10,29792 | 2,60E-10 |
| PCDHA12   | 10,29065 | 2,38E-10 |
| CHRM1     | 10,28237 | 6,90E-10 |
| HPDL      | 10,27349 | 1,74E-10 |
| HLA-DQB1  | 10,26236 | 9,71E-09 |
| ANXA9     | 10,25541 | 6,21E-11 |
| FAS       | 10,25158 | 1,35E-08 |
| C21orf91  | 10,24855 | 1,88E-10 |
| CNTNAP2   | 10,24791 | 2,70E-10 |
| CXCR4     | 10,22588 | 2,44E-10 |
| NSUN7     | 10,20824 | 2,50E-10 |
| ENPP4     | 10,19344 | 5,19E-10 |
| KRTAP3-1  | 10,18923 | 1,40E-09 |
| PRR15     | 10,18636 | 4,12E-10 |
| AIF1L     | 10,1858  | 1,01E-06 |
| RNLS      | 10,18416 | 2,90E-10 |
| TFF3      | 10,16653 | 3,98E-10 |
| DLGAP3    | 10,16469 | 3,06E-10 |
| C18orf63  | 10,15903 | 4,52E-10 |
| TNK1      | 10,15043 | 3,18E-11 |
| RERG      | 10,15012 | 3,39E-10 |
| ADAMTS19  | 10,11059 | 3,20E-20 |
| EN2       | 10,10013 | 4,45E-10 |
| IL17RB    | 10,08906 | 7,94E-10 |
| CEACAM1   | 10,08416 | 5,03E-10 |
| LINC00925 | 10,08174 | 5,54E-10 |
| OVOL2     | 10,07423 | 9,01E-09 |
| ERBB4     | 10,07289 | 8,35E-10 |
| MLXIPL    | 10,06914 | 8,83E-10 |
| KRT17     | 10,05944 | 6,41E-09 |
| PCSK6     | 10,04867 | 2,13E-11 |
| S100A14   | 10,04019 | 1,65E-05 |
| PRR36     | 10,03609 | 1,45E-86 |
| ZNF732    | 10,00847 | 1,56E-09 |
| BATF      | 9,991254 | 2,08E-09 |

|           |          |          |
|-----------|----------|----------|
| SLAIN1    | 9,986032 | 1,44E-09 |
| ASCL1     | 9,972194 | 2,10E-09 |
| GLS2      | 9,944475 | 1,10E-09 |
| LOC11323C | 9,938825 | 1,12E-10 |
| C12orf56  | 9,925934 | 1,37E-09 |
| PADI2     | 9,913465 | 2,39E-08 |
| EPHA6     | 9,912908 | 1,38E-09 |
| FAR2P1    | 9,903022 | 1,16E-08 |
| SLC9A4    | 9,892358 | 1,16E-08 |
| DNAH14    | 9,891693 | 4,71E-09 |
| DEGS2     | 9,883147 | 2,05E-09 |
| LOC728613 | 9,879187 | 1,68E-09 |
| UPK2      | 9,87641  | 3,95E-08 |
| KIF1A     | 9,868218 | 4,17E-19 |
| PRIMA1    | 9,85349  | 9,16E-09 |
| P2RY6     | 9,841918 | 3,42E-05 |
| COBL      | 9,838785 | 2,72E-10 |
| OR7E14P   | 9,830027 | 2,49E-09 |
| SYT3      | 9,824775 | 9,88E-09 |
| ANO9      | 9,822885 | 2,72E-09 |
| KCNQ1OT1  | 9,809243 | 1,18E-08 |
| PNPLA4    | 9,797638 | 2,59E-09 |
| CHST8     | 9,792985 | 2,66E-09 |
| S100P     | 9,759217 | 5,58E-07 |
| NOVA1     | 9,753331 | 5,68E-09 |
| SPINT1    | 9,746166 | 4,97E-80 |
| AKR1E2    | 9,728527 | 1,73E-08 |
| RNF125    | 9,720576 | 2,93E-08 |
| TBC1D30   | 9,715823 | 6,02E-43 |
| ESRP2     | 9,71092  | 2,16E-49 |
| KLLN      | 9,706916 | 3,52E-08 |
| NUP210    | 9,695019 | 9,16E-21 |
| MAPK4     | 9,663409 | 1,05E-07 |
| TUBA3E    | 9,658495 | 1,08E-08 |
| EPHA10    | 9,640385 | 6,35E-09 |
| SPATA18   | 9,63693  | 1,46E-07 |
| ZG16B     | 9,636582 | 6,88E-08 |
| LINC00960 | 9,634994 | 1,19E-08 |
| ECHDC3    | 9,616254 | 7,32E-09 |
| C10orf82  | 9,614468 | 1,24E-08 |
| MUC5B     | 9,607157 | 8,08E-09 |
| ZNF492    | 9,598681 | 4,41E-08 |
| CBLC      | 9,59315  | 1,08E-08 |
| SPINK5    | 9,589268 | 4,73E-08 |
| ENPEP     | 9,588043 | 8,94E-09 |
| DOCK8     | 9,579589 | 9,66E-09 |
| HID1      | 9,561197 | 1,48E-56 |
| YBX2      | 9,554859 | 3,20E-40 |
| CHRM3     | 9,55406  | 1,07E-08 |
| SLITRK4   | 9,546149 | 1,53E-08 |

|           |          |           |
|-----------|----------|-----------|
| PLEK2     | 9,540143 | 1,13E-08  |
| IRX4      | 9,516748 | 2,70E-08  |
| FAM19A5   | 9,499786 | 2,50E-08  |
| PRSS22    | 9,493024 | 3,50E-08  |
| SPINT2    | 9,476063 | 8,70E-156 |
| PLBD1     | 9,45903  | 3,21E-08  |
| POU3F3    | 9,442036 | 5,03E-08  |
| FUT9      | 9,441243 | 1,98E-08  |
| LRRC37A4F | 9,435716 | 2,87E-08  |
| GAL       | 9,433057 | 5,93E-33  |
| AP4B1-AS1 | 9,418947 | 1,47E-09  |
| TUBA3D    | 9,415037 | 4,73E-08  |
| PAX9      | 9,389909 | 2,71E-08  |
| KCNK5     | 9,369404 | 1,43E-07  |
| C2orf54   | 9,368902 | 3,83E-07  |
| PLA2G4F   | 9,367317 | 1,81E-06  |
| ALDH3A1   | 9,365262 | 1,27E-06  |
| LOC100506 | 9,354236 | 7,56E-08  |
| KLRG2     | 9,335728 | 4,82E-08  |
| ACTL8     | 9,325149 | 8,26E-08  |
| GCHFR     | 9,324896 | 4,52E-08  |
| ARHGEF34I | 9,316949 | 5,33E-08  |
| SFN       | 9,310413 | 4,99E-57  |
| CCDC78    | 9,306331 | 5,42E-08  |
| WISP2     | 9,29414  | 3,84E-06  |
| ANKRD18A  | 9,288214 | 4,94E-08  |
| FCGR1A    | 9,266354 | 3,82E-07  |
| RASAL1    | 9,261119 | 2,15E-07  |
| COL9A3    | 9,259139 | 6,93E-08  |
| EMID1     | 9,244538 | 6,84E-08  |
| SLC22A31  | 9,243672 | 7,13E-08  |
| LOC100505 | 9,239323 | 9,38E-08  |
| PVRL4     | 9,236668 | 1,42E-16  |
| RGS6      | 9,222958 | 1,27E-07  |
| COL4A5    | 9,188706 | 1,97E-07  |
| BGN       | 9,186107 | 0,000108  |
| CNGB3     | 9,175837 | 1,28E-07  |
| B3GALT4   | 9,17425  | 6,80E-07  |
| CACNG4    | 9,170101 | 6,21E-23  |
| DNAAF3    | 9,167051 | 2,76E-16  |
| FAM201A   | 9,163549 | 9,59E-08  |
| SFMBT2    | 9,157277 | 1,74E-07  |
| RIC3      | 9,15066  | 1,84E-07  |
| NDRG4     | 9,14276  | 2,04E-08  |
| SHH       | 9,139951 | 1,85E-07  |
| LINC00669 | 9,127202 | 1,80E-07  |
| FSTL4     | 9,115844 | 2,48E-07  |
| BLNK      | 9,107003 | 4,89E-06  |
| LINC00992 | 9,099839 | 1,57E-07  |
| ZNF876P   | 9,095636 | 1,42E-07  |

|           |          |          |
|-----------|----------|----------|
| NRG3      | 9,087924 | 2,62E-07 |
| SHANK1    | 9,074903 | 5,33E-07 |
| PTCHD2    | 9,067349 | 9,12E-07 |
| DTX4      | 9,066259 | 9,99E-09 |
| C6orf132  | 9,064545 | 6,72E-23 |
| RAB36     | 9,058453 | 1,06E-08 |
| GNG13     | 9,052773 | 5,17E-07 |
| JAK3      | 9,050269 | 1,84E-07 |
| TNFRSF11A | 9,046808 | 2,05E-07 |
| RSPH1     | 9,045658 | 5,29E-07 |
| C1orf210  | 9,041124 | 3,67E-07 |
| CHGA      | 9,038466 | 9,76E-09 |
| FOXP2     | 9,025431 | 3,52E-07 |
| LINC00858 | 9,024098 | 5,64E-07 |
| GSG1L     | 9,020048 | 2,31E-07 |
| KLHDC9    | 9,011353 | 2,57E-07 |
| IGSF5     | 9,006076 | 2,86E-07 |
| FAM110C   | 9,003721 | 1,44E-06 |
| CRABP1    | 8,996291 | 8,41E-07 |
| SOWAHB    | 8,967281 | 3,50E-07 |
| MAOB      | 8,956808 | 1,31E-06 |
| GRIK3     | 8,956733 | 1,58E-06 |
| ZNF695    | 8,946648 | 3,71E-07 |
| RPRM      | 8,946495 | 1,04E-06 |
| LOC100996 | 8,94231  | 4,40E-07 |
| LRRC37A8F | 8,941442 | 3,34E-07 |
| S100A9    | 8,936744 | 7,94E-05 |
| FAM83H-A  | 8,934869 | 2,23E-06 |
| ABCA12    | 8,934548 | 2,99E-08 |
| AGR2      | 8,932756 | 7,79E-06 |
| HTR2C     | 8,928403 | 3,66E-07 |
| LHX1      | 8,925827 | 4,45E-07 |
| KIAA1257  | 8,909756 | 6,85E-07 |
| LOC39981E | 8,909589 | 4,54E-07 |
| MATK      | 8,909455 | 4,68E-57 |
| ICA1      | 8,905167 | 1,10E-05 |
| CNNM1     | 8,894167 | 4,28E-07 |
| AEBP1     | 8,893221 | 7,27E-07 |
| RADIL     | 8,892404 | 1,79E-06 |
| PCDHA5    | 8,890315 | 4,55E-07 |
| SVIP      | 8,887158 | 5,20E-15 |
| CALCR     | 8,884156 | 6,98E-07 |
| LOC10028E | 8,879691 | 5,63E-07 |
| KCNMB2-A  | 8,878243 | 4,67E-07 |
| LRRC26    | 8,874724 | 2,22E-08 |
| KCNV1     | 8,87141  | 1,77E-06 |
| AARD      | 8,859064 | 2,44E-08 |
| HUNK      | 8,844953 | 1,61E-21 |
| SERPINB5  | 8,839418 | 1,40E-05 |
| LCN2      | 8,835751 | 3,23E-06 |



|            |          |           |
|------------|----------|-----------|
| PRODH      | 8,83185  | 7,43E-05  |
| MCF2L      | 8,831685 | 6,02E-07  |
| TMPRSS4    | 8,830699 | 1,04E-06  |
| CDC42EP5   | 8,827426 | 6,38E-07  |
| DMC1       | 8,825102 | 4,69E-06  |
| MMP11      | 8,823969 | 6,28E-07  |
| MPPED2     | 8,814946 | 2,67E-06  |
| INPP5D     | 8,813986 | 5,84E-05  |
| TPTE       | 8,808062 | 7,99E-07  |
| EDAR       | 8,807918 | 2,64E-06  |
| LOC644915  | 8,794305 | 1,15E-06  |
| PKP1       | 8,792592 | 3,89E-12  |
| PLD6       | 8,790537 | 1,54E-18  |
| DSCAM      | 8,787981 | 2,15E-06  |
| ADAMTS19   | 8,787722 | 8,07E-07  |
| PPL        | 8,758003 | 6,47E-11  |
| ARHGEF37   | 8,75682  | 5,03E-08  |
| SLC25A21-1 | 8,746969 | 1,39E-05  |
| KRT23      | 8,734418 | 1,03E-06  |
| LINC00664  | 8,731125 | 2,32E-06  |
| IGSF9B     | 8,725468 | 3,88E-06  |
| FRMPD1     | 8,724555 | 1,28E-06  |
| CCDC83     | 8,722003 | 1,84E-06  |
| SIGIRR     | 8,71851  | 1,71E-07  |
| KCNN2      | 8,714131 | 1,15E-06  |
| EFS        | 8,710633 | 2,89E-14  |
| FAM109B    | 8,707853 | 5,20E-08  |
| FAAH2      | 8,683932 | 1,89E-06  |
| TMEM139    | 8,663365 | 3,15E-06  |
| CARD14     | 8,63387  | 3,17E-06  |
| LOC728735  | 8,628402 | 2,05E-06  |
| DACH1      | 8,628135 | 1,82E-06  |
| FCHO1      | 8,62472  | 5,49E-48  |
| MYRFL      | 8,610504 | 3,64E-05  |
| FAM81B     | 8,602409 | 3,02E-06  |
| ATP2C2     | 8,599968 | 0,000146  |
| GREB1L     | 8,568589 | 1,03E-06  |
| TM7SF2     | 8,56803  | 8,93E-52  |
| MYO7A      | 8,552665 | 2,71E-06  |
| SMIM1      | 8,547134 | 9,55E-06  |
| LINC01006  | 8,535568 | 3,18E-06  |
| NPDC1      | 8,531769 | 9,86E-118 |
| PRRT4      | 8,522529 | 3,78E-06  |
| TMEM132f   | 8,494611 | 0,000215  |
| FAM155B    | 8,480267 | 1,87E-13  |
| EDA        | 8,470083 | 4,16E-06  |
| TNFSF13    | 8,450621 | 4,24E-07  |
| HLA-DRB5   | 8,446628 | 8,11E-06  |
| PAX2       | 8,443431 | 0,00015   |
| SLC22A11   | 8,438736 | 2,35E-05  |

|           |          |          |
|-----------|----------|----------|
| PVALB     | 8,434103 | 1,60E-05 |
| RASL11B   | 8,433983 | 2,88E-13 |
| CES3      | 8,43121  | 6,76E-06 |
| TCHHL1    | 8,425585 | 0,000332 |
| NMUR2     | 8,423593 | 5,52E-06 |
| FAM95C    | 8,414881 | 6,01E-06 |
| TMC4      | 8,412787 | 1,29E-05 |
| GUCY1B2   | 8,403746 | 2,06E-05 |
| RUNDC3A   | 8,400241 | 1,67E-05 |
| ADGRB1    | 8,399198 | 9,19E-25 |
| PIP5K1B   | 8,38748  | 8,03E-06 |
| IGFL1     | 8,368845 | 0,00032  |
| GATA5     | 8,368775 | 7,94E-06 |
| IGSF9     | 8,36805  | 4,58E-97 |
| CCDC64    | 8,366617 | 5,07E-13 |
| ATP2A3    | 8,36593  | 2,76E-05 |
| SERPINA3  | 8,354908 | 1,92E-05 |
| CRACR2A   | 8,354833 | 5,05E-05 |
| TESC      | 8,353503 | 9,39E-06 |
| NODAL     | 8,350848 | 1,48E-05 |
| PPP2R2C   | 8,343402 | 1,10E-74 |
| WIF1      | 8,342002 | 5,88E-05 |
| LOC102723 | 8,335792 | 9,33E-06 |
| SLC6A14   | 8,327831 | 9,64E-06 |
| MIR4697HG | 8,297854 | 2,56E-05 |
| CRACR2B   | 8,2887   | 4,53E-18 |
| TRPM2-AS  | 8,287204 | 1,08E-05 |
| GPR37L1   | 8,27392  | 1,45E-05 |
| HIST1H2BH | 8,270525 | 1,31E-05 |
| FOXA2     | 8,262029 | 1,22E-05 |
| AKR1C2    | 8,261782 | 4,76E-10 |
| PTK6      | 8,259555 | 4,96E-07 |
| SORL1     | 8,256916 | 1,98E-12 |
| HS6ST3    | 8,253478 | 1,49E-05 |
| MAPK15    | 8,239561 | 3,35E-05 |
| TARP      | 8,234812 | 7,05E-05 |
| NELL2     | 8,234098 | 2,29E-05 |
| F7        | 8,232471 | 6,15E-05 |
| PAH       | 8,227019 | 1,91E-05 |
| LIPA      | 8,225091 | 5,91E-05 |
| UNC5A     | 8,223509 | 1,71E-05 |
| SLC52A3   | 8,220589 | 2,63E-05 |
| KLHL35    | 8,210848 | 1,80E-05 |
| C2CD4D    | 8,205005 | 1,92E-05 |
| LOC728673 | 8,180486 | 0,00011  |
| LOC100996 | 8,164347 | 2,66E-05 |
| LRG1      | 8,161452 | 0,000121 |
| FLT3      | 8,149887 | 2,16E-05 |
| TTC39A    | 8,147831 | 5,43E-05 |
| CKMT1A    | 8,1474   | 1,08E-22 |

|           |          |           |
|-----------|----------|-----------|
| TRPV6     | 8,146199 | 2,32E-05  |
| TEX19     | 8,146145 | 8,57E-07  |
| RENBP     | 8,143655 | 3,54E-05  |
| WFDC2     | 8,134983 | 4,75E-05  |
| FOXI3     | 8,109154 | 2,98E-05  |
| VAMP8     | 8,099225 | 3,43E-34  |
| FA2H      | 8,096887 | 1,09E-09  |
| POU6F2    | 8,091036 | 3,27E-05  |
| COLCA1    | 8,084504 | 3,58E-05  |
| IFIT3     | 8,082923 | 9,03E-05  |
| RAPGEF5   | 8,062148 | 4,03E-05  |
| MSI1      | 8,050544 | 2,06E-55  |
| IGSF11    | 8,045618 | 3,56E-05  |
| TTYH1     | 8,037787 | 0,000168  |
| NOXA1     | 8,032895 | 0,000109  |
| APOA1     | 8,028889 | 4,58E-05  |
| MARVELD3  | 8,027258 | 2,86E-30  |
| SLC52A1   | 8,006725 | 0,000156  |
| MGC32805  | 8,005685 | 0,000145  |
| TENM4     | 7,998212 | 2,59E-06  |
| STK31     | 7,992194 | 6,83E-05  |
| GATA3-AS1 | 7,985983 | 5,56E-05  |
| CD8A      | 7,977994 | 1,61E-06  |
| TFR2      | 7,971348 | 2,03E-06  |
| TH        | 7,966514 | 9,09E-05  |
| RDM1      | 7,948966 | 7,13E-05  |
| XG        | 7,946875 | 0,000756  |
| ADAMTSL3  | 7,945766 | 8,20E-05  |
| ADGRE2    | 7,941957 | 2,28E-06  |
| TMEM105   | 7,93714  | 0,000106  |
| HTR6      | 7,935358 | 6,19E-05  |
| PMEL      | 7,930398 | 1,42E-05  |
| LOC440461 | 7,927139 | 0,000147  |
| ARL11     | 7,925278 | 7,06E-05  |
| BARX2     | 7,912836 | 0,0003    |
| EMCN      | 7,911873 | 7,86E-05  |
| LINC00885 | 7,908124 | 0,000373  |
| EWSAT1    | 7,895836 | 0,000134  |
| IGSF1     | 7,892342 | 0,000389  |
| LRRC10B   | 7,878794 | 0,000161  |
| FAM3B     | 7,875932 | 5,09E-16  |
| ATP8A1    | 7,870906 | 0,000114  |
| KRTAP4-1  | 7,860407 | 0,00015   |
| GPM6B     | 7,854019 | 8,99E-05  |
| SIDT1     | 7,832202 | 6,78E-11  |
| CCT6B     | 7,830771 | 3,60E-06  |
| SEPP1     | 7,825066 | 0,000387  |
| EPHB6     | 7,824542 | 0,000103  |
| CYP4F22   | 7,82295  | 0,00014   |
| UCP2      | 7,81979  | 2,80E-109 |

|           |          |          |
|-----------|----------|----------|
| C19orf33  | 7,815112 | 7,62E-19 |
| CALML5    | 7,813271 | 0,000195 |
| GJB5      | 7,813129 | 0,000581 |
| CCSER1    | 7,810611 | 0,000138 |
| C17orf104 | 7,805871 | 1,16E-05 |
| RNF223    | 7,796929 | 1,24E-10 |
| SGCG      | 7,796395 | 0,000293 |
| TLX1NB    | 7,789734 | 0,000121 |
| GJD3      | 7,778159 | 0,000206 |
| HBA1      | 7,777769 | 7,44E-06 |
| TMC6      | 7,761111 | 2,64E-31 |
| TTC6      | 7,749204 | 0,000161 |
| KLB       | 7,749204 | 0,000161 |
| LOC101925 | 7,744315 | 0,000189 |
| ARHGEF38  | 7,743087 | 0,000198 |
| KIF12     | 7,735278 | 0,000162 |
| PRRG2     | 7,72974  | 5,54E-10 |
| CAPN9     | 7,727874 | 0,0002   |
| DEFB126   | 7,721212 | 0,000167 |
| FAM84B    | 7,719291 | 5,00E-60 |
| VANGL2    | 7,714496 | 0,000182 |
| LMX1B     | 7,711987 | 7,61E-15 |
| SMTNL2    | 7,700231 | 0,000208 |
| LY6G5C    | 7,695686 | 0,000216 |
| CELF3     | 7,673878 | 0,000318 |
| PNMA6A    | 7,673535 | 0,000275 |
| C2orf15   | 7,672674 | 3,14E-22 |
| PDGFB     | 7,672541 | 1,44E-18 |
| FCGBP     | 7,66317  | 0,000477 |
| ACTR3C    | 7,640533 | 7,31E-06 |
| SYTL1     | 7,639905 | 7,84E-22 |
| SMPDL3B   | 7,634803 | 4,66E-42 |
| GOLT1A    | 7,63441  | 3,46E-10 |
| NEBL      | 7,634259 | 1,06E-37 |
| COL26A1   | 7,630878 | 0,000708 |
| TTC9      | 7,627016 | 9,61E-46 |
| SLC5A5    | 7,626837 | 0,000568 |
| CEACAM5   | 7,609003 | 0,000641 |
| KCNJ4     | 7,608023 | 0,0003   |
| PLEKHA6   | 7,601151 | 1,01E-36 |
| NUP62CL   | 7,600453 | 1,13E-05 |
| LINC00494 | 7,597256 | 0,000287 |
| LRRIQ1    | 7,593199 | 0,000301 |
| GADD45G   | 7,576983 | 1,41E-11 |
| PGM5      | 7,574964 | 1,42E-05 |
| CNTNAP3   | 7,574928 | 0,000324 |
| IRF6      | 7,572653 | 3,26E-20 |
| LLGL2     | 7,572583 | 2,73E-99 |
| SMIM10L2  | 7,569862 | 0,000715 |
| KRTCAP3   | 7,569617 | 2,93E-05 |

|           |          |           |
|-----------|----------|-----------|
| CA4       | 7,565268 | 0,000413  |
| ZMAT1     | 7,560997 | 0,000134  |
| SAMD12-A  | 7,555879 | 0,000425  |
| FAM69B    | 7,550317 | 6,51E-10  |
| LINC00959 | 7,537105 | 1,21E-05  |
| FAM83F    | 7,531069 | 0,000854  |
| LINC01132 | 7,530793 | 4,18E-05  |
| MIPOL1    | 7,527291 | 1,69E-17  |
| RGS16     | 7,523659 | 1,78E-15  |
| ADIRF     | 7,515006 | 4,75E-22  |
| RNF208    | 7,512477 | 4,34E-25  |
| BRINP2    | 7,507628 | 0,000793  |
| PARD6A    | 7,494912 | 2,53E-09  |
| NMNAT3    | 7,484871 | 0,000616  |
| SRCIN1    | 7,477111 | 1,48E-05  |
| KLF8      | 7,469626 | 0,000571  |
| MIR4664   | 7,463123 | 0,00051   |
| MARC1     | 7,449949 | 6,27E-37  |
| MMP25     | 7,445639 | 0,001008  |
| GJB2      | 7,43331  | 4,55E-15  |
| GALNT12   | 7,428349 | 2,06E-25  |
| PLA2G3    | 7,418329 | 8,10E-05  |
| SLC29A2   | 7,393181 | 2,35E-72  |
| IGFBP2    | 7,385031 | 4,01E-95  |
| LRFN5     | 7,379804 | 0,000724  |
| FBXO15    | 7,375015 | 2,41E-05  |
| ARHGEF4   | 7,370379 | 2,44E-05  |
| SSPO      | 7,359208 | 0,001006  |
| PACRG     | 7,347401 | 0,000852  |
| SOX11     | 7,343542 | 0,00093   |
| MYO1D     | 7,342558 | 1,96E-48  |
| PDIA2     | 7,330594 | 0,000874  |
| SERPINB9  | 7,318514 | 0,000985  |
| CHDH      | 7,306898 | 9,05E-14  |
| C19orf81  | 7,302843 | 3,24E-05  |
| SYT7      | 7,283569 | 6,65E-121 |
| PRSS16    | 7,274596 | 5,68E-19  |
| CTSH      | 7,271008 | 3,53E-30  |
| PTPN6     | 7,236856 | 9,64E-30  |
| MTMR7     | 7,234617 | 4,15E-05  |
| MFAP3L    | 7,215599 | 6,11E-17  |
| ESR1      | 7,213263 | 2,91E-90  |
| HES2      | 7,188075 | 8,56E-11  |
| ASCL4     | 7,183905 | 0,000159  |
| GRTP1     | 7,163469 | 6,81E-22  |
| TMEM178E  | 7,144543 | 6,96E-16  |
| AREG      | 7,140333 | 2,70E-22  |
| AP1G2     | 7,130318 | 5,95E-46  |
| STXBP2    | 7,130315 | 1,78E-50  |
| PCDH19    | 7,127594 | 0,000118  |

|            |          |           |
|------------|----------|-----------|
| NUP210L    | 7,124306 | 3,49E-21  |
| TGFA       | 7,119404 | 2,55E-10  |
| SGPP2      | 7,095343 | 9,81E-05  |
| RND2       | 7,087736 | 2,23E-14  |
| MACROD2    | 7,080658 | 0,000122  |
| APCDD1     | 7,073009 | 2,28E-150 |
| MYH10      | 7,061379 | 2,90E-95  |
| SLC9A2     | 7,053841 | 8,16E-07  |
| SHC2       | 7,025935 | 0,000198  |
| TEX40      | 7,016979 | 0,000103  |
| XKRX       | 6,995134 | 0,00019   |
| BMP8B      | 6,992383 | 0,000116  |
| JUP        | 6,980856 | 6,45E-77  |
| CYFIP2     | 6,980282 | 9,45E-26  |
| ASCL5      | 6,979145 | 0,000116  |
| TAPT1-AS1  | 6,977603 | 0,000118  |
| SLC24A3    | 6,971819 | 6,58E-11  |
| MAP7       | 6,943895 | 3,30E-58  |
| RUNDC3A-   | 6,925675 | 1,01E-08  |
| DENND2D    | 6,920858 | 2,69E-31  |
| SNAR-E     | 6,91235  | 0,000281  |
| PEX11G     | 6,910168 | 0,00024   |
| CAMK2B     | 6,905645 | 1,37E-10  |
| NPY1R      | 6,890461 | 1,21E-26  |
| RIMKLA     | 6,888163 | 4,86E-13  |
| PRPH       | 6,880054 | 1,52E-07  |
| ITGB4      | 6,877874 | 1,07E-54  |
| SLC25A21   | 6,866657 | 0,000197  |
| PKIB       | 6,861312 | 9,83E-66  |
| ZNF730     | 6,858894 | 2,46E-07  |
| P2RY2      | 6,847294 | 1,29E-53  |
| ZNF98      | 6,844458 | 0,000337  |
| PLEKHA7    | 6,838324 | 5,28E-38  |
| SLC26A4-A' | 6,837449 | 3,14E-10  |
| MYO15B     | 6,824341 | 0,000235  |
| LINC00649  | 6,815252 | 0,000222  |
| AMIGO1     | 6,813703 | 2,30E-07  |
| MUC1       | 6,81276  | 2,85E-31  |
| GYLTL1B    | 6,812605 | 1,71E-41  |
| GRB7       | 6,800173 | 0,000349  |
| HCN4       | 6,787267 | 2,04E-12  |
| NCKAP5     | 6,77418  | 9,00E-10  |
| CPT1C      | 6,769598 | 1,74E-06  |
| LOC28333E  | 6,766516 | 0,000526  |
| LAMA5      | 6,747195 | 7,49E-119 |
| PCSK9      | 6,741894 | 5,53E-08  |
| CERS4      | 6,735718 | 2,18E-15  |
| NEB        | 6,712771 | 2,67E-32  |
| KRT18      | 6,69601  | 1,25E-75  |
| N4BP3      | 6,689326 | 2,70E-38  |

|           |          |           |
|-----------|----------|-----------|
| ERVMER34  | 6,688441 | 1,35E-11  |
| MAML3     | 6,659202 | 2,80E-09  |
| BCAS3     | 6,656402 | 2,69E-111 |
| GRID1     | 6,63447  | 0,000518  |
| CYP1A1    | 6,610682 | 2,87E-08  |
| MARVELD2  | 6,607205 | 1,03E-46  |
| ZFP2      | 6,59261  | 0,000837  |
| PTP4A3    | 6,591209 | 1,04E-33  |
| SPTSSB    | 6,540157 | 2,72E-25  |
| LYPD3     | 6,524072 | 3,44E-25  |
| PCDHB3    | 6,490967 | 3,17E-35  |
| ADGRV1    | 6,486729 | 2,49E-09  |
| ELF5      | 6,47932  | 5,44E-08  |
| MYO5C     | 6,471855 | 9,63E-111 |
| RHOV      | 6,460515 | 1,85E-24  |
| PDE9A     | 6,450285 | 4,00E-06  |
| POTEF     | 6,442483 | 0,000929  |
| ARHGEF16  | 6,431107 | 2,55E-38  |
| PARD6B    | 6,421064 | 8,01E-90  |
| LOC148705 | 6,399633 | 3,43E-08  |
| DDIT4L    | 6,394367 | 8,99E-15  |
| NUTM2A-A  | 6,386043 | 1,92E-13  |
| FLT4      | 6,379815 | 2,98E-05  |
| TPD52L1   | 6,362162 | 2,25E-64  |
| MALRD1    | 6,359698 | 1,23E-08  |
| TMEM238   | 6,355039 | 3,48E-13  |
| KHK       | 6,345511 | 4,79E-47  |
| FDXR      | 6,340828 | 3,59E-27  |
| ARVCF     | 6,336343 | 2,49E-41  |
| F11R      | 6,323727 | 1,64E-125 |
| TP53TG1   | 6,322496 | 3,21E-25  |
| RAP1GAP2  | 6,311451 | 8,70E-43  |
| FAM174B   | 6,30983  | 9,86E-26  |
| C9orf152  | 6,309106 | 1,59E-27  |
| SYNE4     | 6,251443 | 5,70E-34  |
| LMTK3     | 6,250339 | 1,71E-13  |
| C19orf57  | 6,24983  | 5,03E-05  |
| CGREF1    | 6,236894 | 1,81E-49  |
| C4orf19   | 6,23135  | 1,61E-05  |
| TNFAIP8L3 | 6,199209 | 3,18E-24  |
| NUDT7     | 6,196253 | 1,55E-05  |
| ZNF185    | 6,170264 | 3,48E-21  |
| ZP3       | 6,165715 | 5,28E-38  |
| CCDC88C   | 6,161807 | 1,03E-55  |
| MTSS1     | 6,152723 | 2,65E-13  |
| VRK2      | 6,124443 | 1,36E-33  |
| BIK       | 6,124198 | 1,25E-07  |
| CGN       | 6,112954 | 1,89E-48  |
| ADCY1     | 6,111209 | 1,80E-21  |
| INHA      | 6,104441 | 0,000352  |

|           |          |           |
|-----------|----------|-----------|
| SORBS1    | 6,094391 | 2,89E-05  |
| KLHL29    | 6,08606  | 4,80E-05  |
| NES       | 6,070829 | 1,33E-19  |
| FAM83E    | 6,06971  | 9,52E-05  |
| CKMT1B    | 6,069641 | 3,94E-46  |
| MIR4737   | 6,063405 | 6,37E-05  |
| C2orf81   | 6,038763 | 6,82E-10  |
| FGFR4     | 6,0372   | 2,46E-59  |
| DLG3      | 6,004633 | 4,99E-74  |
| ADAMTS13  | 5,996542 | 1,99E-06  |
| TMEM52    | 5,991969 | 3,25E-10  |
| CTXN1     | 5,974623 | 2,54E-61  |
| STARD10   | 5,962318 | 7,72E-57  |
| KYNU      | 5,905472 | 2,19E-23  |
| LLPH-AS1  | 5,905095 | 8,60E-05  |
| ALDOC     | 5,899758 | 1,37E-26  |
| ZSCAN12P1 | 5,898727 | 4,96E-09  |
| PCDH1     | 5,882769 | 5,82E-37  |
| ACSS3     | 5,842497 | 2,49E-113 |
| ANXA3     | 5,839988 | 8,47E-08  |
| CELF5     | 5,831815 | 1,40E-06  |
| GSTO2     | 5,829613 | 1,53E-37  |
| ENTPD1    | 5,828168 | 1,10E-13  |
| ZNF385C   | 5,8187   | 5,33E-06  |
| CSPG5     | 5,796263 | 1,44E-08  |
| HLA-DRB1  | 5,796008 | 2,10E-07  |
| PAIP2B    | 5,794132 | 2,05E-26  |
| RBM47     | 5,787323 | 5,15E-51  |
| XK        | 5,784482 | 1,88E-06  |
| DMKN      | 5,777436 | 2,76E-18  |
| TENM1     | 5,775708 | 2,03E-05  |
| NRXN3     | 5,772173 | 1,90E-07  |
| CELSR2    | 5,76953  | 1,10E-85  |
| RIMS4     | 5,756278 | 3,63E-13  |
| GLDN      | 5,7511   | 0,000244  |
| ACBD4     | 5,749028 | 0,000131  |
| WNK2      | 5,739795 | 1,04E-43  |
| NRARP     | 5,733828 | 2,72E-23  |
| ITGA2B    | 5,72789  | 6,04E-07  |
| VAV1      | 5,717267 | 3,54E-10  |
| ZNF296    | 5,697858 | 8,96E-25  |
| STAP2     | 5,695248 | 2,08E-59  |
| EHF       | 5,68955  | 2,44E-14  |
| LSR       | 5,67794  | 1,86E-111 |
| LOC101927 | 5,661457 | 3,19E-28  |
| PCDHA13   | 5,658009 | 1,99E-05  |
| AGMAT     | 5,657983 | 5,48E-17  |
| TMEM191   | 5,656108 | 2,75E-29  |
| MAPK13    | 5,654328 | 1,04E-34  |
| NPNT      | 5,647971 | 9,64E-31  |



|          |          |           |
|----------|----------|-----------|
| PPM1E    | 5,646595 | 1,82E-20  |
| CCDC170  | 5,637127 | 1,00E-11  |
| KCNN1    | 5,615851 | 0,000787  |
| DNAH3    | 5,615153 | 5,30E-06  |
| DHRS2    | 5,613245 | 1,76E-32  |
| HSD11B2  | 5,609266 | 6,07E-13  |
| C2CD4C   | 5,588484 | 0,000793  |
| TRPV3    | 5,578756 | 1,77E-07  |
| FHIT     | 5,570938 | 5,05E-10  |
| F12      | 5,570236 | 2,76E-87  |
| PPP1R9A  | 5,566522 | 1,88E-47  |
| MYT1     | 5,556103 | 1,36E-07  |
| RAI2     | 5,503829 | 0,000138  |
| TNFRSF18 | 5,488142 | 1,94E-05  |
| CEBPA    | 5,482538 | 3,89E-16  |
| KLHL13   | 5,480272 | 5,66E-07  |
| RAB3D    | 5,476338 | 1,37E-63  |
| AMZ1     | 5,461607 | 3,29E-05  |
| EGFL7    | 5,458521 | 1,18E-29  |
| SLC37A1  | 5,458501 | 1,56E-26  |
| SLC27A5  | 5,454692 | 6,63E-36  |
| PKP3     | 5,448347 | 1,91E-71  |
| LPAR2    | 5,445682 | 2,87E-23  |
| GGT1     | 5,432148 | 3,10E-21  |
| LINGO1   | 5,43182  | 3,75E-44  |
| SLC2A4   | 5,41729  | 1,65E-05  |
| OCLN     | 5,414574 | 6,19E-34  |
| PPFIBP2  | 5,413136 | 4,33E-20  |
| ERG      | 5,393232 | 1,61E-05  |
| SLC27A3  | 5,386939 | 3,41E-43  |
| AP1M2    | 5,386193 | 5,40E-106 |
| KCNJ3    | 5,384381 | 3,94E-06  |
| PRAME    | 5,373242 | 8,39E-10  |
| SPTBN2   | 5,367158 | 1,75E-56  |
| PRKCZ    | 5,365196 | 4,73E-44  |
| MIF4GD   | 5,361971 | 1,27E-11  |
| LMF1     | 5,359163 | 6,04E-25  |
| CACNA2D2 | 5,350919 | 0,0009    |
| ACTL10   | 5,350673 | 6,10E-06  |
| ISYNA1   | 5,34267  | 2,18E-57  |
| CNIH2    | 5,335135 | 1,20E-18  |
| ELMO3    | 5,331805 | 3,22E-32  |
| NAALADL2 | 5,32935  | 4,55E-18  |
| DGAT2    | 5,328111 | 2,96E-17  |
| DBNDD1   | 5,319144 | 1,72E-83  |
| HS6ST2   | 5,300247 | 2,63E-31  |
| ZFHX2    | 5,280343 | 0,000189  |
| TMEM254- | 5,277538 | 2,82E-07  |
| CRABP2   | 5,250061 | 5,81E-33  |
| EBP      | 5,246229 | 8,21E-24  |

|         |          |           |
|---------|----------|-----------|
| ARRDC4  | 5,242336 | 1,30E-24  |
| PLCH1   | 5,240381 | 3,99E-45  |
| MISP    | 5,239051 | 5,86E-32  |
| MYO5B   | 5,238126 | 6,16E-74  |
| PAX5    | 5,233822 | 0,000641  |
| CTSV    | 5,229754 | 2,65E-08  |
| RNF43   | 5,221651 | 1,97E-104 |
| SYNPO2  | 5,213977 | 1,67E-21  |
| NUDT8   | 5,211426 | 1,52E-26  |
| TMEM163 | 5,204875 | 2,87E-05  |
| RASGRF1 | 5,201005 | 5,05E-28  |
| ACBD7   | 5,195201 | 6,93E-20  |
| OGDHL   | 5,186127 | 7,19E-14  |
| FES     | 5,179713 | 0,000393  |
| PROSER2 | 5,177551 | 3,84E-13  |
| EFNA3   | 5,174805 | 3,20E-28  |
| EEF1A2  | 5,167518 | 1,52E-71  |
| SEMA4A  | 5,151566 | 4,43E-18  |
| ASS1    | 5,147417 | 1,87E-40  |
| ZFYVE28 | 5,145059 | 7,73E-14  |
| CDS1    | 5,138911 | 1,86E-51  |
| JMJD8   | 5,126135 | 1,93E-76  |
| GRB14   | 5,121981 | 1,31E-24  |
| LGR6    | 5,118988 | 3,15E-05  |
| GPLD1   | 5,115898 | 1,07E-06  |
| PRLR    | 5,110059 | 3,09E-45  |
| MBP     | 5,096394 | 0,0002    |
| CYP2R1  | 5,079998 | 7,65E-05  |
| PLEKHH1 | 5,074594 | 9,96E-30  |
| ABLIM2  | 5,073226 | 6,27E-05  |
| ENPP5   | 5,072214 | 9,81E-06  |
| FUT1    | 5,071605 | 1,80E-10  |
| PTPRO   | 5,06379  | 1,16E-13  |
| EXPH5   | 5,059249 | 5,20E-11  |
| BTG2    | 5,058607 | 2,75E-26  |
| MANSC1  | 5,055516 | 5,91E-20  |
| GALNT18 | 5,053014 | 4,48E-11  |
| TTYH2   | 5,04902  | 1,95E-07  |
| SP6     | 5,043349 | 4,38E-29  |
| CXCL16  | 5,042359 | 1,52E-25  |
| FGFBP3  | 5,039527 | 0,000125  |
| RAB39B  | 5,035586 | 0,000109  |
| TP73    | 5,032576 | 1,40E-09  |
| SP5     | 5,023961 | 3,15E-66  |
| SUSD2   | 5,02225  | 5,11E-08  |
| ZNF681  | 5,020147 | 8,64E-28  |
| SMKR1   | 5,014137 | 2,02E-18  |
| PEX1    | 5,01121  | 3,11E-37  |
| CCDC74B | 5,00704  | 5,67E-06  |
| ZNF165  | 5,000207 | 1,84E-38  |

|           |          |          |
|-----------|----------|----------|
| RAB26     | 4,995313 | 5,09E-09 |
| RNASET2   | 4,977333 | 2,17E-32 |
| JAG2      | 4,973696 | 9,87E-39 |
| SELENBP1  | 4,963395 | 1,22E-48 |
| ZNF837    | 4,961305 | 5,21E-13 |
| ATP1A3    | 4,947622 | 5,14E-18 |
| ZNF610    | 4,946489 | 0,000376 |
| NFE2      | 4,883423 | 8,44E-07 |
| GATA3     | 4,87812  | 4,89E-85 |
| C15orf59  | 4,877496 | 8,31E-14 |
| KRT15     | 4,874518 | 2,81E-05 |
| IL17RE    | 4,842322 | 9,39E-05 |
| ARRDC1    | 4,803396 | 1,94E-53 |
| FRAS1     | 4,796146 | 2,32E-28 |
| GOLGA7B   | 4,792678 | 2,07E-11 |
| ALDH5A1   | 4,772294 | 4,30E-49 |
| DCDC2     | 4,754487 | 7,32E-10 |
| DKK1      | 4,745271 | 4,59E-15 |
| DMTN      | 4,735985 | 2,04E-22 |
| ABAT      | 4,735043 | 3,74E-12 |
| CDK18     | 4,728275 | 1,76E-20 |
| RPARP-AS1 | 4,710362 | 4,19E-09 |
| NRCAM     | 4,702775 | 4,75E-22 |
| TMEM102   | 4,69674  | 7,13E-19 |
| RIPK4     | 4,695382 | 1,15E-14 |
| CADM4     | 4,67969  | 2,27E-25 |
| PCDHB4    | 4,675611 | 1,08E-05 |
| LOC100134 | 4,670682 | 6,81E-05 |
| AQP3      | 4,65706  | 0,000415 |
| RNFT2     | 4,654341 | 2,80E-10 |
| RPP25     | 4,644324 | 1,86E-42 |
| SH2B2     | 4,641624 | 4,69E-23 |
| CPNE7     | 4,633803 | 1,11E-12 |
| CDKN1A    | 4,630765 | 5,00E-21 |
| NPW       | 4,630559 | 3,42E-06 |
| MAST1     | 4,622833 | 4,20E-11 |
| LOC439994 | 4,613594 | 6,46E-07 |
| ZNF607    | 4,609864 | 1,20E-30 |
| ABCA2     | 4,592688 | 1,60E-50 |
| FMO5      | 4,588665 | 1,47E-05 |
| STMND1    | 4,57571  | 0,000457 |
| EFNB3     | 4,564878 | 2,24E-14 |
| PRSS27    | 4,563786 | 1,60E-05 |
| TRAPPC6A  | 4,556654 | 1,53E-25 |
| SYNGR1    | 4,551718 | 1,19E-10 |
| ADRA2C    | 4,550039 | 2,20E-43 |
| ACE       | 4,548918 | 0,000316 |
| MARCH1    | 4,533785 | 6,96E-07 |
| DOCK6     | 4,529995 | 1,39E-50 |
| SEMA4G    | 4,511691 | 1,28E-06 |

|           |          |           |
|-----------|----------|-----------|
| HOOK2     | 4,491354 | 2,03E-57  |
| PCDHGB5   | 4,484824 | 6,91E-06  |
| TNNT1     | 4,48329  | 3,91E-98  |
| H1FO      | 4,47659  | 1,01E-24  |
| LDHD      | 4,471135 | 3,88E-06  |
| ROGDI     | 4,470557 | 2,98E-38  |
| KLHDC7B   | 4,467543 | 1,07E-06  |
| LINC00052 | 4,457884 | 6,48E-06  |
| CRYL1     | 4,450999 | 2,82E-27  |
| RAB3IP    | 4,445008 | 3,94E-79  |
| SCNN1A    | 4,425829 | 7,32E-06  |
| MACROD1   | 4,414834 | 9,51E-30  |
| CHMP4C    | 4,413778 | 7,33E-22  |
| CYB561    | 4,403265 | 1,37E-120 |
| ZNF711    | 4,402449 | 7,90E-10  |
| FAM117B   | 4,379272 | 1,90E-27  |
| NAT8L     | 4,378904 | 2,86E-18  |
| ZNF630    | 4,378285 | 1,02E-06  |
| SAMD10    | 4,374494 | 1,34E-08  |
| GATS      | 4,371032 | 7,29E-13  |
| FBXO27    | 4,37084  | 8,24E-15  |
| TCEA3     | 4,365674 | 6,13E-50  |
| SEMA6B    | 4,362857 | 5,81E-22  |
| GALNT3    | 4,360324 | 3,86E-45  |
| DPYSL4    | 4,35557  | 1,76E-08  |
| TLE2      | 4,355058 | 2,18E-40  |
| NKAIN1    | 4,352504 | 3,06E-21  |
| SEMA4D    | 4,347635 | 4,48E-17  |
| RAB11FIP4 | 4,332295 | 9,35E-52  |
| ADGRG6    | 4,325911 | 4,93E-10  |
| FGD4      | 4,318837 | 1,59E-16  |
| SLC4A11   | 4,311527 | 5,11E-06  |
| HIST1H3G  | 4,311418 | 0,000413  |
| VAV3      | 4,310812 | 1,39E-45  |
| IL17RD    | 4,307114 | 8,48E-14  |
| UFSP1     | 4,299812 | 0,000151  |
| HSD17B8   | 4,288258 | 4,67E-14  |
| CYP4F11   | 4,28745  | 1,36E-05  |
| TGM1      | 4,287363 | 4,61E-06  |
| RHOF      | 4,287153 | 7,75E-33  |
| ROCK1P1   | 4,275441 | 7,49E-05  |
| ARSG      | 4,271836 | 4,95E-10  |
| PRTFDC1   | 4,258824 | 1,77E-05  |
| TMEM134   | 4,254002 | 8,27E-28  |
| CFAP53    | 4,252282 | 3,32E-05  |
| GJA3      | 4,251743 | 2,93E-07  |
| MFSD6     | 4,246338 | 3,44E-34  |
| CNKSRI    | 4,24002  | 4,49E-13  |
| MYLIP     | 4,238204 | 5,92E-33  |
| GSTZ1     | 4,238029 | 1,90E-64  |

|           |          |          |
|-----------|----------|----------|
| ZDHC11    | 4,23689  | 0,000604 |
| LIN7A     | 4,236046 | 1,11E-26 |
| GAA       | 4,235217 | 5,41E-23 |
| DYRK1B    | 4,234565 | 1,03E-24 |
| CNFN      | 4,229779 | 0,000631 |
| IDNK      | 4,226784 | 8,06E-14 |
| DENND6B   | 4,224962 | 1,22E-08 |
| C11orf80  | 4,224581 | 1,32E-25 |
| PCDHA6    | 4,214077 | 1,14E-45 |
| SYNGR3    | 4,211778 | 3,24E-06 |
| SYBU      | 4,203832 | 3,05E-08 |
| SULF2     | 4,189164 | 1,21E-51 |
| GREB1     | 4,189105 | 6,71E-43 |
| CACNB3    | 4,184531 | 4,14E-61 |
| MTL5      | 4,181216 | 1,59E-18 |
| DDR1      | 4,180633 | 4,73E-26 |
| BEND5     | 4,167405 | 1,42E-08 |
| LOC729737 | 4,165817 | 0,000356 |
| GDF15     | 4,138572 | 4,10E-16 |
| TUSC3     | 4,136439 | 5,37E-26 |
| ADAM11    | 4,125426 | 1,81E-14 |
| SHISA9    | 4,123604 | 1,08E-09 |
| MYEF2     | 4,123079 | 1,33E-26 |
| NOTCH3    | 4,122304 | 9,34E-75 |
| KSR2      | 4,114508 | 2,02E-06 |
| C6orf52   | 4,111551 | 1,61E-06 |
| RHOBTB1   | 4,105011 | 2,60E-89 |
| CA8       | 4,102387 | 3,63E-05 |
| GRHL3     | 4,100644 | 4,76E-17 |
| SEPT3     | 4,099905 | 3,03E-20 |
| DCLK1     | 4,079961 | 2,55E-34 |
| PTGES     | 4,07284  | 2,40E-07 |
| ST8SIA4   | 4,051114 | 8,03E-10 |
| MFAP2     | 4,049109 | 4,87E-16 |
| EPB41L4B  | 4,03142  | 1,59E-24 |
| ADAM22    | 4,031126 | 4,30E-28 |
| ELOVL7    | 4,027111 | 8,99E-34 |
| CSTA      | 4,026083 | 1,42E-05 |
| THEM6     | 4,020077 | 1,65E-28 |
| ELL3      | 4,000791 | 4,70E-18 |
| LRRC75B   | 3,996958 | 5,70E-14 |
| ZBTB42    | 3,993681 | 4,97E-38 |
| REPS2     | 3,993446 | 0,000178 |
| RASD1     | 3,993297 | 0,000372 |
| TKFC      | 3,992868 | 3,71E-59 |
| ZSCAN16   | 3,990178 | 1,92E-25 |
| LAMP3     | 3,989213 | 5,65E-05 |
| FSD1      | 3,988371 | 4,17E-08 |
| CREB3L4   | 3,980307 | 9,59E-40 |
| MTUS1     | 3,98025  | 3,41E-38 |

|          |          |          |
|----------|----------|----------|
| ISM1     | 3,976567 | 1,83E-07 |
| ZNF554   | 3,976508 | 3,49E-07 |
| DLL1     | 3,975002 | 7,79E-05 |
| PIK3C2B  | 3,960614 | 3,47E-42 |
| JAM2     | 3,959632 | 0,000352 |
| KIAA1324 | 3,958033 | 6,95E-15 |
| ALDH4A1  | 3,955705 | 5,38E-13 |
| KIFC2    | 3,955485 | 2,59E-29 |
| PALM3    | 3,9522   | 2,33E-05 |
| ZNF385A  | 3,950695 | 1,03E-56 |
| INHBB    | 3,944276 | 6,51E-09 |
| ZNF204P  | 3,94091  | 3,21E-06 |
| HAGHL    | 3,938422 | 1,73E-21 |
| ZNF48    | 3,932605 | 2,33E-17 |
| LIPT2    | 3,928181 | 3,51E-09 |
| KCNK6    | 3,927264 | 1,80E-13 |
| DOK4     | 3,92708  | 2,76E-23 |
| C3orf14  | 3,920241 | 4,26E-45 |
| ZBED6CL  | 3,916398 | 0,000462 |
| TUBB4A   | 3,915554 | 7,51E-07 |
| GLUD2    | 3,909687 | 7,64E-14 |
| HOXC-AS3 | 3,909417 | 0,000814 |
| TP53     | 3,907762 | 5,12E-35 |
| PRDX2    | 3,906912 | 1,45E-75 |
| PROCA1   | 3,901501 | 2,44E-05 |
| TMPRSS2  | 3,89875  | 5,88E-05 |
| EFEMP1   | 3,898045 | 3,24E-57 |
| DYNC1I1  | 3,894529 | 6,33E-37 |
| ZNF737   | 3,885203 | 2,35E-14 |
| CBS      | 3,88321  | 1,36E-21 |
| RGAG4    | 3,882523 | 7,76E-07 |
| FRMD4B   | 3,882365 | 3,24E-05 |
| AGAP2    | 3,881316 | 4,16E-16 |
| SH3GL3   | 3,879884 | 1,04E-05 |
| OLFM2    | 3,877211 | 4,40E-30 |
| FHDC1    | 3,873453 | 1,16E-11 |
| IDUA     | 3,870702 | 1,09E-11 |
| TMEM229E | 3,858512 | 2,85E-06 |
| RALGPS1  | 3,858468 | 4,34E-12 |
| C17orf96 | 3,821624 | 5,26E-38 |
| TSPAN13  | 3,819946 | 2,15E-42 |
| KCNJ8    | 3,818901 | 2,99E-25 |
| JPH1     | 3,815418 | 2,51E-10 |
| SCAMP5   | 3,810859 | 2,18E-15 |
| NBEAL2   | 3,809646 | 2,02E-26 |
| EPS8L2   | 3,793789 | 6,95E-21 |
| ZNF793   | 3,785283 | 1,07E-16 |
| TCHH     | 3,77985  | 0,000502 |
| MGAT4A   | 3,77425  | 6,83E-15 |
| PLCG2    | 3,769274 | 5,14E-18 |

|           |          |           |
|-----------|----------|-----------|
| NCOA3     | 3,765591 | 3,33E-57  |
| CEL       | 3,764773 | 0,000412  |
| PTPRG-AS1 | 3,760699 | 4,85E-09  |
| MPP7      | 3,752157 | 3,41E-33  |
| SIAE      | 3,748566 | 2,65E-23  |
| SORT1     | 3,744569 | 1,15E-35  |
| SREBF1    | 3,741134 | 7,75E-48  |
| SPATA17   | 3,739926 | 4,15E-10  |
| KIAA0040  | 3,737245 | 1,27E-15  |
| ASAH2     | 3,737019 | 2,09E-15  |
| MFSD3     | 3,733817 | 6,86E-23  |
| PPM1D     | 3,733174 | 2,30E-50  |
| CYBA      | 3,729792 | 1,02E-50  |
| SEPT1     | 3,729676 | 1,72E-07  |
| GSTM3     | 3,727438 | 6,80E-15  |
| ONECUT1   | 3,71951  | 0,000317  |
| HSD3B7    | 3,719388 | 1,27E-35  |
| VGf       | 3,715256 | 4,78E-16  |
| PHLPP1    | 3,714968 | 6,43E-35  |
| FAM86C2P  | 3,712518 | 6,98E-11  |
| TRIM37    | 3,702672 | 4,57E-102 |
| BAMBI     | 3,702493 | 1,29E-83  |
| RCOR2     | 3,692093 | 5,59E-12  |
| CCDC113   | 3,681156 | 7,27E-05  |
| STMN3     | 3,6771   | 6,93E-24  |
| ARHGAP4   | 3,676746 | 7,78E-07  |
| RPS6KL1   | 3,672593 | 9,38E-12  |
| C10orf35  | 3,662996 | 2,33E-11  |
| HEYL      | 3,650698 | 0,000203  |
| FRAT1     | 3,643884 | 0,000301  |
| GCH1      | 3,641799 | 2,40E-20  |
| SALL2     | 3,640196 | 2,33E-22  |
| GSTM4     | 3,632268 | 3,89E-30  |
| PLEKHG1   | 3,632138 | 2,69E-07  |
| SH3YL1    | 3,620881 | 1,91E-29  |
| GRHL1     | 3,619196 | 4,36E-07  |
| LCA5L     | 3,597153 | 0,000135  |
| SLC15A2   | 3,590664 | 0,000223  |
| CRMP1     | 3,589936 | 7,09E-08  |
| GFRA1     | 3,589909 | 4,63E-25  |
| FIRRE     | 3,575327 | 1,80E-05  |
| ATHL1     | 3,574632 | 1,51E-05  |
| TGFBR3L   | 3,564776 | 8,19E-07  |
| BBS2      | 3,561155 | 4,38E-16  |
| PRR5      | 3,560064 | 7,70E-10  |
| BOLA1     | 3,551888 | 8,58E-28  |
| PBX1      | 3,548846 | 1,35E-12  |
| CACNA1H   | 3,541923 | 8,93E-41  |
| OSR2      | 3,539272 | 1,83E-07  |
| VPS37D    | 3,537172 | 2,53E-05  |

|            |          |          |
|------------|----------|----------|
| RINL       | 3,53272  | 3,38E-06 |
| NAAA       | 3,531647 | 1,61E-18 |
| EGLN3      | 3,530178 | 8,51E-06 |
| NEURL1B    | 3,529009 | 1,35E-25 |
| TP53INP1   | 3,523578 | 5,41E-09 |
| SLC7A2     | 3,521774 | 3,81E-36 |
| CASZ1      | 3,521165 | 1,88E-18 |
| FAM78A     | 3,520008 | 0,000615 |
| ERV3-1     | 3,519024 | 1,25E-21 |
| LOC101927  | 3,517277 | 3,32E-09 |
| ZFP14      | 3,512765 | 1,45E-08 |
| GDPD1      | 3,511466 | 6,49E-06 |
| GPR160     | 3,508119 | 9,13E-13 |
| MYH7B      | 3,505632 | 0,000334 |
| C1orf233   | 3,505392 | 7,12E-32 |
| SLC37A4    | 3,500777 | 5,07E-26 |
| ZCWPW1     | 3,500593 | 2,08E-10 |
| BCAM       | 3,500114 | 1,46E-30 |
| LAMA3      | 3,496438 | 3,87E-12 |
| BRSK1      | 3,495453 | 2,92E-10 |
| CCDC74A    | 3,492653 | 6,70E-06 |
| SAMD12     | 3,491229 | 2,24E-11 |
| PGAP2      | 3,488295 | 2,12E-28 |
| ZNF443     | 3,488164 | 3,00E-12 |
| ZNF860     | 3,482466 | 3,55E-05 |
| ZNF311     | 3,477321 | 0,000239 |
| TMEM154    | 3,465695 | 0,000332 |
| TNS1       | 3,462473 | 4,15E-08 |
| TINCR      | 3,461212 | 3,21E-05 |
| RMND5B     | 3,460782 | 6,37E-43 |
| GPC2       | 3,459063 | 2,43E-06 |
| BMP2       | 3,443976 | 1,35E-31 |
| CITED4     | 3,43842  | 6,77E-05 |
| ANKRD18B   | 3,4383   | 4,66E-08 |
| SLC24A1    | 3,431104 | 2,27E-19 |
| KCNH3      | 3,427806 | 0,0006   |
| DOC2A      | 3,426183 | 8,11E-06 |
| GUCY1A3    | 3,423913 | 5,89E-15 |
| LRP5       | 3,421335 | 2,69E-59 |
| LOC339862  | 3,417703 | 8,35E-06 |
| ACTG2      | 3,417346 | 0,000539 |
| RPL39L     | 3,415582 | 1,34E-27 |
| FAM227B    | 3,415172 | 2,26E-11 |
| NDRG2      | 3,402297 | 9,63E-12 |
| PCDHB13    | 3,40222  | 2,10E-13 |
| PRICKLE2-A | 3,397186 | 0,000103 |
| METRNL     | 3,391093 | 2,33E-29 |
| PDCD4      | 3,382    | 3,39E-35 |
| TPD52      | 3,381861 | 2,56E-35 |
| ZNF287     | 3,375658 | 2,34E-07 |



|           |          |          |
|-----------|----------|----------|
| ALDH6A1   | 3,371426 | 6,48E-38 |
| CASKIN1   | 3,36947  | 2,83E-13 |
| RHPN1-AS1 | 3,368878 | 0,000192 |
| CABYR     | 3,367216 | 1,10E-07 |
| ZCCHC12   | 3,362867 | 6,18E-05 |
| USP32     | 3,360569 | 1,26E-28 |
| TRPM4     | 3,35615  | 5,52E-24 |
| LENG9     | 3,346232 | 4,69E-18 |
| MDK       | 3,34433  | 1,42E-54 |
| TLCD2     | 3,33986  | 2,29E-08 |
| AKTIP     | 3,32044  | 1,39E-22 |
| DHTKD1    | 3,319216 | 5,50E-46 |
| LHPP      | 3,316584 | 8,74E-14 |
| PACS2     | 3,313253 | 6,60E-43 |
| EFNA2     | 3,309908 | 0,000484 |
| JMY       | 3,300897 | 2,97E-08 |
| ZNF219    | 3,300032 | 1,26E-21 |
| ARFGEF3   | 3,297298 | 6,80E-14 |
| ERICH2    | 3,287124 | 3,14E-13 |
| SH3GLB2   | 3,285931 | 2,73E-40 |
| TLCD1     | 3,285004 | 7,62E-31 |
| DNMT3B    | 3,280487 | 2,33E-32 |
| SYNGR2    | 3,276716 | 1,52E-24 |
| WASF3     | 3,276466 | 4,05E-17 |
| HIST3H2A  | 3,274164 | 5,65E-08 |
| PCAT7     | 3,27284  | 0,000169 |
| DAAM1     | 3,271013 | 3,59E-22 |
| ZNF397    | 3,262968 | 2,39E-17 |
| CCDC24    | 3,262652 | 5,53E-06 |
| PSD4      | 3,26213  | 5,53E-25 |
| OLMALINC  | 3,253451 | 6,41E-12 |
| USP43     | 3,2519   | 3,57E-07 |
| RAP1GAP   | 3,250463 | 1,08E-08 |
| GLIDR     | 3,243191 | 1,42E-05 |
| ZNF329    | 3,243104 | 1,64E-12 |
| ISG20     | 3,240825 | 0,000602 |
| TRIM24    | 3,237319 | 2,14E-42 |
| SHF       | 3,230161 | 2,56E-08 |
| C5        | 3,227935 | 6,08E-09 |
| WNT7B     | 3,220912 | 4,52E-11 |
| ZDHHC24   | 3,219684 | 2,39E-11 |
| SUV420H2  | 3,212977 | 1,87E-13 |
| CYP2J2    | 3,211534 | 4,85E-11 |
| TMTC2     | 3,210446 | 3,27E-10 |
| PGM2L1    | 3,209226 | 7,33E-22 |
| LOC100996 | 3,201696 | 5,75E-06 |
| MOSPD3    | 3,200444 | 1,14E-15 |
| GAD1      | 3,199791 | 5,42E-13 |
| RMI2      | 3,188307 | 4,57E-17 |
| APRT      | 3,186623 | 1,18E-68 |

|          |          |          |
|----------|----------|----------|
| APPBP2   | 3,185957 | 1,43E-41 |
| SYT1     | 3,180869 | 1,58E-11 |
| AMOT     | 3,176284 | 9,59E-23 |
| GATSL3   | 3,170654 | 4,91E-05 |
| LRRC73   | 3,167136 | 2,86E-06 |
| TFAP2A   | 3,16382  | 1,14E-60 |
| LRRC24   | 3,163703 | 6,38E-06 |
| RNF44    | 3,161581 | 4,68E-40 |
| SSH3     | 3,153327 | 7,35E-24 |
| HCG11    | 3,152104 | 1,51E-09 |
| BRIP1    | 3,142944 | 3,15E-47 |
| RB1      | 3,139358 | 1,17E-17 |
| THNSL2   | 3,136891 | 5,95E-10 |
| CD9      | 3,122986 | 1,70E-35 |
| MEX3A    | 3,122893 | 2,10E-50 |
| MARCH9   | 3,119395 | 8,58E-20 |
| C1orf116 | 3,117685 | 0,00092  |
| MPND     | 3,116772 | 2,96E-18 |
| USP18    | 3,115994 | 1,36E-08 |
| MACC1    | 3,115723 | 0,000639 |
| COL9A2   | 3,113186 | 1,44E-08 |
| B3GNT4   | 3,106236 | 0,000638 |
| PODXL2   | 3,106032 | 9,64E-34 |
| ATP6V1E2 | 3,10342  | 4,81E-08 |
| EFHD1    | 3,102404 | 1,25E-09 |
| SPSB4    | 3,102099 | 0,000493 |
| HEATR6   | 3,094853 | 3,76E-54 |
| GSE1     | 3,070245 | 1,91E-65 |
| SPATA2L  | 3,069449 | 1,26E-22 |
| ASNS     | 3,068524 | 2,09E-14 |
| SLC2A11  | 3,068289 | 7,42E-13 |
| DUS4L    | 3,063131 | 1,84E-23 |
| PSMD6    | 3,059933 | 6,08E-49 |
| TDRKH    | 3,056885 | 2,13E-14 |
| THAP9    | 3,047331 | 0,000143 |
| PSTPIP2  | 3,042228 | 1,18E-14 |
| MAP3K9   | 3,037207 | 5,01E-21 |
| GAB2     | 3,035133 | 2,18E-11 |
| NMB      | 3,030343 | 2,12E-13 |
| CELSR3   | 3,026715 | 3,09E-15 |
| EPS8L1   | 3,024499 | 7,65E-08 |
| EDA2R    | 3,02407  | 0,000122 |
| LCP1     | 3,020039 | 6,90E-09 |
| BAIAP3   | 3,017077 | 9,86E-05 |
| CD24     | 3,016522 | 8,40E-35 |
| ADSSL1   | 3,012331 | 0,000723 |
| DNPH1    | 3,011221 | 1,49E-42 |
| ACSS1    | 3,011059 | 4,07E-06 |
| RTN4R    | 3,003009 | 3,78E-08 |
| MOAP1    | 3,001403 | 5,68E-18 |

|           |          |          |
|-----------|----------|----------|
| SCD       | 3,000034 | 1,20E-62 |
| ITPK1     | 2,998252 | 4,57E-45 |
| C16orf46  | 2,998033 | 2,73E-09 |
| HOMER2    | 2,996591 | 1,63E-34 |
| TBC1D9    | 2,995385 | 2,77E-31 |
| LRRC8B    | 2,993984 | 2,71E-20 |
| MEIS3     | 2,976854 | 4,82E-05 |
| C1orf226  | 2,975763 | 4,64E-05 |
| ZNF347    | 2,97543  | 3,31E-08 |
| MREG      | 2,973183 | 8,06E-20 |
| IQCH-AS1  | 2,971418 | 2,59E-12 |
| ALKBH2    | 2,970535 | 3,14E-25 |
| TMEM254   | 2,966261 | 6,27E-18 |
| TMEM132   | 2,964082 | 7,98E-17 |
| ARHGEF19  | 2,957853 | 1,98E-11 |
| TMEM141   | 2,956929 | 5,32E-39 |
| PCK2      | 2,955989 | 2,94E-07 |
| LOC284023 | 2,95585  | 0,000782 |
| PAN2      | 2,952552 | 1,79E-06 |
| PQLC3     | 2,951952 | 3,79E-11 |
| NHS       | 2,951413 | 4,22E-08 |
| SEMA3F    | 2,946458 | 5,19E-22 |
| SNHG9     | 2,946383 | 0,000427 |
| SMIM14    | 2,946186 | 5,67E-07 |
| LHX4      | 2,943774 | 6,40E-22 |
| VSIG10L   | 2,9434   | 1,67E-08 |
| BBC3      | 2,942846 | 1,18E-09 |
| DHRS13    | 2,939547 | 5,79E-17 |
| PPP1R13B  | 2,93659  | 6,10E-22 |
| LNX2      | 2,931609 | 1,93E-26 |
| ARF5      | 2,926053 | 6,36E-45 |
| IGFBP5    | 2,919536 | 2,18E-13 |
| MEPCE     | 2,919533 | 1,66E-64 |
| PPDPF     | 2,91402  | 3,00E-41 |
| ZNF799    | 2,910756 | 3,65E-05 |
| CA11      | 2,90839  | 0,000751 |
| PPM1L     | 2,906251 | 2,27E-06 |
| SLC22A18  | 2,899796 | 5,74E-11 |
| CPLX1     | 2,899548 | 9,36E-08 |
| LOC645513 | 2,886863 | 1,84E-06 |
| C20orf96  | 2,884477 | 6,11E-06 |
| C9orf116  | 2,867544 | 2,11E-09 |
| ZNF43     | 2,86594  | 6,99E-29 |
| THBS3     | 2,865464 | 9,77E-08 |
| CCDC121   | 2,864713 | 3,83E-05 |
| HIST1H2BD | 2,864074 | 2,74E-07 |
| PAQR4     | 2,859677 | 3,51E-48 |
| SLC16A13  | 2,857827 | 2,93E-08 |
| IMPA2     | 2,852908 | 2,14E-23 |
| EXD2      | 2,85174  | 3,06E-34 |

|           |          |          |
|-----------|----------|----------|
| CCNG2     | 2,846286 | 3,62E-09 |
| ZNF217    | 2,842716 | 4,05E-34 |
| RASSF2    | 2,839258 | 0,000152 |
| ERMARD    | 2,838391 | 8,45E-10 |
| RAD51C    | 2,837551 | 2,86E-39 |
| RAB30     | 2,828326 | 1,40E-15 |
| ADAM15    | 2,823849 | 5,06E-44 |
| PI4K2B    | 2,82378  | 2,71E-16 |
| FAM171A2  | 2,821379 | 1,87E-25 |
| SIAH2     | 2,815622 | 1,72E-27 |
| ZNF425    | 2,807035 | 5,37E-12 |
| DTWD1     | 2,806669 | 2,18E-18 |
| PFDN4     | 2,796228 | 8,93E-41 |
| DNASE2    | 2,793924 | 1,03E-28 |
| PCDHA7    | 2,792683 | 0,000222 |
| HCFC1R1   | 2,791878 | 1,59E-19 |
| TRPT1     | 2,790439 | 1,59E-13 |
| TMEM170F  | 2,787093 | 4,50E-06 |
| LOC100233 | 2,786533 | 9,72E-06 |
| B4GALNT4  | 2,784012 | 8,04E-11 |
| CACFD1    | 2,773756 | 1,01E-14 |
| ZNF354A   | 2,773344 | 3,23E-16 |
| KRT7      | 2,770591 | 0,00017  |
| SH3BP5    | 2,769539 | 3,07E-38 |
| ZNF33B    | 2,769071 | 7,56E-16 |
| SLC39A4   | 2,768749 | 6,34E-17 |
| TRAPPC9   | 2,768691 | 2,57E-14 |
| APOE      | 2,765318 | 0,000173 |
| STK32C    | 2,765146 | 6,76E-14 |
| PAQR8     | 2,764043 | 6,17E-08 |
| PLXNB1    | 2,761175 | 2,42E-16 |
| TUBD1     | 2,760993 | 7,56E-16 |
| MSX2      | 2,757377 | 1,23E-16 |
| CHCHD5    | 2,754531 | 6,90E-15 |
| COMTD1    | 2,749623 | 1,35E-20 |
| MLLT3     | 2,749575 | 2,90E-09 |
| MAN2B1    | 2,748986 | 1,71E-25 |
| PLEKHF2   | 2,745576 | 9,57E-30 |
| ZNF497    | 2,743875 | 0,000136 |
| NOTCH1    | 2,736793 | 8,66E-41 |
| CCNO      | 2,727183 | 1,23E-06 |
| LRRC20    | 2,721543 | 1,02E-08 |
| ACOT4     | 2,715962 | 5,63E-05 |
| FLJ23867  | 2,715659 | 1,57E-13 |
| DHCR7     | 2,715245 | 4,13E-22 |
| TNFRSF19  | 2,708826 | 9,66E-26 |
| ANKIB1    | 2,70353  | 2,10E-35 |
| ZNF836    | 2,700808 | 7,96E-09 |
| NR1H3     | 2,698818 | 1,38E-06 |
| ZNF391    | 2,698801 | 1,42E-05 |

|           |          |          |
|-----------|----------|----------|
| SLC25A23  | 2,696868 | 2,22E-13 |
| TFAP2C    | 2,693958 | 1,06E-25 |
| SLC47A1   | 2,693937 | 0,000131 |
| ZC3H6     | 2,687605 | 9,37E-09 |
| AP1S1     | 2,686875 | 6,07E-16 |
| RPS6KB1   | 2,685357 | 5,68E-54 |
| ZNF253    | 2,68384  | 9,68E-23 |
| FAM213B   | 2,680266 | 8,71E-15 |
| FGF12     | 2,676728 | 7,56E-07 |
| MMAB      | 2,676188 | 5,04E-35 |
| CYP51A1   | 2,672525 | 1,63E-46 |
| PITPNC1   | 2,670276 | 4,63E-37 |
| NXPH4     | 2,669331 | 1,53E-19 |
| RHBDF1    | 2,668326 | 3,25E-13 |
| C16orf74  | 2,666871 | 1,96E-05 |
| PTPRU     | 2,663977 | 4,31E-16 |
| BTBD11    | 2,662652 | 0,000118 |
| ZNF525    | 2,660633 | 1,15E-15 |
| C21orf33  | 2,66014  | 2,23E-20 |
| ZNF620    | 2,658566 | 1,01E-09 |
| GOLGA2P7  | 2,658339 | 5,36E-07 |
| CLU       | 2,657316 | 2,26E-11 |
| FAM102B   | 2,656839 | 2,34E-28 |
| AP4M1     | 2,652934 | 1,98E-17 |
| ACVR2B    | 2,650949 | 2,39E-07 |
| MYCL      | 2,650312 | 6,55E-05 |
| AR        | 2,649434 | 4,13E-09 |
| NANOS1    | 2,646529 | 5,90E-15 |
| GATAD1    | 2,644443 | 3,92E-17 |
| PCBD1     | 2,642522 | 7,36E-27 |
| SNHG5     | 2,641256 | 3,24E-09 |
| ZNF736    | 2,640936 | 2,94E-13 |
| PRMT6     | 2,640198 | 2,59E-36 |
| C14orf28  | 2,640161 | 9,98E-05 |
| PSMG3-AS1 | 2,639537 | 4,47E-09 |
| NIPSNAP1  | 2,638794 | 2,59E-31 |
| SOCS1     | 2,638756 | 5,68E-05 |
| GALNT16   | 2,635999 | 0,000775 |
| COBLL1    | 2,635989 | 6,47E-14 |
| ABLIM1    | 2,635893 | 3,78E-19 |
| CIART     | 2,635165 | 2,30E-08 |
| TYSND1    | 2,63342  | 2,80E-26 |
| DHRS12    | 2,630791 | 1,00E-05 |
| NME3      | 2,63004  | 9,49E-09 |
| RMND5A    | 2,624094 | 1,37E-22 |
| CMTM4     | 2,623173 | 1,65E-31 |
| ATP7B     | 2,622214 | 0,000457 |
| ZFP3      | 2,620007 | 8,41E-08 |
| KLC3      | 2,618862 | 0,000352 |
| GPRC5C    | 2,616087 | 9,17E-13 |

|           |          |          |
|-----------|----------|----------|
| NIPAL1    | 2,612584 | 0,000611 |
| CCDC120   | 2,612527 | 2,29E-08 |
| ARHGAP27  | 2,610202 | 1,12E-12 |
| PRKX      | 2,607039 | 3,14E-16 |
| LOC729218 | 2,605968 | 1,99E-05 |
| KBTBD7    | 2,604204 | 5,48E-12 |
| CTPS2     | 2,603418 | 7,29E-23 |
| JHDM1D-A  | 2,59681  | 2,40E-09 |
| MARCH2    | 2,595806 | 5,02E-07 |
| IRX5      | 2,593569 | 4,89E-18 |
| NKD1      | 2,592509 | 3,54E-21 |
| SDC3      | 2,590638 | 2,82E-15 |
| ARMC10    | 2,589766 | 3,73E-32 |
| CARF      | 2,588392 | 0,000141 |
| GCA       | 2,576913 | 2,86E-12 |
| FBXW4     | 2,575333 | 7,18E-22 |
| ZNF286B   | 2,574386 | 3,83E-06 |
| THNSL1    | 2,572089 | 3,49E-21 |
| NHP2      | 2,571124 | 4,29E-49 |
| IDH2      | 2,5684   | 2,52E-43 |
| LINC00665 | 2,564591 | 1,40E-12 |
| PHF10     | 2,563501 | 2,64E-19 |
| FZD3      | 2,562939 | 3,14E-08 |
| ASNA1     | 2,562073 | 4,64E-35 |
| RALGAPA1  | 2,561042 | 1,92E-19 |
| LOC101928 | 2,560598 | 0,000612 |
| EFNA4     | 2,557189 | 5,38E-22 |
| DGKE      | 2,554872 | 5,21E-08 |
| ATG16L2   | 2,553907 | 0,000287 |
| ATXN7L3B  | 2,550695 | 8,58E-41 |
| HOXC11    | 2,546662 | 2,65E-06 |
| TMTC4     | 2,543358 | 6,23E-12 |
| NUDT14    | 2,543045 | 9,44E-19 |
| TSNARE1   | 2,542798 | 8,68E-06 |
| ETNK2     | 2,539932 | 2,10E-09 |
| RALGDS    | 2,534513 | 9,05E-15 |
| NMU       | 2,533225 | 1,88E-05 |
| HIST2H2BE | 2,533049 | 1,75E-07 |
| NR4A1     | 2,532517 | 1,34E-06 |
| SOX13     | 2,530278 | 1,67E-10 |
| SYNE2     | 2,528506 | 3,22E-19 |
| IMMP2L    | 2,524579 | 7,10E-08 |
| ANKRD34A  | 2,523667 | 3,57E-09 |
| THOC6     | 2,523174 | 5,70E-09 |
| DUSP2     | 2,513408 | 9,44E-05 |
| LRBA      | 2,511847 | 8,08E-18 |
| KCTD1     | 2,509268 | 8,00E-13 |
| INADL     | 2,507357 | 1,76E-20 |
| TMEM184   | 2,505825 | 1,27E-09 |
| MGST2     | 2,503656 | 1,42E-07 |

|          |          |          |
|----------|----------|----------|
| EPB41L5  | 2,502738 | 6,76E-25 |
| CCND1    | 2,501926 | 9,18E-23 |
| GRIP1    | 2,501557 | 3,92E-06 |
| FLJ10038 | 2,499819 | 4,36E-11 |
| ZNF74    | 2,496784 | 9,45E-18 |
| FUK      | 2,494556 | 4,64E-07 |
| TMEM231  | 2,492532 | 2,31E-11 |
| BCL2L1   | 2,492423 | 6,91E-17 |
| LPIN3    | 2,487283 | 9,65E-14 |
| RPL17    | 2,476115 | 4,20E-11 |
| SAPCD2   | 2,475548 | 1,55E-17 |
| DOPEY2   | 2,47507  | 2,15E-21 |
| TSPAN14  | 2,473843 | 5,75E-21 |
| SLC29A3  | 2,473    | 1,32E-06 |
| KIF16B   | 2,471875 | 4,74E-07 |
| KRIT1    | 2,470855 | 2,04E-21 |
| KIAA1958 | 2,470012 | 1,45E-14 |
| ZFP62    | 2,467946 | 1,15E-29 |
| NUDT3    | 2,46789  | 1,79E-11 |
| SLC4A8   | 2,467699 | 0,000426 |
| PTPRF    | 2,462745 | 8,29E-32 |
| FITM2    | 2,462649 | 1,04E-10 |
| ZNF33A   | 2,459326 | 3,09E-22 |
| HILPDA   | 2,457827 | 2,40E-14 |
| IDH1     | 2,452268 | 1,43E-32 |
| CHD6     | 2,445018 | 5,37E-19 |
| XBP1     | 2,443145 | 3,19E-09 |
| UNC93B1  | 2,442622 | 9,26E-17 |
| PYCARD   | 2,441698 | 1,85E-09 |
| ANKRD13B | 2,440941 | 6,99E-19 |
| FAM221A  | 2,437263 | 0,000393 |
| SBF2-AS1 | 2,435412 | 6,03E-05 |
| MAP2K6   | 2,42488  | 2,65E-05 |
| DECR2    | 2,421561 | 1,76E-15 |
| SLC29A4  | 2,420967 | 1,20E-14 |
| PRPF40B  | 2,420561 | 7,29E-09 |
| ECI1     | 2,41686  | 7,37E-29 |
| TRIM33   | 2,416377 | 3,00E-24 |
| DSC2     | 2,413805 | 1,52E-23 |
| RAB33B   | 2,413183 | 1,48E-07 |
| KIAA1211 | 2,411958 | 2,37E-10 |
| H2AFX    | 2,409042 | 1,12E-39 |
| PRKAR2B  | 2,406566 | 5,95E-06 |
| NEK8     | 2,404945 | 0,000314 |
| PCYOX1L  | 2,404623 | 6,95E-09 |
| MTERF1   | 2,404232 | 3,60E-10 |
| PRRT3    | 2,404216 | 0,000469 |
| OBFC1    | 2,402658 | 8,78E-10 |
| CUX1     | 2,402645 | 1,05E-28 |
| WRB      | 2,40247  | 3,22E-13 |

|           |          |          |
|-----------|----------|----------|
| MYB       | 2,401653 | 0,001007 |
| ZHX2      | 2,398241 | 4,18E-14 |
| ZNF117    | 2,396171 | 3,14E-13 |
| PDZD4     | 2,39564  | 1,37E-06 |
| TEAD2     | 2,395486 | 1,05E-17 |
| DUSP8     | 2,393882 | 4,91E-05 |
| DDB2      | 2,388354 | 2,70E-09 |
| HYKK      | 2,386481 | 0,000918 |
| FIS1      | 2,380999 | 6,56E-29 |
| ZNF433    | 2,380529 | 7,19E-08 |
| MAPK11    | 2,379392 | 2,13E-05 |
| LINC00886 | 2,377127 | 0,000159 |
| IFT22     | 2,375835 | 9,89E-26 |
| SALL4     | 2,374744 | 8,24E-05 |
| JUND      | 2,372224 | 7,17E-12 |
| SCAMP1    | 2,371945 | 2,08E-18 |
| SLC25A40  | 2,371444 | 1,15E-10 |
| IQCK      | 2,371088 | 2,46E-10 |
| MMP15     | 2,370882 | 9,07E-13 |
| RAC3      | 2,370323 | 1,14E-14 |
| ZNF879    | 2,367183 | 0,000395 |
| TRIM36    | 2,363002 | 7,45E-10 |
| TMEM116   | 2,361588 | 1,04E-05 |
| TMEM54    | 2,361434 | 1,63E-15 |
| GMCL1     | 2,35655  | 4,64E-12 |
| H2AFY2    | 2,355861 | 1,50E-15 |
| HDDC3     | 2,34888  | 7,99E-14 |
| DYM       | 2,348617 | 2,55E-24 |
| LAMTOR4   | 2,34264  | 4,28E-25 |
| FAM185A   | 2,340786 | 6,82E-09 |
| TSPAN31   | 2,339792 | 2,70E-07 |
| ZSCAN21   | 2,336758 | 1,13E-17 |
| CUL7      | 2,336587 | 1,24E-14 |
| DPP7      | 2,330094 | 4,86E-27 |
| ABCA7     | 2,329972 | 3,06E-06 |
| IFT140    | 2,329708 | 6,58E-07 |
| PODXL     | 2,328166 | 1,58E-17 |
| TGIF1     | 2,327117 | 5,31E-14 |
| FAM86EP   | 2,325164 | 5,02E-06 |
| SEZ6L2    | 2,321717 | 3,24E-12 |
| ADPRHL1   | 2,321332 | 5,99E-09 |
| ZFP90     | 2,321214 | 2,91E-16 |
| ZC3H8     | 2,318695 | 1,02E-07 |
| GTPBP10   | 2,318173 | 4,75E-15 |
| TUBA1A    | 2,317211 | 1,33E-29 |
| ZKSCAN1   | 2,31568  | 8,95E-28 |
| MBNL3     | 2,307545 | 6,11E-12 |
| GALK1     | 2,307185 | 1,01E-17 |
| C1QTNF9B  | 2,307011 | 1,15E-05 |
| TCEA2     | 2,305845 | 7,99E-09 |



|           |          |          |
|-----------|----------|----------|
| MAPK8IP2  | 2,304389 | 8,75E-05 |
| TMEM87B   | 2,30102  | 4,52E-14 |
| BCAS4     | 2,300165 | 2,86E-07 |
| OARD1     | 2,297713 | 3,92E-14 |
| ZNF786    | 2,297652 | 2,42E-18 |
| SLC7A5    | 2,2914   | 2,84E-30 |
| DUSP9     | 2,290664 | 3,09E-05 |
| SLC25A29  | 2,289634 | 7,71E-19 |
| ATG10     | 2,288009 | 1,21E-09 |
| H2AFJ     | 2,287956 | 1,11E-12 |
| MSRB2     | 2,287851 | 7,69E-18 |
| PTGR2     | 2,286797 | 1,98E-10 |
| EFR3B     | 2,283129 | 5,53E-10 |
| PCDHB8    | 2,282386 | 9,54E-11 |
| ATP8B1    | 2,281898 | 7,98E-16 |
| TMEM198E  | 2,28122  | 2,80E-05 |
| WWOX      | 2,281003 | 1,20E-13 |
| FECH      | 2,279936 | 1,29E-05 |
| ZNF839    | 2,278965 | 5,46E-09 |
| PALM      | 2,273402 | 4,03E-08 |
| FAM117A   | 2,273284 | 6,50E-10 |
| ZNF3      | 2,273077 | 2,23E-24 |
| LONRF1    | 2,272944 | 7,24E-08 |
| ZNF184    | 2,272674 | 4,14E-17 |
| ATP6V1C2  | 2,272078 | 1,36E-07 |
| P2RX4     | 2,271419 | 7,71E-18 |
| TNFAIP8L1 | 2,270344 | 3,63E-07 |
| SMARCD2   | 2,268583 | 1,02E-26 |
| ABHD11    | 2,263761 | 6,73E-16 |
| DDAH2     | 2,26259  | 1,18E-17 |
| OBSCN     | 2,257052 | 1,85E-05 |
| ZNF652    | 2,254577 | 3,09E-21 |
| ZBTB12    | 2,25435  | 1,91E-06 |
| PRDX5     | 2,251075 | 2,22E-36 |
| GRAMD4    | 2,250362 | 6,29E-06 |
| PIK3R3    | 2,249706 | 9,80E-10 |
| HIST1H2BK | 2,248168 | 3,11E-05 |
| MAFIP     | 2,248163 | 8,80E-07 |
| GPR27     | 2,246181 | 0,000667 |
| RTKN      | 2,244324 | 5,63E-13 |
| ENTPD5    | 2,243949 | 1,53E-07 |
| THSD4     | 2,240914 | 7,97E-08 |
| SIRT5     | 2,239556 | 1,82E-14 |
| CECR5     | 2,238754 | 7,60E-24 |
| IGFLR1    | 2,238747 | 2,43E-05 |
| EVL       | 2,236433 | 2,10E-18 |
| TRIB1     | 2,23457  | 2,64E-12 |
| TMCO6     | 2,231896 | 5,44E-07 |
| FBXW9     | 2,229421 | 1,96E-11 |
| GAMT      | 2,226624 | 1,48E-11 |

|           |          |          |
|-----------|----------|----------|
| MDM2      | 2,225816 | 3,76E-09 |
| WDR24     | 2,222755 | 8,11E-09 |
| PHKA1     | 2,221661 | 2,15E-07 |
| TRPS1     | 2,220883 | 3,62E-22 |
| CBX2      | 2,217371 | 8,00E-25 |
| ZNF114    | 2,216568 | 3,90E-09 |
| GATSL2    | 2,215509 | 3,28E-19 |
| LOC100506 | 2,214319 | 3,81E-05 |
| EPHB4     | 2,213832 | 1,95E-34 |
| PREX1     | 2,213316 | 7,08E-19 |
| NADSYN1   | 2,212743 | 5,45E-15 |
| GCDH      | 2,212438 | 4,51E-18 |
| GPT2      | 2,211957 | 6,19E-06 |
| CPNE3     | 2,211156 | 1,50E-20 |
| MAP3K14-1 | 2,206722 | 0,00035  |
| CEMIP     | 2,206581 | 9,98E-07 |
| DBP       | 2,206097 | 5,94E-11 |
| ZNF813    | 2,197734 | 1,69E-07 |
| LTBP4     | 2,196821 | 5,64E-10 |
| PEMT      | 2,192313 | 9,98E-18 |
| SLC39A11  | 2,191716 | 1,82E-07 |
| L2HGDH    | 2,191514 | 9,64E-14 |
| ZNF517    | 2,187403 | 0,000551 |
| ENOSF1    | 2,187311 | 9,92E-15 |
| LRRC23    | 2,185248 | 0,000538 |
| CXADR     | 2,185136 | 8,10E-09 |
| SPPL2A    | 2,184598 | 4,46E-23 |
| DPP3      | 2,184258 | 1,05E-15 |
| RNF157    | 2,183741 | 0,000168 |
| SPTLC2    | 2,183715 | 1,91E-20 |
| S100A16   | 2,183319 | 1,68E-10 |
| CROT      | 2,178706 | 0,00048  |
| JOSD2     | 2,176924 | 1,99E-06 |
| MED12L    | 2,174542 | 5,60E-05 |
| TMEM183F  | 2,173988 | 2,82E-07 |
| LYPLAL1   | 2,17268  | 3,89E-08 |
| TMEM159   | 2,171748 | 2,44E-09 |
| TBCK      | 2,171619 | 4,82E-14 |
| SLCO4A1   | 2,169869 | 7,91E-06 |
| SERINC5   | 2,168557 | 1,63E-10 |
| NMRAL1    | 2,163633 | 1,97E-21 |
| SFI1      | 2,160392 | 3,42E-06 |
| TMEM205   | 2,160051 | 4,13E-14 |
| TMBIM4    | 2,158273 | 8,15E-14 |
| HSPB8     | 2,155464 | 1,24E-08 |
| PKN1      | 2,155328 | 7,49E-28 |
| MRPS25    | 2,154394 | 4,66E-23 |
| CBR4      | 2,153718 | 1,21E-11 |
| ZFYVE21   | 2,153047 | 2,24E-11 |
| ALKBH4    | 2,15247  | 1,55E-17 |

|                      |          |          |
|----------------------|----------|----------|
| ARRB2                | 2,152402 | 4,76E-17 |
| WDR83                | 2,151794 | 1,27E-12 |
| ANGEL1               | 2,147876 | 2,36E-18 |
| MXI1                 | 2,145883 | 9,76E-08 |
| SOX4                 | 2,14442  | 6,78E-23 |
| PACSIN3              | 2,142783 | 3,27E-22 |
| MMAA                 | 2,142189 | 0,000294 |
| PUS10                | 2,141655 | 3,89E-05 |
| DBF4                 | 2,139736 | 7,48E-20 |
| FLOT2                | 2,138985 | 8,54E-17 |
| FAM50B               | 2,135868 | 9,02E-08 |
| MCM3AP- <del>L</del> | 2,13555  | 6,29E-08 |
| SLC25A39             | 2,132645 | 3,20E-35 |
| NPL                  | 2,131583 | 3,51E-06 |
| SLC48A1              | 2,130848 | 1,38E-06 |
| SPATA7               | 2,129072 | 7,38E-05 |
| FIBP                 | 2,125954 | 4,72E-24 |
| SERTAD4              | 2,125505 | 1,13E-05 |
| FBRSL1               | 2,124709 | 9,35E-26 |
| SPATA20              | 2,120514 | 6,05E-17 |
| FAM173A              | 2,116408 | 4,03E-10 |
| PPP1R21              | 2,114971 | 3,83E-08 |
| SLC43A2              | 2,113561 | 3,74E-11 |
| TET2                 | 2,111283 | 4,25E-12 |
| P4HTM                | 2,106627 | 4,49E-11 |
| GAS8                 | 2,105839 | 1,01E-10 |
| STUB1                | 2,103974 | 3,52E-28 |
| RNF215               | 2,103581 | 0,000197 |
| MYL12A               | 2,099602 | 1,06E-23 |
| XPC                  | 2,098413 | 2,46E-17 |
| ZFP1                 | 2,09494  | 6,06E-12 |
| GABPB1-AS            | 2,093046 | 8,78E-06 |
| COPG2                | 2,091579 | 1,42E-14 |
| PRR14                | 2,090174 | 2,99E-19 |
| COQ2                 | 2,087201 | 6,48E-11 |
| TMEM180              | 2,086691 | 9,37E-06 |
| SLC9A3R1             | 2,086148 | 1,52E-13 |
| SH3BGR               | 2,086072 | 0,000404 |
| PLEKHH3              | 2,079477 | 2,18E-05 |
| ZNF888               | 2,076895 | 1,11E-08 |
| C1orf115             | 2,075794 | 3,22E-07 |
| PXN-AS1              | 2,06517  | 5,58E-06 |
| IMPDH1               | 2,063952 | 1,19E-19 |
| ATP9A                | 2,062245 | 1,51E-22 |
| MYL12B               | 2,061831 | 1,04E-29 |
| SLC44A1              | 2,061724 | 1,01E-20 |
| MYO18A               | 2,061403 | 6,67E-09 |
| IQSEC1               | 2,054221 | 3,43E-17 |
| ACTR1B               | 2,05391  | 1,99E-05 |
| D2HGDH               | 2,052212 | 6,87E-08 |

|           |          |          |
|-----------|----------|----------|
| NUDT4     | 2,051178 | 2,90E-15 |
| RILP      | 2,050827 | 4,63E-05 |
| RAB11FIP1 | 2,05048  | 9,97E-13 |
| CAMK2N1   | 2,049931 | 7,99E-05 |
| RBSN      | 2,049141 | 1,20E-14 |
| PNRC1     | 2,04814  | 1,72E-10 |
| B9D1      | 2,047831 | 4,04E-05 |
| RALBP1    | 2,047563 | 3,71E-15 |
| C8orf82   | 2,046148 | 2,23E-14 |
| CXorf23   | 2,044912 | 1,15E-07 |
| C9orf16   | 2,04393  | 4,20E-13 |
| BET1      | 2,042569 | 1,83E-07 |
| PCDHB6    | 2,038169 | 0,000827 |
| PHKB      | 2,037131 | 3,06E-07 |
| GLCE      | 2,036132 | 5,05E-18 |
| TMEM168   | 2,035624 | 4,35E-17 |
| SNHG8     | 2,033567 | 3,09E-05 |
| FAHD1     | 2,033139 | 2,20E-18 |
| NRSN2-AS1 | 2,032845 | 3,01E-05 |
| CMBL      | 2,032363 | 9,67E-06 |
| DUSP16    | 2,031998 | 4,09E-19 |
| DLD       | 2,028155 | 1,05E-12 |
| ZYG11A    | 2,025623 | 0,000975 |
| ZNRF3     | 2,020852 | 5,09E-29 |
| STC1      | 2,019696 | 2,36E-12 |
| C2orf68   | 2,018387 | 6,33E-17 |
| KPTN      | 2,017309 | 1,45E-06 |
| MBLAC2    | 2,016765 | 0,000496 |
| ITPR2     | 2,015499 | 1,42E-09 |
| HMG20B    | 2,012787 | 9,12E-26 |
| NTHL1     | 2,011542 | 1,83E-11 |
| KATNAL2   | 2,01126  | 0,000424 |
| PDF       | 2,011182 | 4,37E-06 |
| HOXC10    | 2,010998 | 1,01E-14 |
| PLA2G12A  | 2,009136 | 6,94E-12 |
| CCDC85C   | 2,009036 | 1,06E-20 |
| FAM210B   | 2,004319 | 3,58E-08 |
| RAB6A     | 2,004296 | 7,08E-14 |
| TMEM183   | 2,004038 | 1,63E-22 |
| ZNF783    | 2,004001 | 1,79E-07 |
| HAUS4     | 2,003035 | 6,35E-06 |
| ZNF688    | 2,000232 | 8,95E-07 |
| FAM195A   | 1,999075 | 3,24E-18 |
| CAPN1     | 1,998882 | 3,87E-07 |
| C4orf48   | 1,996691 | 6,21E-07 |
| ZMYM2     | 1,994258 | 1,28E-22 |
| TET3      | 1,993538 | 6,16E-25 |
| GCSH      | 1,992323 | 6,17E-17 |
| DCXR      | 1,990985 | 2,44E-20 |
| OSBPL10   | 1,985807 | 7,70E-12 |

|           |          |          |
|-----------|----------|----------|
| SEMA6A    | 1,983625 | 7,49E-05 |
| PFKL      | 1,98315  | 8,41E-19 |
| KRBA1     | 1,983034 | 1,68E-07 |
| CFD       | 1,981082 | 0,000661 |
| PHLDA3    | 1,978925 | 0,000309 |
| ZNF641    | 1,978184 | 6,00E-07 |
| FBXO31    | 1,977104 | 3,53E-19 |
| EPB41L4A- | 1,975209 | 3,71E-06 |
| ZNRF1     | 1,971    | 1,01E-20 |
| TMEM150/  | 1,966107 | 2,20E-06 |
| SEMA3C    | 1,962173 | 2,18E-20 |
| RNASEH1-/ | 1,962078 | 3,36E-10 |
| ZNF276    | 1,961753 | 1,43E-14 |
| TUBB3     | 1,960246 | 1,03E-28 |
| BCR       | 1,958598 | 2,53E-09 |
| ZNF664    | 1,957711 | 1,23E-16 |
| CSDE1     | 1,956805 | 1,66E-16 |
| TSPAN17   | 1,956699 | 1,85E-13 |
| ITFG3     | 1,956052 | 1,50E-11 |
| RPUSD3    | 1,955138 | 2,57E-14 |
| CORO1B    | 1,953091 | 7,57E-08 |
| MGC72080  | 1,952673 | 1,41E-09 |
| C16orf13  | 1,949542 | 4,58E-19 |
| MVD       | 1,949524 | 3,68E-07 |
| APLP2     | 1,948641 | 5,91E-12 |
| DALRD3    | 1,94768  | 3,22E-07 |
| ULK3      | 1,947483 | 9,91E-11 |
| TTC30B    | 1,946677 | 0,000212 |
| ZNF595    | 1,946319 | 1,26E-07 |
| ZNF239    | 1,941304 | 0,000499 |
| ANKRD16   | 1,940581 | 3,64E-06 |
| POLI      | 1,939565 | 0,00014  |
| C7orf13   | 1,9394   | 1,93E-05 |
| LOC104968 | 1,939395 | 0,000375 |
| SLC25A10  | 1,937869 | 1,75E-19 |
| DTD1      | 1,935195 | 2,08E-14 |
| RNF130    | 1,932586 | 1,40E-14 |
| BRCA2     | 1,932489 | 4,38E-07 |
| CC2D1A    | 1,929781 | 1,51E-12 |
| C14orf169 | 1,929414 | 1,37E-10 |
| PMS2P1    | 1,929255 | 1,99E-07 |
| SPR       | 1,9206   | 7,71E-18 |
| KLHDC4    | 1,919695 | 5,60E-17 |
| ALPK1     | 1,916213 | 3,55E-05 |
| NT5C      | 1,912349 | 8,03E-09 |
| PEX11B    | 1,911073 | 1,10E-12 |
| ZSWIM7    | 1,910325 | 2,84E-09 |
| MTHFD2    | 1,909982 | 2,56E-06 |
| DTNA      | 1,909242 | 2,13E-07 |
| CLMN      | 1,908993 | 2,57E-08 |

|          |          |          |
|----------|----------|----------|
| TPCN2    | 1,90484  | 0,000312 |
| PLD2     | 1,90433  | 3,39E-05 |
| ADCK2    | 1,904253 | 4,29E-11 |
| CD320    | 1,904199 | 1,36E-15 |
| LMBR1    | 1,902846 | 4,10E-15 |
| TMEM216  | 1,901014 | 2,63E-05 |
| TRAP1    | 1,89938  | 3,97E-26 |
| GIGYF1   | 1,898956 | 3,89E-05 |
| HAGH     | 1,894491 | 2,11E-07 |
| MAGI1    | 1,894322 | 5,48E-09 |
| SNX27    | 1,893894 | 9,24E-19 |
| FAM53B   | 1,893867 | 1,15E-21 |
| HBP1     | 1,893151 | 1,49E-05 |
| SEPW1    | 1,892617 | 1,83E-08 |
| UBN2     | 1,885754 | 1,59E-11 |
| SLC22A5  | 1,885237 | 3,07E-07 |
| DHODH    | 1,884965 | 1,22E-10 |
| RASA1    | 1,883772 | 2,11E-09 |
| KIAA1549 | 1,881756 | 4,74E-09 |
| SFXN2    | 1,880868 | 2,08E-07 |
| HOXC13   | 1,880363 | 2,89E-05 |
| GSTK1    | 1,879914 | 3,30E-08 |
| PIK3R2   | 1,8799   | 5,09E-10 |
| GNB2     | 1,879444 | 4,60E-20 |
| MKS1     | 1,877969 | 1,74E-08 |
| UNKL     | 1,876338 | 1,36E-09 |
| THOC7    | 1,875239 | 5,26E-21 |
| TBC1D5   | 1,874357 | 9,30E-13 |
| PAQR5    | 1,873603 | 6,19E-05 |
| PIEZO1   | 1,87308  | 4,32E-13 |
| ACP6     | 1,872481 | 4,71E-07 |
| RNASEH2A | 1,870628 | 5,52E-20 |
| TES      | 1,870369 | 4,41E-08 |
| FAM149B1 | 1,868862 | 3,62E-06 |
| UHRF1BP1 | 1,868771 | 1,88E-09 |
| RBM48    | 1,868029 | 5,04E-05 |
| ATXN3    | 1,865296 | 7,76E-07 |
| AADAT    | 1,86182  | 1,37E-07 |
| NADK2    | 1,85876  | 1,24E-11 |
| WIBG     | 1,856223 | 4,09E-13 |
| MYO6     | 1,854099 | 3,02E-20 |
| USP6NL   | 1,853609 | 5,13E-12 |
| TTC19    | 1,85162  | 7,04E-12 |
| PPCDC    | 1,851452 | 2,30E-07 |
| C20orf27 | 1,849498 | 1,64E-20 |
| CYB5D2   | 1,849045 | 2,92E-08 |
| TRAPPC2L | 1,847447 | 3,37E-15 |
| SPATA33  | 1,846886 | 1,96E-09 |
| SPIRE2   | 1,845057 | 0,000265 |
| RBM38    | 1,842843 | 2,12E-14 |

|           |          |          |
|-----------|----------|----------|
| HMHA1     | 1,837955 | 7,94E-06 |
| ZNF572    | 1,835975 | 0,000659 |
| RPS3      | 1,835934 | 1,68E-15 |
| LINC01521 | 1,834249 | 0,000685 |
| IFI30     | 1,833452 | 1,94E-08 |
| ZFP69B    | 1,83134  | 4,63E-05 |
| ZNF552    | 1,82973  | 0,000907 |
| SETMAR    | 1,828047 | 1,86E-10 |
| N4BP2     | 1,827022 | 3,87E-06 |
| ZNF37BP   | 1,825624 | 8,89E-05 |
| PRSS23    | 1,823838 | 6,95E-09 |
| FAM222A   | 1,823275 | 7,72E-12 |
| LINC01004 | 1,817787 | 0,000739 |
| DANCR     | 1,817711 | 4,00E-10 |
| PVRL1     | 1,817504 | 8,65E-07 |
| NFXL1     | 1,815723 | 7,76E-05 |
| CHCHD10   | 1,814073 | 4,17E-19 |
| CBLL1     | 1,813919 | 8,57E-13 |
| PXYLP1    | 1,81364  | 0,000195 |
| SNHG25    | 1,809447 | 2,44E-05 |
| SUMF1     | 1,808913 | 2,50E-07 |
| MCM7      | 1,807716 | 1,33E-16 |
| FAM134B   | 1,807421 | 0,000856 |
| MRPL11    | 1,806468 | 1,49E-20 |
| ZNF138    | 1,8051   | 6,20E-10 |
| SLC50A1   | 1,803743 | 1,20E-14 |
| GLUL      | 1,803293 | 2,27E-18 |
| AXIN2     | 1,802006 | 7,62E-19 |
| TRIAP1    | 1,8017   | 1,33E-10 |
| PATZ1     | 1,800782 | 1,89E-10 |
| MZT2A     | 1,799285 | 3,68E-07 |
| SFT2D3    | 1,798247 | 4,51E-06 |
| MAN2A2    | 1,796217 | 9,47E-06 |
| LYSMD2    | 1,796023 | 1,04E-09 |
| ACTR6     | 1,795106 | 6,88E-11 |
| PPP1R16A  | 1,795033 | 4,08E-09 |
| PEX10     | 1,789174 | 1,44E-13 |
| ERMP1     | 1,788889 | 2,49E-07 |
| ATP5S     | 1,78787  | 0,000138 |
| SLC25A15  | 1,786721 | 1,38E-08 |
| EHMT2     | 1,785871 | 2,13E-24 |
| WDR59     | 1,782655 | 4,99E-10 |
| PECR      | 1,780711 | 4,75E-05 |
| NFIA      | 1,780319 | 1,62E-06 |
| GNPTAB    | 1,780076 | 1,95E-14 |
| C14orf1   | 1,779046 | 4,56E-06 |
| KIF27     | 1,777702 | 0,000414 |
| ZRANB3    | 1,777016 | 2,34E-05 |
| TET1      | 1,775689 | 0,000315 |
| TLE3      | 1,772646 | 1,75E-21 |

|           |          |          |
|-----------|----------|----------|
| SLC12A9   | 1,769796 | 6,06E-06 |
| CCS       | 1,769106 | 0,00028  |
| RCOR1     | 1,766899 | 1,81E-14 |
| PPAP2A    | 1,764088 | 4,48E-07 |
| ARPC1B    | 1,763175 | 5,10E-10 |
| WDR83OS   | 1,760768 | 7,74E-19 |
| ARHGEF3   | 1,760545 | 1,67E-08 |
| TMEM243   | 1,759703 | 4,03E-05 |
| ZFH3      | 1,758663 | 4,54E-11 |
| ZNF524    | 1,756572 | 7,16E-06 |
| ZFAS1     | 1,756349 | 0,000978 |
| TMEM170A  | 1,75631  | 9,39E-05 |
| EMB       | 1,755324 | 7,13E-11 |
| KLHDC2    | 1,754786 | 9,60E-08 |
| WDR60     | 1,753781 | 6,82E-07 |
| VTI1B     | 1,753633 | 7,25E-11 |
| CRNDE     | 1,751787 | 0,000118 |
| CASP6     | 1,751759 | 1,54E-08 |
| PRKAR1B   | 1,750418 | 1,21E-16 |
| ATMIN     | 1,750178 | 5,93E-16 |
| ADD3      | 1,749647 | 4,19E-09 |
| GPR153    | 1,746415 | 9,06E-06 |
| LRRC75A-A | 1,746218 | 1,05E-07 |
| C12orf66  | 1,745607 | 0,000101 |
| ZNF687    | 1,745124 | 3,16E-20 |
| CRIP2     | 1,744888 | 3,30E-16 |
| SRD5A3    | 1,744536 | 2,42E-09 |
| HMG1      | 1,74279  | 1,52E-20 |
| COA5      | 1,740389 | 9,38E-10 |
| PSMD5-AS1 | 1,738834 | 4,80E-05 |
| GIN5      | 1,734278 | 8,93E-11 |
| RSBN1     | 1,734077 | 1,90E-11 |
| XPOT      | 1,733912 | 9,31E-12 |
| ACACB     | 1,733896 | 0,000135 |
| ATXN7L1   | 1,733583 | 9,85E-08 |
| MLYCD     | 1,732661 | 2,63E-07 |
| HIPK1     | 1,729947 | 4,30E-16 |
| TMEM129   | 1,729452 | 2,18E-05 |
| NDUFA7    | 1,72832  | 9,73E-08 |
| COG5      | 1,72825  | 2,28E-14 |
| ZNF766    | 1,72766  | 1,22E-12 |
| TCF25     | 1,72755  | 3,48E-15 |
| DCLRE1B   | 1,727541 | 2,68E-10 |
| MTHFR     | 1,725476 | 1,46E-05 |
| ZNF624    | 1,724365 | 0,000976 |
| POLR2J    | 1,723672 | 1,37E-11 |
| TRNT1     | 1,723652 | 6,57E-05 |
| GPHN      | 1,720603 | 5,31E-12 |
| ISOC1     | 1,72057  | 3,78E-12 |
| RNF187    | 1,720464 | 2,61E-08 |



|          |          |          |
|----------|----------|----------|
| FAM172A  | 1,715962 | 1,17E-07 |
| PRICKLE2 | 1,715857 | 2,28E-05 |
| C14orf2  | 1,714192 | 6,49E-18 |
| ATP5D    | 1,711968 | 2,96E-18 |
| SLC26A11 | 1,711233 | 0,000151 |
| SLC2A4RG | 1,7096   | 9,99E-15 |
| ZNF485   | 1,704718 | 0,000194 |
| ENDOG    | 1,703823 | 4,60E-09 |
| PPM1A    | 1,703019 | 6,29E-07 |
| TMEM37   | 1,702418 | 8,79E-06 |
| TST      | 1,701228 | 0,000567 |
| GRK6     | 1,700232 | 1,86E-19 |
| HEATR5A  | 1,698098 | 6,57E-08 |
| FAM189B  | 1,697484 | 8,85E-10 |
| DTNB     | 1,696495 | 7,52E-09 |
| SHROOM3  | 1,693848 | 2,41E-11 |
| ATP5A1   | 1,693419 | 2,87E-23 |
| PYCR1    | 1,692536 | 1,62E-11 |
| KIAA0195 | 1,690288 | 7,87E-09 |
| LOXL3    | 1,690267 | 0,000224 |
| SPATA13  | 1,687815 | 1,55E-06 |
| FERMT1   | 1,686332 | 8,03E-05 |
| ISOC2    | 1,686328 | 2,76E-19 |
| PTPRS    | 1,685469 | 1,74E-13 |
| RPSAP58  | 1,685406 | 3,22E-15 |
| SCML2    | 1,684653 | 0,0007   |
| ACAA1    | 1,683916 | 3,42E-06 |
| PUS7     | 1,683416 | 1,81E-10 |
| SAYSD1   | 1,68158  | 5,51E-08 |
| ENSA     | 1,681421 | 1,07E-22 |
| MARCH8   | 1,681049 | 1,28E-05 |
| ANK3     | 1,680761 | 6,55E-08 |
| EIF2D    | 1,675928 | 4,62E-13 |
| NBPF1    | 1,6743   | 1,53E-06 |
| GTF3A    | 1,674053 | 1,07E-18 |
| TSPAN33  | 1,67395  | 9,38E-05 |
| MANEAL   | 1,673615 | 1,35E-09 |
| CDC25B   | 1,673612 | 6,97E-14 |
| PPP1R35  | 1,673349 | 2,36E-06 |
| ICAM3    | 1,672661 | 0,000314 |
| ATP5J2   | 1,671828 | 8,17E-10 |
| ZNF816   | 1,671338 | 5,34E-05 |
| TRPM7    | 1,669232 | 1,93E-19 |
| DNAJC30  | 1,667505 | 2,39E-07 |
| FUT8     | 1,667096 | 1,50E-14 |
| TRIM4    | 1,666799 | 4,77E-07 |
| LAMTOR2  | 1,665688 | 1,82E-12 |
| NLN      | 1,665655 | 2,12E-14 |
| SHTN1    | 1,665494 | 5,59E-15 |
| ENDOV    | 1,664402 | 2,44E-06 |

|          |          |          |
|----------|----------|----------|
| CAMK2N2  | 1,663811 | 0,000651 |
| FBXL19   | 1,663763 | 2,66E-13 |
| ULK1     | 1,663334 | 5,13E-08 |
| NOL3     | 1,661308 | 1,13E-07 |
| TTC12    | 1,659495 | 0,000623 |
| MPG      | 1,659007 | 3,42E-11 |
| G6PC3    | 1,657362 | 1,83E-11 |
| RBL2     | 1,653021 | 5,87E-09 |
| EFCAB11  | 1,652874 | 9,10E-06 |
| NIPAL2   | 1,651711 | 0,000437 |
| ZNF14    | 1,650307 | 0,000154 |
| ZNF277   | 1,648854 | 8,74E-07 |
| LTBP3    | 1,648382 | 6,01E-08 |
| FAM175A  | 1,647399 | 9,76E-08 |
| TRAF4    | 1,646999 | 8,00E-13 |
| PLXDC2   | 1,646834 | 1,51E-05 |
| CCDC115  | 1,64499  | 7,70E-08 |
| CTC1     | 1,644876 | 9,17E-08 |
| ABHD17C  | 1,644094 | 0,000626 |
| RPL22L1  | 1,643909 | 6,20E-07 |
| CHST15   | 1,643672 | 2,01E-09 |
| TMOD2    | 1,64313  | 4,44E-05 |
| DCTPP1   | 1,642036 | 2,16E-13 |
| ALDH3A2  | 1,640401 | 1,84E-17 |
| RALGPS2  | 1,639781 | 6,46E-09 |
| HMBS     | 1,638692 | 2,23E-12 |
| VPS72    | 1,635462 | 2,98E-08 |
| KNOP1    | 1,635214 | 1,86E-09 |
| EZH1     | 1,635135 | 0,000769 |
| ZSCAN2   | 1,635122 | 9,09E-09 |
| ZNF720   | 1,635019 | 0,000123 |
| IER5L    | 1,633869 | 3,39E-05 |
| CALM1    | 1,632352 | 7,93E-10 |
| LRRC1    | 1,632016 | 2,04E-08 |
| PNMA1    | 1,630979 | 1,06E-10 |
| CHCHD6   | 1,630505 | 8,04E-06 |
| PAPSS1   | 1,629269 | 1,77E-05 |
| GID8     | 1,627188 | 2,16E-17 |
| BDH1     | 1,626953 | 2,44E-11 |
| C14orf80 | 1,626784 | 1,08E-10 |
| INPP4B   | 1,626274 | 1,92E-05 |
| ZNF821   | 1,625996 | 7,19E-05 |
| CHMP1B   | 1,623617 | 1,82E-11 |
| GABBR1   | 1,623241 | 0,00079  |
| GPX4     | 1,622008 | 5,29E-20 |
| CDH24    | 1,621851 | 8,06E-09 |
| RPL13    | 1,61737  | 8,67E-14 |
| DPAGT1   | 1,615532 | 2,09E-12 |
| MFSD9    | 1,615493 | 4,83E-05 |
| NSD1     | 1,615293 | 6,24E-16 |

|          |          |          |
|----------|----------|----------|
| C12orf73 | 1,613635 | 0,000195 |
| EBAG9    | 1,612681 | 1,91E-08 |
| ERMAP    | 1,611004 | 0,000899 |
| WDR34    | 1,61057  | 5,92E-17 |
| MSRB1    | 1,609883 | 3,78E-06 |
| ZFPM1    | 1,60938  | 3,72E-06 |
| YEATS4   | 1,608328 | 6,96E-06 |
| NDUFV1   | 1,606715 | 8,68E-14 |
| SMPD2    | 1,606566 | 0,000497 |
| SNAPC5   | 1,60576  | 2,53E-06 |
| LIG1     | 1,605663 | 3,30E-13 |
| SLC39A6  | 1,605592 | 7,10E-08 |
| HDHD2    | 1,605339 | 3,49E-06 |
| SOS2     | 1,604938 | 6,49E-07 |
| CTAGE5   | 1,604838 | 0,000951 |
| CDK2AP2  | 1,60342  | 6,78E-11 |
| SETDB1   | 1,601843 | 1,30E-12 |
| AKAP9    | 1,601383 | 6,22E-07 |
| HEXDC    | 1,600995 | 0,000229 |
| ADRBK2   | 1,60074  | 1,66E-05 |
| BPHL     | 1,600008 | 1,50E-07 |
| MAPK8IP1 | 1,595586 | 1,10E-08 |
| ZFP30    | 1,587723 | 0,000235 |
| ASMTL    | 1,587099 | 6,82E-06 |
| RNF103   | 1,586805 | 9,15E-06 |
| TMEM120/ | 1,585463 | 1,12E-06 |
| SEC11C   | 1,585223 | 1,17E-06 |
| RAB1B    | 1,584323 | 1,90E-06 |
| ZNF91    | 1,584207 | 3,55E-09 |
| BCAS2    | 1,584164 | 1,20E-16 |
| IQGAP3   | 1,584156 | 0,000236 |
| NPM3     | 1,583593 | 9,95E-08 |
| SMAGP    | 1,582926 | 2,02E-09 |
| ACSF3    | 1,581826 | 1,56E-10 |
| LYRM1    | 1,58173  | 3,46E-06 |
| MXD3     | 1,581474 | 8,57E-06 |
| ZNF490   | 1,574291 | 0,000348 |
| CHCHD4   | 1,574256 | 4,87E-06 |
| PDCD2    | 1,573336 | 1,36E-14 |
| ONECUT2  | 1,572192 | 3,78E-06 |
| ANXA4    | 1,571865 | 1,03E-08 |
| NARS2    | 1,570482 | 1,28E-07 |
| PCDHB16  | 1,570138 | 0,000133 |
| HSPA4L   | 1,568353 | 0,000522 |
| ACTR3B   | 1,567716 | 1,56E-08 |
| TMEM265  | 1,565851 | 9,68E-06 |
| ZNF429   | 1,56551  | 2,94E-06 |
| PBX2     | 1,562145 | 2,15E-13 |
| PPFIA3   | 1,561481 | 7,52E-11 |
| SMDT1    | 1,55971  | 7,89E-05 |

|          |          |          |
|----------|----------|----------|
| ZNF764   | 1,558599 | 1,02E-05 |
| CYB5A    | 1,556601 | 3,70E-06 |
| EAPP     | 1,554809 | 3,91E-09 |
| DGCR6L   | 1,551807 | 4,83E-11 |
| PNPO     | 1,551323 | 2,57E-08 |
| RPLP0    | 1,549083 | 3,69E-18 |
| TCTN1    | 1,545753 | 2,86E-07 |
| ANKEF1   | 1,544823 | 1,15E-07 |
| GDE1     | 1,544799 | 4,89E-10 |
| AHCY     | 1,543915 | 2,72E-10 |
| PPP1R3D  | 1,543339 | 2,79E-05 |
| EBPL     | 1,542646 | 0,000122 |
| TMOD3    | 1,542362 | 9,50E-12 |
| PFKFB2   | 1,542327 | 1,86E-06 |
| THAP5    | 1,541725 | 2,06E-09 |
| CUL9     | 1,540075 | 2,51E-07 |
| METTL4   | 1,537601 | 7,37E-05 |
| SQLE     | 1,53663  | 1,23E-12 |
| MLST8    | 1,536595 | 5,50E-14 |
| PCLO     | 1,536313 | 7,58E-06 |
| FAM102A  | 1,535864 | 7,72E-12 |
| RHOB     | 1,532373 | 2,99E-09 |
| MAPK3    | 1,530696 | 1,18E-05 |
| B3GNT2   | 1,529971 | 7,09E-05 |
| ZNF616   | 1,528642 | 9,84E-09 |
| TPBG     | 1,528623 | 7,80E-14 |
| ILVBL    | 1,527468 | 4,14E-14 |
| HR       | 1,527185 | 5,41E-09 |
| AK4      | 1,526671 | 5,05E-08 |
| RPS29    | 1,525823 | 1,38E-07 |
| PCNXL3   | 1,525462 | 7,25E-11 |
| CLNS1A   | 1,524606 | 4,57E-15 |
| ECHS1    | 1,524305 | 1,89E-12 |
| ZNF627   | 1,523422 | 5,37E-09 |
| CIRBP    | 1,523411 | 6,72E-06 |
| SOX12    | 1,522995 | 2,09E-15 |
| ZBTB25   | 1,521851 | 0,000474 |
| PCYOX1   | 1,521459 | 5,25E-08 |
| RABIF    | 1,521343 | 8,39E-08 |
| FAR2     | 1,520309 | 3,58E-07 |
| ADCY3    | 1,519559 | 7,73E-10 |
| ZNF675   | 1,516391 | 2,06E-06 |
| SIKE1    | 1,516336 | 1,34E-13 |
| BCL7C    | 1,515885 | 1,53E-10 |
| PSEN1    | 1,51418  | 5,55E-11 |
| LMTK2    | 1,508559 | 2,15E-11 |
| MAP3K11  | 1,506943 | 6,33E-06 |
| SLC22A23 | 1,505695 | 1,06E-12 |
| PTPMT1   | 1,504631 | 1,71E-10 |
| SLC25A1  | 1,504579 | 5,21E-08 |

|          |          |          |
|----------|----------|----------|
| ZNF205   | 1,504514 | 7,03E-09 |
| CHD3     | 1,503458 | 1,37E-12 |
| PPP1CA   | 1,499916 | 1,49E-18 |
| NDUFB10  | 1,498652 | 1,56E-12 |
| INTS3    | 1,49795  | 4,02E-10 |
| INTS2    | 1,496846 | 1,24E-08 |
| DNAAF2   | 1,495762 | 6,98E-10 |
| PDE4DIP  | 1,494538 | 1,06E-05 |
| ITGA2    | 1,494087 | 9,95E-05 |
| PSME1    | 1,492963 | 7,28E-10 |
| ZNF704   | 1,492468 | 2,78E-07 |
| FRAT2    | 1,492144 | 0,000513 |
| ELMOD2   | 1,489231 | 7,44E-08 |
| VPS13A   | 1,488285 | 8,86E-08 |
| EXOC6    | 1,487957 | 8,05E-06 |
| ZNHIT1   | 1,487181 | 5,27E-05 |
| SIMC1    | 1,484965 | 0,000306 |
| ZNF84    | 1,484252 | 1,16E-08 |
| RDH13    | 1,48391  | 2,17E-08 |
| CCDC71L  | 1,483587 | 0,000769 |
| ADRBK1   | 1,483144 | 4,62E-08 |
| EPM2AIP1 | 1,480913 | 3,04E-05 |
| C6orf120 | 1,480514 | 4,56E-07 |
| ADAT1    | 1,47927  | 2,13E-11 |
| NUBP2    | 1,478648 | 8,77E-12 |
| ADI1     | 1,477876 | 1,41E-11 |
| POLR1D   | 1,476078 | 1,86E-14 |
| TLDC1    | 1,475403 | 3,29E-05 |
| CCPG1    | 1,475025 | 6,71E-05 |
| ANAPC16  | 1,472985 | 1,92E-11 |
| ORC5     | 1,472818 | 4,09E-05 |
| IMPACT   | 1,472815 | 4,64E-07 |
| SYPL1    | 1,472575 | 7,44E-11 |
| PCDHB14  | 1,471393 | 4,31E-05 |
| CFAP36   | 1,469565 | 2,36E-06 |
| BRWD1    | 1,469072 | 4,08E-09 |
| PKMYT1   | 1,468509 | 4,71E-08 |
| MDM4     | 1,466459 | 2,28E-05 |
| HIP1R    | 1,465527 | 1,04E-07 |
| ARSD     | 1,464476 | 0,000567 |
| SCARB2   | 1,461615 | 3,08E-09 |
| RABL2B   | 1,461185 | 0,000371 |
| CNOT6    | 1,460618 | 2,39E-11 |
| CCNJ     | 1,460076 | 2,50E-08 |
| GLI4     | 1,458828 | 0,000759 |
| CASKIN2  | 1,458788 | 2,82E-10 |
| TMEM187  | 1,458302 | 0,000982 |
| STRBP    | 1,457851 | 3,38E-09 |
| FRS2     | 1,456657 | 5,76E-06 |
| MED13L   | 1,455878 | 1,67E-07 |

|            |          |          |
|------------|----------|----------|
| MTMR14     | 1,45435  | 9,84E-06 |
| PAXIP1-AS1 | 1,452012 | 0,00058  |
| ZNF718     | 1,451624 | 3,46E-05 |
| ZKSCAN5    | 1,45098  | 2,65E-07 |
| MTA3       | 1,450309 | 7,78E-09 |
| PIGQ       | 1,448367 | 7,80E-07 |
| PTBP3      | 1,447328 | 7,39E-09 |
| CPT1A      | 1,447157 | 3,56E-13 |
| OS9        | 1,443966 | 1,70E-05 |
| C4orf3     | 1,443024 | 5,33E-05 |
| JUNB       | 1,442203 | 0,000198 |
| MTIF3      | 1,441651 | 8,31E-07 |
| FAM120B    | 1,441401 | 1,18E-06 |
| SOS1       | 1,440184 | 2,74E-09 |
| DTD2       | 1,438529 | 0,000387 |
| TMEM241    | 1,438004 | 5,00E-07 |
| DMXL2      | 1,437112 | 8,99E-11 |
| VPS4B      | 1,43643  | 1,28E-09 |
| TMEM186    | 1,436155 | 3,11E-05 |
| ZNF703     | 1,435863 | 9,62E-13 |
| SETD6      | 1,435755 | 6,41E-05 |
| TRIM59     | 1,435709 | 7,66E-05 |
| PP7080     | 1,43563  | 9,47E-06 |
| NUDCD2     | 1,434983 | 1,50E-07 |
| AKT1       | 1,434803 | 6,66E-08 |
| EIF4EBP2   | 1,433774 | 9,05E-06 |
| CABLES2    | 1,432036 | 9,99E-07 |
| HAUS1      | 1,430817 | 4,08E-06 |
| AP4E1      | 1,430691 | 9,82E-08 |
| COX18      | 1,429547 | 1,30E-05 |
| MCCC2      | 1,428335 | 2,53E-08 |
| COX6C      | 1,428309 | 1,23E-10 |
| RETSAT     | 1,427911 | 3,08E-07 |
| ATP13A2    | 1,426477 | 2,58E-06 |
| OXSM       | 1,425818 | 0,000115 |
| RPS25      | 1,425259 | 4,18E-10 |
| GPD1L      | 1,425129 | 1,82E-05 |
| ZNF480     | 1,42404  | 3,18E-06 |
| ZNF286A    | 1,423224 | 2,82E-08 |
| KDM5B      | 1,423219 | 2,92E-06 |
| ESYT2      | 1,421289 | 6,55E-12 |
| TGIF2      | 1,420834 | 7,28E-06 |
| H3F3AP4    | 1,420488 | 2,06E-09 |
| SMYD2      | 1,420216 | 0,000322 |
| FAM86C1    | 1,420025 | 1,43E-06 |
| VPS35      | 1,418895 | 1,27E-13 |
| ADCK1      | 1,418661 | 7,61E-05 |
| DBN1       | 1,418411 | 1,12E-15 |
| UNG        | 1,416136 | 3,08E-10 |
| ZDHHC12    | 1,416053 | 3,78E-06 |

|          |          |          |
|----------|----------|----------|
| LOC90784 | 1,412956 | 1,00E-07 |
| REL      | 1,412032 | 8,33E-05 |
| PCMTD2   | 1,41152  | 0,000787 |
| KIAA1522 | 1,411177 | 2,17E-13 |
| APOA1BP  | 1,41102  | 1,73E-09 |
| C22orf29 | 1,409395 | 0,000173 |
| BRK1     | 1,408909 | 2,92E-11 |
| MIPEP    | 1,408843 | 8,57E-08 |
| MZT2B    | 1,408597 | 2,76E-08 |
| NFIB     | 1,406256 | 1,30E-06 |
| SUV420H1 | 1,404569 | 6,38E-11 |
| RPLP1    | 1,404294 | 5,45E-06 |
| COX14    | 1,403056 | 1,43E-06 |
| TRMT10A  | 1,402448 | 0,00094  |
| ADGRL1   | 1,402058 | 4,08E-11 |
| FAM45A   | 1,401654 | 3,35E-06 |
| ACADSB   | 1,401202 | 3,47E-05 |
| MLLT4    | 1,40021  | 3,17E-06 |
| ZNF710   | 1,400147 | 6,75E-08 |
| KCTD3    | 1,399346 | 1,21E-11 |
| YIF1A    | 1,399211 | 3,74E-12 |
| NAMPT    | 1,396604 | 8,12E-09 |
| PRUNE    | 1,39609  | 1,01E-09 |
| SRR      | 1,393544 | 0,000557 |
| MFSD10   | 1,389426 | 4,71E-08 |
| SYNJ2BP  | 1,38836  | 0,000195 |
| CEP68    | 1,387581 | 8,03E-06 |
| SIPA1L1  | 1,386683 | 2,79E-11 |
| NPR3     | 1,386128 | 0,000368 |
| FBXW8    | 1,385672 | 4,25E-08 |
| HSCB     | 1,383644 | 2,35E-05 |
| FAM110A  | 1,383427 | 0,000118 |
| MXD4     | 1,383272 | 0,000929 |
| MED28    | 1,382231 | 8,05E-08 |
| UBAC1    | 1,381132 | 1,69E-11 |
| S100A10  | 1,380711 | 2,49E-09 |
| LRFN4    | 1,380081 | 2,55E-09 |
| DHPS     | 1,379804 | 8,72E-08 |
| SFXN4    | 1,379125 | 8,84E-08 |
| SCARB1   | 1,377498 | 9,12E-07 |
| GRN      | 1,376396 | 0,000113 |
| HSD17B4  | 1,376273 | 1,93E-07 |
| SRI      | 1,37416  | 8,90E-07 |
| ZNF254   | 1,374146 | 2,34E-05 |
| TNPO2    | 1,373216 | 5,15E-05 |
| METTL8   | 1,372768 | 3,24E-05 |
| LY6E     | 1,372409 | 2,93E-05 |
| CTBP2    | 1,371843 | 3,07E-12 |
| TM7SF3   | 1,371455 | 1,44E-06 |
| TRMT112  | 1,368434 | 1,13E-08 |

|           |          |          |
|-----------|----------|----------|
| ZNF394    | 1,368214 | 0,000645 |
| NSMCE4A   | 1,367228 | 3,41E-06 |
| STX6      | 1,366745 | 1,51E-10 |
| WDR54     | 1,366023 | 4,77E-05 |
| MAPK6     | 1,364969 | 1,66E-11 |
| POLR1A    | 1,364301 | 1,30E-08 |
| STX10     | 1,363146 | 2,98E-06 |
| SGPL1     | 1,362901 | 2,33E-09 |
| KREMEN1   | 1,362842 | 0,000204 |
| VIPAS39   | 1,362097 | 1,71E-07 |
| TCF3      | 1,360946 | 5,26E-13 |
| ANKRD50   | 1,360407 | 1,33E-06 |
| ABHD14B   | 1,360277 | 8,12E-06 |
| RPL41     | 1,360262 | 4,01E-12 |
| NEDD1     | 1,359517 | 1,28E-07 |
| PARP16    | 1,358969 | 0,000132 |
| PCCB      | 1,358779 | 3,81E-11 |
| AGA       | 1,358565 | 0,000949 |
| PLEKHA1   | 1,358066 | 0,000669 |
| LIG3      | 1,357278 | 2,98E-09 |
| NAPG      | 1,356531 | 1,25E-05 |
| ARPP19    | 1,35592  | 1,46E-13 |
| GABPB1    | 1,355614 | 8,22E-07 |
| VPS50     | 1,35335  | 0,000229 |
| CHEK2     | 1,352619 | 9,92E-05 |
| CCDC53    | 1,350969 | 0,000546 |
| KIAA1671  | 1,349825 | 2,34E-05 |
| CCNI      | 1,348452 | 1,77E-08 |
| LEF1      | 1,347016 | 5,29E-06 |
| RAB11FIP3 | 1,345601 | 6,19E-05 |
| ESCO1     | 1,345598 | 4,66E-07 |
| EXOC4     | 1,343408 | 4,35E-08 |
| AHR       | 1,342473 | 6,09E-10 |
| FAM120AC  | 1,340297 | 3,23E-06 |
| PIP4K2C   | 1,340205 | 1,92E-05 |
| POLR2G    | 1,340152 | 1,11E-10 |
| RPAIN     | 1,336928 | 1,65E-08 |
| TMEM64    | 1,336395 | 2,47E-10 |
| SAC3D1    | 1,335956 | 6,02E-07 |
| TAB3      | 1,335508 | 0,000101 |
| KRCC1     | 1,335024 | 8,66E-06 |
| FLYWCH2   | 1,334891 | 9,85E-07 |
| LPCAT3    | 1,332333 | 0,000121 |
| NDUFB1    | 1,32956  | 4,19E-07 |
| NDUFS8    | 1,329363 | 8,40E-11 |
| MRM1      | 1,328454 | 0,000449 |
| MIS18BP1  | 1,328224 | 0,000116 |
| TMEM251   | 1,32697  | 5,50E-07 |
| KDM6B     | 1,326799 | 1,59E-08 |
| CENPH     | 1,326506 | 0,000394 |



|           |          |          |
|-----------|----------|----------|
| ASB13     | 1,325568 | 2,50E-06 |
| TCAF1     | 1,325269 | 5,50E-06 |
| KLHL36    | 1,32288  | 1,31E-08 |
| HIGD2A    | 1,321822 | 5,89E-13 |
| PAFAH1B3  | 1,320679 | 7,66E-10 |
| PPAP2C    | 1,320635 | 9,67E-06 |
| PSRC1     | 1,319806 | 2,53E-05 |
| ISCU      | 1,319281 | 1,67E-07 |
| DHX40     | 1,319265 | 1,48E-09 |
| CCDC90B   | 1,318993 | 4,77E-05 |
| BBS10     | 1,318799 | 0,000447 |
| MYD88     | 1,3185   | 1,60E-05 |
| MSH3      | 1,316345 | 7,33E-06 |
| DNMT3A    | 1,315263 | 1,10E-08 |
| ACVR1B    | 1,314888 | 6,79E-07 |
| NLRX1     | 1,314639 | 6,28E-05 |
| DDX6      | 1,313418 | 1,25E-07 |
| LINC01184 | 1,3112   | 6,13E-05 |
| MSMO1     | 1,307317 | 0,000779 |
| HDHD3     | 1,30702  | 2,20E-05 |
| CIPC      | 1,305592 | 5,41E-05 |
| CTDSPL    | 1,305335 | 2,00E-06 |
| POLR2J3   | 1,305099 | 0,00099  |
| GABPB2    | 1,304988 | 0,000186 |
| MSL3P1    | 1,304961 | 0,000311 |
| BCL7A     | 1,304773 | 1,62E-07 |
| LINC00938 | 1,303275 | 0,000963 |
| LEO1      | 1,299512 | 1,36E-11 |
| CHMP4A    | 1,297951 | 7,27E-06 |
| PEX26     | 1,296685 | 1,05E-08 |
| C19orf60  | 1,295582 | 1,68E-06 |
| GTF2I     | 1,295255 | 1,57E-11 |
| FBXL15    | 1,295053 | 0,000164 |
| FAM133B   | 1,294892 | 0,000108 |
| PICK1     | 1,294728 | 6,77E-05 |
| PANK1     | 1,293338 | 1,26E-05 |
| COX20     | 1,292111 | 6,70E-06 |
| BLVRB     | 1,29186  | 0,000742 |
| RNF169    | 1,289095 | 1,16E-05 |
| PLXNA3    | 1,288459 | 0,000268 |
| ZMYND11   | 1,288326 | 8,33E-06 |
| PIGV      | 1,288209 | 0,000594 |
| RPS15A    | 1,287591 | 2,06E-08 |
| ERP29     | 1,287022 | 1,34E-06 |
| SIVA1     | 1,286808 | 4,38E-07 |
| IGSF3     | 1,286523 | 0,000466 |
| PTRHD1    | 1,28582  | 5,14E-05 |
| COX5B     | 1,285643 | 1,92E-10 |
| TRIM41    | 1,285045 | 2,52E-06 |
| MVK       | 1,283493 | 0,000464 |

|          |          |          |
|----------|----------|----------|
| PHKA2    | 1,282427 | 3,17E-05 |
| USP8     | 1,282385 | 5,79E-12 |
| CAT      | 1,28111  | 1,05E-07 |
| ATP5G2   | 1,280033 | 2,95E-11 |
| DEPDC1B  | 1,279336 | 9,88E-06 |
| COL18A1  | 1,278955 | 6,74E-09 |
| AFTPH    | 1,278944 | 1,43E-07 |
| SRPK2    | 1,278799 | 4,42E-10 |
| RPS3A    | 1,278333 | 2,44E-05 |
| NDUFA3   | 1,277125 | 1,38E-06 |
| TARS2    | 1,276639 | 1,45E-06 |
| FMNL2    | 1,27526  | 4,70E-06 |
| RHBDD2   | 1,274024 | 5,08E-07 |
| TMEM161/ | 1,27358  | 8,54E-05 |
| NBPF3    | 1,271929 | 0,000498 |
| ALDH16A1 | 1,271799 | 2,14E-06 |
| PRDM4    | 1,271686 | 3,14E-12 |
| BCKDK    | 1,271599 | 3,43E-08 |
| CCDC85B  | 1,270974 | 3,29E-10 |
| RAB40C   | 1,270699 | 4,49E-05 |
| ZNF768   | 1,269273 | 1,10E-08 |
| PAWR     | 1,269038 | 0,000354 |
| GSKIP    | 1,268565 | 4,76E-05 |
| TRIM56   | 1,268552 | 0,000126 |
| SELO     | 1,268534 | 8,58E-06 |
| MDH2     | 1,268188 | 3,31E-09 |
| C11orf73 | 1,267401 | 3,44E-06 |
| COX7C    | 1,267023 | 2,82E-12 |
| YIPF2    | 1,266281 | 3,55E-07 |
| DCP2     | 1,26421  | 5,76E-09 |
| NOA1     | 1,261262 | 3,81E-05 |
| TTC39C   | 1,260415 | 4,51E-05 |
| YDJC     | 1,260406 | 1,67E-06 |
| CARM1    | 1,259114 | 1,28E-09 |
| ARF3     | 1,255603 | 1,56E-08 |
| SMUG1    | 1,253212 | 7,75E-05 |
| TTC8     | 1,252787 | 4,41E-05 |
| TAMM41   | 1,252624 | 3,78E-06 |
| SEH1L    | 1,251557 | 2,12E-07 |
| CTNNBIP1 | 1,24822  | 1,09E-05 |
| KIAA0100 | 1,247515 | 4,07E-05 |
| ATXN1L   | 1,247326 | 5,32E-09 |
| COX4I1   | 1,244938 | 1,31E-11 |
| TRMT5    | 1,244457 | 7,57E-08 |
| ARL8A    | 1,241869 | 8,32E-09 |
| NLK      | 1,240583 | 6,17E-05 |
| GPATCH2  | 1,240273 | 4,75E-07 |
| SLC25A13 | 1,239923 | 4,80E-06 |
| TMEM160  | 1,23824  | 0,00091  |
| BANF1    | 1,238064 | 6,46E-08 |

|          |          |          |
|----------|----------|----------|
| TMED3    | 1,234651 | 8,69E-07 |
| FASN     | 1,233407 | 0,000561 |
| NAGLU    | 1,23316  | 4,25E-05 |
| PDCL3    | 1,232179 | 3,33E-06 |
| CMTM8    | 1,230932 | 0,000475 |
| MAP2K5   | 1,230211 | 7,47E-06 |
| MAZ      | 1,229903 | 9,19E-10 |
| SEL1L    | 1,228654 | 3,88E-11 |
| PSMD7    | 1,228027 | 1,27E-11 |
| UQCRC2   | 1,227683 | 8,01E-12 |
| ARL2     | 1,227584 | 0,000139 |
| ANAPC1   | 1,22668  | 4,03E-09 |
| CHRNA5   | 1,226287 | 1,29E-06 |
| CNNM4    | 1,220082 | 6,47E-06 |
| TOB1     | 1,21928  | 6,48E-05 |
| MKL2     | 1,218097 | 4,25E-06 |
| GNAS     | 1,21703  | 1,61E-11 |
| MRPS33   | 1,216835 | 8,85E-07 |
| BCL2L11  | 1,216296 | 2,33E-05 |
| KAT2A    | 1,215664 | 3,16E-09 |
| NRAS     | 1,214509 | 8,06E-07 |
| PPA2     | 1,213836 | 2,12E-06 |
| NIT2     | 1,21322  | 0,000152 |
| RPIA     | 1,211951 | 1,35E-05 |
| TMEM260  | 1,210796 | 0,000981 |
| RPS2     | 1,210586 | 1,17E-13 |
| NDUFB7   | 1,210264 | 5,70E-10 |
| YES1     | 1,208687 | 2,66E-06 |
| POGZ     | 1,207278 | 2,62E-05 |
| ARHGAP39 | 1,20722  | 0,000349 |
| ITPKB    | 1,206918 | 0,00062  |
| NDST2    | 1,205224 | 0,000567 |
| RASSF7   | 1,20451  | 0,000313 |
| ZBTB41   | 1,199786 | 0,000231 |
| PTPN18   | 1,198427 | 7,59E-08 |
| ZNF83    | 1,197672 | 0,000157 |
| HADH     | 1,197671 | 0,000143 |
| ABCB6    | 1,19658  | 0,00061  |
| NBN      | 1,195848 | 7,26E-09 |
| ZMIZ1    | 1,19577  | 1,88E-05 |
| PAAF1    | 1,195536 | 1,22E-06 |
| NR2F2    | 1,191998 | 1,49E-06 |
| EFTUD1   | 1,188514 | 2,65E-05 |
| AFG3L2   | 1,188442 | 5,17E-10 |
| FAM207A  | 1,187486 | 1,18E-07 |
| PRKRIR   | 1,186497 | 6,31E-08 |
| HMGA1    | 1,18581  | 5,97E-08 |
| ARFRP1   | 1,185502 | 2,34E-05 |
| LRSAM1   | 1,183968 | 0,000534 |
| ZNF107   | 1,183475 | 1,28E-06 |

|          |          |          |
|----------|----------|----------|
| WDR48    | 1,182382 | 0,000702 |
| IFT43    | 1,182074 | 6,97E-05 |
| KDM2A    | 1,181242 | 2,99E-08 |
| TRRAP    | 1,18067  | 3,03E-10 |
| ATP11C   | 1,17982  | 2,45E-05 |
| GCC1     | 1,17953  | 1,91E-07 |
| SLC19A1  | 1,179092 | 2,43E-08 |
| C12orf57 | 1,17871  | 0,000181 |
| DDX41    | 1,178672 | 9,78E-10 |
| ZNHIT3   | 1,177838 | 0,000109 |
| PANK3    | 1,177112 | 3,96E-05 |
| PIGM     | 1,175116 | 0,000358 |
| SETD5    | 1,17488  | 1,23E-05 |
| SREBF2   | 1,174314 | 3,18E-09 |
| HMGB2    | 1,173745 | 0,00062  |
| ZNF444   | 1,172698 | 2,44E-06 |
| HMGCS1   | 1,171385 | 0,000451 |
| TMED10   | 1,171221 | 1,50E-07 |
| GNPNAT1  | 1,169639 | 7,45E-07 |
| LPCAT1   | 1,168685 | 3,72E-06 |
| TSEN54   | 1,16861  | 7,54E-05 |
| BAG5     | 1,168262 | 1,88E-06 |
| KAT8     | 1,167139 | 0,000563 |
| TMEM97   | 1,166472 | 9,30E-08 |
| TMEM106C | 1,165785 | 1,32E-08 |
| KLF5     | 1,165713 | 3,04E-06 |
| ZNF680   | 1,158871 | 0,000651 |
| PSPC1    | 1,157804 | 4,64E-06 |
| LLGL1    | 1,157745 | 0,000265 |
| LRCH4    | 1,156144 | 1,97E-06 |
| FAM89B   | 1,156115 | 3,64E-06 |
| PROSER1  | 1,154066 | 1,36E-09 |
| STX17    | 1,152959 | 4,21E-05 |
| NDUFC1   | 1,15289  | 8,23E-05 |
| MED21    | 1,151209 | 3,98E-05 |
| EMP2     | 1,150063 | 0,000375 |
| RPL32    | 1,149064 | 3,37E-07 |
| EZH2     | 1,148959 | 0,000319 |
| RINT1    | 1,147859 | 0,000118 |
| DGKZ     | 1,147452 | 1,20E-06 |
| SMCHD1   | 1,145716 | 2,76E-06 |
| CRBN     | 1,145158 | 0,000223 |
| MIB1     | 1,143133 | 9,60E-06 |
| RBM4     | 1,142697 | 5,99E-07 |
| POP7     | 1,14261  | 0,000289 |
| RBM8A    | 1,138522 | 6,49E-09 |
| FNBP1L   | 1,137775 | 1,05E-06 |
| ZNF160   | 1,136983 | 0,000103 |
| ZNF213   | 1,134405 | 9,02E-06 |
| BRF1     | 1,132477 | 0,000763 |

|          |          |          |
|----------|----------|----------|
| COX6A1   | 1,132275 | 5,87E-10 |
| NUP107   | 1,131013 | 1,56E-05 |
| SETD1B   | 1,130488 | 5,76E-07 |
| NPRL3    | 1,130262 | 2,40E-08 |
| OXNAD1   | 1,129799 | 0,000546 |
| JTB      | 1,128527 | 1,56E-07 |
| ACSL3    | 1,128116 | 0,00066  |
| PRR7     | 1,127059 | 9,12E-05 |
| C11orf30 | 1,126697 | 2,73E-05 |
| CENPBD1  | 1,125591 | 9,80E-05 |
| LTA4H    | 1,125326 | 4,87E-06 |
| SPIDR    | 1,123675 | 2,78E-06 |
| IGF1R    | 1,123396 | 4,36E-07 |
| MLLT6    | 1,123267 | 8,57E-07 |
| LDB1     | 1,123077 | 1,06E-06 |
| MRPL57   | 1,122237 | 8,76E-08 |
| EEF1G    | 1,120717 | 5,27E-11 |
| KARS     | 1,120598 | 1,37E-07 |
| BRD7     | 1,119594 | 3,70E-07 |
| USP54    | 1,119239 | 2,16E-05 |
| ZNF689   | 1,117082 | 0,000155 |
| AP5S1    | 1,116507 | 2,97E-05 |
| TRAPPC4  | 1,113173 | 3,96E-05 |
| PHPT1    | 1,113136 | 2,18E-07 |
| IRX3     | 1,112743 | 4,98E-06 |
| SPG21    | 1,112516 | 4,95E-08 |
| PPP1R26  | 1,112499 | 0,000332 |
| RPRD1A   | 1,110543 | 2,63E-05 |
| HSDL1    | 1,108184 | 0,000269 |
| AEN      | 1,1079   | 1,46E-08 |
| PDAP1    | 1,107832 | 5,51E-08 |
| RPS6KB2  | 1,107646 | 3,49E-05 |
| PRDM15   | 1,107356 | 0,000208 |
| C7orf73  | 1,104022 | 1,87E-07 |
| SLC44A2  | 1,103166 | 3,37E-06 |
| RNF149   | 1,102819 | 4,61E-06 |
| TXLNG    | 1,102365 | 0,000161 |
| CMTR2    | 1,101752 | 3,01E-05 |
| C16orf58 | 1,101658 | 1,84E-08 |
| EEF2K    | 1,101624 | 2,60E-06 |
| HMGB3    | 1,101622 | 8,19E-10 |
| RGL2     | 1,101375 | 4,79E-05 |
| CBX5     | 1,101168 | 5,00E-06 |
| METTL9   | 1,098987 | 7,50E-07 |
| ZFP36L2  | 1,098478 | 0,000945 |
| FANCD2   | 1,097068 | 0,000196 |
| C9orf114 | 1,096502 | 2,65E-05 |
| GLTSCR1L | 1,096394 | 4,19E-05 |
| DICER1   | 1,091426 | 0,000277 |
| ZNF592   | 1,091135 | 4,54E-06 |

|          |          |          |
|----------|----------|----------|
| ZNF518A  | 1,088821 | 0,000317 |
| VPS52    | 1,086363 | 6,31E-08 |
| MLH3     | 1,085281 | 0,000247 |
| TBC1D9B  | 1,083073 | 4,05E-08 |
| RAD23A   | 1,082126 | 1,88E-07 |
| RBCK1    | 1,081933 | 2,26E-07 |
| NUMA1    | 1,080998 | 2,23E-07 |
| EEF1B2   | 1,080138 | 2,73E-05 |
| TBL2     | 1,079487 | 2,55E-06 |
| SSSCA1   | 1,078989 | 0,000648 |
| VPS51    | 1,077312 | 1,21E-06 |
| SLC9A3R2 | 1,076564 | 1,20E-05 |
| UBQLN4   | 1,076159 | 1,68E-07 |
| KIAA1109 | 1,07615  | 2,82E-05 |
| EIF2B2   | 1,075791 | 2,17E-07 |
| MTHFD1   | 1,074766 | 2,85E-10 |
| RFX7     | 1,074153 | 7,47E-05 |
| ADGRG1   | 1,073976 | 1,86E-06 |
| TMEM258  | 1,073789 | 7,61E-05 |
| PPP4R3A  | 1,073723 | 2,30E-07 |
| BNIP3    | 1,073357 | 2,71E-06 |
| STRA13   | 1,072092 | 6,83E-07 |
| NAA30    | 1,069888 | 1,75E-05 |
| LUC7L2   | 1,068389 | 0,000809 |
| RPRD2    | 1,067892 | 7,04E-07 |
| CBLB     | 1,067084 | 0,00025  |
| DHRS7    | 1,06575  | 1,01E-05 |
| PEX13    | 1,064849 | 0,000217 |
| GOT1     | 1,064783 | 8,50E-07 |
| SMIM20   | 1,063712 | 0,000486 |
| TATDN1   | 1,063499 | 1,07E-05 |
| NEO1     | 1,062883 | 1,18E-06 |
| LSS      | 1,06196  | 0,000408 |
| DBI      | 1,061353 | 9,83E-08 |
| TSFM     | 1,061244 | 4,10E-06 |
| PEBP1    | 1,060848 | 1,34E-08 |
| CLN6     | 1,05914  | 6,54E-08 |
| USP34    | 1,059055 | 2,05E-08 |
| MLH1     | 1,058634 | 3,78E-06 |
| SRSF8    | 1,058024 | 0,000448 |
| APH1A    | 1,056461 | 7,58E-09 |
| ATP5L    | 1,055816 | 1,21E-07 |
| TOP1MT   | 1,055697 | 9,00E-08 |
| GLRX5    | 1,055507 | 7,79E-05 |
| TEX264   | 1,055287 | 3,47E-05 |
| RBFA     | 1,053769 | 0,000118 |
| DNPEP    | 1,052996 | 4,68E-07 |
| PYCRL    | 1,05122  | 8,46E-05 |
| MED13    | 1,050917 | 3,70E-08 |
| EIF4B    | 1,050278 | 5,28E-10 |

|           |          |          |
|-----------|----------|----------|
| VPS25     | 1,050161 | 1,73E-06 |
| SGSM2     | 1,049582 | 0,000562 |
| PHKG2     | 1,049461 | 0,000222 |
| TEAD3     | 1,049099 | 0,000445 |
| BUD31     | 1,048871 | 1,09E-07 |
| KBTBD6    | 1,047985 | 0,000244 |
| CAMKK2    | 1,043704 | 2,06E-06 |
| BRD3      | 1,043665 | 1,86E-05 |
| NUCKS1    | 1,042526 | 1,61E-07 |
| ZNF32     | 1,039959 | 0,000244 |
| HECTD4    | 1,0396   | 0,000111 |
| RMDN1     | 1,038781 | 2,60E-05 |
| SLC38A1   | 1,036229 | 1,55E-07 |
| RFNG      | 1,036015 | 0,000884 |
| TAF6      | 1,034226 | 9,20E-07 |
| PSMB1     | 1,03396  | 5,40E-06 |
| DAG1      | 1,033374 | 6,69E-05 |
| FKBP5     | 1,033039 | 0,000221 |
| NETO2     | 1,032448 | 4,09E-06 |
| SLC29A1   | 1,031361 | 3,75E-05 |
| RPL31     | 1,029152 | 8,20E-06 |
| RTN3      | 1,028056 | 5,30E-06 |
| PACS1     | 1,026227 | 1,11E-05 |
| NDUFB2    | 1,025784 | 1,01E-06 |
| COPS6     | 1,025062 | 7,88E-08 |
| IDE       | 1,024741 | 2,34E-05 |
| FAM111B   | 1,024129 | 0,000497 |
| TTLL5     | 1,022598 | 3,68E-05 |
| RHBDF2    | 1,021422 | 0,000172 |
| ZNF629    | 1,021301 | 4,37E-06 |
| AGAP2-AS1 | 1,018671 | 0,000284 |
| TUBGCP2   | 1,016625 | 3,60E-06 |
| ZNF252P   | 1,014933 | 2,98E-06 |
| SHFM1     | 1,0144   | 8,89E-07 |
| PTMS      | 1,014124 | 9,62E-05 |
| ANAPC15   | 1,013963 | 1,14E-05 |
| TOR3A     | 1,013155 | 9,29E-06 |
| SAMD1     | 1,01256  | 4,91E-05 |
| ASCC1     | 1,011985 | 2,97E-05 |
| ALDH7A1   | 1,011626 | 2,22E-06 |
| MICU2     | 1,010552 | 3,44E-05 |
| TP53I13   | 1,009589 | 0,000876 |
| HMGCR     | 1,008632 | 9,69E-06 |
| MON1B     | 1,005775 | 3,98E-05 |
| SP1       | 1,004844 | 1,77E-06 |
| PAXIP1    | 1,004021 | 0,000157 |
| MIF       | 1,003984 | 4,95E-07 |
| GATC      | 1,002518 | 6,24E-05 |
| WBSCR22   | 1,002485 | 8,04E-07 |
| KMT2E     | 1,002206 | 1,97E-05 |

|          |          |          |
|----------|----------|----------|
| PHB2     | 1,001821 | 8,79E-08 |
| TRAPPC13 | 1,001748 | 0,00057  |
| C5orf30  | 0,999577 | 0,000139 |
| FAM136A  | 0,998542 | 5,86E-07 |
| PFDN5    | 0,996741 | 5,60E-07 |
| IREB2    | 0,995943 | 0,000116 |
| TPT1     | 0,994465 | 5,56E-05 |
| POR      | 0,993755 | 2,42E-05 |
| PPM1B    | 0,992503 | 0,000681 |
| TRIP6    | 0,9923   | 5,68E-06 |
| PCNX     | 0,991025 | 2,75E-05 |
| ZNF282   | 0,991009 | 2,67E-06 |
| PPIL2    | 0,990156 | 4,91E-05 |
| ARID2    | 0,986893 | 0,000459 |
| METTL2A  | 0,986141 | 8,19E-05 |
| ZNF358   | 0,984665 | 0,000105 |
| TIMELESS | 0,984533 | 3,53E-05 |
| FOXRED2  | 0,984423 | 0,000149 |
| ARMT1    | 0,984301 | 4,25E-05 |
| SMURF1   | 0,983237 | 8,26E-06 |
| OTUB1    | 0,980276 | 2,73E-06 |
| TADA3    | 0,978652 | 1,04E-06 |
| GIPC1    | 0,977224 | 0,000599 |
| RNF115   | 0,976446 | 6,37E-05 |
| RPL36AL  | 0,974743 | 7,84E-05 |
| ECSIT    | 0,974272 | 3,19E-05 |
| MRPL41   | 0,972891 | 1,80E-05 |
| RPL37    | 0,972885 | 0,000259 |
| MED20    | 0,970206 | 0,000277 |
| PMVK     | 0,969769 | 0,000376 |
| FBXO21   | 0,966976 | 0,000336 |
| MTMR12   | 0,966476 | 0,000622 |
| MTMR3    | 0,966009 | 0,000249 |
| TRAK2    | 0,965676 | 0,000177 |
| PCF11    | 0,965644 | 0,000546 |
| SERPINB6 | 0,960136 | 4,95E-07 |
| IFT46    | 0,960054 | 3,30E-05 |
| ABHD16A  | 0,957914 | 0,000335 |
| POLR1B   | 0,955994 | 4,13E-05 |
| HSPB1    | 0,955718 | 0,000203 |
| TOP2B    | 0,955612 | 8,18E-07 |
| SMARCA4  | 0,955064 | 0,000195 |
| ATP5I    | 0,954863 | 1,48E-06 |
| GPR137   | 0,94989  | 0,000525 |
| CELSR1   | 0,947332 | 0,000785 |
| RNF181   | 0,947309 | 0,000141 |
| TELO2    | 0,947038 | 3,03E-05 |
| BCKDHA   | 0,94577  | 0,000222 |
| SS18     | 0,943029 | 1,18E-05 |
| FGFR1OP  | 0,942938 | 0,000555 |



|          |          |          |
|----------|----------|----------|
| FBXL14   | 0,94258  | 0,000875 |
| SLC3A2   | 0,941889 | 5,68E-07 |
| LMNB1    | 0,941614 | 1,72E-05 |
| MTMR4    | 0,941188 | 4,87E-05 |
| LTBP1    | 0,941018 | 7,69E-06 |
| DNAJA2   | 0,940069 | 0,000973 |
| ZBTB1    | 0,939398 | 8,62E-06 |
| POLR2I   | 0,93912  | 8,72E-05 |
| AGPAT3   | 0,935995 | 0,000185 |
| ARPC1A   | 0,935697 | 0,000133 |
| VPS37C   | 0,932631 | 0,000282 |
| CFDP1    | 0,931638 | 2,94E-05 |
| MBTPS1   | 0,930695 | 1,82E-06 |
| AAAS     | 0,930616 | 1,28E-05 |
| PRPSAP1  | 0,930435 | 9,92E-05 |
| ORC2     | 0,929908 | 0,000732 |
| MRPL49   | 0,929882 | 4,06E-05 |
| FAM127B  | 0,927955 | 3,38E-06 |
| NELFCD   | 0,927428 | 6,11E-05 |
| KAT5     | 0,926862 | 0,00013  |
| PSMD9    | 0,926124 | 9,94E-05 |
| IQCE     | 0,926089 | 2,32E-05 |
| ESD      | 0,924728 | 8,72E-07 |
| JAGN1    | 0,924704 | 8,30E-05 |
| TSC2     | 0,924692 | 0,000173 |
| ZFP41    | 0,924189 | 0,000418 |
| SSNA1    | 0,9241   | 9,72E-05 |
| IMMT     | 0,917551 | 1,15E-06 |
| EPB41L1  | 0,914588 | 0,000472 |
| MRPL21   | 0,912379 | 2,13E-05 |
| RUSC1    | 0,911025 | 0,000237 |
| MRPL16   | 0,910663 | 0,000641 |
| TIMM10B  | 0,910281 | 0,000155 |
| CNOT11   | 0,910182 | 1,28E-05 |
| CANX     | 0,909323 | 3,24E-06 |
| MRPL35   | 0,908403 | 6,01E-05 |
| BTG1     | 0,908324 | 0,000232 |
| IMP3     | 0,906248 | 1,13E-05 |
| TRAF7    | 0,905173 | 2,09E-06 |
| KIAA0196 | 0,905044 | 1,83E-05 |
| CHD1L    | 0,904507 | 0,000386 |
| LAGE3    | 0,903135 | 0,000125 |
| ZNF24    | 0,902879 | 0,000192 |
| HIP1     | 0,902595 | 0,000164 |
| LRRC45   | 0,902299 | 0,000894 |
| PRKAG1   | 0,901408 | 0,000229 |
| SMARCC1  | 0,898987 | 2,80E-06 |
| DIRAS1   | 0,898094 | 0,000925 |
| DDB1     | 0,897938 | 0,000447 |
| TUG1     | 0,89793  | 7,42E-06 |

|          |          |          |
|----------|----------|----------|
| PGP      | 0,897834 | 0,000161 |
| TCEB2    | 0,896393 | 0,00037  |
| PIGU     | 0,896053 | 0,000286 |
| SEPHS2   | 0,894707 | 1,47E-05 |
| DNAJC2   | 0,893511 | 0,000116 |
| MYBL2    | 0,890702 | 6,32E-07 |
| NUDT16L1 | 0,890466 | 0,000466 |
| HNRNPF   | 0,888554 | 9,39E-06 |
| CAMSAP1  | 0,887987 | 2,68E-05 |
| SEPHS1   | 0,887025 | 0,000761 |
| C19orf43 | 0,88638  | 4,36E-07 |
| ZNF618   | 0,885956 | 5,08E-06 |
| PGLS     | 0,885387 | 0,000348 |
| CCZ1B    | 0,882088 | 0,000188 |
| CFLAR    | 0,879666 | 0,000618 |
| NDUFB9   | 0,879323 | 0,000939 |
| ATP5H    | 0,875075 | 0,000417 |
| ATRAID   | 0,873051 | 2,15E-05 |
| RPS23    | 0,868589 | 0,000612 |
| SPAG7    | 0,864686 | 0,000644 |
| ZNF398   | 0,863334 | 8,16E-05 |
| GGCX     | 0,861674 | 0,000158 |
| ESYT1    | 0,85753  | 1,90E-06 |
| PMPCB    | 0,857222 | 9,16E-05 |
| MRGBP    | 0,856449 | 0,000349 |
| MRPS21   | 0,855905 | 8,33E-06 |
| LAMTOR1  | 0,855674 | 0,000823 |
| CNOT2    | 0,855237 | 2,26E-05 |
| GIT1     | 0,854883 | 2,98E-05 |
| DNAJC10  | 0,853824 | 0,000389 |
| CDC42SE2 | 0,853447 | 0,000212 |
| DECR1    | 0,852164 | 0,000271 |
| UBXN4    | 0,851857 | 1,90E-05 |
| SYAP1    | 0,851815 | 0,000238 |
| CDC42BPB | 0,850083 | 1,27E-05 |
| CTCF     | 0,849429 | 0,00023  |
| COX8A    | 0,848171 | 1,34E-05 |
| DLST     | 0,840485 | 0,000137 |
| RNMTL1   | 0,837469 | 0,000816 |
| PTPN2    | 0,837246 | 0,000295 |
| RUFY1    | 0,834904 | 0,0007   |
| ANXA7    | 0,834265 | 1,98E-05 |
| SORD     | 0,834089 | 1,80E-05 |
| TSTA3    | 0,833885 | 5,26E-05 |
| RPL34    | 0,8336   | 0,000162 |
| RPSA     | 0,831109 | 8,05E-07 |
| ARFGAP2  | 0,829647 | 0,000223 |
| TAF11    | 0,827676 | 0,000649 |
| FKBP3    | 0,827524 | 8,42E-05 |
| CASP2    | 0,825571 | 0,000185 |

|          |          |          |
|----------|----------|----------|
| SUDS3    | 0,825054 | 0,000514 |
| ADK      | 0,820405 | 0,000203 |
| FAU      | 0,818349 | 9,29E-06 |
| HSBP1    | 0,816899 | 2,84E-05 |
| MARCKSL1 | 0,814719 | 5,95E-06 |
| DYNLL2   | 0,813319 | 2,94E-05 |
| PRRC2B   | 0,811679 | 0,000393 |
| ARL6IP1  | 0,811285 | 0,000114 |
| CNOT8    | 0,811104 | 0,000308 |
| TMEM167A | 0,808604 | 0,000974 |
| FNBP1    | 0,803591 | 0,000464 |
| TK1      | 0,803222 | 4,10E-05 |
| CUEDC2   | 0,801401 | 0,000218 |
| MKKS     | 0,800866 | 0,000431 |
| RFC2     | 0,80081  | 5,22E-05 |
| MKRN1    | 0,800318 | 0,000536 |
| RPL3     | 0,79624  | 0,000414 |
| SRCAP    | 0,793808 | 8,46E-06 |
| IMP4     | 0,78941  | 3,29E-05 |
| KIAA1191 | 0,788241 | 0,000106 |
| WDR61    | 0,785348 | 0,000456 |
| DLG5     | 0,783641 | 5,98E-05 |
| SNTB1    | 0,781619 | 0,000726 |
| AP3B1    | 0,780533 | 0,000879 |
| RPL14    | 0,77918  | 0,000162 |
| MRPL4    | 0,775387 | 0,000144 |
| GTPBP6   | 0,774347 | 0,0007   |
| SPATS2   | 0,773552 | 0,000856 |
| RABL6    | 0,773093 | 0,000296 |
| KMT2D    | 0,771455 | 3,54E-05 |
| LLPH     | 0,769458 | 0,000225 |
| CAND1    | 0,764578 | 0,000292 |
| MRPS34   | 0,76367  | 0,000185 |
| NAA60    | 0,761237 | 0,000359 |
| PPP1R14B | 0,760681 | 0,000184 |
| YIPF3    | 0,76062  | 0,000322 |
| SMYD5    | 0,760582 | 0,000942 |
| DCAF7    | 0,758469 | 0,000581 |
| CFL1     | 0,758327 | 0,000162 |
| SNRPE    | 0,755952 | 3,96E-05 |
| C12orf10 | 0,739937 | 0,001003 |
| NSUN5    | 0,73922  | 0,001    |
| SIN3A    | 0,735559 | 0,000393 |
| NDUFV3   | 0,734394 | 0,000432 |
| SCAF11   | 0,730003 | 0,000531 |
| FEM1B    | 0,728481 | 0,000593 |
| NGRN     | 0,723681 | 0,000512 |
| SAP130   | 0,714698 | 0,000242 |
| ZMYND8   | 0,712124 | 0,000779 |
| RPL8     | 0,708618 | 2,71E-05 |

|          |          |          |
|----------|----------|----------|
| FDPS     | 0,69666  | 0,000176 |
| PSMC2    | 0,695901 | 0,00056  |
| ATL3     | 0,693759 | 0,00076  |
| TDG      | 0,692034 | 0,000735 |
| HN1L     | 0,691199 | 0,000223 |
| H3F3B    | 0,690924 | 0,000143 |
| IST1     | 0,690065 | 0,000572 |
| GDI2     | 0,689826 | 0,000833 |
| CTNNA1   | 0,685507 | 0,000181 |
| NDUFA13  | 0,680234 | 0,000629 |
| LRPPRC   | 0,669189 | 0,000151 |
| COX5A    | 0,667661 | 0,000847 |
| CCNF     | 0,658456 | 0,001008 |
| LAPTM4B  | 0,644746 | 0,000742 |
| FBR5     | 0,641975 | 0,000534 |
| TOP1     | 0,641314 | 0,000216 |
| BPTF     | 0,639529 | 0,000439 |
| PSMD4    | 0,637512 | 0,000361 |
| EIF1AX   | 0,633959 | 0,000774 |
| USP39    | 0,633232 | 0,000806 |
| GNB2L1   | 0,63186  | 0,000478 |
| HMGB1    | 0,619785 | 0,000389 |
| PABPC1   | 0,605979 | 0,000403 |
| CCT5     | -0,61262 | 0,00056  |
| AATF     | -0,61427 | 0,000939 |
| PSMD11   | -0,62376 | 0,000798 |
| ETF1     | -0,63006 | 0,000694 |
| TIMM50   | -0,63618 | 0,000724 |
| SRF      | -0,64048 | 0,000836 |
| SYNCRIP  | -0,64329 | 0,000843 |
| UBE2M    | -0,64342 | 0,000867 |
| C11orf58 | -0,64462 | 0,000584 |
| SAE1     | -0,65015 | 0,000413 |
| KXD1     | -0,65023 | 0,000927 |
| BOP1     | -0,65236 | 0,000422 |
| PPIA     | -0,65698 | 0,000144 |
| RRP36    | -0,65988 | 0,000705 |
| NCKAP1   | -0,67624 | 0,000557 |
| NDC1     | -0,67766 | 0,000892 |
| RPL11    | -0,68088 | 8,19E-05 |
| ZBTB4    | -0,6876  | 0,000999 |
| PAF1     | -0,69443 | 0,000149 |
| HSF1     | -0,69548 | 8,83E-05 |
| NUP93    | -0,69981 | 0,000404 |
| RRP7A    | -0,69984 | 0,000752 |
| HNRNPA2B | -0,7046  | 8,26E-05 |
| PSMD13   | -0,70629 | 0,000261 |
| GMPS     | -0,7073  | 0,00035  |
| ASXL1    | -0,71032 | 0,00025  |
| STIP1    | -0,71112 | 0,000437 |

|          |          |          |
|----------|----------|----------|
| HNRNPU   | -0,71833 | 0,000991 |
| SLC35E1  | -0,7188  | 0,000792 |
| IDH3A    | -0,71897 | 0,000519 |
| SEC63    | -0,721   | 0,000115 |
| ADIPOR2  | -0,72358 | 0,000579 |
| PSMD3    | -0,73079 | 4,00E-05 |
| PPP1R37  | -0,73422 | 0,000624 |
| MDN1     | -0,73617 | 0,00037  |
| PARP1    | -0,73819 | 0,000181 |
| MFAP3    | -0,7412  | 0,000513 |
| CTNNBL1  | -0,74162 | 0,000233 |
| EIF4G3   | -0,74176 | 0,000409 |
| MFSD12   | -0,74901 | 0,000319 |
| FSCN1    | -0,74965 | 0,000406 |
| TOMM40   | -0,75182 | 1,84E-05 |
| ARPC5L   | -0,75272 | 0,000326 |
| SAR1A    | -0,75325 | 0,000223 |
| C6orf89  | -0,75466 | 0,000392 |
| YTHDF2   | -0,75521 | 7,48E-05 |
| MAP4     | -0,75789 | 4,95E-05 |
| SLC31A1  | -0,75803 | 0,000262 |
| MAGED2   | -0,75831 | 0,000365 |
| RTN4     | -0,75954 | 0,000402 |
| PHRF1    | -0,75984 | 7,92E-05 |
| SNRNP70  | -0,76055 | 0,000182 |
| TFG      | -0,76241 | 8,16E-05 |
| DHX30    | -0,76385 | 0,000177 |
| RANGAP1  | -0,76461 | 9,80E-05 |
| DDX52    | -0,76947 | 0,000995 |
| SENP5    | -0,7711  | 0,000172 |
| COPS3    | -0,77156 | 0,000228 |
| SF3A1    | -0,77527 | 0,00015  |
| GAPVD1   | -0,77707 | 0,00024  |
| H2AFV    | -0,77807 | 0,000429 |
| BAK1     | -0,78021 | 0,000153 |
| EIF2S3   | -0,78168 | 9,72E-06 |
| PSMA7    | -0,78293 | 1,21E-05 |
| DOT1L    | -0,78326 | 0,000618 |
| BABAM1   | -0,78608 | 0,000824 |
| NPC1     | -0,78775 | 0,000538 |
| UQCC1    | -0,78965 | 0,000999 |
| GARS     | -0,79127 | 4,11E-05 |
| EEF1A1   | -0,79127 | 1,81E-05 |
| PAFAH1B1 | -0,79159 | 2,01E-05 |
| SEC62    | -0,79207 | 7,21E-05 |
| CD99     | -0,7929  | 0,000899 |
| POLRMT   | -0,79328 | 0,00014  |
| DTL      | -0,7936  | 0,000797 |
| RERE     | -0,79451 | 5,43E-05 |
| DHX37    | -0,79518 | 3,43E-05 |

|         |          |          |
|---------|----------|----------|
| XPO7    | -0,79853 | 0,000393 |
| COX7A2  | -0,80113 | 0,000708 |
| KIF3B   | -0,80124 | 0,000848 |
| ENTPD6  | -0,80216 | 0,000321 |
| TPD52L2 | -0,80257 | 4,60E-05 |
| MTCH1   | -0,80278 | 0,000121 |
| CCAR2   | -0,80289 | 2,27E-05 |
| DHX36   | -0,8033  | 0,000154 |
| SMG9    | -0,8035  | 0,000128 |
| B4GALT1 | -0,80719 | 2,50E-05 |
| PRIM2   | -0,80724 | 0,000758 |
| FMR1    | -0,8109  | 0,000964 |
| MTDH    | -0,81108 | 0,000286 |
| NUP50   | -0,81302 | 0,000478 |
| TSSC4   | -0,81656 | 0,000823 |
| PDCD5   | -0,81692 | 0,000156 |
| USP48   | -0,81754 | 0,000281 |
| PSMB3   | -0,81978 | 0,000173 |
| SYF2    | -0,82159 | 0,00073  |
| TGS1    | -0,82296 | 0,000247 |
| COX7B   | -0,82606 | 4,86E-05 |
| PPIH    | -0,82654 | 0,00034  |
| NCAPH2  | -0,82728 | 5,23E-05 |
| MRPL34  | -0,828   | 0,000222 |
| RAB27A  | -0,82892 | 0,000675 |
| RANBP3  | -0,82941 | 0,000213 |
| SLC20A1 | -0,82987 | 7,06E-05 |
| RCN1    | -0,83204 | 1,28E-05 |
| CENPO   | -0,83384 | 0,000567 |
| ZNF106  | -0,83465 | 2,80E-05 |
| TANC1   | -0,83628 | 0,000154 |
| GTSE1   | -0,83684 | 0,000619 |
| SRP14   | -0,83706 | 0,000185 |
| RARS    | -0,83781 | 0,000368 |
| CHKA    | -0,83948 | 0,000113 |
| SENP6   | -0,84055 | 0,000631 |
| LEMD2   | -0,84096 | 1,44E-05 |
| GSK3A   | -0,84228 | 2,61E-05 |
| IFT57   | -0,84648 | 0,000121 |
| ATR     | -0,84858 | 0,000164 |
| DBR1    | -0,84859 | 0,000581 |
| SERBP1  | -0,85005 | 0,000395 |
| KBTBD2  | -0,85176 | 5,28E-05 |
| HOMER3  | -0,8521  | 0,000168 |
| TRIM32  | -0,8522  | 0,001005 |
| GTPBP1  | -0,85383 | 0,000813 |
| ATXN2   | -0,85396 | 0,000217 |
| DCAF10  | -0,85411 | 0,000493 |
| MAP2K1  | -0,85474 | 2,66E-05 |
| RCC1    | -0,85491 | 1,39E-05 |

|           |          |          |
|-----------|----------|----------|
| EIF3I     | -0,85558 | 6,80E-05 |
| RTF1      | -0,85562 | 3,21E-05 |
| DCUN1D5   | -0,85634 | 0,000299 |
| RRP9      | -0,85669 | 6,81E-05 |
| POLR2H    | -0,85716 | 4,59E-05 |
| GTF2H1    | -0,85813 | 0,000221 |
| AGPAT5    | -0,85845 | 0,000285 |
| EIF3M     | -0,86032 | 1,22E-05 |
| VEZF1     | -0,86181 | 3,46E-05 |
| RALA      | -0,86192 | 0,000306 |
| ERO1A     | -0,86305 | 0,000165 |
| NEDD4     | -0,86363 | 0,000996 |
| DDHD2     | -0,86375 | 0,00057  |
| NCSTN     | -0,86411 | 0,000506 |
| RSPRY1    | -0,86712 | 0,000433 |
| MRPL20    | -0,86931 | 0,000309 |
| MLLT1     | -0,86996 | 1,51E-05 |
| QRSL1     | -0,8706  | 0,000597 |
| SNRPB2    | -0,87282 | 9,34E-06 |
| GTF2F1    | -0,87366 | 2,40E-05 |
| PSMC4     | -0,87381 | 7,33E-07 |
| NCL       | -0,87394 | 7,70E-07 |
| TYMS      | -0,87402 | 1,55E-05 |
| TNRC6A    | -0,87505 | 0,000317 |
| STOML2    | -0,87545 | 2,56E-06 |
| ACKR3     | -0,87701 | 1,54E-05 |
| BCCIP     | -0,8781  | 7,14E-06 |
| RNF111    | -0,88005 | 0,000634 |
| FAM3C     | -0,88089 | 0,000205 |
| APIP      | -0,88121 | 0,000963 |
| DUSP3     | -0,8813  | 8,33E-05 |
| VBP1      | -0,88138 | 2,80E-05 |
| GDI1      | -0,88209 | 2,72E-05 |
| UMPS      | -0,88238 | 9,02E-05 |
| HIF1A     | -0,88301 | 3,75E-05 |
| SLC35F6   | -0,88392 | 0,000739 |
| PPIE      | -0,88446 | 9,79E-05 |
| ATG12     | -0,88453 | 0,000289 |
| TAB2      | -0,88463 | 0,000286 |
| PSMC3IP   | -0,88576 | 0,000774 |
| NUP62     | -0,88665 | 7,12E-05 |
| LINC01420 | -0,88706 | 0,000522 |
| TMED4     | -0,88748 | 7,00E-05 |
| COPS5     | -0,88775 | 0,000596 |
| UBAP2     | -0,88811 | 0,000238 |
| ZSWIM6    | -0,88972 | 0,000693 |
| ZZZ3      | -0,88977 | 0,000508 |
| NOC4L     | -0,89036 | 5,84E-05 |
| PELO      | -0,89121 | 0,000215 |
| TMEM2     | -0,89201 | 0,000936 |

|         |          |          |
|---------|----------|----------|
| TBC1D20 | -0,89324 | 0,00056  |
| CARKD   | -0,89426 | 0,000587 |
| KPNA2   | -0,89441 | 1,41E-05 |
| ERP44   | -0,8951  | 3,30E-05 |
| PRPF4   | -0,89622 | 6,24E-06 |
| RAC1    | -0,89669 | 1,53E-07 |
| GLIS2   | -0,897   | 0,000493 |
| CUL1    | -0,89761 | 1,40E-05 |
| TMEM57  | -0,89807 | 0,000754 |
| PSMA1   | -0,89903 | 5,16E-06 |
| TOR1B   | -0,90038 | 0,000283 |
| KIF20B  | -0,90203 | 3,90E-05 |
| PROSC   | -0,90241 | 0,000707 |
| RNF4    | -0,90285 | 7,14E-06 |
| DVL1    | -0,90315 | 7,02E-05 |
| TUBA1C  | -0,90577 | 1,85E-06 |
| RPF2    | -0,90748 | 0,000233 |
| ACER3   | -0,90794 | 0,000213 |
| TBRG4   | -0,90924 | 0,000306 |
| GAK     | -0,91028 | 1,38E-06 |
| DESI1   | -0,91035 | 2,64E-05 |
| HEBP1   | -0,91323 | 0,000122 |
| NRD1    | -0,91475 | 1,21E-05 |
| FAM50A  | -0,91484 | 6,25E-06 |
| UBE2A   | -0,91524 | 4,28E-06 |
| EXOSC9  | -0,91583 | 0,000342 |
| CDCA8   | -0,91589 | 0,000874 |
| ZDHC5   | -0,91593 | 3,02E-06 |
| TAF12   | -0,91593 | 0,000192 |
| VPS39   | -0,9162  | 0,000788 |
| GOLGA7  | -0,91633 | 6,38E-05 |
| USP12   | -0,91763 | 0,000431 |
| DLGAP4  | -0,91856 | 2,16E-05 |
| SGTA    | -0,91868 | 9,93E-07 |
| SRRM1   | -0,91881 | 8,95E-05 |
| GSR     | -0,91986 | 0,000177 |
| SSBP3   | -0,9206  | 8,41E-05 |
| CWC22   | -0,92138 | 0,000166 |
| HAUS8   | -0,92151 | 0,000942 |
| HGS     | -0,92252 | 2,85E-06 |
| XPO6    | -0,92285 | 3,74E-07 |
| ZNF644  | -0,92311 | 3,92E-05 |
| CCDC97  | -0,92343 | 1,31E-05 |
| KHSRP   | -0,92466 | 3,28E-06 |
| MCM8    | -0,92507 | 0,000103 |
| ATG16L1 | -0,92603 | 0,000883 |
| ITSN1   | -0,92625 | 0,001003 |
| TMEM222 | -0,929   | 5,26E-05 |
| STRAP   | -0,93011 | 2,38E-05 |
| UBQLN1  | -0,93018 | 9,52E-07 |



|          |          |          |
|----------|----------|----------|
| NDEL1    | -0,9316  | 0,000127 |
| RBPMS    | -0,93167 | 0,00012  |
| SIK3     | -0,93287 | 2,67E-05 |
| TUBB6    | -0,93746 | 0,000128 |
| LRRC59   | -0,93782 | 6,80E-06 |
| DUSP14   | -0,93791 | 7,50E-05 |
| ANKRD27  | -0,93865 | 7,07E-05 |
| BET1L    | -0,93988 | 0,00025  |
| ZHX1     | -0,94032 | 0,000799 |
| ABCF1    | -0,94142 | 0,000164 |
| MRPL13   | -0,94283 | 7,89E-05 |
| PLEKHO1  | -0,94307 | 9,11E-06 |
| RAB3GAP2 | -0,94429 | 2,96E-05 |
| URGCP    | -0,94448 | 0,000987 |
| LSM10    | -0,94494 | 0,00045  |
| GMNN     | -0,94582 | 3,42E-05 |
| SNRPA1   | -0,94633 | 1,18E-06 |
| UBE2E3   | -0,9476  | 1,39E-05 |
| RYK      | -0,94813 | 0,00021  |
| UBN1     | -0,94827 | 1,86E-06 |
| NEK2     | -0,9483  | 0,000569 |
| SLC39A7  | -0,94835 | 7,17E-05 |
| PEF1     | -0,94852 | 3,87E-06 |
| RGS3     | -0,94922 | 0,000802 |
| RNGTT    | -0,94954 | 0,000184 |
| ZW10     | -0,94969 | 0,000261 |
| SF3B6    | -0,95055 | 0,000508 |
| PEAK1    | -0,9506  | 0,000148 |
| ZNF584   | -0,95075 | 0,000602 |
| PTDSS1   | -0,9512  | 0,00063  |
| C9orf3   | -0,95134 | 0,000551 |
| GPATCH4  | -0,9516  | 1,78E-05 |
| MOSPD1   | -0,95243 | 0,000395 |
| RPP30    | -0,95278 | 4,82E-05 |
| DDX17    | -0,95368 | 7,62E-08 |
| SMC5     | -0,95768 | 0,000584 |
| NUDCD3   | -0,95769 | 2,66E-06 |
| PLXNA1   | -0,95822 | 2,64E-05 |
| ARHGEF1  | -0,959   | 2,14E-05 |
| TMED7    | -0,96136 | 1,09E-05 |
| DDX47    | -0,96328 | 3,05E-06 |
| MTG2     | -0,96386 | 8,19E-06 |
| TIMM13   | -0,96592 | 7,87E-06 |
| RHOA     | -0,96614 | 4,42E-07 |
| MED27    | -0,96714 | 0,000166 |
| UBR3     | -0,96741 | 0,000613 |
| ORMDL1   | -0,96753 | 2,18E-05 |
| FBXL3    | -0,96813 | 4,21E-05 |
| CDCA2    | -0,96879 | 0,000607 |
| ANKRD40  | -0,96966 | 0,000106 |

|           |          |          |
|-----------|----------|----------|
| TRMT2A    | -0,9739  | 2,72E-05 |
| TXNDC12   | -0,97467 | 3,53E-06 |
| YBX1      | -0,97539 | 0,000714 |
| PARK7     | -0,97557 | 2,98E-05 |
| COASY     | -0,97573 | 2,30E-06 |
| HERC2     | -0,97575 | 4,18E-07 |
| KIDINS220 | -0,97583 | 3,77E-07 |
| C1orf174  | -0,97707 | 0,000851 |
| LACTB2    | -0,97728 | 0,000981 |
| MTMR9     | -0,97748 | 0,00013  |
| GNA11     | -0,97768 | 3,25E-06 |
| LPGAT1    | -0,97786 | 0,000495 |
| MUM1      | -0,97823 | 0,00012  |
| TRMT61B   | -0,97973 | 0,000729 |
| TAGLN2    | -0,97988 | 1,89E-08 |
| CNOT7     | -0,98027 | 3,23E-06 |
| ATAD3A    | -0,98059 | 1,05E-07 |
| PRKD3     | -0,98074 | 2,98E-05 |
| NDFIP2    | -0,98113 | 0,000282 |
| AUTS2     | -0,98136 | 1,26E-05 |
| BFAR      | -0,98164 | 9,98E-06 |
| B3GALNT1  | -0,98245 | 0,000325 |
| TBC1D13   | -0,98247 | 0,000177 |
| MAP1S     | -0,98323 | 0,000857 |
| PDIA5     | -0,98419 | 0,000106 |
| SPOP      | -0,98454 | 0,000201 |
| TTI2      | -0,98472 | 0,000592 |
| FRG1      | -0,98581 | 0,0008   |
| DYNLRB1   | -0,98587 | 1,39E-05 |
| NFIC      | -0,98606 | 2,25E-07 |
| TP53BP1   | -0,98855 | 0,000102 |
| ZMPSTE24  | -0,98876 | 0,000239 |
| GOSR1     | -0,9895  | 2,63E-05 |
| NUAK1     | -0,98977 | 0,000984 |
| NDUFA10   | -0,99101 | 2,82E-07 |
| URB1      | -0,99329 | 3,10E-06 |
| IFNGR1    | -0,9935  | 0,000483 |
| CUL4A     | -0,99434 | 2,06E-05 |
| PTPN1     | -0,99501 | 1,96E-05 |
| WDFY1     | -0,99525 | 2,03E-05 |
| VKORC1L1  | -0,9953  | 8,29E-07 |
| UBLCP1    | -0,99545 | 9,81E-06 |
| OPA3      | -0,99562 | 2,46E-05 |
| ENAH      | -0,99609 | 0,000296 |
| FH        | -0,99726 | 6,98E-07 |
| MCFD2     | -0,99787 | 8,19E-07 |
| BRI3      | -0,99833 | 2,40E-06 |
| TUSC1     | -0,99846 | 0,000283 |
| CHMP5     | -0,99933 | 0,00025  |
| SZRD1     | -0,99935 | 5,11E-05 |

|          |          |          |
|----------|----------|----------|
| USE1     | -1,00086 | 0,000731 |
| FABP5    | -1,00105 | 2,76E-06 |
| GOLGA4   | -1,00141 | 3,67E-05 |
| ISCA1    | -1,00153 | 1,09E-05 |
| EXOSC2   | -1,00226 | 1,15E-06 |
| UBE2J1   | -1,00327 | 7,96E-05 |
| DNTTIP1  | -1,00362 | 0,000111 |
| PARP2    | -1,00406 | 1,29E-05 |
| HPCAL1   | -1,00497 | 9,84E-06 |
| TCP1     | -1,00532 | 2,48E-07 |
| FAH      | -1,00604 | 1,33E-05 |
| COPB1    | -1,0062  | 1,95E-07 |
| DSCR3    | -1,0062  | 0,000199 |
| FBXO46   | -1,00732 | 0,000195 |
| FTSJ1    | -1,00846 | 3,05E-06 |
| CHMP7    | -1,00984 | 8,02E-07 |
| AK2      | -1,01003 | 2,11E-08 |
| FBXL18   | -1,01012 | 9,39E-06 |
| FARP1    | -1,01098 | 1,59E-05 |
| ENDOD1   | -1,01103 | 0,00014  |
| DAGLB    | -1,01269 | 4,83E-06 |
| HMGXB4   | -1,01382 | 6,08E-06 |
| SACS     | -1,016   | 5,69E-05 |
| TM9SF2   | -1,01746 | 0,000856 |
| ZNF503   | -1,01906 | 6,87E-07 |
| TRMT6    | -1,0194  | 2,01E-05 |
| SLC35A2  | -1,01976 | 0,000242 |
| C19orf47 | -1,02276 | 0,000166 |
| CCDC93   | -1,02418 | 0,000364 |
| NCAPH    | -1,02545 | 1,14E-07 |
| UBE2R2   | -1,02614 | 1,24E-07 |
| SDF4     | -1,0269  | 0,000641 |
| TBX3     | -1,02947 | 2,24E-06 |
| NOCT     | -1,02987 | 0,000774 |
| MFN1     | -1,0306  | 0,000283 |
| UBIAD1   | -1,0313  | 5,30E-05 |
| IGBP1    | -1,03247 | 0,000252 |
| PBX3     | -1,03258 | 0,000798 |
| ATP6V1E1 | -1,03318 | 5,79E-05 |
| SUPT5H   | -1,03378 | 3,18E-06 |
| KDEL2    | -1,03415 | 3,11E-05 |
| PDLIM1   | -1,03529 | 2,02E-07 |
| CYCS     | -1,03689 | 1,51E-07 |
| RHOB2    | -1,0373  | 5,51E-06 |
| NDUFA4   | -1,04062 | 0,000129 |
| RBM26    | -1,04245 | 1,29E-05 |
| SEC24A   | -1,04255 | 5,20E-05 |
| DFFA     | -1,04259 | 4,07E-07 |
| ATG5     | -1,04389 | 1,53E-05 |
| MZT1     | -1,04523 | 0,000211 |

|          |          |          |
|----------|----------|----------|
| MPLKIP   | -1,04655 | 0,000457 |
| C4orf46  | -1,04733 | 0,000866 |
| ORC1     | -1,04742 | 0,000103 |
| PDHX     | -1,05045 | 0,000126 |
| RBM42    | -1,05065 | 4,42E-07 |
| CCNC     | -1,05134 | 0,000618 |
| UHRF1    | -1,05169 | 0,000433 |
| CSTF2    | -1,05173 | 3,51E-07 |
| SLBP     | -1,05248 | 3,06E-06 |
| FBXL5    | -1,05359 | 0,000158 |
| LRRC42   | -1,05378 | 2,48E-06 |
| HSPG2    | -1,05384 | 0,000787 |
| ARHGAP11 | -1,0542  | 1,51E-05 |
| FAM122A  | -1,05526 | 0,000808 |
| SMIM12   | -1,05579 | 6,17E-06 |
| PLS3     | -1,05627 | 5,31E-06 |
| YIPF5    | -1,05711 | 1,91E-05 |
| NOP10    | -1,0582  | 1,42E-07 |
| AIG1     | -1,05897 | 5,79E-06 |
| SLC4A1AP | -1,06019 | 5,30E-06 |
| COPG1    | -1,0602  | 1,57E-06 |
| RPS6KC1  | -1,06148 | 8,23E-05 |
| TMEM41A  | -1,06162 | 2,97E-06 |
| PQLC1    | -1,06205 | 3,25E-05 |
| STK25    | -1,06391 | 8,09E-07 |
| ANKRD54  | -1,06414 | 0,000111 |
| QRICH1   | -1,06416 | 2,23E-07 |
| TEAD1    | -1,06496 | 4,15E-06 |
| RNF219   | -1,06561 | 0,000138 |
| RPAP1    | -1,0657  | 9,78E-07 |
| PSMD8    | -1,06606 | 3,51E-09 |
| RBMS1    | -1,06618 | 9,61E-05 |
| HSPA5    | -1,06743 | 4,77E-10 |
| TMEM70   | -1,0681  | 1,73E-05 |
| PPIL4    | -1,07098 | 6,19E-06 |
| NOSIP    | -1,07207 | 4,05E-08 |
| ITGB1BP1 | -1,07359 | 1,89E-05 |
| C9orf40  | -1,07372 | 0,000427 |
| ARHGAP17 | -1,07429 | 3,45E-07 |
| TOMM5    | -1,07467 | 6,42E-07 |
| IKBKG    | -1,07572 | 2,17E-05 |
| DCAF12   | -1,07603 | 1,51E-06 |
| EIF2B5   | -1,07693 | 8,46E-06 |
| RNF25    | -1,07757 | 2,94E-06 |
| HPS5     | -1,0786  | 0,000898 |
| FOXJ3    | -1,07927 | 4,63E-07 |
| ZNF292   | -1,08096 | 1,18E-05 |
| GNL3L    | -1,0814  | 1,47E-06 |
| RABL3    | -1,08142 | 0,000158 |
| POLR2C   | -1,08201 | 2,95E-08 |

|           |          |          |
|-----------|----------|----------|
| PFDN2     | -1,08323 | 1,84E-06 |
| RRM2      | -1,08474 | 3,03E-08 |
| YARS      | -1,08484 | 1,78E-05 |
| RAB34     | -1,08554 | 6,41E-05 |
| MGAT1     | -1,08666 | 4,07E-05 |
| PHF19     | -1,08731 | 2,36E-06 |
| ZCCHC17   | -1,08863 | 5,05E-05 |
| NOC2L     | -1,0897  | 3,14E-06 |
| NCDN      | -1,0906  | 1,56E-07 |
| CHAF1A    | -1,09122 | 2,57E-06 |
| CSNK1A1   | -1,09142 | 2,21E-06 |
| KLHL18    | -1,09236 | 0,000191 |
| QKI       | -1,093   | 0,000952 |
| TANK      | -1,09409 | 9,17E-06 |
| SEC61A1   | -1,09457 | 0,00052  |
| TBPL1     | -1,09468 | 0,00032  |
| RLF       | -1,09598 | 3,83E-06 |
| WDR45B    | -1,09817 | 9,62E-05 |
| RAB2A     | -1,09985 | 1,84E-07 |
| CTPS1     | -1,10167 | 4,40E-07 |
| PJA2      | -1,10175 | 9,20E-06 |
| SNX4      | -1,10187 | 1,42E-06 |
| ITCH      | -1,10324 | 1,59E-08 |
| ST6GALNA4 | -1,10483 | 0,000733 |
| TBCCD1    | -1,10495 | 0,00037  |
| SHC1      | -1,10578 | 3,98E-09 |
| SMG5      | -1,10637 | 1,64E-09 |
| NFX1      | -1,10894 | 1,82E-08 |
| TMEM263   | -1,10991 | 4,10E-05 |
| LMNB2     | -1,11212 | 0,000168 |
| SEP15     | -1,11262 | 5,01E-08 |
| PIGK      | -1,11277 | 0,000473 |
| MFHAS1    | -1,1131  | 2,24E-06 |
| USP24     | -1,11512 | 1,87E-06 |
| CPTP      | -1,11526 | 1,53E-05 |
| VDAC3     | -1,11528 | 2,40E-06 |
| AP1S2     | -1,11566 | 0,000719 |
| USP11     | -1,11652 | 3,64E-07 |
| FUCA2     | -1,11678 | 0,000195 |
| ANAPC13   | -1,11688 | 0,000888 |
| AP2M1     | -1,1169  | 1,71E-05 |
| ACTG1     | -1,11743 | 0,000212 |
| SNX18     | -1,11881 | 0,000195 |
| MARK4     | -1,11934 | 0,000208 |
| SIK2      | -1,1211  | 0,000126 |
| DTYMK     | -1,12167 | 0,000165 |
| GNB1      | -1,12215 | 1,37E-10 |
| CTSC      | -1,12311 | 3,44E-07 |
| TAF2      | -1,12325 | 7,99E-08 |
| SUPT7L    | -1,12453 | 9,99E-07 |

|          |          |          |
|----------|----------|----------|
| PDIA3    | -1,12505 | 1,16E-06 |
| APOOL    | -1,12528 | 1,05E-05 |
| PSMD1    | -1,12578 | 1,37E-07 |
| OGFOD3   | -1,12834 | 1,82E-06 |
| RPN1     | -1,12839 | 1,03E-06 |
| TRIP12   | -1,12938 | 0,000374 |
| BLMH     | -1,12952 | 3,82E-07 |
| WDR62    | -1,13066 | 2,09E-05 |
| DYNC2H1  | -1,13083 | 0,000428 |
| CCT8     | -1,13191 | 7,84E-11 |
| SUGT1    | -1,13388 | 6,93E-05 |
| USP13    | -1,13405 | 2,75E-07 |
| VCP      | -1,13745 | 4,90E-05 |
| WBP11    | -1,13788 | 1,74E-08 |
| MTFR1L   | -1,13791 | 1,24E-05 |
| SP140L   | -1,13797 | 2,96E-05 |
| ACADM    | -1,13833 | 9,94E-06 |
| SAMD8    | -1,13841 | 5,16E-05 |
| TNKS     | -1,13905 | 8,88E-07 |
| COPS2    | -1,1394  | 1,33E-06 |
| ELOVL1   | -1,13962 | 5,04E-05 |
| GNL1     | -1,14003 | 1,47E-08 |
| FAM72B   | -1,14216 | 0,000616 |
| FAM57A   | -1,14237 | 0,00037  |
| UTP18    | -1,14308 | 9,85E-08 |
| EPS15L1  | -1,14354 | 3,04E-06 |
| ATP13A3  | -1,14397 | 5,05E-10 |
| COQ10B   | -1,14496 | 0,000293 |
| ELK1     | -1,14535 | 6,51E-06 |
| TNPO1    | -1,14551 | 1,16E-08 |
| TRAPPC3  | -1,14608 | 2,34E-06 |
| MAK16    | -1,14629 | 0,000288 |
| AGFG1    | -1,14698 | 2,14E-06 |
| MED15    | -1,14763 | 8,79E-08 |
| PSMA2    | -1,14776 | 9,83E-10 |
| FLNA     | -1,14867 | 4,07E-09 |
| ACTR3    | -1,14906 | 6,55E-06 |
| SNX3     | -1,14914 | 1,07E-05 |
| RNF126   | -1,1493  | 5,51E-05 |
| CCNE2    | -1,14951 | 3,83E-05 |
| RAB23    | -1,14961 | 1,57E-05 |
| FN3KRP   | -1,14999 | 2,95E-07 |
| SAMD4B   | -1,15133 | 3,16E-05 |
| MINOS1   | -1,15167 | 0,000356 |
| SERPINH1 | -1,15196 | 4,25E-08 |
| SERINC1  | -1,1527  | 5,73E-05 |
| NDUFAF3  | -1,15443 | 5,28E-08 |
| SLC33A1  | -1,15449 | 1,69E-06 |
| WWTR1    | -1,15576 | 4,41E-08 |
| FBXO30   | -1,15642 | 0,00022  |

|         |          |          |
|---------|----------|----------|
| RBM18   | -1,15691 | 3,78E-06 |
| LTV1    | -1,15736 | 0,000659 |
| TMEM259 | -1,15745 | 3,69E-08 |
| ZBTB43  | -1,15844 | 3,38E-06 |
| DNAJC13 | -1,15895 | 1,40E-05 |
| GRAMD1A | -1,15995 | 8,25E-09 |
| EIF2A   | -1,16064 | 2,11E-06 |
| LASP1   | -1,16255 | 4,12E-05 |
| UBE2W   | -1,16442 | 3,84E-06 |
| PLCB4   | -1,16535 | 0,000122 |
| CIC     | -1,16554 | 3,76E-09 |
| PPP1R8  | -1,16558 | 9,62E-09 |
| USP33   | -1,16588 | 6,84E-06 |
| PKNOX1  | -1,16593 | 7,54E-06 |
| SURF4   | -1,16604 | 1,77E-06 |
| PWP2    | -1,16643 | 1,53E-06 |
| SIN3B   | -1,16666 | 1,78E-07 |
| CDK17   | -1,16698 | 0,000606 |
| MFAP1   | -1,16803 | 4,92E-05 |
| HPS3    | -1,16814 | 1,27E-06 |
| ACTB    | -1,16818 | 2,15E-05 |
| TFDP2   | -1,1682  | 3,69E-07 |
| DPP9    | -1,16832 | 7,19E-07 |
| RND3    | -1,16854 | 5,07E-05 |
| FKBP15  | -1,16907 | 1,00E-07 |
| SUN1    | -1,16916 | 1,54E-09 |
| DHDDS   | -1,16959 | 0,001001 |
| PDLIM7  | -1,17054 | 2,21E-06 |
| DNAJC8  | -1,17099 | 1,92E-08 |
| EIF3D   | -1,17107 | 4,61E-08 |
| DCTN6   | -1,17372 | 1,79E-06 |
| PRPS2   | -1,175   | 3,48E-05 |
| ALYREF  | -1,17543 | 2,00E-10 |
| LPP     | -1,17649 | 2,62E-06 |
| DNAJC16 | -1,17748 | 5,05E-05 |
| AKIRIN2 | -1,17816 | 1,53E-05 |
| DMWD    | -1,17897 | 3,41E-06 |
| HIAT1   | -1,17902 | 1,91E-07 |
| MTMR2   | -1,17967 | 9,04E-06 |
| NUS1    | -1,18289 | 7,28E-07 |
| CAPZB   | -1,18308 | 2,47E-05 |
| HK2     | -1,18332 | 0,000791 |
| PHF20L1 | -1,18359 | 1,54E-09 |
| TSR2    | -1,18399 | 1,52E-08 |
| SHB     | -1,18514 | 4,79E-10 |
| TMCO1   | -1,1852  | 6,22E-05 |
| MRPL47  | -1,18521 | 3,19E-07 |
| MYDGF   | -1,18609 | 2,28E-06 |
| PTAR1   | -1,18682 | 0,000115 |
| FOXK1   | -1,18757 | 1,84E-07 |

|          |          |          |
|----------|----------|----------|
| INTS9    | -1,18982 | 2,17E-06 |
| STARD3   | -1,19084 | 0,000383 |
| ARID4B   | -1,191   | 8,77E-05 |
| SERTAD2  | -1,19116 | 6,55E-08 |
| DIEXF    | -1,19186 | 0,000417 |
| HEATR1   | -1,19255 | 5,59E-07 |
| PAK1IP1  | -1,19274 | 2,36E-06 |
| DIS3     | -1,19443 | 2,01E-06 |
| ORMDL3   | -1,1992  | 0,000119 |
| NCAPD3   | -1,1998  | 1,08E-06 |
| STK24    | -1,20144 | 1,69E-09 |
| PHACTR4  | -1,20166 | 4,73E-10 |
| TM2D2    | -1,20218 | 6,13E-07 |
| NONO     | -1,20239 | 1,05E-08 |
| ACOT7    | -1,20251 | 5,83E-06 |
| LDHA     | -1,20275 | 3,12E-09 |
| GPKOW    | -1,20348 | 0,000113 |
| YAP1     | -1,20363 | 1,71E-06 |
| MAP3K3   | -1,20371 | 0,00013  |
| MAD2L2   | -1,20388 | 0,000189 |
| EXT2     | -1,20461 | 6,81E-05 |
| SIPA1L3  | -1,20534 | 1,05E-09 |
| RWDD1    | -1,20627 | 8,97E-07 |
| TRAF3IP1 | -1,2079  | 2,69E-07 |
| BAP1     | -1,20854 | 1,58E-10 |
| ZMYM6    | -1,20935 | 0,000239 |
| ATG3     | -1,20979 | 6,25E-09 |
| HAT1     | -1,21002 | 6,65E-10 |
| UBAC2    | -1,21015 | 2,62E-07 |
| CC2D1B   | -1,21037 | 1,49E-06 |
| EXO5     | -1,2105  | 0,000232 |
| RNF220   | -1,21182 | 8,51E-10 |
| USP4     | -1,21223 | 2,34E-05 |
| CHCHD2   | -1,21247 | 7,67E-13 |
| CASP7    | -1,21359 | 0,000282 |
| KANK2    | -1,21436 | 1,13E-07 |
| CCZ1     | -1,21447 | 1,67E-06 |
| KIF18A   | -1,21457 | 5,14E-05 |
| FAN1     | -1,21493 | 0,000681 |
| KAT6A    | -1,2163  | 3,36E-06 |
| PI4K2A   | -1,21776 | 5,41E-05 |
| DDX10    | -1,21864 | 3,58E-09 |
| CAP2     | -1,21885 | 1,67E-07 |
| ALG3     | -1,21938 | 6,33E-05 |
| PHC2     | -1,21963 | 2,45E-06 |
| LAPTM4A  | -1,21971 | 9,41E-10 |
| TMEM51   | -1,22021 | 1,61E-05 |
| OXCT1    | -1,22379 | 1,54E-06 |
| ERCC2    | -1,22602 | 1,39E-05 |
| DAB2IP   | -1,22622 | 7,53E-09 |



|          |          |          |
|----------|----------|----------|
| NF2      | -1,2273  | 4,95E-07 |
| MKL1     | -1,22793 | 8,68E-09 |
| INTS10   | -1,22845 | 7,64E-07 |
| UTP6     | -1,23103 | 7,77E-09 |
| CDV3     | -1,23114 | 4,75E-07 |
| CEP152   | -1,23137 | 0,000846 |
| MORC3    | -1,23166 | 0,000254 |
| SLC36A1  | -1,23174 | 1,43E-05 |
| STX2     | -1,23341 | 9,26E-05 |
| PLEKHG2  | -1,23363 | 3,64E-07 |
| DDX56    | -1,23425 | 4,24E-10 |
| ARHGEF7  | -1,23453 | 2,20E-06 |
| EXOSC3   | -1,23534 | 1,34E-06 |
| RAB7A    | -1,23805 | 0,000109 |
| PITPNB   | -1,23836 | 4,31E-11 |
| GLMN     | -1,23956 | 0,000456 |
| NEK7     | -1,23987 | 3,22E-06 |
| ZFAND5   | -1,23988 | 2,58E-09 |
| ARIH2    | -1,24053 | 3,20E-09 |
| SLC25A46 | -1,24054 | 2,84E-06 |
| BCL3     | -1,24109 | 0,000127 |
| BNIP2    | -1,24138 | 1,27E-05 |
| ITGB1    | -1,24327 | 2,95E-07 |
| TRMU     | -1,24362 | 1,61E-05 |
| ASCC3    | -1,245   | 0,000332 |
| ISY1     | -1,24576 | 2,15E-05 |
| TMEM38B  | -1,24587 | 2,97E-05 |
| TMEM248  | -1,24626 | 2,09E-09 |
| THAP4    | -1,24628 | 5,04E-09 |
| HK1      | -1,24733 | 1,59E-05 |
| ACTN4    | -1,24734 | 1,69E-06 |
| GNL3     | -1,24803 | 3,38E-05 |
| CSPP1    | -1,24943 | 0,000265 |
| KDM5C    | -1,24961 | 1,41E-10 |
| HDHD1    | -1,24966 | 0,000861 |
| TSC22D2  | -1,24967 | 1,77E-06 |
| RIC8A    | -1,2503  | 8,96E-12 |
| PHIP     | -1,25177 | 1,18E-07 |
| DEDD2    | -1,25336 | 6,67E-05 |
| BAG4     | -1,25368 | 2,44E-05 |
| GPATCH3  | -1,25513 | 0,000306 |
| UBE3A    | -1,25593 | 2,90E-10 |
| FAM49B   | -1,25639 | 7,87E-10 |
| RUNX2    | -1,25768 | 1,24E-07 |
| AP2A2    | -1,25933 | 5,61E-09 |
| CCDC14   | -1,26133 | 0,000394 |
| GAS6     | -1,26183 | 0,000236 |
| PRPF38A  | -1,26198 | 4,77E-11 |
| FLVCR1   | -1,26275 | 0,000314 |
| APTX     | -1,2634  | 1,66E-06 |

|          |          |          |
|----------|----------|----------|
| CD99L2   | -1,26348 | 2,69E-05 |
| MAP3K7   | -1,26619 | 1,65E-08 |
| CDK11B   | -1,26704 | 5,73E-07 |
| DNTTIP2  | -1,26956 | 2,32E-10 |
| TRIO     | -1,26972 | 5,75E-09 |
| TMEM138  | -1,27089 | 3,70E-08 |
| SNTA1    | -1,27301 | 2,83E-05 |
| SOCS6    | -1,27322 | 1,47E-05 |
| LMNA     | -1,27329 | 0,000111 |
| UHRF2    | -1,27432 | 0,000554 |
| SSFA2    | -1,27579 | 1,06E-09 |
| CDC37L1  | -1,27586 | 2,45E-05 |
| HAUS6    | -1,27693 | 6,29E-07 |
| TJAP1    | -1,27853 | 0,000374 |
| CHAF1B   | -1,27919 | 6,06E-07 |
| DHX16    | -1,27963 | 1,38E-10 |
| HDAC1    | -1,27982 | 7,56E-11 |
| PPP5C    | -1,28107 | 7,88E-09 |
| MMS22L   | -1,28294 | 9,95E-06 |
| RAP1A    | -1,28354 | 1,24E-07 |
| RLIM     | -1,2846  | 9,00E-11 |
| APEX2    | -1,28534 | 8,76E-09 |
| NIPA2    | -1,28553 | 5,53E-07 |
| MALSU1   | -1,28634 | 3,66E-05 |
| PNP      | -1,28673 | 8,14E-10 |
| ERCC6L   | -1,28677 | 2,49E-07 |
| TTK      | -1,28776 | 1,73E-07 |
| EFCAB2   | -1,28799 | 0,000981 |
| TOM1L2   | -1,28894 | 0,000159 |
| TFB2M    | -1,28937 | 5,43E-05 |
| BNIP3L   | -1,29027 | 0,000905 |
| HSPA13   | -1,29032 | 5,39E-05 |
| EPHX1    | -1,29052 | 0,000121 |
| MTO1     | -1,29108 | 9,78E-07 |
| AIDA     | -1,29139 | 4,37E-05 |
| EBNA1BP2 | -1,29221 | 1,74E-13 |
| ZRANB2   | -1,29222 | 1,30E-10 |
| NOL4L    | -1,29247 | 1,82E-07 |
| HIATL1   | -1,29289 | 9,22E-09 |
| MORF4L2  | -1,29364 | 3,65E-12 |
| PHF8     | -1,29467 | 1,31E-07 |
| BAHD1    | -1,29476 | 4,83E-07 |
| C20orf24 | -1,29507 | 5,41E-08 |
| SLC9A1   | -1,29678 | 6,34E-11 |
| KIAA2013 | -1,29687 | 7,60E-09 |
| HSD17B12 | -1,29695 | 2,00E-09 |
| SATB2    | -1,29869 | 1,64E-06 |
| DNAJB2   | -1,30179 | 8,06E-09 |
| CEP89    | -1,30194 | 3,18E-06 |
| ACVR1    | -1,30251 | 4,75E-05 |

|          |          |          |
|----------|----------|----------|
| SKI      | -1,30274 | 7,45E-10 |
| KIAA0020 | -1,30412 | 2,44E-05 |
| RABGEF1  | -1,30647 | 3,62E-08 |
| SBNO2    | -1,30716 | 7,70E-08 |
| SDHB     | -1,30754 | 3,67E-09 |
| MRPL32   | -1,30952 | 6,52E-08 |
| CASP8AP2 | -1,31071 | 2,55E-06 |
| IPO5     | -1,31086 | 1,44E-13 |
| MLPH     | -1,31291 | 3,65E-09 |
| CADM1    | -1,3159  | 2,30E-08 |
| C1orf112 | -1,31649 | 1,34E-06 |
| SLC25A22 | -1,31657 | 2,88E-07 |
| ARHGEF18 | -1,31711 | 1,16E-08 |
| IKBKB    | -1,3173  | 0,00021  |
| UBA2     | -1,3185  | 3,14E-08 |
| CASC4    | -1,31904 | 8,33E-09 |
| ZNF234   | -1,31939 | 0,000678 |
| UBE2V2   | -1,31969 | 3,64E-06 |
| PFKP     | -1,31995 | 5,68E-07 |
| ITGAV    | -1,31998 | 5,08E-06 |
| MYCBP2   | -1,32113 | 1,35E-08 |
| MIER2    | -1,32149 | 4,42E-06 |
| MRTO4    | -1,32229 | 1,11E-12 |
| DONSON   | -1,3236  | 2,75E-06 |
| CWC25    | -1,32391 | 5,83E-07 |
| TOPBP1   | -1,32422 | 2,11E-11 |
| EIF4A2   | -1,32554 | 0,00036  |
| ZNF275   | -1,32629 | 2,15E-07 |
| ANKLE2   | -1,32729 | 5,68E-10 |
| DOCK7    | -1,32859 | 4,57E-09 |
| ACBD3    | -1,3292  | 5,44E-09 |
| AHCTF1   | -1,32964 | 5,86E-06 |
| ARFGAP1  | -1,32968 | 5,96E-08 |
| TIMM17A  | -1,33171 | 1,12E-07 |
| ACTN1    | -1,33179 | 6,04E-07 |
| PLEKHM2  | -1,33206 | 3,00E-12 |
| OSBPL2   | -1,33333 | 5,93E-09 |
| MSANTD3  | -1,33432 | 2,14E-06 |
| WASF2    | -1,33434 | 2,35E-13 |
| ERI1     | -1,33456 | 2,89E-08 |
| GPATCH1  | -1,3349  | 3,75E-07 |
| CDC42    | -1,33807 | 9,64E-10 |
| KPNA1    | -1,33844 | 2,83E-08 |
| TXN      | -1,33867 | 1,10E-05 |
| RAPH1    | -1,3404  | 1,07E-05 |
| MFN2     | -1,34078 | 9,17E-13 |
| S1PR2    | -1,34189 | 0,000608 |
| RAI14    | -1,34441 | 1,72E-06 |
| NASP     | -1,34585 | 1,06E-14 |
| MRPS22   | -1,34614 | 4,18E-09 |

|          |          |          |
|----------|----------|----------|
| ADAM17   | -1,34641 | 7,53E-10 |
| CBFB     | -1,34671 | 1,30E-10 |
| REXO1    | -1,34673 | 5,25E-12 |
| C1orf216 | -1,34687 | 6,66E-06 |
| SLC23A2  | -1,34752 | 2,50E-08 |
| CCDC58   | -1,3476  | 6,44E-08 |
| PJA1     | -1,34809 | 0,000137 |
| CAPZA1   | -1,35026 | 2,71E-11 |
| ATP1B3   | -1,35056 | 1,67E-14 |
| CITED2   | -1,35122 | 4,06E-05 |
| COPA     | -1,35123 | 1,61E-10 |
| TMEM87A  | -1,3538  | 4,32E-11 |
| QSOX2    | -1,35435 | 1,64E-05 |
| RNF216P1 | -1,35441 | 1,50E-06 |
| DNAJC11  | -1,35479 | 9,87E-13 |
| PLP2     | -1,35551 | 8,62E-11 |
| NCLN     | -1,35679 | 1,07E-12 |
| MIER1    | -1,35682 | 3,88E-08 |
| IRS1     | -1,35682 | 4,18E-10 |
| SYMPK    | -1,35902 | 6,83E-14 |
| SPG20    | -1,35911 | 3,67E-07 |
| DENND5A  | -1,36    | 3,60E-05 |
| LEPROTL1 | -1,36011 | 6,11E-06 |
| KIFAP3   | -1,36115 | 4,42E-06 |
| TOE1     | -1,36168 | 0,000107 |
| UBAP1    | -1,3647  | 2,05E-08 |
| SLC9A6   | -1,36507 | 0,000666 |
| ANXA5    | -1,3651  | 3,23E-13 |
| KIAA1524 | -1,36548 | 8,31E-09 |
| DBNL     | -1,36569 | 1,18E-05 |
| MDC1     | -1,36569 | 7,12E-12 |
| ZNF512   | -1,36656 | 9,34E-07 |
| MPZL1    | -1,36674 | 5,95E-14 |
| SSH1     | -1,36882 | 5,71E-10 |
| SEMA7A   | -1,36952 | 3,64E-06 |
| TMEM30A  | -1,37189 | 2,64E-05 |
| SUV39H1  | -1,37189 | 2,50E-09 |
| FAXC     | -1,37341 | 0,000224 |
| NECAP2   | -1,3786  | 1,42E-09 |
| B3GALT6  | -1,37888 | 3,10E-08 |
| BLOC1S6  | -1,37899 | 3,55E-09 |
| EXOSC10  | -1,3805  | 1,70E-10 |
| KLHL2    | -1,38056 | 0,000162 |
| MYADM    | -1,38064 | 0,000163 |
| CDC42BPA | -1,38072 | 1,56E-06 |
| BRF2     | -1,38112 | 2,78E-07 |
| ATG4B    | -1,38119 | 5,75E-09 |
| GNAI2    | -1,3819  | 7,96E-06 |
| DEPDC1   | -1,38202 | 3,17E-07 |
| UBXN8    | -1,38215 | 2,77E-05 |

|          |          |          |
|----------|----------|----------|
| LSM1     | -1,38247 | 1,14E-06 |
| SLC25A32 | -1,38276 | 1,03E-06 |
| KIF4A    | -1,38299 | 2,41E-12 |
| PBDC1    | -1,38403 | 8,03E-09 |
| AP1M1    | -1,38649 | 1,75E-06 |
| RNF170   | -1,38668 | 0,000407 |
| SRPRB    | -1,38679 | 1,17E-13 |
| EXO1     | -1,39012 | 1,22E-09 |
| SHQ1     | -1,3902  | 7,46E-07 |
| TMEM39B  | -1,39049 | 6,49E-06 |
| TCEB1    | -1,39146 | 1,99E-12 |
| ATG9A    | -1,3939  | 2,45E-06 |
| MTF2     | -1,39456 | 2,86E-06 |
| HDAC7    | -1,39477 | 2,84E-10 |
| PDGFA    | -1,39504 | 1,64E-07 |
| SAT2     | -1,39533 | 1,73E-06 |
| GFM1     | -1,39662 | 4,68E-12 |
| GTF2B    | -1,39691 | 6,76E-07 |
| GADD45A  | -1,39712 | 4,78E-07 |
| HBS1L    | -1,39903 | 2,40E-12 |
| MRPL37   | -1,39999 | 6,24E-08 |
| REXO2    | -1,40182 | 2,32E-05 |
| CLSTN1   | -1,40335 | 1,24E-09 |
| VPS37B   | -1,40349 | 6,05E-10 |
| WDR47    | -1,40531 | 8,56E-06 |
| NUDT16   | -1,40718 | 2,16E-06 |
| ASB6     | -1,40814 | 2,56E-09 |
| C16orf70 | -1,40932 | 1,62E-05 |
| GPN2     | -1,40943 | 6,40E-10 |
| TMED5    | -1,41061 | 5,64E-08 |
| TRAM1    | -1,41109 | 1,49E-05 |
| PPARA    | -1,41138 | 0,000167 |
| SLC39A13 | -1,41525 | 7,58E-07 |
| LYRM2    | -1,41763 | 1,13E-10 |
| LDAH     | -1,41795 | 5,91E-08 |
| BUB1B    | -1,41888 | 1,14E-05 |
| ERICH1   | -1,41905 | 3,62E-07 |
| TMEM59   | -1,42199 | 2,17E-06 |
| KPNA6    | -1,42441 | 1,62E-11 |
| EIF3J    | -1,42458 | 4,53E-12 |
| MGAT5    | -1,42518 | 3,74E-09 |
| ARFGEF1  | -1,42601 | 3,35E-10 |
| VAMP3    | -1,42728 | 5,10E-05 |
| IPO9     | -1,42782 | 5,34E-10 |
| EMC1     | -1,42848 | 6,08E-09 |
| PLK2     | -1,42879 | 0,000171 |
| TMCO3    | -1,42973 | 6,13E-06 |
| TOMM40L  | -1,43021 | 2,59E-06 |
| TAF5L    | -1,43094 | 3,83E-10 |
| EFNB1    | -1,4315  | 5,97E-06 |

|           |          |          |
|-----------|----------|----------|
| SLC16A9   | -1,43409 | 0,000238 |
| ITGA6     | -1,43492 | 2,18E-05 |
| ASAP1     | -1,43549 | 2,82E-12 |
| BBX       | -1,43564 | 1,52E-07 |
| COPB2     | -1,43657 | 2,40E-07 |
| GTF2A2    | -1,43695 | 1,85E-12 |
| KIF2C     | -1,43896 | 2,35E-09 |
| TBC1D23   | -1,43906 | 5,01E-07 |
| CCM2      | -1,43965 | 4,71E-09 |
| YEATS2    | -1,44017 | 0,000258 |
| CEP85     | -1,44164 | 0,000277 |
| SYTL2     | -1,44175 | 3,36E-08 |
| MICA      | -1,44469 | 2,11E-06 |
| BCL2L2    | -1,44516 | 8,14E-07 |
| SKIL      | -1,44596 | 9,05E-08 |
| SH3BP5L   | -1,44618 | 5,15E-11 |
| XPNPEP1   | -1,44878 | 2,14E-07 |
| RAD54L    | -1,4493  | 1,81E-06 |
| SLC20A2   | -1,44963 | 3,61E-11 |
| PTS       | -1,45005 | 1,78E-05 |
| CREB3     | -1,45106 | 1,59E-05 |
| PLEC      | -1,45246 | 0,000705 |
| LYPD1     | -1,45284 | 0,000585 |
| FAM65A    | -1,45425 | 1,37E-11 |
| NME7      | -1,45457 | 6,08E-05 |
| IMPAD1    | -1,4554  | 5,85E-12 |
| LOC101925 | -1,45668 | 0,001006 |
| ARID1B    | -1,45985 | 4,37E-10 |
| TBC1D2B   | -1,46214 | 1,71E-09 |
| ABCD3     | -1,46272 | 1,72E-10 |
| RRAS2     | -1,463   | 9,28E-06 |
| TBL1XR1   | -1,46496 | 1,43E-08 |
| INPP5B    | -1,46567 | 0,000281 |
| UBR1      | -1,4663  | 0,000226 |
| ZNF283    | -1,46686 | 0,00023  |
| CENPW     | -1,46731 | 3,46E-07 |
| MYEOV2    | -1,4674  | 3,46E-10 |
| NCS1      | -1,47111 | 4,94E-15 |
| LBR       | -1,47159 | 5,90E-10 |
| SH3GL1    | -1,47415 | 2,24E-10 |
| SQSTM1    | -1,47442 | 3,37E-05 |
| STK4      | -1,47469 | 4,21E-13 |
| DMAP1     | -1,47569 | 2,27E-05 |
| ABCC4     | -1,47579 | 6,84E-10 |
| LPIN1     | -1,47806 | 0,000786 |
| MELK      | -1,47905 | 2,87E-14 |
| LANCL2    | -1,48078 | 5,19E-12 |
| STOM      | -1,48092 | 1,02E-10 |
| PLEKHA3   | -1,48144 | 3,44E-05 |
| PIP4K2A   | -1,48369 | 2,02E-07 |

|           |          |          |
|-----------|----------|----------|
| NFAT5     | -1,48375 | 7,60E-06 |
| SSH2      | -1,48499 | 6,32E-07 |
| FAM76A    | -1,48512 | 0,00099  |
| TBC1D25   | -1,4853  | 0,000695 |
| ADAM10    | -1,48561 | 2,37E-12 |
| SMU1      | -1,48745 | 1,03E-13 |
| LRRC47    | -1,48757 | 1,14E-08 |
| TMEM50A   | -1,48827 | 2,51E-11 |
| MPRIIP    | -1,48976 | 1,75E-11 |
| MAGOH     | -1,49095 | 2,15E-13 |
| ZYX       | -1,49219 | 4,66E-10 |
| EDEM1     | -1,49367 | 4,61E-10 |
| ICMT      | -1,4939  | 2,56E-15 |
| MANEA     | -1,49439 | 0,000116 |
| SGCB      | -1,4946  | 5,31E-09 |
| NSMAF     | -1,49464 | 7,52E-11 |
| GIN3      | -1,49571 | 5,21E-05 |
| YIPF6     | -1,49733 | 4,64E-12 |
| LMF2      | -1,49757 | 3,72E-08 |
| FUCA1     | -1,49945 | 1,46E-05 |
| DOCK1     | -1,50068 | 1,78E-08 |
| GNL2      | -1,50073 | 2,93E-13 |
| MAD1L1    | -1,50181 | 1,50E-16 |
| GBF1      | -1,50184 | 2,66E-06 |
| HIC2      | -1,50227 | 0,000448 |
| NUP43     | -1,50395 | 2,18E-08 |
| PFN2      | -1,50431 | 6,19E-17 |
| PSMB2     | -1,50445 | 8,06E-18 |
| FOXC1     | -1,50514 | 4,85E-08 |
| SDCCAG8   | -1,50522 | 4,58E-06 |
| ANXA6     | -1,50905 | 2,06E-05 |
| B4GALT4   | -1,51037 | 7,35E-10 |
| GOPC      | -1,5121  | 4,67E-12 |
| YRDC      | -1,51281 | 1,32E-08 |
| DDAH1     | -1,51299 | 0,000142 |
| TOX2      | -1,51305 | 3,76E-06 |
| KRBOX4    | -1,51313 | 0,00013  |
| DNAJB11   | -1,51375 | 6,31E-15 |
| SNAP23    | -1,51515 | 2,54E-07 |
| SOWAHC    | -1,5159  | 0,000547 |
| UTP11L    | -1,5161  | 3,38E-11 |
| ATP11B    | -1,51839 | 8,76E-13 |
| PGS1      | -1,51861 | 5,87E-07 |
| GBE1      | -1,52097 | 4,56E-07 |
| KLHL5     | -1,52215 | 8,66E-09 |
| MIR4435-2 | -1,52279 | 1,73E-06 |
| ENO1      | -1,52358 | 4,81E-09 |
| PPP1R9B   | -1,52436 | 4,57E-17 |
| ERC2      | -1,52481 | 4,20E-05 |
| MIA3      | -1,52495 | 6,42E-13 |

|           |          |          |
|-----------|----------|----------|
| HOXB7     | -1,52597 | 5,71E-07 |
| NOTCH2    | -1,52611 | 6,13E-16 |
| FNIP1     | -1,52842 | 7,92E-12 |
| IP6K1     | -1,52852 | 3,63E-14 |
| TNFRSF12A | -1,52883 | 0,000234 |
| ETV6      | -1,52945 | 4,65E-09 |
| CDC20     | -1,531   | 9,77E-20 |
| PCBP4     | -1,53179 | 3,14E-09 |
| PRDM2     | -1,53193 | 1,62E-09 |
| MIB2      | -1,53235 | 4,06E-06 |
| BACH1     | -1,53334 | 3,42E-06 |
| YAE1D1    | -1,53372 | 3,22E-05 |
| ARID5A    | -1,53516 | 8,13E-06 |
| TRIM5     | -1,53539 | 0,000679 |
| FAM129B   | -1,53697 | 8,17E-13 |
| OSBPL5    | -1,53793 | 2,62E-06 |
| EIF5A2    | -1,53822 | 5,25E-08 |
| NOD1      | -1,53834 | 8,73E-06 |
| LRRC40    | -1,53938 | 1,90E-06 |
| TNK2      | -1,54003 | 9,60E-05 |
| TMEM181   | -1,54368 | 4,04E-11 |
| PPP2R2A   | -1,54451 | 8,37E-15 |
| SGK223    | -1,54663 | 2,15E-08 |
| ALG14     | -1,54874 | 0,000163 |
| ARRDC1-AS | -1,55022 | 3,84E-05 |
| LUZP1     | -1,55186 | 1,50E-05 |
| MAGT1     | -1,55232 | 2,12E-14 |
| TOLLIP    | -1,5527  | 2,21E-05 |
| WDR76     | -1,55352 | 3,61E-07 |
| ARMCX3    | -1,55462 | 3,33E-08 |
| UBQLN2    | -1,55565 | 3,04E-13 |
| NSRP1     | -1,55566 | 3,02E-11 |
| ATP6V0B   | -1,55663 | 1,92E-17 |
| HDLBP     | -1,55682 | 1,28E-09 |
| PLEKHA5   | -1,55723 | 7,78E-09 |
| VASP      | -1,55866 | 4,49E-16 |
| COPS7B    | -1,55913 | 7,70E-09 |
| ZAK       | -1,56111 | 4,48E-11 |
| LATS2     | -1,56116 | 1,99E-07 |
| ANTXR1    | -1,56135 | 7,16E-17 |
| CCDC137   | -1,56189 | 4,21E-08 |
| SEC23A    | -1,56434 | 2,38E-08 |
| RASA2     | -1,56471 | 0,000108 |
| RER1      | -1,56473 | 2,05E-15 |
| EIF2B3    | -1,5651  | 3,14E-06 |
| HMGXB3    | -1,56519 | 2,55E-18 |
| ESCO2     | -1,56637 | 3,73E-09 |
| SNRNP40   | -1,56677 | 2,22E-12 |
| AMPD2     | -1,56766 | 1,00E-08 |
| CXXC5     | -1,56829 | 4,04E-06 |



|           |          |          |
|-----------|----------|----------|
| MPDZ      | -1,56829 | 1,67E-06 |
| DIAPH3    | -1,56902 | 3,88E-05 |
| UCHL3     | -1,56944 | 1,03E-06 |
| LY6G5B    | -1,57088 | 0,000473 |
| IL10RB    | -1,57192 | 8,46E-05 |
| GTF2E2    | -1,57196 | 1,20E-15 |
| FAM73A    | -1,57334 | 1,63E-05 |
| CLN8      | -1,57472 | 2,99E-10 |
| SEPT2     | -1,57639 | 1,10E-17 |
| TPM4      | -1,57893 | 3,67E-18 |
| NEDD4L    | -1,57898 | 1,72E-07 |
| SEPN1     | -1,57914 | 8,03E-17 |
| RBFOX2    | -1,58351 | 1,61E-16 |
| LAS1L     | -1,58552 | 2,78E-11 |
| STXBP1    | -1,5862  | 3,53E-09 |
| GIN5      | -1,58802 | 4,54E-12 |
| HUS1      | -1,58824 | 2,54E-07 |
| BAG3      | -1,58983 | 3,35E-06 |
| NMNAT1    | -1,59025 | 7,42E-06 |
| ZBTB17    | -1,59055 | 1,45E-11 |
| TLN1      | -1,59092 | 1,23E-13 |
| TRIT1     | -1,59328 | 1,49E-08 |
| GNG5      | -1,59489 | 2,83E-14 |
| SPAG9     | -1,59637 | 1,85E-10 |
| BICD2     | -1,59927 | 3,97E-12 |
| STXBP5    | -1,59963 | 1,31E-06 |
| SNTB2     | -1,60156 | 1,46E-09 |
| HSPA12A   | -1,60347 | 0,000134 |
| POLQ      | -1,60505 | 9,90E-07 |
| TBC1D4    | -1,6056  | 0,000339 |
| MSX1      | -1,60706 | 2,57E-06 |
| PGK1      | -1,60835 | 4,55E-17 |
| QSOX1     | -1,60867 | 3,15E-11 |
| ITPR1PL2  | -1,60979 | 4,75E-11 |
| POLR3D    | -1,61001 | 1,66E-08 |
| KCTD9     | -1,61038 | 1,09E-10 |
| PRKACB    | -1,61322 | 3,46E-07 |
| PDLIM2    | -1,61362 | 7,28E-06 |
| CHSY1     | -1,61568 | 1,48E-09 |
| TMEM39A   | -1,61625 | 2,63E-07 |
| SHCBP1    | -1,62311 | 4,81E-14 |
| PTPN21    | -1,62843 | 5,04E-09 |
| LOXL1-AS1 | -1,63063 | 0,000836 |
| MTERF4    | -1,63134 | 7,12E-10 |
| HIPK2     | -1,63266 | 1,11E-05 |
| LEPROT    | -1,63321 | 7,43E-12 |
| ATP6V1H   | -1,63507 | 7,48E-12 |
| DNAJC24   | -1,63791 | 2,73E-05 |
| CLDND1    | -1,63873 | 4,11E-10 |
| NR2F1     | -1,63897 | 2,38E-05 |

|           |          |          |
|-----------|----------|----------|
| MLF1      | -1,64047 | 3,45E-08 |
| CD58      | -1,64159 | 9,22E-07 |
| HCFC2     | -1,6421  | 0,000459 |
| GCLM      | -1,64211 | 3,50E-05 |
| OTUD3     | -1,64247 | 2,98E-07 |
| PAM       | -1,64407 | 2,17E-08 |
| MBTPS2    | -1,64644 | 1,86E-11 |
| STAT3     | -1,64798 | 3,31E-06 |
| APOBEC3B  | -1,65166 | 2,20E-05 |
| FGFR2     | -1,65523 | 5,91E-06 |
| EMC7      | -1,6553  | 6,97E-10 |
| R3HCC1    | -1,65587 | 1,27E-09 |
| DR1       | -1,66195 | 2,78E-10 |
| HGSNAT    | -1,66215 | 3,50E-06 |
| TTC28     | -1,66249 | 7,65E-06 |
| TYRO3     | -1,66266 | 6,38E-17 |
| CHPF2     | -1,66283 | 1,35E-08 |
| CRISPLD2  | -1,66393 | 9,52E-09 |
| NUMBL     | -1,665   | 3,12E-13 |
| PLEKHM1   | -1,66988 | 1,18E-06 |
| ARF4      | -1,67302 | 1,56E-06 |
| YKT6      | -1,67334 | 2,42E-19 |
| CYB5R3    | -1,67336 | 1,72E-10 |
| LOC100506 | -1,67765 | 0,000381 |
| HIVEP2    | -1,67886 | 1,17E-08 |
| CMPK1     | -1,68012 | 6,69E-09 |
| RIC1      | -1,68051 | 6,00E-08 |
| JAG1      | -1,68239 | 1,43E-06 |
| DAPK3     | -1,6834  | 1,41E-16 |
| RAPGEF1   | -1,68387 | 2,04E-12 |
| CSNK1D    | -1,68634 | 7,42E-17 |
| SRSF4     | -1,68772 | 3,98E-14 |
| NABP1     | -1,68902 | 2,49E-08 |
| MYH9      | -1,68934 | 2,46E-12 |
| HTRA1     | -1,6905  | 8,08E-11 |
| NCEH1     | -1,69218 | 1,61E-06 |
| POMK      | -1,69266 | 0,000639 |
| PPARG     | -1,69331 | 0,000956 |
| DIXDC1    | -1,6934  | 1,44E-05 |
| TAF9B     | -1,69427 | 1,46E-06 |
| SLC16A1   | -1,69561 | 3,14E-16 |
| MCPH1     | -1,69637 | 8,30E-13 |
| PIBF1     | -1,69744 | 2,82E-05 |
| SVIL-AS1  | -1,69875 | 7,37E-11 |
| UBA3      | -1,69999 | 1,43E-13 |
| FAM135A   | -1,70097 | 0,000331 |
| ASB1      | -1,70169 | 3,56E-14 |
| AKIRIN1   | -1,70286 | 1,13E-15 |
| TRIM35    | -1,70307 | 1,09E-09 |
| POLR1E    | -1,70338 | 1,23E-13 |

|         |          |          |
|---------|----------|----------|
| LRIG1   | -1,70393 | 5,28E-10 |
| ELP3    | -1,70411 | 6,94E-17 |
| DMPK    | -1,7042  | 2,93E-06 |
| CLTA    | -1,70623 | 1,30E-17 |
| FXR1    | -1,70746 | 6,35E-13 |
| C1orf52 | -1,71045 | 7,37E-09 |
| PRKAR2A | -1,71151 | 1,75E-08 |
| FAM20C  | -1,71389 | 1,86E-10 |
| B4GALT5 | -1,71607 | 1,85E-14 |
| LDLRAP1 | -1,71715 | 8,28E-07 |
| SLC36A4 | -1,71843 | 1,78E-05 |
| C2orf74 | -1,71944 | 5,89E-06 |
| USP16   | -1,72019 | 1,95E-17 |
| SNX30   | -1,72042 | 2,45E-11 |
| PML     | -1,72081 | 4,42E-05 |
| BICD1   | -1,72204 | 8,78E-07 |
| PSMD2   | -1,72421 | 1,14E-16 |
| HCCS    | -1,72524 | 1,02E-10 |
| PANK2   | -1,72666 | 5,01E-12 |
| PTP4A2  | -1,72737 | 2,12E-18 |
| TTLL7   | -1,72855 | 1,34E-05 |
| PLIN3   | -1,72944 | 8,85E-05 |
| KCNG1   | -1,73077 | 2,15E-05 |
| PLOD1   | -1,7325  | 3,77E-12 |
| FBXO10  | -1,733   | 5,02E-07 |
| BRWD3   | -1,73376 | 0,000183 |
| SSR3    | -1,73419 | 3,24E-16 |
| PHF13   | -1,7342  | 6,20E-14 |
| ATAD5   | -1,73454 | 7,95E-06 |
| MAMLD1  | -1,73639 | 0,000359 |
| SUN2    | -1,73936 | 5,13E-17 |
| CD83    | -1,73956 | 2,01E-05 |
| PTBP2   | -1,73971 | 2,78E-06 |
| CAB39   | -1,74037 | 1,03E-17 |
| SWAP70  | -1,74175 | 9,34E-10 |
| SDC1    | -1,74243 | 3,34E-15 |
| TYW3    | -1,74268 | 4,05E-16 |
| MBOAT2  | -1,74492 | 1,11E-11 |
| PTPRG   | -1,74929 | 2,87E-10 |
| HDAC8   | -1,74992 | 7,49E-07 |
| AHI1    | -1,7505  | 2,84E-07 |
| ITGB5   | -1,75392 | 4,51E-06 |
| GNA12   | -1,75552 | 4,96E-19 |
| WWC2    | -1,76331 | 1,66E-09 |
| WSB2    | -1,76695 | 2,96E-05 |
| FURIN   | -1,76757 | 1,24E-16 |
| FHL3    | -1,76863 | 2,86E-11 |
| ZMYM6NB | -1,7697  | 0,000723 |
| ACSL1   | -1,77058 | 1,42E-14 |
| MCOLN1  | -1,77108 | 7,69E-09 |

|         |          |          |
|---------|----------|----------|
| E2F7    | -1,77113 | 8,26E-10 |
| NOL6    | -1,77139 | 7,13E-13 |
| TEX15   | -1,77179 | 1,46E-07 |
| GANC    | -1,77542 | 9,10E-06 |
| ANXA2   | -1,77557 | 1,04E-26 |
| COPRS   | -1,7773  | 4,31E-18 |
| ZNF266  | -1,77961 | 1,25E-07 |
| PPP1R7  | -1,78137 | 5,47E-10 |
| ELOVL5  | -1,78269 | 1,96E-23 |
| STIM1   | -1,78407 | 9,17E-17 |
| USP1    | -1,78475 | 8,72E-12 |
| CEP170  | -1,7881  | 8,64E-13 |
| FAM195B | -1,78974 | 2,13E-08 |
| NPLOC4  | -1,79126 | 1,00E-22 |
| SEC14L1 | -1,79136 | 3,17E-12 |
| ANKRD10 | -1,79202 | 2,76E-09 |
| ZNF462  | -1,79293 | 6,36E-09 |
| DAGLA   | -1,79323 | 0,00016  |
| XYLT1   | -1,79478 | 9,78E-10 |
| GPAT3   | -1,79609 | 0,000855 |
| NUDC    | -1,7965  | 2,51E-10 |
| BIN3    | -1,79712 | 2,17E-09 |
| SH3GLB1 | -1,79957 | 1,15E-15 |
| C1GALT1 | -1,80162 | 5,21E-14 |
| RPF1    | -1,80431 | 1,02E-14 |
| NTN4    | -1,80485 | 0,000748 |
| OAT     | -1,80546 | 1,23E-05 |
| RAB29   | -1,80568 | 3,32E-09 |
| POFUT1  | -1,80767 | 2,25E-16 |
| MAP7D3  | -1,81178 | 2,74E-21 |
| ACOT9   | -1,81456 | 8,00E-13 |
| TFDP1   | -1,81564 | 1,59E-23 |
| TSPAN4  | -1,81614 | 9,34E-07 |
| ANO6    | -1,81822 | 2,04E-13 |
| SF3A3   | -1,81964 | 3,11E-10 |
| PEX14   | -1,82155 | 1,48E-13 |
| USB1    | -1,82225 | 2,82E-07 |
| BMF     | -1,82302 | 1,00E-05 |
| TMEM201 | -1,82651 | 2,71E-15 |
| SLC35G1 | -1,82703 | 0,000899 |
| RASL10B | -1,82741 | 0,000357 |
| GOLIM4  | -1,83058 | 1,47E-13 |
| MUL1    | -1,83095 | 1,14E-15 |
| LRRC41  | -1,83201 | 1,32E-21 |
| SLC41A1 | -1,83284 | 4,73E-15 |
| RANBP6  | -1,83287 | 7,19E-09 |
| UBE2J2  | -1,83698 | 6,66E-23 |
| NKX6-1  | -1,8389  | 0,000563 |
| KAZN    | -1,83945 | 1,31E-09 |
| PPARD   | -1,84024 | 5,03E-08 |

|           |          |          |
|-----------|----------|----------|
| TGFB1     | -1,843   | 3,49E-15 |
| BAG2      | -1,8463  | 2,86E-14 |
| LPCAT4    | -1,84672 | 2,51E-06 |
| LRRC8E    | -1,8505  | 3,35E-09 |
| TPP2      | -1,85105 | 7,61E-18 |
| ARHGDI A  | -1,85106 | 1,50E-13 |
| DTX3L     | -1,85119 | 2,49E-07 |
| RMDN3     | -1,85316 | 5,17E-10 |
| ZNF274    | -1,85374 | 7,23E-12 |
| SNX25     | -1,85384 | 5,59E-08 |
| SLC25A12  | -1,85491 | 1,72E-10 |
| UBE2F     | -1,85651 | 6,00E-10 |
| LOC283788 | -1,85919 | 1,81E-05 |
| RASAL2    | -1,85968 | 9,37E-12 |
| EEF1E1    | -1,86171 | 0,000706 |
| AFF3      | -1,86212 | 0,000181 |
| CNST      | -1,86438 | 7,46E-08 |
| DNAJA1    | -1,86465 | 2,60E-11 |
| EHD4      | -1,86553 | 7,03E-15 |
| ENTHD2    | -1,86564 | 2,25E-06 |
| ZNF827    | -1,86892 | 9,67E-06 |
| RELT      | -1,86992 | 1,04E-09 |
| CCNJL     | -1,87267 | 1,45E-05 |
| TOMM34    | -1,87397 | 3,61E-16 |
| LMAN2L    | -1,87428 | 1,65E-15 |
| ATP10D    | -1,8744  | 5,44E-05 |
| GRIN2D    | -1,87593 | 2,47E-05 |
| B3GLCT    | -1,87633 | 6,82E-08 |
| SLIT2     | -1,87793 | 0,000544 |
| HECA      | -1,88114 | 3,49E-06 |
| TRMT13    | -1,88166 | 0,000693 |
| C19orf12  | -1,88326 | 3,68E-13 |
| EVI5      | -1,88386 | 1,80E-07 |
| CENPQ     | -1,88438 | 4,97E-08 |
| TMEM56    | -1,88535 | 2,32E-05 |
| C12orf4   | -1,88546 | 4,93E-11 |
| ILKAP     | -1,88836 | 7,74E-11 |
| TPRA1     | -1,88929 | 1,68E-20 |
| ZNF230    | -1,8899  | 0,000287 |
| FAM214B   | -1,89017 | 1,48E-08 |
| IFIT5     | -1,89034 | 0,0003   |
| SPATS2L   | -1,89217 | 3,14E-14 |
| CCDC18    | -1,89262 | 0,000144 |
| WIP1      | -1,89591 | 3,65E-06 |
| UROD      | -1,89632 | 6,04E-15 |
| CDC14B    | -1,89693 | 6,89E-10 |
| C16orf45  | -1,89887 | 3,95E-05 |
| PQLC2     | -1,90464 | 1,71E-10 |
| RNF145    | -1,90514 | 1,08E-06 |
| SHROOM1   | -1,90637 | 1,09E-10 |

|           |          |          |
|-----------|----------|----------|
| IFNGR2    | -1,90679 | 3,22E-09 |
| IKBIP     | -1,90701 | 4,95E-05 |
| RRAGC     | -1,91311 | 2,05E-14 |
| ERCC1     | -1,91612 | 1,45E-20 |
| GPAT4     | -1,91651 | 1,50E-12 |
| MPP6      | -1,91764 | 2,79E-16 |
| MAML2     | -1,91783 | 4,63E-05 |
| ANXA2P2   | -1,91791 | 0,00012  |
| NFATC4    | -1,91908 | 4,92E-07 |
| MACF1     | -1,92064 | 1,42E-23 |
| MYO9B     | -1,92238 | 4,77E-11 |
| TWISTNB   | -1,92392 | 1,82E-18 |
| SGK1      | -1,92419 | 0,000217 |
| CTNNAL1   | -1,92721 | 1,14E-09 |
| TNFRSF10B | -1,93185 | 4,88E-19 |
| ALAS1     | -1,93229 | 1,91E-13 |
| UAP1      | -1,93517 | 3,35E-12 |
| CAPN10    | -1,93528 | 3,13E-07 |
| LOC100125 | -1,94118 | 9,97E-12 |
| AHDC1     | -1,94475 | 1,55E-18 |
| ELF4      | -1,94951 | 2,46E-10 |
| COTL1     | -1,95139 | 2,83E-19 |
| SLC45A3   | -1,95253 | 2,72E-08 |
| WNT11     | -1,95635 | 0,000376 |
| ITPKA     | -1,9568  | 0,000203 |
| TGFB3     | -1,9582  | 0,000513 |
| KIF1B     | -1,95841 | 5,66E-12 |
| CCDC50    | -1,96251 | 1,40E-13 |
| DLC1      | -1,96298 | 5,02E-14 |
| SLFN5     | -1,96361 | 2,14E-08 |
| SIRT2     | -1,96644 | 1,12E-09 |
| EIF2AK4   | -1,9668  | 3,12E-22 |
| C12orf75  | -1,96952 | 6,60E-14 |
| RDX       | -1,96993 | 5,87E-13 |
| ABL2      | -1,97009 | 1,37E-20 |
| CDK6      | -1,97025 | 0,000495 |
| ST3GAL4   | -1,97454 | 4,80E-08 |
| PLSCR1    | -1,97473 | 5,37E-15 |
| DOCK5     | -1,97536 | 1,25E-12 |
| IPO13     | -1,97628 | 2,00E-09 |
| DNMBP     | -1,97907 | 1,42E-08 |
| USP40     | -1,98023 | 3,15E-17 |
| ANLN      | -1,98238 | 2,18E-22 |
| ETHE1     | -1,9862  | 5,55E-10 |
| ARNTL     | -1,98672 | 1,12E-05 |
| TXLNA     | -1,98679 | 3,60E-17 |
| AAK1      | -1,9891  | 1,24E-11 |
| PANK4     | -1,991   | 1,21E-13 |
| FMNL3     | -1,99328 | 4,46E-17 |
| FBLIM1    | -1,99446 | 4,16E-07 |

|           |          |          |
|-----------|----------|----------|
| SCCPDH    | -1,99603 | 3,07E-12 |
| TMX3      | -1,99741 | 3,21E-13 |
| TSHZ3     | -2,00004 | 0,000939 |
| CARD10    | -2,00109 | 1,67E-08 |
| DCTN3     | -2,0023  | 6,18E-15 |
| RRAS      | -2,00445 | 0,000102 |
| CALU      | -2,00603 | 1,51E-20 |
| TUBGCP3   | -2,00735 | 2,02E-20 |
| NOL9      | -2,00737 | 4,01E-14 |
| ODF2L     | -2,00813 | 2,05E-15 |
| LCA5      | -2,00936 | 0,000823 |
| BACE1     | -2,01315 | 2,22E-13 |
| DDA1      | -2,01331 | 4,23E-20 |
| SNX9      | -2,01599 | 6,16E-20 |
| ADORA2B   | -2,01822 | 7,04E-05 |
| PPP2CB    | -2,01865 | 2,30E-24 |
| SEPT7     | -2,01875 | 1,57E-25 |
| RASSF5    | -2,01968 | 0,000512 |
| KANK1     | -2,02231 | 2,08E-14 |
| ARFGAP3   | -2,02565 | 4,12E-12 |
| SNHG3     | -2,02573 | 2,02E-06 |
| SH3BGR13  | -2,02577 | 8,86E-08 |
| ZSCAN20   | -2,02654 | 1,24E-05 |
| FGD1      | -2,02658 | 7,06E-24 |
| ABHD6     | -2,02844 | 2,17E-05 |
| U2SURP    | -2,02906 | 1,08E-32 |
| PYGO1     | -2,02966 | 2,81E-05 |
| LOC103611 | -2,0316  | 0,000631 |
| HDAC5     | -2,03296 | 4,82E-16 |
| RBM24     | -2,03473 | 3,29E-06 |
| PBK       | -2,03475 | 6,70E-12 |
| CHST14    | -2,0354  | 6,59E-13 |
| LRRFIP1   | -2,03677 | 3,66E-29 |
| PITHD1    | -2,03915 | 1,56E-19 |
| VPS37A    | -2,04192 | 2,76E-19 |
| KAT2B     | -2,04298 | 1,01E-05 |
| ZNF530    | -2,04304 | 1,90E-06 |
| ADAM9     | -2,04535 | 6,74E-21 |
| SDC2      | -2,0478  | 5,32E-20 |
| CYLD      | -2,0563  | 0,000743 |
| RDH10     | -2,05655 | 3,48E-09 |
| BIRC2     | -2,06012 | 8,01E-12 |
| RELB      | -2,06262 | 2,57E-06 |
| MEF2D     | -2,06936 | 4,96E-11 |
| CCDC126   | -2,06957 | 2,61E-05 |
| DLEU2     | -2,07049 | 0,000678 |
| SCMH1     | -2,07371 | 1,83E-05 |
| LACTB     | -2,07407 | 0,000178 |
| PSD3      | -2,07738 | 2,41E-19 |
| SNX8      | -2,07755 | 8,20E-16 |

|           |          |          |
|-----------|----------|----------|
| PDE4A     | -2,08025 | 1,61E-11 |
| EFCAB7    | -2,08034 | 4,69E-05 |
| TCF19     | -2,0879  | 1,65E-27 |
| CLCN6     | -2,08808 | 8,30E-05 |
| SZT2      | -2,09285 | 2,62E-11 |
| SBDS      | -2,09394 | 8,46E-27 |
| UBA5      | -2,09524 | 3,40E-21 |
| PPP3CC    | -2,09749 | 3,74E-14 |
| IL13RA1   | -2,1034  | 3,00E-15 |
| FAT1      | -2,10539 | 3,07E-12 |
| JPH3      | -2,10594 | 3,00E-12 |
| AKR1C1    | -2,10787 | 0,000709 |
| ABCB7     | -2,1094  | 2,56E-14 |
| TCEB3     | -2,1097  | 6,49E-24 |
| FOXP1     | -2,11064 | 1,62E-21 |
| OGFRL1    | -2,12269 | 3,80E-12 |
| HECTD2    | -2,12416 | 4,18E-07 |
| CTSB      | -2,12797 | 3,47E-11 |
| LPXN      | -2,12819 | 5,12E-07 |
| ARL16     | -2,13232 | 4,10E-15 |
| ST5       | -2,13343 | 3,58E-08 |
| SEC61G    | -2,13514 | 1,22E-09 |
| STK17A    | -2,13567 | 2,28E-21 |
| SLC25A20  | -2,13904 | 6,96E-06 |
| PMEPA1    | -2,14107 | 1,45E-20 |
| SLC35D1   | -2,14231 | 3,59E-14 |
| SLC2A10   | -2,14371 | 1,20E-10 |
| HSPB11    | -2,14443 | 4,73E-13 |
| CHORDC1   | -2,14924 | 5,76E-24 |
| GPRC5B    | -2,15213 | 0,000287 |
| LINC00623 | -2,15383 | 3,27E-07 |
| GNG12     | -2,15618 | 2,42E-17 |
| TAP2      | -2,15677 | 1,49E-14 |
| SHISA4    | -2,15948 | 0,000732 |
| PGM3      | -2,1661  | 2,56E-14 |
| SLC25A37  | -2,16849 | 3,07E-14 |
| IMPA1     | -2,16933 | 2,21E-15 |
| STARD8    | -2,16976 | 0,000406 |
| C15orf41  | -2,17229 | 1,06E-06 |
| PMAIP1    | -2,17532 | 2,00E-08 |
| GADD45B   | -2,17825 | 0,000213 |
| CERK      | -2,17965 | 6,24E-10 |
| PITPNM2   | -2,18003 | 5,00E-10 |
| RBPMS2    | -2,18007 | 3,30E-11 |
| TMEM44    | -2,1803  | 1,13E-09 |
| SMC4      | -2,1818  | 4,31E-28 |
| CCND3     | -2,18217 | 3,61E-07 |
| HOXC4     | -2,18263 | 0,000183 |
| SMYD3     | -2,18338 | 1,27E-09 |
| TUBB2A    | -2,18358 | 6,47E-06 |



|           |          |          |
|-----------|----------|----------|
| STEAP1    | -2,18406 | 0,000687 |
| SUSD1     | -2,18711 | 4,54E-10 |
| VCL       | -2,18713 | 3,94E-11 |
| TMEM104   | -2,18801 | 1,89E-13 |
| FGFRL1    | -2,18858 | 1,02E-33 |
| TK2       | -2,18925 | 2,08E-08 |
| FOXO3     | -2,19143 | 1,41E-09 |
| CORO1C    | -2,19201 | 1,11E-29 |
| HLA-F     | -2,19425 | 0,000779 |
| CDK14     | -2,19433 | 2,05E-05 |
| CSRNP1    | -2,19435 | 7,17E-14 |
| RIMS3     | -2,2001  | 1,23E-05 |
| SLC30A7   | -2,20704 | 1,21E-15 |
| ENTPD4    | -2,20834 | 2,95E-23 |
| SERPINB8  | -2,20981 | 1,84E-06 |
| TYMP      | -2,21175 | 0,000234 |
| CCT6A     | -2,21501 | 2,66E-31 |
| CYTH3     | -2,21598 | 1,12E-20 |
| ANKH      | -2,21682 | 3,52E-19 |
| RTCA      | -2,21699 | 4,29E-22 |
| PFKFB3    | -2,21864 | 4,47E-10 |
| JMJD6     | -2,22357 | 3,16E-12 |
| LOC101927 | -2,23239 | 0,000327 |
| CPEB4     | -2,24004 | 1,59E-05 |
| TSHZ1     | -2,2405  | 1,72E-12 |
| HACD1     | -2,24505 | 8,19E-10 |
| TMEM55A   | -2,2473  | 4,80E-12 |
| ITPR1     | -2,24965 | 6,27E-13 |
| ARL4C     | -2,25299 | 1,27E-22 |
| S100A6    | -2,25311 | 1,13E-11 |
| PCDHGC3   | -2,25496 | 7,45E-15 |
| MEIS1     | -2,2582  | 0,000797 |
| SLC17A5   | -2,26314 | 6,75E-09 |
| LTBP2     | -2,26563 | 5,74E-06 |
| HYI       | -2,26683 | 4,19E-06 |
| CLSPN     | -2,26741 | 8,05E-21 |
| TIGD7     | -2,26808 | 1,17E-07 |
| WDR90     | -2,26919 | 0,000998 |
| TCEAL3    | -2,27344 | 3,44E-15 |
| SORBS3    | -2,27361 | 3,13E-23 |
| NEK6      | -2,27376 | 5,80E-29 |
| TTN-AS1   | -2,27618 | 1,90E-05 |
| MOCOS     | -2,27734 | 2,52E-08 |
| LOC10013C | -2,27873 | 0,000417 |
| GPR180    | -2,27976 | 1,71E-19 |
| DLX1      | -2,28571 | 1,06E-12 |
| COLGALT1  | -2,28772 | 1,42E-39 |
| PAK1      | -2,2938  | 1,17E-11 |
| CAP1      | -2,29385 | 8,14E-24 |
| EOGT      | -2,29536 | 1,61E-09 |

|           |          |          |
|-----------|----------|----------|
| FZD7      | -2,29635 | 1,22E-18 |
| SH2D5     | -2,29708 | 0,000312 |
| ADCY9     | -2,30274 | 9,45E-15 |
| TMSB4X    | -2,30452 | 5,75E-35 |
| FMNL1     | -2,30575 | 1,67E-15 |
| DYRK3     | -2,30789 | 3,73E-15 |
| ZC2HC1A   | -2,30916 | 8,32E-08 |
| MAPKBP1   | -2,30969 | 1,55E-10 |
| SAMD11    | -2,31125 | 5,95E-06 |
| FAM114A1  | -2,31586 | 3,89E-07 |
| TREX1     | -2,31763 | 7,60E-08 |
| ST3GAL3   | -2,31774 | 1,65E-08 |
| SMARCD3   | -2,31931 | 5,07E-13 |
| HHLA3     | -2,32535 | 3,27E-13 |
| RLTPR     | -2,32606 | 1,00E-10 |
| MFGE8     | -2,32611 | 6,04E-12 |
| ATP8B2    | -2,32973 | 3,03E-24 |
| COPS8     | -2,32997 | 1,47E-26 |
| C11orf63  | -2,33181 | 2,14E-09 |
| FNTA      | -2,33184 | 2,02E-29 |
| SFXN3     | -2,33253 | 4,45E-11 |
| ANKRD13C  | -2,33799 | 3,03E-20 |
| LIMD2     | -2,33922 | 1,94E-05 |
| METRNL    | -2,34178 | 3,75E-34 |
| CHM       | -2,34251 | 1,36E-07 |
| POMZP3    | -2,34252 | 1,51E-14 |
| FNDC3B    | -2,34376 | 7,57E-22 |
| SMS       | -2,34411 | 7,44E-22 |
| FERMT2    | -2,34907 | 4,65E-26 |
| JAK1      | -2,35013 | 1,41E-20 |
| STOML1    | -2,35027 | 1,44E-09 |
| KCNJ14    | -2,35356 | 4,61E-06 |
| TMCC1-AS1 | -2,35932 | 0,000163 |
| RGS5      | -2,36812 | 6,08E-05 |
| TEX30     | -2,36941 | 1,08E-14 |
| TRAM2     | -2,3719  | 2,83E-39 |
| BHLHE40   | -2,37235 | 4,29E-26 |
| BTG3      | -2,38085 | 1,28E-07 |
| BIVM      | -2,38156 | 2,28E-06 |
| EXTL3     | -2,38425 | 2,97E-33 |
| PCDHGB2   | -2,38918 | 3,56E-07 |
| FGF18     | -2,38952 | 0,000194 |
| CHST7     | -2,39288 | 3,98E-05 |
| IRF1      | -2,39433 | 7,71E-13 |
| MED8      | -2,39539 | 6,36E-26 |
| GPX8      | -2,39848 | 1,14E-24 |
| FTL       | -2,39888 | 3,02E-11 |
| ECHDC1    | -2,40079 | 1,18E-17 |
| KCNQ5     | -2,40351 | 4,51E-05 |
| ZNF223    | -2,40539 | 0,000135 |

|           |          |          |
|-----------|----------|----------|
| LINC01128 | -2,407   | 6,08E-10 |
| MTCL1     | -2,40791 | 7,83E-12 |
| SLC12A8   | -2,40881 | 5,83E-16 |
| SBF2      | -2,41162 | 5,99E-08 |
| GFPT2     | -2,41674 | 2,03E-09 |
| TUB       | -2,4198  | 2,14E-13 |
| SCRN1     | -2,42432 | 6,33E-37 |
| NXPE3     | -2,42617 | 6,27E-06 |
| ENC1      | -2,4271  | 6,08E-18 |
| RABGGTB   | -2,43454 | 6,67E-28 |
| SPSB1     | -2,43786 | 8,68E-07 |
| GOLM1     | -2,44098 | 1,98E-35 |
| GPR68     | -2,44406 | 4,92E-08 |
| EFHD2     | -2,44476 | 3,01E-23 |
| CPOX      | -2,44775 | 5,33E-11 |
| POFUT2    | -2,449   | 3,26E-17 |
| TCF12     | -2,44936 | 1,93E-17 |
| SDC4      | -2,44969 | 2,95E-18 |
| PHLDB1    | -2,45086 | 5,05E-32 |
| ARMC9     | -2,45646 | 1,71E-25 |
| FAF1      | -2,45805 | 5,69E-13 |
| CAPRIN2   | -2,46388 | 4,70E-17 |
| CFL2      | -2,46456 | 1,73E-19 |
| RTTN      | -2,46833 | 3,71E-10 |
| AHNAK2    | -2,46886 | 2,30E-15 |
| KLF13     | -2,47342 | 5,37E-38 |
| OSMR      | -2,47381 | 3,10E-11 |
| IL6ST     | -2,47696 | 4,17E-19 |
| DUSP7     | -2,48431 | 1,67E-09 |
| TIPARP    | -2,48493 | 1,91E-20 |
| CAMK2D    | -2,48825 | 6,45E-19 |
| MYO10     | -2,49005 | 9,64E-30 |
| BEND6     | -2,49115 | 1,08E-05 |
| EVA1B     | -2,49492 | 7,57E-07 |
| FAM89A    | -2,49558 | 1,38E-05 |
| DLX2      | -2,49663 | 7,00E-14 |
| DCLK2     | -2,49768 | 0,000106 |
| KLHL21    | -2,49781 | 2,14E-34 |
| PLAGL1    | -2,4984  | 2,57E-10 |
| SDCBP     | -2,49847 | 6,81E-16 |
| TACC1     | -2,49862 | 9,00E-38 |
| HOXC9     | -2,50045 | 5,53E-06 |
| PRPS1     | -2,50095 | 1,71E-25 |
| CHST12    | -2,50432 | 7,06E-24 |
| MYO1E     | -2,51007 | 5,87E-10 |
| NAV2      | -2,51706 | 8,82E-18 |
| CD59      | -2,5174  | 1,20E-12 |
| CKAP4     | -2,51766 | 7,64E-50 |
| SEC14L2   | -2,52034 | 4,54E-07 |
| ARNTL2    | -2,52789 | 3,92E-13 |

|           |          |          |
|-----------|----------|----------|
| LACC1     | -2,52831 | 8,12E-09 |
| PDP1      | -2,52987 | 2,76E-28 |
| GLS       | -2,53261 | 5,02E-31 |
| MAFG      | -2,53667 | 1,70E-27 |
| PLEKHO2   | -2,53696 | 3,12E-14 |
| SRGAP2D   | -2,54075 | 8,05E-09 |
| RIN3      | -2,54574 | 4,44E-10 |
| INAFM2    | -2,54698 | 4,69E-09 |
| TIAM2     | -2,54944 | 3,02E-11 |
| QPCT      | -2,55168 | 5,77E-07 |
| SETBP1    | -2,55565 | 0,000272 |
| IFFO2     | -2,55867 | 2,88E-21 |
| CIRBP-AS1 | -2,56025 | 0,000439 |
| TPST2     | -2,56299 | 1,60E-15 |
| KLF12     | -2,56348 | 3,50E-13 |
| SHROOM2   | -2,56822 | 9,53E-14 |
| DGKD      | -2,56889 | 8,85E-29 |
| PRNP      | -2,57325 | 3,30E-20 |
| NFIL3     | -2,57418 | 1,14E-06 |
| MFSD1     | -2,57837 | 9,64E-18 |
| ARPIN     | -2,58162 | 2,29E-11 |
| PARVA     | -2,58176 | 8,62E-22 |
| RILPL2    | -2,58646 | 2,53E-05 |
| SLC35E4   | -2,59108 | 7,64E-15 |
| ABHD2     | -2,59128 | 3,83E-23 |
| GULP1     | -2,59252 | 1,86E-05 |
| SEPT10    | -2,59612 | 4,14E-08 |
| TIMP3     | -2,59833 | 3,13E-13 |
| DNAJC3    | -2,60028 | 6,05E-18 |
| FKBP7     | -2,60241 | 3,54E-11 |
| PRKD1     | -2,60407 | 2,92E-06 |
| ATL1      | -2,60419 | 0,000106 |
| KDELC1    | -2,60647 | 1,77E-15 |
| MT2A      | -2,6086  | 2,70E-38 |
| ZIC2      | -2,60911 | 2,26E-12 |
| RECK      | -2,61141 | 5,65E-05 |
| LRP12     | -2,61466 | 1,97E-28 |
| ADGRE5    | -2,61779 | 9,00E-13 |
| PHEX      | -2,62029 | 0,000679 |
| SMAP2     | -2,62033 | 7,84E-11 |
| TFPI      | -2,6216  | 6,72E-06 |
| TTC14     | -2,62183 | 1,36E-17 |
| CAPG      | -2,62328 | 8,83E-36 |
| TRIM7     | -2,6258  | 6,32E-06 |
| KCTD7     | -2,62633 | 6,71E-13 |
| PVR       | -2,62908 | 2,58E-13 |
| TAPBPL    | -2,63144 | 0,000402 |
| LIMA1     | -2,63149 | 1,23E-13 |
| ANKMY2    | -2,63261 | 2,94E-20 |
| RUNX1     | -2,63323 | 1,40E-38 |

|           |          |          |
|-----------|----------|----------|
| SYNJ1     | -2,63512 | 1,06E-16 |
| KIAA0355  | -2,63791 | 1,44E-22 |
| ITM2C     | -2,63902 | 5,02E-21 |
| MEG3      | -2,6416  | 0,00066  |
| STEAP3    | -2,66356 | 1,54E-22 |
| LOC103091 | -2,66763 | 4,35E-07 |
| STARD3NL  | -2,67029 | 3,19E-17 |
| UAP1L1    | -2,6712  | 3,02E-19 |
| GLIPR2    | -2,67156 | 1,19E-10 |
| SLCO3A1   | -2,67859 | 2,63E-21 |
| HOXC6     | -2,68654 | 6,43E-09 |
| ZNF222    | -2,68738 | 3,01E-05 |
| GRB10     | -2,68828 | 4,82E-06 |
| IL1RAP    | -2,69091 | 3,88E-06 |
| RBMS2     | -2,69134 | 1,24E-14 |
| B3GNTL1   | -2,69241 | 4,46E-10 |
| MICAL1    | -2,71079 | 2,28E-09 |
| PPAP2B    | -2,71403 | 2,06E-12 |
| DAAM2     | -2,71418 | 1,87E-08 |
| C8orf48   | -2,71481 | 4,85E-08 |
| LINC00641 | -2,71504 | 1,29E-12 |
| ID3       | -2,71516 | 2,28E-14 |
| OAS2      | -2,71719 | 0,000923 |
| CDKN2B    | -2,72269 | 6,57E-15 |
| ZBTB47    | -2,72539 | 0,000108 |
| CLTCL1    | -2,72575 | 8,57E-13 |
| SOCS3     | -2,729   | 7,91E-18 |
| SCN1B     | -2,73002 | 8,63E-05 |
| LOC90768  | -2,73547 | 1,06E-12 |
| MGAT5B    | -2,73772 | 1,80E-10 |
| LHFPL2    | -2,73857 | 2,16E-32 |
| APBA1     | -2,73874 | 6,33E-11 |
| DNAJC3-AS | -2,74005 | 3,51E-05 |
| TOR4A     | -2,74109 | 9,61E-13 |
| RGL1      | -2,74494 | 2,04E-15 |
| RTN4RL2   | -2,74869 | 1,94E-05 |
| SERINC2   | -2,75879 | 1,08E-16 |
| BASP1     | -2,76458 | 1,79E-07 |
| GALNT2    | -2,76578 | 1,30E-43 |
| SMCO4     | -2,76728 | 1,87E-08 |
| LGALS3    | -2,77378 | 2,81E-12 |
| SMIM3     | -2,77592 | 7,51E-27 |
| ADORA1    | -2,77655 | 1,99E-08 |
| WNT5A     | -2,77889 | 6,25E-19 |
| MCC       | -2,78092 | 2,21E-15 |
| CEP19     | -2,78644 | 5,86E-11 |
| DNAJB5    | -2,79072 | 1,42E-08 |
| SDCBP2-AS | -2,80055 | 3,15E-05 |
| CPM       | -2,80344 | 4,52E-05 |
| KIF13B    | -2,80582 | 1,11E-08 |

|           |          |          |
|-----------|----------|----------|
| CLN5      | -2,80905 | 9,31E-13 |
| L3MBTL3   | -2,81076 | 8,01E-16 |
| SMAD3     | -2,81329 | 7,27E-19 |
| C14orf159 | -2,8143  | 1,04E-07 |
| HOXA4     | -2,81522 | 8,38E-09 |
| LGALS1    | -2,81637 | 1,56E-19 |
| BTN2A1    | -2,82112 | 4,74E-11 |
| CTSL      | -2,8224  | 5,49E-17 |
| PORCN     | -2,82763 | 1,10E-10 |
| IL15RA    | -2,82905 | 9,39E-09 |
| BTN3A1    | -2,82984 | 0,000188 |
| TIAM1     | -2,83299 | 1,22E-17 |
| GNPDA2    | -2,83846 | 2,49E-13 |
| EYA2      | -2,84375 | 2,93E-08 |
| CCDC82    | -2,84775 | 2,38E-10 |
| KCNMA1    | -2,85122 | 1,79E-08 |
| NUPL2     | -2,85169 | 3,31E-09 |
| SRPX      | -2,85814 | 0,000518 |
| KIF26B    | -2,85976 | 2,92E-11 |
| NXN       | -2,86706 | 9,27E-43 |
| CNTLN     | -2,87148 | 6,91E-17 |
| OSTM1     | -2,87251 | 1,17E-08 |
| CPQ       | -2,87506 | 2,03E-06 |
| FAM92A1   | -2,88067 | 2,13E-08 |
| SOX9      | -2,88397 | 2,53E-05 |
| PPP1R18   | -2,88863 | 7,08E-34 |
| MAMSTR    | -2,89644 | 3,64E-06 |
| P4HA2     | -2,89771 | 7,06E-21 |
| ANKRD44   | -2,89998 | 4,15E-05 |
| OPTN      | -2,90045 | 2,17E-07 |
| TRIP10    | -2,90082 | 1,97E-18 |
| PTPN14    | -2,90416 | 1,19E-41 |
| AKAP7     | -2,90418 | 4,71E-05 |
| MIR22HG   | -2,90566 | 4,36E-11 |
| ZFAT      | -2,91393 | 1,33E-31 |
| IL6R      | -2,91765 | 0,000255 |
| FRRS1     | -2,92091 | 7,90E-06 |
| CAV2      | -2,93639 | 1,40E-17 |
| HERC3     | -2,93772 | 8,19E-10 |
| PCOLCE2   | -2,93835 | 7,09E-14 |
| ITGA3     | -2,94032 | 5,72E-56 |
| TIMP1     | -2,94142 | 4,00E-08 |
| HOXB9     | -2,94565 | 0,00062  |
| HIVEP3    | -2,94787 | 2,35E-05 |
| B2M       | -2,94991 | 3,38E-20 |
| HNMT      | -2,95041 | 1,16E-06 |
| HTATSF1P2 | -2,95342 | 1,12E-07 |
| CLCF1     | -2,95846 | 6,15E-05 |
| ST6GALNA4 | -2,95916 | 1,20E-12 |
| CHIC1     | -2,96313 | 8,82E-10 |

|           |          |          |
|-----------|----------|----------|
| CDKN2C    | -2,96347 | 3,20E-43 |
| DEGS1     | -2,96539 | 2,26E-25 |
| TGFB2     | -2,97049 | 1,19E-21 |
| ZNF155    | -2,97498 | 1,20E-08 |
| SOAT1     | -2,97605 | 5,44E-41 |
| SNORA73A  | -2,97791 | 4,91E-05 |
| CD82      | -2,98559 | 1,87E-24 |
| ARHGEF10  | -2,98601 | 3,60E-17 |
| KIAA1549L | -2,99429 | 8,86E-10 |
| SH3BGR1   | -2,99469 | 4,94E-24 |
| ADGRB2    | -2,99589 | 2,03E-17 |
| ANK2      | -3,00156 | 1,32E-06 |
| SH2D4A    | -3,00248 | 9,02E-46 |
| MX2       | -3,00427 | 1,43E-07 |
| FLOT1     | -3,00649 | 2,41E-52 |
| FAM219A   | -3,00652 | 9,56E-15 |
| ATP6V1B2  | -3,00709 | 6,46E-57 |
| SQRDL     | -3,00836 | 1,25E-11 |
| DENND5B   | -3,01756 | 3,15E-22 |
| LOC389831 | -3,0197  | 3,42E-15 |
| FGFR1     | -3,02053 | 1,74E-58 |
| ITPR1     | -3,02269 | 7,05E-11 |
| IGFBP6    | -3,02852 | 4,60E-05 |
| GPATCH11  | -3,02859 | 6,67E-33 |
| VEPH1     | -3,02912 | 2,33E-06 |
| PTHLH     | -3,03324 | 5,11E-10 |
| GYG2      | -3,04013 | 1,80E-10 |
| HMG5      | -3,04619 | 0,000357 |
| AMIGO3    | -3,05141 | 7,72E-18 |
| PLD2      | -3,05751 | 7,83E-57 |
| TNFAIP3   | -3,06335 | 6,72E-08 |
| KIAA0930  | -3,06364 | 1,87E-29 |
| FAM13A    | -3,06884 | 1,60E-08 |
| SH3BP4    | -3,07788 | 4,98E-41 |
| ZIC5      | -3,07832 | 2,32E-05 |
| DNM1      | -3,07981 | 2,09E-30 |
| PPP1R15A  | -3,08103 | 3,01E-29 |
| FNIP2     | -3,08889 | 3,45E-08 |
| SLC22A15  | -3,08969 | 7,83E-05 |
| SYNPO     | -3,09677 | 3,64E-10 |
| SLC37A2   | -3,097   | 6,86E-06 |
| ARHGAP24  | -3,09798 | 2,25E-07 |
| FAM49A    | -3,10003 | 0,000683 |
| PEA15     | -3,10311 | 4,97E-45 |
| CMTM7     | -3,10875 | 1,45E-12 |
| TMEM140   | -3,11048 | 5,57E-05 |
| EPHX4     | -3,11112 | 3,80E-05 |
| LRRC8C    | -3,1177  | 1,10E-12 |
| HOOK3     | -3,12525 | 2,11E-31 |
| FMN1      | -3,13188 | 1,47E-10 |

|           |          |          |
|-----------|----------|----------|
| HSPA6     | -3,1395  | 5,93E-05 |
| OAF       | -3,14036 | 9,78E-25 |
| EPHB2     | -3,14279 | 1,63E-64 |
| DDX60L    | -3,16222 | 3,57E-13 |
| KIAA1024  | -3,16315 | 1,38E-06 |
| LDLRAD4   | -3,1676  | 0,000162 |
| GPC4      | -3,16849 | 1,02E-37 |
| LMO7      | -3,18128 | 6,45E-43 |
| ROR1      | -3,18201 | 1,43E-13 |
| SLC39A14  | -3,18252 | 1,61E-17 |
| NIPAL3    | -3,18362 | 1,99E-18 |
| RGS2      | -3,18547 | 2,78E-09 |
| AKR1B10   | -3,20333 | 0,00063  |
| PEX6      | -3,20665 | 1,24E-11 |
| ARAP3     | -3,20742 | 6,58E-09 |
| CD44      | -3,21251 | 6,91E-53 |
| ZBTB38    | -3,21845 | 2,61E-42 |
| FAM126A   | -3,21944 | 1,09E-25 |
| ARMCX1    | -3,22048 | 9,20E-12 |
| EXTL2     | -3,22331 | 3,42E-26 |
| TRIM47    | -3,22526 | 2,32E-21 |
| CRIM1     | -3,22804 | 1,47E-25 |
| DCBLD1    | -3,24234 | 5,21E-28 |
| HS3ST3B1  | -3,24533 | 4,73E-23 |
| MAP7D1    | -3,24966 | 8,50E-43 |
| P3H2      | -3,25244 | 2,41E-43 |
| STPG1     | -3,25683 | 1,38E-26 |
| CYP4V2    | -3,2572  | 3,64E-07 |
| ANKRD13A  | -3,25898 | 1,68E-21 |
| PDGFC     | -3,25939 | 4,03E-10 |
| FSTL3     | -3,25965 | 1,28E-19 |
| STK17B    | -3,26844 | 4,82E-40 |
| NKX3-1    | -3,26929 | 2,23E-17 |
| GXYLT2    | -3,26963 | 1,33E-13 |
| PGM1      | -3,27006 | 4,32E-33 |
| ZFP37     | -3,28436 | 3,69E-06 |
| ECE1      | -3,28712 | 6,24E-53 |
| PALM2     | -3,29498 | 1,20E-06 |
| WNK3      | -3,30404 | 0,000383 |
| C16orf62  | -3,31257 | 2,18E-31 |
| SLC7A8    | -3,32626 | 2,75E-20 |
| ETV4      | -3,33406 | 0,000156 |
| NAV1      | -3,33458 | 4,98E-14 |
| DDX11L2   | -3,33846 | 0,000896 |
| LINC00152 | -3,33997 | 1,17E-11 |
| HNRNPU-A  | -3,34238 | 3,25E-10 |
| FAM225A   | -3,34625 | 0,000704 |
| LOC101925 | -3,34777 | 0,000596 |
| CARS2     | -3,34844 | 2,55E-68 |
| THRB      | -3,34926 | 1,93E-16 |



|           |          |          |
|-----------|----------|----------|
| HOXD8     | -3,35115 | 3,20E-06 |
| LOC344887 | -3,35148 | 0,001006 |
| GPC1      | -3,35423 | 9,41E-52 |
| GABARAPL  | -3,35811 | 3,46E-05 |
| PCOLCE    | -3,36205 | 2,09E-36 |
| ANO7      | -3,36221 | 2,12E-05 |
| ADGRL2    | -3,36488 | 2,20E-38 |
| DLG4      | -3,36893 | 9,67E-13 |
| SNAI1     | -3,36986 | 6,84E-16 |
| AHRR      | -3,37398 | 2,61E-08 |
| ALPL      | -3,37659 | 1,16E-07 |
| RCAN2     | -3,39687 | 3,74E-05 |
| GALNT10   | -3,40887 | 8,15E-71 |
| RRAGD     | -3,41302 | 4,55E-20 |
| LRRK1     | -3,41435 | 2,26E-15 |
| PKDCC     | -3,4194  | 0,000284 |
| SMPD1     | -3,43822 | 1,09E-13 |
| STRIP2    | -3,44243 | 3,65E-17 |
| CMTM3     | -3,44517 | 2,49E-21 |
| ZNF532    | -3,45683 | 5,33E-55 |
| C3        | -3,46684 | 0,000566 |
| LINC-PINT | -3,46939 | 2,08E-05 |
| SPEG      | -3,47269 | 1,42E-19 |
| RHOBTB2   | -3,47434 | 1,07E-38 |
| ZNF697    | -3,48161 | 1,73E-33 |
| FAM198B   | -3,49064 | 1,16E-49 |
| FKBP14    | -3,49483 | 4,87E-49 |
| ZNF382    | -3,50902 | 1,16E-05 |
| SLC6A8    | -3,51672 | 1,50E-21 |
| SPRY2     | -3,51717 | 2,24E-18 |
| DCBLD2    | -3,52407 | 3,63E-41 |
| TLN2      | -3,52452 | 9,36E-33 |
| GOLGA8B   | -3,52469 | 9,24E-06 |
| SH3RF2    | -3,52749 | 4,70E-11 |
| MITF      | -3,52851 | 9,49E-06 |
| PCDHB17P  | -3,52915 | 9,10E-06 |
| CPEB1     | -3,53066 | 4,93E-15 |
| MAP3K14   | -3,53293 | 1,48E-21 |
| COL6A1    | -3,53357 | 6,43E-72 |
| CRAT      | -3,53359 | 2,05E-12 |
| MT1X      | -3,5365  | 7,03E-58 |
| SLFN11    | -3,54345 | 7,26E-23 |
| ACO1      | -3,544   | 4,84E-27 |
| SH3PXD2B  | -3,54512 | 5,22E-59 |
| LCTL      | -3,55029 | 1,76E-06 |
| CCR1      | -3,55178 | 8,42E-05 |
| SIPA1     | -3,55758 | 1,61E-32 |
| PITX2     | -3,55819 | 7,29E-13 |
| CEP112    | -3,55832 | 6,64E-17 |
| ZCCHC24   | -3,55915 | 2,41E-16 |

|         |          |          |
|---------|----------|----------|
| CUEDC1  | -3,55962 | 2,34E-68 |
| LAMB3   | -3,55982 | 0,000199 |
| HLA-A   | -3,56923 | 1,15E-41 |
| UBASH3B | -3,57276 | 1,02E-16 |
| PALLD   | -3,57492 | 3,10E-33 |
| TNS3    | -3,57524 | 3,69E-31 |
| FAM13C  | -3,57696 | 6,63E-05 |
| MAP1B   | -3,57702 | 1,29E-22 |
| CADPS2  | -3,57936 | 0,000165 |
| DNAJB4  | -3,5845  | 3,28E-12 |
| EXT1    | -3,58455 | 6,41E-51 |
| NDRG1   | -3,586   | 1,47E-42 |
| MICB    | -3,59409 | 5,70E-23 |
| SIK1    | -3,59551 | 0,000332 |
| SYNJ2   | -3,59604 | 4,38E-68 |
| ARMC4   | -3,6001  | 0,000572 |
| LRP1    | -3,6006  | 7,42E-11 |
| CCDC88A | -3,61209 | 1,89E-47 |
| PXDN    | -3,61588 | 2,82E-46 |
| BTN3A3  | -3,61687 | 1,07E-06 |
| PTPRB   | -3,61776 | 0,000276 |
| ACSL4   | -3,62118 | 3,61E-42 |
| DYSF    | -3,63922 | 4,84E-07 |
| WTIP    | -3,64055 | 3,37E-23 |
| BMP1    | -3,6408  | 1,31E-60 |
| ELL2    | -3,64403 | 4,98E-33 |
| RARB    | -3,65022 | 6,31E-09 |
| AGPAT4  | -3,65305 | 1,08E-12 |
| ATAD3B  | -3,65323 | 8,62E-25 |
| PLEKHF1 | -3,65645 | 9,29E-14 |
| ULBP3   | -3,66286 | 1,72E-08 |
| TPM1    | -3,66671 | 2,04E-98 |
| ELFN2   | -3,68181 | 9,36E-11 |
| SYDE1   | -3,6829  | 5,74E-41 |
| GLRB    | -3,68856 | 4,83E-09 |
| FOSL2   | -3,70529 | 2,30E-56 |
| GBP2    | -3,70853 | 1,04E-05 |
| PLXND1  | -3,71261 | 1,20E-39 |
| LYST    | -3,71783 | 3,56E-20 |
| TRIM22  | -3,71797 | 0,000248 |
| GNB4    | -3,72158 | 1,04E-45 |
| RAB31   | -3,72355 | 2,04E-21 |
| PXDC1   | -3,72693 | 3,73E-53 |
| FRMD5   | -3,73425 | 2,85E-26 |
| SASH1   | -3,73653 | 1,20E-18 |
| VOPP1   | -3,7397  | 1,14E-60 |
| PLEKHA2 | -3,74471 | 1,49E-31 |
| MB21D1  | -3,77563 | 4,16E-33 |
| PCDHB5  | -3,77924 | 3,20E-05 |
| MRAS    | -3,78045 | 1,67E-36 |

|           |          |          |
|-----------|----------|----------|
| PROCR     | -3,78255 | 5,63E-08 |
| LIF       | -3,8009  | 1,46E-11 |
| EVC2      | -3,80308 | 5,15E-13 |
| GLI3      | -3,80411 | 1,84E-43 |
| ARL4D     | -3,81837 | 1,67E-31 |
| MAPRE2    | -3,82033 | 3,43E-32 |
| SHOX2     | -3,82124 | 1,55E-35 |
| TMEM133   | -3,82624 | 4,04E-05 |
| HDAC4     | -3,82672 | 1,78E-11 |
| RPLP0P2   | -3,83043 | 2,50E-11 |
| SEC14L1P1 | -3,83107 | 6,80E-06 |
| SLC12A4   | -3,83267 | 2,08E-10 |
| RAB11FIP5 | -3,83849 | 3,72E-19 |
| ISPD      | -3,85119 | 1,40E-05 |
| CCDC106   | -3,86041 | 1,91E-11 |
| IL6       | -3,86244 | 0,000234 |
| CGNL1     | -3,86263 | 7,65E-07 |
| TCF7      | -3,86487 | 5,22E-46 |
| SH2B3     | -3,86954 | 1,46E-50 |
| EHD2      | -3,86964 | 7,72E-66 |
| RASA3     | -3,8791  | 2,11E-48 |
| COPZ2     | -3,88535 | 3,08E-21 |
| FAM171A1  | -3,90173 | 2,11E-55 |
| AMIGO2    | -3,90287 | 1,48E-65 |
| TRPC1     | -3,90355 | 1,33E-17 |
| MXRA7     | -3,90956 | 1,08E-38 |
| COL27A1   | -3,92025 | 6,45E-15 |
| IL4R      | -3,93292 | 7,43E-27 |
| C5orf56   | -3,93653 | 2,53E-05 |
| AKAP12    | -3,94018 | 8,98E-36 |
| GPNMB     | -3,94093 | 1,06E-33 |
| UPP1      | -3,94351 | 1,76E-11 |
| TRIM6     | -3,94933 | 9,68E-06 |
| SPHK1     | -3,95457 | 9,26E-62 |
| SPOCK1    | -3,95684 | 2,56E-22 |
| SUGCT     | -3,96763 | 3,07E-08 |
| ELK3      | -3,977   | 1,72E-28 |
| MAFB      | -3,98747 | 3,10E-37 |
| TRIB2     | -3,98849 | 1,82E-41 |
| DSC1      | -3,99617 | 1,89E-08 |
| MARCKS    | -4,00348 | 1,76E-75 |
| CHSY3     | -4,02352 | 4,12E-22 |
| DACT3     | -4,0259  | 2,80E-05 |
| HOXA1     | -4,04308 | 2,48E-15 |
| TBXA2R    | -4,04478 | 0,00049  |
| FAM72C    | -4,055   | 9,82E-10 |
| PRICKLE1  | -4,06162 | 7,34E-10 |
| IL1R1     | -4,06203 | 3,21E-11 |
| HOXA7     | -4,06792 | 2,66E-07 |
| CHST3     | -4,07249 | 5,29E-12 |

|          |          |          |
|----------|----------|----------|
| RCAN1    | -4,08598 | 6,85E-40 |
| PPM1K    | -4,0968  | 5,59E-20 |
| UCHL1    | -4,11548 | 5,68E-08 |
| FOXD1    | -4,12038 | 3,78E-12 |
| ICAM1    | -4,12178 | 9,35E-18 |
| PTRF     | -4,12421 | 1,62E-70 |
| HOXA-AS2 | -4,1257  | 4,53E-05 |
| ZNF264   | -4,12973 | 3,49E-30 |
| IGFBP3   | -4,13859 | 3,07E-14 |
| BCAR3    | -4,14113 | 2,20E-64 |
| APLN     | -4,14736 | 1,39E-05 |
| SYNDIG1  | -4,14823 | 4,08E-06 |
| TAGLN    | -4,15251 | 6,48E-22 |
| FAM101B  | -4,15382 | 9,01E-49 |
| RAB3B    | -4,16447 | 3,24E-36 |
| ELMOD1   | -4,16495 | 1,16E-05 |
| PCDHB7   | -4,17204 | 0,000137 |
| TMEM255f | -4,17597 | 5,64E-05 |
| CDC42EP3 | -4,17844 | 1,23E-49 |
| P3H1     | -4,17953 | 1,10E-80 |
| APBB1    | -4,18303 | 2,26E-22 |
| MX1      | -4,19587 | 1,62E-19 |
| TIMP2    | -4,20348 | 2,54E-93 |
| PAG1     | -4,20449 | 3,71E-30 |
| HOXC8    | -4,21169 | 3,06E-08 |
| F3       | -4,2196  | 4,55E-25 |
| FHOD3    | -4,22999 | 2,81E-11 |
| COL24A1  | -4,23078 | 0,000276 |
| ARHGEF6  | -4,23575 | 1,96E-28 |
| FZD8     | -4,24149 | 1,55E-10 |
| HMCN1    | -4,24459 | 3,91E-37 |
| NCF2     | -4,25259 | 1,99E-05 |
| CUBN     | -4,26548 | 5,84E-05 |
| TGFB2    | -4,26797 | 1,54E-12 |
| HBEGF    | -4,28068 | 3,02E-42 |
| SEMA3A   | -4,28884 | 1,12E-10 |
| BTN3A2   | -4,29105 | 4,27E-12 |
| CLIC2    | -4,29483 | 8,79E-06 |
| GPB1     | -4,29536 | 1,45E-20 |
| ZNF880   | -4,29653 | 6,47E-14 |
| KRT81    | -4,31227 | 3,84E-05 |
| PELI2    | -4,31887 | 6,54E-05 |
| S100A4   | -4,31909 | 1,78E-50 |
| CLCN4    | -4,32167 | 3,33E-27 |
| ITGB2    | -4,33929 | 4,14E-10 |
| SYNM     | -4,34355 | 4,61E-41 |
| APOL1    | -4,36225 | 2,06E-06 |
| NDNF     | -4,3722  | 1,77E-39 |
| MGLL     | -4,3797  | 3,92E-27 |
| EPHA2    | -4,38078 | 6,37E-35 |

|          |          |          |
|----------|----------|----------|
| MEF2C    | -4,39084 | 1,54E-26 |
| PTGR1    | -4,40329 | 2,70E-38 |
| SLC16A3  | -4,40509 | 1,26E-22 |
| RUSC2    | -4,41873 | 3,09E-44 |
| MSRB3    | -4,42689 | 4,42E-39 |
| FAT4     | -4,43277 | 6,37E-14 |
| BIRC3    | -4,4371  | 1,47E-09 |
| IGF2BP2  | -4,44229 | 1,48E-81 |
| PCDH10   | -4,44903 | 1,91E-07 |
| SORBS2   | -4,4581  | 1,01E-10 |
| P2RX7    | -4,45983 | 0,000505 |
| EPDR1    | -4,46229 | 5,97E-53 |
| STARD9   | -4,47031 | 2,41E-14 |
| FILIP1L  | -4,47055 | 4,10E-31 |
| TBC1D2   | -4,47344 | 6,76E-29 |
| PLIN2    | -4,47631 | 1,36E-57 |
| SLC16A7  | -4,49895 | 8,32E-12 |
| ZNF221   | -4,50344 | 3,11E-05 |
| MEFV     | -4,50876 | 3,14E-05 |
| APOLD1   | -4,52063 | 4,46E-08 |
| C10orf11 | -4,52885 | 1,26E-09 |
| SLC2A3   | -4,52978 | 1,28E-11 |
| CPVL     | -4,54273 | 8,96E-12 |
| HOTAIRM1 | -4,54842 | 6,14E-14 |
| C17orf51 | -4,55346 | 3,82E-25 |
| PLEKHA4  | -4,57246 | 1,77E-17 |
| KCTD12   | -4,57606 | 1,56E-44 |
| CYP26B1  | -4,58434 | 3,66E-10 |
| ABCC9    | -4,5883  | 5,61E-06 |
| SNX7     | -4,60947 | 1,13E-42 |
| HDX      | -4,64724 | 1,95E-08 |
| SAMD9L   | -4,64859 | 0,000215 |
| ARMCX2   | -4,6608  | 1,52E-30 |
| LETM2    | -4,66313 | 5,82E-22 |
| WIPF1    | -4,67487 | 1,30E-43 |
| ZNF365   | -4,69329 | 5,43E-09 |
| ZNF513   | -4,69425 | 3,14E-16 |
| MICAL2   | -4,70688 | 3,64E-72 |
| PROS1    | -4,71472 | 8,86E-11 |
| GNB3     | -4,72801 | 0,00089  |
| LCAT     | -4,73643 | 0,000151 |
| ASPH     | -4,7532  | 3,97E-70 |
| TSPAN10  | -4,77092 | 6,31E-15 |
| VASN     | -4,77361 | 1,31E-21 |
| PCDHGC5  | -4,77636 | 1,85E-08 |
| TRIM9    | -4,7779  | 5,24E-08 |
| PTPN22   | -4,78185 | 7,41E-11 |
| CAV1     | -4,79642 | 6,41E-62 |
| DSE      | -4,7983  | 6,47E-70 |
| CAMK4    | -4,80963 | 3,01E-14 |

|           |          |           |
|-----------|----------|-----------|
| PRRT3-AS1 | -4,81588 | 0,000487  |
| DUSP10    | -4,81635 | 1,08E-25  |
| KIAA1614  | -4,81764 | 0,000443  |
| ABLIM3    | -4,81807 | 5,79E-37  |
| PXK       | -4,8213  | 1,47E-26  |
| HOXB6     | -4,83413 | 5,17E-10  |
| SOX30     | -4,84387 | 0,000824  |
| DOCK10    | -4,84912 | 2,42E-36  |
| SH3RF3    | -4,85431 | 7,61E-07  |
| S100A2    | -4,8559  | 6,86E-13  |
| LOXL1     | -4,87333 | 4,40E-71  |
| UGT8      | -4,88373 | 6,19E-05  |
| ADAMTS15  | -4,88848 | 1,03E-23  |
| MCAM      | -4,89488 | 4,60E-36  |
| HLA-B     | -4,89575 | 5,75E-27  |
| NAP1L5    | -4,89738 | 8,52E-06  |
| C1R       | -4,90316 | 4,88E-26  |
| YOD1      | -4,9058  | 1,06E-18  |
| SELM      | -4,91552 | 4,68E-89  |
| ZNF284    | -4,92084 | 3,24E-05  |
| THBS1     | -4,92542 | 1,24E-42  |
| XKR6      | -4,93088 | 1,91E-06  |
| FAM46A    | -4,9347  | 1,80E-53  |
| PRR5L     | -4,9361  | 3,64E-50  |
| MLLT11    | -4,94826 | 7,55E-40  |
| ELFN1     | -4,96944 | 1,36E-38  |
| WLS       | -4,99401 | 8,15E-64  |
| LINC00673 | -5,00378 | 3,10E-07  |
| GNAI1     | -5,01362 | 5,67E-51  |
| SP100     | -5,02581 | 0,000276  |
| CORO2B    | -5,02685 | 5,98E-11  |
| EPB41L2   | -5,04989 | 1,57E-100 |
| GPR176    | -5,05299 | 1,08E-34  |
| ZDHHC2    | -5,05872 | 2,46E-20  |
| SYNE1     | -5,06384 | 1,70E-31  |
| SIRPA     | -5,0767  | 1,80E-108 |
| EDIL3     | -5,08344 | 8,82E-17  |
| CDKN1C    | -5,10359 | 0,000981  |
| ANGPTL4   | -5,10505 | 8,25E-21  |
| TPST1     | -5,10702 | 5,36E-88  |
| PGF       | -5,14161 | 2,60E-15  |
| MCOLN3    | -5,1719  | 2,17E-06  |
| NKX3-2    | -5,17576 | 2,95E-12  |
| SYTL3     | -5,19074 | 4,85E-39  |
| ST3GAL2   | -5,2062  | 2,13E-55  |
| KIF7      | -5,21619 | 0,000243  |
| GNG2      | -5,21754 | 1,38E-06  |
| EEPD1     | -5,22012 | 8,38E-30  |
| ULBP2     | -5,22019 | 3,91E-15  |
| RIN1      | -5,22045 | 8,31E-38  |

|          |          |           |
|----------|----------|-----------|
| PCSK5    | -5,22414 | 0,000113  |
| RNASEH2B | -5,22915 | 0,000145  |
| SPRED1   | -5,22946 | 1,61E-41  |
| NEK10    | -5,24067 | 7,90E-05  |
| DNM3     | -5,24117 | 1,55E-10  |
| IRAK2    | -5,24288 | 1,10E-06  |
| FHL2     | -5,2435  | 9,95E-20  |
| ZC3H12C  | -5,24755 | 8,98E-28  |
| PLCE1    | -5,25187 | 2,00E-17  |
| PSMB9    | -5,25622 | 1,99E-30  |
| MN1      | -5,25623 | 1,90E-08  |
| IL15     | -5,25794 | 0,00044   |
| MRVI1    | -5,25805 | 5,36E-06  |
| SPRY4    | -5,26824 | 4,30E-32  |
| PMP22    | -5,27766 | 1,46E-37  |
| TRO      | -5,28248 | 3,59E-06  |
| LYN      | -5,28681 | 1,41E-34  |
| C3orf52  | -5,29382 | 6,33E-15  |
| COL16A1  | -5,29428 | 8,34E-32  |
| FXD5     | -5,2951  | 5,81E-108 |
| HCP5     | -5,31298 | 5,88E-09  |
| NTNG1    | -5,31311 | 5,09E-05  |
| EGFR     | -5,3154  | 5,48E-83  |
| TRABD2A  | -5,32098 | 7,56E-09  |
| ANKRD33B | -5,32506 | 8,59E-16  |
| DSEL     | -5,34848 | 4,85E-39  |
| CAPN2    | -5,35547 | 2,99E-37  |
| APOL3    | -5,36835 | 3,38E-05  |
| COL5A2   | -5,37812 | 2,33E-99  |
| SLC1A3   | -5,38516 | 2,07E-79  |
| STEAP2   | -5,42249 | 5,14E-07  |
| SPTLC3   | -5,43443 | 1,75E-17  |
| GRASP    | -5,44644 | 0,000153  |
| SMARCA1  | -5,44737 | 5,64E-52  |
| PIK3CD   | -5,45822 | 2,72E-36  |
| CTSS     | -5,46936 | 6,96E-07  |
| CD274    | -5,47644 | 7,17E-07  |
| CHN2     | -5,47803 | 2,20E-07  |
| EVA1A    | -5,48421 | 3,73E-24  |
| CRYBG3   | -5,48819 | 3,98E-35  |
| VIM-AS1  | -5,5211  | 8,88E-74  |
| RFTN1    | -5,52427 | 4,30E-63  |
| WNT5B    | -5,52458 | 3,70E-40  |
| LIX1L    | -5,53403 | 1,25E-68  |
| LAMC2    | -5,53631 | 5,27E-65  |
| POPDC3   | -5,5481  | 2,10E-15  |
| BAIAP2L2 | -5,57297 | 6,64E-08  |
| ARHGEF40 | -5,57486 | 3,01E-31  |
| PTGFR    | -5,59798 | 0,000159  |
| TGM2     | -5,60552 | 2,49E-24  |

|                   |          |           |
|-------------------|----------|-----------|
| IL21R             | -5,60556 | 2,65E-24  |
| ANGPT1            | -5,61289 | 7,90E-27  |
| TM4SF1            | -5,62071 | 4,31E-73  |
| ZNF528            | -5,62437 | 2,00E-13  |
| CD109             | -5,63872 | 1,20E-55  |
| ME3               | -5,65962 | 2,17E-15  |
| SHISA2            | -5,67418 | 2,08E-71  |
| COL6A2            | -5,6894  | 3,68E-128 |
| MTAP              | -5,7036  | 1,34E-29  |
| EGFLAM            | -5,71655 | 6,53E-29  |
| PDZRN3            | -5,71904 | 6,49E-118 |
| SERPINE2          | -5,72005 | 1,09E-100 |
| CALD1             | -5,72025 | 1,13E-31  |
| FPR1              | -5,72498 | 1,31E-07  |
| LOX               | -5,73454 | 2,62E-88  |
| RBMS3             | -5,75336 | 3,87E-17  |
| PNPLA3            | -5,76167 | 3,53E-06  |
| ENPP1             | -5,77104 | 6,67E-45  |
| LOC79160          | -5,77412 | 0,00037   |
| APOL6             | -5,80119 | 2,00E-44  |
| HAS2              | -5,80453 | 2,43E-07  |
| DRAXIN            | -5,80835 | 9,47E-06  |
| C1QTNF2           | -5,80836 | 2,93E-13  |
| HTR7              | -5,81065 | 5,42E-25  |
| LAPTM5            | -5,81286 | 2,77E-06  |
| GLIPR1            | -5,81445 | 1,80E-41  |
| ARHGAP23          | -5,83787 | 1,34E-44  |
| APCDD1L- <i>A</i> | -5,84021 | 0,00021   |
| MAF               | -5,84186 | 8,50E-50  |
| VEGFC             | -5,85169 | 4,91E-32  |
| B3GNT9            | -5,85201 | 3,34E-26  |
| ARHGAP22          | -5,85416 | 3,72E-13  |
| SLC7A7            | -5,85457 | 7,43E-06  |
| NFASC             | -5,86013 | 4,18E-10  |
| C10orf10          | -5,86733 | 0,000182  |
| PYGL              | -5,88987 | 4,53E-06  |
| SEC16B            | -5,89772 | 1,33E-05  |
| RAB32             | -5,90382 | 1,51E-51  |
| IGF2BP1           | -5,91253 | 2,47E-35  |
| CD68              | -5,94497 | 7,74E-39  |
| TUBA4A            | -5,98675 | 3,03E-30  |
| TP73-AS1          | -5,99693 | 1,29E-10  |
| LOC101927         | -6,001   | 1,78E-17  |
| LOXL2             | -6,00256 | 2,20E-28  |
| TMEM45A           | -6,01648 | 9,51E-34  |
| SCARF2            | -6,0499  | 1,36E-103 |
| NLRC5             | -6,05032 | 1,36E-34  |
| HOXA2             | -6,05785 | 2,09E-13  |
| SYNC              | -6,06042 | 1,17E-67  |
| DACT1             | -6,06401 | 5,24E-22  |



|          |          |           |
|----------|----------|-----------|
| MAP1A    | -6,06771 | 3,65E-36  |
| KLHL4    | -6,07588 | 4,95E-05  |
| ADAMTS6  | -6,0812  | 0,000105  |
| RCN3     | -6,09623 | 9,36E-56  |
| AOX1     | -6,13341 | 9,50E-06  |
| FHL1     | -6,14218 | 1,16E-79  |
| GAS1     | -6,14825 | 2,52E-19  |
| MCTP2    | -6,15525 | 4,82E-16  |
| SNPH     | -6,15785 | 6,49E-07  |
| PLA2G4A  | -6,16101 | 8,44E-05  |
| PLCL2    | -6,16533 | 2,20E-11  |
| RIN2     | -6,18639 | 4,89E-72  |
| ACAN     | -6,20956 | 2,04E-05  |
| PHACTR1  | -6,23358 | 2,25E-05  |
| C1S      | -6,24673 | 2,83E-14  |
| DNM3OS   | -6,24868 | 2,93E-07  |
| ADAM19   | -6,27079 | 6,52E-142 |
| ECM1     | -6,27968 | 4,98E-31  |
| ZNF469   | -6,31945 | 2,87E-42  |
| MYLK     | -6,32017 | 1,02E-135 |
| PLEKHG4B | -6,32998 | 1,80E-51  |
| CSF1     | -6,33165 | 2,25E-85  |
| SLC4A4   | -6,3371  | 6,21E-11  |
| GEM      | -6,34737 | 5,08E-89  |
| EMILIN2  | -6,36931 | 2,39E-46  |
| HLA-H    | -6,39662 | 5,49E-06  |
| TMEM200E | -6,40084 | 2,62E-13  |
| FENDRR   | -6,44181 | 1,33E-13  |
| MRC2     | -6,45537 | 1,56E-55  |
| FOSL1    | -6,47656 | 3,43E-64  |
| COL7A1   | -6,50659 | 1,43E-39  |
| SOGA3    | -6,51368 | 5,70E-12  |
| CUX2     | -6,5221  | 2,98E-06  |
| C1RL     | -6,52601 | 1,72E-10  |
| GRIK2    | -6,53113 | 2,81E-06  |
| CTHRC1   | -6,55624 | 1,14E-69  |
| PRRX2    | -6,57181 | 4,29E-37  |
| LMO7-AS1 | -6,57331 | 2,84E-15  |
| BEAN1    | -6,57441 | 0,000733  |
| CSF1R    | -6,57523 | 1,06E-10  |
| GABRQ    | -6,58273 | 1,19E-11  |
| PLAUR    | -6,5891  | 4,63E-50  |
| C11orf70 | -6,5988  | 0,000657  |
| NRROS    | -6,60863 | 4,76E-12  |
| P2RY1    | -6,61232 | 1,61E-06  |
| DOCK2    | -6,61403 | 6,60E-09  |
| ROBO1    | -6,62579 | 3,86E-68  |
| ADM      | -6,63322 | 1,10E-48  |
| FLJ22447 | -6,63344 | 2,10E-27  |
| DPP4     | -6,63643 | 1,87E-17  |

|           |          |           |
|-----------|----------|-----------|
| LINC00862 | -6,64979 | 3,37E-25  |
| CYS1      | -6,66726 | 0,000681  |
| GJA1      | -6,69949 | 8,53E-13  |
| CDH2      | -6,70258 | 2,80E-50  |
| ANTXR2    | -6,70861 | 2,77E-27  |
| SLIT3     | -6,73095 | 1,28E-11  |
| BICC1     | -6,75315 | 1,50E-56  |
| SPOCD1    | -6,78642 | 4,00E-05  |
| ACOT2     | -6,79218 | 2,57E-29  |
| ZNF426    | -6,79293 | 2,07E-13  |
| NLRP1     | -6,79478 | 0,000387  |
| CRYGS     | -6,79508 | 3,01E-14  |
| SVEP1     | -6,79719 | 1,20E-17  |
| SH3PXD2A  | -6,80971 | 4,76E-120 |
| HAPLN3    | -6,83208 | 5,75E-16  |
| BEX1      | -6,83778 | 0,000279  |
| ROR2      | -6,87068 | 4,43E-24  |
| PRKCA     | -6,88573 | 1,16E-170 |
| CGB5      | -6,88718 | 0,000222  |
| TGFB111   | -6,89036 | 2,44E-06  |
| MID1      | -6,89723 | 2,64E-72  |
| PTGS2     | -6,90154 | 2,10E-11  |
| FBXO32    | -6,90842 | 2,49E-63  |
| TNFRSF11B | -6,92891 | 4,07E-125 |
| LINC00857 | -6,95448 | 1,34E-07  |
| TDO2      | -6,96113 | 0,00017   |
| INPP1     | -6,99545 | 5,57E-07  |
| ZNF717    | -6,99946 | 1,27E-07  |
| LOC101928 | -7,014   | 2,78E-19  |
| DKK3      | -7,0309  | 4,22E-94  |
| NEK9      | -7,05967 | 2,84E-05  |
| TMBIM1    | -7,06794 | 4,43E-45  |
| HOXD11    | -7,06841 | 7,45E-28  |
| KIFC3     | -7,06918 | 6,19E-50  |
| ITGA5     | -7,07486 | 1,07E-232 |
| SPANXB1   | -7,09995 | 0,000102  |
| COL5A1    | -7,111   | 2,34E-86  |
| IL11      | -7,13434 | 4,61E-43  |
| OLFML2B   | -7,13886 | 3,26E-40  |
| BDNF      | -7,14259 | 9,21E-48  |
| ETV5      | -7,14888 | 2,62E-88  |
| EPAS1     | -7,15406 | 3,05E-86  |
| LINC01605 | -7,16723 | 7,77E-47  |
| C1QTNF1   | -7,16929 | 1,59E-19  |
| TNFAIP2   | -7,16999 | 7,60E-54  |
| MPP1      | -7,17991 | 3,11E-60  |
| ABHD8     | -7,18051 | 2,29E-61  |
| BIN1      | -7,18395 | 1,30E-97  |
| ST6GAL2   | -7,1907  | 2,74E-19  |
| ZBTB18    | -7,20582 | 6,82E-49  |

|           |          |           |
|-----------|----------|-----------|
| PAPPA2    | -7,21227 | 6,66E-05  |
| TMTC1     | -7,22537 | 1,21E-11  |
| TBX15     | -7,23373 | 3,40E-37  |
| ZNF521    | -7,25236 | 3,07E-15  |
| PLXDC1    | -7,25889 | 6,44E-05  |
| FMN2      | -7,31118 | 4,31E-20  |
| ALDH2     | -7,31425 | 1,24E-61  |
| DNER      | -7,31682 | 3,31E-12  |
| BRINP1    | -7,33328 | 9,11E-09  |
| ENPP2     | -7,3371  | 9,82E-19  |
| TMEM173   | -7,33785 | 6,58E-05  |
| DAB2      | -7,34277 | 3,47E-40  |
| MILR1     | -7,35876 | 4,01E-05  |
| GSTP1     | -7,37214 | 4,75E-58  |
| DPYSL3    | -7,38107 | 1,38E-148 |
| GIPC2     | -7,38795 | 0,000997  |
| ZEB1      | -7,39875 | 1,50E-49  |
| NALCN     | -7,40245 | 0,000943  |
| HEG1      | -7,40948 | 7,98E-07  |
| ADRA1D    | -7,41557 | 2,61E-05  |
| MIR221    | -7,41638 | 0,000817  |
| PRSS12    | -7,4168  | 6,49E-13  |
| BMPER     | -7,42087 | 0,000814  |
| ZBTB20    | -7,42134 | 1,46E-36  |
| SV2A      | -7,43046 | 3,47E-79  |
| RRAD      | -7,43771 | 0,000811  |
| KCNJ12    | -7,44866 | 0,000757  |
| ANXA1     | -7,44953 | 1,56E-246 |
| ADAMTS10  | -7,45305 | 0,000691  |
| MUC13     | -7,45609 | 0,00068   |
| TNIP3     | -7,46121 | 2,50E-09  |
| JAZF1     | -7,47226 | 6,17E-66  |
| PLSCR4    | -7,47436 | 2,04E-05  |
| FGF2      | -7,47633 | 3,29E-16  |
| UCN2      | -7,47946 | 2,75E-05  |
| LINC01291 | -7,48452 | 0,000608  |
| ZNF69     | -7,48582 | 0,000662  |
| PPP1R3C   | -7,49029 | 2,75E-09  |
| ZNF788    | -7,49066 | 2,56E-13  |
| PPP1R3G   | -7,49407 | 2,25E-05  |
| GCNT2     | -7,50485 | 7,05E-13  |
| MICU3     | -7,50653 | 0,000554  |
| PWAR5     | -7,5124  | 0,000552  |
| LOC101927 | -7,52003 | 0,000823  |
| FLJ31356  | -7,52657 | 0,000599  |
| COL5A3    | -7,53111 | 0,000501  |
| VCAN      | -7,53707 | 1,66E-67  |
| LURAP1L-A | -7,54304 | 1,89E-05  |
| CYP27C1   | -7,54728 | 0,000811  |
| ZNF660    | -7,54958 | 0,00046   |

|           |          |          |
|-----------|----------|----------|
| CDA       | -7,55693 | 0,000589 |
| HLX       | -7,56282 | 1,04E-09 |
| ZSCAN23   | -7,57224 | 0,000492 |
| ABCA13    | -7,59415 | 0,00038  |
| CSRP3     | -7,60405 | 0,000507 |
| LINC00693 | -7,60791 | 0,000383 |
| GAPLINC   | -7,60911 | 0,000362 |
| LINC00622 | -7,61944 | 6,22E-10 |
| LINC01204 | -7,62001 | 0,000342 |
| LYNX1     | -7,62158 | 0,000433 |
| SELPLG    | -7,6258  | 7,48E-19 |
| IL10      | -7,63044 | 0,000422 |
| ROS1      | -7,63083 | 0,000351 |
| TMEM236   | -7,63315 | 0,000397 |
| DCN       | -7,63521 | 0,000549 |
| BAALC     | -7,63892 | 0,000376 |
| ECM2      | -7,63892 | 0,000376 |
| LOC100128 | -7,64391 | 0,000329 |
| FLJ32255  | -7,65448 | 8,90E-22 |
| SEMA5A    | -7,65455 | 0,000294 |
| ARHGAP20  | -7,65605 | 0,000329 |
| ITK       | -7,66733 | 0,000395 |
| KCNT2     | -7,67299 | 0,000292 |
| ABI3BP    | -7,67299 | 0,000292 |
| GCNT4     | -7,67823 | 0,000304 |
| FOXQ1     | -7,67976 | 5,23E-22 |
| HS3ST2    | -7,69233 | 0,000265 |
| PRDM8     | -7,69233 | 0,000265 |
| FAM225B   | -7,69455 | 0,000307 |
| NOX4      | -7,69491 | 0,000269 |
| DHRS9     | -7,69604 | 0,000244 |
| LOC101925 | -7,7093  | 0,00055  |
| LINC01138 | -7,71013 | 2,81E-10 |
| JPH2      | -7,71673 | 7,48E-06 |
| CLIP4     | -7,72071 | 5,19E-23 |
| LINC00942 | -7,72092 | 7,67E-06 |
| CPNE5     | -7,72477 | 0,000329 |
| ZNF625-ZN | -7,72732 | 0,000307 |
| PAQR9     | -7,74992 | 0,000197 |
| C7orf57   | -7,74992 | 0,000197 |
| TFCP2     | -7,75602 | 0,000325 |
| ACTC1     | -7,76007 | 0,000581 |
| CARD16    | -7,76334 | 0,000197 |
| HEPH      | -7,76432 | 0,000272 |
| KLHL38    | -7,76616 | 0,000232 |
| IL7       | -7,77908 | 0,000192 |
| COL4A2-AS | -7,78491 | 0,000239 |
| CFI       | -7,79552 | 0,000283 |
| GABRA3    | -7,79832 | 0,000875 |
| MT1L      | -7,80602 | 0,000349 |

|           |          |           |
|-----------|----------|-----------|
| LINC00460 | -7,82324 | 0,00014   |
| HRCT1     | -7,82324 | 0,00014   |
| PADI1     | -7,83233 | 0,000157  |
| PDGFD     | -7,83834 | 0,000129  |
| MME       | -7,8439  | 4,27E-06  |
| C10orf90  | -7,84785 | 4,00E-06  |
| LRCH2     | -7,84867 | 0,000123  |
| SLFN13    | -7,85098 | 0,000121  |
| NRP2      | -7,85586 | 2,41E-108 |
| KCNJ2     | -7,86447 | 0,000147  |
| HHIP-AS1  | -7,8648  | 0,00012   |
| AIM2      | -7,86541 | 0,000279  |
| BHLHE41   | -7,86806 | 3,91E-06  |
| VGLL2     | -7,86938 | 0,000123  |
| DOK5      | -7,87265 | 0,000109  |
| RNF217    | -7,874   | 1,66E-15  |
| KLHL3     | -7,87684 | 0,000157  |
| HOXB3     | -7,87946 | 1,67E-15  |
| ADTRP     | -7,88141 | 0,000138  |
| LOC101928 | -7,884   | 0,000111  |
| HCRTR2    | -7,90296 | 0,000103  |
| TICAM2    | -7,90839 | 9,22E-05  |
| ARHGAP31  | -7,91725 | 9,25E-05  |
| APCDD1L   | -7,91857 | 0,000125  |
| BTBD19    | -7,92574 | 9,47E-06  |
| TSLP      | -7,92922 | 8,42E-05  |
| COL12A1   | -7,94168 | 1,97E-65  |
| CD70      | -7,94306 | 4,93E-11  |
| MMP1      | -7,94725 | 0,00011   |
| APOBEC3C  | -7,94797 | 1,01E-34  |
| HSPB3     | -7,96239 | 7,74E-05  |
| CXCL5     | -7,96832 | 0,000143  |
| LINC01239 | -7,97342 | 0,000104  |
| PID1      | -7,97563 | 1,89E-16  |
| GPR85     | -7,97676 | 3,04E-06  |
| FBN1      | -7,97736 | 6,91E-159 |
| DGKG      | -7,97817 | 2,96E-11  |
| TMEM100   | -7,98193 | 0,000148  |
| OSBPL3    | -7,98402 | 5,20E-56  |
| APBA2     | -7,98438 | 0,000642  |
| TMEM26    | -7,99418 | 7,13E-05  |
| LOC101060 | -7,99628 | 7,33E-05  |
| AGTR1     | -8,00482 | 3,73E-06  |
| CCBE1     | -8,02678 | 3,56E-25  |
| ZNF625    | -8,02911 | 6,23E-05  |
| KRT34     | -8,04069 | 7,99E-05  |
| FOXF1     | -8,04214 | 1,13E-05  |
| LOC152225 | -8,04284 | 0,000142  |
| DMD       | -8,04347 | 8,23E-05  |
| NPR2      | -8,04431 | 1,65E-06  |

|           |          |           |
|-----------|----------|-----------|
| SMO       | -8,04479 | 1,84E-16  |
| FOXC2     | -8,04536 | 1,61E-06  |
| CAND2     | -8,04763 | 1,65E-06  |
| C15orf52  | -8,06515 | 2,40E-06  |
| ADAMTS14  | -8,07758 | 1,80E-06  |
| LOC101927 | -8,0915  | 3,81E-05  |
| TRIM38    | -8,10926 | 8,69E-05  |
| SCUBE1    | -8,1118  | 3,54E-05  |
| LINC00944 | -8,11565 | 3,61E-05  |
| FAM155A   | -8,1165  | 3,37E-05  |
| RGCC      | -8,1201  | 9,23E-84  |
| GNG11     | -8,12319 | 7,66E-12  |
| PDE3A     | -8,15987 | 2,87E-05  |
| PDZRN3-AS | -8,15987 | 2,87E-05  |
| CACNA1A   | -8,16409 | 4,12E-05  |
| CHI3L1    | -8,16441 | 2,65E-05  |
| HDAC9     | -8,16463 | 1,21E-38  |
| ZNF582    | -8,16971 | 3,46E-05  |
| LINC00702 | -8,16998 | 2,63E-05  |
| C11orf45  | -8,19002 | 2,35E-05  |
| PTX3      | -8,20124 | 6,39E-06  |
| USP44     | -8,20718 | 2,15E-05  |
| LOC102467 | -8,22235 | 1,99E-05  |
| LRRC17    | -8,22693 | 1,33E-32  |
| CTB-113P1 | -8,23281 | 2,22E-05  |
| RAB38     | -8,23459 | 2,14E-05  |
| LHX8      | -8,23587 | 4,58E-05  |
| GCNT3     | -8,23659 | 2,09E-05  |
| DUSP5P1   | -8,23814 | 1,99E-05  |
| CRYBA2    | -8,23991 | 1,93E-05  |
| CXCL2     | -8,24127 | 3,61E-05  |
| RAB7B     | -8,24898 | 7,00E-07  |
| CST7      | -8,25077 | 2,67E-05  |
| APOBEC3G  | -8,29324 | 1,49E-05  |
| EMILIN1   | -8,29719 | 4,88E-112 |
| HS3ST3A1  | -8,30528 | 5,29E-59  |
| PRDM1     | -8,31137 | 1,37E-12  |
| TNFAIP6   | -8,31427 | 1,26E-05  |
| LAT       | -8,3192  | 1,43E-08  |
| TM4SF19   | -8,32239 | 1,57E-05  |
| ENG       | -8,3389  | 2,53E-149 |
| EPHA5-AS1 | -8,34868 | 2,94E-05  |
| TUBA3FP   | -8,35585 | 1,53E-05  |
| IFFO1     | -8,36636 | 3,39E-17  |
| HHIP      | -8,36683 | 1,30E-05  |
| C20orf197 | -8,36955 | 1,39E-05  |
| C5orf17   | -8,37234 | 1,07E-05  |
| TMEM220   | -8,38268 | 9,72E-06  |
| ZNF501    | -8,38568 | 9,13E-06  |
| LOC101926 | -8,40313 | 8,24E-06  |

|           |          |           |
|-----------|----------|-----------|
| ZNF844    | -8,4146  | 7,08E-07  |
| HACD4     | -8,42486 | 7,16E-06  |
| CHRD1     | -8,42621 | 8,62E-06  |
| CNTN1     | -8,4385  | 2,98E-07  |
| CRYBB1    | -8,45585 | 8,74E-06  |
| LINC01411 | -8,49535 | 1,20E-05  |
| UBA7      | -8,50443 | 5,13E-06  |
| PSORS1C1  | -8,51012 | 4,56E-06  |
| LINC01561 | -8,52117 | 5,19E-06  |
| NLGN1     | -8,52533 | 4,13E-06  |
| LRRN3     | -8,52823 | 4,07E-06  |
| WT1-AS    | -8,54697 | 8,54E-06  |
| CNKSR2    | -8,55221 | 8,38E-06  |
| ZFH4-AS1  | -8,55936 | 3,84E-06  |
| DDO       | -8,56277 | 4,48E-06  |
| ZNF577    | -8,56561 | 8,52E-06  |
| SSC5D     | -8,56777 | 1,87E-40  |
| ZNF667    | -8,56987 | 1,23E-05  |
| SCG5      | -8,57997 | 1,92E-07  |
| SLCO1B3   | -8,58183 | 3,29E-06  |
| AFP       | -8,58862 | 3,02E-06  |
| KLRC2     | -8,58922 | 3,49E-06  |
| RAET1E    | -8,58939 | 3,04E-06  |
| CCDC80    | -8,60065 | 1,35E-150 |
| CYP7B1    | -8,60577 | 2,71E-06  |
| ADRA1B    | -8,60792 | 3,07E-06  |
| LBH       | -8,62224 | 7,43E-14  |
| SLC16A2   | -8,63169 | 3,04E-142 |
| TENM2     | -8,63293 | 0,000509  |
| VSNL1     | -8,63832 | 6,60E-14  |
| ITGA1     | -8,63896 | 1,58E-07  |
| LONRF3    | -8,64216 | 8,20E-14  |
| MEIS2     | -8,64327 | 5,54E-05  |
| FBLN1     | -8,64459 | 2,68E-06  |
| GBP5      | -8,65615 | 1,73E-06  |
| LHFP      | -8,66422 | 1,70E-48  |
| TMEM255/  | -8,66721 | 2,57E-06  |
| SAA1      | -8,68048 | 2,35E-06  |
| TNFSF12   | -8,68531 | 2,18E-06  |
| NETO1     | -8,69052 | 2,44E-06  |
| DOK6      | -8,70485 | 3,86E-06  |
| LPAR4     | -8,70559 | 1,60E-06  |
| LOC72997C | -8,70815 | 1,56E-06  |
| ADGRE1    | -8,70815 | 1,56E-06  |
| ZC3HAV1L  | -8,74207 | 1,47E-06  |
| TMEM200C  | -8,76009 | 2,10E-06  |
| FGF5      | -8,8063  | 1,19E-06  |
| PINLYP    | -8,80978 | 6,13E-06  |
| ITGB3     | -8,81617 | 4,26E-08  |
| PDGFRA    | -8,81648 | 5,41E-21  |

|           |          |           |
|-----------|----------|-----------|
| SULT1C2   | -8,81761 | 1,48E-06  |
| PPARGC1A  | -8,82664 | 8,62E-07  |
| FAM196B   | -8,83215 | 5,71E-08  |
| ZNF671    | -8,85121 | 1,39E-06  |
| ZC4H2     | -8,85393 | 6,33E-15  |
| LPPR4     | -8,85395 | 7,61E-07  |
| C10orf55  | -8,86095 | 1,28E-06  |
| BNC2      | -8,87849 | 2,47E-08  |
| ZNF280B   | -8,89401 | 5,73E-07  |
| ARMCX4    | -8,90446 | 2,04E-08  |
| MAB21L1   | -8,9187  | 5,86E-07  |
| MDFI      | -8,93692 | 9,40E-07  |
| AMPH      | -8,94551 | 5,16E-08  |
| LINC01094 | -8,94713 | 4,95E-07  |
| PHLDB2    | -8,94818 | 1,49E-45  |
| ZNF71     | -8,94938 | 3,38E-15  |
| FAM133A   | -8,96668 | 9,06E-07  |
| SULF1     | -8,9775  | 1,90E-08  |
| ANKRD1    | -8,97884 | 1,90E-08  |
| CD40      | -8,9799  | 3,54E-07  |
| ZKSCAN7   | -8,98036 | 3,95E-07  |
| ZFP28     | -8,98096 | 3,50E-07  |
| CATSPER1  | -8,98564 | 3,52E-07  |
| GBP1      | -8,98568 | 4,69E-13  |
| MAMDC2    | -8,99073 | 4,39E-07  |
| ARHGAP28  | -9,02853 | 2,99E-07  |
| SLC43A3   | -9,03019 | 0,000172  |
| HOXB5     | -9,04163 | 2,63E-07  |
| EMP3      | -9,07238 | 1,70E-74  |
| TNFSF10   | -9,07819 | 1,15E-08  |
| IPW       | -9,089   | 1,98E-07  |
| RUNX1T1   | -9,09167 | 2,55E-07  |
| RGS4      | -9,1035  | 3,84E-07  |
| ATP6V0D2  | -9,1246  | 1,55E-07  |
| ADAMTS5   | -9,12473 | 1,81E-07  |
| COL3A1    | -9,1295  | 1,79E-141 |
| LINC00601 | -9,13337 | 2,25E-07  |
| CFH       | -9,17538 | 4,44E-15  |
| PTPRR     | -9,22608 | 1,21E-07  |
| LOC100375 | -9,23952 | 8,11E-08  |
| BVES      | -9,26158 | 9,11E-08  |
| ARSJ      | -9,27403 | 1,50E-23  |
| CDO1      | -9,28823 | 6,11E-08  |
| RGS20     | -9,28896 | 7,70E-08  |
| PDCD1LG2  | -9,30511 | 5,51E-08  |
| MDFIC     | -9,30664 | 4,39E-22  |
| ZNF528-AS | -9,31471 | 1,20E-07  |
| MIR646HG  | -9,31857 | 1,51E-07  |
| SLC2A5    | -9,32622 | 5,56E-08  |
| ANXA8L1   | -9,34467 | 5,14E-08  |



|           |          |           |
|-----------|----------|-----------|
| NDN       | -9,35006 | 4,26E-08  |
| LOC100507 | -9,35026 | 6,29E-08  |
| SLA       | -9,35124 | 4,38E-08  |
| GJC1      | -9,35172 | 1,01E-31  |
| PDLIM4    | -9,35836 | 6,79E-125 |
| FOXL2NB   | -9,35857 | 4,07E-08  |
| SGCD      | -9,35857 | 4,07E-08  |
| EDNRA     | -9,37165 | 5,11E-08  |
| ZNF503-AS | -9,37662 | 3,66E-08  |
| RUNX3     | -9,38388 | 1,76E-31  |
| ZNF667-AS | -9,38932 | 3,40E-08  |
| MPP4      | -9,39047 | 3,45E-08  |
| CACNA1C   | -9,40322 | 2,27E-09  |
| TNC       | -9,42416 | 3,02E-56  |
| SLC9A9    | -9,42487 | 2,85E-08  |
| C3AR1     | -9,42866 | 2,74E-08  |
| WFDC21P   | -9,44244 | 3,82E-17  |
| EMP1      | -9,44999 | 2,24E-17  |
| LUM       | -9,45173 | 8,57E-17  |
| HOXD-AS2  | -9,45392 | 2,60E-08  |
| ZFPM2-AS1 | -9,46802 | 2,55E-08  |
| PAPPA     | -9,47417 | 3,80E-08  |
| HOXD10    | -9,48904 | 1,86E-17  |
| RFX8      | -9,48915 | 1,17E-07  |
| LOC102477 | -9,49188 | 1,88E-08  |
| GPX7      | -9,49693 | 3,15E-08  |
| FGF1      | -9,512   | 1,69E-08  |
| IL31RA    | -9,52076 | 1,84E-08  |
| ILDR2     | -9,52153 | 5,59E-55  |
| OSR1      | -9,54387 | 1,14E-09  |
| ALX4      | -9,54888 | 1,35E-08  |
| SLITRK3   | -9,57726 | 1,15E-08  |
| SDHAF3    | -9,62158 | 1,00E-08  |
| NGF       | -9,62629 | 1,46E-08  |
| GALNT13   | -9,63663 | 9,38E-09  |
| EVI2B     | -9,64026 | 9,62E-09  |
| DKK2      | -9,64504 | 1,45E-08  |
| GLIS3     | -9,65169 | 1,19E-07  |
| NTF3      | -9,65285 | 8,42E-09  |
| GPC6      | -9,65625 | 1,71E-26  |
| MAB21L2   | -9,65758 | 7,45E-09  |
| ZNF470    | -9,66013 | 1,30E-08  |
| PSMB8     | -9,69702 | 1,15E-34  |
| AGMO      | -9,69862 | 5,70E-09  |
| CASP1     | -9,70018 | 5,76E-09  |
| ADAMTS16  | -9,70083 | 5,70E-09  |
| ZCCHC5    | -9,71162 | 5,34E-09  |
| ZNF229    | -9,7167  | 5,17E-09  |
| EPSTI1    | -9,7175  | 1,79E-18  |
| FLI1      | -9,71799 | 5,83E-10  |

|           |          |           |
|-----------|----------|-----------|
| FN1       | -9,74477 | 1,08E-195 |
| PDE1C     | -9,7486  | 5,48E-09  |
| SERPINB7  | -9,75142 | 5,08E-09  |
| TOX       | -9,77003 | 5,17E-09  |
| SNCA      | -9,8097  | 3,00E-09  |
| CLMP      | -9,81177 | 9,13E-35  |
| TLR6      | -9,82805 | 3,16E-09  |
| NTM       | -9,84028 | 2,72E-09  |
| COL8A1    | -9,8542  | 5,10E-19  |
| MAP1LC3A  | -9,8681  | 2,13E-09  |
| GIPC3     | -9,88233 | 2,28E-09  |
| ANKRD30B  | -9,88631 | 2,53E-09  |
| SERPINE1  | -9,91486 | 3,01E-11  |
| FOXL1     | -9,91506 | 1,75E-09  |
| PTPRN     | -9,92118 | 2,13E-10  |
| ZFPM2     | -9,92547 | 1,71E-09  |
| ADAMTS3   | -9,92554 | 1,82E-09  |
| DGKI      | -9,92982 | 2,08E-09  |
| SCG2      | -9,9308  | 1,47E-09  |
| LAMA4     | -9,95567 | 1,76E-09  |
| GDF6      | -9,95995 | 1,55E-10  |
| HOXD13    | -9,96317 | 1,50E-09  |
| LPAR3     | -9,97018 | 1,16E-09  |
| MIR31HG   | -9,97496 | 1,14E-09  |
| ZNF662    | -9,98712 | 1,35E-09  |
| ZNF626    | -10,0259 | 8,34E-10  |
| ZMIZ1-AS1 | -10,0329 | 9,71E-10  |
| LINC00941 | -10,0373 | 1,34E-09  |
| BARX1     | -10,0607 | 7,51E-10  |
| AGPS      | -10,0694 | 2,80E-59  |
| ETV1      | -10,0847 | 6,61E-11  |
| GSPT2     | -10,0852 | 8,05E-10  |
| CDKN2A    | -10,0855 | 5,60E-20  |
| TMEM200/  | -10,0936 | 7,07E-10  |
| NEXN      | -10,1082 | 2,40E-29  |
| LHFPL4    | -10,1523 | 5,29E-10  |
| ZNF804A   | -10,1554 | 7,11E-10  |
| NEGR1     | -10,1607 | 3,87E-10  |
| AFAP1L1   | -10,1608 | 1,95E-20  |
| KCNJ15    | -10,1651 | 3,74E-10  |
| CCDC152   | -10,1763 | 4,00E-10  |
| TMEM108   | -10,1775 | 3,57E-10  |
| SYT14     | -10,179  | 6,62E-10  |
| CSPG4     | -10,1813 | 1,20E-07  |
| MIR100HG  | -10,1815 | 5,56E-11  |
| ZNF300P1  | -10,1841 | 3,76E-10  |
| BDKRB1    | -10,1847 | 4,11E-10  |
| ZNF132    | -10,1909 | 3,21E-10  |
| LDHB      | -10,1964 | 0,000484  |
| CDH13     | -10,1987 | 3,82E-10  |

|           |          |           |
|-----------|----------|-----------|
| ZNF502    | -10,2002 | 3,08E-10  |
| NEFL      | -10,2023 | 3,36E-10  |
| NID2      | -10,2088 | 3,68E-10  |
| HOXD9     | -10,2147 | 7,90E-10  |
| TWIST1    | -10,218  | 4,29E-30  |
| P3H3      | -10,2184 | 8,58E-11  |
| S1PR1     | -10,2209 | 4,74E-10  |
| ZNF320    | -10,2257 | 4,11E-10  |
| PSG5      | -10,2405 | 2,46E-10  |
| IGFN1     | -10,2454 | 6,84E-10  |
| FAM26E    | -10,2579 | 2,37E-10  |
| DEPDC7    | -10,2736 | 1,95E-10  |
| CREB3L1   | -10,2958 | 2,11E-129 |
| FNDC1     | -10,3104 | 1,13E-09  |
| ZNF559    | -10,3139 | 1,56E-10  |
| MKRN3     | -10,3311 | 1,42E-10  |
| SLFN12    | -10,3382 | 1,40E-10  |
| TPM2      | -10,3608 | 5,45E-227 |
| ARSE      | -10,4006 | 1,20E-10  |
| PKIA      | -10,416  | 9,48E-11  |
| STK33     | -10,4248 | 1,10E-10  |
| ZNF175    | -10,4385 | 1,24E-10  |
| CPA4      | -10,4446 | 1,84E-31  |
| AKR1B1    | -10,4465 | 1,79E-59  |
| ZNF583    | -10,4582 | 8,88E-11  |
| LY96      | -10,4633 | 6,89E-11  |
| GPR183    | -10,4814 | 5,88E-11  |
| PDPN      | -10,4855 | 5,96E-11  |
| LINC00565 | -10,4887 | 5,46E-11  |
| PLAT      | -10,4973 | 8,16E-11  |
| ZNF773    | -10,5363 | 4,14E-11  |
| BCHE      | -10,5638 | 3,50E-11  |
| GLT8D2    | -10,5901 | 3,80E-11  |
| SALL1     | -10,6047 | 3,08E-11  |
| ZNF649    | -10,6067 | 4,61E-11  |
| CTS2      | -10,6076 | 5,17E-133 |
| LDB2      | -10,6104 | 4,14E-11  |
| LRRC4     | -10,6337 | 2,35E-11  |
| LINC01279 | -10,6437 | 2,74E-11  |
| ADAMTS2   | -10,6595 | 9,86E-23  |
| CA13      | -10,6953 | 1,84E-11  |
| GBP3      | -10,7233 | 2,28E-12  |
| PTN       | -10,7256 | 1,84E-11  |
| ZNF506    | -10,7352 | 2,52E-11  |
| DMRTA2    | -10,7516 | 1,89E-12  |
| CARD6     | -10,7584 | 1,29E-11  |
| MOXD1     | -10,7597 | 1,26E-11  |
| SPAG16    | -10,7732 | 1,01E-11  |
| ZFP82     | -10,7748 | 1,25E-11  |
| COL4A2    | -10,8125 | 9,47E-130 |

|           |          |           |
|-----------|----------|-----------|
| ADAM12    | -10,8429 | 9,49E-65  |
| STK32B    | -10,857  | 6,11E-12  |
| AASS      | -10,8859 | 5,16E-12  |
| FIGN      | -10,8971 | 5,40E-12  |
| TWIST2    | -10,9094 | 4,48E-12  |
| SIGLEC15  | -10,93   | 4,03E-12  |
| EVI2A     | -10,9312 | 4,05E-12  |
| LINC01444 | -10,9362 | 3,83E-12  |
| TNFRSF1B  | -10,9369 | 3,83E-12  |
| SP140     | -10,9786 | 3,82E-12  |
| CLEC2B    | -10,9795 | 3,99E-12  |
| KCNE4     | -10,99   | 4,44E-12  |
| POSTN     | -10,991  | 3,89E-12  |
| FSTL1     | -10,9948 | 2,43E-166 |
| DLX6      | -10,9951 | 2,95E-12  |
| FRG1CP    | -11,011  | 2,45E-12  |
| AGT       | -11,0151 | 2,90E-12  |
| CDIP1     | -11,0165 | 2,83E-12  |
| CHST2     | -11,0791 | 1,75E-12  |
| ITGBL1    | -11,1165 | 1,42E-12  |
| ZNF542P   | -11,1306 | 1,33E-12  |
| PRRX1     | -11,1734 | 9,31E-13  |
| PRKCDBP   | -11,1854 | 8,64E-13  |
| LINC00667 | -11,1869 | 9,73E-13  |
| GREM2     | -11,2219 | 8,14E-13  |
| HMGA2     | -11,2274 | 1,42E-13  |
| SERPINB2  | -11,2411 | 8,25E-13  |
| GYPC      | -11,2704 | 5,21E-13  |
| FOXL2     | -11,2767 | 5,15E-13  |
| C5orf42   | -11,2816 | 4,91E-13  |
| TGFBI     | -11,289  | 2,97E-40  |
| ARSI      | -11,3232 | 4,20E-13  |
| C7orf31   | -11,328  | 5,27E-13  |
| PIEZO2    | -11,3389 | 3,92E-13  |
| SRGN      | -11,3513 | 7,33E-14  |
| ZNF300    | -11,357  | 4,56E-13  |
| GPR1      | -11,3584 | 3,06E-13  |
| WT1       | -11,3653 | 2,97E-13  |
| FLRT2     | -11,3862 | 7,42E-14  |
| SMIM10    | -11,4256 | 2,28E-13  |
| TLE4      | -11,4343 | 4,77E-14  |
| MARCH4    | -11,4412 | 2,01E-13  |
| LPAR1     | -11,4489 | 2,24E-13  |
| CGB8      | -11,4637 | 1,62E-13  |
| MMP14     | -11,4802 | 3,15E-06  |
| EBF1      | -11,4924 | 2,55E-13  |
| MSC-AS1   | -11,4935 | 1,46E-13  |
| PSG4      | -11,5123 | 1,35E-13  |
| THBS2     | -11,5155 | 1,23E-13  |
| STAC      | -11,6086 | 7,19E-14  |

|           |          |          |
|-----------|----------|----------|
| HECW1     | -11,6152 | 9,29E-14 |
| PAX6      | -11,6155 | 6,91E-14 |
| MAGI2-AS3 | -11,6544 | 5,23E-14 |
| MEOX2     | -11,6565 | 5,37E-14 |
| EYA1      | -11,6947 | 4,48E-14 |
| ZIK1      | -11,6976 | 4,66E-14 |
| GDNF      | -11,7075 | 3,74E-14 |
| INHBA     | -11,7094 | 4,34E-14 |
| NKX2-5    | -11,7153 | 3,89E-14 |
| SRPX2     | -11,7155 | 5,29E-14 |
| C8orf88   | -11,7297 | 3,26E-14 |
| DPYD      | -11,7616 | 2,77E-14 |
| EPHA5     | -11,7799 | 2,48E-14 |
| LAMA1     | -11,9017 | 2,12E-14 |
| TNFRSF10C | -11,9178 | 1,18E-14 |
| MSN       | -11,9413 | 1,04E-12 |
| FAP       | -11,9807 | 2,78E-14 |
| CDH11     | -12,0131 | 8,61E-15 |
| GNE       | -12,0409 | 5,82E-15 |
| PTPRM     | -12,0443 | 6,56E-15 |
| IFI16     | -12,0507 | 2,28E-29 |
| MMP2      | -12,0628 | 9,85E-43 |
| CYTL1     | -12,0899 | 4,82E-15 |
| ARHGAP31  | -12,09   | 1,13E-15 |
| VGLL3     | -12,1194 | 8,53E-15 |
| COL4A1    | -12,1502 | 1,24E-43 |
| LRRC15    | -12,1697 | 2,34E-15 |
| DFNA5     | -12,1794 | 2,06E-15 |
| EFEMP2    | -12,2019 | 1,90E-15 |
| GRAMD1B   | -12,2084 | 1,74E-15 |
| EMC10     | -12,2538 | 1,87E-15 |
| EYA4      | -12,2702 | 1,21E-15 |
| FBXL7     | -12,2788 | 1,20E-15 |
| GLIS1     | -12,2811 | 1,58E-15 |
| EPHA3     | -12,3067 | 9,65E-16 |
| ZCCHC11   | -12,3412 | 7,90E-16 |
| VSTM4     | -12,3593 | 7,06E-16 |
| HRH1      | -12,4047 | 5,27E-16 |
| CYBRD1    | -12,4117 | 5,48E-16 |
| ZNF518B   | -12,4262 | 4,96E-16 |
| SLC35G2   | -12,4474 | 3,99E-16 |
| FOXG1     | -12,4691 | 4,46E-16 |
| IGFBP7    | -12,4873 | 7,73E-16 |
| HOXA10    | -12,4915 | 2,96E-16 |
| GALNT5    | -12,5189 | 2,96E-16 |
| ALPK2     | -12,5458 | 2,15E-16 |
| ITGA4     | -12,5491 | 2,14E-16 |
| DDR2      | -12,5532 | 2,01E-16 |
| PVRL3     | -12,587  | 1,76E-16 |
| KANK4     | -12,5922 | 1,66E-16 |

|          |          |           |
|----------|----------|-----------|
| AK5      | -12,5943 | 1,59E-16  |
| ATP10A   | -12,6394 | 1,18E-16  |
| MMP3     | -12,6585 | 2,24E-16  |
| LZTS1    | -12,6955 | 8,82E-17  |
| TLR4     | -12,7471 | 8,61E-17  |
| NRN1     | -12,7494 | 6,52E-17  |
| SIGMAR1  | -12,7552 | 6,07E-33  |
| PDGFRB   | -12,8091 | 4,01E-17  |
| SGCE     | -12,8374 | 3,36E-17  |
| C2CD2    | -12,84   | 3,30E-17  |
| ITGA11   | -12,8567 | 4,00E-17  |
| MSC      | -12,9708 | 1,50E-17  |
| EVC      | -12,9758 | 1,52E-17  |
| TCF4     | -13,0621 | 8,29E-18  |
| CNRIP1   | -13,1081 | 6,77E-18  |
| SUSD5    | -13,1115 | 6,75E-18  |
| ZEB2     | -13,1449 | 8,01E-18  |
| NRIP3    | -13,2443 | 2,60E-18  |
| TCEAL8   | -13,2478 | 2,50E-18  |
| AKT3     | -13,251  | 3,95E-18  |
| MXRA8    | -13,2648 | 2,18E-18  |
| IL7R     | -13,3025 | 1,73E-18  |
| LAYN     | -13,326  | 1,71E-18  |
| IGF2BP3  | -13,3443 | 1,31E-18  |
| PPAPDC1A | -13,4133 | 8,29E-19  |
| RAC2     | -13,4229 | 7,75E-19  |
| WISP1    | -13,4272 | 8,80E-19  |
| AXL      | -13,547  | 1,05E-53  |
| ANGPTL2  | -13,5528 | 3,71E-19  |
| NNMT     | -13,5733 | 2,91E-19  |
| KIAA1644 | -13,5996 | 2,49E-19  |
| TMEM246  | -13,6746 | 1,56E-19  |
| TNFRSF9  | -13,7662 | 8,08E-20  |
| EPB41L3  | -13,769  | 9,24E-20  |
| MT1E     | -13,7799 | 7,70E-20  |
| ZFHX4    | -13,8183 | 5,75E-20  |
| ADAMTS1  | -13,8528 | 1,54E-20  |
| NID1     | -13,9073 | 3,54E-20  |
| FOXF2    | -13,9445 | 2,46E-20  |
| ANPEP    | -14,0927 | 1,01E-20  |
| ETS1     | -14,2401 | 3,69E-21  |
| COL6A3   | -14,2872 | 7,57E-139 |
| HSPB7    | -14,3247 | 1,92E-21  |
| WBP5     | -14,339  | 1,78E-21  |
| NRG1     | -14,5311 | 5,07E-22  |
| PLAU     | -14,5707 | 3,55E-22  |
| DZIP1    | -14,5835 | 3,35E-22  |
| CNN3     | -14,6273 | 8,72E-23  |
| MYL9     | -14,6755 | 1,70E-22  |
| GPX1     | -14,7816 | 1,06E-22  |

|        |          |          |
|--------|----------|----------|
| CDK15  | -14,7895 | 9,11E-23 |
| NT5E   | -15,0776 | 1,02E-23 |
| KIRREL | -15,1678 | 5,89E-24 |
| SNAI2  | -15,3398 | 1,74E-24 |
| COL1A2 | -16,6956 | 7,50E-29 |
| FLNC   | -17,0246 | 4,70E-30 |
| SPARC  | -17,7422 | 1,25E-32 |

UO31

| Gene     | log2FoldCh FDR |          |
|----------|----------------|----------|
| APCDD1   | 16,25276       | 1,73E-27 |
| BMP7     | 15,74618       | 5,48E-26 |
| FBP1     | 14,90931       | 4,17E-23 |
| TFF1     | 14,57842       | 6,32E-21 |
| TSPYL5   | 14,36734       | 1,06E-21 |
| CDH3     | 14,23128       | 1,64E-21 |
| SYT7     | 14,18583       | 3,80E-21 |
| GRHL2    | 14,06451       | 2,26E-20 |
| RAB25    | 14,02088       | 1,64E-20 |
| ATP2A3   | 13,93789       | 8,17E-07 |
| MYH14    | 13,88023       | 1,40E-19 |
| ESRP1    | 13,84411       | 3,83E-20 |
| TJP3     | 13,52048       | 5,42E-18 |
| TMEM30B  | 13,22945       | 2,70E-18 |
| LRFN4    | 13,14899       | 3,19E-18 |
| UQCRH    | 13,08733       | 2,67E-18 |
| DSCAM-AS | 13,07804       | 1,71E-10 |
| RTN4RL1  | 12,85922       | 2,19E-17 |
| BSPRY    | 12,81131       | 4,10E-17 |
| CACNA1H  | 12,75613       | 3,85E-17 |
| S100A14  | 12,72701       | 8,81E-31 |
| GGT6     | 12,70549       | 1,10E-15 |
| LINGO1   | 12,52785       | 1,80E-16 |
| IRX2     | 12,44365       | 3,06E-16 |
| SYNE4    | 12,4388        | 2,65E-16 |
| FXD3     | 12,39029       | 9,13E-09 |
| ALDH3B2  | 12,34419       | 6,58E-15 |
| SPDEF    | 12,34387       | 1,17E-14 |
| SPTSSB   | 12,32359       | 1,11E-14 |
| SYK      | 12,21346       | 1,24E-15 |
| CKMT1B   | 12,17336       | 1,43E-15 |
| KIF26A   | 12,12105       | 9,78E-15 |
| PCSK6    | 12,0779        | 3,39E-15 |
| ATP2C2   | 12,07105       | 4,97E-15 |
| TMEM150C | 12,00861       | 6,71E-15 |
| CBFA2T3  | 12,00219       | 3,92E-15 |
| RBBP8NL  | 11,97759       | 7,71E-15 |
| FAM83G   | 11,95046       | 5,25E-15 |
| NOTCH3   | 11,92484       | 1,24E-65 |
| FAM83B   | 11,91498       | 6,52E-15 |
| C15orf59 | 11,91128       | 4,68E-14 |
| HUNK     | 11,84707       | 9,47E-15 |
| YBX2     | 11,84007       | 5,77E-15 |
| DNAJA4   | 11,80285       | 2,29E-14 |
| OLFM1    | 11,77709       | 1,43E-14 |
| HENMT1   | 11,68735       | 2,50E-14 |
| ZFP3     | 11,67774       | 2,99E-14 |
| GYLTL1B  | 11,66021       | 2,46E-14 |



|          |          |           |
|----------|----------|-----------|
| PCDHB8   | 11,57181 | 5,80E-14  |
| CKMT1A   | 11,55224 | 5,48E-14  |
| ALOX15   | 11,54656 | 2,36E-12  |
| TMEM45B  | 11,53212 | 6,10E-14  |
| CLDN7    | 11,52895 | 1,75E-39  |
| RASGEF1A | 11,47873 | 1,31E-13  |
| HSPA1A   | 11,46364 | 7,94E-33  |
| SMIM22   | 11,43684 | 1,69E-13  |
| AQP3     | 11,34447 | 4,71E-07  |
| ASCL2    | 11,31949 | 1,13E-12  |
| C5orf38  | 11,30999 | 4,64E-13  |
| PCP4     | 11,30407 | 2,96E-13  |
| ASCL4    | 11,25651 | 3,83E-13  |
| OVOL1    | 11,18839 | 1,79E-12  |
| ARHGDIG  | 11,15954 | 5,70E-13  |
| NUP210L  | 11,13421 | 7,35E-13  |
| EFS      | 11,12882 | 7,99E-13  |
| TDRD1    | 11,11119 | 7,37E-13  |
| PRR15L   | 11,07817 | 7,45E-13  |
| DPYSL5   | 10,98947 | 2,53E-12  |
| KCNK15   | 10,97296 | 2,07E-12  |
| PGR      | 10,92583 | 1,66E-10  |
| C5AR2    | 10,90125 | 1,48E-11  |
| MB       | 10,89862 | 2,48E-12  |
| NRXN2    | 10,87858 | 3,00E-12  |
| SLC9A2   | 10,86741 | 1,29E-33  |
| PCDHB13  | 10,82165 | 4,47E-12  |
| NAALADL2 | 10,81204 | 6,86E-12  |
| LRP2     | 10,80176 | 2,86E-06  |
| FUT1     | 10,76197 | 1,06E-10  |
| RET      | 10,7316  | 8,06E-11  |
| LMX1B    | 10,72053 | 7,14E-12  |
| CDH1     | 10,68521 | 1,88E-137 |
| SPESP1   | 10,67511 | 1,70E-11  |
| KCNH2    | 10,66951 | 9,47E-12  |
| CCDC64B  | 10,65317 | 1,95E-11  |
| TMEM125  | 10,61178 | 1,32E-11  |
| ASS1     | 10,5756  | 2,05E-95  |
| WNT11    | 10,56267 | 3,46E-10  |
| ODAM     | 10,52964 | 2,11E-11  |
| CEACAM21 | 10,52011 | 2,48E-11  |
| TDRD5    | 10,49831 | 4,33E-11  |
| TSPEAR   | 10,48663 | 7,59E-11  |
| CHGA     | 10,45211 | 3,26E-11  |
| DPYSL4   | 10,42426 | 1,35E-10  |
| SLC9B2   | 10,42333 | 4,70E-11  |
| PCDHA10  | 10,40117 | 6,03E-11  |
| SLC1A2   | 10,39742 | 1,30E-11  |
| ADGRB1   | 10,36658 | 1,35E-11  |
| FAR2     | 10,35474 | 1,42E-11  |

|            |          |          |
|------------|----------|----------|
| SCN4A      | 10,33945 | 2,48E-09 |
| CASC9      | 10,32816 | 6,69E-11 |
| AARD       | 10,27272 | 9,36E-11 |
| CHRM1      | 10,24918 | 5,37E-10 |
| HIST3H2A   | 10,24293 | 1,09E-10 |
| HR         | 10,2218  | 6,02E-21 |
| RNF223     | 10,2205  | 1,67E-10 |
| CNTNAP2    | 10,21922 | 1,91E-10 |
| PRR15      | 10,15782 | 2,93E-10 |
| KRTAP3-1   | 10,1558  | 1,10E-09 |
| C18orf63   | 10,13036 | 3,17E-10 |
| RERG       | 10,12034 | 2,22E-10 |
| XYLT1      | 10,04083 | 3,59E-10 |
| ZNF732     | 9,980511 | 1,14E-09 |
| TC2N       | 9,959165 | 1,73E-26 |
| BATF       | 9,958711 | 1,48E-09 |
| FAR2P1     | 9,876881 | 9,42E-09 |
| EPHB3      | 9,871924 | 2,78E-10 |
| KCNC3      | 9,864927 | 7,73E-19 |
| SLC9A4     | 9,85833  | 9,09E-09 |
| SLC26A4-A' | 9,85432  | 1,01E-09 |
| CXCL12     | 9,851755 | 1,17E-09 |
| DEGS2      | 9,851737 | 1,33E-09 |
| MISP       | 9,845735 | 5,90E-08 |
| KIF1A      | 9,838404 | 2,98E-19 |
| PRIMA1     | 9,826784 | 7,10E-09 |
| NMU        | 9,817473 | 1,74E-09 |
| CHST8      | 9,762624 | 1,64E-09 |
| POF1B      | 9,757512 | 6,67E-17 |
| ZNF311     | 9,746658 | 1,19E-08 |
| MUCL1      | 9,737752 | 1,13E-06 |
| MATK       | 9,728849 | 2,45E-43 |
| S100P      | 9,722392 | 5,54E-07 |
| BCL11B     | 9,689256 | 2,92E-35 |
| JPH3       | 9,68321  | 2,58E-09 |
| PTK6       | 9,673988 | 3,26E-09 |
| TMPRSS13   | 9,673394 | 7,35E-10 |
| ILDR1      | 9,663267 | 4,97E-10 |
| TUBA3E     | 9,630514 | 7,32E-09 |
| KLHDC7B    | 9,623463 | 3,53E-09 |
| ZG16B      | 9,602035 | 5,48E-08 |
| PCDHB6     | 9,600011 | 5,90E-09 |
| UQCRHL     | 9,591384 | 5,05E-09 |
| C10orf82   | 9,5863   | 8,23E-09 |
| FSD1       | 9,583216 | 5,17E-09 |
| MUC5B      | 9,576451 | 4,83E-09 |
| ACTG2      | 9,555175 | 1,58E-07 |
| PPM1E      | 9,539995 | 3,60E-20 |
| CHRM3      | 9,523483 | 6,36E-09 |
| MYT1       | 9,509067 | 6,95E-09 |

|           |          |          |
|-----------|----------|----------|
| MANSC4    | 9,498872 | 1,54E-06 |
| RIMS4     | 9,498207 | 4,41E-09 |
| TNFAIP8L3 | 9,497655 | 1,19E-15 |
| ADAMTS19  | 9,496364 | 8,97E-26 |
| GPR158    | 9,491156 | 8,23E-09 |
| IRX4      | 9,489016 | 1,82E-08 |
| DLX5      | 9,488963 | 1,04E-17 |
| FAM19A5   | 9,467611 | 1,60E-08 |
| C9orf152  | 9,459761 | 1,39E-16 |
| TMC4      | 9,457185 | 2,95E-24 |
| PCDHGB5   | 9,430857 | 1,04E-08 |
| PPP2R2C   | 9,416208 | 1,57E-55 |
| FUT9      | 9,411018 | 1,16E-08 |
| CRLF1     | 9,402744 | 1,73E-08 |
| SUSD2     | 9,402116 | 4,10E-08 |
| DDX43     | 9,397957 | 1,85E-08 |
| CD8A      | 9,394124 | 1,27E-08 |
| GPR27     | 9,391538 | 1,75E-08 |
| FIRRE     | 9,387858 | 5,95E-08 |
| TUBA3D    | 9,387318 | 3,15E-08 |
| ESR1      | 9,374839 | 7,74E-53 |
| SULT2B1   | 9,356721 | 9,96E-17 |
| ADGRE2    | 9,347491 | 2,09E-08 |
| KCNK5     | 9,342983 | 1,05E-07 |
| PLA2G4F   | 9,330872 | 1,64E-06 |
| PRSS8     | 9,299197 | 1,40E-74 |
| GPX2      | 9,290648 | 9,67E-06 |
| LRP3      | 9,282291 | 1,44E-07 |
| ZNF354C   | 9,256252 | 3,30E-08 |
| FCGR1A    | 9,23195  | 2,85E-07 |
| C17orf104 | 9,229277 | 2,27E-07 |
| CELF5     | 9,206995 | 9,25E-08 |
| AKR1C2    | 9,206805 | 5,28E-08 |
| CPT1C     | 9,202431 | 1,51E-07 |
| EYA2      | 9,195503 | 2,07E-07 |
| HBA1      | 9,193176 | 1,05E-07 |
| RGS6      | 9,19055  | 7,91E-08 |
| TLE2      | 9,184745 | 3,64E-24 |
| FGB       | 9,176661 | 2,53E-05 |
| ONECUT1   | 9,174621 | 1,16E-07 |
| LGR6      | 9,174178 | 7,56E-08 |
| CA8       | 9,1738   | 7,85E-08 |
| INHA      | 9,148659 | 1,20E-05 |
| CNGB3     | 9,143975 | 7,62E-08 |
| LOC339862 | 9,141717 | 6,14E-08 |
| RIC3      | 9,122826 | 1,16E-07 |
| PALM3     | 9,098637 | 6,63E-08 |
| LINC00992 | 9,07085  | 9,07E-08 |
| BLNK      | 9,070655 | 4,29E-06 |
| ADIRF     | 9,068311 | 8,38E-18 |

|           |          |          |
|-----------|----------|----------|
| DNAH3     | 9,067209 | 1,27E-07 |
| CXXC4     | 9,065586 | 1,12E-07 |
| NRG3      | 9,055512 | 1,60E-07 |
| C1orf210  | 9,008528 | 2,26E-07 |
| LINC00858 | 8,990878 | 3,65E-07 |
| ADRA2C    | 8,978619 | 5,92E-49 |
| CRABP1    | 8,969711 | 5,75E-07 |
| TACSTD2   | 8,960975 | 4,11E-82 |
| SPSB4     | 8,958987 | 3,96E-07 |
| GRIK3     | 8,930797 | 1,14E-06 |
| NPNT      | 8,922948 | 7,91E-21 |
| MAOB      | 8,922788 | 9,01E-07 |
| DEF6      | 8,917976 | 1,77E-08 |
| RPRM      | 8,912911 | 6,87E-07 |
| S100A9    | 8,898911 | 8,14E-05 |
| HTR2C     | 8,898862 | 2,01E-07 |
| KIAA1257  | 8,882001 | 4,19E-07 |
| RADIL     | 8,866194 | 1,24E-06 |
| PCDHA5    | 8,860842 | 2,49E-07 |
| CALCR     | 8,851969 | 4,08E-07 |
| KCNMB2-A  | 8,848239 | 2,52E-07 |
| LOC100288 | 8,84821  | 3,15E-07 |
| SNCAIP    | 8,842129 | 2,61E-07 |
| KCNV1     | 8,837568 | 1,18E-06 |
| PLA2G3    | 8,835851 | 2,85E-06 |
| ESRP2     | 8,805211 | 3,88E-67 |
| SERPINB5  | 8,803137 | 1,18E-05 |
| TMPRSS4   | 8,798217 | 6,20E-07 |
| MPPED2    | 8,788784 | 1,84E-06 |
| TPTE      | 8,779205 | 4,46E-07 |
| LOC644915 | 8,766351 | 6,83E-07 |
| FLT4      | 8,765186 | 1,95E-06 |
| ERG       | 8,763363 | 4,03E-07 |
| ADAMTS19  | 8,756884 | 4,35E-07 |
| DSCAM     | 8,754499 | 1,38E-06 |
| TENM1     | 8,733281 | 9,49E-07 |
| STMND1    | 8,73324  | 5,18E-07 |
| PACSIN1   | 8,728872 | 2,52E-13 |
| ENTPD2    | 8,725112 | 7,55E-14 |
| CCL5      | 8,706746 | 1,31E-05 |
| FRMPD1    | 8,695789 | 7,11E-07 |
| LINC00052 | 8,693484 | 4,71E-07 |
| CCDC83    | 8,689507 | 1,08E-06 |
| MARVELD3  | 8,657178 | 2,44E-27 |
| FAAH2     | 8,651887 | 1,07E-06 |
| LOC100134 | 8,621515 | 1,00E-06 |
| OVOL2     | 8,607221 | 7,33E-07 |
| LOC728735 | 8,599485 | 1,12E-06 |
| TBC1D30   | 8,543722 | 1,12E-62 |
| BCAS1     | 8,543395 | 0,00018  |

|           |          |           |
|-----------|----------|-----------|
| MSI1      | 8,538763 | 1,26E-51  |
| IGF1      | 8,535202 | 1,48E-06  |
| PCDH19    | 8,528231 | 3,61E-06  |
| FAM83E    | 8,510019 | 4,59E-06  |
| ASCL1     | 8,500992 | 2,44E-07  |
| PRRT4     | 8,493896 | 2,08E-06  |
| BRSK2     | 8,493859 | 2,74E-06  |
| RFTN2     | 8,487245 | 3,61E-06  |
| NOTUM     | 8,480507 | 9,46E-13  |
| TMEM132f  | 8,471908 | 0,000201  |
| LOC100130 | 8,464261 | 2,41E-06  |
| CST1      | 8,463119 | 1,42E-13  |
| NPR3      | 8,462136 | 7,41E-14  |
| ZNF704    | 8,459974 | 1,30E-39  |
| CEBPA-AS1 | 8,435804 | 5,38E-06  |
| HLA-DRB5  | 8,413875 | 4,76E-06  |
| RGMA      | 8,411193 | 3,89E-13  |
| SLC22A11  | 8,403938 | 1,67E-05  |
| PVALB     | 8,40001  | 1,06E-05  |
| ASCL5     | 8,399247 | 2,70E-06  |
| NMUR2     | 8,392816 | 2,89E-06  |
| TCHHL1    | 8,387889 | 0,000317  |
| HRK       | 8,385101 | 0,00011   |
| UNC5C     | 8,380102 | 1,40E-05  |
| GUCY1B2   | 8,377821 | 1,40E-05  |
| EPPK1     | 8,377734 | 1,43E-34  |
| TOX2      | 8,374672 | 2,22E-07  |
| TNNT1     | 8,372155 | 5,00E-148 |
| ARHGAP4   | 8,367415 | 3,25E-07  |
| EPN3      | 8,36132  | 4,33E-73  |
| SOX18     | 8,355776 | 3,39E-06  |
| LLPH-AS1  | 8,345854 | 3,54E-06  |
| GATA5     | 8,339897 | 4,26E-06  |
| ITGA2B    | 8,338746 | 8,44E-07  |
| SNAR-E    | 8,338447 | 1,14E-05  |
| IGFL1     | 8,331303 | 0,000299  |
| SERPINA3  | 8,321177 | 1,22E-05  |
| HPN       | 8,319268 | 9,61E-13  |
| NODAL     | 8,317743 | 8,92E-06  |
| WIF1      | 8,317348 | 4,47E-05  |
| LOC102723 | 8,306885 | 5,02E-06  |
| SLC6A14   | 8,296569 | 5,14E-06  |
| CLCA2     | 8,29237  | 0,000134  |
| INHBB     | 8,257057 | 5,20E-18  |
| HOXD12    | 8,247269 | 3,80E-05  |
| CILP2     | 8,234898 | 1,14E-05  |
| RORC      | 8,231287 | 8,99E-06  |
| MYO15B    | 8,226968 | 7,35E-06  |
| HS6ST3    | 8,224865 | 8,13E-06  |
| SLC27A3   | 8,223498 | 2,57E-56  |

|           |          |          |
|-----------|----------|----------|
| FES       | 8,219784 | 6,80E-06 |
| FAM46C    | 8,219013 | 7,57E-14 |
| F7        | 8,207175 | 4,37E-05 |
| TARP      | 8,199625 | 5,13E-05 |
| LINC01124 | 8,194949 | 1,40E-05 |
| GLDN      | 8,193448 | 9,85E-06 |
| DHRS2     | 8,189261 | 5,10E-30 |
| SLC52A3   | 8,187579 | 1,56E-05 |
| BST2      | 8,185768 | 3,73E-21 |
| IGFBP2    | 8,182129 | 1,80E-84 |
| EPHA10    | 8,168242 | 5,61E-07 |
| PART1     | 8,144717 | 1,32E-05 |
| LOC100996 | 8,136356 | 1,51E-05 |
| ESPN      | 8,132849 | 7,95E-18 |
| TRIL      | 8,132481 | 2,04E-05 |
| LRG1      | 8,125873 | 9,04E-05 |
| PTP4A3    | 8,123533 | 1,30E-27 |
| TEX19     | 8,118844 | 8,20E-07 |
| CBLC      | 8,118273 | 8,55E-07 |
| TRPV6     | 8,117058 | 1,23E-05 |
| FOXI3     | 8,0776   | 1,61E-05 |
| AR        | 8,066918 | 4,85E-23 |
| POU6F2    | 8,062405 | 1,78E-05 |
| KCNN1     | 8,061609 | 3,55E-05 |
| COLCA1    | 8,052622 | 1,98E-05 |
| KRTAP5-AS | 8,047778 | 8,72E-15 |
| C2CD4C    | 8,040382 | 3,51E-05 |
| CYP1A1    | 8,040202 | 1,13E-09 |
| GHR       | 8,033816 | 1,78E-05 |
| VAV3      | 8,022216 | 4,13E-46 |
| PRDM6     | 8,017171 | 1,29E-06 |
| IGSF11    | 8,015611 | 1,87E-05 |
| TTYH1     | 8,002457 | 0,000123 |
| CEBPA     | 7,993017 | 7,39E-23 |
| CLDN9     | 7,976742 | 4,53E-05 |
| MGC32805  | 7,970889 | 1,00E-04 |
| POU3F3    | 7,967444 | 2,82E-06 |
| ACOXL     | 7,967365 | 7,20E-05 |
| ZNF467    | 7,963579 | 3,45E-60 |
| KRT16     | 7,958857 | 0,000137 |
| MAFB      | 7,952646 | 6,64E-19 |
| SNCB      | 7,92035  | 0,000319 |
| LAMC3     | 7,912812 | 3,23E-05 |
| XG        | 7,909792 | 0,000646 |
| TMEM105   | 7,903823 | 6,41E-05 |
| ICOS      | 7,894799 | 3,87E-05 |
| ARL11     | 7,893829 | 3,82E-05 |
| LOC440461 | 7,893034 | 9,51E-05 |
| ALDH3A1   | 7,888136 | 3,27E-05 |
| BARX2     | 7,888115 | 0,00022  |

|           |          |           |
|-----------|----------|-----------|
| EMCN      | 7,880152 | 4,30E-05  |
| LOC100506 | 7,879759 | 3,85E-06  |
| SP5       | 7,878204 | 8,42E-102 |
| LINC00885 | 7,872246 | 0,000284  |
| EWSAT1    | 7,869114 | 8,29E-05  |
| IGSF1     | 7,856491 | 0,000295  |
| LRRC10B   | 7,852378 | 0,000102  |
| BEX5      | 7,851691 | 0,000179  |
| JAKMIP3   | 7,849668 | 4,75E-05  |
| LRRC26    | 7,844723 | 2,13E-11  |
| FAM3B     | 7,842274 | 3,59E-16  |
| BAMBI     | 7,841072 | 9,17E-146 |
| KRTAP4-1  | 7,827021 | 9,17E-05  |
| CLDN3     | 7,824307 | 1,31E-126 |
| WISP2     | 7,812155 | 7,60E-05  |
| AP3B2     | 7,811108 | 8,05E-06  |
| SYT5      | 7,800115 | 5,82E-05  |
| CYP4F22   | 7,790406 | 8,03E-05  |
| CALML5    | 7,779694 | 0,000121  |
| HCN4      | 7,777574 | 3,85E-11  |
| GJB5      | 7,777065 | 0,000447  |
| ALOX12P2  | 7,766611 | 0,000296  |
| TLX1NB    | 7,7599   | 6,44E-05  |
| PROM2     | 7,749756 | 3,78E-41  |
| GJD3      | 7,744883 | 0,000125  |
| KLB       | 7,720561 | 8,86E-05  |
| C8orf48   | 7,720494 | 9,24E-05  |
| DRD1      | 7,710831 | 0,0008    |
| CAPN9     | 7,699946 | 0,000114  |
| B3GALT4   | 7,695406 | 2,08E-05  |
| MUC20     | 7,693011 | 0,000694  |
| DEFB126   | 7,691606 | 8,95E-05  |
| SNAR-G1   | 7,672652 | 0,000138  |
| S1PR5     | 7,669532 | 0,000111  |
| OXGR1     | 7,663141 | 0,000153  |
| CELF3     | 7,640592 | 0,000194  |
| TTN-AS1   | 7,636287 | 0,000122  |
| ANXA9     | 7,632594 | 4,24E-23  |
| LINC00925 | 7,611925 | 2,03E-10  |
| WNT9A     | 7,604457 | 0,000231  |
| IBSP      | 7,601147 | 0,000139  |
| LOC113230 | 7,589262 | 3,64E-22  |
| GNG13     | 7,577917 | 1,67E-05  |
| KCNJ4     | 7,576427 | 0,000167  |
| CEACAM5   | 7,574311 | 0,000436  |
| GADD45G   | 7,571515 | 2,73E-12  |
| LINC00494 | 7,567395 | 0,000155  |
| PRDM16    | 7,567335 | 0,000337  |
| C19orf45  | 7,549072 | 0,000168  |
| CEACAM6   | 7,541216 | 0,00078   |

|           |          |          |
|-----------|----------|----------|
| CA4       | 7,537524 | 0,000241 |
| HIST1H3E  | 7,514146 | 0,000467 |
| FAM83F    | 7,496364 | 0,000583 |
| ZSCAN12P1 | 7,49523  | 6,06E-10 |
| ETNPPL    | 7,482815 | 0,00092  |
| BRINP2    | 7,473422 | 0,00052  |
| COL3A1    | 7,469725 | 0,000417 |
| GPC3      | 7,447513 | 0,000725 |
| PDE9A     | 7,442886 | 1,55E-05 |
| KCNK2     | 7,430157 | 0,000629 |
| PRLR      | 7,40943  | 2,86E-45 |
| ELF5      | 7,401332 | 4,88E-08 |
| PVRL4     | 7,400557 | 3,79E-30 |
| SLC17A7   | 7,36364  | 0,000604 |
| LRFN5     | 7,349145 | 0,000403 |
| ARHGEF4   | 7,345756 | 2,02E-05 |
| SSPO      | 7,331869 | 0,000608 |
| EDAR      | 7,329582 | 5,79E-05 |
| HID1      | 7,309101 | 3,20E-65 |
| HLA-DRB1  | 7,302209 | 2,57E-08 |
| PDIA2     | 7,300713 | 0,000488 |
| MIR2052H  | 7,299358 | 0,000894 |
| RDH16     | 7,295616 | 5,25E-19 |
| RIMKLA    | 7,290784 | 3,24E-13 |
| HSD17B14  | 7,279286 | 2,57E-05 |
| IZUMO1    | 7,270308 | 0,000629 |
| PAQR5     | 7,268815 | 2,63E-13 |
| MCF2L-AS1 | 7,267507 | 0,000697 |
| LINC00659 | 7,267507 | 0,000697 |
| MB21D1    | 7,265861 | 3,00E-05 |
| FGF13     | 7,264692 | 0,000788 |
| NKD2      | 7,257563 | 2,98E-13 |
| HAGLROS   | 7,256226 | 0,000584 |
| PTPRQ     | 7,253415 | 0,000599 |
| SIX2      | 7,249134 | 0,000892 |
| PCDHA13   | 7,248368 | 2,99E-05 |
| SLC22A23  | 7,245945 | 6,23E-91 |
| PCBP3     | 7,237219 | 1,38E-12 |
| ABCC8     | 7,233457 | 0,00064  |
| DLL4      | 7,221909 | 0,000858 |
| MYCN      | 7,214668 | 0,000724 |
| WNK2      | 7,207631 | 1,17E-41 |
| LPAR5     | 7,207377 | 0,000182 |
| LRRC16B   | 7,205968 | 0,000725 |
| HLA-DQB1  | 7,205871 | 2,75E-08 |
| SUSD3     | 7,199285 | 2,30E-14 |
| MAPK4     | 7,180564 | 6,20E-07 |
| NOX5      | 7,1704   | 0,00096  |
| CARD14    | 7,159692 | 6,46E-05 |
| EPHA1     | 7,157308 | 5,45E-26 |



|           |          |           |
|-----------|----------|-----------|
| PAX5      | 7,156047 | 0,000203  |
| SYT17     | 7,142549 | 1,95E-21  |
| FAM155B   | 7,129903 | 2,25E-18  |
| MYRFL     | 7,128783 | 0,000421  |
| SPINK5    | 7,124435 | 1,74E-07  |
| PRSS27    | 7,118386 | 5,33E-05  |
| TFF3      | 7,113244 | 7,01E-12  |
| TYRP1     | 7,099464 | 1,15E-08  |
| FGF12     | 7,059273 | 1,93E-17  |
| PCDHB14   | 7,056352 | 1,09E-27  |
| WNT6      | 7,027619 | 6,77E-05  |
| MLXIPL    | 7,009584 | 4,80E-11  |
| KCNJ3     | 6,98948  | 3,89E-08  |
| TEX40     | 6,977465 | 8,22E-05  |
| EOMES     | 6,973531 | 1,98E-08  |
| SLC24A3   | 6,962464 | 1,55E-11  |
| ALG1L     | 6,952308 | 2,35E-20  |
| UCP2      | 6,935456 | 1,28E-126 |
| SYTL1     | 6,913169 | 3,43E-28  |
| C2orf54   | 6,896589 | 2,60E-06  |
| ALDOC     | 6,877706 | 1,35E-26  |
| RIPPLY3   | 6,866875 | 0,000134  |
| PRPH      | 6,846488 | 1,43E-07  |
| CSTA      | 6,814488 | 3,88E-10  |
| TRPM2-AS  | 6,812822 | 0,000154  |
| RGS16     | 6,79261  | 4,93E-15  |
| PDE3B     | 6,773377 | 6,22E-17  |
| TINCR     | 6,762009 | 3,11E-15  |
| TP53I11   | 6,746541 | 9,52E-66  |
| ELL3      | 6,743801 | 1,08E-20  |
| FIBCD1    | 6,715264 | 2,49E-14  |
| PLXNA4    | 6,689089 | 1,77E-17  |
| SFMBT2    | 6,686852 | 3,33E-07  |
| ABCG1     | 6,649338 | 1,07E-35  |
| KDF1      | 6,632163 | 4,65E-30  |
| PCDHA11   | 6,598794 | 8,80E-36  |
| GFRA3     | 6,597    | 0,000979  |
| GAL       | 6,596618 | 2,39E-71  |
| HES2      | 6,561154 | 4,14E-10  |
| BNIP1     | 6,557687 | 1,06E-05  |
| APOA1     | 6,5559   | 0,000448  |
| ZNF418    | 6,550254 | 0,000447  |
| GALNT16   | 6,52511  | 5,77E-14  |
| GATA3-AS1 | 6,513061 | 0,000517  |
| IGSF9     | 6,500515 | 1,12E-121 |
| NFE2      | 6,49918  | 1,58E-13  |
| EPS8L1    | 6,490023 | 9,30E-19  |
| TH        | 6,488408 | 0,000768  |
| LYPD3     | 6,484153 | 1,13E-22  |
| RNF150    | 6,468015 | 7,22E-07  |

|          |          |           |
|----------|----------|-----------|
| HTR6     | 6,463518 | 0,00055   |
| PCDHB9   | 6,45763  | 6,80E-13  |
| SEPT3    | 6,447867 | 5,55E-25  |
| POTEF    | 6,423365 | 0,00069   |
| ABLM2    | 6,417344 | 8,87E-07  |
| PCDHA6   | 6,412895 | 2,59E-64  |
| ZNF385C  | 6,406103 | 8,42E-07  |
| FAM178B  | 6,379906 | 2,87E-05  |
| FBXL16   | 6,378843 | 5,73E-24  |
| PCDHB3   | 6,364356 | 1,70E-33  |
| ADAM11   | 6,358188 | 5,76E-17  |
| ENTPD1   | 6,346953 | 6,31E-15  |
| PAX9     | 6,336048 | 1,36E-08  |
| DNAAF3   | 6,330092 | 4,66E-33  |
| COLEC12  | 6,304834 | 2,02E-27  |
| EGR3     | 6,286542 | 1,13E-05  |
| KRTCAP3  | 6,274912 | 3,07E-32  |
| CYP1B1   | 6,257272 | 7,70E-30  |
| C19orf57 | 6,246395 | 1,51E-05  |
| MAPT     | 6,245593 | 8,20E-38  |
| GRHL3    | 6,243581 | 4,65E-18  |
| KCNN2    | 6,237601 | 4,81E-06  |
| MYRIP    | 6,237233 | 3,49E-15  |
| LLGL2    | 6,227653 | 1,79E-47  |
| PCDHA12  | 6,224555 | 9,90E-12  |
| SIDT1    | 6,207313 | 3,76E-12  |
| BEND5    | 6,201918 | 2,32E-09  |
| ZSWIM5   | 6,195281 | 4,99E-10  |
| DIRAS1   | 6,192872 | 1,57E-30  |
| HAGLR    | 6,188252 | 3,46E-06  |
| TCHH     | 6,175848 | 1,23E-05  |
| TFAP2C   | 6,160046 | 8,71E-104 |
| GALM     | 6,150547 | 6,45E-14  |
| TMOD2    | 6,139437 | 8,34E-20  |
| KAZALD1  | 6,136316 | 4,12E-08  |
| FAM81B   | 6,122833 | 1,72E-05  |
| CFD      | 6,122319 | 3,20E-12  |
| KYNU     | 6,113509 | 1,28E-29  |
| ADGRV1   | 6,111649 | 4,15E-09  |
| DLGAP3   | 6,103759 | 4,73E-14  |
| CCDC170  | 6,088898 | 1,46E-20  |
| FHDC1    | 6,081805 | 8,21E-20  |
| DYNC1I1  | 6,070003 | 2,54E-56  |
| PCDHB4   | 6,068783 | 1,21E-06  |
| OR7E14P  | 6,031421 | 1,35E-11  |
| MNX1-AS1 | 6,027925 | 7,43E-20  |
| ERBB3    | 6,020312 | 9,74E-117 |
| REEP1    | 6,019927 | 7,93E-08  |
| LIN7A    | 6,01283  | 3,53E-30  |
| BEST1    | 5,982743 | 0,000218  |

|            |          |           |
|------------|----------|-----------|
| CRMP1      | 5,982242 | 7,09E-24  |
| LOC148705  | 5,974029 | 1,42E-08  |
| MUC1       | 5,949507 | 8,02E-26  |
| NKAIN1     | 5,942051 | 1,07E-27  |
| AP4B1-AS1  | 5,928064 | 1,51E-21  |
| RUNDC3A    | 5,923599 | 6,62E-05  |
| PRRG2      | 5,911371 | 9,08E-10  |
| HOXC13-AS1 | 5,889124 | 3,77E-07  |
| NCAM2      | 5,887442 | 5,52E-26  |
| FLRT3      | 5,885295 | 1,10E-69  |
| TMEM191A   | 5,863297 | 4,05E-31  |
| LTBP1      | 5,854787 | 1,14E-90  |
| ACTL8      | 5,852724 | 3,33E-08  |
| PCDHB10    | 5,84419  | 1,25E-06  |
| RNF43      | 5,830116 | 1,58E-111 |
| LINC00649  | 5,798    | 7,21E-05  |
| OLFM2      | 5,79635  | 7,17E-38  |
| CXADR      | 5,78231  | 1,12E-43  |
| CDC42EP5   | 5,774756 | 2,29E-06  |
| DMC1       | 5,774713 | 2,01E-05  |
| KCNJ11     | 5,769346 | 1,89E-14  |
| PAH        | 5,757734 | 0,000127  |
| PCDHGA4    | 5,750418 | 0,000125  |
| FGD3       | 5,73821  | 6,48E-17  |
| DOC2A      | 5,717034 | 1,51E-13  |
| GRTP1      | 5,71399  | 1,40E-24  |
| CCM2L      | 5,706974 | 1,86E-09  |
| PRR36      | 5,692946 | 5,39E-117 |
| N4BP3      | 5,623465 | 2,53E-34  |
| RGAG4      | 5,612255 | 3,59E-07  |
| CIART      | 5,591331 | 3,61E-21  |
| GUCY1A3    | 5,562459 | 2,94E-18  |
| NEURL1B    | 5,557183 | 1,92E-46  |
| DLX3       | 5,554126 | 1,63E-24  |
| GATA3      | 5,544602 | 1,12E-123 |
| NPL        | 5,54189  | 1,50E-12  |
| EFNA2      | 5,527698 | 1,50E-05  |
| SPINT1     | 5,527494 | 1,01E-91  |
| KHK        | 5,503337 | 6,76E-47  |
| ADSSL1     | 5,503238 | 7,59E-08  |
| LINC01132  | 5,500872 | 7,46E-06  |
| ZNF114     | 5,495385 | 2,76E-19  |
| PCDHGA1    | 5,48308  | 0,000379  |
| HPDL       | 5,481971 | 9,67E-16  |
| CEL        | 5,469543 | 1,83E-07  |
| AGR2       | 5,464643 | 0,000349  |
| PCDHGB7    | 5,457154 | 0,000473  |
| ELMO3      | 5,4566   | 4,41E-62  |
| LINC01547  | 5,456245 | 2,77E-10  |
| SLC22A31   | 5,446397 | 2,62E-08  |

|          |          |          |
|----------|----------|----------|
| GOLT1A   | 5,445639 | 4,95E-15 |
| KREMEN2  | 5,437581 | 7,45E-66 |
| RCAN3    | 5,420547 | 1,88E-10 |
| GREB1    | 5,407617 | 1,79E-74 |
| FAM83H-A | 5,39582  | 2,14E-54 |
| ARHGAP44 | 5,391058 | 6,42E-22 |
| GOLGA7B  | 5,38782  | 6,14E-13 |
| GPM6B    | 5,381555 | 0,00028  |
| TIMP3    | 5,378529 | 2,71E-12 |
| XKRX     | 5,375533 | 0,000145 |
| ACE      | 5,356598 | 9,76E-05 |
| LRRC73   | 5,345477 | 1,10E-10 |
| SLC30A3  | 5,344767 | 7,72E-07 |
| ADCY1    | 5,32144  | 3,47E-37 |
| ZFYVE28  | 5,308415 | 7,36E-24 |
| PLCB1    | 5,305955 | 2,52E-26 |
| RAP1GAP  | 5,304541 | 1,03E-15 |
| IFITM1   | 5,303452 | 5,00E-10 |
| EPHA6    | 5,271792 | 4,21E-13 |
| NEB      | 5,26763  | 2,09E-42 |
| LHX4     | 5,266111 | 2,10E-34 |
| PDZD4    | 5,265849 | 1,26E-12 |
| DLX4     | 5,262897 | 1,57E-05 |
| MYO5C    | 5,255173 | 1,19E-81 |
| GJB2     | 5,250607 | 6,57E-19 |
| ARC      | 5,238356 | 2,33E-06 |
| MUC3A    | 5,228116 | 3,53E-06 |
| PK3      | 5,216941 | 3,13E-34 |
| TMEM229f | 5,206124 | 2,10E-14 |
| PALM     | 5,17319  | 2,21E-29 |
| CCDC64   | 5,170568 | 1,56E-22 |
| ERBB4    | 5,14034  | 6,40E-13 |
| EFR3B    | 5,126864 | 2,48E-27 |
| WDR72    | 5,093029 | 1,31E-59 |
| F12      | 5,074979 | 1,43E-92 |
| NMNAT2   | 5,069453 | 1,45E-12 |
| RAB3D    | 5,064505 | 1,05E-59 |
| NUPR1    | 5,045574 | 1,73E-15 |
| VGF      | 5,039764 | 1,91E-28 |
| CLIC3    | 5,033512 | 1,07E-05 |
| HNRNPLL  | 5,032476 | 2,13E-34 |
| BCAS3    | 5,02216  | 3,20E-76 |
| MYCL     | 5,019182 | 2,01E-10 |
| PTCHD2   | 5,010804 | 5,16E-06 |
| HIST1H3G | 5,009903 | 0,000112 |
| RPL39L   | 5,009228 | 3,50E-45 |
| SOBP     | 5,007625 | 3,93E-09 |
| TEX14    | 5,005147 | 8,83E-05 |
| WNT10B   | 5,003472 | 1,58E-09 |
| NEBL     | 4,996028 | 1,56E-47 |

|          |          |           |
|----------|----------|-----------|
| FREM2    | 4,992439 | 1,07E-143 |
| LMTK3    | 4,981188 | 2,64E-16  |
| MARK1    | 4,960962 | 0,000244  |
| HLF      | 4,960235 | 0,000162  |
| UPK2     | 4,935891 | 4,59E-07  |
| PTPRO    | 4,934877 | 2,09E-21  |
| STON2    | 4,929003 | 1,24E-59  |
| PKP1     | 4,919883 | 1,46E-11  |
| PCDHGA5  | 4,909438 | 0,000222  |
| TBX2-AS1 | 4,898252 | 2,07E-11  |
| JUP      | 4,895337 | 1,62E-41  |
| RHOV     | 4,888801 | 2,29E-22  |
| PCDHB16  | 4,878507 | 2,56E-27  |
| KLRG2    | 4,85735  | 3,16E-08  |
| PKIB     | 4,855494 | 7,99E-50  |
| CBX2     | 4,853516 | 5,40E-103 |
| RORA     | 4,85114  | 1,14E-26  |
| SRRM3    | 4,8473   | 4,80E-07  |
| NRARP    | 4,832727 | 1,70E-21  |
| TMPRSS2  | 4,830942 | 3,93E-09  |
| RAB26    | 4,829262 | 3,57E-09  |
| RPP25    | 4,815145 | 6,44E-60  |
| MPP7     | 4,813533 | 1,01E-47  |
| AKR1E2   | 4,809411 | 3,30E-06  |
| C15orf65 | 4,800786 | 2,04E-08  |
| SBK1     | 4,793009 | 4,38E-91  |
| ARTN     | 4,789856 | 3,44E-06  |
| DKK1     | 4,777282 | 7,64E-14  |
| TMEM254- | 4,756818 | 1,15E-07  |
| LYSMD2   | 4,753732 | 5,95E-45  |
| SPATA17  | 4,716789 | 1,61E-23  |
| TSTD1    | 4,713959 | 3,21E-40  |
| MALRD1   | 4,712122 | 1,85E-08  |
| UNC5B    | 4,708758 | 1,76E-08  |
| SLC27A2  | 4,696577 | 1,37E-43  |
| PCDHGA10 | 4,693503 | 0,000136  |
| LDHD     | 4,688177 | 1,24E-06  |
| ZBTB7C   | 4,683896 | 1,81E-05  |
| STXBP6   | 4,673735 | 1,00E-12  |
| FAAH     | 4,670414 | 1,20E-25  |
| ST14     | 4,655744 | 7,33E-47  |
| SELM     | 4,65334  | 1,82E-06  |
| ADM2     | 4,649062 | 5,27E-13  |
| DOCK8    | 4,640511 | 2,91E-08  |
| CLUHP3   | 4,63431  | 0,000381  |
| LYPD6B   | 4,622548 | 2,08E-06  |
| CGREF1   | 4,61558  | 3,78E-28  |
| AEBP1    | 4,609508 | 1,38E-06  |
| ZNF204P  | 4,592671 | 5,89E-06  |
| RNF157   | 4,583556 | 9,30E-11  |

|           |          |           |
|-----------|----------|-----------|
| ISYNA1    | 4,582215 | 7,96E-86  |
| KIF5C     | 4,580017 | 6,71E-06  |
| CALHM2    | 4,562518 | 3,43E-14  |
| MAP10     | 4,55105  | 5,20E-05  |
| CYB561    | 4,543841 | 3,38E-138 |
| PPFIA3    | 4,534016 | 5,17E-35  |
| SH3YL1    | 4,525652 | 1,48E-48  |
| LRRC41    | 4,524694 | 9,98E-27  |
| AIF1L     | 4,521972 | 5,61E-85  |
| STK31     | 4,520906 | 0,000515  |
| GRHL1     | 4,507454 | 3,66E-16  |
| EHF       | 4,503518 | 3,55E-14  |
| LRRC75B   | 4,474299 | 1,88E-15  |
| FRAT1     | 4,459431 | 1,10E-05  |
| MFAP2     | 4,458415 | 1,23E-22  |
| C2orf15   | 4,454452 | 7,33E-30  |
| JHDM1D-A  | 4,452623 | 1,23E-12  |
| EMID1     | 4,452582 | 2,02E-08  |
| NRCAM     | 4,446369 | 4,99E-23  |
| NELL2     | 4,43658  | 0,000326  |
| HIST1H3H  | 4,415333 | 1,16E-05  |
| PCSK1N    | 4,414672 | 1,63E-33  |
| KRT17     | 4,413753 | 5,68E-08  |
| C1orf21   | 4,412862 | 2,34E-13  |
| SEMA4A    | 4,412042 | 7,74E-28  |
| IFITM10   | 4,407075 | 0,000151  |
| MGAT4A    | 4,403843 | 2,08E-19  |
| ERICH2    | 4,394114 | 1,61E-20  |
| RHOB      | 4,393092 | 2,28E-70  |
| RASD1     | 4,392781 | 3,27E-06  |
| KCNJ8     | 4,384684 | 2,81E-50  |
| TRPV3     | 4,378235 | 1,12E-07  |
| LCP1      | 4,374179 | 3,15E-15  |
| IFI30     | 4,371441 | 8,71E-42  |
| ZNF165    | 4,367751 | 3,55E-36  |
| CEMIP     | 4,363461 | 3,99E-16  |
| HOXC13    | 4,360755 | 3,84E-20  |
| ATP1A3    | 4,358551 | 2,02E-15  |
| GPLD1     | 4,358538 | 1,33E-06  |
| ADGRL1    | 4,350616 | 2,11E-104 |
| ZNF879    | 4,350355 | 9,18E-07  |
| EPCAM     | 4,348497 | 2,38E-93  |
| EFHD1     | 4,341371 | 5,25E-19  |
| SEMA6A    | 4,341098 | 2,76E-15  |
| PLEKHA7   | 4,338117 | 9,79E-46  |
| HIST2H2AC | 4,337836 | 0,000259  |
| FBXO15    | 4,335376 | 1,29E-06  |
| ABCC2     | 4,329267 | 2,27E-06  |
| KIAA1211L | 4,324069 | 0,000442  |
| EFNA3     | 4,313914 | 1,07E-26  |

|           |          |          |
|-----------|----------|----------|
| HIST2H2BE | 4,311449 | 5,82E-15 |
| ADAMTS17  | 4,307017 | 3,92E-05 |
| SMPDL3B   | 4,306185 | 1,91E-45 |
| REEP6     | 4,302961 | 3,07E-40 |
| ZBTB42    | 4,293847 | 1,11E-43 |
| C1orf233  | 4,288149 | 6,27E-47 |
| ALDH5A1   | 4,285657 | 4,19E-46 |
| SYT1      | 4,28516  | 4,64E-19 |
| TUB       | 4,277657 | 2,10E-06 |
| STARD10   | 4,273569 | 1,46E-32 |
| CDH18     | 4,267716 | 0,000259 |
| BGN       | 4,264109 | 2,35E-08 |
| S100A4    | 4,255078 | 0,000193 |
| CACNG4    | 4,244274 | 4,27E-26 |
| TP73      | 4,233575 | 1,13E-06 |
| C21orf58  | 4,232305 | 9,91E-17 |
| MARCH1    | 4,22542  | 9,77E-06 |
| ARHGEF16  | 4,221823 | 2,28E-31 |
| YPEL1     | 4,20095  | 4,55E-05 |
| MYH7B     | 4,200136 | 6,69E-06 |
| ASAH2     | 4,191448 | 1,60E-19 |
| RAB3IL1   | 4,154187 | 1,87E-15 |
| PODXL2    | 4,148177 | 1,79E-59 |
| CNKSRI    | 4,141298 | 1,56E-14 |
| C17orf96  | 4,136378 | 1,84E-30 |
| ACKR3     | 4,133332 | 2,76E-53 |
| NCOA3     | 4,132875 | 1,15E-78 |
| ADPRHL1   | 4,130645 | 4,59E-21 |
| HCN2      | 4,110127 | 2,73E-18 |
| PCDHGB2   | 4,109858 | 0,000441 |
| HIST1H2BD | 4,107942 | 3,10E-13 |
| SYT3      | 4,102478 | 6,97E-08 |
| SERPINI1  | 4,09737  | 1,66E-06 |
| FGFR4     | 4,095316 | 8,00E-36 |
| SOX2      | 4,089004 | 2,43E-18 |
| USP32     | 4,077312 | 1,57E-43 |
| RASL11B   | 4,049234 | 2,45E-17 |
| CPLX1     | 4,049026 | 6,17E-16 |
| SAPCD2    | 4,047526 | 6,02E-43 |
| RUNDC3A   | 4,045775 | 1,16E-07 |
| TMEM238   | 4,037224 | 7,41E-15 |
| GRID1     | 4,034844 | 0,000437 |
| RND2      | 4,028203 | 6,86E-15 |
| MAGEH1    | 4,023033 | 1,46E-10 |
| HIST1H2AC | 4,012819 | 1,39E-08 |
| MIR4697H  | 4,012304 | 0,000448 |
| LRRC37A8F | 4,008044 | 6,18E-07 |
| C12orf56  | 3,992825 | 8,64E-12 |
| NANOS1    | 3,990586 | 4,39E-29 |
| SLC27A5   | 3,983608 | 2,97E-32 |

|           |          |          |
|-----------|----------|----------|
| NHLRC1    | 3,967162 | 3,65E-05 |
| CRABP2    | 3,966487 | 1,65E-19 |
| LOC100505 | 3,962591 | 3,03E-07 |
| IMPA2     | 3,95525  | 3,32E-41 |
| AK7       | 3,954617 | 8,15E-42 |
| PCDHA7    | 3,949523 | 4,99E-07 |
| RAB39B    | 3,94817  | 0,000487 |
| SLC15A2   | 3,943918 | 9,93E-06 |
| HIST1H2BK | 3,939591 | 2,36E-13 |
| RMND5B    | 3,93272  | 6,95E-60 |
| ZNF790-AS | 3,931081 | 1,05E-11 |
| MAP2K6    | 3,92919  | 1,97E-07 |
| GABPB1-AS | 3,926283 | 5,05E-16 |
| LINC01006 | 3,892855 | 2,35E-05 |
| SPPL2A    | 3,883393 | 6,51E-57 |
| COL9A3    | 3,883268 | 1,66E-06 |
| WFDC2     | 3,852664 | 0,000862 |
| DGAT2     | 3,84665  | 1,62E-15 |
| MAML3     | 3,843805 | 7,60E-10 |
| SLC16A14  | 3,842402 | 1,06E-07 |
| S1PR3     | 3,842087 | 8,16E-13 |
| IRX3      | 3,836737 | 2,28E-35 |
| IGSF10    | 3,831219 | 0,000138 |
| FOXA1     | 3,830582 | 1,58E-96 |
| SELENBP1  | 3,821968 | 1,68E-39 |
| CLDN4     | 3,821422 | 1,59E-31 |
| FRMD6-AS  | 3,820461 | 3,19E-06 |
| MAPK8IP2  | 3,811875 | 1,19E-10 |
| FMO5      | 3,810205 | 3,81E-05 |
| RNF125    | 3,795984 | 5,75E-06 |
| SLC43A2   | 3,789647 | 1,50E-31 |
| CREB3L4   | 3,787559 | 1,48E-42 |
| MAST1     | 3,780597 | 1,72E-11 |
| SRCIN1    | 3,750903 | 1,48E-06 |
| PCDH1     | 3,732306 | 6,28E-27 |
| HIST1H1C  | 3,73096  | 5,63E-07 |
| FAM78A    | 3,730262 | 0,000104 |
| TTC39A    | 3,729005 | 2,50E-11 |
| RPS6KL1   | 3,719453 | 1,06E-16 |
| GLUD2     | 3,707191 | 2,42E-13 |
| TUBD1     | 3,7046   | 5,19E-33 |
| CEACAM1   | 3,704261 | 3,20E-12 |
| DTWD1     | 3,703059 | 7,70E-29 |
| APPBP2    | 3,700496 | 2,13E-95 |
| PKP3      | 3,698591 | 3,13E-38 |
| COL9A2    | 3,692701 | 6,92E-12 |
| CCDC74B   | 3,672276 | 6,47E-05 |
| PSMG3-AS  | 3,669083 | 6,15E-16 |
| CCDC78    | 3,668795 | 1,00E-06 |
| FAM227B   | 3,666267 | 4,16E-14 |



|           |          |          |
|-----------|----------|----------|
| HOOK2     | 3,665886 | 1,91E-64 |
| IRX5      | 3,662356 | 2,67E-33 |
| RHOBTB1   | 3,662181 | 1,72E-83 |
| PGBD5     | 3,653893 | 1,05E-06 |
| RINL      | 3,64486  | 5,72E-05 |
| ADAMTS13  | 3,618169 | 9,36E-05 |
| FLJ10038  | 3,614934 | 2,75E-21 |
| LENG9     | 3,614481 | 3,34E-26 |
| HS3ST3B1  | 3,598227 | 8,12E-06 |
| NGEF      | 3,597016 | 0,000738 |
| FAM222A   | 3,59608  | 7,41E-31 |
| FA2H      | 3,594132 | 4,05E-06 |
| RNF165    | 3,591736 | 1,01E-07 |
| CXCR4     | 3,579725 | 3,26E-11 |
| CPT1A     | 3,577461 | 1,50E-75 |
| SCML2     | 3,574119 | 1,38E-12 |
| ABCA12    | 3,570582 | 4,20E-18 |
| C19orf81  | 3,564877 | 1,22E-05 |
| TFAP2A    | 3,558483 | 6,22E-94 |
| EDA       | 3,537204 | 6,80E-05 |
| RNF144A   | 3,534372 | 8,02E-15 |
| AGAP2     | 3,526119 | 1,77E-15 |
| SIAH2     | 3,520993 | 6,50E-42 |
| C19orf33  | 3,520213 | 3,30E-15 |
| LINC00960 | 3,515671 | 1,12E-07 |
| TBX2      | 3,511265 | 5,38E-25 |
| LOC283335 | 3,506812 | 2,74E-17 |
| FAM174B   | 3,506803 | 1,12E-12 |
| RASGRF1   | 3,506656 | 2,14E-21 |
| CELSR3    | 3,505649 | 1,88E-22 |
| MYB       | 3,503059 | 8,15E-09 |
| GNG7      | 3,500444 | 1,57E-05 |
| TTC9      | 3,500257 | 2,20E-27 |
| GDPD3     | 3,499187 | 1,71E-05 |
| TCF7L1    | 3,496759 | 3,36E-10 |
| SAMD11    | 3,495837 | 3,96E-07 |
| EML6      | 3,486963 | 2,51E-05 |
| PPFIBP2   | 3,474035 | 3,55E-16 |
| LOC100128 | 3,46098  | 0,00035  |
| ZBTB46    | 3,449533 | 0,000587 |
| RRAGD     | 3,448773 | 7,56E-08 |
| VAV1      | 3,439466 | 6,73E-09 |
| C9orf172  | 3,438607 | 9,72E-06 |
| SLC2A4    | 3,43395  | 1,50E-05 |
| MYL5      | 3,433811 | 3,48E-07 |
| ADGRL2    | 3,433547 | 9,69E-10 |
| P2RY6     | 3,431714 | 0,000382 |
| PRSS22    | 3,431487 | 1,91E-06 |
| PCDHGB1   | 3,426397 | 1,27E-09 |
| TRPS1     | 3,420781 | 1,74E-73 |

|           |          |          |
|-----------|----------|----------|
| TRAPPC6A  | 3,41464  | 8,42E-27 |
| TGM1      | 3,41395  | 0,000202 |
| ANKRD34A  | 3,401497 | 6,84E-11 |
| SLC6A9    | 3,390732 | 6,43E-08 |
| FOXP2     | 3,382397 | 3,14E-05 |
| ZSCAN31   | 3,380589 | 1,26E-15 |
| C7orf13   | 3,379778 | 2,86E-15 |
| STOX1     | 3,375958 | 1,15E-05 |
| PPM1D     | 3,374625 | 8,01E-61 |
| FGFR3     | 3,368207 | 1,18E-19 |
| FAM46B    | 3,364071 | 1,30E-13 |
| MREG      | 3,357187 | 4,77E-36 |
| SOX13     | 3,341751 | 1,72E-17 |
| MFAP3L    | 3,337929 | 7,03E-11 |
| KCNMB4    | 3,329226 | 2,85E-05 |
| IRF6      | 3,327678 | 6,31E-18 |
| TRIM37    | 3,324236 | 1,87E-86 |
| SYT12     | 3,322977 | 3,66E-13 |
| RBPMS2    | 3,318744 | 1,79E-07 |
| DUSP2     | 3,317625 | 3,72E-07 |
| LINC01012 | 3,306756 | 0,00026  |
| CDS1      | 3,296751 | 5,21E-34 |
| GSE1      | 3,291457 | 6,94E-84 |
| MAST4     | 3,291213 | 1,58E-07 |
| SLC9A3R2  | 3,282602 | 1,96E-44 |
| JAG2      | 3,276742 | 3,77E-21 |
| EPB41L5   | 3,27543  | 2,21E-45 |
| BRIP1     | 3,274908 | 5,41E-55 |
| C1QTNF9B  | 3,274016 | 3,67E-11 |
| RNF44     | 3,27153  | 5,68E-47 |
| LCMT2     | 3,267496 | 8,18E-22 |
| OBSCN     | 3,26679  | 3,61E-11 |
| RPS6KB1   | 3,258127 | 2,73E-75 |
| ICOSLG    | 3,257999 | 2,69E-08 |
| LEO1      | 3,257922 | 2,31E-73 |
| TM7SF2    | 3,256218 | 1,02E-14 |
| SYNPO2    | 3,249664 | 1,94E-10 |
| MAPK6     | 3,247095 | 1,72E-75 |
| ZNF497    | 3,242809 | 7,60E-09 |
| VASH2     | 3,238978 | 9,15E-09 |
| PLEKHB1   | 3,237132 | 1,30E-08 |
| JMY       | 3,229979 | 1,64E-08 |
| ZNF433    | 3,226089 | 1,43E-12 |
| USP8      | 3,225557 | 2,00E-64 |
| LRRC37A3  | 3,224642 | 1,00E-06 |
| PLEKHG6   | 3,222883 | 2,68E-08 |
| ZNF354A   | 3,217498 | 2,58E-22 |
| GPC2      | 3,216181 | 8,61E-07 |
| MZF1-AS1  | 3,211841 | 1,10E-07 |
| TSPAN13   | 3,207037 | 4,11E-37 |

|           |          |          |
|-----------|----------|----------|
| ZP3       | 3,202662 | 5,77E-25 |
| CRTC1     | 3,196219 | 1,10E-32 |
| CGN       | 3,196044 | 1,53E-30 |
| MAP7      | 3,195099 | 1,85E-45 |
| HEYL      | 3,185108 | 0,000491 |
| ZSCAN16   | 3,182325 | 3,66E-21 |
| SMA4      | 3,181908 | 0,000183 |
| RALGPS1   | 3,175    | 3,07E-18 |
| RSPH1     | 3,17404  | 0,000222 |
| HEATR6    | 3,168136 | 1,17E-59 |
| DGKE      | 3,16313  | 1,80E-11 |
| LINC01004 | 3,157075 | 9,68E-08 |
| DBP       | 3,151616 | 1,28E-21 |
| FAM102B   | 3,151221 | 6,95E-46 |
| SULT1A1   | 3,148429 | 2,94E-06 |
| C6orf52   | 3,143871 | 9,78E-06 |
| RTN1      | 3,128605 | 0,000793 |
| AP4E1     | 3,126384 | 1,58E-30 |
| XBP1      | 3,122667 | 2,56E-14 |
| FAM214A   | 3,122186 | 4,53E-08 |
| RAB11FIP4 | 3,11974  | 1,99E-38 |
| CFAP44    | 3,114629 | 0,000233 |
| TSPAN33   | 3,112764 | 8,98E-13 |
| USP18     | 3,102776 | 4,38E-07 |
| C12orf57  | 3,089241 | 1,33E-24 |
| PDCD4     | 3,086742 | 1,30E-31 |
| DUSP9     | 3,08674  | 2,58E-09 |
| ACSS3     | 3,0833   | 4,17E-57 |
| KLF5      | 3,077283 | 3,90E-47 |
| PREX1     | 3,071571 | 5,07E-33 |
| RASSF5    | 3,063677 | 0,000599 |
| LOC100134 | 3,062947 | 0,000762 |
| LEF1      | 3,062295 | 1,10E-24 |
| PIK3C2B   | 3,047819 | 1,26E-30 |
| ATP6V1C2  | 3,043943 | 1,73E-12 |
| CAMK2N2   | 3,04044  | 5,16E-13 |
| GRIN2D    | 3,039382 | 1,04E-06 |
| PRDX2     | 3,038257 | 3,79E-51 |
| ADAM22    | 3,038242 | 1,34E-16 |
| TNFRSF19  | 3,034088 | 1,10E-33 |
| DLL1      | 3,033533 | 0,00043  |
| FOS       | 3,026324 | 0,00025  |
| NUDT8     | 3,02555  | 7,41E-15 |
| C14orf169 | 3,022917 | 2,11E-19 |
| TMEM216   | 3,018865 | 8,56E-10 |
| DHRS13    | 3,017365 | 2,38E-18 |
| BOLA1     | 3,017251 | 5,12E-24 |
| SEMA3F    | 3,012534 | 4,11E-25 |
| ZCCHC12   | 3,009224 | 0,000266 |
| SLC22A17  | 3,008271 | 3,61E-05 |

|                       |          |          |
|-----------------------|----------|----------|
| GSTZ1                 | 3,006892 | 4,91E-37 |
| LHX2                  | 2,985015 | 0,000308 |
| TNRC6C                | 2,981762 | 1,49E-37 |
| PITPNC1               | 2,979948 | 4,35E-52 |
| TPBG                  | 2,978153 | 1,61E-43 |
| C1orf115              | 2,975455 | 4,95E-12 |
| KCNK6                 | 2,974521 | 1,52E-10 |
| MROH6                 | 2,974014 | 2,67E-11 |
| VPS9D1-AS             | 2,972787 | 4,06E-32 |
| GJA3                  | 2,970489 | 9,15E-08 |
| DAAM1                 | 2,968514 | 3,06E-33 |
| GAD1                  | 2,96292  | 9,61E-13 |
| PCDH18                | 2,959993 | 1,15E-06 |
| LRRC24                | 2,959435 | 4,11E-06 |
| DYRK1B                | 2,957247 | 1,00E-25 |
| GGT1                  | 2,956185 | 1,94E-18 |
| ARHGEF19              | 2,952293 | 1,82E-15 |
| CASKIN1               | 2,951793 | 1,67E-11 |
| ACBD7                 | 2,947091 | 7,75E-14 |
| ST8SIA4               | 2,93774  | 4,54E-06 |
| TGFB3                 | 2,923492 | 0,000619 |
| PFDN4                 | 2,922798 | 4,49E-64 |
| PDE4DIP               | 2,921863 | 8,77E-19 |
| AMH                   | 2,901752 | 4,09E-05 |
| HOXC-AS3              | 2,896669 | 0,00021  |
| NPDC1                 | 2,888749 | 6,14E-50 |
| IGFBP5                | 2,888261 | 3,77E-14 |
| PIK3R3                | 2,885542 | 1,75E-16 |
| HCG11                 | 2,879715 | 8,39E-13 |
| TRPM7                 | 2,876323 | 2,73E-59 |
| A1BG-AS1              | 2,873333 | 4,22E-09 |
| LAGE3                 | 2,871279 | 1,97E-34 |
| TOB2P1                | 2,870313 | 0,000615 |
| CAMK2B                | 2,862869 | 1,20E-08 |
| SERINC5               | 2,860044 | 4,78E-18 |
| SDHAF1                | 2,851624 | 2,26E-17 |
| GSG1L                 | 2,849657 | 4,99E-05 |
| CSAD                  | 2,847382 | 1,62E-08 |
| HECW2                 | 2,846463 | 8,41E-12 |
| KRT8                  | 2,845808 | 2,26E-18 |
| KLHDC9                | 2,837808 | 5,01E-05 |
| RABL2A                | 2,837319 | 5,88E-06 |
| BCAS2                 | 2,836136 | 2,41E-62 |
| P2RY2                 | 2,831311 | 5,58E-20 |
| IGSF5                 | 2,828348 | 0,000143 |
| MAP3K14- <del>l</del> | 2,826681 | 1,43E-07 |
| FUT8-AS1              | 2,826678 | 5,97E-05 |
| A1BG                  | 2,826123 | 1,53E-06 |
| MDM4                  | 2,822768 | 4,89E-17 |
| RAD51C                | 2,81663  | 2,42E-50 |

|          |          |          |
|----------|----------|----------|
| CABYR    | 2,814396 | 7,97E-06 |
| PAIP2B   | 2,81391  | 2,37E-12 |
| CNIH2    | 2,813232 | 2,73E-12 |
| ALDH3A2  | 2,806942 | 1,49E-52 |
| PAX8-AS1 | 2,798683 | 2,48E-13 |
| SMIM14   | 2,795273 | 3,14E-07 |
| LOC90784 | 2,794811 | 5,03E-30 |
| HSD3B7   | 2,789312 | 6,75E-30 |
| RAB3A    | 2,782729 | 1,21E-06 |
| ZBTB12   | 2,77781  | 7,25E-09 |
| RNF122   | 2,773511 | 2,86E-12 |
| PSMD6    | 2,770866 | 1,09E-43 |
| G6PD     | 2,769616 | 3,26E-06 |
| SUV420H2 | 2,767876 | 1,39E-16 |
| KALRN    | 2,76395  | 2,16E-06 |
| RTN4R    | 2,761517 | 2,42E-10 |
| BSN      | 2,759337 | 0,000247 |
| GLUL     | 2,756833 | 4,97E-71 |
| C10orf35 | 2,75194  | 3,63E-08 |
| CSPG5    | 2,751609 | 1,48E-07 |
| LAMP3    | 2,750296 | 0,000201 |
| CLU      | 2,745295 | 9,50E-13 |
| ABCB6    | 2,744693 | 3,16E-18 |
| PCAT7    | 2,743471 | 3,56E-05 |
| KCNS3    | 2,739181 | 0,00053  |
| SDHAP2   | 2,733153 | 5,78E-08 |
| NXPH4    | 2,728804 | 1,58E-21 |
| SLC48A1  | 2,71683  | 7,51E-10 |
| SPIRE2   | 2,714698 | 1,85E-07 |
| HSD11B2  | 2,70515  | 7,69E-08 |
| LONRF2   | 2,703525 | 5,38E-10 |
| SHF      | 2,69968  | 1,41E-06 |
| ACTL10   | 2,690634 | 2,67E-05 |
| KNDC1    | 2,687612 | 0,000109 |
| OSR2     | 2,679434 | 4,73E-07 |
| DENND2C  | 2,674613 | 0,000175 |
| CACFD1   | 2,672958 | 1,28E-16 |
| RNF208   | 2,672209 | 1,65E-14 |
| DMXL2    | 2,668567 | 8,17E-34 |
| EPB41L4B | 2,666593 | 7,94E-20 |
| DDIT4L   | 2,666255 | 2,13E-07 |
| YBEY     | 2,665017 | 8,22E-07 |
| ZNF703   | 2,660797 | 2,89E-34 |
| C22orf46 | 2,646439 | 1,06E-16 |
| ZNF397   | 2,638027 | 6,99E-15 |
| DDAH2    | 2,633352 | 3,80E-23 |
| MARVELD2 | 2,632863 | 1,05E-15 |
| SLC26A11 | 2,631401 | 2,67E-09 |
| PRSS16   | 2,62947  | 1,55E-09 |
| DCXR     | 2,628687 | 6,81E-36 |

|            |          |          |
|------------|----------|----------|
| SMKR1      | 2,627022 | 1,47E-09 |
| MYLIP      | 2,623517 | 1,90E-17 |
| SH3BP5     | 2,62265  | 7,88E-41 |
| RNASEL     | 2,614255 | 7,57E-13 |
| SIGIRR     | 2,604935 | 1,93E-23 |
| KRT18      | 2,597355 | 2,74E-12 |
| MEX3A      | 2,594273 | 1,82E-52 |
| KLHDC2     | 2,594211 | 5,92E-15 |
| FAM69B     | 2,591689 | 2,71E-06 |
| B3GNT4     | 2,590538 | 3,32E-05 |
| TXNIP      | 2,589387 | 3,74E-05 |
| TFR2       | 2,585652 | 2,68E-05 |
| TSPAN15    | 2,5849   | 1,79E-13 |
| SESN3      | 2,582043 | 5,23E-05 |
| PANX2      | 2,5808   | 0,000466 |
| PRICKLE2-A | 2,580566 | 0,000521 |
| CRYL1      | 2,577968 | 2,65E-19 |
| ZNF385A    | 2,576257 | 9,84E-33 |
| PRMT6      | 2,573421 | 3,48E-45 |
| ICA1       | 2,573333 | 4,52E-18 |
| MED12L     | 2,572764 | 3,31E-07 |
| MSX2       | 2,572078 | 2,32E-15 |
| EDN1       | 2,568117 | 7,43E-07 |
| CENPBD1    | 2,565132 | 5,09E-17 |
| GABPB1     | 2,562733 | 3,52E-21 |
| ETS2       | 2,560641 | 1,21E-25 |
| COBL       | 2,56013  | 1,18E-10 |
| HEIH       | 2,555355 | 5,01E-10 |
| PLEKHF2    | 2,549929 | 1,65E-31 |
| EGFL7      | 2,543019 | 9,21E-17 |
| SLC29A3    | 2,541892 | 2,50E-09 |
| SALL4      | 2,538152 | 3,43E-06 |
| TLCD1      | 2,526538 | 2,84E-27 |
| ZNF793     | 2,522245 | 1,25E-11 |
| GPR153     | 2,513291 | 2,33E-12 |
| CXCL16     | 2,513202 | 3,68E-13 |
| GCH1       | 2,510149 | 2,13E-16 |
| ZMIZ1      | 2,509308 | 6,02E-23 |
| PTGES      | 2,501548 | 1,07E-05 |
| WDR83      | 2,499766 | 1,66E-18 |
| SOX4       | 2,497254 | 1,23E-30 |
| IQCH-AS1   | 2,496979 | 5,43E-12 |
| TMOD3      | 2,496762 | 4,08E-46 |
| LNX2       | 2,487886 | 6,04E-31 |
| FRAS1      | 2,487232 | 6,48E-14 |
| TEAD2      | 2,485486 | 6,62E-19 |
| ADRBK2     | 2,485228 | 5,91E-10 |
| SCAMP5     | 2,484553 | 2,55E-07 |
| ISM1       | 2,482841 | 0,000125 |
| ZBED9      | 2,481031 | 1,44E-07 |

|           |          |          |
|-----------|----------|----------|
| TMEM183F  | 2,478751 | 1,29E-10 |
| CCDC57    | 2,475797 | 2,66E-15 |
| ENPP5     | 2,475242 | 8,16E-05 |
| KIAA1211  | 2,474011 | 7,65E-10 |
| ISOC2     | 2,472649 | 7,82E-41 |
| NPW       | 2,471566 | 0,000428 |
| TLCD2     | 2,470805 | 5,40E-07 |
| KBTBD7    | 2,468439 | 1,98E-13 |
| FAM110A   | 2,467388 | 2,46E-09 |
| FUOM      | 2,46705  | 3,71E-09 |
| SP6       | 2,457958 | 1,24E-10 |
| FAM171A2  | 2,450381 | 2,40E-27 |
| ARRDC4    | 2,449157 | 8,08E-08 |
| NIPAL2    | 2,447387 | 1,91E-08 |
| CASKIN2   | 2,445484 | 2,56E-27 |
| NAT8L     | 2,437331 | 6,71E-12 |
| KIAA1324L | 2,434519 | 1,51E-21 |
| ITPK1     | 2,434229 | 2,37E-35 |
| ZNF253    | 2,4339   | 1,00E-19 |
| SLC39A4   | 2,430337 | 3,02E-15 |
| LIN7B     | 2,42938  | 1,62E-05 |
| TMEM52    | 2,427843 | 0,000281 |
| SLC4A8    | 2,423074 | 0,0003   |
| ATXN7L2   | 2,421176 | 3,47E-10 |
| RLTPR     | 2,419231 | 0,000463 |
| PPCDC     | 2,416785 | 6,26E-11 |
| TET3      | 2,415168 | 7,96E-40 |
| TRIM36    | 2,415055 | 1,16E-14 |
| FRAT2     | 2,414768 | 1,41E-08 |
| TRPM4     | 2,41275  | 6,34E-23 |
| LSR       | 2,40489  | 2,85E-26 |
| ZNF239    | 2,400309 | 2,33E-05 |
| PNRC1     | 2,396631 | 8,23E-16 |
| PLEKHH1   | 2,395303 | 1,25E-20 |
| DNASE2    | 2,39137  | 1,02E-30 |
| NHP2      | 2,389932 | 6,32E-49 |
| BAHCC1    | 2,38761  | 2,43E-05 |
| MTIF3     | 2,386428 | 1,31E-17 |
| SMAD6     | 2,384647 | 8,49E-07 |
| KRBA2     | 2,38447  | 0,000896 |
| B4GALNT4  | 2,383864 | 1,31E-09 |
| TMC6      | 2,383427 | 3,18E-15 |
| MDH2      | 2,382753 | 1,56E-32 |
| TMEM44-A  | 2,381935 | 0,000149 |
| MEST      | 2,381458 | 1,69E-41 |
| ZNF711    | 2,380725 | 1,62E-10 |
| BLVRB     | 2,375308 | 1,89E-10 |
| LPAR2     | 2,371817 | 2,32E-27 |
| RAC3      | 2,362147 | 3,89E-15 |
| ZNF737    | 2,352056 | 2,17E-07 |

|           |          |          |
|-----------|----------|----------|
| C5        | 2,348149 | 6,04E-06 |
| CCDC71L   | 2,346679 | 7,81E-08 |
| SH2D3A    | 2,341491 | 1,83E-06 |
| MPND      | 2,341477 | 7,27E-16 |
| CSDE1     | 2,341375 | 7,42E-27 |
| FAM53B    | 2,34105  | 1,26E-36 |
| ALKBH2    | 2,340665 | 3,30E-18 |
| ZSWIM7    | 2,340525 | 1,61E-13 |
| ZNF391    | 2,336516 | 0,000597 |
| RCOR2     | 2,335875 | 7,01E-06 |
| ANO8      | 2,334518 | 3,78E-12 |
| ZFP14     | 2,331344 | 6,82E-09 |
| SLC29A2   | 2,327156 | 2,82E-14 |
| IL17RE    | 2,318659 | 0,000279 |
| SEMA4C    | 2,317932 | 1,06E-17 |
| ZNF32     | 2,308615 | 1,39E-16 |
| ZNF630    | 2,308412 | 2,83E-05 |
| MEPCE     | 2,308175 | 5,16E-49 |
| UFSP1     | 2,307231 | 0,000298 |
| C21orf33  | 2,304218 | 8,54E-18 |
| UBE2Q2P2  | 2,30392  | 0,000251 |
| ZNF217    | 2,300805 | 3,51E-41 |
| MNX1      | 2,299428 | 1,98E-10 |
| C2orf76   | 2,298511 | 3,20E-05 |
| TMEM121   | 2,296943 | 0,000442 |
| ENDOV     | 2,294306 | 6,39E-14 |
| ZNF836    | 2,291937 | 1,82E-10 |
| JUNB      | 2,291179 | 3,05E-09 |
| GGACT     | 2,290097 | 0,00011  |
| DHTKD1    | 2,282393 | 3,24E-24 |
| TRIM24    | 2,280655 | 1,97E-27 |
| FBLIM1    | 2,279257 | 1,92E-05 |
| SYNE2     | 2,272688 | 6,59E-16 |
| VSIG10L   | 2,272142 | 2,18E-08 |
| LMF1      | 2,271141 | 3,67E-09 |
| KATNAL2   | 2,27009  | 6,11E-05 |
| TDRKH     | 2,269986 | 1,23E-08 |
| ECE2      | 2,268901 | 2,53E-10 |
| MBNL3     | 2,266239 | 4,01E-24 |
| PYCR1     | 2,265347 | 9,01E-20 |
| LINC00886 | 2,263939 | 0,000222 |
| MRPL41    | 2,262427 | 7,15E-26 |
| GLS2      | 2,260062 | 4,95E-06 |
| AP1M2     | 2,258509 | 4,35E-24 |
| WDR83OS   | 2,258252 | 7,73E-33 |
| FAM134B   | 2,256528 | 1,91E-05 |
| HSPA2     | 2,255231 | 9,21E-05 |
| MAFG-AS1  | 2,254798 | 1,21E-05 |
| B3GNT3    | 2,2536   | 0,00032  |
| NIPBL-AS1 | 2,252857 | 7,89E-09 |



|                        |          |          |
|------------------------|----------|----------|
| MOAP1                  | 2,252822 | 4,82E-13 |
| SPATA2L                | 2,252664 | 6,48E-16 |
| PCDHB2                 | 2,251345 | 6,66E-12 |
| HS6ST1                 | 2,249424 | 2,87E-23 |
| NPY1R                  | 2,246735 | 7,05E-11 |
| AUTS2                  | 2,244529 | 2,50E-17 |
| GSTM4                  | 2,241635 | 2,20E-17 |
| CCT6B                  | 2,241038 | 0,000264 |
| CAMSAP3                | 2,239875 | 1,65E-22 |
| CELSR2                 | 2,238995 | 3,40E-23 |
| SLC7A5                 | 2,233229 | 1,86E-32 |
| ZFP62                  | 2,232677 | 4,16E-29 |
| KDM7A                  | 2,230303 | 2,66E-12 |
| GLCE                   | 2,228967 | 3,84E-27 |
| SMARCD2                | 2,228314 | 1,55E-40 |
| ZNF232                 | 2,222564 | 9,56E-07 |
| TAF11                  | 2,220905 | 4,08E-22 |
| ONECUT2                | 2,219912 | 2,11E-11 |
| SFT2D3                 | 2,211349 | 6,17E-08 |
| FAM212B                | 2,210973 | 3,41E-06 |
| TNS2                   | 2,210437 | 3,30E-12 |
| LIPT2                  | 2,20881  | 8,75E-05 |
| TRIM33                 | 2,20505  | 2,39E-28 |
| CCDC88C                | 2,203548 | 6,09E-11 |
| MXD4                   | 2,201948 | 1,64E-07 |
| TET2                   | 2,198468 | 6,42E-21 |
| ULK3                   | 2,192532 | 3,16E-14 |
| HIPK1                  | 2,190295 | 5,41E-31 |
| H1FO                   | 2,188784 | 1,61E-06 |
| TMEM251                | 2,187755 | 4,70E-18 |
| LOC100996              | 2,186116 | 0,000221 |
| TEAD3                  | 2,185564 | 2,60E-14 |
| DNLZ                   | 2,183937 | 1,47E-18 |
| WRB                    | 2,178134 | 1,40E-13 |
| HAGHL                  | 2,176627 | 2,71E-13 |
| ARPP19                 | 2,175136 | 1,46E-35 |
| IL17RB                 | 2,172556 | 7,66E-05 |
| RNASEH2A               | 2,171704 | 5,85E-29 |
| EN2                    | 2,167564 | 1,16E-06 |
| ZNF276                 | 2,16697  | 1,25E-17 |
| MCM3AP- <del>l</del>   | 2,164452 | 1,01E-07 |
| EPB41L4A- <del>l</del> | 2,163602 | 4,38E-07 |
| AXIN2                  | 2,163132 | 2,24E-27 |
| ASPSCR1                | 2,158787 | 1,24E-21 |
| TMEM183 <del>l</del>   | 2,158763 | 6,64E-30 |
| TMEM184 <del>l</del>   | 2,155808 | 4,46E-07 |
| IDUA                   | 2,154566 | 2,36E-06 |
| DDR1                   | 2,146472 | 1,03E-07 |
| AGAP9                  | 2,144319 | 0,000521 |
| SLC7A8                 | 2,14416  | 1,68E-06 |

|           |          |          |
|-----------|----------|----------|
| PER3      | 2,133599 | 9,26E-05 |
| CBX4      | 2,132729 | 7,65E-07 |
| AIM1      | 2,13118  | 3,74E-07 |
| ZNF713    | 2,126988 | 3,72E-07 |
| POLR3C    | 2,121657 | 9,39E-09 |
| RALGAPA1  | 2,11858  | 3,71E-19 |
| SPTBN2    | 2,11775  | 3,47E-13 |
| C15orf39  | 2,117    | 2,76E-24 |
| JDP2      | 2,113403 | 8,69E-05 |
| ZNF137P   | 2,112793 | 0,000472 |
| CTXN1     | 2,110894 | 2,15E-16 |
| ZNRF2     | 2,110482 | 3,83E-10 |
| SAMD15    | 2,110305 | 0,000579 |
| VPS72     | 2,109258 | 8,22E-13 |
| AREG      | 2,108719 | 6,29E-06 |
| ZNF682    | 2,108461 | 1,70E-06 |
| C2orf68   | 2,103768 | 2,02E-21 |
| HMGB3     | 2,103521 | 1,48E-37 |
| HES6      | 2,102407 | 7,91E-05 |
| MZF1      | 2,1024   | 0,000251 |
| LOC728554 | 2,100545 | 1,10E-11 |
| WDR34     | 2,093554 | 2,37E-34 |
| KCNK1     | 2,093245 | 4,90E-07 |
| EFNA4     | 2,092331 | 5,76E-16 |
| PHLPP1    | 2,090378 | 5,27E-19 |
| NES       | 2,089661 | 6,51E-08 |
| DSP       | 2,087628 | 1,62E-26 |
| LOC728613 | 2,087552 | 4,44E-05 |
| LOXL3     | 2,085424 | 7,45E-06 |
| ZCWPW1    | 2,083027 | 1,32E-06 |
| PPP1R3F   | 2,077444 | 1,55E-05 |
| SLC37A1   | 2,072089 | 6,12E-06 |
| RANBP17   | 2,067143 | 7,37E-07 |
| SCAND2P   | 2,066415 | 0,000518 |
| ZFYVE19   | 2,060477 | 7,75E-14 |
| DCLRE1B   | 2,060127 | 9,33E-16 |
| SETDB1    | 2,059031 | 1,88E-19 |
| ZC3H8     | 2,058472 | 2,03E-06 |
| DNPH1     | 2,054215 | 1,42E-27 |
| ZNF74     | 2,053554 | 9,77E-17 |
| COX6C     | 2,051815 | 2,24E-24 |
| HIGD2A    | 2,045639 | 2,21E-32 |
| THOC6     | 2,044359 | 1,86E-09 |
| CRB3      | 2,041261 | 4,04E-06 |
| NMB       | 2,041243 | 1,40E-07 |
| AHR       | 2,039354 | 3,64E-27 |
| ALDH4A1   | 2,038374 | 0,000256 |
| SNHG25    | 2,036844 | 2,68E-08 |
| TET1      | 2,033618 | 1,99E-05 |
| ENSA      | 2,030845 | 7,81E-37 |

|           |          |          |
|-----------|----------|----------|
| ST20      | 2,030552 | 5,06E-05 |
| ROGDI     | 2,030395 | 8,37E-16 |
| DBNDD1    | 2,028349 | 7,77E-18 |
| TCEA3     | 2,027118 | 7,71E-19 |
| MC1R      | 2,025978 | 4,39E-06 |
| ZNF687    | 2,024515 | 1,94E-28 |
| TBC1D9    | 2,02346  | 1,79E-17 |
| SIPA1L2   | 2,022969 | 1,69E-15 |
| RABIF     | 2,022271 | 9,34E-17 |
| TMEM141   | 2,018944 | 3,02E-22 |
| SAYS1     | 2,01787  | 2,86E-16 |
| GABPB2    | 2,016853 | 3,68E-09 |
| SRD5A3    | 2,009213 | 4,35E-13 |
| PXN-AS1   | 2,007676 | 1,76E-07 |
| ABHD11    | 2,007575 | 3,97E-14 |
| ZNF829    | 2,007343 | 2,22E-08 |
| MPC1      | 2,005527 | 1,19E-06 |
| CCNG2     | 2,004081 | 8,68E-06 |
| LOC101927 | 2,003296 | 1,75E-05 |
| ECH1      | 2,002881 | 9,33E-17 |
| ZNF572    | 1,994035 | 5,19E-05 |
| PDE4A     | 1,993362 | 3,85E-06 |
| THEM6     | 1,9929   | 3,66E-17 |
| CCDC121   | 1,986166 | 0,000601 |
| ABCA2     | 1,985621 | 1,88E-12 |
| SEPW1     | 1,984439 | 5,29E-10 |
| MIR600HG  | 1,982662 | 2,81E-05 |
| KREMEN1   | 1,976824 | 1,18E-12 |
| ELOVL7    | 1,975195 | 6,71E-13 |
| LOC100506 | 1,973964 | 1,17E-05 |
| VWA1      | 1,968207 | 4,82E-08 |
| ZNRF3     | 1,960734 | 1,02E-29 |
| ZNF595    | 1,960423 | 7,60E-10 |
| ZNF48     | 1,959576 | 6,31E-06 |
| POGZ      | 1,957371 | 4,98E-12 |
| SIKE1     | 1,956016 | 8,85E-26 |
| DDX59     | 1,954075 | 1,80E-06 |
| GUCY1A2   | 1,953944 | 7,28E-09 |
| PDE4D     | 1,95343  | 2,24E-06 |
| IPO5P1    | 1,951811 | 1,63E-06 |
| STRA13    | 1,951806 | 4,64E-21 |
| FAM86EP   | 1,951769 | 2,38E-05 |
| ERV3-1    | 1,949722 | 3,83E-09 |
| MANSC1    | 1,94751  | 6,37E-06 |
| MSRB2     | 1,946047 | 3,80E-16 |
| COA5      | 1,945783 | 7,74E-13 |
| FBXW9     | 1,944484 | 9,13E-15 |
| RBM8A     | 1,943696 | 2,37E-27 |
| IGFLR1    | 1,942304 | 0,00038  |
| GPR160    | 1,935428 | 4,00E-06 |

|            |          |          |
|------------|----------|----------|
| SNAPC5     | 1,934273 | 8,01E-12 |
| CCPG1      | 1,929971 | 3,25E-10 |
| IDNK       | 1,929051 | 7,77E-07 |
| KDM6B      | 1,928833 | 5,56E-18 |
| PRKCH      | 1,928279 | 4,38E-08 |
| KDM5B      | 1,92559  | 3,30E-11 |
| APRT       | 1,922983 | 1,31E-29 |
| ZBTB7B     | 1,922673 | 5,11E-23 |
| ZNRF1      | 1,919419 | 5,26E-22 |
| PITPNA-AS1 | 1,918554 | 0,000148 |
| EMP2       | 1,916966 | 8,75E-10 |
| FLJ37453   | 1,916827 | 0,000521 |
| LYSMD1     | 1,914946 | 7,37E-11 |
| RNF115     | 1,912538 | 4,20E-22 |
| FKBPL      | 1,911745 | 1,36E-10 |
| ADI1       | 1,907981 | 4,48E-20 |
| ZNF117     | 1,907665 | 9,95E-10 |
| FBXW4      | 1,906891 | 9,61E-14 |
| MAPK8IP1   | 1,901347 | 8,55E-13 |
| GAS5       | 1,900394 | 4,56E-05 |
| ZSCAN29    | 1,899377 | 2,36E-09 |
| PRR19      | 1,898526 | 0,00046  |
| C16orf46   | 1,898082 | 8,20E-06 |
| CCDC24     | 1,89647  | 3,44E-05 |
| ISL2       | 1,8955   | 0,00029  |
| ZFH3       | 1,895056 | 2,93E-21 |
| MTL5       | 1,893583 | 1,99E-06 |
| TSEN54     | 1,893139 | 1,72E-15 |
| ANKRD16    | 1,889692 | 3,28E-06 |
| NSUN7      | 1,888577 | 3,25E-05 |
| OBFC1      | 1,888482 | 5,88E-07 |
| EVPL       | 1,884409 | 1,01E-13 |
| C14orf80   | 1,8824   | 2,16E-15 |
| ZSCAN21    | 1,882254 | 3,79E-14 |
| FZD1       | 1,87683  | 4,48E-13 |
| TST        | 1,872894 | 1,15E-06 |
| PACS2      | 1,869821 | 1,28E-21 |
| CBX8       | 1,869051 | 6,75E-07 |
| OCLN       | 1,865536 | 6,19E-07 |
| C6orf48    | 1,86144  | 1,66E-05 |
| PARD6B     | 1,85881  | 9,91E-22 |
| ATP6V1E2   | 1,858808 | 0,000551 |
| C9orf16    | 1,858239 | 2,42E-12 |
| ETNK2      | 1,857154 | 4,93E-06 |
| ZNF43      | 1,85598  | 7,47E-17 |
| PWWP2B     | 1,855338 | 2,99E-14 |
| METRNL     | 1,854535 | 9,53E-14 |
| ZFAS1      | 1,853275 | 0,000629 |
| HOMER2     | 1,850528 | 3,79E-15 |
| C3orf14    | 1,850205 | 2,93E-13 |

|           |          |          |
|-----------|----------|----------|
| TNPO2     | 1,84809  | 3,80E-08 |
| ADAL      | 1,845786 | 3,66E-07 |
| SPINT2    | 1,843521 | 3,54E-27 |
| ATAD2B    | 1,842863 | 2,26E-07 |
| PATZ1     | 1,8419   | 3,88E-11 |
| PGM2L1    | 1,841595 | 2,43E-10 |
| CSK       | 1,839011 | 7,48E-10 |
| GABBR1    | 1,834992 | 4,37E-05 |
| KLF4      | 1,833229 | 7,15E-07 |
| OARD1     | 1,833143 | 4,37E-13 |
| RHOD      | 1,830081 | 1,71E-06 |
| GLI4      | 1,828022 | 6,02E-06 |
| PCOLCE    | 1,827466 | 7,55E-05 |
| PP7080    | 1,827343 | 3,14E-10 |
| PSMD5-AS: | 1,826244 | 3,31E-06 |
| GBAP1     | 1,825275 | 7,88E-06 |
| C8orf82   | 1,825195 | 3,08E-13 |
| THNSL2    | 1,823537 | 4,05E-05 |
| HDAC5     | 1,82076  | 2,15E-06 |
| ABCD1     | 1,818409 | 0,00057  |
| SLC50A1   | 1,818105 | 1,41E-16 |
| ZNF252P   | 1,814197 | 1,09E-17 |
| OGDHL     | 1,813466 | 7,63E-07 |
| RAB27B    | 1,811788 | 1,22E-08 |
| ARG2      | 1,811146 | 0,000147 |
| COX5B     | 1,808161 | 2,99E-25 |
| TPRN      | 1,807805 | 2,97E-11 |
| NQO2      | 1,805988 | 5,96E-15 |
| ASNS      | 1,805845 | 1,52E-05 |
| PLEKHO1   | 1,805004 | 6,22E-16 |
| EPHX2     | 1,804143 | 0,000635 |
| COMTD1    | 1,801942 | 3,08E-11 |
| ZNF627    | 1,801036 | 3,28E-13 |
| WWOX      | 1,797486 | 3,05E-09 |
| SCD5      | 1,788683 | 2,56E-07 |
| LRRC75A-A | 1,782981 | 9,87E-08 |
| CYTH2     | 1,781121 | 2,75E-19 |
| PLEKHH3   | 1,780553 | 0,000303 |
| HDDC3     | 1,778903 | 1,48E-08 |
| CYP2J2    | 1,776492 | 4,22E-05 |
| ZFAND2A   | 1,775403 | 6,32E-08 |
| SPATC1L   | 1,774551 | 4,32E-05 |
| ATXN7L3B  | 1,77364  | 1,10E-28 |
| TMEM254   | 1,772268 | 1,09E-11 |
| GPR89B    | 1,772157 | 7,47E-05 |
| ZNF3      | 1,771917 | 5,85E-16 |
| PCBD2     | 1,771361 | 1,58E-05 |
| SLC25A10  | 1,770013 | 1,24E-19 |
| PPM1L     | 1,769984 | 0,000267 |
| SLC22A18  | 1,767483 | 3,14E-06 |

|          |          |          |
|----------|----------|----------|
| PAQR4    | 1,767117 | 3,08E-22 |
| DLD      | 1,767111 | 2,57E-10 |
| TRAF4    | 1,76566  | 1,07E-23 |
| E2F2     | 1,763265 | 0,000663 |
| TACO1    | 1,763086 | 2,39E-23 |
| FAM171B  | 1,761884 | 1,27E-08 |
| ALDH6A1  | 1,760956 | 1,25E-14 |
| ZIC1     | 1,758828 | 1,28E-05 |
| RSBN1    | 1,753511 | 6,99E-11 |
| NOL3     | 1,751978 | 9,09E-10 |
| KCTD15   | 1,751904 | 4,64E-05 |
| JARID2   | 1,751395 | 1,76E-18 |
| RHPN1    | 1,749609 | 2,74E-09 |
| ZNF184   | 1,749495 | 2,40E-12 |
| TDG      | 1,74883  | 1,82E-21 |
| PNPLA8   | 1,746555 | 3,81E-05 |
| ATXN7L1  | 1,7454   | 2,82E-08 |
| PTPRU    | 1,744021 | 1,29E-09 |
| PSD4     | 1,743549 | 8,26E-10 |
| NFYA     | 1,737901 | 3,80E-11 |
| ZNF287   | 1,73742  | 3,27E-05 |
| HARS2    | 1,736682 | 2,24E-17 |
| CBLL1    | 1,734769 | 2,10E-16 |
| MZT2B    | 1,734738 | 4,34E-12 |
| NAPG     | 1,733509 | 2,84E-09 |
| ZNF821   | 1,729042 | 2,22E-05 |
| SLC16A13 | 1,728545 | 0,000528 |
| CREG1    | 1,726799 | 4,21E-15 |
| SMG7     | 1,725565 | 6,84E-25 |
| NUDT14   | 1,725548 | 4,04E-12 |
| ARHGEF35 | 1,72518  | 0,000143 |
| EPHB4    | 1,723866 | 3,38E-27 |
| NUDT3    | 1,722233 | 8,96E-08 |
| PLXDC2   | 1,72149  | 6,77E-08 |
| RPP40    | 1,719833 | 2,68E-10 |
| UBE2T    | 1,719245 | 9,73E-16 |
| RAB3IP   | 1,715905 | 5,40E-19 |
| ALDH16A1 | 1,715161 | 2,35E-12 |
| ZNF786   | 1,713578 | 3,65E-13 |
| RAB15    | 1,711611 | 6,98E-13 |
| GALNT18  | 1,709604 | 0,000192 |
| RPRD1A   | 1,709456 | 1,05E-18 |
| SLC29A4  | 1,706703 | 3,16E-10 |
| DGCR6L   | 1,705664 | 1,37E-16 |
| ALKBH4   | 1,704876 | 2,25E-08 |
| HSCB     | 1,704364 | 1,47E-08 |
| ZNF85    | 1,702434 | 4,24E-10 |
| ZNF653   | 1,699191 | 5,97E-05 |
| EXD2     | 1,698477 | 2,07E-16 |
| SLC3A2   | 1,698118 | 2,41E-21 |

|           |          |          |
|-----------|----------|----------|
| PRSS23    | 1,69808  | 4,48E-08 |
| MIF4GD    | 1,694949 | 1,91E-07 |
| SERTAD3   | 1,69461  | 9,27E-07 |
| NSD1      | 1,6938   | 3,90E-26 |
| GPR89A    | 1,692762 | 1,04E-07 |
| ISOC1     | 1,692276 | 2,51E-17 |
| FLJ42627  | 1,689627 | 0,000331 |
| ZNF425    | 1,687662 | 3,14E-06 |
| LOC104966 | 1,686623 | 0,000414 |
| HEXDC     | 1,685924 | 5,92E-07 |
| BRWD1     | 1,684039 | 1,76E-15 |
| DANCR     | 1,682698 | 7,50E-10 |
| GSTA4     | 1,681126 | 3,10E-05 |
| HILPDA    | 1,675813 | 7,45E-08 |
| MXD3      | 1,67566  | 8,74E-08 |
| WDR73     | 1,675025 | 5,19E-15 |
| SNRPE     | 1,672792 | 2,83E-23 |
| GTF3A     | 1,669102 | 9,85E-23 |
| HBP1      | 1,665234 | 9,72E-05 |
| DMPK      | 1,663759 | 4,96E-07 |
| NRAS      | 1,663023 | 4,82E-15 |
| DHPS      | 1,662845 | 4,24E-14 |
| MAML1     | 1,659999 | 2,87E-11 |
| CDC25C    | 1,656653 | 0,000205 |
| CHMP1B    | 1,655761 | 1,06E-13 |
| BCKDHA    | 1,652844 | 1,61E-11 |
| KIF27     | 1,652026 | 0,000724 |
| TMC5      | 1,648705 | 0,000411 |
| DOCK6     | 1,648425 | 4,01E-12 |
| CBWD2     | 1,646989 | 6,08E-10 |
| TATDN1    | 1,646135 | 6,33E-16 |
| RNF5      | 1,645704 | 6,71E-09 |
| ZNF569    | 1,644548 | 2,10E-05 |
| TRIM41    | 1,642613 | 6,40E-13 |
| CDC25B    | 1,641436 | 1,02E-14 |
| ZNF14     | 1,639776 | 0,000421 |
| PARP6     | 1,639656 | 4,37E-08 |
| TRIM45    | 1,63943  | 3,68E-05 |
| RMND5A    | 1,638852 | 1,90E-13 |
| C15orf61  | 1,63643  | 1,87E-05 |
| MPV17L2   | 1,635705 | 6,81E-11 |
| ZNF628    | 1,634885 | 1,88E-09 |
| N4BP2     | 1,634299 | 2,07E-07 |
| CERCAM    | 1,634183 | 5,88E-05 |
| PRADC1    | 1,632957 | 2,78E-05 |
| DTNB      | 1,631973 | 1,06E-08 |
| FCHO1     | 1,631875 | 1,69E-15 |
| LDOC1     | 1,630616 | 2,08E-09 |
| ACACB     | 1,629948 | 2,45E-09 |
| RAB33B    | 1,628877 | 0,000218 |

|           |          |          |
|-----------|----------|----------|
| EDC3      | 1,628271 | 9,71E-11 |
| FAM117B   | 1,627442 | 3,66E-09 |
| ARRB2     | 1,625844 | 1,11E-14 |
| RAB30     | 1,62417  | 2,22E-06 |
| MEX3B     | 1,623727 | 4,80E-11 |
| PGBD2     | 1,622252 | 0,000125 |
| TPD52L1   | 1,62217  | 1,55E-06 |
| PRDM4     | 1,620696 | 2,68E-23 |
| TMEM168   | 1,6128   | 2,06E-13 |
| IRF2BP1   | 1,611058 | 4,27E-10 |
| EZH2      | 1,609127 | 5,56E-07 |
| ICAM3     | 1,606861 | 9,05E-05 |
| MAZ       | 1,605506 | 5,86E-16 |
| GPATCH2   | 1,598111 | 1,02E-09 |
| GALNT6    | 1,596687 | 7,12E-06 |
| DYNLL2    | 1,596291 | 7,56E-20 |
| ABHD16A   | 1,595853 | 1,33E-12 |
| CHD6      | 1,595619 | 9,84E-20 |
| UPF3B     | 1,59479  | 7,05E-08 |
| RPRD2     | 1,59466  | 2,57E-17 |
| UBL3      | 1,594314 | 3,85E-08 |
| ENDOG     | 1,593361 | 6,25E-10 |
| ABCC10    | 1,592008 | 1,39E-08 |
| MRPS21    | 1,590781 | 1,58E-18 |
| SLC25A29  | 1,586224 | 6,16E-13 |
| GTF2IRD2B | 1,584579 | 2,79E-07 |
| TLE3      | 1,583143 | 1,11E-21 |
| PHYKPL    | 1,582337 | 0,000106 |
| P3H4      | 1,581888 | 2,84E-14 |
| INTS3     | 1,581884 | 6,23E-19 |
| KIFC2     | 1,580916 | 1,89E-07 |
| SLC25A39  | 1,576125 | 1,53E-23 |
| ATP6V0E2  | 1,571539 | 1,24E-06 |
| PRUNE     | 1,569745 | 9,00E-13 |
| ZNF816    | 1,569723 | 8,98E-07 |
| ZNF618    | 1,569634 | 5,76E-18 |
| SLC9A3R1  | 1,56699  | 2,17E-08 |
| ARRDC1    | 1,566696 | 1,04E-11 |
| SEC11C    | 1,566489 | 7,05E-07 |
| DUSP23    | 1,566329 | 6,93E-09 |
| NGRN      | 1,564702 | 7,08E-21 |
| PAFAH1B3  | 1,563703 | 5,84E-15 |
| DSC2      | 1,561074 | 1,02E-11 |
| C14orf2   | 1,559491 | 1,01E-15 |
| HAGH      | 1,559293 | 5,54E-06 |
| LRRC45    | 1,556621 | 5,81E-12 |
| ZNF480    | 1,554855 | 5,83E-09 |
| CDC42BPG  | 1,554421 | 1,29E-05 |
| TRMT12    | 1,554306 | 5,79E-10 |
| RUSC1     | 1,550263 | 2,48E-11 |



|                       |          |          |
|-----------------------|----------|----------|
| PNMA1                 | 1,549977 | 7,66E-11 |
| NAAA                  | 1,545764 | 2,65E-05 |
| LRFN3                 | 1,545355 | 5,72E-06 |
| PPP1R13B              | 1,544826 | 1,62E-08 |
| ECI1                  | 1,543203 | 1,11E-13 |
| KCTD1                 | 1,542665 | 1,93E-06 |
| OIP5-AS1              | 1,542148 | 3,16E-09 |
| SULF2                 | 1,541609 | 4,33E-09 |
| IDH2                  | 1,53825  | 2,09E-19 |
| HOXC10                | 1,537991 | 1,49E-10 |
| ZC3H10                | 1,533814 | 1,08E-05 |
| NDUFB9                | 1,533112 | 1,20E-10 |
| EFNA1                 | 1,533018 | 0,000307 |
| MYL12B                | 1,532813 | 1,29E-18 |
| NUDT4                 | 1,531713 | 5,29E-09 |
| ACSF3                 | 1,5313   | 2,15E-13 |
| RPAIN                 | 1,530425 | 1,22E-11 |
| ZKSCAN1               | 1,52871  | 3,19E-15 |
| PDE7A                 | 1,528217 | 2,14E-07 |
| JOSD2                 | 1,527757 | 0,000115 |
| TOB1                  | 1,527733 | 1,56E-07 |
| JTB                   | 1,525035 | 7,58E-15 |
| ID1                   | 1,524201 | 0,000122 |
| ZNF138                | 1,524171 | 3,28E-09 |
| RAD23A                | 1,523598 | 2,38E-17 |
| RNASEH1- <del>A</del> | 1,523381 | 7,58E-08 |
| TOR3A                 | 1,523363 | 2,54E-14 |
| ZSCAN2                | 1,523296 | 1,53E-09 |
| GRK6                  | 1,52009  | 3,48E-16 |
| KCTD13                | 1,51858  | 9,87E-08 |
| COIL                  | 1,517426 | 2,73E-05 |
| ADIPOR1               | 1,51726  | 2,81E-07 |
| EXOSC5                | 1,517195 | 1,48E-06 |
| MALAT1                | 1,516656 | 3,72E-06 |
| DUS4L                 | 1,513572 | 7,28E-08 |
| RAB24                 | 1,509832 | 3,67E-07 |
| FAM50B                | 1,508813 | 1,18E-07 |
| TRIB1                 | 1,507822 | 3,92E-08 |
| RP9                   | 1,50756  | 1,49E-06 |
| SRPK2                 | 1,506643 | 2,24E-15 |
| PYCARD                | 1,506346 | 6,22E-05 |
| METTL2A               | 1,505545 | 5,73E-12 |
| NECAB3                | 1,505224 | 3,13E-05 |
| CASZ1                 | 1,50189  | 0,000172 |
| RRBP1                 | 1,500525 | 8,36E-07 |
| BPTF                  | 1,498528 | 1,16E-19 |
| ATP5I                 | 1,49839  | 1,76E-16 |
| POLR2J                | 1,49771  | 5,04E-10 |
| ATP5S                 | 1,496317 | 0,000379 |
| BMP2                  | 1,496263 | 3,22E-10 |

|           |          |          |
|-----------|----------|----------|
| FAM193B   | 1,495981 | 3,10E-06 |
| PACSIN3   | 1,495808 | 3,84E-14 |
| DDX49     | 1,494249 | 4,50E-14 |
| TPCN2     | 1,493935 | 6,88E-06 |
| ORC5      | 1,491379 | 2,63E-05 |
| CEP76     | 1,491207 | 0,000303 |
| FLJ23867  | 1,490059 | 5,13E-06 |
| BCL7A     | 1,489947 | 8,42E-10 |
| TBC1D9B   | 1,489875 | 2,98E-16 |
| DNAAF2    | 1,486262 | 2,54E-11 |
| ATXN3     | 1,485747 | 3,56E-07 |
| ILVBL     | 1,483438 | 1,67E-16 |
| POLR1D    | 1,482147 | 5,56E-17 |
| L2HGDH    | 1,480757 | 7,12E-12 |
| FUNDC2    | 1,480443 | 6,90E-11 |
| TARS2     | 1,476779 | 2,61E-09 |
| FIS1      | 1,476166 | 1,90E-13 |
| PDCL3     | 1,47549  | 2,95E-09 |
| ABCA7     | 1,475094 | 0,000757 |
| CCDC97    | 1,473313 | 4,70E-12 |
| PRR3      | 1,473248 | 1,68E-05 |
| RALGDS    | 1,469956 | 5,42E-11 |
| C6orf47   | 1,466296 | 1,36E-12 |
| C19orf43  | 1,465943 | 1,04E-18 |
| KANSL1L   | 1,465389 | 0,000273 |
| ZNF398    | 1,464471 | 8,89E-15 |
| H2AFY2    | 1,463608 | 6,17E-08 |
| LINC00674 | 1,463297 | 2,01E-08 |
| TBC1D7    | 1,460546 | 9,25E-08 |
| COBLL1    | 1,460093 | 4,41E-06 |
| SORD      | 1,459832 | 1,80E-16 |
| PRPF3     | 1,4587   | 1,50E-06 |
| ZNF710    | 1,456546 | 7,54E-09 |
| CROCC     | 1,456025 | 1,51E-05 |
| GIN1      | 1,45588  | 6,54E-05 |
| ATG4D     | 1,454948 | 3,57E-06 |
| PIF1      | 1,454519 | 0,000546 |
| FBXO31    | 1,453293 | 1,88E-12 |
| SFXN4     | 1,45255  | 2,05E-10 |
| ZFP36     | 1,451689 | 8,65E-06 |
| HMG20B    | 1,451188 | 1,85E-17 |
| SEPHS2    | 1,450793 | 1,02E-15 |
| TYSND1    | 1,450791 | 1,41E-12 |
| SNHG7     | 1,450144 | 3,95E-10 |
| CCDC101   | 1,449379 | 1,28E-06 |
| ACTR6     | 1,446743 | 1,05E-08 |
| PPIP5K1   | 1,4444   | 5,04E-06 |
| ATMIN     | 1,443798 | 3,13E-15 |
| THAP7     | 1,443259 | 6,02E-08 |
| ZNF33B    | 1,442767 | 1,77E-07 |

|           |          |          |
|-----------|----------|----------|
| SLC25A43  | 1,442365 | 2,74E-09 |
| MTMR4     | 1,4413   | 4,16E-14 |
| NUCKS1    | 1,440085 | 6,17E-16 |
| WDR60     | 1,439334 | 4,03E-08 |
| ACOX3     | 1,438806 | 1,44E-05 |
| SAMD1     | 1,438533 | 2,93E-09 |
| ZBTB22    | 1,436147 | 2,26E-07 |
| BCAM      | 1,43502  | 7,43E-08 |
| F8A1      | 1,434772 | 5,73E-06 |
| SMDT1     | 1,434168 | 4,71E-06 |
| MFSD2A    | 1,43197  | 2,55E-05 |
| FITM2     | 1,431775 | 3,05E-05 |
| UBN2      | 1,428582 | 7,00E-09 |
| STMN3     | 1,428122 | 3,57E-06 |
| ASNA1     | 1,426468 | 1,24E-17 |
| FAM120AC  | 1,426232 | 8,93E-11 |
| ZNF514    | 1,425998 | 4,04E-05 |
| FLAD1     | 1,4232   | 5,07E-15 |
| FAM206A   | 1,422883 | 3,09E-06 |
| EPC1      | 1,421949 | 2,61E-11 |
| ITPKB     | 1,421372 | 2,21E-05 |
| C14orf132 | 1,421068 | 6,77E-08 |
| SURF1     | 1,419919 | 2,13E-06 |
| STX6      | 1,419762 | 6,26E-13 |
| LINC00938 | 1,416554 | 0,000611 |
| KIAA1958  | 1,4161   | 2,04E-07 |
| PSMD4     | 1,415487 | 2,09E-19 |
| SLC27A4   | 1,414754 | 6,56E-06 |
| ZBTB5     | 1,412679 | 4,16E-07 |
| CGRRF1    | 1,41163  | 0,000627 |
| CENPB     | 1,409602 | 4,98E-17 |
| ANKRD13B  | 1,407724 | 1,07E-08 |
| RARG      | 1,407569 | 1,56E-08 |
| CNNM3     | 1,402915 | 7,94E-08 |
| TMED3     | 1,402225 | 4,55E-09 |
| BBS10     | 1,40215  | 1,51E-05 |
| STK19     | 1,401946 | 2,93E-05 |
| MAP3K6    | 1,401428 | 9,44E-08 |
| CDC42SE1  | 1,398722 | 4,39E-10 |
| PPAP2A    | 1,397232 | 1,67E-05 |
| C1orf43   | 1,396714 | 1,87E-13 |
| UBAC1     | 1,396665 | 1,22E-13 |
| NARF      | 1,39158  | 0,000406 |
| EIF4EBP2  | 1,390731 | 2,57E-06 |
| TBCC      | 1,39002  | 9,78E-08 |
| RUFY1     | 1,389827 | 4,57E-09 |
| SLC44A2   | 1,389177 | 1,66E-11 |
| CNOT8     | 1,388763 | 2,16E-11 |
| ZNF592    | 1,387019 | 1,03E-09 |
| CBS       | 1,386494 | 1,58E-08 |

|           |          |          |
|-----------|----------|----------|
| NR2F6     | 1,385107 | 8,86E-07 |
| DCP2      | 1,384963 | 2,35E-12 |
| CHRNA5    | 1,382184 | 2,29E-09 |
| VTI1B     | 1,376404 | 1,56E-07 |
| ZBTB9     | 1,376013 | 7,97E-09 |
| FAM72D    | 1,37587  | 0,000957 |
| PARP16    | 1,375123 | 3,10E-05 |
| MORC2     | 1,372516 | 3,79E-12 |
| AMER1     | 1,372117 | 1,37E-06 |
| PPIC      | 1,371718 | 5,79E-08 |
| MRPS18A   | 1,369796 | 1,12E-12 |
| TMBIM4    | 1,369615 | 2,23E-07 |
| VAR52     | 1,365918 | 3,74E-08 |
| ANKRD39   | 1,364679 | 2,99E-05 |
| FLOT2     | 1,364621 | 4,51E-08 |
| WIBG      | 1,364158 | 3,10E-08 |
| APH1A     | 1,364087 | 2,79E-15 |
| CKB       | 1,364005 | 9,40E-06 |
| LMNB1     | 1,362999 | 1,66E-10 |
| C19orf60  | 1,362383 | 4,69E-08 |
| ZNF718    | 1,362311 | 5,79E-05 |
| ZNF254    | 1,36112  | 1,75E-07 |
| CRIP2     | 1,360585 | 1,62E-12 |
| ZNF607    | 1,360134 | 8,41E-07 |
| C14orf142 | 1,356756 | 1,28E-05 |
| PIGM      | 1,356154 | 2,84E-05 |
| MPZL3     | 1,355451 | 0,000235 |
| PIGB      | 1,354884 | 4,01E-06 |
| ZFP1      | 1,353978 | 4,52E-07 |
| TEF       | 1,353923 | 0,000605 |
| DDX41     | 1,353748 | 2,06E-15 |
| CLN6      | 1,353063 | 4,03E-15 |
| TMEM79    | 1,351197 | 2,77E-05 |
| CHCHD5    | 1,35111  | 4,55E-07 |
| BNIP3     | 1,348363 | 4,04E-10 |
| BOD1      | 1,347495 | 2,75E-06 |
| GOLPH3L   | 1,347056 | 0,000227 |
| IDH1      | 1,346768 | 1,09E-16 |
| C7orf43   | 1,346686 | 1,47E-06 |
| LAMTOR2   | 1,344209 | 4,18E-11 |
| ZNF766    | 1,344175 | 9,17E-10 |
| HAX1      | 1,340957 | 5,41E-15 |
| RALBP1    | 1,338897 | 7,78E-08 |
| RPS18     | 1,335588 | 7,28E-06 |
| SNX27     | 1,335085 | 1,47E-10 |
| TEX2      | 1,333428 | 8,08E-10 |
| PTRH2     | 1,332454 | 5,49E-09 |
| SH2B2     | 1,332168 | 0,000162 |
| PCDHGC3   | 1,331745 | 0,000268 |
| H1FX      | 1,33097  | 1,63E-06 |

|           |          |          |
|-----------|----------|----------|
| C9orf114  | 1,329363 | 3,79E-07 |
| KIAA0195  | 1,327181 | 5,29E-10 |
| MIF-AS1   | 1,327119 | 7,03E-06 |
| CINP      | 1,326595 | 0,00019  |
| KLHDC3    | 1,325751 | 6,10E-07 |
| COX6B1    | 1,325317 | 1,39E-09 |
| TRAPPC13  | 1,322413 | 3,13E-07 |
| MARK3     | 1,321916 | 1,41E-07 |
| EIF3K     | 1,321342 | 2,01E-08 |
| IFT22     | 1,320591 | 1,86E-11 |
| ZSCAN9    | 1,319561 | 0,000571 |
| ARHGAP39  | 1,318249 | 9,25E-05 |
| SURF2     | 1,317449 | 7,43E-09 |
| TRIM39    | 1,317446 | 0,000174 |
| ENTPD5    | 1,315403 | 0,000457 |
| SLIRP     | 1,314654 | 2,32E-07 |
| CCDC112   | 1,314605 | 4,05E-05 |
| PPP4R3A   | 1,313882 | 4,82E-13 |
| TMEM161   | 1,313745 | 2,03E-05 |
| DHFRL1    | 1,311467 | 1,82E-05 |
| SCYL3     | 1,310067 | 0,000164 |
| FAM213A   | 1,309754 | 2,63E-05 |
| TMEM205   | 1,309164 | 1,89E-06 |
| ZNF431    | 1,308815 | 1,16E-05 |
| ZNF557    | 1,308411 | 9,64E-05 |
| ARL4A     | 1,30814  | 1,47E-09 |
| MYO1D     | 1,30562  | 8,61E-06 |
| AP5M1     | 1,305431 | 2,59E-07 |
| GAA       | 1,305145 | 5,04E-06 |
| DHRS7B    | 1,304552 | 1,59E-06 |
| PSMA3-AS1 | 1,304373 | 0,000112 |
| PMVK      | 1,303454 | 3,45E-08 |
| TNK1      | 1,302765 | 2,12E-06 |
| HNRNPAB   | 1,302352 | 3,87E-15 |
| DYM       | 1,300774 | 1,00E-11 |
| TMEM134   | 1,298619 | 7,44E-05 |
| SIPA1L1   | 1,297727 | 3,36E-11 |
| SNRPA1    | 1,296739 | 1,20E-11 |
| GCLC      | 1,296571 | 3,04E-07 |
| RPS29     | 1,296345 | 2,95E-06 |
| BNIP1     | 1,296174 | 0,000756 |
| CACNB3    | 1,294821 | 5,67E-10 |
| ZNF93     | 1,294771 | 5,55E-07 |
| ZNF839    | 1,2942   | 0,000291 |
| GADD45GII | 1,292725 | 1,89E-05 |
| SIVA1     | 1,292304 | 1,33E-07 |
| SPHK2     | 1,292007 | 1,02E-06 |
| PFKL      | 1,290659 | 4,23E-10 |
| SGPL1     | 1,289452 | 4,00E-10 |
| RINT1     | 1,28878  | 8,94E-06 |

|           |          |          |
|-----------|----------|----------|
| VMP1      | 1,288239 | 1,38E-08 |
| PUS7      | 1,287764 | 9,65E-07 |
| XXYL1     | 1,285903 | 6,38E-11 |
| ZNF675    | 1,284236 | 1,47E-05 |
| HSPB1     | 1,283988 | 2,14E-07 |
| MYL12A    | 1,283186 | 1,70E-10 |
| TMEM185F  | 1,280664 | 7,85E-09 |
| H3F3B     | 1,276933 | 5,57E-16 |
| RBAK      | 1,27681  | 2,65E-09 |
| TMEM64    | 1,2758   | 6,29E-12 |
| ZNF524    | 1,275505 | 9,93E-05 |
| ICK       | 1,274747 | 3,88E-09 |
| FARSA     | 1,274338 | 1,22E-07 |
| TIGD6     | 1,273967 | 0,000322 |
| TLK2      | 1,273486 | 0,000186 |
| PITX1     | 1,273249 | 8,86E-09 |
| MRPS18C   | 1,272793 | 5,15E-08 |
| STAP2     | 1,271932 | 2,68E-06 |
| RNMTL1    | 1,27127  | 1,29E-07 |
| PYGO2     | 1,271099 | 6,75E-10 |
| ZNF771    | 1,270292 | 0,000648 |
| OTUD7B    | 1,270072 | 2,03E-11 |
| SIX4      | 1,265772 | 2,22E-06 |
| TRIM26    | 1,264596 | 2,39E-09 |
| BCAP31    | 1,264373 | 1,49E-08 |
| SERF2     | 1,264052 | 4,67E-08 |
| ADCK2     | 1,26366  | 5,82E-06 |
| CTBP1-AS2 | 1,262355 | 2,81E-05 |
| PAN2      | 1,261705 | 0,000122 |
| NDUFA13   | 1,261085 | 1,92E-12 |
| CXorf23   | 1,255612 | 0,000254 |
| FLYWCH2   | 1,254953 | 3,07E-06 |
| NELFE     | 1,253657 | 3,56E-13 |
| UHRF1BP1  | 1,253474 | 2,55E-05 |
| SIRT5     | 1,251422 | 3,95E-07 |
| AIMP2     | 1,250537 | 3,90E-11 |
| TPD52     | 1,249715 | 2,22E-10 |
| TP53TG1   | 1,249601 | 0,000179 |
| THOC7     | 1,249052 | 6,97E-12 |
| CALM1     | 1,248208 | 1,54E-06 |
| AADAT     | 1,248081 | 0,000306 |
| RBM4      | 1,247185 | 4,48E-09 |
| MED13     | 1,246786 | 3,65E-14 |
| ZNF616    | 1,246582 | 2,97E-07 |
| IGF1R     | 1,244291 | 7,23E-10 |
| OXLD1     | 1,244122 | 0,000253 |
| MEA1      | 1,243672 | 2,04E-12 |
| CYB5D2    | 1,243315 | 2,95E-05 |
| FRS2      | 1,243175 | 4,72E-05 |
| FAM3A     | 1,24313  | 4,55E-07 |

|           |          |          |
|-----------|----------|----------|
| ZNF219    | 1,242669 | 5,60E-06 |
| RPS14     | 1,241822 | 1,12E-09 |
| D2HGDH    | 1,241553 | 1,18E-05 |
| NKRF      | 1,239361 | 4,19E-08 |
| SQLE      | 1,238515 | 1,50E-09 |
| FZD3      | 1,236343 | 0,000183 |
| ZNF212    | 1,234692 | 1,66E-06 |
| FAM83H    | 1,233496 | 8,49E-09 |
| DARS2     | 1,233013 | 2,67E-11 |
| IQCK      | 1,232595 | 3,19E-05 |
| PVT1      | 1,231738 | 0,000132 |
| PCLO      | 1,231017 | 4,81E-05 |
| C19orf52  | 1,230564 | 1,43E-05 |
| CCDC47    | 1,230343 | 6,40E-10 |
| ZRANB1    | 1,22812  | 6,25E-08 |
| THNSL1    | 1,227878 | 1,13E-08 |
| OBSL1     | 1,22742  | 0,00025  |
| CUL7      | 1,227213 | 1,13E-05 |
| SUPT4H1   | 1,226992 | 4,27E-10 |
| FEM1B     | 1,226906 | 7,28E-10 |
| ETFA      | 1,226015 | 1,60E-06 |
| MAP2K5    | 1,225737 | 6,94E-07 |
| ARF5      | 1,225282 | 2,81E-12 |
| LINC00665 | 1,223395 | 4,15E-05 |
| ZNF429    | 1,222025 | 3,17E-05 |
| DLG3      | 1,221698 | 3,88E-09 |
| ZNF286A   | 1,220687 | 2,31E-07 |
| ZNF33A    | 1,219815 | 1,15E-06 |
| RPS11     | 1,219385 | 1,59E-07 |
| CUX1      | 1,21863  | 1,44E-09 |
| NFKBIL1   | 1,218572 | 2,80E-07 |
| DPY19L3   | 1,215584 | 2,87E-06 |
| KRTCAP2   | 1,214514 | 7,10E-11 |
| DTWD2     | 1,213619 | 0,000186 |
| NOL11     | 1,212341 | 1,85E-12 |
| CTSH      | 1,212002 | 7,44E-05 |
| CNNM4     | 1,211538 | 3,58E-06 |
| SLC5A6    | 1,211157 | 0,000112 |
| BRPF3     | 1,210367 | 4,32E-08 |
| ELP5      | 1,210053 | 4,11E-08 |
| ZNF620    | 1,209545 | 0,000702 |
| RPS27     | 1,209133 | 7,23E-05 |
| ATP5D     | 1,209044 | 5,46E-12 |
| ZNF688    | 1,20864  | 0,000527 |
| EFCAB11   | 1,208074 | 0,000108 |
| OXR1      | 1,207993 | 2,16E-06 |
| MED7      | 1,207745 | 0,000505 |
| PPL       | 1,206584 | 0,000429 |
| KNSTRN    | 1,205641 | 0,000391 |
| PCGF3     | 1,204711 | 2,41E-09 |

|          |          |          |
|----------|----------|----------|
| NSUN5    | 1,204435 | 7,10E-08 |
| UFC1     | 1,203503 | 0,000284 |
| WDR62    | 1,203137 | 5,65E-07 |
| HKR1     | 1,202247 | 2,81E-05 |
| RPL17    | 1,202198 | 1,59E-06 |
| CKS1B    | 1,201859 | 0,000249 |
| PTRHD1   | 1,201371 | 0,000175 |
| ACP2     | 1,201133 | 5,00E-05 |
| RFXANK   | 1,200478 | 1,61E-09 |
| FUT8     | 1,199375 | 2,22E-09 |
| ZNF600   | 1,198505 | 0,00044  |
| ZMYM2    | 1,196812 | 5,61E-10 |
| ZNF140   | 1,196658 | 2,92E-05 |
| ZNF91    | 1,196344 | 6,81E-06 |
| BLOC1S3  | 1,195558 | 5,16E-06 |
| MAPK13   | 1,195414 | 6,81E-11 |
| PSMB4    | 1,195133 | 6,12E-09 |
| ZDHHC24  | 1,190346 | 0,001005 |
| UBE2Q1   | 1,189947 | 4,81E-10 |
| SLC52A2  | 1,188135 | 7,56E-09 |
| ZNF444   | 1,187195 | 7,58E-07 |
| GPSM2    | 1,186792 | 2,94E-09 |
| SS18L1   | 1,186622 | 0,00092  |
| CDYL     | 1,186273 | 1,39E-08 |
| PPP1R13L | 1,185847 | 0,00039  |
| ZNF768   | 1,184559 | 1,59E-07 |
| TUBB3    | 1,18444  | 5,96E-13 |
| USF2     | 1,183906 | 3,43E-11 |
| ATXN7L3  | 1,183861 | 5,01E-11 |
| POLR2I   | 1,183618 | 1,44E-08 |
| PPDPF    | 1,182207 | 3,77E-08 |
| PTGR2    | 1,181889 | 0,000336 |
| ACOT13   | 1,181692 | 8,53E-06 |
| CD24     | 1,181403 | 8,65E-07 |
| MRPL57   | 1,180846 | 1,53E-09 |
| SHTN1    | 1,180714 | 8,81E-09 |
| ZNF525   | 1,180115 | 1,73E-05 |
| DUS1L    | 1,180113 | 2,86E-07 |
| TAMM41   | 1,179963 | 3,21E-06 |
| GLRX2    | 1,178972 | 3,67E-05 |
| ARNT     | 1,176738 | 3,82E-10 |
| TDRD3    | 1,172031 | 7,85E-05 |
| COPE     | 1,172003 | 1,78E-10 |
| ANGEL1   | 1,17198  | 4,19E-08 |
| RDH13    | 1,17102  | 1,97E-06 |
| ILF3-AS1 | 1,170629 | 0,000498 |
| C11orf80 | 1,169342 | 0,000126 |
| C7orf26  | 1,169013 | 1,02E-08 |
| KRT10    | 1,168858 | 0,000383 |
| ARID4A   | 1,167786 | 3,44E-05 |



|          |          |          |
|----------|----------|----------|
| NUSAP1   | 1,167658 | 1,53E-05 |
| MRFAP1L1 | 1,165937 | 2,05E-09 |
| ARMC10   | 1,165823 | 2,69E-08 |
| RNF113A  | 1,165387 | 8,89E-06 |
| NAA10    | 1,164329 | 3,66E-11 |
| EXOSC4   | 1,163997 | 1,66E-08 |
| MRPL9    | 1,163947 | 2,03E-06 |
| CCZ1     | 1,163923 | 9,91E-05 |
| STK38    | 1,162787 | 3,79E-08 |
| PEX1     | 1,162727 | 3,83E-06 |
| SEC11A   | 1,162198 | 2,96E-12 |
| ZFP36L2  | 1,160649 | 0,000432 |
| SPATA5L1 | 1,159729 | 0,000322 |
| ATP5A1   | 1,159415 | 7,72E-14 |
| TPT1     | 1,159005 | 1,50E-06 |
| KIF20A   | 1,158913 | 1,18E-06 |
| SLC35B2  | 1,157203 | 3,76E-05 |
| RNF130   | 1,157175 | 3,56E-06 |
| PRELID1  | 1,156566 | 5,43E-10 |
| MTERF1   | 1,156521 | 0,000127 |
| SIX1     | 1,156111 | 0,000107 |
| CCDC85C  | 1,1549   | 1,78E-10 |
| YIF1A    | 1,154567 | 4,11E-10 |
| CISD3    | 1,153285 | 0,000265 |
| C1orf27  | 1,151741 | 2,75E-05 |
| SF3B4    | 1,150994 | 2,46E-12 |
| NT5C     | 1,150777 | 0,000139 |
| GNB2L1   | 1,150722 | 2,90E-13 |
| DFNB31   | 1,15047  | 0,000919 |
| ZNF888   | 1,146011 | 0,000222 |
| CTNNBIP1 | 1,145051 | 1,08E-05 |
| HCFC1R1  | 1,144724 | 4,58E-08 |
| MBTD1    | 1,142643 | 0,000419 |
| ARL8A    | 1,141311 | 5,16E-09 |
| DENND2D  | 1,140864 | 4,96E-07 |
| PLCH1    | 1,140688 | 1,39E-06 |
| EPC2     | 1,14058  | 3,45E-06 |
| NDUFB7   | 1,14025  | 7,60E-11 |
| ZNF777   | 1,138696 | 0,000154 |
| IMP4     | 1,137457 | 2,23E-11 |
| TSPAN17  | 1,13737  | 1,47E-05 |
| VANGL1   | 1,135268 | 1,21E-05 |
| NUDT12   | 1,134553 | 0,00072  |
| IMP3     | 1,132458 | 8,40E-09 |
| CC2D1A   | 1,131987 | 9,67E-06 |
| GGCT     | 1,130412 | 9,97E-11 |
| H2AFJ    | 1,125467 | 0,000103 |
| DNMT3A   | 1,125311 | 3,48E-08 |
| ZNF511   | 1,124341 | 2,38E-05 |
| SSR4     | 1,124127 | 5,69E-08 |

|         |          |          |
|---------|----------|----------|
| OFD1    | 1,123445 | 1,60E-05 |
| ALKBH7  | 1,122279 | 7,78E-07 |
| MACROD1 | 1,121271 | 1,08E-05 |
| GOT1    | 1,119167 | 7,14E-07 |
| MRPS12  | 1,119122 | 4,63E-07 |
| RFWD2   | 1,117103 | 3,91E-08 |
| LENG1   | 1,115837 | 0,000976 |
| KLHL25  | 1,115422 | 7,32E-05 |
| SSNA1   | 1,115195 | 1,12E-06 |
| SMG8    | 1,115073 | 8,82E-07 |
| RPL18A  | 1,114696 | 3,31E-07 |
| FAM127B | 1,113995 | 2,42E-09 |
| EVL     | 1,113245 | 7,31E-07 |
| LDB1    | 1,113149 | 3,81E-09 |
| COX6A1  | 1,111442 | 9,55E-12 |
| EHMT2   | 1,111426 | 1,21E-11 |
| EMC9    | 1,111    | 0,000347 |
| RCOR1   | 1,109622 | 1,18E-08 |
| LMAN2   | 1,109396 | 7,68E-08 |
| ZNF721  | 1,108542 | 7,37E-07 |
| R3HCC1L | 1,107205 | 1,52E-05 |
| EIF2B2  | 1,106704 | 3,13E-09 |
| MCUR1   | 1,106585 | 6,76E-05 |
| HTRA1   | 1,10105  | 5,88E-06 |
| ATP6AP1 | 1,100916 | 6,40E-05 |
| IQCE    | 1,099982 | 1,01E-07 |
| GATAD1  | 1,098679 | 0,000315 |
| RPS19   | 1,098594 | 3,98E-07 |
| RPLP1   | 1,098446 | 0,000475 |
| TKFC    | 1,098276 | 1,09E-07 |
| NDUFAF7 | 1,09814  | 0,000218 |
| ZNF787  | 1,097921 | 1,12E-07 |
| ORC2    | 1,096729 | 3,12E-05 |
| MRPS36  | 1,09671  | 0,000111 |
| HMGN1   | 1,095538 | 1,14E-09 |
| YIPF2   | 1,095404 | 1,75E-06 |
| NDUFA1  | 1,09502  | 2,12E-07 |
| SEPHS1  | 1,095011 | 1,19E-05 |
| ECHS1   | 1,09385  | 7,62E-08 |
| SRP19   | 1,092837 | 1,48E-06 |
| KNOP1   | 1,091947 | 8,06E-09 |
| TMEM97  | 1,091508 | 1,07E-08 |
| CHD3    | 1,090558 | 7,21E-08 |
| CCNJ    | 1,090491 | 1,50E-05 |
| FAM58A  | 1,090235 | 8,58E-06 |
| PRPSAP2 | 1,090006 | 0,000567 |
| TRMT2B  | 1,089556 | 0,000165 |
| COX7C   | 1,089051 | 6,76E-11 |
| PIP5K1A | 1,087698 | 5,88E-05 |
| CYB5A   | 1,087095 | 0,000482 |

|          |          |          |
|----------|----------|----------|
| KIFC1    | 1,085756 | 2,23E-05 |
| ZNF260   | 1,084164 | 3,34E-06 |
| NDUFB1   | 1,083106 | 2,27E-06 |
| ZNF701   | 1,083022 | 0,000578 |
| SPG21    | 1,082458 | 2,98E-10 |
| DNAJC2   | 1,080828 | 1,69E-09 |
| DBN1     | 1,079693 | 1,76E-11 |
| PROSER1  | 1,079553 | 2,08E-10 |
| CECR5    | 1,078596 | 2,68E-08 |
| BRD2     | 1,078086 | 4,17E-05 |
| ZNF316   | 1,077122 | 9,31E-09 |
| C7orf50  | 1,076295 | 1,52E-06 |
| NPM3     | 1,075615 | 1,29E-07 |
| ATP5H    | 1,072828 | 9,49E-07 |
| MARC1    | 1,070507 | 1,74E-05 |
| SREBF1   | 1,070243 | 1,66E-05 |
| PTPN18   | 1,070185 | 1,74E-07 |
| PSRC1    | 1,068838 | 0,000576 |
| SLC39A9  | 1,068167 | 1,76E-09 |
| STK36    | 1,067138 | 1,02E-05 |
| NDUFA3   | 1,06694  | 3,86E-05 |
| PGGT1B   | 1,06591  | 2,01E-05 |
| VPS52    | 1,065669 | 2,07E-09 |
| FAM195A  | 1,065639 | 4,41E-07 |
| PRR7     | 1,06491  | 1,72E-06 |
| CNOT6    | 1,063613 | 1,95E-07 |
| UQCC2    | 1,063548 | 0,000222 |
| ATAT1    | 1,062613 | 0,00045  |
| C19orf24 | 1,062087 | 2,87E-05 |
| PANK3    | 1,060915 | 8,75E-08 |
| PSMC5    | 1,060497 | 3,74E-06 |
| CHMP4A   | 1,059652 | 6,90E-05 |
| GLRX5    | 1,057494 | 4,86E-06 |
| ECSIT    | 1,056573 | 1,53E-06 |
| NSDHL    | 1,056435 | 1,29E-06 |
| TMEM11   | 1,054716 | 4,29E-07 |
| PPP1R11  | 1,054686 | 4,11E-06 |
| VPS45    | 1,052955 | 2,93E-06 |
| ZMYM5    | 1,052898 | 0,000449 |
| NDUFA2   | 1,052716 | 2,73E-06 |
| EMC4     | 1,051856 | 6,22E-05 |
| SUCLG1   | 1,051605 | 2,94E-08 |
| TAF7     | 1,050984 | 4,66E-09 |
| YDJC     | 1,049834 | 3,24E-05 |
| GAS8     | 1,049157 | 2,37E-05 |
| RAE1     | 1,047321 | 7,13E-07 |
| ANKS1A   | 1,047013 | 7,18E-07 |
| LRWD1    | 1,045152 | 0,000241 |
| TRAPPC6B | 1,044828 | 5,30E-05 |
| GLTSCR1  | 1,044678 | 0,000324 |

|          |          |          |
|----------|----------|----------|
| RSAD1    | 1,044532 | 1,58E-05 |
| GPRC5C   | 1,04393  | 0,000689 |
| NKAP     | 1,043919 | 0,000129 |
| ATG10    | 1,043887 | 0,00092  |
| PWWP2A   | 1,04328  | 3,18E-05 |
| MAD2L1BP | 1,042736 | 0,000306 |
| ZNF100   | 1,042659 | 4,91E-05 |
| EBAG9    | 1,041249 | 0,00019  |
| SOS1     | 1,03875  | 2,42E-07 |
| SYAP1    | 1,038466 | 7,15E-07 |
| MED6     | 1,037259 | 7,02E-05 |
| ZNF652   | 1,035869 | 2,09E-06 |
| PBX2     | 1,03216  | 4,90E-08 |
| PSEN1    | 1,03154  | 2,03E-06 |
| S100A13  | 1,030536 | 0,000123 |
| NKD1     | 1,030399 | 0,000115 |
| FAF2     | 1,028519 | 7,49E-09 |
| ZNF576   | 1,027581 | 0,00046  |
| CDKN2C   | 1,02714  | 0,000707 |
| IDH3G    | 1,026526 | 1,56E-07 |
| FAM89B   | 1,024747 | 7,84E-07 |
| SNX18    | 1,022173 | 0,000124 |
| VIMP     | 1,022124 | 5,23E-07 |
| SSR2     | 1,021429 | 2,88E-05 |
| FXR2     | 1,020772 | 1,75E-07 |
| EML1     | 1,020443 | 3,55E-05 |
| RNF139   | 1,019528 | 6,70E-07 |
| DGKZ     | 1,019516 | 4,32E-06 |
| RPS17    | 1,018586 | 5,88E-05 |
| NRBP1    | 1,01711  | 1,90E-07 |
| SLC25A5  | 1,01565  | 8,81E-05 |
| USP39    | 1,013339 | 3,17E-09 |
| THAP5    | 1,011092 | 4,52E-07 |
| LAMA5    | 1,010407 | 8,39E-09 |
| PAIP2    | 1,010282 | 0,000294 |
| NOP16    | 1,009898 | 1,22E-08 |
| SYTL2    | 1,008827 | 0,000112 |
| RNF181   | 1,008794 | 6,35E-07 |
| ZNF510   | 1,008034 | 0,000551 |
| AFG3L1P  | 1,007253 | 0,000356 |
| TRIM28   | 1,006888 | 3,32E-09 |
| SOS2     | 1,006102 | 7,33E-05 |
| MAN2B1   | 1,005707 | 5,05E-05 |
| ILF2     | 1,005499 | 2,59E-10 |
| C9orf156 | 1,004504 | 0,000458 |
| FAHD1    | 1,003932 | 3,72E-07 |
| HDHD3    | 1,003538 | 0,000297 |
| TOMM40   | 1,002676 | 3,06E-10 |
| ZNF83    | 1,002619 | 0,000783 |
| ARVCF    | 1,002019 | 7,32E-05 |

|          |          |          |
|----------|----------|----------|
| MRPL24   | 1,00175  | 6,46E-05 |
| SRGAP2   | 1,000732 | 2,20E-08 |
| MCM3AP   | 1,000096 | 1,04E-07 |
| DPP7     | 1,000057 | 6,54E-08 |
| ZDHC9    | 0,999744 | 0,000307 |
| CTPS2    | 0,999318 | 1,21E-06 |
| GRB14    | 0,998643 | 0,000351 |
| CFAP36   | 0,995041 | 0,000161 |
| ANK3     | 0,994939 | 0,000491 |
| IFT43    | 0,994718 | 0,000375 |
| ANAPC2   | 0,994406 | 9,47E-05 |
| TRAK2    | 0,993526 | 5,62E-09 |
| RRN3     | 0,993153 | 3,23E-07 |
| ACBD6    | 0,992356 | 4,87E-08 |
| FTSJ3    | 0,992252 | 2,64E-05 |
| SPR      | 0,992145 | 7,89E-07 |
| CTC1     | 0,991095 | 0,000266 |
| ZNF544   | 0,990198 | 2,96E-06 |
| IVD      | 0,989218 | 5,26E-05 |
| GNB5     | 0,988961 | 0,000274 |
| DDX20    | 0,988869 | 1,72E-05 |
| MRPL21   | 0,98832  | 4,18E-07 |
| ZC3H11A  | 0,987865 | 0,000873 |
| TMEM87A  | 0,98658  | 1,24E-05 |
| LHPP     | 0,986514 | 0,000794 |
| KCTD3    | 0,984752 | 6,37E-07 |
| COX5A    | 0,984671 | 4,27E-08 |
| LAMTOR4  | 0,984494 | 1,71E-06 |
| HCG18    | 0,983973 | 1,41E-05 |
| PRR14L   | 0,982547 | 2,05E-07 |
| RPL37    | 0,982187 | 0,000108 |
| GPX4     | 0,981843 | 2,83E-09 |
| LRRC8B   | 0,981794 | 0,000852 |
| CNOT3    | 0,9812   | 2,07E-05 |
| MCL1     | 0,978679 | 1,16E-09 |
| GTF2IRD1 | 0,97795  | 2,67E-05 |
| BAG5     | 0,977259 | 5,82E-05 |
| STK32C   | 0,975898 | 0,000441 |
| TP53I13  | 0,975232 | 0,000155 |
| CCDC115  | 0,974605 | 0,000135 |
| ZNF205   | 0,97434  | 9,02E-05 |
| CDK8     | 0,973828 | 3,35E-05 |
| FAM189B  | 0,973278 | 0,000529 |
| ZNF304   | 0,97294  | 0,00036  |
| SETD3    | 0,972708 | 1,07E-06 |
| RBBP5    | 0,971216 | 6,86E-07 |
| TRMT5    | 0,97106  | 4,10E-06 |
| ZNF362   | 0,970758 | 0,000738 |
| DOLK     | 0,97025  | 0,000383 |
| SYPL1    | 0,969505 | 7,20E-06 |

|          |          |          |
|----------|----------|----------|
| RPL30    | 0,967371 | 0,000571 |
| ZBTB1    | 0,966882 | 1,99E-06 |
| RPL13    | 0,96623  | 1,29E-05 |
| FIBP     | 0,966061 | 2,24E-07 |
| RPL31    | 0,965808 | 9,29E-06 |
| SLC25A13 | 0,965507 | 0,000188 |
| SLC25A11 | 0,964586 | 3,07E-06 |
| ERCC3    | 0,962141 | 5,65E-07 |
| VPS28    | 0,961452 | 7,93E-06 |
| SLC10A3  | 0,960473 | 0,000194 |
| AHSA1    | 0,959109 | 1,52E-06 |
| FAM53C   | 0,957808 | 0,000246 |
| ZNF778   | 0,955773 | 0,0007   |
| CTBP2    | 0,955206 | 3,67E-07 |
| TMED10   | 0,954572 | 7,80E-06 |
| CUTC     | 0,954462 | 0,000693 |
| ALKBH1   | 0,954444 | 0,000275 |
| EAPP     | 0,953645 | 7,05E-05 |
| HNRNPA0  | 0,953554 | 1,35E-05 |
| KMT2E    | 0,952828 | 3,35E-05 |
| CBR4     | 0,9524   | 0,000102 |
| UFD1L    | 0,952059 | 9,69E-07 |
| TUG1     | 0,952032 | 3,31E-07 |
| GPATCH4  | 0,951372 | 1,65E-05 |
| MED21    | 0,951282 | 0,00051  |
| BOLA3    | 0,950928 | 8,93E-05 |
| PTPN2    | 0,947897 | 5,39E-06 |
| TOMM6    | 0,947566 | 1,71E-06 |
| XPOT     | 0,94685  | 0,000207 |
| RNF167   | 0,946067 | 1,23E-05 |
| GNPNAT1  | 0,9451   | 1,07E-05 |
| FBXO45   | 0,944722 | 0,00026  |
| PPIL3    | 0,944236 | 0,000641 |
| AP4B1    | 0,942685 | 7,52E-05 |
| DHX34    | 0,942408 | 2,41E-06 |
| ARMCX6   | 0,941122 | 0,000261 |
| AFG3L2   | 0,940707 | 6,55E-08 |
| NDUFB10  | 0,938981 | 1,31E-06 |
| DLGAP5   | 0,938831 | 5,01E-07 |
| FAM207A  | 0,938054 | 1,33E-05 |
| MRPL12   | 0,937528 | 1,25E-07 |
| NSMCE2   | 0,936885 | 0,000242 |
| SARS2    | 0,934582 | 6,18E-06 |
| GCDH     | 0,933717 | 1,55E-05 |
| PIAS4    | 0,931389 | 0,000784 |
| PPP2R5C  | 0,930797 | 1,35E-06 |
| C19orf53 | 0,930456 | 2,96E-06 |
| OPLAH    | 0,928913 | 0,000878 |
| BYSL     | 0,927787 | 0,000492 |
| AIFM1    | 0,927617 | 9,16E-05 |

|           |          |          |
|-----------|----------|----------|
| RBM38     | 0,927068 | 3,92E-06 |
| PPP2R5E   | 0,926382 | 1,03E-07 |
| SNHG6     | 0,926032 | 0,000632 |
| DECR1     | 0,924851 | 2,80E-05 |
| RPS23     | 0,923043 | 0,000221 |
| SAP130    | 0,922851 | 8,39E-08 |
| RANBP9    | 0,922437 | 3,11E-05 |
| RPL39     | 0,922132 | 0,000718 |
| UBTD2     | 0,921821 | 1,52E-05 |
| AFTPH     | 0,920979 | 2,49E-05 |
| HEATR5A   | 0,919727 | 0,000663 |
| PIAS2     | 0,919623 | 5,96E-06 |
| RPL18     | 0,919296 | 6,06E-07 |
| CYC1      | 0,918549 | 5,60E-07 |
| NDUFS6    | 0,918306 | 8,61E-06 |
| AP4M1     | 0,916485 | 0,000403 |
| RPS2      | 0,916294 | 1,44E-09 |
| DNAJC1    | 0,916145 | 0,000133 |
| CDKN3     | 0,915    | 0,000137 |
| ULK1      | 0,914843 | 1,61E-05 |
| TMEM179E  | 0,913146 | 7,94E-05 |
| ALG5      | 0,912499 | 5,58E-05 |
| GLTSCR1L  | 0,912239 | 0,000294 |
| PKMYT1    | 0,909268 | 0,00065  |
| WDR89     | 0,909033 | 0,000297 |
| GCC1      | 0,908116 | 1,61E-05 |
| CLOCK     | 0,907612 | 9,97E-05 |
| NKIRAS2   | 0,905177 | 0,000467 |
| CMC2      | 0,904735 | 0,000359 |
| ELMOD2    | 0,903991 | 0,000221 |
| DSTYK     | 0,903785 | 5,98E-05 |
| PEMT      | 0,901762 | 5,37E-05 |
| ATP5C1    | 0,900746 | 6,33E-07 |
| LOC93622  | 0,899741 | 0,00055  |
| PPIL1     | 0,898993 | 7,90E-06 |
| EEF1B2    | 0,89844  | 0,000634 |
| MRPL30    | 0,898103 | 1,63E-06 |
| C14orf166 | 0,897832 | 1,63E-07 |
| RXRA      | 0,897734 | 0,000796 |
| STAG2     | 0,897455 | 1,75E-07 |
| AP3B1     | 0,896771 | 1,43E-05 |
| PCCB      | 0,896506 | 3,52E-07 |
| UQCRCQ    | 0,896274 | 1,00E-06 |
| LRCH4     | 0,896034 | 6,10E-05 |
| NCBP2-AS2 | 0,895771 | 0,000325 |
| ABT1      | 0,895259 | 9,66E-05 |
| SNAPIN    | 0,893717 | 0,000169 |
| TUBA1A    | 0,892694 | 1,38E-05 |
| HSPA9     | 0,892388 | 0,000521 |
| UQCRCF1   | 0,891828 | 6,06E-07 |

|          |          |          |
|----------|----------|----------|
| PPP1R15B | 0,891465 | 0,000776 |
| C1orf122 | 0,890776 | 0,000697 |
| KIF5B    | 0,890355 | 5,32E-08 |
| NDUFAF6  | 0,890305 | 0,000329 |
| INTS2    | 0,889553 | 5,42E-05 |
| MAPK9    | 0,888888 | 9,04E-06 |
| C9orf64  | 0,888131 | 0,000892 |
| NDUFS2   | 0,887117 | 0,000644 |
| MMAB     | 0,887079 | 3,26E-06 |
| UBE2M    | 0,885781 | 7,70E-07 |
| ATP13A1  | 0,885679 | 6,24E-06 |
| EXOC3    | 0,885558 | 0,000786 |
| PSMA4    | 0,883992 | 0,000205 |
| ALG13    | 0,883042 | 0,000169 |
| WDR20    | 0,882607 | 6,19E-05 |
| NDUFS3   | 0,881621 | 1,54E-05 |
| NDUFC1   | 0,881501 | 0,000296 |
| MARCH5   | 0,880498 | 6,14E-06 |
| MPDU1    | 0,879814 | 0,00019  |
| C12orf45 | 0,87939  | 0,000538 |
| FRA10AC1 | 0,879198 | 0,000432 |
| F11R     | 0,877721 | 1,41E-06 |
| ZNF410   | 0,876063 | 3,08E-05 |
| MRPL27   | 0,872855 | 3,07E-05 |
| H2AFX    | 0,871722 | 8,27E-07 |
| DUSP16   | 0,871463 | 2,57E-05 |
| RPL26L1  | 0,87058  | 6,84E-05 |
| MRPL22   | 0,869973 | 0,0006   |
| ENY2     | 0,869643 | 0,00062  |
| CHCHD10  | 0,868608 | 7,36E-05 |
| UQCR10   | 0,867812 | 0,00055  |
| PRCC     | 0,867502 | 8,36E-07 |
| ZDHHC4   | 0,86709  | 1,86E-05 |
| ZMYND11  | 0,865697 | 1,08E-05 |
| KIAA0101 | 0,864137 | 0,000849 |
| SRA1     | 0,85992  | 0,000611 |
| MAF1     | 0,859768 | 0,000407 |
| NAA38    | 0,857663 | 0,000177 |
| TCF25    | 0,85661  | 3,11E-06 |
| MIDN     | 0,856145 | 7,56E-05 |
| CNPY3    | 0,855934 | 0,000266 |
| GNAS     | 0,853685 | 5,11E-07 |
| RMDN1    | 0,851954 | 0,000157 |
| MRPS5    | 0,850613 | 2,13E-05 |
| WDR55    | 0,848943 | 4,32E-05 |
| ago-02   | 0,847712 | 0,000146 |
| GALK1    | 0,847193 | 0,000212 |
| UBQLN4   | 0,846532 | 1,10E-05 |
| PDHA1    | 0,846452 | 0,000444 |
| CERS2    | 0,846097 | 2,16E-07 |



|          |          |          |
|----------|----------|----------|
| NLN      | 0,845431 | 2,30E-06 |
| KAT2A    | 0,845236 | 4,32E-06 |
| SMIM7    | 0,84497  | 2,07E-05 |
| ZBTB41   | 0,84411  | 0,000293 |
| PSMG3    | 0,843437 | 0,00055  |
| PIAS3    | 0,841313 | 1,07E-05 |
| ANKRD50  | 0,840027 | 9,03E-06 |
| RIOK2    | 0,838104 | 0,00017  |
| CABIN1   | 0,835746 | 0,000707 |
| FAM127C  | 0,830789 | 0,000613 |
| PHAX     | 0,829539 | 5,31E-06 |
| IREB2    | 0,828987 | 3,59E-06 |
| SLC2A4RG | 0,827206 | 0,000131 |
| PPP4R3B  | 0,826459 | 2,19E-06 |
| ZNF282   | 0,825801 | 4,38E-05 |
| CLCC1    | 0,824719 | 0,000314 |
| WRNIP1   | 0,824074 | 0,000805 |
| LARS     | 0,823546 | 1,50E-05 |
| NBPF15   | 0,823295 | 0,000349 |
| SLC25A15 | 0,823039 | 0,000521 |
| MICU2    | 0,822185 | 0,000168 |
| SUV420H1 | 0,821922 | 5,87E-05 |
| ZNF346   | 0,820794 | 0,000779 |
| ZFYVE21  | 0,820688 | 0,00037  |
| MRPS25   | 0,820328 | 4,50E-05 |
| PAK4     | 0,819508 | 0,000182 |
| MED13L   | 0,819435 | 0,000854 |
| DDX39A   | 0,818673 | 1,00E-05 |
| HTATSF1  | 0,817669 | 0,000184 |
| PRPSAP1  | 0,816291 | 0,000813 |
| RBM17    | 0,815868 | 0,000277 |
| ZNF579   | 0,812396 | 0,000941 |
| SNRPF    | 0,811122 | 3,00E-05 |
| PELP1    | 0,810163 | 0,000529 |
| CCDC85B  | 0,808882 | 4,08E-05 |
| SMG9     | 0,807472 | 0,000145 |
| TSEN34   | 0,805847 | 0,000949 |
| ZC3H13   | 0,805105 | 0,000392 |
| RPS3     | 0,804709 | 0,000707 |
| ZNF561   | 0,804374 | 0,00039  |
| DBF4     | 0,804178 | 0,00042  |
| ACAA2    | 0,803519 | 1,39E-05 |
| SLC35B1  | 0,801761 | 0,00025  |
| MLX      | 0,801745 | 0,000101 |
| TMEM167A | 0,8007   | 0,000266 |
| INADL    | 0,800048 | 0,000356 |
| CAMLG    | 0,79974  | 0,000123 |
| GNA13    | 0,799353 | 9,65E-06 |
| MFSD3    | 0,798074 | 0,000581 |
| ISG20L2  | 0,797752 | 3,05E-05 |

|          |          |          |
|----------|----------|----------|
| CFDP1    | 0,797463 | 0,000162 |
| PPP1R16A | 0,797411 | 0,00048  |
| NCBP2    | 0,797139 | 2,47E-06 |
| NCAPG2   | 0,79651  | 0,000779 |
| GPS2     | 0,796508 | 7,07E-06 |
| ADRBK1   | 0,796386 | 0,000707 |
| SEC16A   | 0,795311 | 2,45E-05 |
| GCSH     | 0,793836 | 0,000292 |
| POLR2D   | 0,793419 | 0,000901 |
| PSMC4    | 0,792568 | 3,56E-06 |
| KCMF1    | 0,792513 | 0,001003 |
| S100A10  | 0,792237 | 0,000375 |
| SCD      | 0,790182 | 9,38E-07 |
| SLC25A38 | 0,788391 | 5,90E-05 |
| MDK      | 0,788125 | 3,80E-05 |
| EIF2D    | 0,788031 | 0,000496 |
| KARS     | 0,787161 | 4,62E-05 |
| CLPX     | 0,786442 | 0,000395 |
| PRR14    | 0,786329 | 7,57E-05 |
| SCARB2   | 0,78531  | 0,000685 |
| YIPF3    | 0,783879 | 3,73E-05 |
| PSMC2    | 0,782672 | 1,72E-05 |
| EMD      | 0,77629  | 0,000269 |
| ZBTB10   | 0,775086 | 0,000805 |
| LSM4     | 0,772964 | 2,13E-05 |
| CYBA     | 0,772602 | 0,00079  |
| LIG3     | 0,771732 | 0,000237 |
| ATP5F1   | 0,771702 | 9,47E-05 |
| WDR33    | 0,770247 | 2,81E-05 |
| KCTD20   | 0,768679 | 1,62E-05 |
| NR3C1    | 0,768368 | 0,000642 |
| WDR18    | 0,768121 | 0,000261 |
| POLR2K   | 0,766978 | 0,00051  |
| MRPL4    | 0,76613  | 6,70E-05 |
| USMG5    | 0,765556 | 0,000938 |
| CHD7     | 0,764999 | 0,000599 |
| CARM1    | 0,762975 | 6,95E-05 |
| C17orf62 | 0,761661 | 0,000194 |
| GNL1     | 0,759741 | 0,000211 |
| MIF      | 0,758661 | 0,000156 |
| TOP1     | 0,756221 | 1,64E-06 |
| DNPEP    | 0,755761 | 4,80E-05 |
| ANAPC16  | 0,75383  | 7,86E-05 |
| MRPL11   | 0,753084 | 5,03E-05 |
| PIH1D1   | 0,753016 | 0,000999 |
| DAP3     | 0,752051 | 0,000121 |
| COX4I1   | 0,749034 | 2,38E-06 |
| MRPL35   | 0,746881 | 0,000205 |
| SECISBP2 | 0,744878 | 0,000379 |
| RDH11    | 0,74477  | 0,000632 |

|          |          |          |
|----------|----------|----------|
| BDH1     | 0,74446  | 0,000569 |
| ARMT1    | 0,743979 | 0,000272 |
| STUB1    | 0,743073 | 3,49E-05 |
| DDX6     | 0,740716 | 2,42E-05 |
| AAGAB    | 0,739966 | 7,47E-05 |
| EAF1     | 0,739161 | 9,68E-05 |
| CCNK     | 0,738665 | 0,000793 |
| CANX     | 0,73841  | 5,89E-05 |
| HMBS     | 0,737524 | 0,000299 |
| PEX10    | 0,737099 | 0,000705 |
| ZNF629   | 0,736814 | 5,14E-05 |
| MTMR3    | 0,735175 | 0,000291 |
| RPS19BP1 | 0,734597 | 0,000423 |
| THG1L    | 0,734419 | 0,000721 |
| TUBGCP2  | 0,733836 | 0,000144 |
| RAD50    | 0,732791 | 3,42E-05 |
| MRPL14   | 0,731681 | 0,000216 |
| GID8     | 0,730198 | 3,17E-05 |
| REXO4    | 0,729255 | 0,000233 |
| STRBP    | 0,728722 | 0,000718 |
| COX20    | 0,728153 | 0,000844 |
| RPL21    | 0,727909 | 0,000961 |
| GLTSCR2  | 0,725947 | 0,000151 |
| C12orf10 | 0,718932 | 0,00022  |
| RAD23B   | 0,718866 | 3,36E-05 |
| RPL8     | 0,716547 | 3,07E-06 |
| C1QBP    | 0,716265 | 0,000229 |
| GNB2     | 0,715645 | 0,000384 |
| MECP2    | 0,708642 | 0,000294 |
| WDR61    | 0,708374 | 0,000404 |
| NDUFA6   | 0,708034 | 0,000189 |
| DCAF7    | 0,70594  | 0,000709 |
| MRPL2    | 0,702599 | 0,000383 |
| PAGR1    | 0,701715 | 0,00016  |
| EIF2S1   | 0,700894 | 0,000375 |
| NDUFS8   | 0,699105 | 0,000277 |
| NACC1    | 0,697166 | 0,000434 |
| CAMSAP1  | 0,689931 | 0,000108 |
| BUD31    | 0,689595 | 4,60E-05 |
| SNRPC    | 0,688921 | 0,000206 |
| KMT2D    | 0,686033 | 0,00013  |
| PAIP1    | 0,679327 | 0,000397 |
| C7orf73  | 0,678996 | 0,000309 |
| MORF4L1  | 0,677513 | 0,000124 |
| HACD3    | 0,677368 | 0,000144 |
| EIF2AK1  | 0,677217 | 2,94E-05 |
| CSRNP2   | 0,676407 | 0,000985 |
| NUP88    | 0,671652 | 0,00052  |
| RPL4     | 0,670807 | 0,00031  |
| PPP2CA   | 0,668151 | 0,000122 |

|          |          |          |
|----------|----------|----------|
| EDF1     | 0,667675 | 7,70E-05 |
| TADA3    | 0,666186 | 0,000442 |
| CPNE3    | 0,664527 | 0,000955 |
| PRDX4    | 0,66432  | 0,000414 |
| RBM15B   | 0,662042 | 9,71E-05 |
| PKN1     | 0,659731 | 0,00093  |
| SHFM1    | 0,649253 | 0,000409 |
| SIN3A    | 0,649004 | 0,000216 |
| RPL19    | 0,647367 | 0,000394 |
| ASH1L    | 0,644029 | 0,000702 |
| RPL35    | 0,643317 | 0,000494 |
| PSMD7    | 0,640761 | 0,00022  |
| SART1    | 0,636228 | 0,000744 |
| PLCG1    | 0,635228 | 0,000879 |
| C20orf27 | 0,633264 | 0,000855 |
| AP2S1    | 0,632779 | 0,000961 |
| MRPS2    | 0,632761 | 0,00028  |
| PSMA6    | 0,630599 | 0,000278 |
| RPS24    | 0,629044 | 0,000193 |
| GTF3C5   | 0,620107 | 0,000817 |
| EIF1AX   | 0,619418 | 0,000254 |
| MYO6     | 0,612282 | 0,000644 |
| ERAL1    | 0,607314 | 0,00092  |
| FBL      | 0,605049 | 0,000364 |
| RPL7A    | 0,600538 | 0,000125 |
| H2AFY    | 0,594807 | 0,000847 |
| SERPINB6 | 0,593142 | 0,000917 |
| GRB2     | 0,588154 | 0,000749 |
| MARCKSL1 | 0,578235 | 0,000741 |
| NBN      | 0,575164 | 0,000864 |
| CSNK2B   | 0,562769 | 0,000993 |
| HMGB1    | 0,542306 | 0,000616 |
| DDX5     | 0,539688 | 0,001007 |
| TUBA1B   | -0,51889 | 0,000879 |
| HGS      | -0,58483 | 0,000707 |
| EIF4H    | -0,58846 | 0,000376 |
| CDC20    | -0,58916 | 0,000402 |
| NASP     | -0,58919 | 0,000855 |
| NME4     | -0,59184 | 0,00054  |
| MAP4K4   | -0,59888 | 0,000186 |
| HNRNPD   | -0,59959 | 0,000324 |
| POLD2    | -0,59984 | 0,000827 |
| TPM4     | -0,60694 | 0,000137 |
| DHX30    | -0,60948 | 0,000409 |
| YKT6     | -0,61127 | 0,000789 |
| STAU1    | -0,61483 | 0,000601 |
| DNAJA2   | -0,61528 | 0,000682 |
| EIF6     | -0,62372 | 0,000118 |
| EPRS     | -0,63586 | 0,000162 |
| SPCS1    | -0,64266 | 0,00073  |

|          |          |          |
|----------|----------|----------|
| SF3A1    | -0,6446  | 0,000405 |
| CTNNBL1  | -0,64599 | 0,000464 |
| TEX261   | -0,6475  | 0,000707 |
| NAA25    | -0,65089 | 0,000747 |
| SPATS2   | -0,65299 | 0,000775 |
| GNB1     | -0,65826 | 5,45E-05 |
| AP3D1    | -0,65845 | 6,95E-05 |
| POLR2C   | -0,65964 | 0,000409 |
| CAT      | -0,6648  | 0,000923 |
| VEZF1    | -0,66483 | 0,000932 |
| ANKRD28  | -0,6657  | 0,000439 |
| MGAT4B   | -0,66614 | 0,00017  |
| APMAP    | -0,6713  | 9,21E-05 |
| USP19    | -0,67466 | 0,000529 |
| DDX19A   | -0,67468 | 0,000456 |
| PTGES3   | -0,67509 | 0,00026  |
| NCL      | -0,67574 | 1,29E-05 |
| RANGAP1  | -0,67577 | 8,97E-05 |
| MED15    | -0,67762 | 0,0005   |
| DCTN1    | -0,67851 | 0,000214 |
| MFHAS1   | -0,67933 | 0,000707 |
| EBNA1BP2 | -0,67948 | 6,89E-05 |
| KTN1     | -0,68231 | 0,000336 |
| CD164    | -0,68337 | 0,000389 |
| BOP1     | -0,68366 | 5,43E-05 |
| AKIRIN1  | -0,68382 | 0,000929 |
| YBX3     | -0,68516 | 0,000701 |
| ATXN10   | -0,68553 | 0,000191 |
| TXNDC12  | -0,68587 | 0,00061  |
| DNAJC14  | -0,68639 | 0,000887 |
| CNPY2    | -0,68925 | 0,000274 |
| TMEM164  | -0,69985 | 0,00088  |
| IARS2    | -0,7024  | 4,36E-05 |
| JOSD1    | -0,70266 | 0,000404 |
| RANBP3   | -0,70445 | 0,000163 |
| BCL2L13  | -0,70522 | 0,000835 |
| HN1L     | -0,70601 | 1,92E-05 |
| G3BP1    | -0,70635 | 1,47E-05 |
| UBXN6    | -0,7079  | 0,000186 |
| ATG3     | -0,708   | 0,000273 |
| KDSR     | -0,7104  | 0,000541 |
| LAPTM4A  | -0,71123 | 0,000108 |
| MFN2     | -0,71249 | 9,92E-05 |
| ITPA     | -0,71571 | 0,000609 |
| UBE2J1   | -0,71714 | 0,000163 |
| PANX1    | -0,71726 | 0,000426 |
| GART     | -0,71796 | 4,68E-05 |
| MLH1     | -0,72313 | 0,000211 |
| XRN2     | -0,72485 | 3,65E-05 |
| KIF21A   | -0,72504 | 0,000279 |

|         |          |          |
|---------|----------|----------|
| SLC20A2 | -0,72735 | 0,00073  |
| MKL1    | -0,73091 | 0,000512 |
| ATP2C1  | -0,73321 | 8,25E-05 |
| PTPN12  | -0,73329 | 3,91E-05 |
| DSN1    | -0,73385 | 0,000705 |
| DDX52   | -0,73396 | 0,000786 |
| FBXO21  | -0,73505 | 0,000442 |
| GOPC    | -0,74182 | 0,000743 |
| RAC1    | -0,74212 | 3,18E-06 |
| PCGF5   | -0,74244 | 0,00027  |
| NPC1    | -0,74248 | 0,000561 |
| MAP3K7  | -0,74255 | 0,000247 |
| ECT2    | -0,74352 | 2,01E-05 |
| VAV2    | -0,74566 | 0,000482 |
| HERC2   | -0,74612 | 4,75E-05 |
| CDC42   | -0,74736 | 0,000103 |
| C2CD3   | -0,74813 | 0,000281 |
| GSPT1   | -0,74872 | 6,72E-05 |
| KPNA1   | -0,7489  | 0,000846 |
| RER1    | -0,74933 | 0,000136 |
| USP16   | -0,75049 | 0,000722 |
| RNF185  | -0,75376 | 0,000951 |
| GFM1    | -0,7541  | 5,63E-05 |
| RPS6KA3 | -0,75428 | 0,000208 |
| COX15   | -0,7551  | 6,70E-05 |
| COPS7A  | -0,75589 | 0,000261 |
| MPZL1   | -0,75733 | 2,45E-05 |
| SLC35B4 | -0,75753 | 0,000271 |
| VPS35   | -0,75915 | 5,33E-06 |
| VPS36   | -0,75938 | 0,000279 |
| CRTAP   | -0,76013 | 2,26E-06 |
| PPP1CC  | -0,76163 | 0,000317 |
| ASXL1   | -0,76305 | 3,78E-05 |
| NPRL3   | -0,76391 | 1,68E-05 |
| ATF2    | -0,7679  | 0,000241 |
| U2SURP  | -0,77089 | 5,93E-06 |
| IMPAD1  | -0,77161 | 2,49E-05 |
| CEP41   | -0,77221 | 0,000313 |
| TWSG1   | -0,77232 | 0,000258 |
| USP33   | -0,77563 | 0,000289 |
| HUWE1   | -0,77631 | 1,91E-06 |
| CMIP    | -0,77741 | 0,000407 |
| SMARCC1 | -0,7782  | 1,58E-06 |
| CCT8    | -0,77882 | 2,03E-06 |
| RUNX1   | -0,77911 | 0,000189 |
| TFDP1   | -0,77957 | 9,61E-06 |
| ELP6    | -0,77999 | 0,000275 |
| DIS3    | -0,782   | 0,000138 |
| CFLAR   | -0,78273 | 0,000101 |
| DENR    | -0,78317 | 9,78E-06 |

|          |          |          |
|----------|----------|----------|
| COASY    | -0,78507 | 1,67E-05 |
| NONO     | -0,78522 | 0,000206 |
| SLC33A1  | -0,78523 | 0,00084  |
| PPP1R9B  | -0,78798 | 5,51E-06 |
| CD2AP    | -0,78811 | 8,50E-05 |
| DNM1L    | -0,7893  | 4,90E-06 |
| PDPR     | -0,79051 | 0,000121 |
| RAD18    | -0,79104 | 0,000108 |
| CYFIP1   | -0,79349 | 8,08E-06 |
| PDZD8    | -0,79358 | 1,66E-05 |
| IFRD2    | -0,79398 | 4,79E-06 |
| RPS26    | -0,79406 | 0,000979 |
| ZMYM4    | -0,79426 | 1,05E-05 |
| GXYLT1   | -0,79536 | 0,00048  |
| EIF3M    | -0,79592 | 1,61E-05 |
| SMC1A    | -0,79698 | 0,000208 |
| HMGXB4   | -0,79773 | 0,000137 |
| ZFAND5   | -0,79844 | 9,10E-05 |
| FAM192A  | -0,79861 | 4,93E-05 |
| CNP      | -0,79862 | 0,000648 |
| C11orf84 | -0,79997 | 0,000166 |
| COL18A1  | -0,80002 | 1,13E-05 |
| FPGS     | -0,8019  | 0,000301 |
| QRICH1   | -0,80208 | 7,64E-05 |
| TAF5L    | -0,80259 | 0,000246 |
| SH3GLB1  | -0,80298 | 0,000521 |
| ARHGAP21 | -0,80327 | 0,000235 |
| NCAPD2   | -0,80361 | 8,43E-05 |
| CLDN12   | -0,80402 | 0,000293 |
| NUS1     | -0,80581 | 0,000496 |
| AHDC1    | -0,80651 | 0,000721 |
| GOLGA4   | -0,80662 | 0,000269 |
| OSBPL10  | -0,80671 | 3,76E-05 |
| RABEP1   | -0,80795 | 0,000282 |
| STT3A    | -0,80886 | 0,000426 |
| ARFGEF2  | -0,80897 | 8,78E-06 |
| RFC1     | -0,80953 | 3,66E-05 |
| UBE2E3   | -0,80957 | 0,00027  |
| SLC12A7  | -0,81062 | 0,000101 |
| CLSPN    | -0,8112  | 3,18E-05 |
| MAGI1    | -0,81132 | 0,000348 |
| TMEM230  | -0,81147 | 0,000204 |
| ALKBH3   | -0,81151 | 0,0008   |
| EIF4G3   | -0,8129  | 6,37E-06 |
| CIAPIN1  | -0,81504 | 2,11E-05 |
| ZYG11B   | -0,8151  | 0,000449 |
| UBAC2    | -0,81522 | 0,000346 |
| RHOBTB3  | -0,81709 | 5,55E-05 |
| TTLL4    | -0,81817 | 0,000719 |
| BAIAP2L1 | -0,81818 | 6,39E-05 |

|          |          |          |
|----------|----------|----------|
| C22orf29 | -0,8201  | 0,000256 |
| NPC2     | -0,82109 | 0,000143 |
| ZFP91    | -0,82151 | 4,92E-05 |
| LRRC42   | -0,82232 | 0,000187 |
| FAH      | -0,82248 | 0,000172 |
| SUN2     | -0,826   | 0,000162 |
| TUSC2    | -0,82682 | 0,000854 |
| AGPAT5   | -0,82689 | 1,70E-05 |
| TERF2    | -0,82821 | 0,000443 |
| IFT57    | -0,82853 | 4,98E-05 |
| MCPH1    | -0,82866 | 0,000838 |
| DES12    | -0,82915 | 0,000247 |
| GLRX3    | -0,8302  | 7,40E-06 |
| OSBP     | -0,83042 | 5,58E-05 |
| UBQLN2   | -0,83104 | 6,20E-05 |
| TRIM25   | -0,83175 | 0,000447 |
| OGFR     | -0,83209 | 0,000773 |
| REV3L    | -0,83289 | 0,000117 |
| KHSRP    | -0,83292 | 1,97E-07 |
| GORASP1  | -0,83396 | 0,000363 |
| TRMT6    | -0,83533 | 7,51E-05 |
| NFKBIA   | -0,83561 | 0,000412 |
| PPP3CA   | -0,83575 | 0,000146 |
| PSMB2    | -0,83639 | 1,15E-06 |
| ANKRD40  | -0,83911 | 0,000768 |
| PUM1     | -0,83949 | 8,61E-06 |
| CAPRIN1  | -0,83989 | 7,56E-08 |
| DMTN     | -0,84043 | 0,000695 |
| KIAA1468 | -0,84304 | 0,000258 |
| GNPAT    | -0,84358 | 3,44E-05 |
| NSL1     | -0,84419 | 0,000385 |
| DR1      | -0,84446 | 3,54E-05 |
| DYNC1I2  | -0,845   | 4,47E-05 |
| FEN1     | -0,84552 | 1,28E-06 |
| AGPAT3   | -0,84581 | 0,000222 |
| ATP6V1H  | -0,84723 | 0,000189 |
| YIPF6    | -0,84845 | 9,27E-05 |
| FAM208A  | -0,84916 | 0,000187 |
| FGD6     | -0,84932 | 0,000567 |
| TSG101   | -0,8497  | 0,000375 |
| DCTD     | -0,84981 | 6,82E-06 |
| TXNDC11  | -0,85012 | 6,02E-05 |
| PARP2    | -0,85107 | 8,36E-05 |
| SPAG9    | -0,85112 | 0,000785 |
| SUZ12    | -0,85116 | 1,87E-06 |
| LAMP1    | -0,85129 | 0,000143 |
| STAT2    | -0,85129 | 0,000853 |
| LAP3     | -0,85254 | 0,000392 |
| RGS10    | -0,85402 | 0,000327 |
| SNX3     | -0,8546  | 0,00041  |



|          |          |          |
|----------|----------|----------|
| ADD1     | -0,85486 | 9,51E-05 |
| COPRS    | -0,85776 | 4,01E-05 |
| GLUD1    | -0,85828 | 3,58E-07 |
| PSMA2    | -0,85877 | 8,44E-07 |
| RNF26    | -0,8593  | 2,40E-05 |
| KANK2    | -0,85978 | 8,69E-05 |
| DCPS     | -0,86001 | 0,000134 |
| MYO5B    | -0,86028 | 0,000323 |
| DDA1     | -0,86063 | 0,000187 |
| TMEM41A  | -0,86169 | 5,43E-05 |
| OXSR1    | -0,86226 | 0,000133 |
| PFN2     | -0,86344 | 6,31E-07 |
| VPS41    | -0,86351 | 0,000722 |
| FGFR1OP2 | -0,86354 | 0,000359 |
| MAP1LC3B | -0,86405 | 3,49E-05 |
| TPRA1    | -0,86809 | 1,97E-05 |
| UBE2J2   | -0,86865 | 5,39E-06 |
| ASAP2    | -0,87025 | 8,58E-06 |
| NCKAP1   | -0,87111 | 6,37E-07 |
| LPGAT1   | -0,8713  | 0,000317 |
| SMARCA2  | -0,87147 | 0,000582 |
| LTBR     | -0,87221 | 1,24E-07 |
| PPTC7    | -0,87223 | 0,000285 |
| ACD      | -0,87276 | 0,000116 |
| CDK2     | -0,87333 | 3,18E-05 |
| TMED7    | -0,87481 | 7,63E-05 |
| SHROOM3  | -0,87482 | 7,26E-06 |
| TUBGCP3  | -0,87519 | 0,00025  |
| RALGAPA2 | -0,87538 | 0,000582 |
| SH3PXD2B | -0,87579 | 0,000334 |
| NUP37    | -0,87689 | 0,000128 |
| TMEM201  | -0,87694 | 0,000482 |
| UACA     | -0,87867 | 0,000735 |
| SRC      | -0,88019 | 7,20E-06 |
| RNF216   | -0,88026 | 0,000127 |
| PICALM   | -0,88142 | 2,59E-06 |
| SERTAD2  | -0,88227 | 2,73E-05 |
| AP2M1    | -0,88248 | 0,000492 |
| SMURF2   | -0,88262 | 8,91E-05 |
| ST13     | -0,88318 | 4,20E-06 |
| PDHB     | -0,88357 | 0,000722 |
| PLCG2    | -0,88475 | 0,000965 |
| GALNT1   | -0,88597 | 5,52E-07 |
| WNK1     | -0,88677 | 3,20E-08 |
| TANC1    | -0,88792 | 1,77E-06 |
| ALG9     | -0,88823 | 9,68E-05 |
| MANF     | -0,89141 | 1,20E-06 |
| SAAL1    | -0,89154 | 1,10E-05 |
| PEBP1    | -0,89249 | 1,06E-08 |
| FBXO30   | -0,893   | 0,000825 |

|          |          |          |
|----------|----------|----------|
| NUTF2    | -0,89346 | 4,36E-05 |
| TSPO     | -0,89349 | 1,06E-06 |
| PTK2     | -0,89623 | 1,69E-07 |
| ATRN     | -0,89642 | 8,86E-05 |
| CCDC34   | -0,89818 | 0,000305 |
| KCTD9    | -0,89833 | 0,000131 |
| MDN1     | -0,89837 | 6,20E-07 |
| EGLN1    | -0,89932 | 4,27E-05 |
| ENO1     | -0,89966 | 0,000551 |
| SMAD4    | -0,90131 | 6,03E-06 |
| NOL4L    | -0,90135 | 0,000306 |
| DDX19B   | -0,9014  | 1,90E-05 |
| RHOT1    | -0,90235 | 2,34E-05 |
| VPRBP    | -0,90277 | 2,42E-06 |
| CCDC93   | -0,90305 | 0,000623 |
| PTPN9    | -0,90402 | 0,000108 |
| TMEM184F | -0,90412 | 1,62E-05 |
| BROX     | -0,90474 | 1,46E-05 |
| CWC15    | -0,90612 | 8,33E-05 |
| NAGPA    | -0,90621 | 0,000503 |
| TBC1D22A | -0,90627 | 0,00049  |
| TRIM32   | -0,9063  | 0,000105 |
| LAMC1    | -0,90632 | 1,17E-06 |
| ESCO2    | -0,9073  | 0,000774 |
| EXOSC7   | -0,90905 | 3,43E-05 |
| ELP4     | -0,90976 | 0,000638 |
| HIP1R    | -0,91073 | 7,47E-06 |
| FANCD2   | -0,9131  | 0,000417 |
| LRRC14   | -0,91405 | 0,000268 |
| CEP164   | -0,91436 | 8,42E-06 |
| TMEM109  | -0,91609 | 1,43E-06 |
| UFL1     | -0,91636 | 0,00074  |
| USP31    | -0,91825 | 0,000129 |
| NLE1     | -0,92055 | 0,000465 |
| FBXL5    | -0,92166 | 4,42E-05 |
| RAP1GDS1 | -0,92207 | 1,16E-05 |
| NIN      | -0,92436 | 6,57E-05 |
| HAUS6    | -0,92453 | 2,86E-05 |
| ARID4B   | -0,92741 | 0,000828 |
| GNA11    | -0,92907 | 1,34E-06 |
| DHX32    | -0,92965 | 0,000327 |
| WASL     | -0,92966 | 1,04E-06 |
| DUSP14   | -0,9297  | 1,96E-05 |
| GANAB    | -0,93087 | 1,47E-09 |
| NCLN     | -0,9316  | 2,52E-08 |
| TAB2     | -0,93263 | 1,79E-07 |
| SSRP1    | -0,93348 | 2,64E-07 |
| TOPBP1   | -0,93584 | 1,09E-06 |
| MINA     | -0,93673 | 1,71E-05 |
| DENND4C  | -0,94341 | 3,63E-05 |

|          |          |          |
|----------|----------|----------|
| URB1     | -0,94405 | 2,82E-06 |
| ATP5G1   | -0,94483 | 1,87E-05 |
| ZDHHC7   | -0,94488 | 7,42E-06 |
| MCU      | -0,94566 | 0,000231 |
| SUCLA2   | -0,94597 | 5,60E-05 |
| TNKS     | -0,94608 | 3,39E-06 |
| BAG4     | -0,94755 | 3,32E-05 |
| SMARCD1  | -0,94784 | 8,69E-08 |
| EIF3D    | -0,94837 | 2,53E-06 |
| GTF2H3   | -0,94892 | 0,000146 |
| SBNO2    | -0,94933 | 2,27E-05 |
| ENTPD6   | -0,94937 | 1,68E-07 |
| DNTTIP1  | -0,94941 | 9,25E-05 |
| OSBPL9   | -0,95008 | 1,32E-07 |
| SLC20A1  | -0,95091 | 6,18E-08 |
| ASXL2    | -0,95098 | 8,99E-05 |
| RIMKLB   | -0,95124 | 3,97E-05 |
| GLB1     | -0,95126 | 0,000109 |
| C11orf58 | -0,9519  | 8,48E-09 |
| MUL1     | -0,9534  | 2,82E-05 |
| VASP     | -0,95381 | 3,03E-07 |
| ADGRG1   | -0,95399 | 2,62E-07 |
| ITPR3    | -0,95567 | 6,01E-05 |
| BNIP2    | -0,95656 | 8,92E-05 |
| KIAA1524 | -0,95718 | 4,64E-05 |
| USP47    | -0,95846 | 4,61E-06 |
| TMEM261  | -0,95857 | 9,73E-06 |
| INF2     | -0,95971 | 2,70E-05 |
| FAM168A  | -0,96101 | 0,000162 |
| PTER     | -0,96154 | 0,000195 |
| ATG16L1  | -0,96201 | 2,47E-05 |
| PDHX     | -0,96403 | 0,000171 |
| SH3GL1   | -0,96418 | 4,03E-05 |
| RAB34    | -0,96461 | 0,000371 |
| ATP8B1   | -0,96486 | 7,57E-07 |
| DYNC1H1  | -0,96541 | 4,92E-07 |
| CMSS1    | -0,96542 | 3,20E-05 |
| DEXI     | -0,96732 | 0,000614 |
| RNH1     | -0,96752 | 0,000604 |
| RPUSD4   | -0,96764 | 0,000288 |
| TMF1     | -0,96955 | 0,000494 |
| RALA     | -0,97152 | 5,15E-08 |
| PTPN3    | -0,97204 | 1,15E-05 |
| ALDH1B1  | -0,9728  | 7,88E-08 |
| P4HA1    | -0,97293 | 2,64E-06 |
| UBA6     | -0,9741  | 2,90E-07 |
| IBTK     | -0,97432 | 5,42E-07 |
| TNPO1    | -0,97434 | 2,87E-08 |
| PNP      | -0,97509 | 1,30E-06 |
| CHAF1A   | -0,97609 | 1,60E-05 |

|          |          |          |
|----------|----------|----------|
| PDCD6IP  | -0,97711 | 2,28E-09 |
| TBC1D5   | -0,97715 | 7,24E-07 |
| STT3B    | -0,97793 | 1,16E-05 |
| NCOR2    | -0,97805 | 9,39E-07 |
| MIA3     | -0,97837 | 9,19E-07 |
| KDM5C    | -0,97948 | 2,20E-08 |
| HPS3     | -0,98013 | 1,01E-05 |
| SNN      | -0,98021 | 2,94E-05 |
| DNAJC10  | -0,98024 | 5,34E-06 |
| APLP2    | -0,98066 | 2,50E-10 |
| RETSAT   | -0,98125 | 5,78E-07 |
| PLEKHM2  | -0,98188 | 1,48E-07 |
| USP15    | -0,98285 | 4,99E-07 |
| HBS1L    | -0,98312 | 2,10E-07 |
| PLCB3    | -0,98374 | 1,83E-05 |
| LRRFIP2  | -0,98519 | 3,16E-06 |
| PITPNB   | -0,9871  | 1,66E-08 |
| LRP6     | -0,98804 | 8,10E-06 |
| UTP20    | -0,98854 | 7,88E-06 |
| PCNP     | -0,98859 | 8,76E-07 |
| CLDND1   | -0,98908 | 0,000177 |
| ITCH     | -0,98974 | 4,15E-08 |
| ZGPAT    | -0,99099 | 2,15E-05 |
| IRF2     | -0,9917  | 0,00027  |
| ZDHHC8   | -0,99268 | 0,000203 |
| DYNLT1   | -0,99281 | 2,21E-06 |
| PKN2     | -0,99319 | 0,000183 |
| GOLIM4   | -0,99413 | 8,13E-08 |
| LMAN1    | -0,99458 | 1,68E-05 |
| PKM      | -0,99461 | 8,98E-07 |
| XPO6     | -0,99545 | 5,34E-10 |
| PXMP2    | -0,99558 | 0,000437 |
| ZNF343   | -0,99638 | 0,000192 |
| XRR1     | -0,99784 | 0,000978 |
| PHF19    | -0,99791 | 3,43E-06 |
| GPKOW    | -0,9993  | 0,000293 |
| GNPDA1   | -0,99952 | 0,000381 |
| DDHD2    | -1,0016  | 2,50E-06 |
| TBC1D23  | -1,00183 | 0,000421 |
| C11orf57 | -1,00189 | 9,90E-06 |
| BTBD3    | -1,00201 | 4,51E-05 |
| EP400    | -1,00274 | 6,19E-09 |
| PROSC    | -1,00345 | 1,11E-05 |
| ANKS6    | -1,00371 | 8,11E-07 |
| DIS3L2   | -1,0042  | 3,03E-06 |
| TFDP2    | -1,00434 | 1,08E-06 |
| STK24    | -1,0067  | 9,76E-10 |
| DIRC2    | -1,00727 | 0,000722 |
| HMOX2    | -1,00781 | 0,000251 |
| CNOT6L   | -1,00863 | 1,65E-05 |

|           |          |          |
|-----------|----------|----------|
| DCP1B     | -1,00888 | 0,000575 |
| PIK3R4    | -1,0118  | 2,09E-06 |
| C6orf132  | -1,01236 | 8,85E-07 |
| ADCY3     | -1,01343 | 5,76E-08 |
| SNRK      | -1,01481 | 1,52E-05 |
| SNTB1     | -1,01554 | 2,30E-08 |
| SPOP      | -1,01566 | 3,20E-05 |
| NUDC      | -1,01589 | 0,00046  |
| RNF111    | -1,01631 | 6,05E-07 |
| TTC7B     | -1,01676 | 8,96E-05 |
| RRM1      | -1,01826 | 2,36E-06 |
| PRPS1     | -1,01843 | 0,000133 |
| EIF5A2    | -1,01888 | 0,00011  |
| IFT172    | -1,0194  | 0,000224 |
| NOL6      | -1,01992 | 4,35E-05 |
| NUP93     | -1,02029 | 4,10E-09 |
| CRLS1     | -1,02122 | 6,89E-06 |
| SH3BP5L   | -1,02136 | 1,61E-06 |
| PRDX3     | -1,02348 | 4,82E-07 |
| C11orf31  | -1,02372 | 3,22E-07 |
| KIAA0319L | -1,02373 | 0,000981 |
| CIRH1A    | -1,02412 | 0,000222 |
| TBC1D2B   | -1,02485 | 9,75E-06 |
| TOMM20    | -1,02539 | 6,35E-10 |
| TBCEL     | -1,02575 | 0,000354 |
| POLA2     | -1,02601 | 0,000626 |
| LIMD1     | -1,02633 | 6,89E-05 |
| EPS8      | -1,0266  | 2,34E-07 |
| MT1X      | -1,02748 | 0,000158 |
| NAP1L4    | -1,02839 | 7,21E-10 |
| SMTN      | -1,03053 | 1,31E-07 |
| KITLG     | -1,03105 | 1,01E-06 |
| MED14     | -1,03135 | 1,09E-07 |
| RYK       | -1,03168 | 1,07E-05 |
| COMMD7    | -1,03261 | 3,81E-06 |
| FRMD8     | -1,03454 | 6,38E-05 |
| TNFRSF21  | -1,03703 | 8,70E-08 |
| PDP2      | -1,03761 | 0,000107 |
| IMPA1     | -1,03829 | 0,000928 |
| BRD7      | -1,03864 | 5,27E-08 |
| CD46      | -1,0398  | 1,22E-06 |
| STK17B    | -1,04044 | 0,000692 |
| APEH      | -1,04067 | 2,75E-06 |
| METTL3    | -1,04106 | 6,31E-06 |
| ABL2      | -1,04128 | 1,41E-08 |
| TLDC1     | -1,04161 | 0,000617 |
| NCOA4     | -1,04169 | 1,19E-06 |
| FAM200B   | -1,042   | 0,000704 |
| POLE      | -1,04315 | 4,21E-07 |
| NUDCD3    | -1,04328 | 3,64E-08 |

|          |          |          |
|----------|----------|----------|
| PTP4A2   | -1,04331 | 3,97E-08 |
| MGAT5    | -1,04374 | 1,17E-05 |
| SC5D     | -1,0442  | 0,00074  |
| MED8     | -1,04438 | 4,72E-05 |
| HIATL1   | -1,04441 | 1,42E-06 |
| CENPW    | -1,04568 | 0,000293 |
| PCED1A   | -1,04588 | 0,000537 |
| MAP3K4   | -1,04706 | 6,19E-06 |
| ZNF330   | -1,04803 | 8,69E-08 |
| NFU1     | -1,04944 | 4,47E-05 |
| WDR4     | -1,04998 | 1,23E-05 |
| PACS1    | -1,0502  | 3,92E-08 |
| MEN1     | -1,05046 | 9,99E-08 |
| ELOVL5   | -1,05209 | 1,23E-09 |
| EPG5     | -1,05248 | 5,91E-05 |
| CNKSR3   | -1,05364 | 0,000632 |
| COPS7B   | -1,05385 | 5,62E-06 |
| PTPN23   | -1,05477 | 3,87E-09 |
| RRP9     | -1,05497 | 1,31E-07 |
| ACTN4    | -1,05612 | 3,14E-05 |
| FOCAD    | -1,05866 | 6,01E-08 |
| BOK      | -1,05931 | 2,09E-05 |
| PHRF1    | -1,05983 | 3,42E-10 |
| BIN3     | -1,05987 | 0,000851 |
| USP13    | -1,06038 | 4,09E-08 |
| PANK4    | -1,0613  | 7,31E-05 |
| SLC25A26 | -1,06259 | 0,000281 |
| PNPO     | -1,06259 | 3,14E-08 |
| MAGT1    | -1,06262 | 1,70E-08 |
| CLEC16A  | -1,06338 | 2,27E-07 |
| OTUD4    | -1,06483 | 4,44E-05 |
| PRKAA1   | -1,06667 | 0,000198 |
| WWC1     | -1,06843 | 0,000161 |
| FGD1     | -1,06875 | 2,89E-07 |
| MSANTD4  | -1,06944 | 0,000629 |
| DLG1     | -1,0725  | 9,40E-08 |
| ARID1B   | -1,07373 | 1,25E-06 |
| POLR3G   | -1,07384 | 0,000948 |
| FXR1     | -1,07426 | 2,91E-06 |
| NLRX1    | -1,07685 | 2,65E-06 |
| RBL2     | -1,07696 | 1,04E-07 |
| HSDL2    | -1,07716 | 0,00014  |
| MGRN1    | -1,07852 | 3,62E-09 |
| CTDSP2   | -1,07931 | 3,44E-05 |
| FTSJ1    | -1,07942 | 2,87E-08 |
| SNX30    | -1,07981 | 4,68E-05 |
| ARL14EP  | -1,08015 | 6,29E-05 |
| CMTM6    | -1,0809  | 7,83E-08 |
| ABRACL   | -1,08109 | 2,42E-06 |
| ETNK1    | -1,08173 | 1,69E-06 |

|           |          |          |
|-----------|----------|----------|
| SUN1      | -1,08331 | 7,25E-09 |
| C21orf2   | -1,08357 | 0,000217 |
| UXS1      | -1,08681 | 1,79E-08 |
| FNIP1     | -1,08716 | 7,89E-07 |
| FGFRL1    | -1,08738 | 4,29E-10 |
| SPRED2    | -1,08757 | 8,37E-07 |
| GADD45A   | -1,08781 | 0,000104 |
| ITSN2     | -1,08784 | 9,59E-05 |
| KPNA3     | -1,08813 | 1,17E-05 |
| MIR4435-2 | -1,08858 | 0,000973 |
| SPTAN1    | -1,08964 | 1,05E-08 |
| ATXN2     | -1,08993 | 5,02E-08 |
| KPNA6     | -1,09135 | 1,44E-08 |
| STK25     | -1,09148 | 2,25E-09 |
| FAM49B    | -1,09158 | 2,30E-09 |
| SVIL      | -1,09163 | 6,08E-05 |
| RAB3GAP2  | -1,09295 | 6,59E-08 |
| NOCT      | -1,0939  | 8,20E-05 |
| PTGFRN    | -1,09491 | 5,28E-09 |
| NAE1      | -1,0951  | 1,52E-09 |
| CLP1      | -1,09923 | 0,000178 |
| BET1L     | -1,09984 | 4,12E-06 |
| TALDO1    | -1,10004 | 3,86E-07 |
| USP24     | -1,10016 | 1,65E-07 |
| POLR2L    | -1,10223 | 4,58E-07 |
| VPS26B    | -1,10303 | 1,19E-05 |
| SLC6A6    | -1,10356 | 4,51E-10 |
| VAC14     | -1,10415 | 3,67E-10 |
| CSNK2A1   | -1,10454 | 2,95E-10 |
| GSTO1     | -1,1048  | 1,19E-05 |
| KNTC1     | -1,10505 | 0,000837 |
| SLBP      | -1,10595 | 3,42E-07 |
| HIBADH    | -1,10673 | 2,94E-08 |
| FLII      | -1,10721 | 3,96E-11 |
| GTPBP1    | -1,10759 | 4,38E-07 |
| COMMD9    | -1,10763 | 0,000209 |
| TRAF3     | -1,10856 | 1,74E-07 |
| B3GALNT2  | -1,10932 | 2,29E-06 |
| MELK      | -1,1097  | 4,54E-09 |
| ST7       | -1,11012 | 2,68E-05 |
| DRAP1     | -1,11069 | 9,65E-09 |
| PDIA5     | -1,11129 | 1,33E-06 |
| FER       | -1,1114  | 2,52E-05 |
| SMS       | -1,11249 | 5,18E-06 |
| HTATIP2   | -1,11274 | 0,000225 |
| PARP4     | -1,11303 | 5,58E-11 |
| DOCK7     | -1,1131  | 1,70E-08 |
| TMEM219   | -1,11371 | 2,05E-05 |
| CNOT1     | -1,11427 | 1,69E-11 |
| XPC       | -1,11463 | 3,23E-08 |

|          |          |          |
|----------|----------|----------|
| EXOC6B   | -1,11479 | 0,000183 |
| DCUN1D5  | -1,11532 | 8,09E-08 |
| WASF2    | -1,11664 | 1,78E-11 |
| RRAGC    | -1,11667 | 1,89E-05 |
| MBOAT2   | -1,11683 | 1,57E-05 |
| USP9X    | -1,11717 | 1,68E-06 |
| BCL9L    | -1,118   | 2,29E-05 |
| TRAM1    | -1,11961 | 0,00024  |
| CDC25A   | -1,11998 | 2,72E-06 |
| STARD4   | -1,12081 | 8,80E-06 |
| PRELID2  | -1,12093 | 0,000617 |
| LDLR     | -1,12132 | 4,12E-09 |
| ZBTB44   | -1,12256 | 3,27E-05 |
| SIK3     | -1,12296 | 2,93E-08 |
| SNX33    | -1,12319 | 1,87E-06 |
| MSRB1    | -1,12409 | 4,99E-05 |
| COPS8    | -1,12494 | 4,11E-07 |
| TMEM104  | -1,12568 | 0,000341 |
| CLTA     | -1,12589 | 4,82E-09 |
| ATOX1    | -1,12628 | 0,000668 |
| TMEM41B  | -1,12634 | 1,82E-05 |
| SH3KBP1  | -1,12651 | 0,000941 |
| TARBP1   | -1,1301  | 0,000414 |
| TMEM50B  | -1,13052 | 0,000456 |
| ENKD1    | -1,13085 | 0,000375 |
| LRRC16A  | -1,13096 | 0,000659 |
| NUP133   | -1,13128 | 4,84E-09 |
| PJA1     | -1,13291 | 0,000402 |
| PGM2     | -1,13483 | 1,09E-07 |
| TMED4    | -1,13642 | 1,04E-09 |
| RNF19A   | -1,13692 | 2,79E-05 |
| TMEM245  | -1,13958 | 1,95E-08 |
| CHFR     | -1,14023 | 1,54E-06 |
| OSBPL11  | -1,14028 | 3,13E-05 |
| TM7SF3   | -1,14072 | 1,18E-05 |
| THYN1    | -1,14074 | 1,24E-05 |
| RIC8A    | -1,14112 | 5,86E-12 |
| SMC4     | -1,14163 | 1,56E-08 |
| ANXA5    | -1,14443 | 2,25E-13 |
| ERI1     | -1,1446  | 1,49E-07 |
| DCP1A    | -1,14478 | 0,000367 |
| SBDS     | -1,14561 | 2,61E-09 |
| TTC17    | -1,14585 | 5,62E-10 |
| ADIPOR2  | -1,14665 | 7,83E-11 |
| PAFAH1B2 | -1,14675 | 1,46E-09 |
| USP53    | -1,14699 | 2,55E-06 |
| PDLIM7   | -1,14969 | 3,52E-07 |
| RABGEF1  | -1,1509  | 2,33E-08 |
| ACAD10   | -1,15215 | 3,79E-07 |
| AAK1     | -1,15346 | 0,00017  |



|          |          |          |
|----------|----------|----------|
| PLEKHA6  | -1,15443 | 8,67E-08 |
| CLCN7    | -1,15669 | 5,96E-09 |
| SLC41A1  | -1,15963 | 9,11E-07 |
| LRRC40   | -1,16053 | 7,95E-06 |
| TGOLN2   | -1,16069 | 1,82E-08 |
| AGRN     | -1,16096 | 2,25E-06 |
| NCSTN    | -1,16101 | 7,46E-11 |
| ATP1B3   | -1,1611  | 1,28E-12 |
| ATP11A   | -1,16164 | 2,55E-05 |
| DNAJC5   | -1,16176 | 5,08E-06 |
| MKLN1    | -1,16223 | 2,12E-10 |
| ESYT1    | -1,1625  | 1,49E-13 |
| C4orf46  | -1,16276 | 3,80E-05 |
| NECAP2   | -1,16288 | 1,48E-08 |
| ATR      | -1,16292 | 4,44E-09 |
| TRAF3IP2 | -1,16359 | 1,88E-05 |
| CEP57    | -1,16643 | 7,19E-05 |
| TCTN2    | -1,16655 | 1,49E-06 |
| DZIP3    | -1,16688 | 1,26E-07 |
| RB1      | -1,16693 | 4,75E-08 |
| GNPTAB   | -1,16877 | 2,05E-09 |
| SHQ1     | -1,16912 | 4,47E-06 |
| SP140L   | -1,16958 | 2,06E-06 |
| HEATR3   | -1,17036 | 5,29E-05 |
| SLC9A1   | -1,17084 | 5,34E-10 |
| TAPBP    | -1,17177 | 0,000468 |
| NFKBIE   | -1,17226 | 2,09E-05 |
| MAP3K1   | -1,17227 | 3,01E-08 |
| QDPR     | -1,17361 | 1,16E-07 |
| SKI      | -1,17514 | 5,08E-11 |
| EFNB2    | -1,1774  | 0,000221 |
| SLC2A1   | -1,1793  | 0,000588 |
| MYL6     | -1,17935 | 1,31E-14 |
| ARHGAP17 | -1,1797  | 6,45E-11 |
| B4GALT4  | -1,17971 | 2,63E-07 |
| TPD52L2  | -1,18039 | 1,63E-11 |
| AP1M1    | -1,18068 | 3,49E-05 |
| PHF13    | -1,18111 | 5,34E-07 |
| CHAF1B   | -1,18155 | 1,89E-06 |
| RANBP6   | -1,1819  | 0,000135 |
| LATS2    | -1,18347 | 2,64E-07 |
| TYW3     | -1,18465 | 1,74E-08 |
| LTBP3    | -1,18487 | 1,77E-08 |
| TAB3     | -1,18717 | 4,01E-05 |
| ROCK2    | -1,18762 | 1,69E-10 |
| ATP11B   | -1,18768 | 1,18E-09 |
| PGAM1    | -1,18817 | 8,34E-06 |
| TMED5    | -1,18853 | 2,98E-06 |
| CASP8    | -1,19039 | 3,73E-07 |
| CCDC109B | -1,19058 | 0,000109 |

|          |          |          |
|----------|----------|----------|
| NISCH    | -1,19092 | 1,03E-08 |
| ANO10    | -1,19129 | 0,000917 |
| ARHGEF26 | -1,19217 | 6,28E-06 |
| SLC15A4  | -1,19242 | 6,54E-07 |
| FAM198B  | -1,19287 | 5,06E-06 |
| NDFIP2   | -1,19408 | 5,71E-07 |
| IQGAP1   | -1,19422 | 2,03E-09 |
| ERLIN2   | -1,19692 | 1,27E-10 |
| HCCS     | -1,19705 | 6,97E-06 |
| PKI55    | -1,19706 | 0,000865 |
| POT1     | -1,19786 | 7,36E-07 |
| FAM73A   | -1,20016 | 0,000799 |
| CIT      | -1,20059 | 0,000353 |
| FEZ2     | -1,20071 | 1,93E-08 |
| SEPN1    | -1,20267 | 4,43E-11 |
| ZDHC5    | -1,20282 | 3,15E-12 |
| NUP43    | -1,2044  | 7,17E-06 |
| KIAA1671 | -1,20501 | 1,35E-08 |
| ABHD12   | -1,20546 | 5,07E-10 |
| RFT1     | -1,20835 | 4,45E-10 |
| PRKACB   | -1,20906 | 3,66E-06 |
| STRAP    | -1,20935 | 3,48E-09 |
| PSTPIP2  | -1,20991 | 3,73E-07 |
| CHEK1    | -1,21166 | 5,76E-11 |
| CAB39    | -1,21415 | 8,17E-11 |
| ZC3H7B   | -1,21417 | 9,04E-11 |
| MROH1    | -1,21579 | 1,62E-07 |
| PRKD3    | -1,21583 | 1,20E-08 |
| NNT      | -1,21592 | 1,30E-07 |
| RNPEPL1  | -1,21655 | 6,06E-06 |
| RFC5     | -1,21767 | 2,07E-07 |
| MIB2     | -1,2186  | 5,57E-05 |
| SLC35F2  | -1,21887 | 4,45E-05 |
| WDR82    | -1,22249 | 8,14E-12 |
| POLK     | -1,22292 | 1,38E-06 |
| MLEC     | -1,22315 | 7,59E-07 |
| NOL9     | -1,2235  | 1,12E-06 |
| KIF1B    | -1,224   | 1,47E-05 |
| PPP2CB   | -1,22452 | 9,28E-10 |
| MYO1B    | -1,22471 | 7,71E-14 |
| C11orf1  | -1,2249  | 0,000772 |
| RECQL    | -1,22506 | 5,84E-10 |
| BICD2    | -1,22594 | 8,66E-11 |
| NSMAF    | -1,22615 | 2,49E-09 |
| HMGA1    | -1,22659 | 2,77E-09 |
| DNAJC16  | -1,22718 | 3,25E-06 |
| GLT8D1   | -1,22788 | 2,17E-08 |
| PLSCR1   | -1,22945 | 4,05E-07 |
| USP4     | -1,23056 | 8,89E-10 |
| PRKDC    | -1,2312  | 4,68E-09 |

|          |          |          |
|----------|----------|----------|
| ANKRD13C | -1,23239 | 2,38E-06 |
| TMEM115  | -1,23295 | 0,000202 |
| CC2D1B   | -1,23303 | 5,18E-09 |
| PIP4K2B  | -1,23534 | 2,60E-10 |
| DIEXF    | -1,23586 | 0,000108 |
| ADARB1   | -1,23672 | 3,57E-07 |
| HPCAL1   | -1,23697 | 1,08E-09 |
| LTN1     | -1,23923 | 0,000102 |
| PRKCD    | -1,23938 | 0,000399 |
| CKAP2L   | -1,24236 | 0,000472 |
| CAST     | -1,24467 | 1,28E-09 |
| LMO7     | -1,247   | 6,84E-07 |
| CD63     | -1,24731 | 1,03E-05 |
| HSP90B1  | -1,24734 | 5,00E-11 |
| NUP98    | -1,24925 | 7,71E-15 |
| DAPK3    | -1,24961 | 1,08E-10 |
| RAD54L2  | -1,25089 | 4,85E-05 |
| PTPRF    | -1,25258 | 1,85E-15 |
| ZMYM6    | -1,25453 | 1,60E-05 |
| SMC5     | -1,25583 | 1,52E-09 |
| TTC28    | -1,25647 | 9,65E-05 |
| EMC1     | -1,258   | 1,31E-12 |
| KIF18A   | -1,2589  | 2,98E-06 |
| COL4A3BP | -1,25906 | 3,48E-08 |
| PPME1    | -1,26017 | 2,12E-07 |
| PGS1     | -1,26099 | 1,76E-05 |
| BRI3     | -1,26168 | 7,48E-11 |
| PHC1     | -1,26226 | 1,16E-07 |
| PQLC1    | -1,26229 | 1,56E-07 |
| LRRCC1   | -1,26255 | 1,42E-06 |
| AASDHPPT | -1,26263 | 1,40E-07 |
| HIAT1    | -1,26272 | 9,08E-10 |
| RHBDF2   | -1,26514 | 2,20E-09 |
| CSNK2A2  | -1,266   | 1,17E-11 |
| RPS6KA1  | -1,26616 | 6,22E-05 |
| HERPUD2  | -1,26641 | 2,47E-09 |
| TRPC4AP  | -1,26656 | 1,78E-08 |
| ABHD5    | -1,26835 | 2,14E-08 |
| DPP9     | -1,26871 | 6,46E-09 |
| TANGO6   | -1,26973 | 1,22E-05 |
| MLXIP    | -1,27125 | 2,16E-14 |
| AHNAK2   | -1,27151 | 6,57E-06 |
| SLX4     | -1,27364 | 8,10E-08 |
| RGS3     | -1,27376 | 9,78E-07 |
| DEAF1    | -1,27395 | 9,28E-08 |
| NRSN2    | -1,27396 | 5,70E-05 |
| CCT6A    | -1,28022 | 8,61E-15 |
| NSFL1C   | -1,28074 | 6,21E-11 |
| RBL1     | -1,28131 | 4,25E-05 |
| SF3A3    | -1,2819  | 9,26E-06 |

|           |          |          |
|-----------|----------|----------|
| CC2D2A    | -1,28221 | 8,38E-07 |
| CLIP1     | -1,28282 | 5,68E-13 |
| CERS5     | -1,28354 | 1,66E-09 |
| FMNL1     | -1,28357 | 7,16E-05 |
| FZD7      | -1,28379 | 3,57E-06 |
| CD81      | -1,284   | 4,57E-15 |
| UBA5      | -1,28558 | 1,25E-08 |
| PTPRA     | -1,28717 | 5,00E-07 |
| PPAP2C    | -1,28787 | 2,24E-09 |
| ZW10      | -1,28822 | 2,56E-09 |
| VAMP3     | -1,28855 | 0,00024  |
| PSMD13    | -1,28929 | 5,86E-15 |
| ARL16     | -1,28985 | 2,91E-06 |
| TLN2      | -1,29256 | 0,000376 |
| RTCA      | -1,29295 | 3,29E-09 |
| SSH2      | -1,29338 | 5,13E-06 |
| IPO5      | -1,29378 | 1,78E-16 |
| PEX14     | -1,2963  | 1,98E-07 |
| GTF2H1    | -1,29784 | 2,21E-11 |
| PPARA     | -1,2983  | 0,000322 |
| PSD3      | -1,29875 | 1,79E-08 |
| CEP290    | -1,2992  | 2,64E-08 |
| USP54     | -1,30213 | 4,36E-12 |
| ELF4      | -1,30396 | 1,38E-05 |
| M6PR      | -1,30631 | 2,15E-07 |
| RBM19     | -1,30641 | 7,23E-05 |
| CEP162    | -1,30674 | 5,28E-05 |
| OPN3      | -1,3092  | 3,12E-07 |
| CES2      | -1,30948 | 3,54E-09 |
| PLOD1     | -1,30972 | 7,54E-09 |
| ALS2      | -1,31021 | 1,40E-09 |
| TMEM50A   | -1,31091 | 3,79E-09 |
| MLLT3     | -1,31094 | 1,71E-06 |
| ARHGEF18  | -1,31095 | 5,83E-11 |
| METTTL21B | -1,31167 | 4,50E-07 |
| CHST14    | -1,31206 | 8,15E-06 |
| NRGN      | -1,31209 | 0,000301 |
| SLC41A2   | -1,31211 | 9,52E-05 |
| ARL13B    | -1,31238 | 8,54E-09 |
| NPTXR     | -1,31279 | 1,88E-09 |
| IFT80     | -1,3148  | 0,000222 |
| STAG3L2   | -1,31496 | 9,66E-05 |
| STRADB    | -1,31528 | 8,21E-10 |
| NUDT16    | -1,31657 | 4,28E-06 |
| CTDSPL    | -1,31797 | 8,07E-12 |
| BBC3      | -1,31823 | 1,75E-05 |
| TACC1     | -1,3183  | 3,47E-11 |
| TJP1      | -1,3183  | 1,67E-06 |
| VPS54     | -1,31901 | 1,01E-06 |
| BFAR      | -1,31999 | 1,65E-14 |

|          |          |          |
|----------|----------|----------|
| HDAC7    | -1,32112 | 5,96E-13 |
| PCSK7    | -1,32479 | 0,00029  |
| IPO7     | -1,32598 | 2,71E-14 |
| KIAA0930 | -1,32708 | 3,87E-06 |
| ANXA11   | -1,3277  | 3,16E-10 |
| CTBS     | -1,32998 | 3,20E-05 |
| TBC1D20  | -1,33081 | 4,20E-10 |
| SLC4A7   | -1,33098 | 1,12E-07 |
| NDUFAF3  | -1,33234 | 1,19E-11 |
| DFFA     | -1,33238 | 3,92E-13 |
| TTL      | -1,33299 | 1,57E-09 |
| CAP2     | -1,33526 | 1,39E-10 |
| SLC25A37 | -1,33632 | 5,87E-06 |
| BTN2A2   | -1,33974 | 2,45E-05 |
| RPS6KA4  | -1,34144 | 7,98E-12 |
| AMPD2    | -1,34206 | 4,44E-07 |
| CCBL1    | -1,34225 | 0,000664 |
| KRT80    | -1,34238 | 2,83E-07 |
| EPS15    | -1,34249 | 2,34E-10 |
| STAT3    | -1,34379 | 0,000173 |
| QSER1    | -1,3442  | 2,58E-14 |
| PANK2    | -1,3445  | 1,32E-08 |
| CNST     | -1,34586 | 0,000194 |
| CHID1    | -1,34648 | 9,21E-09 |
| NBAS     | -1,34672 | 9,31E-11 |
| MAPKBP1  | -1,34869 | 0,000606 |
| HEATR1   | -1,3499  | 1,19E-10 |
| PHYH     | -1,35011 | 2,78E-05 |
| DONSON   | -1,35026 | 2,59E-07 |
| PTPN13   | -1,35082 | 9,13E-08 |
| ZNF512   | -1,35229 | 1,43E-07 |
| C2orf74  | -1,35234 | 0,000302 |
| SACM1L   | -1,35345 | 1,54E-09 |
| RNF213   | -1,35463 | 6,21E-05 |
| ABCB7    | -1,35563 | 2,38E-06 |
| PFAS     | -1,35766 | 1,59E-16 |
| LIN7C    | -1,35775 | 5,38E-06 |
| PAQR7    | -1,35848 | 1,48E-06 |
| TMEM248  | -1,3593  | 2,39E-12 |
| PRCP     | -1,36169 | 2,16E-09 |
| ARFGEF3  | -1,36322 | 3,71E-05 |
| GLYR1    | -1,36335 | 1,81E-15 |
| BAZ2A    | -1,36373 | 1,24E-16 |
| FCHSD2   | -1,36381 | 6,00E-06 |
| BCKDHB   | -1,36623 | 0,000149 |
| TUBB6    | -1,36672 | 1,87E-09 |
| WBP11    | -1,36686 | 5,07E-16 |
| TBCE     | -1,36742 | 1,71E-08 |
| SRI      | -1,36812 | 4,96E-14 |
| PGM3     | -1,36831 | 1,34E-06 |

|          |          |          |
|----------|----------|----------|
| PIP4K2A  | -1,37116 | 2,98E-14 |
| TBL1XR1  | -1,37137 | 7,73E-09 |
| DUSP3    | -1,37217 | 6,85E-12 |
| FLYWCH1  | -1,37279 | 1,16E-05 |
| FAM214B  | -1,37341 | 2,99E-05 |
| SNTB2    | -1,3747  | 4,88E-08 |
| ICMT     | -1,37509 | 3,92E-17 |
| NGLY1    | -1,37557 | 8,37E-09 |
| PPP1R18  | -1,37613 | 3,37E-09 |
| DCLK1    | -1,3767  | 1,25E-10 |
| COLGALT1 | -1,37792 | 1,31E-15 |
| MYCBP2   | -1,37934 | 8,91E-11 |
| BAG2     | -1,37995 | 5,47E-09 |
| HSPB11   | -1,38037 | 1,08E-05 |
| PARP8    | -1,38077 | 1,93E-05 |
| SLC16A1  | -1,38151 | 7,65E-12 |
| PIK3C3   | -1,38329 | 3,32E-07 |
| ABCC1    | -1,38345 | 1,14E-14 |
| WDR35    | -1,38392 | 1,93E-06 |
| TBRG1    | -1,38696 | 1,01E-11 |
| PLXNB2   | -1,38769 | 1,45E-06 |
| CD99L2   | -1,38829 | 1,15E-06 |
| CDV3     | -1,38876 | 1,95E-09 |
| PLS1     | -1,38935 | 7,44E-08 |
| GALNT14  | -1,38952 | 1,99E-10 |
| NACC2    | -1,3904  | 2,05E-10 |
| CYSTM1   | -1,39042 | 9,21E-11 |
| FUT11    | -1,39098 | 0,000292 |
| EFCAB14  | -1,39131 | 4,81E-15 |
| CNDP2    | -1,39148 | 6,41E-13 |
| GIT2     | -1,39633 | 2,78E-14 |
| ABCD3    | -1,39803 | 3,40E-11 |
| BAP1     | -1,39817 | 2,98E-14 |
| ACTR8    | -1,39829 | 5,89E-11 |
| PPP2R5B  | -1,39923 | 1,00E-04 |
| METTL15  | -1,39948 | 2,11E-08 |
| GPX8     | -1,40071 | 1,40E-08 |
| ACER3    | -1,40159 | 2,36E-11 |
| TJP2     | -1,40283 | 2,61E-05 |
| RASAL2   | -1,40293 | 4,59E-09 |
| KLHL15   | -1,40393 | 0,000471 |
| DPYSL2   | -1,40413 | 1,00E-05 |
| CTSO     | -1,40474 | 0,000774 |
| ANKH     | -1,40485 | 1,23E-07 |
| NCS1     | -1,40712 | 6,88E-16 |
| ZNF445   | -1,40725 | 6,75E-06 |
| FNDC3A   | -1,40875 | 1,64E-12 |
| DIXDC1   | -1,40895 | 3,43E-05 |
| HMHA1    | -1,41218 | 3,31E-07 |
| SUSD6    | -1,41301 | 5,57E-06 |

|           |          |          |
|-----------|----------|----------|
| ANKLE2    | -1,41636 | 1,02E-11 |
| MLLT4     | -1,41748 | 1,63E-07 |
| NPAS2     | -1,41866 | 0,000122 |
| PTAR1     | -1,4187  | 3,03E-09 |
| ERO1A     | -1,41884 | 1,65E-12 |
| MARVELD1  | -1,41949 | 2,48E-11 |
| LONP2     | -1,41978 | 6,14E-13 |
| PLS3      | -1,41991 | 1,22E-11 |
| PDGFA     | -1,42016 | 4,46E-09 |
| AIDA      | -1,42151 | 5,40E-07 |
| GANC      | -1,42178 | 0,000298 |
| ANXA6     | -1,42227 | 5,78E-05 |
| CREBL2    | -1,42335 | 1,43E-05 |
| ARFGAP1   | -1,42376 | 4,24E-15 |
| FKBP11    | -1,42385 | 1,33E-07 |
| C20orf194 | -1,42687 | 7,52E-05 |
| PPP2R3A   | -1,42711 | 1,27E-06 |
| RAB9A     | -1,42823 | 1,32E-08 |
| SPIN4     | -1,42857 | 0,000529 |
| PLXND1    | -1,42882 | 5,35E-06 |
| TP53BP2   | -1,43088 | 1,08E-08 |
| EIF4A2    | -1,43373 | 5,11E-05 |
| ENTPD7    | -1,43418 | 3,19E-06 |
| DDX17     | -1,43472 | 2,65E-19 |
| VEGFB     | -1,435   | 1,40E-06 |
| CDC42EP2  | -1,43585 | 1,25E-07 |
| KIAA1147  | -1,43709 | 8,06E-09 |
| EFNA5     | -1,4371  | 6,00E-08 |
| GNL3      | -1,4377  | 3,26E-07 |
| RHPN2     | -1,43829 | 1,06E-10 |
| RHOA      | -1,44009 | 9,45E-17 |
| UAP1L1    | -1,44271 | 4,58E-08 |
| AJUBA     | -1,44398 | 0,000951 |
| ORAI2     | -1,44505 | 6,46E-08 |
| TNFRSF1A  | -1,44519 | 1,05E-08 |
| IGF2R     | -1,44575 | 8,72E-10 |
| CHCHD7    | -1,44594 | 1,31E-05 |
| CPNE7     | -1,44791 | 4,48E-09 |
| CDC42BPA  | -1,44826 | 1,90E-07 |
| COPB1     | -1,44832 | 4,18E-17 |
| FKBP1A    | -1,44901 | 5,34E-11 |
| PTPN21    | -1,44911 | 1,73E-07 |
| ARHGAP1   | -1,44987 | 7,59E-08 |
| PCBP4     | -1,44992 | 7,04E-10 |
| MECOM     | -1,45078 | 6,25E-10 |
| NUDT21    | -1,45287 | 9,39E-16 |
| CNEP1R1   | -1,45409 | 1,43E-05 |
| SEPT2     | -1,45546 | 1,78E-16 |
| CXorf38   | -1,45547 | 1,23E-07 |
| CAMKK1    | -1,45664 | 7,50E-05 |

|           |          |          |
|-----------|----------|----------|
| RABL3     | -1,45681 | 2,23E-09 |
| LPCAT3    | -1,457   | 1,32E-07 |
| UHRF1     | -1,45856 | 9,15E-08 |
| APPL1     | -1,45872 | 1,35E-16 |
| IP6K1     | -1,45885 | 3,02E-15 |
| HMGCL     | -1,46079 | 2,15E-09 |
| GHDC      | -1,46104 | 2,11E-05 |
| SACS      | -1,46186 | 2,74E-15 |
| SGTB      | -1,46652 | 6,93E-05 |
| TPP2      | -1,46753 | 2,72E-12 |
| CRY1      | -1,46846 | 6,05E-11 |
| SDC3      | -1,47002 | 3,63E-09 |
| TTC33     | -1,47059 | 8,80E-05 |
| NRBP2     | -1,47235 | 2,52E-06 |
| YEATS2    | -1,47299 | 0,00017  |
| P4HA2     | -1,47313 | 3,93E-06 |
| BACE1     | -1,47583 | 8,22E-08 |
| DGKD      | -1,47633 | 2,59E-09 |
| TUBA1C    | -1,4783  | 1,24E-17 |
| SH3D19    | -1,47952 | 2,19E-13 |
| DESI1     | -1,48044 | 4,35E-16 |
| ZC3H12A   | -1,48109 | 0,000103 |
| RHOBTB2   | -1,48154 | 2,86E-06 |
| DNAJC3    | -1,48566 | 2,71E-06 |
| RAB11FIP1 | -1,48598 | 5,12E-15 |
| PSMA1     | -1,486   | 8,21E-17 |
| ITFG1     | -1,48647 | 1,95E-07 |
| PDLIM5    | -1,48656 | 1,65E-07 |
| MRE11A    | -1,48761 | 1,32E-12 |
| CBL       | -1,48787 | 8,84E-12 |
| ZNF395    | -1,48825 | 9,49E-15 |
| KATNB1    | -1,48848 | 1,41E-10 |
| FAM111A   | -1,48992 | 1,41E-11 |
| TERF1     | -1,49036 | 7,71E-11 |
| DDX10     | -1,49179 | 1,78E-16 |
| NFIX      | -1,49225 | 2,69E-05 |
| GBAS      | -1,49339 | 0,00042  |
| PTPN11    | -1,49719 | 3,07E-20 |
| NEK7      | -1,49812 | 7,30E-11 |
| WEE1      | -1,49908 | 5,61E-05 |
| PLEKHM1   | -1,50315 | 5,49E-06 |
| ARMC9     | -1,50433 | 4,87E-10 |
| FAM43A    | -1,50942 | 8,88E-08 |
| RRM2B     | -1,51271 | 4,66E-05 |
| KIAA1143  | -1,51386 | 1,10E-08 |
| TIAM2     | -1,51456 | 0,000578 |
| ZFP36L1   | -1,52036 | 1,45E-09 |
| LOC645166 | -1,52373 | 0,000347 |
| AP2A2     | -1,52382 | 8,16E-15 |
| PIK3R1    | -1,52492 | 7,71E-11 |



|          |          |          |
|----------|----------|----------|
| MYO9B    | -1,52548 | 1,16E-07 |
| SEC22C   | -1,52548 | 3,55E-12 |
| LUZP1    | -1,52695 | 1,17E-05 |
| LCOR     | -1,52771 | 5,09E-13 |
| TRIO     | -1,52889 | 1,67E-13 |
| SLC36A4  | -1,53035 | 7,18E-05 |
| PDE12    | -1,5322  | 2,31E-15 |
| MYOF     | -1,53272 | 8,35E-05 |
| C11orf54 | -1,53278 | 0,000111 |
| GALE     | -1,53308 | 4,84E-06 |
| KLHL7    | -1,53536 | 8,62E-08 |
| ATP13A3  | -1,5372  | 3,60E-21 |
| UROD     | -1,53728 | 2,95E-11 |
| TBC1D25  | -1,53832 | 0,000153 |
| COL5A2   | -1,53855 | 9,88E-05 |
| FAM109A  | -1,54175 | 2,06E-08 |
| DBNL     | -1,54252 | 2,19E-07 |
| CRYZL1   | -1,54303 | 1,92E-06 |
| XPNPEP1  | -1,5435  | 2,20E-10 |
| TRPM2    | -1,54427 | 6,12E-08 |
| SNX8     | -1,5449  | 1,67E-09 |
| MAP4     | -1,54539 | 2,37E-23 |
| MOCS1    | -1,54634 | 0,000143 |
| TMEM263  | -1,54671 | 1,71E-10 |
| PRMT3    | -1,54685 | 3,49E-09 |
| NETO2    | -1,54873 | 3,80E-20 |
| ANKRD18B | -1,5489  | 2,44E-06 |
| PNPLA2   | -1,5504  | 2,55E-08 |
| LPCAT1   | -1,5518  | 5,49E-14 |
| LARS2    | -1,55383 | 8,11E-14 |
| SLFN5    | -1,55485 | 1,52E-08 |
| SH3BGR13 | -1,55501 | 3,93E-05 |
| PI4K2A   | -1,55657 | 1,14E-09 |
| GNMB     | -1,55711 | 1,68E-07 |
| ATM      | -1,55785 | 6,27E-12 |
| C4orf32  | -1,55801 | 6,88E-05 |
| DDX47    | -1,55833 | 1,17E-18 |
| RSPRY1   | -1,55923 | 1,44E-16 |
| RAB29    | -1,56106 | 2,41E-08 |
| SHPRH    | -1,56112 | 1,01E-06 |
| MCTP1    | -1,56165 | 8,55E-09 |
| CYB5R3   | -1,56208 | 1,01E-09 |
| SOD2     | -1,56328 | 8,78E-15 |
| TFB1M    | -1,5641  | 2,68E-05 |
| PHKB     | -1,56416 | 7,35E-06 |
| GIN54    | -1,56433 | 9,64E-15 |
| CD83     | -1,56466 | 5,82E-05 |
| XRN1     | -1,5673  | 4,52E-06 |
| SEMA4B   | -1,56878 | 8,39E-14 |
| ARFGEF1  | -1,57137 | 3,56E-14 |

|           |          |          |
|-----------|----------|----------|
| APH1B     | -1,57206 | 0,000167 |
| ACTN1     | -1,57233 | 2,10E-10 |
| ATRNL1    | -1,57365 | 0,000855 |
| GIN53     | -1,57424 | 7,38E-06 |
| EHBP1L1   | -1,57904 | 6,43E-05 |
| API5      | -1,58011 | 1,01E-16 |
| MOK       | -1,58053 | 1,04E-07 |
| PAQR3     | -1,58315 | 3,50E-09 |
| HGSNAT    | -1,58496 | 6,40E-06 |
| TMEM30A   | -1,58563 | 3,76E-07 |
| AP2B1     | -1,58591 | 2,31E-18 |
| NUAK1     | -1,58728 | 7,92E-12 |
| NPAT      | -1,58841 | 3,92E-10 |
| UAP1      | -1,58876 | 6,26E-09 |
| FAM118B   | -1,58981 | 3,26E-09 |
| KLHL18    | -1,59128 | 1,27E-11 |
| PACSIN2   | -1,59543 | 9,52E-14 |
| GNA12     | -1,59563 | 2,46E-18 |
| RCBTB1    | -1,59577 | 1,99E-10 |
| TNFRSF12A | -1,59641 | 0,000166 |
| FAR1      | -1,59716 | 2,09E-15 |
| IER3      | -1,59826 | 4,92E-13 |
| SNX21     | -1,59903 | 3,82E-08 |
| GBE1      | -1,60104 | 5,85E-09 |
| BHLHE40   | -1,60142 | 2,07E-13 |
| NEIL2     | -1,60354 | 1,17E-11 |
| PLCXD1    | -1,60604 | 5,48E-05 |
| FNTA      | -1,60627 | 1,39E-14 |
| DOK4      | -1,60675 | 9,86E-15 |
| HEXB      | -1,60679 | 3,90E-13 |
| TRAM2     | -1,60756 | 5,70E-20 |
| HIGD1A    | -1,60774 | 2,88E-13 |
| EIF2AK4   | -1,60822 | 3,78E-17 |
| LFNG      | -1,61161 | 1,64E-07 |
| ABHD10    | -1,61282 | 1,29E-10 |
| MBNL2     | -1,61302 | 6,16E-13 |
| SMARCD3   | -1,61303 | 4,44E-07 |
| HIF1A     | -1,61535 | 2,37E-20 |
| PIK3C2A   | -1,61587 | 9,63E-23 |
| SLC2A8    | -1,6178  | 1,26E-07 |
| POMZP3    | -1,61861 | 1,77E-08 |
| CPPED1    | -1,62    | 1,36E-14 |
| FHL3      | -1,62069 | 2,71E-11 |
| OXCT1     | -1,6232  | 6,94E-13 |
| MAP4K2    | -1,6252  | 8,97E-09 |
| NOTCH2    | -1,62553 | 2,01E-21 |
| DTL       | -1,63106 | 7,85E-19 |
| ALKBH8    | -1,63143 | 1,41E-05 |
| FOXP1     | -1,63382 | 2,62E-16 |
| PLEKHA1   | -1,63484 | 1,07E-10 |

|           |          |          |
|-----------|----------|----------|
| LMNB2     | -1,63608 | 1,86E-08 |
| USP28     | -1,63623 | 2,82E-12 |
| MSANTD3   | -1,6366  | 4,74E-10 |
| OAT       | -1,63709 | 7,27E-05 |
| SORL1     | -1,63742 | 7,82E-10 |
| MIER1     | -1,6378  | 4,41E-16 |
| ITSN1     | -1,6381  | 4,38E-15 |
| FGGY      | -1,63916 | 0,000127 |
| CAPN10    | -1,64075 | 6,56E-06 |
| MAP2      | -1,64123 | 1,14E-05 |
| ALAS1     | -1,64165 | 1,29E-10 |
| STK4      | -1,64208 | 5,51E-19 |
| RTN4      | -1,64212 | 2,43E-17 |
| IL13RA1   | -1,64416 | 4,06E-10 |
| STXBP5    | -1,64615 | 8,54E-11 |
| PXN       | -1,64963 | 6,94E-10 |
| SOCS6     | -1,64987 | 1,79E-11 |
| SEC23A    | -1,65093 | 2,62E-13 |
| FURIN     | -1,65274 | 6,82E-17 |
| ZDHHC14   | -1,65326 | 7,93E-06 |
| NTN4      | -1,65439 | 0,00062  |
| NFKB2     | -1,65442 | 9,85E-12 |
| SEPT7     | -1,65458 | 4,13E-21 |
| RBCK1     | -1,65605 | 3,05E-24 |
| CAP1      | -1,65654 | 8,17E-14 |
| TYMS      | -1,65772 | 4,15E-21 |
| VKORC1L1  | -1,65772 | 2,26E-22 |
| ZDBF2     | -1,65815 | 0,000411 |
| SNX19     | -1,65854 | 9,30E-20 |
| ARHGEF12  | -1,65943 | 6,12E-16 |
| TNS1      | -1,66159 | 1,91E-05 |
| FAM216A   | -1,66204 | 1,99E-07 |
| KANK1     | -1,6652  | 3,47E-10 |
| TRAK1     | -1,6654  | 1,82E-14 |
| EDEM2     | -1,66995 | 1,37E-15 |
| PTDSS2    | -1,67427 | 6,19E-06 |
| SCMH1     | -1,67492 | 0,000906 |
| FGF11     | -1,67651 | 4,42E-05 |
| KLHL2     | -1,6766  | 5,24E-08 |
| LPIN2     | -1,67668 | 3,33E-10 |
| SDCCAG8   | -1,67822 | 7,37E-09 |
| LGALS3    | -1,684   | 6,46E-05 |
| B2M       | -1,68413 | 2,65E-07 |
| LASP1     | -1,68704 | 4,14E-10 |
| LZTFL1    | -1,68719 | 3,63E-09 |
| FOXK1     | -1,68881 | 2,86E-16 |
| FIGNL1    | -1,6894  | 5,56E-16 |
| RPGRIP1L  | -1,69126 | 4,76E-11 |
| LINC01116 | -1,69206 | 1,92E-07 |
| PCNA      | -1,69255 | 4,56E-26 |

|           |          |          |
|-----------|----------|----------|
| ARIH2     | -1,69336 | 7,30E-21 |
| STXBP1    | -1,69417 | 3,94E-13 |
| LIMK1     | -1,69575 | 3,57E-10 |
| CEP250    | -1,697   | 1,82E-09 |
| ACSS1     | -1,69738 | 1,99E-05 |
| PVR       | -1,69759 | 7,75E-06 |
| SIPA1L3   | -1,69774 | 2,94E-22 |
| EHD1      | -1,69796 | 4,01E-07 |
| SGCB      | -1,69878 | 6,59E-14 |
| LOC100125 | -1,70025 | 2,57E-09 |
| ANXA2     | -1,70096 | 3,89E-28 |
| MPP6      | -1,70236 | 5,24E-15 |
| SEC24D    | -1,70371 | 0,000183 |
| MYH10     | -1,70448 | 2,31E-20 |
| TOMM34    | -1,71079 | 2,26E-21 |
| FAM160A1  | -1,71122 | 5,65E-06 |
| TCF12     | -1,71295 | 1,97E-09 |
| ARF4      | -1,71425 | 3,03E-07 |
| MMD       | -1,71497 | 0,000335 |
| CDC14B    | -1,71534 | 1,89E-09 |
| SNX29     | -1,71637 | 3,15E-06 |
| OSBPL5    | -1,71667 | 1,08E-10 |
| FLNA      | -1,7176  | 2,48E-21 |
| HACE1     | -1,7178  | 6,14E-06 |
| CPD       | -1,71946 | 7,92E-20 |
| CTR9      | -1,72013 | 2,26E-10 |
| HPS5      | -1,72023 | 3,80E-14 |
| FHOD1     | -1,72206 | 4,90E-20 |
| TTYH3     | -1,72429 | 1,36E-16 |
| SPTBN1    | -1,72458 | 6,57E-29 |
| SYNJ1     | -1,72565 | 1,01E-06 |
| ARSK      | -1,72727 | 4,30E-05 |
| SNORA40   | -1,72998 | 3,26E-05 |
| PTPN1     | -1,73087 | 1,17E-16 |
| ARHGEF28  | -1,73141 | 1,13E-14 |
| DSG2      | -1,73198 | 1,48E-25 |
| ENTPD4    | -1,73379 | 3,38E-16 |
| MCM8      | -1,73511 | 5,15E-17 |
| SDC1      | -1,73854 | 6,53E-17 |
| PYGB      | -1,73875 | 1,46E-27 |
| DNAJC18   | -1,7396  | 8,03E-05 |
| TRIM68    | -1,74071 | 4,35E-05 |
| NT5DC3    | -1,74157 | 1,78E-08 |
| TMEM106f  | -1,74317 | 1,29E-17 |
| SLC45A3   | -1,74323 | 3,85E-08 |
| COL6A1    | -1,74347 | 2,76E-17 |
| ATAD5     | -1,74368 | 4,73E-07 |
| EXTL2     | -1,74384 | 1,76E-06 |
| KCTD7     | -1,7439  | 1,28E-05 |
| ABR       | -1,74575 | 6,41E-19 |

|          |          |          |
|----------|----------|----------|
| NABP1    | -1,74593 | 1,08E-10 |
| DYNC2H1  | -1,7512  | 2,72E-11 |
| ZNFX1    | -1,75127 | 8,31E-10 |
| EFEMP1   | -1,75219 | 2,75E-20 |
| RELT     | -1,75278 | 7,85E-09 |
| C4orf19  | -1,75488 | 7,74E-05 |
| DNAJC13  | -1,75515 | 5,09E-13 |
| CNNM1    | -1,75716 | 2,47E-06 |
| C1orf106 | -1,75886 | 6,08E-05 |
| FERMT2   | -1,75909 | 1,85E-17 |
| ERC1     | -1,75975 | 3,72E-23 |
| NEDD4    | -1,76047 | 5,93E-20 |
| CDS2     | -1,76406 | 2,94E-16 |
| SERAC1   | -1,76492 | 1,75E-06 |
| ZNF827   | -1,76762 | 2,78E-05 |
| MICALL1  | -1,76834 | 3,19E-19 |
| SPG20    | -1,76982 | 3,72E-19 |
| MTMR2    | -1,77048 | 1,17E-22 |
| ASPHD1   | -1,7718  | 8,32E-07 |
| FZD6     | -1,77381 | 3,44E-14 |
| WNT5A    | -1,77655 | 4,55E-08 |
| ZC2HC1A  | -1,7767  | 7,66E-05 |
| HOXC6    | -1,7772  | 0,000486 |
| AP1S2    | -1,77876 | 5,69E-11 |
| CLSTN1   | -1,77929 | 8,21E-18 |
| UBTD1    | -1,78224 | 9,07E-05 |
| SRGAP1   | -1,78246 | 3,02E-08 |
| SPAG1    | -1,78444 | 6,13E-05 |
| TRIM44   | -1,78576 | 7,10E-28 |
| CDCA7    | -1,78845 | 3,76E-05 |
| PPP1R15A | -1,7886  | 8,51E-10 |
| SLC39A8  | -1,78967 | 1,04E-08 |
| SNX25    | -1,79254 | 1,16E-08 |
| SLC39A14 | -1,79578 | 5,64E-06 |
| MANEA    | -1,79938 | 2,04E-07 |
| PLD1     | -1,80064 | 6,38E-10 |
| THSD4    | -1,80191 | 6,20E-09 |
| FYN      | -1,80212 | 4,48E-05 |
| TBC1D1   | -1,804   | 3,55E-16 |
| SLC4A3   | -1,80529 | 5,70E-07 |
| NCAPD3   | -1,80721 | 5,09E-15 |
| DLX1     | -1,80879 | 2,49E-08 |
| TMEM120F | -1,8088  | 4,65E-16 |
| ILK      | -1,80975 | 1,03E-14 |
| FAF1     | -1,81173 | 2,52E-07 |
| RBFOX2   | -1,81221 | 5,71E-25 |
| RBM7     | -1,81235 | 1,24E-09 |
| AEBP2    | -1,81411 | 1,53E-13 |
| LITAF    | -1,81437 | 1,08E-10 |
| IFNAR2   | -1,81572 | 1,04E-10 |

|           |          |          |
|-----------|----------|----------|
| TIAM1     | -1,81634 | 2,43E-07 |
| LAMB2     | -1,81743 | 9,97E-19 |
| CRYZ      | -1,81807 | 1,96E-08 |
| CAPRIN2   | -1,8185  | 1,40E-09 |
| RCN1      | -1,81955 | 1,18E-26 |
| ITPR1     | -1,82097 | 5,60E-09 |
| POLQ      | -1,82112 | 8,07E-09 |
| STIM1     | -1,82152 | 1,18E-22 |
| TMCO3     | -1,82227 | 8,69E-10 |
| CCNYL1    | -1,82499 | 5,04E-09 |
| GNAI2     | -1,82629 | 3,04E-10 |
| CAMK1     | -1,82717 | 1,57E-05 |
| CDKN2B    | -1,82794 | 1,18E-06 |
| CARNMT1   | -1,82939 | 1,17E-10 |
| CKAP4     | -1,83064 | 3,31E-30 |
| RELL1     | -1,83164 | 4,75E-08 |
| ARL2BP    | -1,83241 | 3,66E-20 |
| DNAJB5    | -1,83244 | 0,000851 |
| STAT6     | -1,83257 | 1,25E-16 |
| VSIG10    | -1,83342 | 5,93E-18 |
| TSPAN14   | -1,8361  | 2,36E-18 |
| LRRK2     | -1,83948 | 0,000421 |
| LINC00641 | -1,84032 | 2,15E-06 |
| DIAPH3    | -1,84037 | 7,90E-07 |
| MCFD2     | -1,84133 | 5,72E-27 |
| ANXA2P2   | -1,8416  | 6,40E-05 |
| B3GLCT    | -1,84184 | 2,64E-08 |
| CD151     | -1,84193 | 3,65E-29 |
| C1GALT1   | -1,84198 | 1,23E-17 |
| ENC1      | -1,84233 | 5,88E-11 |
| TRMT11    | -1,84375 | 0,000604 |
| LOC103611 | -1,8473  | 0,000913 |
| SSH1      | -1,84842 | 1,28E-19 |
| PFKFB3    | -1,8512  | 4,23E-07 |
| DLX2      | -1,85142 | 9,91E-08 |
| HFE       | -1,85144 | 0,000668 |
| PIGK      | -1,85199 | 2,21E-13 |
| BTBD10    | -1,85222 | 5,04E-18 |
| SSR3      | -1,85236 | 2,78E-20 |
| RASA2     | -1,85344 | 1,27E-07 |
| PATL1     | -1,85358 | 1,82E-25 |
| PEX6      | -1,85531 | 0,000404 |
| NFAT5     | -1,85647 | 3,34E-09 |
| MORC4     | -1,85853 | 7,63E-20 |
| CLN5      | -1,86054 | 1,14E-05 |
| KLF3      | -1,86063 | 6,54E-12 |
| CHORDC1   | -1,8688  | 9,21E-21 |
| ZHX3      | -1,87037 | 1,77E-06 |
| LRRC8E    | -1,87105 | 1,59E-11 |
| PHC2      | -1,8729  | 3,00E-14 |

|           |          |          |
|-----------|----------|----------|
| PMEPA1    | -1,87451 | 3,50E-16 |
| EXT2      | -1,87577 | 7,35E-12 |
| C16orf70  | -1,87601 | 1,81E-11 |
| PSMD2     | -1,87728 | 2,06E-21 |
| EEA1      | -1,8777  | 2,29E-18 |
| TLN1      | -1,87826 | 2,74E-22 |
| LRRFIP1   | -1,87837 | 1,85E-30 |
| E2F7      | -1,88328 | 4,90E-12 |
| C12orf4   | -1,88527 | 6,33E-14 |
| SLC39A10  | -1,88767 | 5,22E-18 |
| TXLNA     | -1,88855 | 2,82E-17 |
| HCFC2     | -1,88945 | 3,91E-06 |
| CBFB      | -1,89311 | 2,01E-26 |
| FAM86DP   | -1,89436 | 1,84E-11 |
| INPP5B    | -1,89454 | 1,52E-10 |
| ANLN      | -1,89739 | 1,81E-32 |
| PLEKHA5   | -1,89826 | 7,52E-18 |
| ADGRE5    | -1,89881 | 4,16E-07 |
| ITM2B     | -1,90102 | 1,32E-20 |
| SLC25A22  | -1,90207 | 7,99E-19 |
| DDAH1     | -1,90304 | 1,92E-07 |
| ZNF185    | -1,90576 | 1,41E-09 |
| AGTPBP1   | -1,90597 | 8,44E-18 |
| CPS1      | -1,90725 | 1,02E-11 |
| MAML2     | -1,90769 | 4,33E-05 |
| QSOX1     | -1,90881 | 6,10E-32 |
| TWISTNB   | -1,91065 | 7,07E-18 |
| SGK1      | -1,91127 | 1,98E-06 |
| CALU      | -1,91189 | 3,65E-24 |
| MICAL1    | -1,91377 | 5,74E-06 |
| DDX58     | -1,91561 | 0,000765 |
| LINC01123 | -1,91577 | 3,17E-09 |
| SNAP25    | -1,91618 | 2,78E-05 |
| CASP3     | -1,91829 | 4,46E-10 |
| BMP1      | -1,91848 | 1,07E-15 |
| SUCLG2    | -1,91974 | 1,86E-21 |
| FAHD2B    | -1,92017 | 0,000652 |
| RNF141    | -1,92093 | 2,15E-14 |
| KLF6      | -1,92163 | 9,21E-05 |
| DIAPH2    | -1,92212 | 2,27E-12 |
| PON2      | -1,92233 | 1,84E-09 |
| TOLLIP    | -1,92235 | 2,15E-08 |
| TMEM123   | -1,92373 | 1,03E-33 |
| DNAJC24   | -1,92386 | 7,11E-10 |
| EXTL3     | -1,92633 | 6,15E-25 |
| RAB8B     | -1,9276  | 1,46E-07 |
| LDHA      | -1,92885 | 8,18E-32 |
| ACACA     | -1,92889 | 8,95E-33 |
| ME2       | -1,93088 | 1,86E-21 |
| FAM129B   | -1,93094 | 2,04E-22 |

|          |          |          |
|----------|----------|----------|
| ZNF319   | -1,93204 | 0,000222 |
| LMF2     | -1,93226 | 1,40E-15 |
| SCARF2   | -1,93339 | 1,49E-05 |
| HTR7P1   | -1,93469 | 0,000846 |
| UBA3     | -1,93507 | 5,08E-21 |
| ZAK      | -1,93662 | 8,96E-26 |
| BACH1    | -1,93794 | 4,02E-13 |
| NMT2     | -1,93799 | 1,91E-13 |
| STX2     | -1,94351 | 1,02E-15 |
| PTPRK    | -1,94397 | 4,71E-24 |
| TAF9B    | -1,94565 | 3,10E-09 |
| SLC16A4  | -1,94569 | 4,21E-05 |
| MYO10    | -1,94732 | 4,69E-23 |
| LAMB1    | -1,94783 | 1,21E-34 |
| ZNF275   | -1,95083 | 1,72E-20 |
| TNIP1    | -1,95281 | 6,26E-09 |
| RNF170   | -1,95398 | 4,34E-09 |
| TMEM135  | -1,95577 | 2,05E-11 |
| CEP170   | -1,95779 | 1,15E-25 |
| BEND6    | -1,95894 | 0,000627 |
| DOCK9    | -1,96415 | 8,45E-17 |
| NFKB1    | -1,96597 | 3,03E-10 |
| WDR91    | -1,97026 | 8,62E-18 |
| PDDC1    | -1,9732  | 8,68E-17 |
| ZNF853   | -1,97474 | 0,000429 |
| ARFGAP3  | -1,97539 | 7,99E-15 |
| FGFR1    | -1,9779  | 2,50E-25 |
| SNX10    | -1,97976 | 4,02E-08 |
| EFR3A    | -1,98012 | 6,13E-10 |
| POFUT2   | -1,98141 | 2,79E-11 |
| SLC17A5  | -1,98377 | 2,22E-07 |
| GPR180   | -1,9842  | 1,69E-16 |
| LPP      | -1,98614 | 7,04E-20 |
| PXDC1    | -1,98826 | 3,73E-12 |
| NAB1     | -1,99036 | 1,42E-11 |
| CREB3L2  | -1,99135 | 7,59E-15 |
| C11orf68 | -1,99315 | 6,76E-21 |
| WSB2     | -1,99408 | 1,63E-06 |
| CARS2    | -1,99943 | 9,53E-24 |
| SPSB1    | -2,00183 | 8,59E-05 |
| EFNB1    | -2,00547 | 4,70E-13 |
| STX1A    | -2,00592 | 2,33E-15 |
| NR2F2    | -2,00819 | 1,77E-21 |
| ARAP1    | -2,00877 | 2,56E-31 |
| ASCC3    | -2,00966 | 6,45E-11 |
| ECHDC1   | -2,00974 | 3,69E-13 |
| SLC12A8  | -2,01276 | 6,49E-12 |
| CDK17    | -2,01292 | 1,14E-18 |
| ACAT1    | -2,01359 | 9,33E-12 |
| TEAD1    | -2,01676 | 8,62E-34 |



|           |          |          |
|-----------|----------|----------|
| SOAT1     | -2,02124 | 5,45E-20 |
| SLC2A10   | -2,02477 | 1,05E-10 |
| KCNQ5     | -2,0267  | 0,000747 |
| ASAP1     | -2,02754 | 1,23E-33 |
| BMP2K     | -2,02758 | 1,73E-20 |
| BBX       | -2,02819 | 8,22E-20 |
| KSR1      | -2,02911 | 1,10E-05 |
| APP       | -2,03004 | 4,39E-39 |
| VPS37B    | -2,0319  | 1,51E-25 |
| EVI5      | -2,0344  | 3,59E-10 |
| TNFRSF10B | -2,03735 | 6,91E-24 |
| ABCB10    | -2,04421 | 2,25E-15 |
| LPIN1     | -2,04668 | 6,31E-07 |
| MFSD1     | -2,04814 | 1,21E-11 |
| FKBP7     | -2,04894 | 3,09E-07 |
| MACF1     | -2,04947 | 3,60E-34 |
| MAPK8IP3  | -2,04987 | 0,000137 |
| UBE2H     | -2,05129 | 2,76E-10 |
| NUPL2     | -2,05251 | 4,77E-05 |
| TAP2      | -2,05327 | 2,83E-14 |
| EZR       | -2,05408 | 1,59E-17 |
| FTO       | -2,05592 | 4,30E-24 |
| CCL2      | -2,05704 | 9,45E-05 |
| FBXL2     | -2,05778 | 1,00E-06 |
| FDXACB1   | -2,06042 | 5,53E-07 |
| HEBP1     | -2,06107 | 9,83E-28 |
| IFNGR2    | -2,06188 | 7,87E-12 |
| GLYCTK    | -2,06787 | 3,47E-05 |
| SCRN1     | -2,06955 | 2,99E-36 |
| ADGRG6    | -2,07212 | 3,79E-18 |
| ZBED5-AS1 | -2,07447 | 3,72E-07 |
| ZNF532    | -2,07503 | 4,11E-17 |
| RP2       | -2,07646 | 5,99E-08 |
| TIPARP    | -2,08379 | 6,89E-17 |
| KLHL21    | -2,08401 | 6,88E-26 |
| PRKAA2    | -2,08443 | 1,76E-16 |
| HACD1     | -2,08543 | 3,35E-09 |
| TRIM14    | -2,09198 | 1,58E-07 |
| ADAP2     | -2,09327 | 1,64E-05 |
| GFRA1     | -2,09327 | 1,10E-11 |
| PFKP      | -2,09335 | 5,26E-17 |
| FAT1      | -2,09357 | 2,48E-12 |
| DERA      | -2,09411 | 3,64E-28 |
| POFUT1    | -2,09439 | 1,13E-22 |
| EOGT      | -2,0945  | 6,61E-09 |
| SEPT9     | -2,09493 | 5,00E-08 |
| SLC2A6    | -2,09623 | 0,000183 |
| RBM24     | -2,09794 | 9,62E-07 |
| CEP85L    | -2,09933 | 2,86E-05 |
| FRMD4A    | -2,10146 | 5,04E-10 |

|           |          |          |
|-----------|----------|----------|
| MPRIP     | -2,10269 | 2,29E-24 |
| UTRN      | -2,10272 | 1,96E-12 |
| TPST1     | -2,10949 | 5,22E-08 |
| TWF2      | -2,11103 | 2,03E-30 |
| USP40     | -2,11241 | 2,17E-24 |
| SDK1      | -2,1173  | 2,54E-11 |
| EXOG      | -2,11744 | 0,000189 |
| SH3RF1    | -2,11959 | 2,60E-08 |
| ADCY7     | -2,12259 | 9,40E-19 |
| SMCO4     | -2,12517 | 6,18E-05 |
| FABP5     | -2,12551 | 2,97E-33 |
| CEP112    | -2,12833 | 7,14E-05 |
| VLDLR     | -2,13017 | 0,000278 |
| ITGA6     | -2,13077 | 3,64E-13 |
| ADAM8     | -2,13305 | 0,000404 |
| FAM219A   | -2,13831 | 9,15E-08 |
| LGALS1    | -2,13961 | 5,59E-12 |
| NFE2L3    | -2,14049 | 1,35E-26 |
| SHCBP1    | -2,14207 | 2,07E-30 |
| SH3TC1    | -2,14337 | 1,45E-07 |
| PPFIBP1   | -2,14499 | 5,03E-28 |
| SH2D4A    | -2,14572 | 1,35E-23 |
| DYRK3     | -2,14868 | 2,75E-15 |
| VPS13C    | -2,14967 | 7,39E-15 |
| HOXB7     | -2,15055 | 1,39E-16 |
| PPM1F     | -2,1513  | 3,12E-09 |
| CYTH3     | -2,15277 | 2,08E-22 |
| DOCK1     | -2,1532  | 2,10E-19 |
| S100A6    | -2,15382 | 3,22E-11 |
| MLPH      | -2,15384 | 4,60E-29 |
| TMEM55A   | -2,15399 | 5,79E-13 |
| LOC101927 | -2,15456 | 0,000216 |
| PINK1     | -2,15752 | 2,91E-05 |
| PPAP2B    | -2,16241 | 1,05E-07 |
| GPR63     | -2,16785 | 0,000414 |
| LHFPL2    | -2,16856 | 5,73E-25 |
| LRRC20    | -2,17149 | 9,21E-11 |
| GATA6     | -2,17262 | 9,06E-10 |
| RASSF3    | -2,17304 | 9,43E-19 |
| GLIS2     | -2,18098 | 7,38E-29 |
| BACE2     | -2,18185 | 3,58E-19 |
| MOCOS     | -2,18331 | 8,45E-08 |
| GLDC      | -2,18873 | 3,15E-06 |
| RIPK4     | -2,18877 | 5,32E-20 |
| STK17A    | -2,19069 | 1,75E-26 |
| CAMK2D    | -2,19154 | 1,19E-15 |
| C16orf45  | -2,19296 | 6,93E-08 |
| QKI       | -2,19826 | 1,86E-15 |
| FUCA1     | -2,2     | 5,41E-15 |
| IL17RD    | -2,20359 | 1,22E-21 |

|           |          |          |
|-----------|----------|----------|
| ZNF792    | -2,20586 | 1,60E-08 |
| DNAJC22   | -2,20817 | 2,78E-16 |
| C18orf54  | -2,20943 | 3,93E-17 |
| LOC389831 | -2,20961 | 1,26E-07 |
| WDFY1     | -2,21068 | 9,14E-34 |
| GAB2      | -2,21316 | 8,41E-22 |
| TPCN1     | -2,21523 | 2,95E-29 |
| SLC30A7   | -2,21534 | 6,84E-18 |
| FYCO1     | -2,21544 | 4,42E-12 |
| B4GALT6   | -2,21624 | 1,11E-12 |
| ST6GALNA4 | -2,21801 | 2,40E-19 |
| LOC90768  | -2,21979 | 2,08E-08 |
| MKNK2     | -2,2221  | 2,77E-29 |
| GMPR      | -2,22222 | 0,000116 |
| AP1S3     | -2,22612 | 1,27E-13 |
| AKIP1     | -2,23128 | 2,08E-19 |
| LIMS1     | -2,23546 | 1,70E-45 |
| FAM20C    | -2,23834 | 4,09E-22 |
| NMI       | -2,23966 | 7,13E-08 |
| CFL2      | -2,24293 | 5,54E-24 |
| OAS3      | -2,24318 | 0,000717 |
| TNFRSF11A | -2,24429 | 3,34E-11 |
| CEP19     | -2,24619 | 2,84E-07 |
| SORBS3    | -2,24752 | 5,29E-33 |
| LAMA3     | -2,2478  | 2,83E-17 |
| SCCPDH    | -2,25241 | 2,55E-19 |
| STARD3NL  | -2,25478 | 4,87E-13 |
| LIMA1     | -2,25483 | 1,74E-10 |
| MAP3K8    | -2,2589  | 0,000563 |
| FAM46A    | -2,26065 | 1,64E-06 |
| SPATS2L   | -2,26193 | 2,11E-27 |
| GAS6      | -2,26392 | 1,17E-15 |
| FNDC3B    | -2,2651  | 7,97E-37 |
| EDA2R     | -2,26569 | 3,07E-07 |
| LOC100125 | -2,2713  | 6,81E-05 |
| ARHGAP18  | -2,27192 | 3,50E-19 |
| RASL10B   | -2,27399 | 1,36E-08 |
| STEAP3    | -2,27522 | 2,83E-17 |
| HIVEP2    | -2,27815 | 2,50E-31 |
| TMEM51    | -2,27929 | 3,12E-24 |
| IFI27L2   | -2,2796  | 0,000962 |
| FJX1      | -2,27966 | 2,50E-06 |
| INAFM2    | -2,28105 | 2,26E-08 |
| FADS1     | -2,28879 | 1,20E-16 |
| OCIAD2    | -2,28986 | 2,19E-21 |
| GSDMD     | -2,29243 | 4,08E-06 |
| TPP1      | -2,29335 | 1,83E-22 |
| A4GALT    | -2,29548 | 0,000285 |
| PCOLCE2   | -2,29846 | 1,57E-10 |
| TMEM8B    | -2,29951 | 3,51E-07 |

|          |          |          |
|----------|----------|----------|
| SKAP2    | -2,29996 | 4,32E-26 |
| ZNF462   | -2,30075 | 2,02E-16 |
| PAPLN    | -2,30181 | 8,90E-05 |
| SHISA4   | -2,30387 | 0,000126 |
| EHHADH   | -2,30507 | 3,40E-17 |
| CLCN6    | -2,30627 | 3,61E-06 |
| DYNLT3   | -2,31006 | 2,80E-07 |
| EDEM1    | -2,31382 | 5,49E-28 |
| SSFA2    | -2,31503 | 1,22E-40 |
| LEPROT   | -2,31515 | 5,91E-30 |
| PMAIP1   | -2,31528 | 5,46E-10 |
| CDCA7L   | -2,31597 | 1,07E-09 |
| ERAP1    | -2,32068 | 7,21E-26 |
| ATP10D   | -2,32236 | 2,98E-08 |
| ABCC4    | -2,32281 | 2,35E-32 |
| FARP1    | -2,3278  | 2,22E-31 |
| FAM3C    | -2,3281  | 9,59E-35 |
| RGL1     | -2,32821 | 3,81E-12 |
| STOML1   | -2,33224 | 2,38E-10 |
| PARP12   | -2,33349 | 5,00E-08 |
| SLC8B1   | -2,33534 | 4,00E-14 |
| IFFO2    | -2,33797 | 2,87E-20 |
| PARVB    | -2,33871 | 9,04E-30 |
| SLC35E4  | -2,33883 | 4,81E-13 |
| SEC14L1  | -2,33907 | 8,01E-30 |
| DRAM1    | -2,33926 | 8,22E-18 |
| CHM      | -2,34851 | 8,47E-08 |
| APAF1    | -2,35152 | 2,25E-08 |
| PDLIM1   | -2,35352 | 1,96E-46 |
| LBR      | -2,3564  | 1,26E-30 |
| TMEM56   | -2,35698 | 1,03E-11 |
| FLNB     | -2,35796 | 2,93E-21 |
| CYFIP2   | -2,36549 | 1,84E-09 |
| BEX4     | -2,37065 | 2,65E-12 |
| ARHGAP26 | -2,37272 | 8,38E-06 |
| PAG1     | -2,37479 | 1,98E-06 |
| PELI1    | -2,37499 | 1,75E-06 |
| GLI3     | -2,37718 | 5,22E-18 |
| FAM65A   | -2,37729 | 9,38E-33 |
| STX3     | -2,38035 | 5,34E-19 |
| ARNT2    | -2,38303 | 3,81E-26 |
| MAPKAPK3 | -2,3857  | 2,54E-23 |
| DENND5A  | -2,38743 | 2,33E-15 |
| PTPRG    | -2,389   | 4,21E-25 |
| FAM107B  | -2,39025 | 2,34E-09 |
| MPDZ     | -2,39327 | 7,22E-17 |
| LCA5     | -2,39365 | 1,10E-05 |
| HDAC4    | -2,40194 | 0,00024  |
| PAM      | -2,40797 | 1,48E-26 |
| ZMYM6NB  | -2,40957 | 3,52E-09 |

|           |          |          |
|-----------|----------|----------|
| DTX3L     | -2,41092 | 3,70E-13 |
| GRB10     | -2,41465 | 7,69E-05 |
| ABHD2     | -2,41517 | 4,11E-21 |
| CSRNP1    | -2,41861 | 1,42E-18 |
| TMEM44    | -2,41946 | 7,03E-14 |
| CLIP2     | -2,42757 | 1,06E-29 |
| OPHN1     | -2,42917 | 5,22E-19 |
| PITPNM1   | -2,43052 | 1,64E-18 |
| P3H1      | -2,43461 | 2,81E-29 |
| CITED4    | -2,43491 | 1,84E-14 |
| RHOF      | -2,43563 | 3,55E-40 |
| TUBB2B    | -2,43856 | 6,77E-10 |
| KLF12     | -2,44067 | 2,34E-14 |
| FAM114A1  | -2,44146 | 2,32E-08 |
| SNX9      | -2,44208 | 5,26E-34 |
| SIK2      | -2,44235 | 6,43E-29 |
| SLC25A12  | -2,44378 | 5,61E-24 |
| SLCO3A1   | -2,44753 | 4,75E-19 |
| MAMLD1    | -2,44855 | 1,42E-08 |
| SGK223    | -2,44917 | 2,07E-30 |
| TIMP1     | -2,4515  | 9,28E-06 |
| NEK6      | -2,45515 | 2,06E-38 |
| HOXA5     | -2,45641 | 7,93E-07 |
| KDELC1    | -2,45797 | 1,74E-18 |
| KCND1     | -2,46263 | 0,000528 |
| BICD1     | -2,4634  | 4,01E-24 |
| SH3BP4    | -2,46591 | 8,83E-32 |
| FAM126A   | -2,47    | 1,86E-17 |
| HNMT      | -2,4712  | 8,00E-05 |
| LOC441666 | -2,47132 | 1,82E-06 |
| DCBLD1    | -2,47356 | 1,70E-16 |
| MMP16     | -2,4755  | 2,33E-11 |
| PITPNM2   | -2,47696 | 2,09E-17 |
| LOC654342 | -2,47939 | 8,46E-12 |
| ANXA2P3   | -2,48041 | 4,04E-05 |
| YAP1      | -2,48089 | 1,83E-36 |
| PLEKHG4   | -2,48313 | 1,38E-14 |
| ITPRIPL2  | -2,4833  | 5,71E-33 |
| TSPAN9    | -2,48591 | 1,71E-09 |
| GALNT7    | -2,48658 | 5,78E-16 |
| PEA15     | -2,4875  | 2,62E-29 |
| PLAGL1    | -2,48925 | 5,07E-14 |
| CENPV     | -2,49332 | 6,76E-08 |
| LACTB     | -2,49523 | 2,03E-06 |
| ASRGL1    | -2,49538 | 9,34E-17 |
| ZCCHC24   | -2,49539 | 1,42E-07 |
| STRIP2    | -2,49766 | 1,64E-08 |
| SDCBP     | -2,4977  | 1,56E-16 |
| CLTCL1    | -2,49992 | 7,94E-12 |
| CIB2      | -2,50327 | 0,000644 |

|          |          |          |
|----------|----------|----------|
| USB1     | -2,50777 | 1,01E-14 |
| MAP7D1   | -2,50849 | 4,80E-27 |
| RNF145   | -2,5092  | 5,86E-11 |
| FMNL3    | -2,5111  | 3,71E-35 |
| AMOTL1   | -2,51427 | 4,08E-41 |
| ST3GAL3  | -2,51703 | 4,71E-14 |
| DEGS1    | -2,51949 | 5,58E-19 |
| ZNF488   | -2,51965 | 0,000347 |
| TBC1D8B  | -2,52131 | 1,73E-05 |
| SMPD1    | -2,52306 | 2,19E-07 |
| ZNF697   | -2,52349 | 5,83E-19 |
| SDC2     | -2,5241  | 1,22E-38 |
| CHD9     | -2,52436 | 1,39E-27 |
| TNIK     | -2,52484 | 2,91E-16 |
| ETHE1    | -2,52757 | 6,89E-21 |
| KIAA0754 | -2,52817 | 2,04E-16 |
| MATN2    | -2,5284  | 2,70E-30 |
| ACSL1    | -2,53215 | 1,36E-36 |
| NF2      | -2,53293 | 1,45E-34 |
| WWC2     | -2,53653 | 8,82E-34 |
| PARP3    | -2,53845 | 1,14E-26 |
| CNTLN    | -2,54064 | 4,39E-14 |
| NPTX1    | -2,5422  | 0,000598 |
| COL4A5   | -2,54467 | 5,69E-09 |
| EVA1B    | -2,5459  | 2,06E-07 |
| QPRT     | -2,54599 | 2,46E-12 |
| PRDM5    | -2,5508  | 3,02E-05 |
| KBTBD8   | -2,55119 | 0,000141 |
| PML      | -2,55601 | 3,33E-10 |
| SYNPO    | -2,55607 | 6,34E-07 |
| PLCB4    | -2,55759 | 2,30E-24 |
| SLC5A3   | -2,55898 | 1,02E-39 |
| FAM92A1  | -2,55962 | 1,59E-06 |
| MTMR10   | -2,56216 | 7,01E-23 |
| WWTR1    | -2,56248 | 3,06E-48 |
| CDKL1    | -2,56412 | 2,71E-09 |
| FAS      | -2,5664  | 0,000277 |
| TMOD1    | -2,57046 | 1,25E-09 |
| RFX2     | -2,5705  | 1,58E-18 |
| PRTG     | -2,5722  | 6,46E-15 |
| UGCG     | -2,57305 | 2,22E-31 |
| TMX3     | -2,5745  | 1,95E-28 |
| ETV6     | -2,57704 | 1,62E-34 |
| PTPRJ    | -2,57848 | 9,65E-30 |
| HHAT     | -2,58136 | 1,92E-14 |
| FOSL2    | -2,58193 | 2,23E-27 |
| ARHGEF25 | -2,58235 | 6,07E-16 |
| FKBP1B   | -2,5847  | 0,000444 |
| SGPP2    | -2,58529 | 1,74E-09 |
| ADAM10   | -2,58571 | 1,11E-47 |

|           |          |          |
|-----------|----------|----------|
| MYADM     | -2,59019 | 1,39E-14 |
| PLOD2     | -2,59128 | 5,53E-50 |
| LZTS3     | -2,59736 | 2,75E-06 |
| ARHGEF10  | -2,59766 | 6,87E-13 |
| BIRC2     | -2,60725 | 2,15E-20 |
| ABTB2     | -2,60814 | 5,26E-34 |
| ZMAT3     | -2,60893 | 5,75E-07 |
| RASA3     | -2,61186 | 8,77E-21 |
| RPS6KA6   | -2,61362 | 6,92E-05 |
| RIN3      | -2,62209 | 4,63E-12 |
| DLC1      | -2,62486 | 3,32E-30 |
| FAM229B   | -2,62583 | 8,82E-06 |
| SLC26A2   | -2,62636 | 2,29E-50 |
| DOCK4     | -2,62946 | 2,90E-14 |
| CORO1C    | -2,62949 | 3,17E-60 |
| RPS6KA2   | -2,63035 | 4,66E-16 |
| TREX1     | -2,63185 | 1,41E-11 |
| SEPT11    | -2,6327  | 1,73E-62 |
| RTTN      | -2,6328  | 1,09E-14 |
| GNPDA2    | -2,63323 | 7,82E-12 |
| STARD9    | -2,63406 | 0,000593 |
| SEPT4     | -2,63822 | 9,32E-10 |
| SERPINB8  | -2,64695 | 3,87E-10 |
| CUEDC1    | -2,64703 | 1,77E-38 |
| FAM135A   | -2,64944 | 3,84E-14 |
| PKD2      | -2,6546  | 3,92E-32 |
| RRAS2     | -2,65536 | 2,61E-24 |
| MET       | -2,65836 | 1,23E-63 |
| FAM110B   | -2,6585  | 3,44E-18 |
| SMAD3     | -2,65913 | 8,51E-17 |
| RAB31     | -2,66333 | 1,14E-10 |
| SPNS2     | -2,66455 | 3,51E-11 |
| ATAD3B    | -2,66595 | 9,33E-13 |
| NPHP3     | -2,67121 | 0,000378 |
| KCTD17    | -2,67136 | 9,49E-13 |
| LOC730102 | -2,68071 | 0,000353 |
| KDELC2    | -2,68722 | 2,31E-31 |
| FLT3LG    | -2,68895 | 9,73E-05 |
| NKX3-1    | -2,69354 | 2,30E-12 |
| DENND5B   | -2,70378 | 2,95E-19 |
| ITGA2     | -2,70507 | 3,04E-39 |
| CPOX      | -2,70636 | 8,65E-15 |
| VOPP1     | -2,71132 | 2,46E-32 |
| MICALCL   | -2,71269 | 1,93E-05 |
| CADM1     | -2,71329 | 6,12E-44 |
| FSTL3     | -2,71461 | 1,46E-13 |
| PRRG1     | -2,71513 | 5,50E-07 |
| CCDC50    | -2,71542 | 2,26E-31 |
| SGMS2     | -2,71632 | 8,70E-12 |
| FERMT1    | -2,71726 | 1,10E-35 |

|           |          |          |
|-----------|----------|----------|
| THRB      | -2,72266 | 9,77E-11 |
| FOXO3     | -2,72787 | 1,59E-17 |
| CCDC88B   | -2,72819 | 4,03E-08 |
| CPNE2     | -2,73066 | 1,39E-13 |
| PRAME     | -2,73262 | 4,54E-09 |
| BIVM      | -2,73529 | 1,31E-09 |
| ZYX       | -2,73739 | 8,35E-35 |
| APOL2     | -2,73804 | 1,08E-05 |
| ADGRL3    | -2,7434  | 0,000216 |
| DOCK5     | -2,74484 | 5,95E-32 |
| DPY19L2P2 | -2,76021 | 0,000184 |
| PPP2R2B   | -2,76113 | 0,000547 |
| HSD17B12  | -2,76257 | 2,67E-59 |
| HIVEP3    | -2,76308 | 7,82E-05 |
| LRRC6     | -2,76312 | 9,79E-06 |
| ANO6      | -2,76633 | 9,34E-37 |
| L3MBTL3   | -2,767   | 2,51E-18 |
| LRP12     | -2,76865 | 3,91E-50 |
| RBPM5     | -2,7711  | 1,68E-51 |
| RCAN1     | -2,77157 | 7,15E-17 |
| GALNT10   | -2,77649 | 9,39E-53 |
| PLLP      | -2,77702 | 0,000944 |
| ITPRIP    | -2,77805 | 2,17E-09 |
| REXO2     | -2,77834 | 1,71E-21 |
| EHD2      | -2,7797  | 7,53E-38 |
| GXYLT2    | -2,78296 | 1,33E-10 |
| PLEC      | -2,78704 | 1,13E-11 |
| TRIM5     | -2,78745 | 1,35E-12 |
| RDX       | -2,79028 | 5,53E-37 |
| MGAT5B    | -2,79392 | 3,91E-12 |
| OSMR      | -2,79412 | 2,42E-15 |
| CHIC1     | -2,7959  | 1,67E-11 |
| PIDD1     | -2,79651 | 8,24E-42 |
| HOPX      | -2,79758 | 0,000283 |
| THBS1     | -2,805   | 2,49E-13 |
| SAMHD1    | -2,81228 | 7,65E-11 |
| KIAA1462  | -2,81964 | 3,54E-07 |
| PRKCE     | -2,82142 | 4,09E-08 |
| ALCAM     | -2,82162 | 2,51E-34 |
| KIF17     | -2,82217 | 4,08E-05 |
| SWAP70    | -2,82461 | 1,28E-39 |
| GPRC5A    | -2,83016 | 6,47E-06 |
| KAT2B     | -2,83113 | 7,61E-13 |
| WDR90     | -2,84212 | 1,49E-13 |
| RASSF2    | -2,84638 | 1,16E-13 |
| SLC9A7    | -2,84756 | 2,55E-13 |
| RECK      | -2,85058 | 1,73E-06 |
| EPS8L2    | -2,85481 | 2,08E-20 |
| ARAP2     | -2,85734 | 8,80E-27 |
| PYGO1     | -2,85791 | 4,68E-11 |



|           |          |          |
|-----------|----------|----------|
| RELB      | -2,85804 | 2,59E-13 |
| CMTM1     | -2,85875 | 0,00025  |
| WNT7B     | -2,8594  | 4,44E-17 |
| TCF7      | -2,86642 | 6,16E-25 |
| BEND7     | -2,87712 | 3,47E-20 |
| BTC       | -2,87753 | 9,02E-06 |
| TMCC1-AS1 | -2,87756 | 8,90E-09 |
| CAMK1D    | -2,87761 | 6,85E-28 |
| PRPS2     | -2,87816 | 7,17E-39 |
| OGFRL1    | -2,88095 | 7,98E-34 |
| MRAS      | -2,88233 | 5,85E-20 |
| PDZD2     | -2,88671 | 0,000456 |
| CAPG      | -2,8892  | 7,06E-53 |
| ATP6V1B2  | -2,88952 | 3,08E-64 |
| PLK3      | -2,89131 | 1,01E-14 |
| GPR39     | -2,8954  | 8,51E-10 |
| SEMA7A    | -2,89968 | 1,61E-33 |
| SORBS1    | -2,90155 | 1,41E-19 |
| OTUB2     | -2,90283 | 3,32E-08 |
| SH3BGR1   | -2,90421 | 1,45E-25 |
| HOOK3     | -2,90591 | 3,54E-37 |
| SLC37A2   | -2,90765 | 1,64E-05 |
| SLC1A3    | -2,90795 | 1,54E-14 |
| SERPINA1  | -2,90832 | 4,00E-17 |
| NUAK2     | -2,91078 | 1,32E-24 |
| FAM189A2  | -2,9136  | 0,000255 |
| SIM2      | -2,91913 | 6,85E-24 |
| SLC39A13  | -2,92324 | 1,29E-48 |
| ALS2CL    | -2,92358 | 2,40E-12 |
| HOXA1     | -2,92545 | 4,78E-07 |
| HLA-C     | -2,92664 | 6,14E-08 |
| ATP2B4    | -2,92963 | 1,86E-18 |
| FADS3     | -2,93229 | 1,70E-46 |
| KLHL29    | -2,93363 | 5,92E-13 |
| CHST7     | -2,93417 | 1,04E-10 |
| NEDD4L    | -2,93949 | 1,07E-32 |
| CACNA2D1  | -2,94395 | 5,51E-42 |
| CYLD      | -2,94396 | 7,86E-08 |
| FKBP14    | -2,94627 | 4,49E-35 |
| KLHL5     | -2,9492  | 5,29E-52 |
| PQLC2L    | -2,95174 | 3,76E-05 |
| SPEG      | -2,95264 | 7,99E-15 |
| CAPN5     | -2,95828 | 8,39E-09 |
| HOXA11    | -2,95869 | 0,0001   |
| SLC23A2   | -2,96304 | 1,57E-55 |
| TNS3      | -2,96638 | 1,21E-21 |
| SPON2     | -2,97499 | 1,55E-05 |
| GPRC5B    | -2,97873 | 9,00E-12 |
| TMEM154   | -2,98053 | 2,83E-13 |
| MICB      | -2,98467 | 3,54E-16 |

|           |          |          |
|-----------|----------|----------|
| PHLDA2    | -2,9856  | 3,63E-10 |
| PGM5      | -2,99117 | 4,20E-16 |
| AHNAK     | -2,99593 | 1,26E-36 |
| QPCT      | -2,99778 | 8,28E-12 |
| CTSC      | -3,00049 | 1,29E-56 |
| MARCKS    | -3,00366 | 8,03E-63 |
| DHRS3     | -3,00634 | 2,14E-13 |
| KIF13B    | -3,01299 | 1,95E-10 |
| COCH      | -3,01712 | 3,99E-13 |
| TSPAN4    | -3,01781 | 1,78E-19 |
| SOWAHC    | -3,01961 | 1,62E-18 |
| STOM      | -3,02347 | 1,12E-58 |
| PHLDB1    | -3,03358 | 8,01E-61 |
| CCDC82    | -3,03455 | 4,95E-12 |
| ANKMY2    | -3,03493 | 9,62E-37 |
| KCNIP3    | -3,03807 | 5,84E-36 |
| ANKRD29   | -3,04023 | 0,000198 |
| GRK5      | -3,04653 | 1,57E-11 |
| LOC101927 | -3,05005 | 0,000249 |
| GDPD5     | -3,05078 | 6,75E-07 |
| GOLM1     | -3,05082 | 2,14E-69 |
| MYH9      | -3,05085 | 6,05E-45 |
| PBX3      | -3,05472 | 2,49E-43 |
| VCL       | -3,05877 | 3,50E-22 |
| PARP10    | -3,06302 | 1,51E-15 |
| TNFSF9    | -3,06348 | 3,96E-06 |
| IKBIP     | -3,06886 | 4,13E-13 |
| CASK      | -3,07835 | 1,49E-68 |
| PDP1      | -3,07939 | 2,71E-54 |
| MALT1     | -3,08043 | 4,45E-67 |
| GPAT3     | -3,08125 | 1,50E-11 |
| CCDC68    | -3,08219 | 0,000132 |
| MKLN1-AS  | -3,08475 | 3,58E-05 |
| MYO1E     | -3,08597 | 9,77E-17 |
| C19orf66  | -3,08933 | 2,05E-07 |
| FNIP2     | -3,0935  | 1,01E-08 |
| CARD10    | -3,09473 | 8,15E-29 |
| CTNNAL1   | -3,09747 | 7,13E-25 |
| APOBEC3B  | -3,10454 | 5,26E-32 |
| KAZN      | -3,10997 | 3,59E-33 |
| RAI14     | -3,11227 | 4,75E-37 |
| ANK1      | -3,11342 | 0,000322 |
| PRKD1     | -3,11348 | 2,84E-11 |
| HTR7      | -3,12103 | 0,000576 |
| TK2       | -3,12149 | 4,67E-22 |
| RRAS      | -3,12536 | 7,97E-15 |
| PAK1      | -3,12604 | 2,23E-23 |
| JAG1      | -3,12927 | 3,74E-36 |
| NXN       | -3,13038 | 1,37E-58 |
| ST6GALNA6 | -3,13251 | 2,74E-15 |

|           |          |          |
|-----------|----------|----------|
| CTSB      | -3,13589 | 9,57E-26 |
| NXPE3     | -3,14007 | 5,05E-10 |
| EPB41L4A  | -3,14644 | 8,63E-12 |
| RUSC2     | -3,14879 | 7,62E-20 |
| AKAP3     | -3,15082 | 4,92E-05 |
| B4GALT5   | -3,15232 | 6,86E-67 |
| LIMD2     | -3,15259 | 1,13E-13 |
| ENDOD1    | -3,15263 | 2,09E-59 |
| RAPGEF5   | -3,15592 | 4,81E-15 |
| CPQ       | -3,15766 | 3,83E-09 |
| ZNF880    | -3,15808 | 3,07E-06 |
| TMSB4X    | -3,15816 | 5,72E-81 |
| ITGB1     | -3,15936 | 4,81E-84 |
| PRR5L     | -3,1653  | 2,66E-13 |
| ITGAV     | -3,16633 | 3,17E-46 |
| IL6ST     | -3,16811 | 2,91E-50 |
| MAPK10    | -3,16896 | 4,85E-05 |
| COL16A1   | -3,17049 | 1,39E-12 |
| TPM2      | -3,17188 | 1,40E-07 |
| CHRNA1    | -3,17291 | 6,32E-17 |
| DOCK10    | -3,17303 | 1,59E-12 |
| GPATCH11  | -3,1817  | 5,31E-44 |
| GPR37     | -3,19067 | 1,51E-08 |
| TPM1      | -3,19357 | 5,01E-86 |
| OAF       | -3,19781 | 1,24E-30 |
| AKAP7     | -3,19793 | 4,62E-07 |
| ZNF513    | -3,19819 | 1,51E-05 |
| PRKAR2A   | -3,20308 | 3,28E-38 |
| SPATA18   | -3,20431 | 4,14E-07 |
| DHCR24    | -3,20558 | 1,80E-31 |
| TRPV2     | -3,20666 | 0,000178 |
| CRACR2A   | -3,21947 | 3,67E-06 |
| SDC4      | -3,22301 | 1,32E-33 |
| PCDHB5    | -3,22375 | 0,0006   |
| GPC1      | -3,22778 | 1,74E-53 |
| STAMBPL1  | -3,23517 | 7,56E-08 |
| CD163L1   | -3,23545 | 0,000172 |
| EFHD2     | -3,24689 | 2,01E-46 |
| FXD5      | -3,24898 | 1,60E-40 |
| LINC01515 | -3,25089 | 6,95E-05 |
| GLS       | -3,25273 | 2,24E-66 |
| HIPK2     | -3,2579  | 7,92E-23 |
| UPP1      | -3,26199 | 1,11E-07 |
| DNM1      | -3,26251 | 2,08E-46 |
| DNAJB4    | -3,26427 | 3,81E-10 |
| PLEK2     | -3,26614 | 5,41E-44 |
| CRIP1     | -3,26805 | 9,05E-12 |
| LOC100288 | -3,26858 | 2,38E-05 |
| C1R       | -3,27035 | 5,57E-10 |
| SYNM      | -3,27062 | 4,49E-21 |

|          |          |          |
|----------|----------|----------|
| PGM1     | -3,27101 | 2,95E-34 |
| GNG12    | -3,27249 | 2,12E-60 |
| SPHK1    | -3,27336 | 8,79E-40 |
| COL1A1   | -3,28091 | 2,30E-41 |
| BTBD11   | -3,28182 | 6,65E-30 |
| HCAR1    | -3,28382 | 7,56E-10 |
| JAK1     | -3,28498 | 1,47E-53 |
| PXDN     | -3,28529 | 4,70E-44 |
| LGR4     | -3,29107 | 3,38E-33 |
| ABHD6    | -3,30476 | 2,74E-19 |
| ANKRD13A | -3,30542 | 5,76E-23 |
| VWA5A    | -3,30655 | 0,00019  |
| PTPRH    | -3,30768 | 0,000158 |
| CD82     | -3,3142  | 9,56E-35 |
| AFF3     | -3,31554 | 3,82E-22 |
| HYI      | -3,32041 | 2,82E-15 |
| UBE2L6   | -3,32554 | 4,33E-12 |
| FAM167A  | -3,32617 | 8,22E-05 |
| ALDH3B1  | -3,33444 | 6,15E-09 |
| SERPINE2 | -3,33464 | 4,25E-21 |
| TEX15    | -3,34624 | 2,32E-47 |
| MACC1    | -3,3508  | 1,46E-10 |
| SYNJ2    | -3,3552  | 1,18E-75 |
| SYDE1    | -3,35741 | 1,98E-33 |
| GALNT2   | -3,35964 | 6,76E-92 |
| PALLD    | -3,36194 | 2,34E-34 |
| ST5      | -3,36495 | 1,25E-22 |
| PPM1K    | -3,3905  | 2,12E-12 |
| TRIP10   | -3,39742 | 2,01E-27 |
| CLCF1    | -3,42535 | 7,05E-07 |
| SPRY2    | -3,42555 | 5,47E-21 |
| PALM2    | -3,42697 | 2,08E-08 |
| PITX2    | -3,42847 | 1,14E-12 |
| COPZ2    | -3,42991 | 1,85E-16 |
| TUBB2A   | -3,43092 | 7,37E-16 |
| ARHGAP24 | -3,43162 | 3,16E-11 |
| ADGRB2   | -3,44646 | 2,79E-27 |
| NRK      | -3,4477  | 6,91E-07 |
| DLG4     | -3,45199 | 5,59E-16 |
| CDK14    | -3,45267 | 5,63E-19 |
| GPR176   | -3,4589  | 1,71E-13 |
| PRTFDC1  | -3,46787 | 1,55E-27 |
| C12orf75 | -3,46864 | 4,78E-70 |
| PRNP     | -3,47213 | 1,22E-38 |
| SLC6A8   | -3,47383 | 4,02E-21 |
| NCR3LG1  | -3,4781  | 1,08E-15 |
| ARPIN    | -3,48075 | 1,19E-28 |
| IRF1     | -3,48142 | 2,65E-35 |
| SYTL5    | -3,48149 | 1,70E-14 |
| FEZ1     | -3,48271 | 6,63E-24 |

|          |          |          |
|----------|----------|----------|
| CNTNAP1  | -3,48621 | 5,29E-24 |
| PLIN2    | -3,48767 | 6,05E-35 |
| TUBB4A   | -3,49164 | 7,58E-23 |
| COL5A1   | -3,49548 | 9,45E-17 |
| RILPL2   | -3,49863 | 2,99E-13 |
| SLC16A2  | -3,50037 | 5,69E-10 |
| KCTD12   | -3,50782 | 1,23E-26 |
| SLC16A3  | -3,50908 | 4,06E-14 |
| DDX60L   | -3,51163 | 1,68E-19 |
| SBF2     | -3,51413 | 1,04E-18 |
| CITED2   | -3,51568 | 3,72E-55 |
| CACNA2D4 | -3,51628 | 5,26E-05 |
| HOXA4    | -3,52966 | 4,38E-15 |
| KCCAT333 | -3,53078 | 0,000302 |
| NAV1     | -3,53219 | 1,04E-16 |
| CLCN4    | -3,53275 | 3,25E-16 |
| SERINC2  | -3,53491 | 4,56E-29 |
| ZDHHC8P1 | -3,53721 | 8,46E-09 |
| ABCB4    | -3,53831 | 1,46E-09 |
| WIPF1    | -3,54297 | 2,71E-24 |
| SLC9A5   | -3,5446  | 3,30E-08 |
| ZBTB38   | -3,55459 | 5,96E-69 |
| COL27A1  | -3,55495 | 4,14E-14 |
| MATN3    | -3,55717 | 2,99E-11 |
| FAM63B   | -3,56061 | 1,49E-21 |
| ZNF264   | -3,56216 | 2,02E-21 |
| IFI27    | -3,56326 | 5,97E-07 |
| ADPRH    | -3,57474 | 2,89E-16 |
| SLC2A3   | -3,57718 | 1,51E-06 |
| MLLT11   | -3,58314 | 8,50E-17 |
| SORBS2   | -3,60133 | 8,42E-06 |
| GRIK4    | -3,60263 | 0,000345 |
| ACSL4    | -3,62889 | 1,07E-52 |
| PLCE1    | -3,63253 | 8,14E-06 |
| SIPA1    | -3,63538 | 1,86E-38 |
| DCDC2    | -3,6387  | 6,88E-66 |
| TMEM178f | -3,64001 | 1,90E-82 |
| GABARAPL | -3,64231 | 2,27E-06 |
| PTGR1    | -3,64807 | 1,33E-25 |
| SLC1A1   | -3,65016 | 6,35E-08 |
| SUSD1    | -3,65036 | 2,91E-50 |
| LOXL1    | -3,65364 | 1,59E-36 |
| MAP1B    | -3,65891 | 1,78E-23 |
| LRP1     | -3,66262 | 6,11E-12 |
| LYST     | -3,66482 | 1,06E-22 |
| WLS      | -3,66588 | 5,19E-32 |
| PARVA    | -3,66659 | 7,51E-55 |
| APOLD1   | -3,67131 | 9,24E-05 |
| TSPAN2   | -3,67749 | 5,75E-05 |
| SEC14L2  | -3,68146 | 1,43E-19 |

|            |          |          |
|------------|----------|----------|
| FOXD1      | -3,68548 | 2,67E-09 |
| SFXN3      | -3,69401 | 7,41E-46 |
| DPY19L2P1  | -3,69531 | 6,76E-15 |
| FADS2      | -3,69888 | 1,64E-77 |
| F2R        | -3,70183 | 3,22E-73 |
| PMP22      | -3,70398 | 3,50E-14 |
| SQRDL      | -3,70682 | 8,94E-22 |
| HBEGF      | -3,70969 | 1,59E-31 |
| AFAP1L2    | -3,71685 | 3,55E-36 |
| TBC1D2     | -3,71878 | 2,65E-19 |
| ZBTB47     | -3,72175 | 3,86E-09 |
| STEAP1     | -3,72305 | 1,68E-12 |
| DNM3       | -3,72409 | 0,000264 |
| ATP8B3     | -3,72696 | 0,000272 |
| ISPD       | -3,72741 | 7,53E-06 |
| FCGRT      | -3,73428 | 1,94E-12 |
| CACNA2D3   | -3,73989 | 2,18E-10 |
| HLA-A      | -3,74    | 2,70E-55 |
| HOGA1      | -3,74063 | 4,06E-11 |
| SLFN11     | -3,74354 | 4,65E-30 |
| CD59       | -3,74807 | 1,19E-28 |
| TYW1B      | -3,7482  | 1,19E-09 |
| FILIP1L    | -3,75254 | 2,73E-22 |
| HNF4G      | -3,75435 | 3,20E-09 |
| C3orf18    | -3,76425 | 1,08E-07 |
| SLC16A1-A' | -3,76458 | 0,000176 |
| TPK1       | -3,77082 | 4,64E-29 |
| DUSP7      | -3,77854 | 9,75E-24 |
| CRAT       | -3,7818  | 3,30E-15 |
| AIM1L      | -3,78954 | 6,50E-23 |
| MAF        | -3,79673 | 3,42E-14 |
| B3GNT9     | -3,79857 | 3,84E-08 |
| MFGE8      | -3,80543 | 5,21E-71 |
| MAPRE2     | -3,81738 | 1,46E-36 |
| HMG5       | -3,8197  | 1,28E-06 |
| ZNF382     | -3,83396 | 4,12E-08 |
| CCDC88A    | -3,83533 | 1,05E-85 |
| WNK4       | -3,83536 | 9,59E-13 |
| PDGFC      | -3,83604 | 4,12E-14 |
| ARHGAP42   | -3,84275 | 3,47E-13 |
| IL4R       | -3,84674 | 4,78E-28 |
| SLC15A3    | -3,84773 | 1,72E-05 |
| TSPAN1     | -3,85151 | 1,36E-10 |
| SLC30A4    | -3,85299 | 1,66E-06 |
| DNMBP      | -3,85726 | 5,12E-50 |
| IL1RAP     | -3,87064 | 2,60E-17 |
| UNC13D     | -3,87904 | 0,000317 |
| PPARG      | -3,87924 | 9,10E-30 |
| MT2A       | -3,88119 | 5,73E-94 |
| HDX        | -3,88811 | 3,62E-06 |

|           |          |           |
|-----------|----------|-----------|
| ADORA2B   | -3,89946 | 7,84E-33  |
| ADAM9     | -3,89987 | 2,89E-135 |
| TMEM45A   | -3,90774 | 1,69E-08  |
| LRRC8C    | -3,90786 | 2,56E-28  |
| BTN3A1    | -3,90937 | 6,42E-11  |
| IL11      | -3,91071 | 2,60E-06  |
| CD27-AS1  | -3,91345 | 1,11E-08  |
| MGC70870  | -3,91416 | 3,58E-07  |
| P3H2      | -3,91902 | 6,59E-76  |
| SYTL3     | -3,93643 | 1,24E-17  |
| STARD8    | -3,95355 | 1,85E-25  |
| C10orf54  | -3,95711 | 0,000744  |
| GBP2      | -3,96402 | 1,09E-06  |
| ANOS1     | -3,97721 | 5,54E-10  |
| HSPA12A   | -3,97883 | 2,40E-51  |
| FOXO1     | -3,97913 | 1,04E-27  |
| PTPN14    | -3,98269 | 1,86E-107 |
| SASH1     | -3,99091 | 1,24E-26  |
| MGLL      | -3,99412 | 8,58E-23  |
| B3GALT5   | -3,99707 | 1,98E-13  |
| KBTBD11   | -3,99979 | 1,48E-23  |
| RP1L1     | -4,00921 | 0,000744  |
| HOXB13    | -4,01088 | 1,12E-06  |
| ADORA1    | -4,01838 | 1,51E-28  |
| HGD       | -4,02108 | 2,13E-05  |
| C10orf11  | -4,02963 | 5,81E-08  |
| PTRF      | -4,04627 | 3,46E-77  |
| CD68      | -4,0485  | 3,52E-14  |
| CMTM3     | -4,05857 | 3,81E-32  |
| TRAF1     | -4,06593 | 6,67E-19  |
| LRP4      | -4,06927 | 1,44E-32  |
| LINC00152 | -4,07008 | 1,32E-21  |
| IL15RA    | -4,07069 | 1,60E-33  |
| EXT1      | -4,07201 | 4,81E-75  |
| HLA-DPA1  | -4,07969 | 0,000775  |
| TFPI      | -4,08261 | 1,27E-17  |
| ADCY9     | -4,085   | 2,96E-72  |
| TUBA4A    | -4,08854 | 5,75E-13  |
| MCC       | -4,0906  | 5,39E-51  |
| PLEKHA2   | -4,10422 | 3,17E-43  |
| DSEL      | -4,12413 | 4,38E-18  |
| CADPS2    | -4,12879 | 1,33E-06  |
| ZNF257    | -4,13294 | 7,95E-10  |
| PTPRB     | -4,13923 | 1,35E-06  |
| C1S       | -4,14854 | 0,000238  |
| FUT4      | -4,15591 | 1,69E-40  |
| ASPH      | -4,15608 | 5,30E-55  |
| NCEH1     | -4,15795 | 1,38E-55  |
| HOTAIRM1  | -4,16569 | 3,95E-12  |
| LOC101928 | -4,17531 | 0,000629  |

|           |          |           |
|-----------|----------|-----------|
| FAM149A   | -4,17866 | 3,37E-06  |
| GNB4      | -4,18028 | 2,36E-97  |
| TRIM47    | -4,1847  | 1,11E-46  |
| STAT5A    | -4,21253 | 6,53E-05  |
| ULBP3     | -4,21435 | 5,41E-15  |
| SUGCT     | -4,21832 | 7,97E-11  |
| FGF18     | -4,21868 | 4,29E-34  |
| STX1B     | -4,22442 | 6,37E-09  |
| PORCN     | -4,22875 | 1,66E-40  |
| BTN3A3    | -4,24597 | 7,66E-12  |
| COTL1     | -4,24627 | 8,15E-101 |
| EPDR1     | -4,25278 | 1,87E-51  |
| TGFA      | -4,25708 | 3,45E-33  |
| PALD1     | -4,26368 | 2,85E-42  |
| SSC5D     | -4,26952 | 0,000138  |
| PDE2A     | -4,27446 | 4,35E-17  |
| SHISA2    | -4,28196 | 4,91E-37  |
| TRPC1     | -4,2853  | 1,78E-27  |
| C16orf62  | -4,2859  | 3,17E-88  |
| ARL4C     | -4,28711 | 7,48E-122 |
| FAM13A    | -4,28958 | 5,83E-25  |
| HCG4      | -4,29021 | 6,62E-05  |
| CCDC106   | -4,29835 | 3,64E-18  |
| RDH10     | -4,29974 | 5,20E-81  |
| TNFRSF11B | -4,30251 | 5,93E-33  |
| MX1       | -4,30678 | 3,00E-21  |
| CYP4V2    | -4,31698 | 4,60E-16  |
| CACNG8    | -4,3175  | 0,000663  |
| ARHGAP29  | -4,32476 | 3,91E-49  |
| RARB      | -4,32538 | 3,98E-19  |
| EPHX4     | -4,33045 | 7,44E-16  |
| ADAMTS9   | -4,33533 | 2,16E-14  |
| HMCN1     | -4,3378  | 4,22E-53  |
| FRMD5     | -4,34552 | 1,52E-52  |
| CAMK2N1   | -4,34643 | 1,47E-38  |
| GAS6-AS2  | -4,34764 | 9,12E-05  |
| POU2F2    | -4,35395 | 7,40E-08  |
| THBD      | -4,35923 | 6,23E-58  |
| VAMP5     | -4,36313 | 1,14E-11  |
| RHBDL2    | -4,36676 | 3,86E-05  |
| SHISA9    | -4,36822 | 1,67E-64  |
| SCARF1    | -4,37059 | 0,000147  |
| MTCL1     | -4,37795 | 6,53E-50  |
| CHST3     | -4,38628 | 1,22E-13  |
| TGFBR2    | -4,39314 | 6,95E-57  |
| ALDH1A3   | -4,40002 | 0,000106  |
| SPRED1    | -4,40777 | 6,83E-26  |
| GAS6-AS1  | -4,40908 | 1,67E-06  |
| PLK2      | -4,41074 | 1,45E-41  |
| FAM171A1  | -4,41629 | 2,90E-92  |



|           |          |           |
|-----------|----------|-----------|
| WNT5B     | -4,43077 | 6,11E-23  |
| WSCD1     | -4,4328  | 1,13E-81  |
| CD44      | -4,43534 | 5,68E-115 |
| RAB11FIP5 | -4,43631 | 3,36E-27  |
| F2RL1     | -4,43925 | 6,09E-64  |
| VANGL2    | -4,45775 | 7,19E-44  |
| ABLIM3    | -4,4614  | 4,51E-34  |
| CDK6      | -4,46692 | 1,40E-19  |
| CFAP54    | -4,47554 | 2,41E-05  |
| FHL1      | -4,47633 | 1,39E-32  |
| GLIPR2    | -4,4903  | 1,17E-59  |
| FBN2      | -4,49488 | 9,41E-36  |
| ARL4D     | -4,51608 | 7,68E-65  |
| IL6       | -4,52141 | 2,35E-07  |
| ERO1B     | -4,52671 | 1,17E-06  |
| HOXB6     | -4,53858 | 1,66E-08  |
| TCN2      | -4,5416  | 0,00027   |
| AMPD3     | -4,5425  | 2,09E-38  |
| ARNTL2    | -4,55873 | 3,18E-65  |
| GULP1     | -4,56017 | 1,23E-51  |
| COL13A1   | -4,56462 | 0,000183  |
| ROR1      | -4,58596 | 7,30E-54  |
| RBMS2     | -4,58825 | 1,74E-69  |
| OXTR      | -4,58951 | 4,57E-39  |
| EPHB1     | -4,60528 | 2,07E-30  |
| HOXB-AS1  | -4,62061 | 0,000196  |
| OPTN      | -4,6248  | 2,26E-19  |
| HCP5      | -4,63031 | 4,40E-06  |
| DSE       | -4,63193 | 2,39E-71  |
| PLEKHA4   | -4,63427 | 1,76E-18  |
| LBX2      | -4,64793 | 9,32E-05  |
| YOD1      | -4,6484  | 2,78E-17  |
| MXRA7     | -4,65213 | 1,44E-66  |
| C6orf99   | -4,66586 | 2,12E-10  |
| SYNC      | -4,67392 | 2,38E-35  |
| LRRK1     | -4,67546 | 5,94E-41  |
| SYCE1L    | -4,67711 | 8,88E-05  |
| DPP4      | -4,68447 | 5,57E-06  |
| SIK1      | -4,68884 | 5,00E-08  |
| SERPINB9  | -4,69615 | 2,00E-41  |
| LETM2     | -4,69652 | 4,20E-25  |
| ST6GAL2   | -4,70192 | 0,000233  |
| TMEM255E  | -4,71403 | 3,24E-08  |
| SNX7      | -4,71756 | 1,21E-51  |
| EPHB2     | -4,726   | 1,73E-188 |
| CDC42EP3  | -4,72714 | 9,71E-94  |
| ULBP2     | -4,73674 | 9,73E-12  |
| SH3PXD2A  | -4,74027 | 9,00E-42  |
| TENM4     | -4,7405  | 1,02E-47  |
| ERICH5    | -4,78015 | 0,00068   |

|           |          |           |
|-----------|----------|-----------|
| ADAMTSL1  | -4,78177 | 3,85E-08  |
| PNMA2     | -4,78186 | 5,65E-16  |
| MAL       | -4,78457 | 5,25E-07  |
| PLA2G4A   | -4,78594 | 2,25E-07  |
| MAFF      | -4,79249 | 1,10E-06  |
| LIF       | -4,79709 | 4,14E-21  |
| TOR4A     | -4,80273 | 4,24E-78  |
| PTGS1     | -4,80601 | 4,04E-07  |
| B3GNT5    | -4,80631 | 2,74E-12  |
| BEST3     | -4,80943 | 6,54E-16  |
| HSPG2     | -4,80951 | 2,94E-101 |
| GLRB      | -4,82242 | 1,26E-24  |
| COL6A3    | -4,8276  | 6,71E-08  |
| KIF7      | -4,83119 | 3,74E-09  |
| ZNF702P   | -4,84505 | 1,77E-37  |
| TBX15     | -4,84677 | 5,80E-10  |
| ETV4      | -4,85651 | 1,46E-11  |
| GLRX      | -4,85912 | 3,03E-10  |
| IL18      | -4,86126 | 3,05E-11  |
| CX3CL1    | -4,87329 | 1,42E-06  |
| ANK2      | -4,87579 | 7,23E-28  |
| B3GNT7    | -4,87901 | 3,62E-05  |
| ELFN2     | -4,87909 | 3,46E-24  |
| ICAM1     | -4,8832  | 6,24E-28  |
| NUDT11    | -4,89762 | 2,05E-22  |
| SEMA3E    | -4,89897 | 3,79E-13  |
| TBXAS1    | -4,89965 | 5,13E-15  |
| ECE1      | -4,90941 | 1,43E-176 |
| SP100     | -4,91081 | 2,93E-10  |
| TMEM133   | -4,91131 | 1,45E-12  |
| MRC2      | -4,92235 | 6,90E-34  |
| SMARCA1   | -4,9275  | 2,45E-40  |
| C17orf51  | -4,93637 | 3,42E-34  |
| TRABD2A   | -4,94089 | 2,26E-07  |
| EPHA2     | -4,94358 | 3,67E-47  |
| SLC12A4   | -4,95185 | 1,53E-18  |
| TRNP1     | -4,95321 | 1,42E-93  |
| ALPK3     | -4,95348 | 2,09E-19  |
| ARMCX2    | -4,96049 | 1,64E-39  |
| LINC00472 | -4,96459 | 1,11E-09  |
| ADAM19    | -4,96677 | 2,52E-80  |
| DRAXIN    | -4,96833 | 0,000808  |
| FLJ32255  | -4,97184 | 6,76E-05  |
| BCAR3     | -4,98914 | 1,94E-123 |
| LTBP2     | -5,00513 | 6,33E-46  |
| LDLRAD2   | -5,01702 | 0,000188  |
| BTN3A2    | -5,01827 | 1,57E-18  |
| ANXA3     | -5,02553 | 1,63E-69  |
| SEMA3A    | -5,02594 | 6,96E-16  |
| CAV2      | -5,03138 | 1,65E-104 |

|           |          |           |
|-----------|----------|-----------|
| VIM-AS1   | -5,04365 | 2,99E-54  |
| DACT1     | -5,04824 | 1,85E-12  |
| FAM101B   | -5,05821 | 4,16E-98  |
| AMPH      | -5,06257 | 1,37E-05  |
| BCL2L15   | -5,10303 | 8,64E-34  |
| LYPD1     | -5,10645 | 9,85E-73  |
| TAGLN     | -5,10996 | 3,99E-49  |
| CMTM7     | -5,11201 | 9,40E-71  |
| TMEM92    | -5,11656 | 9,60E-11  |
| FBXO32    | -5,12514 | 1,32E-25  |
| SHC3      | -5,12738 | 1,63E-19  |
| NDRG1     | -5,14677 | 7,72E-131 |
| ANKLE1    | -5,14841 | 1,62E-06  |
| SSPN      | -5,14851 | 1,83E-54  |
| IGF2BP2   | -5,1503  | 1,23E-147 |
| EEPD1     | -5,15638 | 6,37E-30  |
| ZNF528    | -5,16946 | 4,95E-11  |
| SYNE1     | -5,16983 | 4,66E-37  |
| CRIM1     | -5,17649 | 5,31E-84  |
| NAP1L5    | -5,18004 | 1,67E-07  |
| APLN      | -5,18249 | 5,98E-14  |
| DENND1C   | -5,18357 | 4,31E-11  |
| HOXA2     | -5,18606 | 1,76E-08  |
| ST3GAL2   | -5,18763 | 4,80E-61  |
| LOX       | -5,18837 | 5,09E-83  |
| DUSP6     | -5,19693 | 1,11E-09  |
| SPRY4     | -5,20081 | 1,76E-36  |
| LINC00673 | -5,20156 | 4,82E-08  |
| NFKBIZ    | -5,20257 | 2,43E-69  |
| MARCH3    | -5,20376 | 6,34E-14  |
| GPR143    | -5,20479 | 1,04E-51  |
| HOXA-AS3  | -5,20871 | 4,08E-07  |
| DAGLA     | -5,21465 | 6,98E-102 |
| CNIH3     | -5,22294 | 1,04E-09  |
| CREB3L1   | -5,23049 | 4,44E-20  |
| LIX1L     | -5,23057 | 4,44E-60  |
| TLL2      | -5,23647 | 3,57E-34  |
| DENND3    | -5,2379  | 2,12E-43  |
| VEGFC     | -5,24513 | 3,72E-27  |
| MITF      | -5,25449 | 3,63E-17  |
| HLA-B     | -5,2557  | 9,13E-32  |
| LCAT      | -5,25728 | 4,07E-08  |
| ADRB2     | -5,25823 | 2,89E-06  |
| MEIS2     | -5,25853 | 8,98E-07  |
| SEPT10    | -5,26625 | 6,71E-40  |
| SLC16A7   | -5,26639 | 5,56E-22  |
| ADAMTS15  | -5,26718 | 5,26E-34  |
| TIMP2     | -5,26722 | 1,30E-192 |
| PLXNC1    | -5,26782 | 1,41E-23  |
| RASSF4    | -5,27044 | 2,18E-23  |

|           |          |           |
|-----------|----------|-----------|
| PXK       | -5,27069 | 3,00E-35  |
| ST6GAL1   | -5,27291 | 5,53E-47  |
| DGKA      | -5,2773  | 7,84E-28  |
| ARMC4     | -5,29726 | 1,25E-17  |
| ITGB6     | -5,30556 | 1,78E-06  |
| GSTM2     | -5,31184 | 0,000144  |
| ACO1      | -5,31196 | 2,70E-70  |
| CAMK4     | -5,31361 | 8,80E-28  |
| MBP       | -5,32066 | 1,74E-78  |
| LYN       | -5,32289 | 8,39E-40  |
| MSRB3     | -5,3236  | 2,93E-83  |
| PCDHGB4   | -5,32463 | 2,34E-15  |
| MTAP      | -5,32638 | 3,33E-24  |
| ST6GALNA4 | -5,33605 | 1,62E-06  |
| SLITRK5   | -5,34091 | 1,98E-07  |
| PLEKHG4B  | -5,3519  | 2,01E-32  |
| VNN2      | -5,3777  | 8,69E-05  |
| TAPBPL    | -5,38466 | 1,09E-38  |
| DUSP10    | -5,39196 | 1,73E-41  |
| ADAMTS2   | -5,39304 | 0,000847  |
| GNAI1     | -5,40077 | 8,18E-69  |
| EDN2      | -5,40545 | 6,31E-07  |
| ATP8A2    | -5,4065  | 1,81E-32  |
| AGPAT4    | -5,41088 | 7,06E-52  |
| ANXA8     | -5,41797 | 1,51E-07  |
| GRIK2     | -5,41919 | 0,000906  |
| PLAUR     | -5,42194 | 1,27E-29  |
| C14orf159 | -5,42649 | 9,35E-71  |
| ZNF788    | -5,4572  | 4,22E-05  |
| ABHD8     | -5,45729 | 1,26E-27  |
| LBH       | -5,45883 | 0,000592  |
| NAV2      | -5,45906 | 8,57E-144 |
| DSCAML1   | -5,4903  | 1,71E-10  |
| NAP1L3    | -5,49355 | 0,000524  |
| GATA4     | -5,49609 | 2,60E-20  |
| CREB5     | -5,50396 | 8,76E-05  |
| C3orf52   | -5,5105  | 1,33E-16  |
| SATB1     | -5,5349  | 1,47E-11  |
| VILL      | -5,54097 | 3,24E-05  |
| PROS1     | -5,56284 | 3,36E-25  |
| LIMCH1    | -5,56302 | 2,60E-33  |
| TMCC3     | -5,56522 | 2,75E-53  |
| SIRPA     | -5,57215 | 4,45E-170 |
| PAPSS2    | -5,58737 | 5,38E-06  |
| HOXA7     | -5,58918 | 4,37E-17  |
| NLRC5     | -5,62313 | 1,88E-30  |
| ELK3      | -5,63457 | 1,06E-70  |
| TGFB2     | -5,63475 | 8,07E-27  |
| TLR2      | -5,63876 | 1,96E-08  |
| ARAP3     | -5,64119 | 3,33E-56  |

|           |          |           |
|-----------|----------|-----------|
| DOCK3     | -5,64744 | 3,03E-21  |
| PLA2G16   | -5,65715 | 6,23E-77  |
| KCNMA1    | -5,65882 | 1,64E-41  |
| PPP4R4    | -5,66113 | 5,94E-17  |
| TNFAIP3   | -5,66484 | 4,14E-65  |
| CASP10    | -5,67618 | 3,37E-21  |
| ZNF415    | -5,69203 | 1,47E-09  |
| ITGA5     | -5,69452 | 2,27E-145 |
| ACSL5     | -5,69674 | 3,92E-19  |
| DZIP1L    | -5,70729 | 1,56E-09  |
| HOXA-AS2  | -5,71217 | 1,99E-16  |
| PLTP      | -5,72443 | 2,40E-68  |
| RAB32     | -5,73597 | 1,99E-52  |
| ZNF439    | -5,73758 | 0,000149  |
| SOX7      | -5,73814 | 9,95E-28  |
| GEM       | -5,74633 | 9,03E-75  |
| NOG       | -5,75128 | 1,02E-14  |
| SAMD9L    | -5,7522  | 2,76E-09  |
| HSPB6     | -5,75276 | 3,70E-17  |
| INPP1     | -5,76856 | 2,82E-14  |
| APBB1     | -5,77664 | 5,73E-70  |
| MN1       | -5,77779 | 1,86E-11  |
| FNDC4     | -5,77962 | 3,81E-29  |
| EDIL3     | -5,78302 | 2,28E-23  |
| DAB2      | -5,78868 | 3,09E-17  |
| LONRF3    | -5,79482 | 0,000128  |
| IGFBP6    | -5,80159 | 1,92E-37  |
| TMEM173   | -5,80917 | 6,86E-10  |
| ZPLD1     | -5,81251 | 9,16E-05  |
| CAV1      | -5,81552 | 6,67E-115 |
| TRIM6     | -5,82253 | 1,16E-17  |
| HOXC8     | -5,84132 | 1,96E-26  |
| B3GALT5-A | -5,85358 | 2,15E-29  |
| LOC101927 | -5,8577  | 9,95E-05  |
| FAT4      | -5,85874 | 2,49E-41  |
| KHDRBS3   | -5,8687  | 0,000906  |
| GRIK5     | -5,87345 | 1,72E-14  |
| SH2D5     | -5,88545 | 3,68E-84  |
| LPXN      | -5,88584 | 3,79E-143 |
| AOX1      | -5,89307 | 2,02E-15  |
| PTPN22    | -5,89333 | 8,85E-27  |
| DAPK1     | -5,89809 | 2,64E-18  |
| RFTN1     | -5,89958 | 7,98E-86  |
| SFRP4     | -5,90177 | 1,56E-06  |
| GNA15     | -5,90966 | 3,65E-13  |
| CPED1     | -5,91726 | 6,40E-11  |
| RIN2      | -5,92037 | 4,45E-67  |
| CSF1      | -5,92673 | 3,18E-78  |
| LOC400043 | -5,93301 | 2,73E-09  |
| SPOCD1    | -5,9448  | 4,94E-13  |

|           |          |           |
|-----------|----------|-----------|
| ADM       | -5,95902 | 1,65E-36  |
| SRPX      | -5,96198 | 8,29E-57  |
| TBX20     | -5,99354 | 1,18E-09  |
| AMIGO2    | -6,00824 | 1,11E-229 |
| CRYBG3    | -6,02086 | 3,56E-52  |
| CASP4     | -6,03457 | 0,00064   |
| TRANK1    | -6,03772 | 2,56E-32  |
| SH3RF2    | -6,04489 | 4,03E-52  |
| LAT       | -6,04688 | 3,55E-15  |
| CFH       | -6,06013 | 2,26E-05  |
| CD109     | -6,06958 | 1,49E-109 |
| S100A2    | -6,08311 | 2,67E-27  |
| RAB3B     | -6,10696 | 5,11E-104 |
| PRKCA     | -6,11068 | 5,82E-124 |
| FHOD3     | -6,11526 | 8,26E-28  |
| LIPE      | -6,11667 | 1,65E-05  |
| COL7A1    | -6,1234  | 1,72E-78  |
| TTLL6     | -6,12849 | 1,51E-05  |
| PYGL      | -6,14354 | 1,39E-06  |
| CTTNBP2   | -6,14676 | 6,28E-15  |
| MCAM      | -6,1509  | 2,30E-58  |
| PIK3CD    | -6,17541 | 1,24E-54  |
| SH2B3     | -6,17875 | 1,30E-201 |
| GJA1      | -6,18619 | 8,64E-28  |
| PPP1R3C   | -6,19335 | 1,26E-05  |
| ARHGAP23  | -6,20115 | 6,19E-51  |
| CALD1     | -6,22628 | 2,12E-37  |
| SV2A      | -6,23355 | 3,08E-49  |
| CACNG7    | -6,24829 | 7,17E-06  |
| SOX9      | -6,25767 | 1,41E-68  |
| LINC01138 | -6,26826 | 6,83E-06  |
| ARMCX4    | -6,27377 | 3,11E-11  |
| ACOT2     | -6,31556 | 4,52E-24  |
| EPSTI1    | -6,31954 | 4,59E-06  |
| EVA1A     | -6,32309 | 2,81E-44  |
| PNPLA3    | -6,32446 | 4,81E-10  |
| CPM       | -6,33794 | 9,90E-54  |
| KIAA1549L | -6,3397  | 2,14E-123 |
| JAZF1     | -6,35759 | 1,04E-41  |
| ZC3H12C   | -6,36653 | 1,88E-58  |
| DCBLD2    | -6,38735 | 3,66E-156 |
| AKAP12    | -6,39469 | 1,10E-123 |
| UBASH3B   | -6,39533 | 1,33E-99  |
| TIMP4     | -6,40864 | 0,000813  |
| CHST1     | -6,41114 | 1,30E-40  |
| TRO       | -6,41722 | 2,49E-14  |
| APOL6     | -6,42314 | 2,02E-67  |
| PIK3AP1   | -6,42562 | 4,15E-41  |
| ACY3      | -6,42873 | 0,000724  |
| EPB41L2   | -6,45231 | 8,32E-209 |

|           |          |           |
|-----------|----------|-----------|
| SIRPB1    | -6,46234 | 5,11E-12  |
| ARHGEF40  | -6,48282 | 5,26E-47  |
| KCNH1     | -6,50496 | 8,86E-19  |
| LINC01605 | -6,53498 | 1,07E-38  |
| APOL3     | -6,53892 | 2,35E-11  |
| ENTPD3    | -6,55007 | 1,52E-12  |
| PRICKLE1  | -6,55028 | 1,26E-49  |
| MICAL2    | -6,55117 | 4,66E-177 |
| IRAK3     | -6,57546 | 0,000464  |
| LOC101928 | -6,58329 | 0,000485  |
| CLDN1     | -6,58331 | 4,13E-07  |
| PPP1R3G   | -6,58748 | 0,000418  |
| LAMC2     | -6,5896  | 5,21E-117 |
| CD274     | -6,59104 | 4,94E-13  |
| GATA2-AS1 | -6,59997 | 0,000449  |
| CCBE1     | -6,60813 | 1,43E-13  |
| PROCR     | -6,61296 | 8,85E-28  |
| PSMB9     | -6,61754 | 2,29E-70  |
| BEAN1     | -6,61828 | 0,000377  |
| PLAG1     | -6,61918 | 1,58E-09  |
| TRPM8     | -6,6236  | 6,02E-07  |
| KCNE3     | -6,62802 | 0,000354  |
| ANTXR2    | -6,62818 | 5,52E-27  |
| ITGAM     | -6,65569 | 2,29E-10  |
| LOC102724 | -6,65587 | 4,57E-07  |
| EGFR      | -6,6561  | 4,90E-173 |
| ZEB1      | -6,66462 | 2,49E-44  |
| ARL10     | -6,6806  | 0,000314  |
| RAG1      | -6,69323 | 7,11E-16  |
| ZNF426    | -6,74785 | 4,98E-15  |
| APOL1     | -6,76836 | 2,42E-06  |
| IL15      | -6,77333 | 2,59E-10  |
| MILR1     | -6,7911  | 0,000234  |
| SLC4A4    | -6,82016 | 1,30E-15  |
| ZDHHC2    | -6,83158 | 3,93E-59  |
| DPY19L2   | -6,83422 | 1,63E-10  |
| HPGD      | -6,84985 | 1,04E-46  |
| CGNL1     | -6,85762 | 4,85E-47  |
| FHL2      | -6,86034 | 6,99E-37  |
| CAPN2     | -6,87173 | 6,05E-63  |
| ANXA1     | -6,87337 | 1,62E-223 |
| RASSF6    | -6,88192 | 7,09E-11  |
| SCN5A     | -6,89013 | 4,69E-115 |
| CCDC181   | -6,90383 | 4,81E-08  |
| PPP1R14C  | -6,9193  | 1,72E-14  |
| HLX       | -6,93535 | 5,60E-08  |
| LOXL2     | -6,94379 | 1,49E-37  |
| TMEM98    | -6,94645 | 9,15E-104 |
| FLJ45513  | -6,95009 | 0,000107  |
| MID1      | -6,95334 | 5,27E-79  |

|           |          |           |
|-----------|----------|-----------|
| PLSCR4    | -6,9756  | 9,70E-05  |
| ALDH1A1   | -6,97607 | 1,13E-20  |
| NRG2      | -7,00981 | 4,88E-19  |
| IGF2BP1   | -7,02565 | 6,67E-67  |
| ALOX5     | -7,05918 | 7,88E-05  |
| CDKN1C    | -7,06624 | 9,35E-12  |
| BDNF      | -7,06776 | 2,09E-51  |
| TMEM200E  | -7,07343 | 4,04E-22  |
| SPOCK1    | -7,09518 | 1,79E-135 |
| ASB2      | -7,09591 | 8,34E-12  |
| CAND2     | -7,11725 | 6,46E-05  |
| APCDD1L-A | -7,11936 | 1,37E-08  |
| BATF3     | -7,12519 | 5,29E-05  |
| FBN1      | -7,13849 | 2,63E-125 |
| BANK1     | -7,13878 | 6,91E-05  |
| HAPLN3    | -7,14681 | 1,29E-19  |
| CYP24A1   | -7,15192 | 8,22E-302 |
| PIWIL4    | -7,1531  | 4,88E-05  |
| GLIPR1    | -7,1534  | 2,10E-83  |
| CLSTN2    | -7,16039 | 2,48E-37  |
| THSD1     | -7,18946 | 0,000264  |
| BIN1      | -7,20088 | 1,39E-107 |
| HAS3      | -7,20999 | 4,59E-215 |
| GBP1      | -7,21704 | 6,61E-33  |
| PWARSN    | -7,22303 | 0,001009  |
| PIK3R6    | -7,22581 | 0,000911  |
| GCNT4     | -7,22789 | 0,000921  |
| TSLP      | -7,22858 | 0,000941  |
| RGN       | -7,22927 | 0,000969  |
| PLCL2     | -7,22953 | 2,73E-20  |
| MME       | -7,23354 | 2,22E-05  |
| ABCB1     | -7,23972 | 7,99E-51  |
| FAM49A    | -7,24399 | 7,59E-60  |
| TICAM2    | -7,25133 | 0,000918  |
| ST3GAL6   | -7,26935 | 3,43E-05  |
| MPP1      | -7,2761  | 7,23E-68  |
| MIR614    | -7,27782 | 2,94E-05  |
| KLRC1     | -7,28175 | 0,000734  |
| GCKR      | -7,28242 | 0,000725  |
| HBD       | -7,30828 | 0,00068   |
| ABCA13    | -7,31089 | 0,000647  |
| LINC00667 | -7,31548 | 0,000807  |
| PTCHD4    | -7,31914 | 3,02E-27  |
| LTB       | -7,31934 | 1,71E-09  |
| C1QTNF1   | -7,3204  | 1,50E-22  |
| VAT1L     | -7,32194 | 2,21E-16  |
| FMN2      | -7,32362 | 2,70E-21  |
| TP73-AS1  | -7,33423 | 0,000667  |
| NYX       | -7,33818 | 0,000582  |
| ZNF69     | -7,36053 | 0,000585  |



|           |          |           |
|-----------|----------|-----------|
| SERPINA6  | -7,3618  | 0,000545  |
| KCNT2     | -7,36243 | 0,000532  |
| TWIST1    | -7,36351 | 2,66E-13  |
| CCND2-AS1 | -7,36558 | 0,000532  |
| PTPRR     | -7,36558 | 0,000532  |
| IQCA1     | -7,3789  | 3,54E-23  |
| PIANP     | -7,38111 | 4,49E-17  |
| CACNG6    | -7,38175 | 1,99E-13  |
| CH17-408N | -7,38628 | 0,000535  |
| ZNF556    | -7,38815 | 0,000482  |
| PAQR9     | -7,38938 | 0,000467  |
| KCP       | -7,39062 | 0,000467  |
| STXBP5-AS | -7,3931  | 0,000513  |
| HHIPL1    | -7,39558 | 0,000633  |
| SPNS3     | -7,40787 | 0,000744  |
| CYTH4     | -7,41341 | 0,000439  |
| TGM5      | -7,41523 | 0,000419  |
| CORO2B    | -7,42032 | 7,05E-41  |
| HEG1      | -7,42277 | 7,89E-07  |
| ZNF717    | -7,42811 | 1,22E-09  |
| DYSF      | -7,42883 | 1,28E-57  |
| SSTR1     | -7,43704 | 0,000431  |
| FOSL1     | -7,43762 | 4,91E-87  |
| PAK3      | -7,43836 | 1,32E-26  |
| LUM       | -7,44421 | 1,06E-09  |
| IRAK2     | -7,44878 | 0,000981  |
| ENG       | -7,44911 | 4,57E-117 |
| NEK9      | -7,45492 | 9,62E-06  |
| PDGFD     | -7,45729 | 0,000648  |
| ZNF582    | -7,46382 | 0,000347  |
| LINC00312 | -7,46793 | 0,000366  |
| PSG5      | -7,47029 | 0,000442  |
| ALDH2     | -7,47262 | 7,60E-68  |
| ETV5      | -7,47729 | 6,62E-106 |
| TGFB111   | -7,4789  | 2,92E-07  |
| GLYATL2   | -7,49012 | 0,000306  |
| KLHDC7A   | -7,49456 | 1,21E-09  |
| SOGA3     | -7,50527 | 1,46E-21  |
| HIF3A     | -7,50565 | 0,000519  |
| PPAPDC3   | -7,51026 | 0,000307  |
| TMEM132I  | -7,51651 | 0,000307  |
| CABP4     | -7,52556 | 1,03E-05  |
| ZNF844    | -7,53468 | 9,87E-06  |
| PIK3CG    | -7,53852 | 0,000257  |
| TRIM38    | -7,54162 | 0,00026   |
| ZNF280A   | -7,54301 | 0,000379  |
| INHBA-AS1 | -7,5591  | 0,000226  |
| KIFC3     | -7,55986 | 3,05E-60  |
| IL4I1     | -7,5656  | 0,000238  |
| C1RL      | -7,56719 | 2,12E-18  |

|            |          |           |
|------------|----------|-----------|
| LOXL4      | -7,57096 | 2,12E-18  |
| RRN3P1     | -7,57939 | 0,00023   |
| ME3        | -7,5864  | 2,94E-48  |
| LURAP1     | -7,59115 | 8,82E-06  |
| SFTA1P     | -7,60475 | 0,000184  |
| DGKG       | -7,60584 | 2,63E-10  |
| GRIN2B     | -7,62123 | 0,00025   |
| SUCLG2-AS  | -7,62307 | 8,37E-06  |
| IL7        | -7,62336 | 0,000196  |
| CDH10      | -7,62652 | 0,000167  |
| LINC00654  | -7,62914 | 0,000177  |
| C11orf70   | -7,63155 | 7,60E-06  |
| MMP24      | -7,63167 | 7,61E-108 |
| PLA1A      | -7,67215 | 0,000145  |
| CHST4      | -7,67317 | 0,000155  |
| KLHL3      | -7,67573 | 0,000204  |
| PAX8       | -7,67804 | 1,10E-118 |
| HOXB4      | -7,68077 | 5,36E-23  |
| RIN1       | -7,68239 | 2,33E-141 |
| ARSI       | -7,68891 | 0,000133  |
| ST3GAL6-A  | -7,68942 | 0,000129  |
| LOC102724  | -7,68992 | 0,000127  |
| CFI        | -7,69293 | 0,00013   |
| TFPI2      | -7,70062 | 1,18E-05  |
| PRSS12     | -7,70324 | 3,49E-15  |
| LINC00880  | -7,71193 | 0,000113  |
| GIMAP2     | -7,71639 | 0,000147  |
| KIAA1755   | -7,71739 | 0,000167  |
| SULT1C2    | -7,72971 | 0,000113  |
| KCNS1      | -7,73313 | 0,000104  |
| LIN28B     | -7,75691 | 0,000122  |
| MGARP      | -7,76678 | 6,40E-11  |
| CFTR       | -7,77176 | 8,61E-05  |
| CDH5       | -7,78894 | 5,31E-11  |
| NACAD      | -7,82738 | 7,51E-05  |
| MT1M       | -7,82967 | 6,57E-05  |
| DLL3       | -7,83103 | 6,53E-05  |
| TWIST2     | -7,83103 | 6,53E-05  |
| GPC6       | -7,84154 | 9,92E-16  |
| ITPRIPL1   | -7,84773 | 2,71E-06  |
| RNF217     | -7,85942 | 5,09E-16  |
| LINGO2     | -7,86761 | 5,46E-05  |
| KCTD19     | -7,8685  | 5,46E-05  |
| IGFBP7-AS1 | -7,86983 | 5,73E-05  |
| ANKRD7     | -7,87161 | 6,60E-05  |
| DMGDH      | -7,87714 | 2,22E-06  |
| NPM2       | -7,88314 | 5,85E-05  |
| ZNF132     | -7,88621 | 4,99E-05  |
| EVI2A      | -7,88665 | 4,99E-05  |
| DPYSL3     | -7,88958 | 3,18E-200 |

|           |          |           |
|-----------|----------|-----------|
| DKK3      | -7,91409 | 3,07E-139 |
| LOC101928 | -7,92058 | 4,42E-05  |
| ST6GALNA  | -7,9579  | 3,54E-05  |
| FAM189A1  | -7,95808 | 4,37E-50  |
| GAS7      | -7,96197 | 1,16E-11  |
| LOC729987 | -7,96292 | 5,45E-05  |
| LINC01094 | -7,97208 | 3,70E-05  |
| LAMB3     | -7,97235 | 3,16E-08  |
| B3GALT1   | -7,97291 | 3,47E-05  |
| LOC100130 | -7,97291 | 3,47E-05  |
| LINC00899 | -7,97538 | 3,26E-05  |
| ADAMTS14  | -7,97689 | 7,72E-30  |
| IFFO1     | -7,98828 | 1,06E-16  |
| TNFRSF14  | -7,98917 | 9,99E-12  |
| ZBTB20    | -7,98995 | 1,10E-51  |
| ZBTB18    | -8,01148 | 1,28E-72  |
| LHFP      | -8,01589 | 1,65E-40  |
| ILDR2     | -8,01775 | 3,68E-35  |
| SDPR      | -8,01822 | 3,29E-27  |
| CA2       | -8,02618 | 2,42E-87  |
| EPAS1     | -8,03483 | 1,29E-141 |
| COL12A1   | -8,03962 | 9,03E-104 |
| KANK4     | -8,03972 | 2,56E-05  |
| LRRC34    | -8,04011 | 2,49E-05  |
| ADTRP     | -8,04051 | 2,43E-05  |
| RAB42     | -8,04248 | 2,35E-05  |
| LINC01444 | -8,04287 | 2,37E-05  |
| KAAG1     | -8,05546 | 2,49E-05  |
| UGT8      | -8,0563  | 3,77E-05  |
| KRT34     | -8,05897 | 2,17E-05  |
| RBMS3     | -8,06967 | 2,14E-55  |
| FAM196B   | -8,07095 | 1,00E-06  |
| ARHGAP22  | -8,07419 | 3,53E-09  |
| ZNF214    | -8,0895  | 1,86E-05  |
| SMO       | -8,09303 | 2,16E-17  |
| PRDM8     | -8,10584 | 1,70E-05  |
| SCN4B     | -8,10697 | 1,71E-05  |
| PEG10     | -8,10743 | 1,96E-14  |
| ACOT1     | -8,1086  | 8,11E-07  |
| IL1RL2    | -8,12013 | 1,64E-05  |
| LOC102724 | -8,12051 | 1,61E-05  |
| FOXC2-AS1 | -8,13577 | 1,51E-05  |
| LOC100128 | -8,13798 | 1,47E-05  |
| HS3ST3A1  | -8,14737 | 3,27E-61  |
| CHRD1     | -8,1494  | 1,59E-05  |
| MAP3K7CL  | -8,15488 | 1,51E-05  |
| LOC100507 | -8,16653 | 1,27E-05  |
| WT1       | -8,16834 | 1,26E-05  |
| ERAP2     | -8,18038 | 2,59E-106 |
| LINC00857 | -8,18666 | 1,67E-12  |

|           |          |           |
|-----------|----------|-----------|
| TM4SF1    | -8,19047 | 7,96E-222 |
| LRRC15    | -8,19807 | 1,09E-05  |
| FAM65C    | -8,19948 | 1,18E-05  |
| GPRIN2    | -8,20019 | 1,26E-05  |
| MYOM2     | -8,21218 | 9,99E-06  |
| VSIG1     | -8,21358 | 1,05E-05  |
| NAV3      | -8,21513 | 0,000664  |
| CCL28     | -8,22408 | 1,03E-05  |
| ARHGAP28  | -8,22512 | 9,59E-06  |
| CTHRC1    | -8,2364  | 2,17E-142 |
| RBMS3-AS1 | -8,23691 | 1,15E-05  |
| PHACTR1   | -8,24035 | 1,04E-12  |
| LINC01204 | -8,24206 | 8,90E-06  |
| ZNF677    | -8,24309 | 9,58E-06  |
| EMP1      | -8,24381 | 1,09E-12  |
| RELN      | -8,2443  | 3,37E-33  |
| ANKRD33B  | -8,24635 | 5,16E-65  |
| TLX2      | -8,25304 | 8,65E-06  |
| CYP11A1   | -8,26493 | 1,04E-05  |
| CD74      | -8,26888 | 3,88E-87  |
| ASIC2     | -8,28209 | 7,05E-06  |
| TNFSF12   | -8,28276 | 6,94E-06  |
| ADAM12    | -8,28413 | 8,30E-35  |
| C1RL-AS1  | -8,29276 | 8,98E-06  |
| SYT11     | -8,29432 | 9,36E-34  |
| IL31RA    | -8,29673 | 6,45E-06  |
| LOC100507 | -8,29739 | 6,50E-06  |
| LRRN3     | -8,29739 | 6,50E-06  |
| EPHA5     | -8,29838 | 6,79E-06  |
| ITGB8     | -8,30167 | 8,52E-61  |
| CXCL3     | -8,31077 | 3,18E-07  |
| HOXD-AS2  | -8,32299 | 5,74E-06  |
| BST1      | -8,32379 | 1,20E-18  |
| RGS4      | -8,32493 | 5,71E-06  |
| TRIM22    | -8,32935 | 1,70E-74  |
| C15orf52  | -8,33199 | 5,01E-07  |
| TMEM220   | -8,33465 | 6,17E-06  |
| PROM1     | -8,33979 | 5,87E-06  |
| TFCP2     | -8,34354 | 9,35E-05  |
| TMBIM1    | -8,3529  | 2,34E-81  |
| SLIT3     | -8,359   | 1,83E-24  |
| ZNF655    | -8,36531 | 0,00031   |
| TNFAIP2   | -8,36583 | 5,85E-89  |
| NDP       | -8,36748 | 5,95E-06  |
| CDO1      | -8,37378 | 5,30E-06  |
| MSC       | -8,37566 | 4,41E-06  |
| RTP4      | -8,39094 | 4,06E-06  |
| SERP2     | -8,39217 | 4,44E-06  |
| MIR100HG  | -8,3985  | 2,31E-07  |
| CDHR1     | -8,40176 | 3,79E-06  |

|           |          |           |
|-----------|----------|-----------|
| PWAR5     | -8,40207 | 3,75E-06  |
| SLC34A2   | -8,40268 | 3,71E-06  |
| JPH2      | -8,41181 | 2,04E-07  |
| NLRP3     | -8,41943 | 1,95E-13  |
| FAM150B   | -8,42709 | 3,32E-06  |
| ZFP92     | -8,43131 | 4,11E-06  |
| ZNF229    | -8,43884 | 3,25E-06  |
| TM4SF4    | -8,44538 | 0,000355  |
| ZNF625    | -8,45257 | 2,86E-06  |
| LINC00704 | -8,45317 | 2,86E-06  |
| LINC01391 | -8,45405 | 2,94E-06  |
| ROBO1     | -8,45429 | 5,32E-144 |
| LYNX1     | -8,45613 | 3,59E-06  |
| COL4A6    | -8,46015 | 1,64E-07  |
| PHYHD1    | -8,46814 | 2,75E-06  |
| HOXB3     | -8,47269 | 1,43E-19  |
| MYRF      | -8,48095 | 6,66E-09  |
| ZNF71     | -8,48595 | 1,04E-13  |
| CSDC2     | -8,52813 | 2,42E-06  |
| LINC01561 | -8,53601 | 1,86E-06  |
| POU4F1    | -8,53797 | 1,90E-06  |
| STEAP2    | -8,53999 | 2,98E-06  |
| ZNF577    | -8,55993 | 1,62E-06  |
| CNN1      | -8,56021 | 1,63E-06  |
| ZFPM2-AS1 | -8,57093 | 1,53E-06  |
| COL4A2-AS | -8,58482 | 1,63E-06  |
| NEURL3    | -8,59321 | 1,37E-06  |
| ADGRF1    | -8,60396 | 1,31E-06  |
| GPR15     | -8,60529 | 1,29E-06  |
| BCO1      | -8,60635 | 1,35E-06  |
| SNPH      | -8,60788 | 2,13E-20  |
| MDFI      | -8,61489 | 1,24E-06  |
| ZNF671    | -8,61647 | 1,22E-06  |
| UCN2      | -8,61779 | 7,58E-08  |
| ICAM2     | -8,62577 | 7,27E-08  |
| DIRAS3    | -8,62915 | 1,29E-06  |
| BICC1     | -8,63505 | 7,18E-155 |
| ZNF501    | -8,63624 | 1,15E-06  |
| GGT8P     | -8,63781 | 1,08E-06  |
| APCDD1L   | -8,66037 | 9,83E-07  |
| NRP2      | -8,66216 | 2,17E-146 |
| PTX3      | -8,66526 | 1,43E-06  |
| VSTM1     | -8,6691  | 9,24E-07  |
| RARRES1   | -8,68081 | 8,56E-07  |
| LPL       | -8,69118 | 8,09E-07  |
| MMP2      | -8,72003 | 4,06E-21  |
| MMP7      | -8,72184 | 6,86E-07  |
| ZC4H2     | -8,72948 | 1,13E-14  |
| ZNF583    | -8,73386 | 6,92E-07  |
| FAM90A1   | -8,74265 | 6,14E-07  |

|           |          |           |
|-----------|----------|-----------|
| USP44     | -8,7441  | 6,62E-07  |
| SAA1      | -8,75595 | 7,96E-07  |
| PHYHIP    | -8,76197 | 5,54E-07  |
| ZNF502    | -8,76268 | 5,52E-07  |
| LIPC      | -8,767   | 9,26E-07  |
| SMIM6     | -8,78079 | 5,23E-07  |
| ZIK1      | -8,78457 | 5,74E-07  |
| GABRE     | -8,80217 | 4,47E-07  |
| PSG4      | -8,81032 | 4,35E-07  |
| PDE10A    | -8,81148 | 9,70E-08  |
| GCNT2     | -8,81221 | 1,17E-21  |
| UNC13C    | -8,82163 | 4,07E-07  |
| ANXA8L1   | -8,83218 | 4,13E-07  |
| UCA1      | -8,83628 | 4,50E-28  |
| KLHL4     | -8,86759 | 2,99E-15  |
| NTNG1     | -8,86985 | 1,57E-28  |
| NIPAL4    | -8,8765  | 2,99E-07  |
| EMP3      | -8,88687 | 4,25E-76  |
| ARHGAP31  | -8,88709 | 2,86E-07  |
| CATSPER1  | -8,88731 | 2,89E-07  |
| MICU3     | -8,92958 | 2,38E-07  |
| FGFBP1    | -8,93298 | 2,39E-07  |
| SGIP1     | -8,94021 | 2,09E-07  |
| NYAP2     | -8,94021 | 2,09E-07  |
| BIRC3     | -8,94162 | 3,29E-105 |
| SLC2A2    | -8,9455  | 2,76E-07  |
| SAMD5     | -8,94761 | 2,08E-07  |
| UCHL1     | -8,95423 | 4,93E-62  |
| UPK1B     | -8,95895 | 2,01E-07  |
| ZNF518B   | -8,97538 | 1,74E-07  |
| LOC152225 | -8,99021 | 1,72E-07  |
| BAIAP2L2  | -8,99158 | 2,61E-36  |
| RNF128    | -8,99719 | 3,26E-06  |
| HSPB2     | -9,00711 | 1,56E-07  |
| ITGA1     | -9,02464 | 1,08E-08  |
| ZNF385D   | -9,02899 | 1,88E-07  |
| CLIP4     | -9,03635 | 3,12E-37  |
| ATP6V1B1- | -9,04406 | 1,37E-07  |
| SRPX2     | -9,04781 | 1,35E-07  |
| CCDC80    | -9,05139 | 2,64E-184 |
| HOXB8     | -9,0754  | 1,40E-29  |
| IL32      | -9,07742 | 4,58E-15  |
| ZKSCAN7   | -9,08547 | 1,28E-07  |
| ZNF826P   | -9,11169 | 9,36E-08  |
| KCTD4     | -9,11376 | 8,01E-08  |
| ITGB3     | -9,12468 | 6,56E-09  |
| PPARGC1A  | -9,12909 | 7,40E-08  |
| BNC2      | -9,12924 | 5,99E-09  |
| FBLN7     | -9,13075 | 7,79E-08  |
| PTPRD-AS1 | -9,13466 | 8,54E-08  |

|           |          |           |
|-----------|----------|-----------|
| CLMP      | -9,16006 | 1,21E-30  |
| FOXC2     | -9,16992 | 5,11E-09  |
| NALCN     | -9,18042 | 6,27E-08  |
| TRPC4     | -9,1986  | 5,37E-08  |
| ZNF559    | -9,21236 | 4,69E-08  |
| IL7R      | -9,21832 | 4,57E-08  |
| ZFP82     | -9,22373 | 5,42E-08  |
| C3AR1     | -9,2272  | 4,39E-08  |
| HOXB5     | -9,24018 | 4,00E-08  |
| CDH2      | -9,24983 | 1,62E-129 |
| NLGN1     | -9,25389 | 3,81E-08  |
| FMOD      | -9,26544 | 5,16E-08  |
| EBI3      | -9,27656 | 3,28E-08  |
| AJAP1     | -9,28496 | 5,19E-06  |
| GREM2     | -9,29226 | 3,66E-08  |
| TSPAN18   | -9,30148 | 2,74E-09  |
| PTPN20    | -9,30318 | 2,80E-08  |
| VGLL3     | -9,31745 | 2,58E-08  |
| HHIP-AS1  | -9,3194  | 3,03E-08  |
| POU5F1    | -9,32428 | 2,48E-08  |
| FBLN1     | -9,32706 | 1,79E-07  |
| C8orf31   | -9,33077 | 2,38E-08  |
| OSR1      | -9,34942 | 2,32E-09  |
| BVES      | -9,34989 | 2,18E-08  |
| ADAMTS16  | -9,35163 | 2,20E-08  |
| RNF175    | -9,35673 | 2,08E-08  |
| NKX2-4    | -9,36339 | 2,00E-08  |
| MPP4      | -9,38161 | 1,99E-08  |
| TGFBI     | -9,38428 | 3,27E-86  |
| KCCAT198  | -9,39945 | 2,33E-08  |
| SCN9A     | -9,40773 | 1,93E-17  |
| KCNJ2     | -9,40989 | 1,57E-08  |
| LINC01322 | -9,40989 | 1,57E-08  |
| TNFRSF1B  | -9,41555 | 1,48E-08  |
| ST8SIA2   | -9,42771 | 1,50E-09  |
| S1PR1     | -9,43283 | 1,44E-08  |
| KCNJ16    | -9,43298 | 1,42E-08  |
| TIE1      | -9,43929 | 1,36E-08  |
| NCAM1     | -9,445   | 2,91E-55  |
| KCNQ3     | -9,46383 | 1,20E-08  |
| ZNF215    | -9,48345 | 1,01E-08  |
| SERPINE1  | -9,4878  | 1,70E-10  |
| ZNF667-AS | -9,50711 | 8,82E-09  |
| DSC3      | -9,51561 | 5,21E-18  |
| SLAMF7    | -9,51725 | 1,50E-08  |
| MSC-AS1   | -9,52475 | 7,99E-09  |
| ZNF470    | -9,53769 | 7,75E-09  |
| ZNF667    | -9,57011 | 6,43E-09  |
| GLI2      | -9,57467 | 6,67E-42  |
| TMEM47    | -9,57604 | 4,05E-18  |

|           |          |           |
|-----------|----------|-----------|
| C11orf45  | -9,57613 | 6,07E-09  |
| HDAC9     | -9,59006 | 5,01E-65  |
| ZNF660    | -9,5994  | 5,22E-09  |
| NEFL      | -9,61476 | 5,03E-09  |
| NPR2      | -9,62044 | 5,51E-10  |
| PLAT      | -9,62098 | 4,64E-09  |
| EREG      | -9,62983 | 4,99E-11  |
| OSBPL3    | -9,6452  | 1,49E-94  |
| ADRA1B    | -9,66179 | 4,98E-09  |
| MPV17L    | -9,68069 | 3,29E-09  |
| TNC       | -9,68958 | 6,24E-74  |
| NEXN      | -9,70331 | 2,79E-27  |
| MIR31HG   | -9,71616 | 2,75E-09  |
| ZNF665    | -9,71677 | 2,68E-09  |
| FGF1      | -9,72073 | 2,80E-09  |
| PSG1      | -9,72885 | 2,83E-09  |
| SERPINB7  | -9,72922 | 3,00E-09  |
| MT1A      | -9,74714 | 2,27E-09  |
| SLFN12    | -9,74726 | 2,26E-09  |
| C10orf55  | -9,74907 | 2,53E-09  |
| GPX7      | -9,75089 | 2,42E-09  |
| SLC43A3   | -9,75251 | 4,27E-05  |
| KCNJ12    | -9,76268 | 2,08E-09  |
| MT1G      | -9,79399 | 2,08E-09  |
| NUDT16P1  | -9,79587 | 1,77E-09  |
| GLIS3     | -9,79657 | 3,94E-08  |
| APOBEC3D  | -9,7975  | 1,74E-09  |
| PRKCQ-AS1 | -9,81553 | 1,55E-09  |
| FSTL1     | -9,81758 | 4,05E-133 |
| SIM1      | -9,8339  | 1,47E-09  |
| DEPDC7    | -9,83959 | 1,34E-09  |
| CCRL2     | -9,84038 | 1,35E-09  |
| GSTP1     | -9,84836 | 2,59E-138 |
| GJC1      | -9,85276 | 1,08E-36  |
| ADAMTS18  | -9,85318 | 2,29E-09  |
| SEC14L6   | -9,85733 | 1,29E-09  |
| MALL      | -9,86437 | 2,26E-09  |
| CSMD3     | -9,86504 | 1,34E-09  |
| GLYATL1   | -9,86906 | 1,21E-09  |
| SLC16A12  | -9,87096 | 1,67E-09  |
| ZNF90     | -9,87339 | 1,15E-09  |
| KLHL14    | -9,87384 | 1,20E-09  |
| PRKCQ     | -9,87551 | 1,21E-09  |
| LY6K      | -9,87838 | 1,16E-09  |
| APOBEC3C  | -9,88182 | 5,12E-62  |
| SFRP1     | -9,89247 | 1,40E-09  |
| NOX4      | -9,89499 | 9,82E-10  |
| BCHE      | -9,8963  | 1,01E-09  |
| CHST9     | -9,92229 | 8,35E-10  |
| ZNF773    | -9,92722 | 8,21E-10  |



|           |          |           |
|-----------|----------|-----------|
| ZNF334    | -9,95665 | 7,08E-10  |
| NLRP1     | -9,96291 | 1,03E-10  |
| P3H3      | -9,98177 | 1,33E-10  |
| CD70      | -9,98696 | 9,18E-20  |
| P2RY8     | -10,0063 | 5,95E-10  |
| CYS1      | -10,0158 | 7,30E-11  |
| IPW       | -10,0228 | 5,25E-10  |
| SUSD5     | -10,0294 | 4,52E-10  |
| LOC72997C | -10,0408 | 4,46E-10  |
| GBP3      | -10,0472 | 6,63E-11  |
| ZFP28     | -10,0696 | 3,67E-10  |
| C3        | -10,0732 | 9,74E-104 |
| ZNF626    | -10,0797 | 3,72E-10  |
| ITGBL1    | -10,1192 | 2,99E-10  |
| MDFIC     | -10,131  | 6,33E-30  |
| GSPT2     | -10,1372 | 2,43E-10  |
| PEAR1     | -10,1579 | 3,51E-11  |
| AGPS      | -10,1583 | 3,46E-66  |
| CYGB      | -10,1696 | 8,97E-21  |
| CCND2     | -10,1704 | 1,28E-180 |
| SLC22A3   | -10,172  | 2,05E-10  |
| EBF3      | -10,1747 | 1,96E-10  |
| SP140     | -10,1922 | 1,91E-10  |
| PIEZO2    | -10,1951 | 1,97E-10  |
| NXPH2     | -10,2005 | 1,70E-10  |
| SRGN      | -10,2007 | 2,86E-11  |
| MYH16     | -10,2088 | 2,75E-11  |
| PDCD1LG2  | -10,226  | 1,46E-10  |
| NETO1     | -10,2315 | 1,72E-10  |
| ZC3HAV1L  | -10,2443 | 1,31E-10  |
| SNHG18    | -10,2938 | 9,96E-11  |
| HACD4     | -10,3098 | 9,09E-11  |
| TOX       | -10,3119 | 9,95E-11  |
| ARSI      | -10,3246 | 3,02E-31  |
| DLGAP1    | -10,3274 | 8,09E-11  |
| TLR6      | -10,3281 | 8,34E-11  |
| CPA4      | -10,3328 | 2,72E-31  |
| FAM155A   | -10,34   | 7,67E-11  |
| RARRES2   | -10,3404 | 7,53E-11  |
| DOCK2     | -10,3478 | 1,97E-31  |
| FOXG1     | -10,3545 | 7,05E-11  |
| PSMB8     | -10,362  | 4,65E-41  |
| APOBEC3G  | -10,3681 | 6,79E-11  |
| EYA4      | -10,3693 | 8,13E-11  |
| FGF2      | -10,3701 | 3,12E-41  |
| FOXL1     | -10,3824 | 6,20E-11  |
| TLR3      | -10,4218 | 7,17E-11  |
| CASP1     | -10,4649 | 3,65E-11  |
| LINC01111 | -10,4921 | 3,13E-11  |
| SIGLEC15  | -10,4984 | 3,00E-11  |

|           |          |           |
|-----------|----------|-----------|
| CARD11    | -10,5022 | 3,71E-11  |
| AFAP1L1   | -10,5377 | 2,08E-22  |
| ETV1      | -10,5534 | 4,29E-12  |
| ZFPM2     | -10,5536 | 2,20E-11  |
| MMP14     | -10,5653 | 1,79E-05  |
| GIPC2     | -10,5685 | 2,00E-11  |
| LINC01411 | -10,586  | 1,86E-11  |
| LZTS1     | -10,6103 | 1,56E-11  |
| ZNF320    | -10,6104 | 1,56E-11  |
| BMPER     | -10,6133 | 1,54E-11  |
| GREM1     | -10,6134 | 1,55E-11  |
| CARD6     | -10,6206 | 1,52E-11  |
| ACTBL2    | -10,6307 | 1,50E-11  |
| GABRB3    | -10,6494 | 2,73E-12  |
| ZNF506    | -10,6572 | 1,21E-11  |
| CSF2      | -10,6652 | 1,41E-11  |
| MSN       | -10,6879 | 1,63E-10  |
| DENND2A   | -10,6885 | 9,96E-12  |
| CCAT1     | -10,6926 | 1,03E-11  |
| UBA7      | -10,7096 | 8,92E-12  |
| LINC00958 | -10,711  | 3,64E-44  |
| SKAP1     | -10,7219 | 8,20E-12  |
| ZNF300    | -10,7468 | 7,20E-12  |
| KLK11     | -10,7575 | 6,67E-12  |
| HECW1     | -10,7756 | 6,29E-12  |
| CNRIP1    | -10,7958 | 5,61E-12  |
| ZNF649    | -10,8226 | 4,66E-12  |
| LDHB      | -10,8337 | 0,000189  |
| SENCR     | -10,8575 | 3,96E-12  |
| PAPPA     | -10,8651 | 4,35E-12  |
| BNC1      | -10,8924 | 3,08E-12  |
| INA       | -10,8985 | 3,06E-12  |
| PDGFRB    | -10,9023 | 2,84E-12  |
| CCDC8     | -10,9326 | 2,48E-12  |
| QRFPR     | -10,9382 | 2,34E-12  |
| CXCL2     | -10,9438 | 2,28E-12  |
| ITGA11    | -10,9496 | 2,42E-12  |
| RGS20     | -10,9499 | 2,30E-12  |
| IL1A      | -10,9559 | 2,12E-12  |
| GAL3ST1   | -10,9684 | 2,48E-12  |
| SPP1      | -10,9767 | 5,43E-08  |
| SLC35F3   | -10,9776 | 2,07E-12  |
| VCAN      | -10,9843 | 6,44E-197 |
| ARSE      | -10,9886 | 1,82E-12  |
| SERPINB2  | -10,9896 | 2,17E-12  |
| FIGN      | -11,0151 | 1,97E-12  |
| ZNF280B   | -11,0255 | 1,38E-12  |
| SMIM10    | -11,0542 | 1,16E-12  |
| C7orf31   | -11,0737 | 1,17E-12  |
| SDHAF3    | -11,0934 | 9,63E-13  |

|           |          |           |
|-----------|----------|-----------|
| C1orf186  | -11,0943 | 9,20E-13  |
| GNG11     | -11,1149 | 4,11E-25  |
| PHLDB2    | -11,1452 | 4,85E-80  |
| TAGLN3    | -11,1467 | 6,74E-13  |
| CHST2     | -11,1645 | 6,45E-13  |
| CLEC4E    | -11,1652 | 7,05E-13  |
| SLC35G2   | -11,1708 | 6,74E-13  |
| NTF3      | -11,1739 | 6,00E-13  |
| ANKRD1    | -11,2108 | 1,21E-13  |
| SGK2      | -11,217  | 4,47E-13  |
| HOXA9     | -11,2233 | 4,71E-13  |
| LINC01279 | -11,2338 | 4,05E-13  |
| TLE4      | -11,2497 | 1,00E-13  |
| TDRP      | -11,2508 | 3,71E-13  |
| SPAG16    | -11,2535 | 3,65E-13  |
| CTSZ      | -11,2953 | 1,36E-157 |
| SLFN13    | -11,2973 | 2,84E-13  |
| ZNF175    | -11,3014 | 2,75E-13  |
| GYPC      | -11,3052 | 2,65E-13  |
| CA13      | -11,3154 | 3,00E-13  |
| KCNK3     | -11,3466 | 4,11E-26  |
| SYT14     | -11,3576 | 1,96E-13  |
| HOXA10-AS | -11,3631 | 1,95E-13  |
| CXCL6     | -11,3639 | 1,88E-13  |
| LPAR1     | -11,3667 | 2,06E-13  |
| SOX17     | -11,3679 | 1,92E-13  |
| ZNF542P   | -11,3715 | 1,83E-13  |
| SLC6A15   | -11,3741 | 1,79E-13  |
| TRHDE-AS1 | -11,388  | 1,88E-13  |
| FGF5      | -11,4281 | 1,47E-13  |
| CD200     | -11,4318 | 1,30E-13  |
| ZSCAN18   | -11,4484 | 1,14E-13  |
| PADI1     | -11,4489 | 1,17E-13  |
| DMD       | -11,4576 | 1,08E-13  |
| STK33     | -11,4577 | 1,08E-13  |
| TLR4      | -11,4754 | 1,05E-13  |
| LINC00839 | -11,4981 | 9,49E-14  |
| TNFRSF9   | -11,5702 | 7,89E-14  |
| HKDC1     | -11,5911 | 5,47E-40  |
| PNMAL1    | -11,6086 | 4,63E-14  |
| FLI1      | -11,6184 | 1,21E-14  |
| UGT2B7    | -11,639  | 4,01E-14  |
| GDNF      | -11,6975 | 2,54E-14  |
| LOC100126 | -11,6985 | 2,54E-14  |
| GLIS1     | -11,7212 | 2,31E-14  |
| CPNE8     | -11,7277 | 2,19E-14  |
| ADAMTS5   | -11,7328 | 2,12E-14  |
| MYOM3     | -11,7455 | 1,96E-14  |
| C8orf88   | -11,7499 | 1,86E-14  |
| ANGPTL2   | -11,7629 | 1,79E-14  |

|           |          |           |
|-----------|----------|-----------|
| NID2      | -11,7678 | 1,70E-14  |
| IFI16     | -11,7834 | 2,56E-28  |
| LINC00941 | -11,8021 | 1,38E-14  |
| CLDN2     | -11,8541 | 1,07E-14  |
| PRKCDBP   | -11,8599 | 1,02E-14  |
| CYTL1     | -11,8647 | 9,38E-15  |
| FBXL7     | -11,9003 | 7,61E-15  |
| NEGR1     | -11,9124 | 7,47E-15  |
| BHMT2     | -11,9353 | 6,11E-15  |
| ARHGAP31  | -11,9584 | 1,72E-15  |
| PDZK1IP1  | -11,9711 | 5,80E-15  |
| CXCL1     | -11,9821 | 4,62E-15  |
| GRAMD1B   | -11,9931 | 4,33E-15  |
| TNFRSF10C | -11,9959 | 4,53E-15  |
| TMEM200A  | -11,9965 | 4,35E-15  |
| DAW1      | -12,0519 | 3,03E-15  |
| CRYAB     | -12,0657 | 2,83E-15  |
| GNE       | -12,072  | 3,03E-15  |
| F2RL2     | -12,0952 | 2,32E-15  |
| TCF4      | -12,1191 | 2,03E-15  |
| C5orf42   | -12,1703 | 1,47E-15  |
| GCNT3     | -12,1941 | 1,28E-15  |
| HRH1      | -12,1976 | 1,26E-15  |
| ADAMTS3   | -12,2004 | 1,24E-15  |
| DPYD      | -12,2305 | 1,03E-15  |
| FOXL2NB   | -12,2377 | 1,01E-15  |
| HHIP      | -12,242  | 9,68E-16  |
| ZEB2      | -12,2422 | 9,86E-16  |
| PREX2     | -12,2575 | 8,64E-16  |
| SEMA5A    | -12,2621 | 8,43E-16  |
| FRG1CP    | -12,271  | 8,03E-16  |
| C14orf105 | -12,2855 | 9,17E-16  |
| FOXE1     | -12,2959 | 7,15E-16  |
| TMEM25    | -12,3097 | 6,29E-16  |
| AASS      | -12,3217 | 5,89E-16  |
| COL4A2    | -12,3332 | 2,96E-196 |
| KCNIP1    | -12,3335 | 5,51E-16  |
| AKR1B1    | -12,3338 | 1,04E-86  |
| NRG1      | -12,3398 | 5,57E-16  |
| COL8A1    | -12,3452 | 4,35E-31  |
| ABCA1     | -12,3583 | 5,16E-16  |
| TNFSF10   | -12,3727 | 1,51E-16  |
| CLDN16    | -12,3738 | 4,27E-16  |
| ZFHX4     | -12,3865 | 3,93E-16  |
| ANPEP     | -12,3944 | 3,83E-16  |
| CDH6      | -12,4006 | 1,27E-16  |
| ZCCHC11   | -12,4301 | 3,50E-16  |
| SIGMAR1   | -12,4322 | 1,47E-31  |
| EDNRA     | -12,449  | 2,79E-16  |
| CDA       | -12,4701 | 2,36E-16  |

|           |          |           |
|-----------|----------|-----------|
| RRAD      | -12,4731 | 2,33E-16  |
| GALNT5    | -12,5072 | 1,95E-16  |
| ZBED2     | -12,5264 | 1,66E-16  |
| EVC       | -12,5459 | 1,52E-16  |
| BHLHE41   | -12,5629 | 4,93E-17  |
| TMEM246   | -12,575  | 1,25E-16  |
| ATP10A    | -12,5791 | 1,28E-16  |
| MMP1      | -12,649  | 7,83E-17  |
| SNAI2     | -12,6496 | 7,82E-17  |
| ADAMTS1   | -12,6541 | 2,81E-17  |
| CDIP1     | -12,6789 | 6,95E-17  |
| EMC10     | -12,6821 | 7,97E-17  |
| RAB38     | -12,7007 | 5,65E-17  |
| TCEAL8    | -12,7522 | 4,16E-17  |
| DZIP1     | -12,7556 | 4,11E-17  |
| HOXA10    | -12,7697 | 3,68E-17  |
| C2CD2     | -12,8043 | 3,14E-17  |
| LAYN      | -12,8317 | 2,63E-17  |
| CD40      | -12,8351 | 2,51E-17  |
| SGCE      | -12,868  | 2,09E-17  |
| PTPRD     | -12,9177 | 1,47E-17  |
| CELF2     | -13,0558 | 6,00E-18  |
| PPAPDC1A  | -13,0596 | 6,06E-18  |
| MARCH4    | -13,0696 | 5,72E-18  |
| AKT3      | -13,0839 | 5,03E-18  |
| PKIA      | -13,0938 | 4,79E-18  |
| MAGI2-AS3 | -13,1407 | 3,53E-18  |
| STAC      | -13,2119 | 2,21E-18  |
| PVRL3     | -13,2333 | 1,94E-18  |
| MAMDC2    | -13,2789 | 1,46E-18  |
| FOXL2     | -13,2956 | 1,35E-18  |
| PAX6      | -13,2967 | 1,31E-18  |
| TM4SF18   | -13,3286 | 1,14E-18  |
| AXL       | -13,3458 | 2,68E-53  |
| AK5       | -13,3736 | 8,33E-19  |
| MOXD1     | -13,3937 | 7,21E-19  |
| WBP5      | -13,3974 | 6,68E-19  |
| GDF5      | -13,4078 | 6,65E-19  |
| JAM3      | -13,4088 | 6,82E-19  |
| CXCL5     | -13,4181 | 6,21E-19  |
| HAVCR1    | -13,4391 | 6,23E-19  |
| TGM2      | -13,4464 | 9,59E-255 |
| CLDN11    | -13,6307 | 6,35E-20  |
| CYBRD1    | -13,6679 | 1,16E-19  |
| NRIP3     | -13,6772 | 1,08E-19  |
| NTM       | -13,7647 | 6,20E-20  |
| GOS2      | -13,8042 | 4,65E-20  |
| COL4A1    | -13,811  | 4,29E-57  |
| IGFBP7    | -13,8128 | 4,53E-20  |
| NT5E      | -13,8278 | 3,98E-20  |

|          |          |          |
|----------|----------|----------|
| HNF1B    | -13,8694 | 3,01E-20 |
| KIAA1644 | -13,9174 | 2,19E-20 |
| PTPRM    | -13,9213 | 2,14E-20 |
| LAMA1    | -13,9564 | 1,73E-20 |
| STK32B   | -13,9595 | 1,69E-20 |
| TRHDE    | -13,9987 | 1,30E-20 |
| RAC2     | -14,0043 | 1,25E-20 |
| MYL9     | -14,0711 | 8,13E-21 |
| NNMT     | -14,099  | 6,42E-21 |
| EFEMP2   | -14,1494 | 4,58E-21 |
| TRIM55   | -14,1497 | 1,86E-21 |
| NID1     | -14,1539 | 4,44E-21 |
| IGF2BP3  | -14,2306 | 2,66E-21 |
| APBB1IP  | -14,2869 | 1,84E-21 |
| CDH13    | -14,4374 | 7,45E-22 |
| MT1L     | -14,5179 | 3,84E-22 |
| LAMA4    | -14,5901 | 2,24E-22 |
| HMGA2    | -14,6683 | 5,23E-23 |
| CNN3     | -14,6704 | 5,07E-23 |
| VCAM1    | -14,6711 | 1,32E-22 |
| DFNA5    | -14,7218 | 9,04E-23 |
| SALL1    | -14,7612 | 6,82E-23 |
| TINAGL1  | -14,8158 | 4,83E-23 |
| INHBA    | -14,9327 | 2,06E-23 |
| MT1E     | -14,9636 | 1,64E-23 |
| ALPK2    | -15,0137 | 1,19E-23 |
| CDH4     | -15,1178 | 5,39E-24 |
| PDPN     | -15,1213 | 5,39E-24 |
| ETS1     | -15,1838 | 3,38E-24 |
| GPX1     | -15,2205 | 2,60E-24 |
| IGFN1    | -15,3042 | 1,45E-24 |
| KIRREL   | -15,3837 | 8,03E-25 |
| THBS2    | -15,6934 | 8,13E-26 |
| PLAU     | -15,7782 | 4,48E-26 |
| SPARC    | -16,4677 | 2,32E-28 |
| LRRN4    | -17,162  | 9,63E-31 |
| PTGIS    | -17,5742 | 3,29E-32 |
| FLNC     | -18,4392 | 2,31E-35 |
